# Supplementary material for: iTRAQ Quantitative Proteomic Comparison of Metastatic and Non-Metastatic Uveal Melanoma Tumors
Source: PubMed Central journal article supplement (PMC4549237; doi:10.1371/journal.pone.0135543), 2015-08-25
Supplement: pone.0135543.s001.pdf [file pone.0135543.s001.pdf]

**Supplementary Table S1**  
**Relative Protein Abundance: Sample UM19, Metastatic**

Total Proteins Quantified = 899; LogMedian Protein Ratio = 0.13; LogMeanProtein Ratio = 0; Standard Deviation = 0.97

| Uni-Prot Accession | Protein                                                       | Ratio UM/Control | Standard Deviation | p value | Unique Peptides | % Sequence Coverage |
|--------------------|---------------------------------------------------------------|------------------|--------------------|---------|-----------------|---------------------|
| P23381             | Tryptophan--tRNA ligase, cytoplasmic                          | 13.98            | 0.162              | 3.0E-09 | 13              | 25.9                |
| P52566             | Rho GDP-dissociation inhibitor 2                              | 10.32            | 0.151              | 2.7E-07 | 4               | 25.4                |
| P62937             | Peptidyl-prolyl cis-trans isomerase A                         | 8.13             | 0.085              | 0.0E+00 | 7               | 38.2                |
| P31146             | Coronin-1A                                                    | 6.73             | 0.256              | 8.0E-04 | 6               | 15.2                |
| P32455             | Interferon-induced guanylate-binding protein 1                | 6.58             | 0.214              | 9.2E-04 | 9               | 15.0                |
| Q9UL46             | Proteasome activator complex subunit 2                        | 6.45             | 0.111              | 2.2E-05 | 5               | 22.6                |
| P18463             | HLA class I histocompatibility antigen, B-37 alpha chain      | 5.99             | 0.269              | 2.7E-03 | 3               | 12.4                |
| P42224             | Signal transducer and activator of transcription 1-alpha/beta | 5.64             | 0.098              | 2.4E-13 | 17              | 25.2                |
| P60174             | Triosephosphate isomerase                                     | 5.56             | 0.128              | 1.0E-04 | 10              | 38.5                |
| P30086             | Phosphatidylethanolamine-binding protein 1                    | 5.50             | 0.088              | 3.1E-06 | 9               | 55.6                |
| P19971             | Thymidine phosphorylase                                       | 5.48             | 0.216              | 3.0E-04 | 8               | 21.8                |
| P29401             | Transketolase                                                 | 5.36             | 0.122              | 6.3E-05 | 9               | 14.6                |
| P40121             | Macrophage-capping protein                                    | 5.33             | 0.354              | 1.5E-02 | 4               | 16.7                |
| P00558             | Phosphoglycerate kinase 1                                     | 5.30             | 0.104              | 2.2E-11 | 14              | 28.8                |
| P78417             | Glutathione S-transferase omega-1                             | 5.23             | 0.127              | 7.8E-08 | 13              | 46.5                |
| P16401             | Histone H1.5                                                  | 5.17             | 0.085              | 8.4E-04 | 4               | 14.6                |
| P40925             | Malate dehydrogenase, cytoplasmic                             | 5.13             | 0.153              | 1.6E-05 | 6               | 22.2                |
| Q03519             | Antigen peptide transporter 2                                 | 5.03             | 0.071              | 4.4E-06 | 5               | 8.6                 |
| P23528             | Cofilin-1                                                     | 4.97             | 0.121              | 3.9E-05 | 6               | 33.1                |
| P06737             | Glycogen phosphorylase, liver form                            | 4.96             | 0.089              | 8.9E-16 | 24              | 27.0                |
| P30043             | Flavin reductase (NADPH)                                      | 4.86             | 0.220              | 1.1E-02 | 3               | 18.9                |
| P52565             | Rho GDP-dissociation inhibitor 1                              | 4.81             | 0.173              | 2.3E-05 | 5               | 22.5                |
| P06733             | Alpha-enolase                                                 | 4.58             | 0.070              | 3.6E-11 | 14              | 36.2                |
| Q9UI08             | Ena/VASP-like protein                                         | 4.38             | 0.290              | 1.2E-02 | 4               | 13.9                |
| P13796             | Plastin-2                                                     | 4.29             | 0.142              | 8.8E-07 | 10              | 20.7                |
| Q06323             | Proteasome activator complex subunit 1                        | 4.27             | 0.100              | 9.5E-08 | 9               | 41.0                |
| P04439             | HLA class I histocompatibility antigen, A-3 alpha chain       | 4.23             | 0.344              | 2.8E-02 | 3               | 11.5                |
| Q9BV36             | Melanophilin                                                  | 4.13             | 0.191              | 1.4E-02 | 3               | 6.7                 |
| Q01105             | Protein SET                                                   | 4.08             | 0.152              | 4.4E-03 | 3               | 14.1                |
| P07195             | L-lactate dehydrogenase B chain                               | 4.07             | 0.068              | 6.0E-09 | 7               | 21.3                |
| Q8IV08             | Phospholipase D3                                              | 3.95             | 0.153              | 3.8E-03 | 4               | 8.4                 |
| P28838             | Cytosol aminopeptidase                                        | 3.94             | 0.133              | 4.5E-08 | 17              | 36.2                |
| P15531             | Nucleoside diphosphate kinase A                               | 3.91             | 0.107              | 1.6E-05 | 6               | 43.4                |
| Q04760             | Lactoylglutathione lyase                                      | 3.87             | 0.280              | 9.4E-03 | 3               | 14.7                |
| P07858             | Cathepsin B                                                   | 3.84             | 0.089              | 4.7E-06 | 5               | 15.9                |
| P04080             | Cystatin-B                                                    | 3.82             | 0.171              | 1.3E-02 | 3               | 39.8                |
| Q13510             | Acid ceramidase                                               | 3.76             | 0.155              | 2.7E-05 | 6               | 12.2                |
| Q9Y2S2             | Lambda-crystallin homolog                                     | 3.75             | 0.220              | 2.3E-02 | 7               | 22.3                |
| O15533             | Tapasin                                                       | 3.67             | 0.146              | 7.5E-04 | 3               | 6.7                 |
| P04406             | Glyceraldehyde-3-phosphate dehydrogenase                      | 3.64             | 0.064              | 2.2E-10 | 8               | 30.4                |
| Q03518             | Antigen peptide transporter 1                                 | 3.64             | 0.303              | 2.2E-02 | 5               | 7.2                 |
| P06865             | Beta-hexosaminidase subunit alpha                             | 3.61             | 0.166              | 2.3E-02 | 3               | 5.1                 |
| P50395             | Rab GDP dissociation inhibitor beta                           | 3.60             | 0.145              | 7.6E-04 | 6               | 16.4                |
| P63241             | Eukaryotic translation initiation factor 5A-1                 | 3.60             | 0.229              | 1.5E-02 | 5               | 30.5                |
| O14818             | Proteasome subunit alpha type-7                               | 3.53             | 0.146              | 2.8E-03 | 6               | 23.8                |
| P20618             | Proteasome subunit beta type-1                                | 3.48             | 0.161              | 6.5E-05 | 4               | 21.6                |
| P06744             | Glucose-6-phosphate isomerase                                 | 3.44             | 0.249              | 5.6E-03 | 7               | 14.7                |
| P61204             | ADP-ribosylation factor 3                                     | 3.37             | 0.176              | 5.5E-03 | 3               | 17.7                |
| Q96KP4             | Cytosolic non-specific dipeptidase                            | 3.34             | 0.093              | 3.0E-05 | 6               | 16.0                |
| P08758             | Annexin A5                                                    | 3.31             | 0.054              | 1.3E-15 | 10              | 31.3                |
| P63104             | 14-3-3 protein zeta/delta                                     | 3.28             | 0.112              | 1.3E-05 | 5               | 26.5                |
| P14618             | Pyruvate kinase PKM                                           | 3.27             | 0.083              | 1.0E-09 | 12              | 25.0                |
| Q86UX7             | Fermitin family homolog 3                                     | 3.26             | 0.279              | 2.0E-02 | 4               | 9.1                 |
| P60842             | Eukaryotic initiation factor 4A-1                             | 3.25             | 0.110              | 4.9E-05 | 5               | 14.5                |
| O15400             | Syntaxin-7                                                    | 3.24             | 0.081              | 1.6E-04 | 4               | 17.2                |
| P23526             | Adenosylhomocysteinase                                        | 3.21             | 0.195              | 4.6E-04 | 8               | 21.1                |
| Q13185             | Chromobox protein homolog 3                                   | 3.19             | 0.213              | 1.7E-02 | 3               | 18.0                |
| P40967             | Melanocyte protein PMEL                                       | 3.17             | 0.143              | 9.6E-06 | 3               | 4.7                 |
| O75874             | Isocitrate dehydrogenase [NADP] cytoplasmic                   | 3.17             | 0.133              | 2.2E-03 | 5               | 11.8                |
| P07686             | Beta-hexosaminidase subunit beta                              | 3.16             | 0.140              | 4.9E-04 | 5               | 7.7                 |
| P08670             | Vimentin                                                      | 3.12             | 0.038              | 0.0E+00 | 25              | 50.9                |
| Q99497             | Protein DJ-1                                                  | 3.10             | 0.124              | 1.0E-03 | 5               | 24.3                |
| Q9Y3Z3             | Deoxynucleoside triphosphate triphosphohydrolase SAMHD1       | 3.08             | 0.067              | 5.0E-09 | 9               | 18.1                |
| P02768             | Serum albumin                                                 | 3.07             | 0.039              | 0.0E+00 | 37              | 52.7                |
| P07900             | Heat shock protein HSP 90-alpha                               | 3.02             | 0.049              | 2.8E-11 | 9               | 10.2                |
| P09960             | Leukotriene A-4 hydrolase                                     | 2.96             | 0.063              | 5.3E-03 | 3               | 4.3                 |
| P36543             | V-type proton ATPase subunit E 1                              | 2.96             | 0.147              | 3.6E-03 | 3               | 15.5                |
| P18669             | Phosphoglycerate mutase 1                                     | 2.94             | 0.067              | 1.5E-08 | 6               | 37.0                |
| P01903             | HLA class II histocompatibility antigen, DR alpha chain       | 2.94             | 0.086              | 3.7E-06 | 4               | 21.3                |
| P08238             | Heat shock protein HSP 90-beta                                | 2.92             | 0.112              | 1.1E-04 | 4               | 5.4                 |
| Q13638             | Spliceosome RNA helicase DDX39B                               | 2.89             | 0.183              | 2.7E-03 | 7               | 20.1                |
| P28066             | Proteasome subunit alpha type-5                               | 2.82             | 0.118              | 1.5E-05 | 3               | 21.2                |
| P19338             | Nucleolin                                                     | 2.81             | 0.074              | 2.1E-07 | 8               | 10.8                |
| P16152             | Carbonyl reductase [NADPH] 1                                  | 2.79             | 0.206              | 5.5E-03 | 4               | 20.2                |
| P13639             | Elongation factor 2                                           | 2.77             | 0.102              | 7.9E-06 | 11              | 12.7                |
| Q07955             | Serine/arginine-rich splicing factor 1                        | 2.74             | 0.147              | 6.9E-03 | 3               | 8.1                 |
| Q96AG4             | Leucine-rich repeat-containing protein 59                     | 2.74             | 0.138              | 9.4E-04 | 4               | 13.7                |
| O75083             | WD repeat-containing protein 1                                | 2.70             | 0.093              | 9.1E-07 | 4               | 6.8                 |
| P06753             | Tropomyosin alpha-3 chain                                     | 2.70             | 0.093              | 2.2E-07 | 4               | 13.0                |
| O95336             | 6-phosphogluconolactonase                                     | 2.70             | 0.190              | 1.1E-02 | 4               | 20.9                |
| P22087             | rRNA 2'-O-methyltransferase fibrillar                         | 2.64             | 0.218              | 4.6E-02 | 3               | 9.7                 |
| Q9NRV9             | Heme-binding protein 1                                        | 8.76             | NA                 | NA      | 2               | 13.8                |
| P06454             | Prothymosin alpha                                             | 7.05             | NA                 | NA      | 2               | 21.6                |
| Q15181             | Inorganic pyrophosphatase                                     | 6.67             | NA                 | NA      | 2               | 10.0                |
| O75347             | Tubulin-specific chaperone A                                  | 5.91             | NA                 | NA      | 2               | 16.7                |
| Q9UHB6             | LIM domain and actin-binding protein 1                        | 5.69             | 0.644              | 2.0E-01 | 3               | 6.6                 |
| Q9BQE5             | Apolipoprotein L2                                             | 5.46             | NA                 | NA      | 2               | 6.5                 |
| P61088             | Ubiquitin-conjugating enzyme E2 N                             | 5.38             | NA                 | NA      | 2               | 13.8                |
| O75368             | SH3 domain-binding glutamic acid-rich-like protein            | 4.98             | NA                 | NA      | 2               | 20.2                |
| P13686             | Tartrate-resistant acid phosphatase type 5                    | 4.96             | NA                 | NA      | 2               | 5.8                 |
| P55008             | Allograft inflammatory factor 1                               | 4.95             | NA                 | NA      | 2               | 15.6                |
| P30273             | High affinity immunoglobulin epsilon receptor subunit gamma   | 4.65             | NA                 | NA      | 2               | 19.8                |
| P20042             | Eukaryotic translation initiation factor 2 subunit 2          | 4.65             | NA                 | NA      | 2               | 9.9                 |
| P31939             | Bifunctional purine biosynthesis protein PURH                 | 4.48             | NA                 | NA      | 2               | 4.4                 |
| P49863             | Granzyme K                                                    | 4.18             | NA                 | NA      | 2               | 10.6                |
| P12955             | Xaa-Pro dipeptidase                                           | 4.13             | NA                 | NA      | 2               | 3.7                 |
| P07108             | Acyl-CoA-binding protein                                      | 4.04             | 0.320              | 8.9E-02 | 3               | 50.6                |
| P10599             | Thioredoxin                                                   | 4.02             | NA                 | NA      | 2               | 20.0                |
| P11766             | Alcohol dehydrogenase class-3                                 | 3.93             | NA                 | NA      | 2               | 7.0                 |
| Q13637             | Ras-related protein Rab-32                                    | 3.78             | NA                 | NA      | 2               | 10.2                |
| Q9UBR2             | Cathepsin Z                                                   | 3.71             | 0.333              | 8.6E-02 | 3               | 9.6                 |
| P30040             | Endoplasmic reticulum resident protein 29                     | 3.45             | NA                 | NA      | 2               | 7.7                 |
| P57729             | Ras-related protein Rab-38                                    | 3.44             | NA                 | NA      | 2               | 8.1                 |
| P13693             | Translationally-controlled tumor protein                      | 3.36             | NA                 | NA      | 2               | 15.7                |
| P53999             | Activated RNA polymerase II transcriptional coactivator p15   | 3.35             | NA                 | NA      | 2               | 18.9                |
| Q9Y2Q3             | Glutathione S-transferase kappa 1                             | 3.23             | NA                 | NA      | 2               | 11.5                |
| Q9BRA2             | Thioredoxin domain-containing protein 17                      | 3.18             | NA                 | NA      | 2               | 19.5                |
| Q01518             | Adenyl cyclase-associated protein 1                           | 3.16             | NA                 | NA      | 2               | 5.7                 |

Table S1-Sample UM19

|        |                                                                            |      |       |         |    |      |
|--------|----------------------------------------------------------------------------|------|-------|---------|----|------|
| P04233 | HLA class II histocompatibility antigen gamma chain                        | 3.13 | 0.271 | 8.9E-02 | 3  | 13.9 |
| P17900 | Ganglioside GM2 activator                                                  | 3.12 | NA    | NA      | 2  | 9.3  |
| P07737 | Profilin-1                                                                 | 3.09 | 0.126 | 9.2E-02 | 8  | 65.0 |
| Q9Y2X3 | Nucleolar protein 58                                                       | 3.01 | NA    | NA      | 2  | 6.4  |
| O14556 | Glyceraldehyde-3-phosphate dehydrogenase, testis-specific                  | 3.01 | NA    | NA      | 2  | 6.9  |
| O00115 | Deoxyribonuclease-2-alpha                                                  | 2.99 | NA    | NA      | 2  | 6.4  |
| P22234 | Multifunctional protein ADE2                                               | 2.93 | NA    | NA      | 2  | 4.5  |
| P17096 | High mobility group protein HMG-I/HMG-Y                                    | 2.86 | NA    | NA      | 2  | 23.4 |
| Q61A00 | Dehydrogenase/reductase SDR family member 7B                               | 2.85 | NA    | NA      | 2  | 7.1  |
| Q9Y2W1 | Thyroid hormone receptor-associated protein 3                              | 2.84 | NA    | NA      | 2  | 2.4  |
| P07741 | Adenine phosphoribosyltransferase                                          | 2.81 | NA    | NA      | 2  | 12.8 |
| Q15942 | Zyxin                                                                      | 2.79 | NA    | NA      | 2  | 5.4  |
| P46776 | 60S ribosomal protein L27a                                                 | 2.75 | NA    | NA      | 2  | 14.2 |
| P61769 | Beta-2-microglobulin                                                       | 2.69 | NA    | NA      | 2  | 16.8 |
| Q00796 | Sorbitol dehydrogenase                                                     | 2.67 | NA    | NA      | 2  | 2.8  |
| P02787 | Serotransferrin                                                            | 2.63 | 0.071 | 1.6E-12 | 20 | 30.5 |
| Q9H2U2 | Inorganic pyrophosphatase 2, mitochondrial                                 | 2.63 | NA    | NA      | 2  | 7.2  |
| P50453 | Serpin B9                                                                  | 2.60 | NA    | NA      | 2  | 8.5  |
| P06748 | Nucleophosmin                                                              | 2.57 | 0.115 | 1.8E-05 | 6  | 21.8 |
| Q15631 | Translin                                                                   | 2.57 | NA    | NA      | 2  | 11.4 |
| P55786 | Puromycin-sensitive aminopeptidase                                         | 2.53 | 0.228 | 2.6E-02 | 5  | 7.0  |
| P07339 | Cathepsin D                                                                | 2.52 | 0.098 | 2.1E-05 | 7  | 18.0 |
| P63279 | SUMO-conjugating enzyme UBC9                                               | 2.52 | NA    | NA      | 2  | 14.6 |
| E9PAV3 | Nascent polypeptide-associated complex subunit alpha, muscle-specific form | 2.49 | NA    | NA      | 2  | 1.3  |
| P25786 | Proteasome subunit alpha type-1                                            | 2.47 | 0.193 | 1.8E-02 | 5  | 16.0 |
| P25788 | Proteasome subunit alpha type-3                                            | 2.46 | 0.072 | 1.4E-03 | 3  | 10.2 |
| P58546 | Myotrophin                                                                 | 2.45 | NA    | NA      | 2  | 25.4 |
| P07910 | Heterogeneous nuclear ribonucleoproteins C1/C2                             | 2.44 | 0.085 | 1.3E-07 | 7  | 22.5 |
| P22314 | Ubiquitin-like modifier-activating enzyme 1                                | 2.43 | 0.089 | 7.7E-04 | 6  | 6.8  |
| P62750 | 60S ribosomal protein L23a                                                 | 2.40 | 0.116 | 1.4E-03 | 5  | 27.6 |
| Q63HN8 | E3 ubiquitin-protein ligase RNF213                                         | 2.39 | NA    | NA      | 2  | 0.5  |
| Q5SNT6 | WASH complex subunit FAM21B                                                | 2.36 | NA    | NA      | 2  | 2.1  |
| P05107 | Integrin beta-2                                                            | 2.36 | 0.197 | 4.1E-03 | 5  | 7.4  |
| P15121 | Aldose reductase                                                           | 2.35 | NA    | NA      | 2  | 9.2  |
| P11310 | Medium-chain specific acyl-CoA dehydrogenase, mitochondrial                | 2.33 | 0.224 | 7.1E-02 | 3  | 7.4  |
| P31153 | S-adenosylmethionine synthase isoform type-2                               | 2.31 | NA    | NA      | 2  | 7.6  |
| P09211 | Glutathione S-transferase P                                                | 2.28 | 0.174 | 3.3E-02 | 7  | 40.5 |
| Q99729 | Heterogeneous nuclear ribonucleoprotein A/B                                | 2.27 | NA    | NA      | 2  | 6.6  |
| Q06787 | Fragile X mental retardation protein 1                                     | 2.25 | NA    | NA      | 2  | 4.3  |
| P46926 | Glucosamine-6-phosphate isomerase 1                                        | 2.25 | 0.036 | 1.2E-05 | 3  | 10.0 |
| P09429 | High mobility group protein B1                                             | 2.24 | 0.086 | 1.6E-03 | 6  | 27.0 |
| P30101 | Protein disulfide-isomerase A3                                             | 2.23 | 0.054 | 2.5E-10 | 15 | 28.1 |
| O00154 | Cytosolic acyl coenzyme A thioester hydrolase                              | 2.23 | 0.194 | 2.7E-02 | 4  | 15.8 |
| P40926 | Malate dehydrogenase, mitochondrial                                        | 2.23 | 0.054 | 7.9E-08 | 10 | 32.0 |
| Q9HC38 | Glyoxalase domain-containing protein 4                                     | 2.23 | 0.215 | 1.5E-01 | 4  | 11.8 |
| O00299 | Chloride intracellular channel protein 1                                   | 2.23 | NA    | NA      | 2  | 7.5  |
| P04179 | Superoxide dismutase [Mn], mitochondrial                                   | 2.22 | 0.060 | 4.6E-04 | 6  | 23.4 |
| Q9BZZ5 | Apoptosis inhibitor 5                                                      | 2.22 | NA    | NA      | 2  | 3.4  |
| P10619 | Lysosomal protective protein                                               | 2.21 | 0.115 | 2.2E-02 | 4  | 7.7  |
| Q7Z6Z7 | E3 ubiquitin-protein ligase HUWE1                                          | 2.21 | NA    | NA      | 2  | 0.7  |
| Q9GZY8 | Mitochondrial fission factor                                               | 2.21 | NA    | NA      | 2  | 6.4  |
| Q14103 | Heterogeneous nuclear ribonucleoprotein D0                                 | 2.16 | NA    | NA      | 2  | 6.8  |
| Q9NYL4 | Peptidyl-prolyl cis-trans isomerase FKBP11                                 | 2.16 | NA    | NA      | 2  | 10.4 |
| O15145 | Actin-related protein 2/3 complex subunit 3                                | 2.16 | 0.085 | 5.2E-02 | 3  | 15.7 |
| P46940 | Ras GTPase-activating-like protein IQGAP1                                  | 2.15 | 0.112 | 4.3E-06 | 11 | 7.7  |
| P30044 | Peroxisome oxidin-5, mitochondrial                                         | 2.15 | 0.061 | 1.7E-03 | 3  | 16.8 |
| Q15907 | Ras-related protein Rab-11B                                                | 2.14 | 0.135 | 1.0E-02 | 5  | 22.5 |
| P26641 | Elongation factor 1-gamma                                                  | 2.13 | 0.097 | 1.7E-03 | 4  | 8.9  |
| P49189 | 4-Trimethylaminobutyraldehyde dehydrogenase                                | 2.13 | NA    | NA      | 2  | 3.8  |
| P62158 | Calmodulin                                                                 | 2.12 | 0.096 | 4.5E-04 | 4  | 29.5 |
| P38606 | V-type proton ATPase catalytic subunit A                                   | 2.12 | 0.137 | 1.7E-03 | 8  | 15.1 |
| P23284 | Peptidyl-prolyl cis-trans isomerase B                                      | 2.11 | 0.075 | 8.9E-05 | 10 | 38.9 |
| P61160 | Actin-related protein 2                                                    | 2.11 | 0.094 | 5.6E-05 | 7  | 23.9 |
| Q12906 | Interleukin enhancer-binding factor 3                                      | 2.10 | 0.094 | 1.0E-02 | 6  | 8.5  |
| P30740 | Leukocyte elastase inhibitor                                               | 2.10 | 0.552 | 9.1E-02 | 5  | 20.6 |
| Q15046 | Lysine-tRNA ligase                                                         | 2.08 | NA    | NA      | 2  | 3.7  |
| P31948 | Stress-induced-phosphoprotein 1                                            | 2.07 | 0.085 | 1.3E-05 | 9  | 13.3 |
| P09525 | Annexin A4                                                                 | 2.07 | 0.712 | 7.1E-03 | 9  | 21.6 |
| Q9UNH7 | Sorting nexin-6                                                            | 2.06 | 0.691 | 3.2E-01 | 3  | 3.9  |
| P33121 | Long-chain-fatty-acid-CoA ligase 1                                         | 2.06 | 0.088 | 2.1E-02 | 3  | 5.7  |
| Q9UKM9 | RNA-binding protein Raly                                                   | 2.05 | 0.034 | 2.5E-06 | 3  | 12.7 |
| P51159 | Ras-related protein Rab-27A                                                | 2.05 | 0.164 | 2.6E-02 | 3  | 15.4 |
| Q96C19 | EF-hand domain-containing protein D2                                       | 2.04 | NA    | NA      | 2  | 6.3  |
| Q13488 | V-type proton ATPase 116 kDa subunit a isoform 3                           | 2.04 | NA    | NA      | 2  | 3.5  |
| O43399 | Tumor protein D54                                                          | 2.04 | NA    | NA      | 2  | 9.2  |
| Q9BR76 | Coronin-1B                                                                 | 2.03 | NA    | NA      | 2  | 3.9  |
| P14550 | Alcohol dehydrogenase [NADP(+)]                                            | 2.03 | 0.582 | 6.5E-01 | 3  | 8.0  |
| P54819 | Adenylate kinase 2, mitochondrial                                          | 2.03 | 0.110 | 1.5E-02 | 3  | 15.5 |
| P18621 | 60S ribosomal protein L17                                                  | 2.02 | 0.196 | 5.7E-02 | 3  | 18.5 |
| Q9NYU2 | UDP-glucose:glycoprotein glucosyltransferase 1                             | 2.02 | 0.192 | 1.0E-02 | 5  | 2.8  |
| P52907 | F-actin-capping protein subunit alpha-1                                    | 2.01 | 0.079 | 6.3E-05 | 3  | 18.5 |
| P37837 | Transaldolase                                                              | 2.01 | 0.113 | 2.9E-02 | 6  | 17.5 |
| P11216 | Glycogen phosphorylase, brain form                                         | 2.01 | 0.122 | 5.9E-04 | 7  | 10.3 |
| Q9H3N1 | Thioredoxin-related transmembrane protein 1                                | 2.00 | NA    | NA      | 2  | 7.5  |
| Q9Y6C9 | Mitochondrial carrier homolog 2                                            | 1.99 | NA    | NA      | 2  | 7.3  |
| P21283 | V-type proton ATPase subunit C 1                                           | 1.99 | NA    | NA      | 2  | 4.5  |
| Q5T1M5 | FK506-binding protein 15                                                   | 1.98 | NA    | NA      | 2  | 2.1  |
| O43852 | Calumenin                                                                  | 1.97 | 0.216 | 7.7E-02 | 3  | 9.5  |
| Q15084 | Protein disulfide-isomerase A6                                             | 1.96 | 0.114 | 5.8E-03 | 7  | 20.2 |
| P59998 | Actin-related protein 2/3 complex subunit 4                                | 1.95 | 0.057 | 7.0E-04 | 3  | 16.1 |
| P31949 | Protein S100-A11                                                           | 1.94 | 0.117 | 2.9E-02 | 3  | 34.3 |
| P02766 | Transthyretin                                                              | 1.94 | NA    | NA      | 2  | 12.9 |
| P60900 | Proteasome subunit alpha type-6                                            | 1.94 | 0.344 | 2.4E-01 | 3  | 13.0 |
| Q92688 | Acidic leucine-rich nuclear phosphoprotein 32 family member B              | 1.92 | 0.317 | 9.4E-02 | 3  | 10.0 |
| P10644 | cAMP-dependent protein kinase type I-alpha regulatory subunit              | 1.92 | NA    | NA      | 2  | 5.2  |
| P51149 | Ras-related protein Rab-7a                                                 | 1.91 | 0.093 | 4.5E-03 | 3  | 16.9 |
| O75396 | Vesicle-trafficking protein SEC22b                                         | 1.91 | 0.050 | 2.8E-02 | 6  | 34.4 |
| O43776 | Asparagine-tRNA ligase, cytoplasmic                                        | 1.91 | NA    | NA      | 2  | 5.7  |
| P27797 | Calreticulin                                                               | 1.91 | 0.173 | 6.4E-04 | 10 | 20.1 |
| Q9BS26 | Endoplasmic reticulum resident protein 44                                  | 1.90 | 0.085 | 4.1E-04 | 5  | 13.1 |
| Q00765 | Receptor expression-enhancing protein 5                                    | 1.90 | 0.080 | 1.4E-02 | 3  | 10.6 |
| Q02818 | Nucleobindin-1                                                             | 1.89 | 0.181 | 1.4E-02 | 3  | 8.9  |
| Q9NP81 | Serine-tRNA ligase, mitochondrial                                          | 1.88 | NA    | NA      | 2  | 6.9  |
| Q9P2E9 | Ribosome-binding protein 1                                                 | 1.87 | 0.092 | 2.3E-04 | 8  | 7.0  |
| P62263 | 40S ribosomal protein S14                                                  | 1.87 | 0.126 | 3.1E-03 | 4  | 36.4 |
| P39687 | Acidic leucine-rich nuclear phosphoprotein 32 family member A              | 1.87 | 0.301 | 1.1E-01 | 4  | 14.5 |
| Q13576 | Ras GTPase-activating-like protein IQGAP2                                  | 1.86 | 0.190 | 2.6E-01 | 3  | 1.9  |
| Q99798 | Aconitate hydratase, mitochondrial                                         | 1.86 | 0.100 | 6.9E-04 | 8  | 13.2 |
| P30504 | HLA class I histocompatibility antigen, Cw-4 alpha chain                   | 1.86 | NA    | NA      | 2  | 7.7  |
| P07602 | Prosaposin                                                                 | 1.86 | 0.147 | 9.6E-02 | 4  | 6.9  |
| P61604 | 10 kDa heat shock protein, mitochondrial                                   | 1.85 | 0.133 | 1.4E-03 | 5  | 49.0 |
| P01859 | Ig gamma-2 chain C region                                                  | 1.85 | 0.088 | 5.2E-03 | 3  | 12.0 |
| P21281 | V-type proton ATPase subunit B, brain isoform                              | 1.85 | 0.087 | 1.6E-03 | 6  | 11.7 |
| P26038 | Moesin                                                                     | 1.84 | 0.097 | 5.3E-04 | 9  | 15.3 |
| P14317 | Hematopoietic lineage cell-specific protein                                | 1.84 | 0.108 | 8.0E-03 | 5  | 12.6 |

Table S1-Sample UM19

|        |                                                                             |      |       |         |    |      |
|--------|-----------------------------------------------------------------------------|------|-------|---------|----|------|
| P30042 | ES1 protein homolog, mitochondrial                                          | 1.83 | NA    | NA      | 2  | 11.2 |
| P30837 | Aldehyde dehydrogenase X, mitochondrial                                     | 1.82 | 0.095 | 4.1E-04 | 5  | 14.1 |
| Q86VP6 | Cullin-associated NEDD8-dissociated protein 1                               | 1.80 | 0.126 | 1.9E-01 | 4  | 3.3  |
| Q99523 | Sortilin                                                                    | 1.80 | 0.073 | 3.1E-02 | 4  | 6.3  |
| P08575 | Receptor-type tyrosine-protein phosphatase C                                | 1.80 | 0.071 | 1.7E-04 | 8  | 7.1  |
| P15311 | Ezrin                                                                       | 1.79 | 0.084 | 6.5E-04 | 6  | 8.7  |
| P00338 | L-lactate dehydrogenase A chain                                             | 1.79 | 0.262 | 3.3E-03 | 9  | 25.0 |
| P54136 | Arginine-tRNA ligase, cytoplasmic                                           | 1.79 | 0.071 | 1.1E-03 | 4  | 7.4  |
| Q5SSJ5 | Heterochromatin protein 1-binding protein 3                                 | 1.79 | 0.572 | 2.6E-01 | 3  | 6.1  |
| Q12905 | Interleukin enhancer-binding factor 2                                       | 1.77 | 0.212 | 1.0E-02 | 3  | 9.5  |
| Q13423 | NAD(P) transhydrogenase, mitochondrial                                      | 1.77 | 0.099 | 2.4E-04 | 5  | 5.2  |
| P28065 | Proteasome subunit beta type-9                                              | 1.77 | 0.329 | 4.7E-01 | 3  | 14.2 |
| P60981 | Dextrin                                                                     | 1.76 | 0.078 | 1.7E-02 | 3  | 17.0 |
| P14974 | Importin subunit beta-1                                                     | 1.76 | 0.029 | 1.1E-02 | 4  | 7.2  |
| Q9H3G5 | Probable serine carboxypeptidase CPVL                                       | 1.76 | 0.083 | 8.5E-03 | 3  | 6.9  |
| Q9UKV3 | Apoptotic chromatin condensation inducer in the nucleus                     | 1.76 | NA    | NA      | 2  | 1.7  |
| P13797 | Plastin-3                                                                   | 1.75 | NA    | NA      | 2  | 4.0  |
| Q5VTE0 | Putative elongation factor 1-alpha-like 3                                   | 1.75 | 0.127 | 1.3E-03 | 9  | 19.9 |
| P37802 | Transgelin-2                                                                | 1.73 | 0.240 | 6.2E-02 | 3  | 14.6 |
| P99999 | Cytochrome c                                                                | 1.73 | 0.104 | 1.4E-02 | 3  | 24.8 |
| O14773 | Tripeptidyl-peptidase 1                                                     | 1.72 | 0.108 | 1.6E-03 | 4  | 8.7  |
| Q9ULV4 | Coronin-1C                                                                  | 1.72 | NA    | NA      | 2  | 4.9  |
| P48735 | Isocitrate dehydrogenase [NADP], mitochondrial                              | 1.72 | 0.119 | 3.8E-04 | 7  | 15.3 |
| P25398 | 40S ribosomal protein S12                                                   | 1.71 | 0.081 | 2.9E-04 | 3  | 22.0 |
| O75390 | Citrate synthase, mitochondrial                                             | 1.71 | 0.143 | 2.8E-01 | 5  | 12.2 |
| Q04637 | Eukaryotic translation initiation factor 4 gamma 1                          | 1.71 | NA    | NA      | 2  | 1.9  |
| P30533 | Alpha-2-macroglobulin receptor-associated protein                           | 1.69 | NA    | NA      | 2  | 6.2  |
| P26599 | Polypyrimidine tract-binding protein 1                                      | 1.68 | 0.184 | 8.4E-03 | 4  | 5.8  |
| Q86UE4 | Protein LYRIC                                                               | 1.68 | NA    | NA      | 2  | 4.0  |
| O43488 | Aflatoxin B1 aldehyde reductase member 2                                    | 1.68 | NA    | NA      | 2  | 5.3  |
| P10412 | Histone H1.4                                                                | 1.67 | 0.078 | 2.5E-03 | 5  | 15.5 |
| O15143 | Actin-related protein 2/3 complex subunit 1B                                | 1.67 | 0.163 | 8.1E-03 | 5  | 17.5 |
| P07237 | Protein disulfide-isomerase                                                 | 1.66 | 0.069 | 3.4E-03 | 12 | 23.2 |
| P62330 | ADP-ribosylation factor 6                                                   | 1.66 | NA    | NA      | 2  | 14.9 |
| Q8NC51 | Plasminogen activator inhibitor 1 RNA-binding protein                       | 1.66 | NA    | NA      | 2  | 6.9  |
| P78347 | General transcription factor II-I                                           | 1.65 | 0.273 | 2.3E-01 | 3  | 3.4  |
| Q06830 | Peroxisomal protein                                                         | 1.65 | 0.071 | 1.5E-04 | 9  | 47.7 |
| P62424 | 60S ribosomal protein L7a                                                   | 1.65 | 0.083 | 9.8E-02 | 4  | 16.9 |
| Q5JRX3 | Presequence protease, mitochondrial                                         | 1.65 | NA    | NA      | 2  | 2.4  |
| O76021 | Ribosomal L1 domain-containing protein 1                                    | 1.64 | NA    | NA      | 2  | 4.3  |
| P17643 | 5,6-dihydroxyindole-2-carboxylic acid oxidase                               | 1.64 | 0.178 | 2.7E-02 | 6  | 13.6 |
| P49591 | Serine-tRNA ligase, cytoplasmic                                             | 1.64 | 0.102 | 1.1E-03 | 3  | 7.0  |
| P49755 | Transmembrane emp24 domain-containing protein 10                            | 1.64 | NA    | NA      | 2  | 7.3  |
| O15144 | Actin-related protein 2/3 complex subunit 2                                 | 1.63 | 0.101 | 1.2E-02 | 3  | 9.0  |
| Q14165 | Malectin                                                                    | 1.63 | NA    | NA      | 2  | 5.5  |
| Q00839 | Heterogeneous nuclear ribonucleoprotein U                                   | 1.63 | 0.181 | 2.6E-02 | 8  | 10.9 |
| P00352 | Retinal dehydrogenase 1                                                     | 1.62 | 0.065 | 5.0E-06 | 8  | 17.0 |
| P63000 | Ras-related C3 botulinum toxin substrate 1                                  | 1.62 | NA    | NA      | 2  | 15.1 |
| Q15691 | Microtubule-associated protein RP/EB family member 1                        | 1.62 | 0.167 | 7.0E-02 | 3  | 9.0  |
| P36578 | 60S ribosomal protein L4                                                    | 1.62 | 0.083 | 9.4E-04 | 5  | 13.8 |
| Q8N5K1 | CDGSH iron-sulfur domain-containing protein 2                               | 1.60 | 0.204 | 3.9E-02 | 5  | 31.9 |
| P52597 | Heterogeneous nuclear ribonucleoprotein F                                   | 1.60 | NA    | NA      | 2  | 7.0  |
| P04075 | Fructose-bisphosphate aldolase A                                            | 1.59 | 0.053 | 4.0E-06 | 12 | 42.3 |
| P38159 | RNA-binding motif protein, X chromosome                                     | 1.59 | 1.019 | 5.0E-01 | 3  | 9.0  |
| P08865 | 40S ribosomal protein SA                                                    | 1.59 | NA    | NA      | 2  | 9.5  |
| P15153 | Ras-related C3 botulinum toxin substrate 2                                  | 1.59 | NA    | NA      | 2  | 14.6 |
| Q96D96 | Voltage-gated hydrogen channel 1                                            | 1.58 | NA    | NA      | 2  | 9.5  |
| P09669 | Cytochrome c oxidase subunit 6C                                             | 1.57 | NA    | NA      | 2  | 22.7 |
| P62857 | 40S ribosomal protein S28                                                   | 1.57 | NA    | NA      | 2  | 30.4 |
| Q14247 | Src substrate cactin                                                        | 1.57 | NA    | NA      | 2  | 3.5  |
| Q99873 | Protein arginine N-methyltransferase 1                                      | 1.57 | NA    | NA      | 2  | 6.4  |
| Q9NQP4 | Prefoldin subunit 4                                                         | 1.56 | NA    | NA      | 2  | 17.9 |
| P62851 | 40S ribosomal protein S25                                                   | 1.56 | 0.067 | 1.1E-03 | 4  | 24.0 |
| Q86V81 | THO complex subunit 4                                                       | 1.56 | NA    | NA      | 2  | 8.2  |
| P30048 | Thioredoxin-dependent peroxide reductase, mitochondrial                     | 1.55 | 0.062 | 1.5E-03 | 4  | 19.5 |
| Q07960 | Rho GTPase-activating protein 1                                             | 1.55 | 0.140 | 1.9E-01 | 4  | 9.3  |
| P46778 | 60S ribosomal protein L21                                                   | 1.54 | NA    | NA      | 2  | 13.8 |
| Q92890 | Ubiquitin fusion degradation protein 1 homolog                              | 1.54 | NA    | NA      | 2  | 7.5  |
| Q14152 | Eukaryotic translation initiation factor 3 subunit A                        | 1.53 | 0.149 | 3.2E-02 | 5  | 4.8  |
| P61978 | Heterogeneous nuclear ribonucleoprotein K                                   | 1.53 | 0.104 | 4.9E-04 | 14 | 33.7 |
| Q01130 | Serine/arginine-rich splicing factor 2                                      | 1.53 | NA    | NA      | 2  | 10.9 |
| Q15366 | Poly(C)-binding protein 2                                                   | 1.52 | NA    | NA      | 2  | 10.1 |
| P09622 | Dihydrolipoyl dehydrogenase, mitochondrial                                  | 1.52 | 0.153 | 2.5E-01 | 6  | 12.8 |
| Q9Y411 | Unconventional myosin-Va                                                    | 1.52 | NA    | NA      | 2  | 1.0  |
| A1L0T0 | Acetolactate synthase-like protein                                          | 1.52 | 0.161 | 1.4E-01 | 3  | 6.0  |
| P62136 | Serine/threonine-protein phosphatase PP1-alpha catalytic subunit            | 1.52 | 0.186 | 8.9E-02 | 3  | 9.1  |
| Q16531 | DNA damage-binding protein 1                                                | 1.51 | 0.112 | 5.7E-02 | 4  | 3.4  |
| P51812 | Ribosomal protein S6 kinase alpha-3                                         | 1.51 | 0.234 | 2.7E-01 | 3  | 5.0  |
| P14868 | Aspartate-tRNA ligase, cytoplasmic                                          | 1.51 | 0.097 | 8.9E-03 | 4  | 10.0 |
| Q08211 | ATP-dependent RNA helicase A                                                | 1.51 | 0.047 | 1.6E-03 | 5  | 4.4  |
| P51991 | Heterogeneous nuclear ribonucleoprotein A3                                  | 1.51 | 0.072 | 1.4E-03 | 5  | 14.6 |
| P13667 | Protein disulfide-isomerase A4                                              | 1.50 | 0.214 | 5.6E-02 | 6  | 9.5  |
| P61019 | Ras-related protein Rab-2A                                                  | 1.50 | 0.154 | 7.2E-02 | 3  | 18.4 |
| Q08379 | Golgin subfamily A member 2                                                 | 1.49 | NA    | NA      | 2  | 2.0  |
| P27348 | 14-3-3 protein theta                                                        | 1.49 | 0.045 | 2.6E-02 | 4  | 15.9 |
| P61158 | Actin-related protein 3                                                     | 1.49 | 0.157 | 3.8E-02 | 6  | 17.7 |
| P51810 | G-protein coupled receptor 143                                              | 1.49 | 0.132 | 1.6E-01 | 3  | 9.9  |
| P01857 | Ig gamma-1 chain C region                                                   | 1.49 | 0.048 | 4.7E-06 | 4  | 17.9 |
| P29692 | Elongation factor 1-delta                                                   | 1.48 | 0.068 | 1.4E-02 | 3  | 13.9 |
| P62191 | 26S protease regulatory subunit 4                                           | 1.48 | NA    | NA      | 2  | 5.2  |
| O00160 | Unconventional myosin-If                                                    | 1.47 | NA    | NA      | 2  | 1.5  |
| P62258 | 14-3-3 protein epsilon                                                      | 1.46 | 0.081 | 2.2E-03 | 7  | 30.6 |
| P61026 | Ras-related protein Rab-10                                                  | 1.46 | NA    | NA      | 2  | 9.5  |
| Q9Y6N5 | Sulfide:quinone oxidoreductase, mitochondrial                               | 1.46 | 0.077 | 8.3E-04 | 5  | 12.2 |
| P43686 | 26S protease regulatory subunit 6B                                          | 1.46 | 0.096 | 7.3E-02 | 3  | 8.4  |
| Q07666 | KH domain-containing, RNA-binding, signal transduction-associated protein 1 | 1.46 | NA    | NA      | 2  | 5.2  |
| P29728 | 2'-5'-oligoadenylate synthase 2                                             | 1.46 | 0.176 | 1.9E-01 | 3  | 5.7  |
| P62249 | 40S ribosomal protein S16                                                   | 1.45 | NA    | NA      | 2  | 15.8 |
| Q99536 | Synaptic vesicle membrane protein VAT-1 homolog                             | 1.45 | 0.070 | 3.5E-03 | 9  | 27.0 |
| P11586 | C-1-tetrahydrofolate synthase, cytoplasmic                                  | 1.45 | 0.060 | 5.8E-04 | 6  | 7.6  |
| Q3SY69 | Mitochondrial 10-formyltetrahydrofolate dehydrogenase                       | 1.45 | NA    | NA      | 2  | 2.3  |
| P26373 | 60S ribosomal protein L13                                                   | 1.45 | 0.139 | 1.7E-02 | 3  | 15.2 |
| P12270 | Nucleoprotein TPR                                                           | 1.45 | 0.045 | 1.7E-02 | 4  | 2.4  |
| P09651 | Heterogeneous nuclear ribonucleoprotein A1                                  | 1.45 | 0.076 | 2.8E-03 | 6  | 20.7 |
| P30519 | Heme oxygenase 2                                                            | 1.44 | 0.111 | 6.5E-02 | 4  | 18.7 |
| O95292 | Vesicle-associated membrane protein-associated protein B/C                  | 1.44 | 0.235 | 2.5E-01 | 3  | 18.9 |
| P21796 | Voltage-dependent anion-selective channel protein 1                         | 1.44 | 0.101 | 2.1E-03 | 8  | 33.2 |
| Q9Y608 | Leucine-rich repeat flightless-interacting protein 2                        | 1.43 | NA    | NA      | 2  | 2.8  |
| Q09028 | Histone-binding protein RBBP4                                               | 1.43 | NA    | NA      | 2  | 8.2  |
| Q1KMD3 | Heterogeneous nuclear ribonucleoprotein U-like protein 2                    | 1.43 | 0.162 | 7.3E-02 | 4  | 5.2  |
| P14314 | Glucoosidase 2 subunit beta                                                 | 1.43 | 1.244 | 1.8E-01 | 9  | 16.3 |
| P17931 | Galectin-3                                                                  | 1.41 | 0.090 | 2.0E-03 | 7  | 30.8 |
| P26640 | Valine-tRNA ligase                                                          | 1.40 | NA    | NA      | 2  | 2.1  |
| Q9Y266 | Nuclear migration protein nudC                                              | 1.40 | NA    | NA      | 2  | 9.1  |
| Q99805 | Transmembrane 9 superfamily member 2                                        | 1.39 | 0.260 | 2.2E-01 | 3  | 4.2  |

Table S1-Sample UM19

|        |                                                                          |      |        |         |    |      |
|--------|--------------------------------------------------------------------------|------|--------|---------|----|------|
| P22626 | Heterogeneous nuclear ribonucleoproteins A2/B1                           | 1.39 | 0.117  | 3.5E-03 | 12 | 31.7 |
| P11142 | Heat shock cognate 71 kDa protein                                        | 1.39 | 0.143  | 7.6E-03 | 10 | 16.7 |
| Q92556 | Engulfment and cell motility protein 1                                   | 1.39 | 0.218  | 2.1E-01 | 3  | 5.0  |
| Q9UHX1 | Poly(U)-binding-splicing factor PUF60                                    | 1.39 | NA     | NA      | 2  | 3.2  |
| Q95881 | Thioredoxin domain-containing protein 12                                 | 1.38 | NA     | NA      | 2  | 14.0 |
| P17844 | Probable ATP-dependent RNA helicase DDX5                                 | 1.38 | 0.150  | 4.6E-02 | 4  | 7.7  |
| Q13217 | DnaJ homolog subfamily C member 3                                        | 1.38 | NA     | NA      | 2  | 3.8  |
| P09874 | Poly [ADP-ribose] polymerase 1                                           | 1.38 | 0.136  | 1.7E-02 | 7  | 7.7  |
| Q15029 | 116 kDa U5 small nuclear ribonucleoprotein component                     | 1.38 | 0.090  | 1.5E-01 | 3  | 3.7  |
| Q13596 | Sorting nexin-1                                                          | 1.37 | 0.056  | 1.5E-01 | 3  | 7.1  |
| Q9NYU1 | UDP-glucose:glycoprotein glucosyltransferase 2                           | 1.37 | NA     | NA      | 2  | 1.1  |
| P30050 | 60S ribosomal protein L12                                                | 1.37 | 0.131  | 9.5E-02 | 6  | 54.5 |
| Q5JTV8 | Torsin-1A-interacting protein 1                                          | 1.37 | NA     | NA      | 2  | 4.5  |
| P62906 | 60S ribosomal protein L10a                                               | 1.37 | 0.173  | 3.9E-02 | 6  | 27.6 |
| P30084 | Enoyl-CoA hydratase, mitochondrial                                       | 1.36 | 0.290  | 1.3E-01 | 4  | 13.1 |
| Q9Y4W6 | AFG3-like protein 2                                                      | 1.36 | 0.099  | 1.2E-01 | 4  | 4.6  |
| P13010 | X-ray repair cross-complementing protein 5                               | 1.36 | 0.110  | 1.2E-01 | 6  | 11.1 |
| P19367 | Hexokinase-1                                                             | 1.36 | 0.110  | 2.2E-02 | 5  | 6.1  |
| P50454 | Serpin H1                                                                | 1.36 | 0.334  | 2.8E-01 | 4  | 11.7 |
| P05155 | Plasma protease C1 inhibitor                                             | 1.36 | NA     | NA      | 2  | 4.6  |
| P35998 | 26S protease regulatory subunit 7                                        | 1.36 | 0.114  | 1.8E-01 | 3  | 8.3  |
| P62826 | GTP-binding nuclear protein Ran                                          | 1.35 | NA     | NA      | 2  | 13.9 |
| P15880 | 40S ribosomal protein S2                                                 | 1.35 | 0.099  | 4.2E-02 | 4  | 16.0 |
| P05387 | 60S acidic ribosomal protein P2                                          | 1.34 | 0.081  | 1.3E-02 | 5  | 32.2 |
| P51572 | B-cell receptor-associated protein 31                                    | 1.34 | 0.144  | 9.7E-02 | 5  | 22.0 |
| P27635 | 60S ribosomal protein L10                                                | 1.34 | 0.081  | 2.9E-01 | 3  | 15.9 |
| P16070 | CD44 antigen                                                             | 1.34 | 0.214  | 5.4E-01 | 8  | 10.0 |
| O60506 | Heterogeneous nuclear ribonucleoprotein Q                                | 1.34 | 3.880  | 5.3E-01 | 3  | 5.6  |
| P50213 | Isocitrate dehydrogenase [NAD] subunit alpha, mitochondrial              | 1.34 | 0.132  | 4.8E-02 | 4  | 11.5 |
| Q15121 | Astrocytic phosphoprotein PEA-15                                         | 1.34 | NA     | NA      | 2  | 17.7 |
| P36776 | Lon protease homolog, mitochondrial                                      | 1.34 | NA     | NA      | 2  | 2.4  |
| Q92597 | Protein NDRG1                                                            | 1.34 | NA     | NA      | 2  | 7.6  |
| P0CW22 | 40S ribosomal protein S17-like                                           | 1.33 | NA     | NA      | 2  | 15.6 |
| P62241 | 40S ribosomal protein S8                                                 | 1.33 | 0.122  | 6.4E-02 | 4  | 15.4 |
| O60749 | Sorting nexin-2                                                          | 1.33 | NA     | NA      | 2  | 5.0  |
| P22059 | Oxysterol-binding protein 1                                              | 1.32 | NA     | NA      | 2  | 2.9  |
| Q16666 | Gamma-interferon-inducible protein 16                                    | 1.32 | 0.028  | 4.2E-02 | 3  | 4.1  |
| P60953 | Cell division control protein 42 homolog                                 | 1.32 | NA     | NA      | 2  | 11.0 |
| P62753 | 40S ribosomal protein S6                                                 | 1.31 | 0.182  | 1.1E-01 | 4  | 16.5 |
| Q99614 | Tetrapeptide repeat protein 1                                            | 1.31 | NA     | NA      | 2  | 10.3 |
| P14854 | Cytochrome c oxidase subunit 6B1                                         | 1.30 | 0.156  | 2.2E-01 | 3  | 24.4 |
| Q9NQ39 | Putative 40S ribosomal protein S10-like                                  | 1.30 | NA     | NA      | 2  | 13.6 |
| Q96TC7 | Regulator of microtubule dynamics protein 3                              | 1.30 | 0.188  | 1.2E-01 | 3  | 7.7  |
| P61421 | V-type proton ATPase subunit d 1                                         | 1.30 | 0.091  | 3.9E-02 | 3  | 7.7  |
| P34932 | Heat shock 70 kDa protein 4                                              | 1.29 | 0.037  | 8.2E-03 | 6  | 7.5  |
| Q16836 | Hydroxyacyl-coenzyme A dehydrogenase, mitochondrial                      | 1.29 | NA     | NA      | 2  | 6.1  |
| P43490 | Nicotinamide phosphoribosyltransferase                                   | 1.29 | 0.439  | 6.0E-01 | 4  | 7.3  |
| P00441 | Superoxide dismutase [Cu-Zn]                                             | 1.28 | NA     | NA      | 2  | 13.0 |
| Q13162 | Peroxisomal protein 4                                                    | 1.28 | NA     | NA      | 2  | 8.9  |
| P12956 | X-ray repair cross-complementing protein 6                               | 1.27 | 0.120  | 7.6E-02 | 7  | 11.0 |
| P11021 | 78 kDa glucose-regulated protein                                         | 1.27 | 0.043  | 8.1E-05 | 22 | 30.7 |
| O75367 | Core histone macro-H2A.1                                                 | 1.27 | 1.860  | 1.7E-01 | 8  | 22.0 |
| P11387 | DNA topoisomerase 1                                                      | 1.26 | NA     | NA      | 2  | 2.7  |
| Q95202 | LETM1 and EF-hand domain-containing protein 1, mitochondrial             | 1.26 | 0.263  | 2.3E-01 | 3  | 5.3  |
| Q9Y4L1 | Hypoxia up-regulated protein 1                                           | 1.26 | NA     | NA      | 2  | 2.2  |
| P54727 | UV excision repair protein RAD23 homolog B                               | 1.26 | 0.148  | 7.8E-02 | 4  | 9.3  |
| Q92945 | Far upstream element-binding protein 2                                   | 1.26 | 0.311  | 3.9E-01 | 4  | 7.5  |
| P31040 | Succinate dehydrogenase [ubiquinone] flavoprotein subunit, mitochondrial | 1.26 | 0.108  | 1.9E-01 | 6  | 12.3 |
| P23246 | Splicing factor, proline- and glutamine-rich                             | 1.25 | 0.780  | 2.0E-01 | 5  | 8.5  |
| P08195 | 4F2 cell-surface antigen heavy chain                                     | 1.25 | 0.107  | 3.5E-02 | 5  | 9.7  |
| P26368 | Splicing factor U2AF 65 kDa subunit                                      | 1.25 | NA     | NA      | 2  | 3.8  |
| P84103 | Serine/arginine-rich splicing factor 3                                   | 1.24 | NA     | NA      | 2  | 18.9 |
| P38117 | Electron transfer flavoprotein subunit beta                              | 1.24 | 6.341  | 3.2E-01 | 6  | 20.0 |
| P08237 | ATP-dependent 6-phosphofructokinase, muscle type                         | 1.23 | NA     | NA      | 2  | 3.6  |
| P47756 | F-actin-capping protein subunit beta                                     | 1.23 | 0.095  | 2.9E-02 | 7  | 24.5 |
| Q9NZ08 | Endoplasmic reticulum aminopeptidase 1                                   | 1.23 | NA     | NA      | 2  | 1.6  |
| O75306 | NADH dehydrogenase [ubiquinone] iron-sulfur protein 2, mitochondrial     | 1.23 | NA     | NA      | 2  | 4.3  |
| Q14558 | Phosphoribosyl pyrophosphate synthase-associated protein 1               | 1.22 | NA     | NA      | 2  | 8.4  |
| P61353 | 60S ribosomal protein L27                                                | 1.22 | NA     | NA      | 2  | 22.1 |
| P62979 | Ubiquitin-40S ribosomal protein S27a                                     | 1.22 | 0.331  | 4.8E-01 | 8  | 41.7 |
| Q15393 | Splicing factor 3B subunit 3                                             | 1.22 | NA     | NA      | 2  | 2.5  |
| P78371 | T-complex protein 1 subunit beta                                         | 1.22 | 0.136  | 1.9E-01 | 7  | 14.8 |
| P27816 | Microtubule-associated protein 4                                         | 1.22 | 0.290  | 3.6E-01 | 4  | 4.3  |
| P38646 | Stress-70 protein, mitochondrial                                         | 1.22 | 0.183  | 3.0E-02 | 11 | 19.7 |
| Q9H0U4 | Ras-related protein Rab-1B                                               | 1.22 | NA     | NA      | 2  | 10.9 |
| O00231 | 26S proteasome non-ATPase regulatory subunit 11                          | 1.21 | 0.658  | 3.9E-01 | 6  | 16.1 |
| P17858 | ATP-dependent 6-phosphofructokinase, liver type                          | 1.21 | 0.471  | 2.7E-01 | 4  | 4.6  |
| Q15008 | 26S proteasome non-ATPase regulatory subunit 6                           | 1.21 | NA     | NA      | 2  | 5.9  |
| Q96GK7 | Fumarylacetoacetate hydrolase domain-containing protein 2A               | 1.21 | NA     | NA      | 2  | 9.6  |
| P02652 | Apolipoprotein A-II                                                      | 1.20 | 0.182  | 4.2E-01 | 3  | 19.0 |
| Q9UBS4 | DnaJ homolog subfamily B member 11                                       | 1.20 | NA     | NA      | 2  | 6.4  |
| P40763 | Signal transducer and activator of transcription 3                       | 1.20 | 0.655  | 4.1E-01 | 6  | 11.2 |
| Q15293 | Reticulocalbin-1                                                         | 1.20 | 0.039  | 4.7E-02 | 4  | 11.2 |
| Q8N163 | Cell cycle and apoptosis regulator protein 2                             | 1.19 | NA     | NA      | 2  | 3.0  |
| P18124 | 60S ribosomal protein L7                                                 | 1.19 | 0.109  | 6.4E-02 | 4  | 12.1 |
| P60866 | 40S ribosomal protein S20                                                | 1.19 | 0.519  | 5.0E-01 | 3  | 25.2 |
| P13073 | Cytochrome c oxidase subunit 4 isoform 1, mitochondrial                  | 1.19 | 0.116  | 3.8E-01 | 4  | 25.4 |
| Q9NSE4 | Isoleucine-tRNA ligase, mitochondrial                                    | 1.19 | 0.106  | 2.4E-01 | 3  | 4.2  |
| P08134 | Rho-related GTP-binding protein RhoC                                     | 1.19 | 0.209  | 3.2E-01 | 3  | 10.4 |
| P39019 | 40S ribosomal protein S19                                                | 1.19 | 1.729  | 7.2E-01 | 6  | 31.0 |
| Q6UVK1 | Chondroitin sulfate proteoglycan 4                                       | 1.19 | NA     | NA      | 2  | 1.4  |
| Q14697 | Neutral alpha-glucosidase AB                                             | 1.18 | 0.247  | 1.9E-01 | 16 | 20.2 |
| Q16698 | 2,4-dienoyl-CoA reductase, mitochondrial                                 | 1.18 | NA     | NA      | 2  | 9.3  |
| B5ME19 | Eukaryotic translation initiation factor 3 subunit C-like protein        | 1.18 | 0.089  | 8.3E-02 | 5  | 5.3  |
| P05388 | 60S acidic ribosomal protein P0                                          | 1.18 | 0.151  | 3.1E-01 | 4  | 12.0 |
| Q6IAA8 | Regulator complex protein LAMTOR1                                        | 1.18 | NA     | NA      | 2  | 16.8 |
| Q14683 | Structural maintenance of chromosomes protein 1A                         | 1.17 | 0.385  | 3.4E-01 | 3  | 2.8  |
| P35606 | Coatomer subunit beta'                                                   | 1.17 | 14.906 | 6.8E-01 | 3  | 3.2  |
| P01834 | Ig kappa chain C region                                                  | 1.17 | 0.221  | 2.3E-01 | 3  | 46.2 |
| P10809 | 60 kDa heat shock protein, mitochondrial                                 | 1.17 | 0.112  | 2.2E-01 | 12 | 24.1 |
| P29590 | Protein PML                                                              | 1.16 | 0.169  | 4.8E-01 | 5  | 6.6  |
| P02746 | Complement C1q subcomponent subunit B                                    | 1.16 | 12.416 | 4.4E-01 | 3  | 15.0 |
| Q9ULA0 | Aspartyl aminopeptidase                                                  | 1.16 | NA     | NA      | 2  | 5.1  |
| P11717 | Cation-independent mannose-6-phosphate receptor                          | 1.16 | NA     | NA      | 2  | 1.0  |
| P52272 | Heterogeneous nuclear ribonucleoprotein M                                | 1.15 | 0.375  | 1.7E-01 | 7  | 11.9 |
| O75844 | CAAX prenyl protease 1 homolog                                           | 1.15 | NA     | NA      | 2  | 3.8  |
| P11940 | Polyadenylate-binding protein 1                                          | 1.14 | 0.356  | 3.0E-01 | 7  | 12.3 |
| Q7L5N1 | COP9 signalosome complex subunit 6                                       | 1.14 | NA     | NA      | 2  | 8.0  |
| O00303 | Eukaryotic translation initiation factor 3 subunit F                     | 1.14 | NA     | NA      | 2  | 7.3  |
| Q43837 | Isocitrate dehydrogenase [NAD] subunit beta, mitochondrial               | 1.14 | NA     | NA      | 2  | 5.5  |
| O75643 | U5 small nuclear ribonucleoprotein 200 kDa helicase                      | 1.14 | NA     | NA      | 2  | 0.9  |
| Q02218 | 2-oxoglutarate dehydrogenase, mitochondrial                              | 1.14 | 0.462  | 1.6E-01 | 8  | 9.4  |
| Q86UP2 | Kinectin                                                                 | 1.13 | 0.088  | 1.2E-01 | 6  | 5.7  |
| P00505 | Aspartate aminotransferase, mitochondrial                                | 1.13 | 0.037  | 6.4E-02 | 5  | 13.5 |
| P21912 | Succinate dehydrogenase [ubiquinone] iron-sulfur subunit, mitochondrial  | 1.13 | 0.404  | 3.5E-01 | 3  | 11.1 |

Table S1-Sample UM19

|        |                                                                                                                   |      |        |         |    |      |
|--------|-------------------------------------------------------------------------------------------------------------------|------|--------|---------|----|------|
| P49773 | Histidine triad nucleotide-binding protein 1                                                                      | 1.13 | NA     | NA      | 2  | 26.2 |
| P23396 | 40S ribosomal protein S3                                                                                          | 1.13 | 0.163  | 1.6E-01 | 6  | 24.7 |
| Q99714 | 3-hydroxyacyl-CoA dehydrogenase type-2                                                                            | 1.12 | NA     | NA      | 2  | 6.9  |
| P08571 | Monocyte differentiation antigen CD14                                                                             | 1.12 | NA     | NA      | 2  | 5.3  |
| Q99460 | 26S proteasome non-ATPase regulatory subunit 1                                                                    | 1.12 | NA     | NA      | 2  | 2.3  |
| P49411 | Elongation factor Tu, mitochondrial                                                                               | 1.12 | 0.338  | 5.9E-02 | 10 | 23.5 |
| P31930 | Cytochrome b-c1 complex subunit 1, mitochondrial                                                                  | 1.11 | 0.292  | 2.8E-01 | 5  | 14.0 |
| O00483 | NADH dehydrogenase [ubiquinone] 1 alpha subcomplex subunit 4                                                      | 1.11 | NA     | NA      | 2  | 22.2 |
| P63261 | Actin, cytoplasmic 2                                                                                              | 1.11 | 0.070  | 3.5E-01 | 5  | 16.8 |
| P30049 | ATP synthase subunit delta, mitochondrial                                                                         | 1.10 | NA     | NA      | 2  | 13.7 |
| P50991 | T-complex protein 1 subunit delta                                                                                 | 1.10 | 1.666  | 4.7E-01 | 6  | 14.8 |
| Q92841 | Probable ATP-dependent RNA helicase DDX17                                                                         | 1.10 | NA     | NA      | 2  | 3.0  |
| Q13200 | 26S proteasome non-ATPase regulatory subunit 2                                                                    | 1.09 | 0.315  | 5.2E-01 | 4  | 5.2  |
| P55072 | Transitional endoplasmic reticulum ATPase                                                                         | 1.09 | 0.089  | 1.9E-01 | 11 | 16.4 |
| P46782 | 40S ribosomal protein S5                                                                                          | 1.09 | NA     | NA      | 2  | 8.3  |
| P43304 | Glycerol-3-phosphate dehydrogenase, mitochondrial                                                                 | 1.08 | NA     | NA      | 2  | 3.4  |
| Q9NSD9 | Phenylalanine--tRNA ligase beta subunit                                                                           | 1.08 | NA     | NA      | 2  | 3.1  |
| P20700 | Lamin-B1                                                                                                          | 1.08 | 0.544  | 7.5E-01 | 8  | 14.7 |
| P06576 | ATP synthase subunit beta, mitochondrial                                                                          | 1.08 | 0.238  | 2.7E-01 | 9  | 20.8 |
| P50990 | T-complex protein 1 subunit theta                                                                                 | 1.07 | 0.231  | 2.6E-01 | 11 | 21.4 |
| P11177 | Pyruvate dehydrogenase E1 component subunit beta, mitochondrial                                                   | 1.07 | NA     | NA      | 2  | 4.2  |
| Q99733 | Nucleosome assembly protein 1-like 4                                                                              | 1.07 | NA     | NA      | 2  | 7.7  |
| Q92973 | Transportin-1                                                                                                     | 1.07 | NA     | NA      | 2  | 3.2  |
| Q15233 | Non-POU domain-containing octamer-binding protein                                                                 | 1.07 | 0.130  | 3.4E-01 | 3  | 8.1  |
| P55884 | Eukaryotic translation initiation factor 3 subunit B                                                              | 1.07 | NA     | NA      | 2  | 2.3  |
| Q15413 | Ryanodine receptor 3                                                                                              | 1.07 | NA     | NA      | 2  | 0.3  |
| P47985 | Cytochrome b-c1 complex subunit Rieske, mitochondrial                                                             | 1.06 | NA     | NA      | 2  | 8.0  |
| P46777 | 60S ribosomal protein L5                                                                                          | 1.06 | 0.415  | 7.9E-01 | 3  | 11.1 |
| Q99623 | Prohibitin-2                                                                                                      | 1.06 | 0.762  | 5.2E-01 | 5  | 19.4 |
| P39656 | Dolichyl-diphosphooligosaccharide--protein glycosyltransferase 48 kDa subunit                                     | 1.06 | 0.155  | 4.8E-01 | 5  | 10.5 |
| QUNM6  | 26S proteasome non-ATPase regulatory subunit 13                                                                   | 1.06 | NA     | NA      | 2  | 4.8  |
| P78527 | DNA-dependent protein kinase catalytic subunit                                                                    | 1.06 | 0.623  | 8.0E-01 | 10 | 2.8  |
| P61247 | 40S ribosomal protein S3a                                                                                         | 1.05 | 1.378  | 6.8E-01 | 4  | 17.0 |
| Q9Y3U8 | 60S ribosomal protein L36                                                                                         | 1.05 | 0.375  | 7.1E-01 | 4  | 30.5 |
| Q9Y262 | Eukaryotic translation initiation factor 3 subunit L                                                              | 1.05 | NA     | NA      | 2  | 3.4  |
| Q13011 | Delta(3,5)-Delta(2,4)-dienoyl-CoA isomerase, mitochondrial                                                        | 1.05 | NA     | NA      | 2  | 5.5  |
| Q14980 | Nuclear mitotic apparatus protein 1                                                                               | 1.05 | 0.827  | 5.7E-01 | 6  | 4.0  |
| Q8N1G4 | Leucine-rich repeat-containing protein 47                                                                         | 1.04 | NA     | NA      | 2  | 4.3  |
| Q86VV6 | Stimulator of interferon genes protein                                                                            | 1.04 | NA     | NA      | 2  | 5.8  |
| P33176 | Kinesin-1 heavy chain                                                                                             | 1.04 | 0.323  | 8.3E-01 | 4  | 4.9  |
| P07384 | Calpain-1 catalytic subunit                                                                                       | 1.04 | 1.498  | 9.3E-01 | 3  | 4.8  |
| Q02878 | 60S ribosomal protein L6                                                                                          | 1.04 | 1.367  | 9.0E-01 | 7  | 24.7 |
| Q14847 | LIM and SH3 domain protein 1                                                                                      | 1.04 | NA     | NA      | 2  | 8.8  |
| P48643 | T-complex protein 1 subunit epsilon                                                                               | 1.04 | 1.023  | 6.9E-01 | 9  | 15.5 |
| P62913 | 60S ribosomal protein L11                                                                                         | 1.03 | 0.244  | 8.1E-01 | 3  | 16.9 |
| Q9NR28 | Diablo homolog, mitochondrial                                                                                     | 1.03 | NA     | NA      | 2  | 8.8  |
| Q96124 | Far upstream element-binding protein 3                                                                            | 1.03 | NA     | NA      | 2  | 3.7  |
| P22695 | Cytochrome b-c1 complex subunit 2, mitochondrial                                                                  | 1.03 | 0.334  | 8.4E-01 | 5  | 14.3 |
| Q9Y383 | Putative RNA-binding protein Luc7-like 2                                                                          | 1.02 | NA     | NA      | 2  | 4.3  |
| Q96AE4 | Far upstream element-binding protein 1                                                                            | 1.02 | NA     | NA      | 2  | 2.5  |
| Q02543 | 60S ribosomal protein L18a                                                                                        | 1.02 | NA     | NA      | 2  | 10.2 |
| Q96QK1 | Vacuolar protein sorting-associated protein 35                                                                    | 1.02 | NA     | NA      | 2  | 2.6  |
| P49368 | T-complex protein 1 subunit gamma                                                                                 | 1.02 | 0.351  | 7.2E-01 | 7  | 16.1 |
| P53618 | Coatamer subunit beta                                                                                             | 1.02 | NA     | NA      | 2  | 2.1  |
| P18859 | ATP synthase-coupling factor 6, mitochondrial                                                                     | 1.02 | 0.891  | 9.0E-01 | 3  | 26.9 |
| O00203 | AP-3 complex subunit beta-1                                                                                       | 1.01 | 0.460  | 9.6E-01 | 3  | 3.6  |
| Q9H4M9 | EH domain-containing protein 1                                                                                    | 1.01 | NA     | NA      | 2  | 4.5  |
| P02790 | Hemopexin                                                                                                         | 1.01 | 0.203  | 8.9E-01 | 4  | 7.6  |
| Q9NTJ5 | Phosphatidylinositol phosphatase SAC1                                                                             | 1.01 | NA     | NA      | 2  | 3.4  |
| P27824 | Calnexin                                                                                                          | 1.00 | 0.230  | 9.8E-01 | 12 | 22.8 |
| P35573 | Glycogen debranching enzyme                                                                                       | 1.00 | NA     | NA      | 2  | 1.6  |
| Q99832 | T-complex protein 1 subunit eta                                                                                   | 1.00 | 0.337  | 9.8E-01 | 6  | 12.3 |
| P35580 | Myosin-10                                                                                                         | 1.00 | 49.586 | 9.9E-01 | 23 | 12.6 |
| P07919 | Cytochrome b-c1 complex subunit 6, mitochondrial                                                                  | 1.00 | NA     | NA      | 2  | 15.4 |
| P36871 | Phosphoglucomutase-1                                                                                              | 0.99 | NA     | NA      | 2  | 3.0  |
| Q9UHD8 | Septin-9                                                                                                          | 0.99 | 0.480  | 9.7E-01 | 5  | 9.7  |
| Q86U42 | Polyadenylate-binding protein 2                                                                                   | 0.99 | NA     | NA      | 2  | 5.6  |
| P29966 | Myristoylated alanine-rich C-kinase substrate                                                                     | 0.99 | 1.544  | 9.9E-01 | 6  | 31.6 |
| P40227 | T-complex protein 1 subunit zeta                                                                                  | 0.99 | 0.126  | 8.6E-01 | 3  | 6.0  |
| Q16352 | Alpha-internexin                                                                                                  | 0.99 | NA     | NA      | 2  | 5.2  |
| O75947 | ATP synthase subunit d, mitochondrial                                                                             | 0.99 | 0.502  | 9.3E-01 | 5  | 28.6 |
| P36957 | Dihydrodipolyllysine-residue succinyltransferase component of 2-oxoglutarate dehydrogenase complex, mitochondrial | 0.98 | 3.194  | 8.2E-01 | 4  | 10.2 |
| P48047 | ATP synthase subunit O, mitochondrial                                                                             | 0.98 | 0.301  | 8.8E-01 | 4  | 26.3 |
| Q9Y230 | RuvB-like 2                                                                                                       | 0.98 | 0.194  | 8.2E-01 | 3  | 8.6  |
| Q14258 | E3 ubiquitin/ISG15 ligase TRIM25                                                                                  | 0.98 | NA     | NA      | 2  | 3.8  |
| Q9P0L0 | Vesicle-associated membrane protein-associated protein A                                                          | 0.98 | NA     | NA      | 2  | 8.4  |
| Q9UIJ7 | GTP:AMP phosphotransferase AK3, mitochondrial                                                                     | 0.97 | 3.550  | 8.6E-01 | 4  | 18.9 |
| Q16891 | Mitochondrial inner membrane protein                                                                              | 0.97 | 0.160  | 6.9E-01 | 10 | 15.2 |
| P62318 | Small nuclear ribonucleoprotein Sm D3                                                                             | 0.97 | NA     | NA      | 2  | 24.6 |
| Q00325 | Phosphate carrier protein, mitochondrial                                                                          | 0.97 | 0.438  | 7.9E-01 | 5  | 13.8 |
| P26583 | High mobility group protein B2                                                                                    | 0.97 | NA     | NA      | 2  | 12.9 |
| P14866 | Heterogeneous nuclear ribonucleoprotein L                                                                         | 0.97 | 1.461  | 8.3E-01 | 6  | 12.6 |
| P82909 | 28S ribosomal protein S36, mitochondrial                                                                          | 0.97 | NA     | NA      | 2  | 25.2 |
| P62277 | 40S ribosomal protein S13                                                                                         | 0.97 | 4.701  | 7.9E-01 | 5  | 27.8 |
| Q93050 | V-type proton ATPase 116 kDa subunit a isoform 1                                                                  | 0.96 | NA     | NA      | 2  | 2.9  |
| Q15173 | Membrane-associated progesterone receptor component 2                                                             | 0.96 | 0.320  | 8.3E-01 | 4  | 21.5 |
| P30041 | Peroxiredoxin-6                                                                                                   | 0.96 | 0.619  | 7.0E-01 | 6  | 20.1 |
| Q15041 | ADP-ribosylation factor-like protein 6-interacting protein 1                                                      | 0.96 | NA     | NA      | 2  | 7.9  |
| O60664 | Perilipin-3                                                                                                       | 0.96 | NA     | NA      | 2  | 7.8  |
| P50914 | 60S ribosomal protein L14                                                                                         | 0.96 | NA     | NA      | 2  | 10.7 |
| P08574 | Cytochrome c1, heme protein, mitochondrial                                                                        | 0.96 | NA     | NA      | 2  | 7.1  |
| P16615 | Sarcoplasmic/endoplasmic reticulum calcium ATPase 2                                                               | 0.96 | 0.334  | 4.6E-01 | 9  | 10.1 |
| P27708 | CAD protein                                                                                                       | 0.95 | NA     | NA      | 2  | 1.2  |
| Q08378 | Golgin subfamily A member 3                                                                                       | 0.95 | NA     | NA      | 2  | 2.4  |
| Q99653 | Calcineurin B homologous protein 1                                                                                | 0.95 | NA     | NA      | 2  | 10.3 |
| P62269 | 40S ribosomal protein S18                                                                                         | 0.95 | 0.409  | 7.5E-01 | 5  | 23.0 |
| O43678 | NADH dehydrogenase [ubiquinone] 1 alpha subcomplex subunit 2                                                      | 0.95 | 0.838  | 8.9E-01 | 3  | 20.2 |
| Q9BRX8 | Redox-regulatory protein FAM213A                                                                                  | 0.95 | NA     | NA      | 2  | 8.7  |
| P14625 | Endoplasmic                                                                                                       | 0.95 | 0.823  | 5.2E-01 | 17 | 22.5 |
| P02763 | Alpha-1-acid glycoprotein 1                                                                                       | 0.95 | 5.798  | 6.8E-01 | 3  | 18.9 |
| O75964 | ATP synthase subunit g, mitochondrial                                                                             | 0.95 | NA     | NA      | 2  | 27.2 |
| P20674 | Cytochrome c oxidase subunit 5A, mitochondrial                                                                    | 0.94 | 1.205  | 8.4E-01 | 4  | 24.7 |
| O15511 | Actin-related protein 2/3 complex subunit 5                                                                       | 0.94 | NA     | NA      | 2  | 11.9 |
| Q9UHQ9 | NADH-cytochrome b5 reductase 1                                                                                    | 0.94 | 0.796  | 7.2E-01 | 3  | 9.8  |
| P42765 | 3-ketoacyl-CoA thiolase, mitochondrial                                                                            | 0.94 | 0.406  | 8.9E-01 | 4  | 14.9 |
| P04632 | Calpain small subunit 1                                                                                           | 0.94 | NA     | NA      | 2  | 6.3  |
| Q15075 | Early endosome antigen 1                                                                                          | 0.94 | 0.685  | 5.3E-01 | 3  | 2.9  |
| P63244 | Guanine nucleotide-binding protein subunit beta-2-like 1                                                          | 0.94 | 0.199  | 8.5E-01 | 4  | 12.0 |
| Q00232 | 26S proteasome non-ATPase regulatory subunit 12                                                                   | 0.94 | NA     | NA      | 2  | 4.4  |
| Q16795 | NADH dehydrogenase [ubiquinone] 1 alpha subcomplex subunit 9, mitochondrial                                       | 0.94 | 0.448  | 6.4E-01 | 3  | 10.1 |
| P60891 | Ribose-phosphate pyrophosphokinase 1                                                                              | 0.93 | NA     | NA      | 2  | 5.7  |
| P17987 | T-complex protein 1 subunit alpha                                                                                 | 0.93 | 0.072  | 2.9E-01 | 5  | 9.5  |
| P0CG05 | Ig lambda-2 chain C regions                                                                                       | 0.93 | 0.445  | 7.1E-01 | 3  | 46.2 |
| Q13151 | Heterogeneous nuclear ribonucleoprotein A0                                                                        | 0.93 | 1.152  | 6.2E-01 | 3  | 7.5  |
| P24539 | ATP synthase F(0) complex subunit B1, mitochondrial                                                               | 0.92 | 0.934  | 6.2E-01 | 3  | 13.3 |

Table S1-Sample UM19

|        |                                                                                                           |      |       |         |    |      |
|--------|-----------------------------------------------------------------------------------------------------------|------|-------|---------|----|------|
| P02647 | Apolipoprotein A-I                                                                                        | 0.92 | 0.865 | 3.2E-01 | 8  | 28.1 |
| P04843 | Dolichyl-diphosphooligosaccharide--protein glycosyltransferase subunit 1                                  | 0.92 | 0.162 | 3.0E-01 | 11 | 19.3 |
| Q14203 | Dynactin subunit 1                                                                                        | 0.92 | 0.071 | 2.2E-01 | 3  | 3.1  |
| P28161 | Glutathione S-transferase Mu 2                                                                            | 0.91 | NA    | NA      | 2  | 7.3  |
| Q12907 | Vesicular integral-membrane protein VIP36                                                                 | 0.91 | NA    | NA      | 2  | 6.2  |
| P53621 | Coatomer subunit alpha                                                                                    | 0.91 | 0.073 | 1.8E-01 | 3  | 2.5  |
| P32969 | 60S ribosomal protein L9                                                                                  | 0.91 | 0.419 | 5.6E-01 | 3  | 14.6 |
| P49257 | Protein ERGIC-53                                                                                          | 0.91 | 0.179 | 5.9E-01 | 3  | 9.6  |
| Q43390 | Heterogeneous nuclear ribonucleoprotein R                                                                 | 0.91 | 0.181 | 4.6E-01 | 6  | 11.5 |
| Q05193 | Dynammin-1                                                                                                | 0.91 | 0.087 | 3.6E-01 | 3  | 3.1  |
| P39023 | 60S ribosomal protein L3                                                                                  | 0.90 | 0.722 | 5.5E-01 | 3  | 8.9  |
| P40429 | 60S ribosomal protein L13a                                                                                | 0.90 | NA    | NA      | 2  | 9.4  |
| Q9Y310 | tRNA-splicing ligase RtcB homolog                                                                         | 0.89 | 0.454 | 6.4E-01 | 4  | 8.9  |
| P63208 | S-phase kinase-associated protein 1                                                                       | 0.89 | 1.422 | 7.4E-01 | 3  | 20.9 |
| P35232 | Prohibitin                                                                                                | 0.89 | 0.234 | 8.7E-02 | 6  | 23.5 |
| Q6NUK1 | Calcium-binding mitochondrial carrier protein SCaMC-1                                                     | 0.88 | 0.528 | 6.9E-01 | 3  | 5.2  |
| P47755 | F-actin-capping protein subunit alpha-2                                                                   | 0.87 | NA    | NA      | 2  | 12.2 |
| Q13228 | Selenium-binding protein 1                                                                                | 0.87 | NA    | NA      | 2  | 4.4  |
| Q99442 | Translocation protein SEC62                                                                               | 0.87 | NA    | NA      | 2  | 4.3  |
| P83731 | 60S ribosomal protein L24                                                                                 | 0.87 | NA    | NA      | 2  | 10.8 |
| Q9HDC9 | Adipocyte plasma membrane-associated protein                                                              | 0.87 | 0.183 | 3.8E-01 | 3  | 7.7  |
| P00390 | Glutathione reductase, mitochondrial                                                                      | 0.87 | 0.232 | 3.8E-01 | 3  | 9.8  |
| O15260 | Surfeit locus protein 4                                                                                   | 0.87 | NA    | NA      | 2  | 8.6  |
| Q00059 | Transcription factor A, mitochondrial                                                                     | 0.87 | 0.277 | 4.7E-01 | 3  | 7.7  |
| Q01813 | ATP-dependent 6-phosphofructokinase, platelet type                                                        | 0.86 | NA    | NA      | 2  | 3.2  |
| P46781 | 40S ribosomal protein S9                                                                                  | 0.86 | 1.101 | 6.6E-01 | 3  | 9.8  |
| P49748 | Very long-chain specific acyl-CoA dehydrogenase, mitochondrial                                            | 0.86 | 0.119 | 1.8E-01 | 5  | 7.6  |
| P54652 | Heat shock-related 70 kDa protein 2                                                                       | 0.85 | NA    | NA      | 2  | 4.4  |
| P02774 | Vitamin D-binding protein                                                                                 | 0.85 | NA    | NA      | 2  | 3.4  |
| P55084 | Trifunctional enzyme subunit beta, mitochondrial                                                          | 0.85 | 0.106 | 5.7E-02 | 5  | 10.8 |
| O95865 | N(G),N(G)-dimethylarginine dimethylaminohydrolase 2                                                       | 0.85 | NA    | NA      | 2  | 9.1  |
| P24534 | Elongation factor 1-beta                                                                                  | 0.85 | NA    | NA      | 2  | 7.1  |
| Q9UQE7 | Structural maintenance of chromosomes protein 3                                                           | 0.85 | 0.099 | 2.4E-01 | 3  | 2.3  |
| Q8IVF2 | Protein AHNAK2                                                                                            | 0.85 | NA    | NA      | 2  | 0.4  |
| P35637 | RNA-binding protein FUS                                                                                   | 0.85 | 0.129 | 1.3E-01 | 4  | 10.6 |
| P50402 | Emerin                                                                                                    | 0.84 | NA    | NA      | 2  | 9.8  |
| P56556 | NADH dehydrogenase [ubiquinone] 1 alpha subcomplex subunit 6                                              | 0.84 | NA    | NA      | 2  | 15.6 |
| O14950 | Myosin regulatory light chain 12B                                                                         | 0.84 | NA    | NA      | 2  | 12.2 |
| P01625 | Ig kappa chain V-IH region Len                                                                            | 0.84 | NA    | NA      | 2  | 21.1 |
| P04844 | Dolichyl-diphosphooligosaccharide--protein glycosyltransferase subunit 2                                  | 0.84 | NA    | NA      | 2  | 4.1  |
| O43865 | Putative adenosylhomocysteinase 2                                                                         | 0.83 | 0.259 | 3.5E-01 | 4  | 7.0  |
| O14735 | CDP-diaclyglycerol--inositol 3-phosphatidyltransferase                                                    | 0.83 | NA    | NA      | 2  | 9.9  |
| P50151 | Guanine nucleotide-binding protein G(I)/G(S)/G(O) subunit gamma-10                                        | 0.83 | NA    | NA      | 2  | 26.5 |
| P05362 | Intercellular adhesion molecule 1                                                                         | 0.82 | 0.176 | 2.1E-01 | 4  | 10.5 |
| P40939 | Trifunctional enzyme subunit alpha, mitochondrial                                                         | 0.82 | 0.131 | 3.9E-02 | 14 | 23.1 |
| Q9H3Z4 | DnaJ homolog subfamily C member 5                                                                         | 0.82 | NA    | NA      | 2  | 8.1  |
| P62244 | 40S ribosomal protein S15a                                                                                | 0.82 | NA    | NA      | 2  | 12.3 |
| P09496 | Clathrin light chain A                                                                                    | 0.81 | 0.550 | 7.2E-01 | 3  | 8.9  |
| P16435 | NADPH--cytochrome P450 reductase                                                                          | 0.81 | NA    | NA      | 2  | 3.0  |
| Q14764 | Major vault protein                                                                                       | 0.81 | 0.325 | 3.2E-01 | 4  | 5.0  |
| P11279 | Lysosome-associated membrane glycoprotein 1                                                               | 0.81 | NA    | NA      | 2  | 4.1  |
| P47813 | Eukaryotic translation initiation factor 1A, X-chromosomal                                                | 0.80 | NA    | NA      | 2  | 13.9 |
| P25705 | ATP synthase subunit alpha, mitochondrial                                                                 | 0.80 | 0.112 | 9.1E-03 | 15 | 31.3 |
| P10606 | Cytochrome c oxidase subunit 5B, mitochondrial                                                            | 0.80 | 1.013 | 5.1E-01 | 3  | 15.5 |
| P09543 | 2',3'-cyclic-nucleotide 3'-phosphodiesterase                                                              | 0.80 | 0.260 | 3.5E-01 | 5  | 11.4 |
| P51648 | Fatty aldehyde dehydrogenase                                                                              | 0.80 | NA    | NA      | 2  | 4.5  |
| Q14108 | Lysosome membrane protein 2                                                                               | 0.80 | NA    | NA      | 2  | 4.6  |
| O75489 | NADH dehydrogenase [ubiquinone] iron-sulfur protein 3, mitochondrial                                      | 0.80 | NA    | NA      | 2  | 9.1  |
| Q6UXV4 | Apolipoprotein O-like                                                                                     | 0.80 | NA    | NA      | 2  | 11.6 |
| P00367 | Glutamate dehydrogenase 1, mitochondrial                                                                  | 0.79 | 0.168 | 1.1E-01 | 4  | 8.8  |
| P48681 | Nestin                                                                                                    | 0.79 | NA    | NA      | 2  | 1.5  |
| P21266 | Glutathione S-transferase Mu 3                                                                            | 0.79 | NA    | NA      | 2  | 9.3  |
| Q86VB7 | Scavenger receptor cysteine-rich type 1 protein M130                                                      | 0.79 | 0.191 | 2.1E-01 | 3  | 2.9  |
| P01860 | Ig gamma-3 chain C region                                                                                 | 0.78 | 0.181 | 2.4E-01 | 3  | 6.4  |
| P67870 | Casein kinase II subunit beta                                                                             | 0.78 | NA    | NA      | 2  | 10.2 |
| P67936 | Tropomyosin alpha-4 chain                                                                                 | 0.78 | 0.413 | 1.9E-01 | 8  | 25.0 |
| O43707 | Alpha-actinin-4                                                                                           | 0.78 | 0.061 | 2.3E-04 | 18 | 23.9 |
| P62701 | 40S ribosomal protein S4, X isoform                                                                       | 0.78 | 0.227 | 4.8E-01 | 3  | 13.7 |
| P24752 | Acetyl-CoA acetyltransferase, mitochondrial                                                               | 0.78 | 0.097 | 1.2E-01 | 5  | 16.2 |
| P45880 | Voltage-dependent anion-selective channel protein 2                                                       | 0.78 | 0.084 | 4.9E-03 | 4  | 17.0 |
| Q14204 | Cytoplasmic dynein 1 heavy chain 1                                                                        | 0.77 | 0.086 | 3.0E-03 | 24 | 6.0  |
| P35221 | Catenin alpha-1                                                                                           | 0.77 | NA    | NA      | 2  | 3.4  |
| P58876 | Histone H2B type 1-D                                                                                      | 0.77 | NA    | NA      | 2  | 7.9  |
| P36542 | ATP synthase subunit gamma, mitochondrial                                                                 | 0.77 | NA    | NA      | 2  | 7.0  |
| Q16695 | Histone H3.1t                                                                                             | 0.76 | 0.087 | 5.3E-02 | 4  | 19.1 |
| Q7KZF4 | Staphylococcal nuclease domain-containing protein 1                                                       | 0.76 | 0.796 | 4.6E-01 | 5  | 7.4  |
| Q92499 | ATP-dependent RNA helicase DDX1                                                                           | 0.76 | 0.377 | 3.3E-01 | 3  | 4.2  |
| O94919 | Endonuclease domain-containing 1 protein                                                                  | 0.75 | 0.147 | 7.0E-02 | 3  | 8.4  |
| Q9Y2J2 | Band 4.1-like protein 3                                                                                   | 0.75 | NA    | NA      | 2  | 3.3  |
| P61225 | Ras-related protein Rap-2b                                                                                | 0.74 | NA    | NA      | 2  | 10.9 |
| P04839 | Cytochrome b-245 heavy chain                                                                              | 0.74 | NA    | NA      | 2  | 1.9  |
| Q9BSJ8 | Extended synaptotagmin-1                                                                                  | 0.73 | 0.222 | 1.2E-01 | 4  | 4.0  |
| Q9BQE3 | Tubulin alpha-1C chain                                                                                    | 0.73 | 0.231 | 6.3E-02 | 3  | 8.7  |
| Q6DD88 | Atlastin-3                                                                                                | 0.72 | 0.119 | 1.7E-01 | 5  | 9.2  |
| Q53GQ0 | Estradiol 17-beta-dehydrogenase 12                                                                        | 0.72 | 0.064 | 1.9E-02 | 3  | 11.2 |
| Q9NP97 | Dynein light chain roadblock-type 1                                                                       | 0.72 | NA    | NA      | 2  | 29.2 |
| Q13561 | Dynactin subunit 2                                                                                        | 0.72 | 0.319 | 1.5E-01 | 6  | 19.0 |
| O00264 | Membrane-associated progesterone receptor component 1                                                     | 0.71 | 0.142 | 2.3E-02 | 4  | 16.4 |
| Q9NQC3 | Reticulon-4                                                                                               | 0.71 | 0.062 | 5.6E-04 | 3  | 2.7  |
| P63092 | Guanine nucleotide-binding protein G(s) subunit alpha isoforms short                                      | 0.71 | 0.266 | 2.5E-01 | 3  | 12.2 |
| P00918 | Carbonic anhydrase 2                                                                                      | 0.70 | NA    | NA      | 2  | 10.8 |
| P01023 | Alpha-2-macroglobulin                                                                                     | 0.70 | 0.110 | 1.4E-01 | 5  | 4.5  |
| P14927 | Cytochrome b-c1 complex subunit 7                                                                         | 0.69 | NA    | NA      | 2  | 15.3 |
| O94979 | Protein transport protein Sec31A                                                                          | 0.69 | 0.557 | 3.2E-01 | 3  | 2.6  |
| Q27J81 | Inverted formin-2                                                                                         | 0.69 | NA    | NA      | 2  | 1.6  |
| P02545 | Prelamin-A/C                                                                                              | 0.69 | 0.046 | 3.8E-10 | 30 | 47.3 |
| Q9POM6 | Core histone macro-H2A.2                                                                                  | 0.69 | NA    | NA      | 2  | 8.6  |
| Q02252 | Methylmalonate-semialdehyde dehydrogenase [acylating], mitochondrial                                      | 0.68 | NA    | NA      | 2  | 4.9  |
| Q12797 | Aspartyl/asparaginyl beta-hydroxylase                                                                     | 0.68 | 0.121 | 1.4E-01 | 3  | 2.9  |
| P05091 | Aldehyde dehydrogenase, mitochondrial                                                                     | 0.68 | 0.073 | 3.3E-03 | 3  | 6.0  |
| A0FGR8 | Extended synaptotagmin-2                                                                                  | 0.68 | NA    | NA      | 2  | 3.0  |
| P01009 | Alpha-1-antitrypsin                                                                                       | 0.67 | 0.103 | 1.4E-03 | 9  | 22.5 |
| P09382 | Galectin-1                                                                                                | 0.67 | 0.110 | 5.7E-04 | 6  | 46.7 |
| P68871 | Hemoglobin subunit beta                                                                                   | 0.67 | 0.056 | 3.3E-04 | 5  | 44.9 |
| P62280 | 40S ribosomal protein S11                                                                                 | 0.67 | 0.571 | 4.4E-01 | 3  | 17.1 |
| Q07065 | Cytoskeleton-associated protein 4                                                                         | 0.66 | 0.049 | 1.5E-03 | 4  | 8.6  |
| P10515 | Dihydropyridyllysine-residue acetyltransferase component of pyruvate dehydrogenase complex, mitochondrial | 0.66 | NA    | NA      | 2  | 2.6  |
| P17612 | cAMP-dependent protein kinase catalytic subunit alpha                                                     | 0.66 | 0.285 | 2.4E-01 | 3  | 6.8  |
| Q9Y639 | Neuroplastin                                                                                              | 0.65 | 0.237 | 2.3E-01 | 3  | 9.3  |
| O60313 | Dynammin-like 120 kDa protein, mitochondrial                                                              | 0.65 | 0.416 | 3.2E-01 | 5  | 6.8  |
| P04040 | Catalase                                                                                                  | 0.65 | 0.068 | 2.9E-01 | 3  | 7.2  |
| Q8NBS9 | Thioredoxin domain-containing protein 5                                                                   | 0.64 | 0.187 | 2.3E-01 | 5  | 10.6 |
| Q9Y490 | Talin-1                                                                                                   | 0.64 | 0.049 | 1.1E-08 | 26 | 14.0 |
| P46939 | Utrophin                                                                                                  | 0.64 | NA    | NA      | 2  | 0.9  |
| P35579 | Myosin-9                                                                                                  | 0.63 | 0.039 | 2.9E-15 | 63 | 28.4 |

Table S1-Sample UM19

|        |                                                                                   |      |       |         |    |      |
|--------|-----------------------------------------------------------------------------------|------|-------|---------|----|------|
| P55060 | Exportin-2                                                                        | 0.63 | NA    | NA      | 2  | 2.3  |
| Q9H223 | EH domain-containing protein 4                                                    | 0.63 | 0.070 | 9.3E-02 | 3  | 5.0  |
| P09497 | Clathrin light chain B                                                            | 0.63 | 0.113 | 1.3E-01 | 4  | 15.3 |
| P00387 | NADH-cytochrome b5 reductase 3                                                    | 0.62 | 0.072 | 4.3E-03 | 6  | 22.3 |
| Q15149 | Plectin                                                                           | 0.62 | 0.049 | 8.4E-12 | 52 | 12.6 |
| Q9UHG3 | Prenylcysteine oxidase 1                                                          | 0.62 | 0.094 | 2.6E-02 | 4  | 8.5  |
| P60660 | Myosin light polypeptide 6                                                        | 0.62 | 0.069 | 2.3E-07 | 9  | 58.3 |
| Q96CW1 | AP-2 complex subunit mu                                                           | 0.61 | NA    | NA      | 2  | 4.6  |
| P29992 | Guanine nucleotide-binding protein subunit alpha-11                               | 0.61 | 0.120 | 2.1E-01 | 3  | 11.1 |
| Q16181 | Septin-7                                                                          | 0.61 | 0.034 | 8.0E-04 | 7  | 20.6 |
| P13861 | cAMP-dependent protein kinase type II-alpha regulatory subunit                    | 0.61 | 0.080 | 3.9E-02 | 4  | 13.9 |
| Q9Y277 | Voltage-dependent anion-selective channel protein 3                               | 0.61 | NA    | NA      | 2  | 7.4  |
| O75915 | PRA1 family protein 3                                                             | 0.61 | NA    | NA      | 2  | 9.6  |
| P61163 | Alpha-centractin                                                                  | 0.60 | 0.169 | 2.5E-02 | 3  | 8.5  |
| P50995 | Annexin A11                                                                       | 0.60 | 0.177 | 4.2E-02 | 4  | 7.5  |
| O75131 | Copine-3                                                                          | 0.60 | NA    | NA      | 2  | 4.3  |
| O60716 | Catenin delta-1                                                                   | 0.60 | NA    | NA      | 2  | 2.3  |
| P54920 | Alpha-soluble NSF attachment protein                                              | 0.59 | 0.648 | 2.4E-01 | 5  | 18.6 |
| P50502 | Hsc70-interacting protein                                                         | 0.59 | 0.348 | 1.8E-01 | 4  | 9.8  |
| O94760 | N(G),N(G)-dimethylarginine dimethylaminohydrolase 1                               | 0.59 | NA    | NA      | 2  | 9.1  |
| O94905 | Erlin-2                                                                           | 0.58 | 0.141 | 1.1E-02 | 5  | 16.2 |
| O95782 | AP-2 complex subunit alpha-1                                                      | 0.58 | NA    | NA      | 2  | 2.0  |
| Q15019 | Septin-2                                                                          | 0.58 | 0.091 | 4.1E-03 | 6  | 20.5 |
| Q14956 | Transmembrane glycoprotein NMB                                                    | 0.57 | NA    | NA      | 2  | 3.3  |
| P62805 | Histone H4                                                                        | 0.57 | 0.066 | 9.1E-10 | 7  | 52.4 |
| P23634 | Plasma membrane calcium-transporting ATPase 4                                     | 0.57 | 0.316 | 2.6E-01 | 3  | 3.3  |
| Q99572 | P2X purinoceptor 7                                                                | 0.57 | NA    | NA      | 2  | 3.5  |
| Q9HD20 | Manganese-transporting ATPase 13A1                                                | 0.55 | 0.723 | 2.2E-01 | 3  | 3.2  |
| Q16270 | Insulin-like growth factor-binding protein 7                                      | 0.55 | NA    | NA      | 2  | 10.3 |
| P35611 | Alpha-adducin                                                                     | 0.55 | NA    | NA      | 2  | 4.5  |
| P35613 | Basigin                                                                           | 0.55 | NA    | NA      | 2  | 8.3  |
| Q14254 | Flotillin-2                                                                       | 0.54 | 0.187 | 7.5E-02 | 3  | 7.5  |
| P08133 | Annexin A6                                                                        | 0.54 | 0.052 | 1.9E-13 | 27 | 40.4 |
| P12111 | Collagen alpha-3(VI) chain                                                        | 0.54 | 0.055 | 2.1E-11 | 39 | 13.8 |
| P30153 | Serine/threonine-protein phosphatase 2A 65 kDa regulatory subunit A alpha isoform | 0.54 | 0.142 | 8.6E-02 | 3  | 4.9  |
| P0C055 | Histone H2A.Z                                                                     | 0.53 | NA    | NA      | 2  | 18.8 |
| P49458 | Signal recognition particle 9 kDa protein                                         | 0.53 | NA    | NA      | 2  | 22.1 |
| Q9UPN3 | Microtubule-actin cross-linking factor 1, isoforms 1/2/3/5                        | 0.53 | NA    | NA      | 2  | 0.7  |
| Q8WUM4 | Programmed cell death 6-interacting protein                                       | 0.53 | 0.123 | 3.0E-02 | 3  | 3.4  |
| P17655 | Calpain-2 catalytic subunit                                                       | 0.52 | NA    | NA      | 2  | 2.6  |
| P04899 | Guanine nucleotide-binding protein G(i) subunit alpha-2                           | 0.52 | 0.154 | 2.6E-03 | 4  | 14.6 |
| P08107 | Heat shock 70 kDa protein 1A/1B                                                   | 0.51 | 0.055 | 1.1E-06 | 10 | 19.5 |
| Q05682 | Caldesmon                                                                         | 0.51 | 0.133 | 2.1E-02 | 4  | 6.6  |
| O43491 | Band 4.1-like protein 2                                                           | 0.50 | 0.120 | 1.3E-03 | 8  | 10.7 |
| O14495 | Lipid phosphate phosphohydrolase 3                                                | 0.50 | NA    | NA      | 2  | 3.9  |
| P07099 | Epoxide hydrolase 1                                                               | 0.50 | 0.051 | 7.6E-07 | 8  | 16.3 |
| P35222 | Catenin beta-1                                                                    | 0.50 | 0.556 | 2.4E-01 | 4  | 6.4  |
| Q00610 | Clathrin heavy chain 1                                                            | 0.50 | 0.086 | 5.7E-10 | 26 | 17.1 |
| Q14192 | Four and a half LIM domains protein 2                                             | 0.50 | NA    | NA      | 2  | 7.9  |
| P09936 | Ubiquitin carboxyl-terminal hydrolase isozyme L1                                  | 0.50 | 0.915 | 3.7E-01 | 5  | 28.3 |
| Q03591 | Complement factor H-related protein 1                                             | 0.49 | NA    | NA      | 2  | 9.4  |
| Q15836 | Vesicle-associated membrane protein 3                                             | 0.49 | NA    | NA      | 2  | 24.0 |
| P68371 | Tubulin beta-4B chain                                                             | 0.49 | NA    | NA      | 2  | 7.2  |
| Q99584 | Protein S100-A13                                                                  | 0.49 | 0.181 | 1.8E-02 | 3  | 30.6 |
| P06396 | Gelsolin                                                                          | 0.49 | 0.161 | 4.8E-04 | 11 | 17.6 |
| Q13418 | Integrin-linked protein kinase                                                    | 0.49 | NA    | NA      | 2  | 4.4  |
| Q00468 | Agrin                                                                             | 0.49 | NA    | NA      | 2  | 1.1  |
| P69905 | Hemoglobin subunit alpha                                                          | 0.49 | 0.107 | 1.4E-05 | 6  | 62.0 |
| Q09666 | Neuroblast differentiation-associated protein AHNAK                               | 0.48 | 0.042 | 0.0E+00 | 77 | 12.5 |
| P04217 | Alpha-1B-glycoprotein                                                             | 0.48 | NA    | NA      | 2  | 4.8  |
| P04792 | Heat shock protein beta-1                                                         | 0.47 | 0.134 | 2.0E-03 | 6  | 31.2 |
| P42167 | Lamina-associated polypeptide 2, isoforms beta/gamma                              | 0.47 | 0.216 | 2.7E-01 | 4  | 10.8 |
| P13987 | CD59 glycoprotein                                                                 | 0.47 | NA    | NA      | 2  | 15.6 |
| P12814 | Alpha-actinin-1                                                                   | 0.47 | 0.047 | 4.5E-07 | 10 | 14.1 |
| Q9HBL0 | Tensin-1                                                                          | 0.47 | NA    | NA      | 2  | 2.1  |
| P54709 | Sodium/potassium-transporting ATPase subunit beta-3                               | 0.47 | 0.147 | 5.5E-02 | 3  | 13.6 |
| P0C0L5 | Complement C4-B                                                                   | 0.46 | 0.139 | 6.1E-03 | 4  | 1.9  |
| P12109 | Collagen alpha-1(VI) chain                                                        | 0.46 | 0.102 | 1.4E-04 | 11 | 12.4 |
| P23229 | Integrin alpha-6                                                                  | 0.45 | NA    | NA      | 2  | 2.1  |
| Q07954 | Prolow-density lipoprotein receptor-related protein 1                             | 0.45 | 0.138 | 5.3E-05 | 9  | 2.6  |
| Q02952 | A-kinase anchor protein 12                                                        | 0.44 | 0.099 | 9.0E-05 | 21 | 15.7 |
| P80723 | Brain acid soluble protein 1                                                      | 0.44 | 0.069 | 3.4E-05 | 7  | 63.4 |
| Q03252 | Lamin-B2                                                                          | 0.43 | 0.056 | 1.2E-07 | 14 | 24.3 |
| P09493 | Tropomyosin alpha-1 chain                                                         | 0.43 | 0.521 | 7.2E-02 | 5  | 12.0 |
| Q14344 | Guanine nucleotide-binding protein subunit alpha-13                               | 0.42 | 0.226 | 4.8E-02 | 3  | 9.0  |
| Q9NR12 | PDZ and LIM domain protein 7                                                      | 0.41 | NA    | NA      | 2  | 4.8  |
| P01024 | Complement C3                                                                     | 0.41 | 0.158 | 5.9E-04 | 17 | 10.5 |
| P20073 | Annexin A7                                                                        | 0.41 | 0.290 | 5.9E-01 | 3  | 8.6  |
| P00167 | Cytochrome b5                                                                     | 0.40 | 0.197 | 5.4E-02 | 4  | 42.5 |
| P00738 | Haptoglobin                                                                       | 0.40 | 0.100 | 4.2E-04 | 4  | 11.3 |
| Q9NZN4 | EH domain-containing protein 2                                                    | 0.39 | 0.267 | 2.9E-02 | 4  | 7.4  |
| P68032 | Actin, alpha cardiac muscle 1                                                     | 0.39 | 0.281 | 9.5E-03 | 7  | 28.9 |
| P0C0S8 | Histone H2A type 1                                                                | 0.39 | 0.411 | 1.3E-01 | 3  | 28.5 |
| O75955 | Flotillin-1                                                                       | 0.38 | NA    | NA      | 2  | 4.9  |
| P06899 | Histone H2B type 1-J                                                              | 0.38 | NA    | NA      | 2  | 7.9  |
| P62873 | Guanine nucleotide-binding protein G(I)/G(S)/G(T) subunit beta-1                  | 0.37 | NA    | NA      | 2  | 9.4  |
| Q16563 | Synaptophysin-like protein 1                                                      | 0.36 | NA    | NA      | 2  | 10.0 |
| P10301 | Ras-related protein R-Ras                                                         | 0.35 | NA    | NA      | 2  | 10.6 |
| Q5JRA6 | Melanoma inhibitory activity protein 3                                            | 0.34 | NA    | NA      | 2  | 1.2  |
| Q96CX2 | BTB/POZ domain-containing protein KCTD12                                          | 0.34 | NA    | NA      | 2  | 5.8  |
| Q00577 | Transcriptional activator protein Pur-alpha                                       | 0.33 | 0.300 | 1.5E-01 | 3  | 6.8  |
| P04216 | Thy-1 membrane glycoprotein                                                       | 0.31 | NA    | NA      | 2  | 15.5 |
| P43121 | Cell surface glycoprotein MUC18                                                   | 0.30 | 0.330 | 9.9E-02 | 3  | 5.6  |
| P61626 | Lysozyme C                                                                        | 0.28 | NA    | NA      | 2  | 12.8 |
| P16157 | Ankyrin-1                                                                         | 0.27 | NA    | NA      | 2  | 1.5  |
| P50895 | Basal cell adhesion molecule                                                      | 0.26 | 0.231 | 7.3E-02 | 3  | 7.8  |
| Q6UXB8 | Peptidase inhibitor 16                                                            | 0.26 | NA    | NA      | 2  | 4.3  |
| P41222 | Prostaglandin-H2 D-isomerase                                                      | 0.25 | NA    | NA      | 2  | 12.1 |
| P08311 | Cathepsin G                                                                       | 0.25 | NA    | NA      | 2  | 10.6 |
| O43242 | 26S proteasome non-ATPase regulatory subunit 3                                    | 0.24 | NA    | NA      | 2  | 3.0  |
| O94875 | Sorbin and SH3 domain-containing protein 2                                        | 0.24 | 0.562 | 1.4E-01 | 3  | 4.6  |
| P07197 | Neurofilament medium polypeptide                                                  | 0.23 | NA    | NA      | 2  | 2.9  |
| P12277 | Creatine kinase B-type                                                            | 0.22 | NA    | NA      | 2  | 4.2  |
| P05186 | Alkaline phosphatase, tissue-nonspecific isozyme                                  | 0.21 | 0.956 | 3.5E-01 | 3  | 5.2  |
| P07305 | Histone H1.0                                                                      | 0.21 | NA    | NA      | 2  | 9.3  |
| P22105 | Tenascin-X                                                                        | 0.20 | 0.162 | 9.0E-02 | 6  | 1.4  |
| Q9BXN1 | Asporin                                                                           | 0.20 | NA    | NA      | 2  | 2.9  |
| Q7Z7G0 | Target of Nesh-SH3                                                                | 0.19 | NA    | NA      | 2  | 2.0  |
| Q969G5 | Protein kinase C delta-binding protein                                            | 0.18 | NA    | NA      | 2  | 7.3  |
| Q13361 | Microfibrillar-associated protein 5                                               | 0.17 | NA    | NA      | 2  | 13.3 |
| P07360 | Complement component C8 gamma chain                                               | 0.17 | 0.426 | 2.1E-01 | 3  | 23.8 |
| Q6UWY5 | Olfactomedin-like protein 1                                                       | 0.17 | NA    | NA      | 2  | 6.5  |
| Q92777 | Synapsin-2                                                                        | 0.16 | NA    | NA      | 2  | 4.1  |
| P02462 | Collagen alpha-1(IV) chain                                                        | 0.16 | 0.494 | 1.3E-01 | 3  | 2.5  |
| P24844 | Myosin regulatory light polypeptide 9                                             | 0.16 | NA    | NA      | 2  | 12.2 |

Table S1-Sample UM19

|        |                                                                      |      |       |         |    |      |
|--------|----------------------------------------------------------------------|------|-------|---------|----|------|
| P26006 | Integrin alpha-3                                                     | 0.14 | NA    | NA      | 2  | 2.5  |
| Q01995 | Transgelin                                                           | 0.14 | NA    | NA      | 2  | 12.9 |
| Q13885 | Tubulin beta-2A chain                                                | 0.14 | NA    | NA      | 2  | 4.7  |
| Q16853 | Membrane primary amine oxidase                                       | 0.14 | NA    | NA      | 2  | 2.6  |
| P58166 | Inhibin beta E chain                                                 | 0.13 | NA    | NA      | 2  | 5.7  |
| P43320 | Beta-crystallin B2                                                   | 0.12 | 0.390 | 1.9E-01 | 3  | 15.6 |
| P21246 | Pleiotrophin                                                         | 0.11 | NA    | NA      | 2  | 9.5  |
| P10643 | Complement component C7                                              | 0.11 | 0.436 | 1.3E-01 | 3  | 5.3  |
| Q13509 | Tubulin beta-3 chain                                                 | 0.10 | NA    | NA      | 2  | 4.7  |
| Q9UBX5 | Fibulin-5                                                            | 0.09 | NA    | NA      | 2  | 3.6  |
| P05164 | Myeloperoxidase                                                      | 0.08 | 0.502 | 9.1E-02 | 3  | 5.1  |
| P10745 | Retinol-binding protein 3                                            | 0.07 | NA    | NA      | 2  | 1.5  |
| Q03135 | Caveolin-1                                                           | 0.06 | NA    | NA      | 2  | 13.5 |
| P03973 | Antileukoproteinase                                                  | 0.06 | NA    | NA      | 2  | 18.9 |
| P23946 | Chymase                                                              | 0.06 | 0.427 | 7.3E-02 | 3  | 16.2 |
| P63211 | Guanine nucleotide-binding protein G(T) subunit gamma-T1             | 0.05 | NA    | NA      | 2  | 17.6 |
| P32119 | Peroxiredoxin-2                                                      | 0.38 | 0.074 | 3.5E-06 | 4  | 18.2 |
| O94832 | Unconventional myosin-ld                                             | 0.37 | 0.180 | 2.6E-02 | 4  | 4.4  |
| Q9NZM1 | Myoferlin                                                            | 0.36 | 0.073 | 1.4E-04 | 6  | 3.4  |
| P12110 | Collagen alpha-2(VI) chain                                           | 0.35 | 0.180 | 3.6E-03 | 8  | 10.0 |
| Q01082 | Spectrin beta chain, non-erythrocytic 1                              | 0.35 | 0.041 | 0.0E+00 | 61 | 30.3 |
| P07942 | Laminin subunit beta-1                                               | 0.35 | 0.075 | 1.9E-03 | 5  | 2.9  |
| P05023 | Sodium/potassium-transporting ATPase subunit alpha-1                 | 0.35 | 0.068 | 9.3E-10 | 22 | 23.2 |
| P41219 | Peripherin                                                           | 0.34 | 0.330 | 9.1E-03 | 11 | 23.2 |
| O75369 | Filamin-B                                                            | 0.33 | 0.163 | 8.3E-04 | 5  | 2.9  |
| P06727 | Apolipoprotein A-IV                                                  | 0.33 | 0.123 | 1.5E-04 | 9  | 23.7 |
| Q13813 | Spectrin alpha chain, non-erythrocytic 1                             | 0.32 | 0.039 | 0.0E+00 | 73 | 34.6 |
| P05556 | Integrin beta-1                                                      | 0.32 | 0.173 | 3.0E-03 | 4  | 6.5  |
| P18206 | Vinculin                                                             | 0.29 | 0.116 | 1.5E-07 | 13 | 14.8 |
| P21333 | Filamin-A                                                            | 0.29 | 0.045 | 0.0E+00 | 52 | 26.3 |
| P22413 | Ectonucleotide pyrophosphatase/phosphodiesterase family member 1     | 0.28 | 0.256 | 2.7E-02 | 5  | 5.3  |
| P14555 | Phospholipase A2, membrane associated                                | 0.27 | 0.216 | 2.8E-02 | 3  | 11.1 |
| P04083 | Annexin A1                                                           | 0.27 | 0.054 | 0.0E+00 | 13 | 40.8 |
| P26447 | Protein S100-A4                                                      | 0.27 | 0.135 | 1.2E-03 | 3  | 27.7 |
| P07355 | Annexin A2                                                           | 0.25 | 0.055 | 0.0E+00 | 21 | 47.8 |
| P08572 | Collagen alpha-2(IV) chain                                           | 0.23 | 0.294 | 3.4E-03 | 6  | 4.4  |
| Q16555 | Dihydropyrimidinase-related protein 2                                | 0.23 | 0.157 | 7.0E-05 | 9  | 19.2 |
| P46821 | Microtubule-associated protein 1B                                    | 0.22 | 0.326 | 1.7E-02 | 4  | 2.1  |
| P27105 | Erythrocyte band 7 integral membrane protein                         | 0.22 | 0.134 | 3.0E-03 | 7  | 25.3 |
| P36269 | Gamma-glutamyltransferase 5                                          | 0.22 | 0.187 | 1.5E-04 | 5  | 10.6 |
| Q16363 | Laminin subunit alpha-4                                              | 0.21 | 0.173 | 6.7E-03 | 4  | 2.6  |
| P02654 | Apolipoprotein C-I                                                   | 0.21 | 0.103 | 6.6E-03 | 3  | 24.1 |
| O00159 | Unconventional myosin-1c                                             | 0.21 | 0.256 | 3.5E-02 | 5  | 4.9  |
| P02751 | Fibronectin                                                          | 0.21 | 0.084 | 7.9E-10 | 12 | 6.8  |
| P60903 | Protein S100-A10                                                     | 0.20 | 0.103 | 4.3E-07 | 5  | 36.1 |
| P00450 | Ceruloplasmin                                                        | 0.20 | 0.102 | 3.6E-04 | 6  | 6.2  |
| O15230 | Laminin subunit alpha-5                                              | 0.20 | 0.155 | 2.9E-03 | 14 | 5.0  |
| P01011 | Alpha-1-antichymotrypsin                                             | 0.20 | 0.114 | 3.9E-07 | 6  | 12.5 |
| P11047 | Laminin subunit gamma-1                                              | 0.20 | 0.233 | 2.2E-04 | 12 | 8.0  |
| P00747 | Plasminogen                                                          | 0.19 | 0.168 | 3.9E-06 | 6  | 7.3  |
| P39059 | Collagen alpha-1(XV) chain                                           | 0.19 | 0.166 | 9.9E-04 | 5  | 3.8  |
| P04196 | Histidine-rich glycoprotein                                          | 0.19 | 0.245 | 2.8E-03 | 3  | 5.3  |
| P98160 | Basement membrane-specific heparan sulfate proteoglycan core protein | 0.19 | 0.087 | 9.5E-13 | 30 | 8.8  |
| P02549 | Spectrin alpha chain, erythrocytic 1                                 | 0.19 | 0.262 | 1.2E-02 | 7  | 4.0  |
| Q08294 | Extracellular superoxide dismutase [Cu-Zn]                           | 0.19 | 0.412 | 2.8E-02 | 3  | 15.4 |
| Q9BXM0 | Periaxin                                                             | 0.18 | 0.464 | 1.5E-02 | 7  | 3.5  |
| Q9Y6C2 | EMILIN-1                                                             | 0.18 | 0.254 | 1.1E-03 | 7  | 9.2  |
| Q14112 | Nidogen-2                                                            | 0.18 | 0.187 | 1.2E-06 | 11 | 8.4  |
| Q05707 | Collagen alpha-1(XIV) chain                                          | 0.17 | 0.449 | 2.4E-02 | 8  | 5.1  |
| P02679 | Fibrinogen gamma chain                                               | 0.16 | 0.167 | 4.9E-05 | 11 | 23.8 |
| P55268 | Laminin subunit beta-2                                               | 0.16 | 0.166 | 8.0E-05 | 12 | 7.3  |
| P21980 | Protein-glutamine gamma-glutamyltransferase 2                        | 0.16 | 0.083 | 5.9E-10 | 14 | 20.7 |
| P01031 | Complement C5                                                        | 0.16 | 0.274 | 5.2E-04 | 8  | 4.7  |
| Q02511 | Alpha-crystallin B chain                                             | 0.16 | 0.055 | 2.4E-05 | 5  | 29.1 |
| Q6NZI2 | Polymerase I and transcript release factor                           | 0.16 | 0.133 | 1.5E-03 | 5  | 15.6 |
| P11166 | Solute carrier family 2, facilitated glucose transporter member 1    | 0.15 | 0.063 | 2.3E-05 | 3  | 5.5  |
| P01871 | Ig mu chain C region                                                 | 0.15 | 0.161 | 4.9E-05 | 9  | 23.9 |
| P14543 | Nidogen-1                                                            | 0.15 | 0.200 | 1.2E-06 | 10 | 8.2  |
| P02649 | Apolipoprotein E                                                     | 0.14 | 0.113 | 1.1E-05 | 12 | 40.1 |
| P04275 | von Willebrand factor                                                | 0.14 | 0.176 | 2.9E-07 | 10 | 4.1  |
| P11277 | Spectrin beta chain, erythrocytic                                    | 0.14 | 0.183 | 6.1E-03 | 9  | 5.1  |
| Q2UY09 | Collagen alpha-1(XXVII) chain                                        | 0.13 | 0.395 | 4.2E-02 | 3  | 2.3  |
| P01008 | Antithrombin-III                                                     | 0.13 | 0.134 | 5.0E-05 | 5  | 11.4 |
| P35749 | Myosin-11                                                            | 0.13 | 0.162 | 7.9E-11 | 30 | 17.1 |
| P51888 | Prolargin                                                            | 0.13 | 0.120 | 1.0E-14 | 10 | 29.3 |
| Q12805 | EGF-containing fibulin-like extracellular matrix protein 1           | 0.13 | 0.327 | 3.2E-02 | 3  | 5.7  |
| P39060 | Collagen alpha-1(XVIII) chain                                        | 0.12 | 0.224 | 3.3E-05 | 6  | 3.6  |
| P02675 | Fibrinogen beta chain                                                | 0.12 | 0.161 | 1.3E-04 | 9  | 24.8 |
| Q14195 | Dihydropyrimidinase-related protein 3                                | 0.12 | 0.159 | 2.1E-06 | 9  | 22.5 |
| Q02749 | Beta-2-glycoprotein 1                                                | 0.12 | 0.190 | 1.2E-03 | 3  | 10.4 |
| Q15661 | Tryptase alpha/beta-1                                                | 0.11 | 0.174 | 2.8E-08 | 4  | 17.1 |
| P02686 | Myelin basic protein                                                 | 0.10 | 0.226 | 6.4E-05 | 3  | 11.2 |
| P02760 | Protein AMBP                                                         | 0.10 | 0.207 | 2.6E-06 | 4  | 19.0 |
| P22748 | Carbonic anhydrase 4                                                 | 0.09 | 0.231 | 1.2E-04 | 6  | 23.1 |
| P35625 | Metalloproteinase inhibitor 3                                        | 0.09 | 0.227 | 6.4E-06 | 5  | 24.6 |
| P15088 | Mast cell carboxypeptidase A                                         | 0.09 | 0.254 | 6.4E-03 | 4  | 8.4  |
| P35555 | Fibrillin-1                                                          | 0.09 | 0.077 | 0.0E+00 | 47 | 18.7 |
| P02671 | Fibrinogen alpha chain                                               | 0.08 | 0.186 | 1.0E-05 | 8  | 10.6 |
| P02730 | Band 3 anion transport protein                                       | 0.08 | 0.287 | 5.0E-03 | 8  | 9.8  |
| P02743 | Serum amyloid P-component                                            | 0.08 | 0.290 | 3.5E-05 | 5  | 20.6 |
| P51884 | Lumican                                                              | 0.08 | 0.108 | 5.1E-13 | 10 | 30.2 |
| P10909 | Clusterin                                                            | 0.08 | 0.111 | 2.2E-15 | 15 | 26.1 |
| P04004 | Vitronectin                                                          | 0.08 | 0.150 | 2.8E-12 | 10 | 17.6 |
| P07585 | Decorin                                                              | 0.07 | 0.149 | 1.4E-05 | 7  | 19.5 |
| P21810 | Biglycan                                                             | 0.07 | 0.123 | 2.0E-11 | 7  | 19.0 |
| P21926 | CD9 antigen                                                          | 0.06 | 0.203 | 7.4E-05 | 3  | 9.6  |
| Q02748 | Complement component C9                                              | 0.06 | 0.170 | 7.5E-06 | 8  | 14.5 |
| P22352 | Glutathione peroxidase 3                                             | 0.06 | 0.160 | 1.0E-06 | 3  | 11.5 |
| P20774 | Mimectan                                                             | 0.06 | 0.206 | 2.5E-08 | 8  | 25.8 |
| P08123 | Collagen alpha-2(I) chain                                            | 0.03 | 0.167 | 1.2E-05 | 3  | 3.7  |
| P25189 | Myelin protein P0                                                    | 0.03 | 0.248 | 3.2E-08 | 7  | 27.4 |

Brown denotes change  $\geq 2$  standard deviations (SD) from the mean, yellow denotes change  $\geq 1$  SD and green highlights p values  $\leq 0.05$ . NA, not applicable, n<3 unique peptides.
