# Supplementary material for: iTRAQ Quantitative Proteomic Comparison of Metastatic and Non-Metastatic Uveal Melanoma Tumors
Source: PubMed Central journal article supplement (PMC4549237; doi:10.1371/journal.pone.0135543), 2015-08-25
Supplement: pone.0135543.s002.pdf [file pone.0135543.s002.pdf]

Supplementary Table S2

Relative Protein Abundance: Sample UM21, Metastatic

Total Proteins Quantified = 834; Log Median Protein Ratio = 0.135; Log Mean ProteinRatio = 0; Standard Deviation = 0.86

| Uni-Prot Accession | Protein                                                                        | Ratio UM/Control | Standard Deviation | p value | Unique Peptides | % Sequence Coverage |
|--------------------|--------------------------------------------------------------------------------|------------------|--------------------|---------|-----------------|---------------------|
| P16403             | Histone H1.2                                                                   | 7.53             | 0.087              | 3.8E-04 | 7               | 17.8                |
| P04004             | Vitronectin                                                                    | 6.35             | 0.135              | 3.5E-12 | 9               | 18.8                |
| P26006             | Integrin alpha-3                                                               | 6.32             | 0.051              | 3.9E-04 | 3               | 3.4                 |
| P07900             | Heat shock protein HSP 90-alpha                                                | 5.46             | 0.090              | 6.6E-08 | 12              | 13.4                |
| P08865             | 40S ribosomal protein SA                                                       | 5.30             | 0.066              | 2.1E-06 | 6               | 19.7                |
| Q9UH65             | Switch-associated protein 70                                                   | 5.19             | 0.099              | 1.5E-03 | 5               | 6.2                 |
| P04899             | Guanine nucleotide-binding protein G(i) subunit alpha-2                        | 5.10             | 0.098              | 3.0E-04 | 3               | 9.3                 |
| P40925             | Malate dehydrogenase, cytoplasmic                                              | 4.93             | 0.127              | 3.3E-06 | 3               | 10.5                |
| P19338             | Nucleolin                                                                      | 4.69             | 0.064              | 6.9E-11 | 13              | 17.2                |
| P21980             | Protein-glutamine gamma-glutamyltransferase 2                                  | 4.57             | 0.131              | 1.7E-11 | 12              | 15.4                |
| Q99798             | Aconitate hydratase, mitochondrial                                             | 4.50             | 0.078              | 5.9E-03 | 7               | 10.6                |
| P06727             | Apolipoprotein A-IV                                                            | 4.49             | 0.056              | 5.7E-04 | 10              | 20.2                |
| P08572             | Collagen alpha-2(IV) chain                                                     | 4.32             | 0.116              | 8.1E-07 | 6               | 4.4                 |
| Q16555             | Dihydropyrimidinase-related protein 2                                          | 4.30             | 0.070              | 6.6E-09 | 7               | 14.5                |
| P61160             | Actin-related protein 2                                                        | 4.21             | 0.071              | 7.4E-03 | 3               | 9.9                 |
| P06748             | Nucleophosmin                                                                  | 4.00             | 0.060              | 2.7E-06 | 6               | 17.7                |
| P30837             | Aldehyde dehydrogenase X, mitochondrial                                        | 3.94             | 0.103              | 6.5E-03 | 6               | 16.1                |
| Q00839             | Heterogeneous nuclear ribonucleoprotein U                                      | 3.82             | 0.111              | 5.0E-02 | 8               | 8.6                 |
| P25189             | Myelin protein P0                                                              | 3.75             | 0.176              | 2.1E-07 | 7               | 27.4                |
| Q9Y2X3             | Nucleolar protein 58                                                           | 3.68             | 0.172              | 1.9E-02 | 3               | 8.1                 |
| Q12905             | Interleukin enhancer-binding factor 2                                          | 3.67             | 0.062              | 3.2E-06 | 4               | 12.3                |
| Q00610             | Claathrin heavy chain 1                                                        | 3.63             | 0.049              | 9.3E-10 | 20              | 12.7                |
| P14543             | Nidogen-1                                                                      | 3.60             | 0.126              | 5.9E-08 | 8               | 6.7                 |
| P31948             | Stress-induced-phosphoprotein 1                                                | 3.54             | 0.095              | 9.5E-07 | 9               | 14.2                |
| Q9BXM0             | Periaxin                                                                       | 3.53             | 0.249              | 2.3E-02 | 5               | 1.8                 |
| P35555             | Fibrillin-1                                                                    | 3.52             | 0.050              | 0.0E+00 | 39              | 14.0                |
| P50895             | Basal cell adhesion molecule                                                   | 3.52             | 0.131              | 1.4E-03 | 4               | 9.2                 |
| P07741             | Adenine phosphoribosyltransferase                                              | 3.50             | 0.043              | 3.4E-02 | 3               | 13.9                |
| Q02818             | Nucleobindin-1                                                                 | 3.50             | 0.083              | 2.5E-03 | 4               | 11.1                |
| P16070             | CD44 antigen                                                                   | 3.42             | 0.158              | 4.3E-07 | 6               | 7.4                 |
| P00450             | Ceruloplasmin                                                                  | 3.31             | 0.139              | 6.9E-06 | 6               | 9.3                 |
| P62736             | Actin, aortic smooth muscle                                                    | 3.26             | 0.219              | 3.9E-04 | 6               | 21.0                |
| P07686             | Beta-hexosaminidase subunit beta                                               | 3.19             | 0.080              | 1.1E-05 | 8               | 12.6                |
| P98160             | Basement membrane-specific heparan sulfate proteoglycan core protein           | 3.15             | 0.059              | 0.0E+00 | 30              | 8.2                 |
| Q02878             | 60S ribosomal protein L6                                                       | 3.13             | 0.079              | 3.0E-03 | 4               | 13.9                |
| Q99536             | Synaptic vesicle membrane protein VAT-1 homolog                                | 3.03             | 0.113              | 7.3E-04 | 11              | 34.9                |
| Q15661             | Tryptase alpha/beta-1                                                          | 2.86             | 0.138              | 2.2E-09 | 4               | 17.1                |
| P04040             | Catalase                                                                       | 2.85             | 0.055              | 1.9E-04 | 3               | 6.3                 |
| P35580             | Myosin-10                                                                      | 2.84             | 0.076              | 7.6E-04 | 21              | 11.3                |
| Q08830             | Peroxiredoxin-1                                                                | 2.84             | 0.082              | 1.1E-03 | 6               | 32.2                |
| P51991             | Heterogeneous nuclear ribonucleoprotein A3                                     | 2.81             | 0.105              | 9.8E-03 | 5               | 14.3                |
| P30086             | Phosphatidylethanolamine-binding protein 1                                     | 2.59             | 0.162              | 6.5E-04 | 8               | 43.3                |
| P26373             | 60S ribosomal protein L13                                                      | 2.59             | 0.052              | 2.1E-07 | 5               | 24.2                |
| P04843             | Dolichyl-diphosphooligosaccharide--protein glycosyltransferase subunit 1       | 2.57             | 0.077              | 2.2E-03 | 9               | 16.8                |
| P13861             | cAMP-dependent protein kinase type II-alpha regulatory subunit                 | 2.54             | 0.074              | 7.6E-03 | 6               | 18.1                |
| P01024             | Complement C3                                                                  | 2.52             | 0.131              | 1.5E-06 | 13              | 7.9                 |
| P30101             | Protein disulfide-isomerase A3                                                 | 2.45             | 0.041              | 6.4E-07 | 14              | 28.9                |
| O14556             | Glyceraldehyde-3-phosphate dehydrogenase, testis-specific                      | 2.44             | 0.313              | 9.6E-04 | 3               | 9.6                 |
| P13489             | Ribonuclease inhibitor                                                         | 2.39             | 0.184              | 7.2E-03 | 6               | 13.4                |
| P62987             | Ubiquitin-60S ribosomal protein L40                                            | 6.34             | 0.695              | 5.0E-01 | 8               | 50.8                |
| P43304             | Glycerol-3-phosphate dehydrogenase, mitochondrial                              | 6.16             | NA                 | NA      | 2               | 3.4                 |
| P31930             | Cytochrome b-c1 complex subunit 1, mitochondrial                               | 5.21             | 0.099              | 2.5E-01 | 3               | 7.7                 |
| P51149             | Ras-related protein Rab-7a                                                     | 4.58             | 0.351              | 8.1E-01 | 4               | 18.8                |
| P04217             | Alpha-1B-glycoprotein                                                          | 4.51             | NA                 | NA      | 2               | 4.8                 |
| P61353             | 60S ribosomal protein L27                                                      | 4.50             | NA                 | NA      | 2               | 22.1                |
| Q16698             | 2,4-dienoyl-CoA reductase, mitochondrial                                       | 4.49             | 0.058              | 1.2E-01 | 4               | 14.3                |
| P22413             | Ectonucleotide pyrophosphatase/phosphodiesterase family member 1               | 4.41             | 0.429              | 8.9E-02 | 3               | 2.9                 |
| Q9BZZ5             | Apoptosis inhibitor 5                                                          | 4.39             | NA                 | NA      | 2               | 4.8                 |
| P39748             | Flap endonuclease 1                                                            | 4.24             | NA                 | NA      | 2               | 4.5                 |
| Q01995             | Transgelin                                                                     | 4.09             | 0.221              | 4.3E-01 | 3               | 14.4                |
| P62318             | Small nuclear ribonucleoprotein Sm D3                                          | 4.07             | NA                 | NA      | 2               | 24.6                |
| P30048             | Thioredoxin-dependent peroxide reductase, mitochondrial                        | 3.93             | 0.176              | 2.8E-01 | 4               | 19.5                |
| Q75643             | U5 small nuclear ribonucleoprotein 200 kDa helicase                            | 3.75             | NA                 | NA      | 2               | 1.2                 |
| P48426             | Phosphatidylinositol 5-phosphate 4-kinase type-2 alpha                         | 3.75             | NA                 | NA      | 2               | 6.4                 |
| Q15365             | Poly(rC)-binding protein 1                                                     | 3.74             | 0.253              | 3.8E-01 | 4               | 13.5                |
| Q05682             | Caldesmon                                                                      | 3.72             | 0.382              | 4.3E-01 | 4               | 6.6                 |
| Q14980             | Nuclear mitotic apparatus protein 1                                            | 3.68             | 0.435              | 5.3E-01 | 7               | 4.0                 |
| Q12797             | Aspartyl/asparaginyl beta-hydroxylase                                          | 3.64             | 0.440              | 8.3E-01 | 6               | 6.9                 |
| P0C0L5             | Complement C4-B                                                                | 3.50             | NA                 | NA      | 2               | 1.0                 |
| P41219             | Peripherin                                                                     | 3.39             | 0.400              | 4.7E-01 | 9               | 17.9                |
| Q8NBJ7             | Sulfatase-modifying factor 2                                                   | 3.35             | NA                 | NA      | 2               | 4.3                 |
| Q99584             | Protein S100-A13                                                               | 3.27             | 0.304              | 1.4E-01 | 5               | 41.8                |
| P69905             | Hemoglobin subunit alpha                                                       | 3.24             | 0.265              | 4.0E-01 | 6               | 58.5                |
| P45880             | Voltage-dependent anion-selective channel protein 2                            | 3.17             | 0.121              | 4.2E-01 | 6               | 24.5                |
| P26599             | Polypyrimidine tract-binding protein 1                                         | 3.12             | NA                 | NA      | 2               | 3.6                 |
| O00567             | Nucleolar protein 56                                                           | 3.12             | 0.155              | 7.0E-02 | 4               | 6.9                 |
| P16157             | Ankyrin-1                                                                      | 2.96             | NA                 | NA      | 2               | 1.5                 |
| O00483             | NADH dehydrogenase [ubiquinone] 1 alpha subcomplex subunit 4                   | 2.94             | 0.169              | 1.7E-01 | 3               | 32.1                |
| P08621             | U1 small nuclear ribonucleoprotein 70 kDa                                      | 2.88             | NA                 | NA      | 2               | 4.6                 |
| P22695             | Cytochrome b-c1 complex subunit 2, mitochondrial                               | 2.88             | 0.190              | 2.9E-01 | 3               | 7.9                 |
| P14868             | Aspartate--tRNA ligase, cytoplasmic                                            | 2.84             | 0.565              | 8.7E-01 | 3               | 7.8                 |
| P0CW22             | 40S ribosomal protein S17-like                                                 | 2.78             | NA                 | NA      | 2               | 15.6                |
| Q13177             | Serine/threonine-protein kinase PAK 2                                          | 2.78             | NA                 | NA      | 2               | 5.9                 |
| P43243             | Matrin-3                                                                       | 2.77             | 0.480              | 3.5E-01 | 3               | 4.8                 |
| P30085             | UMP-CMP kinase                                                                 | 2.70             | NA                 | NA      | 2               | 10.7                |
| Q14165             | Malectin                                                                       | 2.70             | 0.074              | 2.0E-01 | 3               | 7.9                 |
| Q92890             | Ubiquitin fusion degradation protein 1 homolog                                 | 2.68             | NA                 | NA      | 2               | 7.5                 |
| P07360             | Complement component C8 gamma chain                                            | 2.61             | NA                 | NA      | 2               | 15.8                |
| Q9Y4F1             | FERM, RhoGEF and pleckstrin domain-containing protein 1                        | 2.60             | NA                 | NA      | 2               | 1.9                 |
| P52907             | F-actin-capping protein subunit alpha-1                                        | 2.59             | NA                 | NA      | 2               | 10.5                |
| Q9NX63             | Coiled-coil-helix-coiled-coil-helix domain-containing protein 3, mitochondrial | 2.59             | NA                 | NA      | 2               | 9.3                 |
| Q7L5N1             | COP9 signalosome complex subunit 6                                             | 2.55             | NA                 | NA      | 2               | 9.5                 |
| P62158             | Calmodulin                                                                     | 2.50             | NA                 | NA      | 2               | 22.1                |
| Q00765             | Receptor expression-enhancing protein 5                                        | 2.50             | NA                 | NA      | 2               | 10.1                |
| P80723             | Brain acid soluble protein 1                                                   | 2.50             | NA                 | NA      | 2               | 9.7                 |
| P27635             | 60S ribosomal protein L10                                                      | 2.49             | 0.254              | 2.4E-01 | 4               | 19.2                |
| P43490             | Nicotinamide phosphoribosyltransferase                                         | 2.47             | 0.471              | 5.9E-01 | 4               | 7.5                 |
| P82909             | 28S ribosomal protein S36, mitochondrial                                       | 2.47             | NA                 | NA      | 2               | 24.3                |
| P06576             | ATP synthase subunit beta, mitochondrial                                       | 2.44             | 0.537              | 7.5E-01 | 12              | 29.1                |
| P08237             | ATP-dependent 6-phosphofructokinase, muscle type                               | 2.43             | 0.655              | 5.2E-01 | 4               | 5.6                 |
| Q94911             | ATP-binding cassette sub-family A member 8                                     | 2.42             | NA                 | NA      | 2               | 1.2                 |
| Q8IY95             | Transmembrane protein 192                                                      | 2.41             | NA                 | NA      | 2               | 8.5                 |

|        |                                                                             |      |       |         |    |      |
|--------|-----------------------------------------------------------------------------|------|-------|---------|----|------|
| Q16363 | Laminin subunit alpha-4                                                     | 2.41 | NA    | NA      | 2  | 1.4  |
| Q7KZF4 | Staphylococcal nuclease domain-containing protein 1                         | 2.38 | 0.466 | 7.0E-01 | 3  | 3.5  |
| P62081 | 40S ribosomal protein S7                                                    | 2.38 | NA    | NA      | 2  | 8.8  |
| O75396 | Vesicle-trafficking protein SEC22b                                          | 2.37 | 0.308 | 4.7E-01 | 3  | 16.7 |
| P05413 | Fatty acid-binding protein, heart                                           | 2.36 | 0.167 | 2.6E-04 | 5  | 33.8 |
| P02748 | Complement component C9                                                     | 2.36 | 0.172 | 4.0E-03 | 6  | 11.3 |
| P13073 | Cytochrome c oxidase subunit 4 isoform 1, mitochondrial                     | 2.35 | 0.531 | 6.4E-01 | 3  | 19.5 |
| P07910 | Heterogeneous nuclear ribonucleoproteins C1/C2                              | 2.32 | 0.151 | 1.1E-03 | 5  | 16.3 |
| P46779 | 60S ribosomal protein L28                                                   | 2.32 | 0.229 | 1.6E-01 | 3  | 19.0 |
| P27105 | Erythrocyte band 7 integral membrane protein                                | 2.31 | 0.122 | 1.8E-03 | 5  | 17.0 |
| Q9UHQ9 | NADH-cytochrome b5 reductase 1                                              | 2.30 | 0.438 | 6.7E-01 | 4  | 15.1 |
| P42858 | Huntingtin                                                                  | 2.30 | NA    | NA      | 2  | 0.5  |
| P62424 | 60S ribosomal protein L7a                                                   | 2.27 | NA    | NA      | 2  | 6.4  |
| P30049 | ATP synthase subunit delta, mitochondrial                                   | 2.25 | NA    | NA      | 2  | 13.7 |
| Q12805 | EGF-containing fibulin-like extracellular matrix protein 1                  | 2.22 | NA    | NA      | 2  | 3.9  |
| P61626 | Lysozyme C                                                                  | 2.22 | NA    | NA      | 2  | 12.8 |
| P05198 | Eukaryotic translation initiation factor 2 subunit 1                        | 2.22 | NA    | NA      | 2  | 7.0  |
| P24941 | Cyclin-dependent kinase 2                                                   | 2.22 | 0.514 | 1.7E-01 | 3  | 11.7 |
| O75131 | Copine-3                                                                    | 2.20 | 0.142 | 2.6E-02 | 4  | 7.6  |
| P11142 | Heat shock cognate 71 kDa protein                                           | 2.19 | 0.068 | 6.6E-05 | 10 | 13.8 |
| P02549 | Spectrin alpha chain, erythrocytic 1                                        | 2.17 | 0.180 | 2.9E-03 | 5  | 2.5  |
| O14980 | Exportin-1                                                                  | 2.15 | NA    | NA      | 2  | 2.2  |
| Q9C0E8 | Protein lunapark                                                            | 2.15 | NA    | NA      | 2  | 3.7  |
| Q01844 | RNA-binding protein EWS                                                     | 2.15 | NA    | NA      | 2  | 2.4  |
| P08294 | Extracellular superoxide dismutase [Cu-Zn]                                  | 2.13 | 0.197 | 5.6E-02 | 3  | 15.4 |
| P61247 | 40S ribosomal protein S3a                                                   | 2.12 | 0.211 | 1.9E-01 | 5  | 20.5 |
| O43491 | Band 4.1-like protein 2                                                     | 2.09 | 0.204 | 3.2E-02 | 3  | 3.1  |
| P27348 | 14-3-3 protein theta                                                        | 2.07 | 0.109 | 7.7E-03 | 4  | 14.3 |
| Q14152 | Eukaryotic translation initiation factor 3 subunit A                        | 2.07 | 0.097 | 6.0E-02 | 5  | 4.1  |
| P22626 | Heterogeneous nuclear ribonucleoproteins A2/B1                              | 2.06 | 0.052 | 2.1E-05 | 12 | 31.7 |
| P61026 | Ras-related protein Rab-10                                                  | 2.05 | 0.475 | 9.5E-01 | 3  | 12.5 |
| P16615 | Sarcoplasmic/endoplasmic reticulum calcium ATPase 2                         | 2.04 | 0.070 | 3.1E-02 | 6  | 6.0  |
| P51810 | G-protein coupled receptor 143                                              | 2.03 | 0.064 | 6.7E-06 | 4  | 11.1 |
| P23526 | Adenosylhomocysteinase                                                      | 2.01 | 0.196 | 6.9E-05 | 7  | 16.2 |
| O00571 | ATP-dependent RNA helicase DDX3X                                            | 2.01 | NA    | NA      | 2  | 3.2  |
| O43301 | Heat shock 70 kDa protein 12A                                               | 2.01 | 0.148 | 8.5E-04 | 3  | 5.5  |
| P10155 | 60 kDa SS-A/Ro ribonucleoprotein                                            | 2.01 | NA    | NA      | 2  | 3.2  |
| P62917 | 60S ribosomal protein L8                                                    | 2.00 | NA    | NA      | 2  | 8.9  |
| P22234 | Multifunctional protein ADE2                                                | 2.00 | NA    | NA      | 2  | 4.9  |
| P30464 | HLA class I histocompatibility antigen, B-15 alpha chain                    | 2.00 | 0.313 | 1.3E-01 | 4  | 16.0 |
| P19971 | Thymidine phosphorylase                                                     | 1.99 | 3.632 | 6.1E-01 | 3  | 8.3  |
| P46926 | Glucosamine-6-phosphate isomerase 1                                         | 1.98 | 0.086 | 2.5E-04 | 5  | 16.3 |
| Q86VP6 | Cullin-associated NEDD8-dissociated protein 1                               | 1.97 | 0.309 | 7.3E-02 | 4  | 3.5  |
| Q9BSJ8 | Extended synaptotagmin-1                                                    | 1.96 | NA    | NA      | 2  | 2.2  |
| O75369 | Filamin-B                                                                   | 1.96 | 0.184 | 2.5E-03 | 7  | 4.0  |
| P20700 | Lamin-B1                                                                    | 1.94 | 0.990 | 5.6E-01 | 5  | 8.2  |
| P62753 | 40S ribosomal protein S6                                                    | 1.94 | 0.089 | 1.9E-01 | 4  | 15.3 |
| P61604 | 10 kDa heat shock protein, mitochondrial                                    | 1.93 | 0.128 | 3.9E-03 | 3  | 27.5 |
| P05556 | Integrin beta-1                                                             | 1.93 | 0.161 | 1.3E-02 | 7  | 9.0  |
| Q9UMS4 | Pre-mRNA-processing factor 19                                               | 1.92 | NA    | NA      | 2  | 6.7  |
| P46781 | 40S ribosomal protein S9                                                    | 1.92 | 0.525 | 3.8E-01 | 4  | 18.6 |
| P02654 | Apolipoprotein C-I                                                          | 1.91 | NA    | NA      | 2  | 24.1 |
| Q53GQ0 | Estradiol 17-beta-dehydrogenase 12                                          | 1.91 | NA    | NA      | 2  | 8.3  |
| P42765 | 3-ketoacyl-CoA thiolase, mitochondrial                                      | 1.91 | 0.227 | 8.6E-01 | 3  | 9.1  |
| O95298 | NADH dehydrogenase [ubiquinone] 1 subunit C2                                | 1.90 | NA    | NA      | 2  | 16.8 |
| Q99538 | Legumain                                                                    | 1.90 | NA    | NA      | 2  | 5.1  |
| Q15819 | Ubiquitin-conjugating enzyme E2 variant 2                                   | 1.90 | 0.143 | 4.2E-02 | 4  | 24.8 |
| P14618 | Pyruvate kinase PKM                                                         | 1.90 | 0.068 | 7.3E-13 | 11 | 23.2 |
| Q15393 | Splicing factor 3B subunit 3                                                | 1.90 | NA    | NA      | 2  | 2.1  |
| O76003 | Glutaredoxin-3                                                              | 1.89 | NA    | NA      | 2  | 3.9  |
| P17900 | Ganglioside GM2 activator                                                   | 1.89 | NA    | NA      | 2  | 7.8  |
| Q07666 | KH domain-containing, RNA-binding, signal transduction-associated protein 1 | 1.88 | 0.112 | 7.4E-02 | 4  | 7.9  |
| P14314 | Glucosidase 2 subunit beta                                                  | 1.88 | 0.140 | 1.1E-02 | 5  | 8.7  |
| P53990 | IST1 homolog                                                                | 1.87 | 0.217 | 4.5E-02 | 5  | 10.7 |
| P54652 | Heat shock-related 70 kDa protein 2                                         | 1.86 | 0.125 | 1.9E-02 | 9  | 15.0 |
| P04406 | Glyceraldehyde-3-phosphate dehydrogenase                                    | 1.85 | 0.067 | 1.4E-13 | 9  | 30.7 |
| P10321 | HLA class I histocompatibility antigen, Cw-7 alpha chain                    | 1.84 | NA    | NA      | 2  | 6.3  |
| P57729 | Ras-related protein Rab-38                                                  | 1.84 | 0.128 | 1.5E-05 | 4  | 17.1 |
| P33121 | Long-chain-fatty-acid--CoA ligase 1                                         | 1.83 | 0.130 | 2.0E-02 | 4  | 6.6  |
| Q02543 | 60S ribosomal protein L18a                                                  | 1.82 | NA    | NA      | 2  | 10.2 |
| Q6UVK1 | Chondroitin sulfate proteoglycan 4                                          | 1.82 | NA    | NA      | 2  | 1.2  |
| Q01105 | Protein SET                                                                 | 1.82 | 0.161 | 1.1E-03 | 6  | 21.4 |
| P39019 | 40S ribosomal protein S19                                                   | 1.82 | 0.033 | 1.4E-03 | 5  | 25.5 |
| Q14624 | Inter-alpha-trypsin inhibitor heavy chain H4                                | 1.81 | 0.240 | 3.7E-02 | 4  | 4.1  |
| P78371 | T-complex protein 1 subunit beta                                            | 1.81 | 0.134 | 7.4E-02 | 7  | 12.1 |
| P26640 | Valine--tRNA ligase                                                         | 1.81 | NA    | NA      | 2  | 2.1  |
| P04179 | Superoxide dismutase [Mn], mitochondrial                                    | 1.80 | 2.468 | 9.0E-01 | 5  | 17.6 |
| P10644 | cAMP-dependent protein kinase type I-alpha regulatory subunit               | 1.80 | 0.069 | 2.7E-02 | 4  | 12.1 |
| P35998 | 26S protease regulatory subunit 7                                           | 1.80 | NA    | NA      | 2  | 5.1  |
| Q8WVC6 | Dephospho-CoA kinase domain-containing protein                              | 1.80 | NA    | NA      | 2  | 10.0 |
| P07585 | Decorin                                                                     | 1.80 | 0.065 | 1.9E-04 | 3  | 8.1  |
| P25705 | ATP synthase subunit alpha, mitochondrial                                   | 1.80 | 0.672 | 1.6E-01 | 11 | 22.1 |
| P25786 | Proteasome subunit alpha type-1                                             | 1.79 | 0.206 | 2.7E-03 | 5  | 20.2 |
| P55072 | Transitional endoplasmic reticulum ATPase                                   | 1.78 | 0.113 | 1.5E-01 | 13 | 17.0 |
| Q99832 | T-complex protein 1 subunit eta                                             | 1.78 | 0.285 | 7.6E-01 | 5  | 10.5 |
| Q9HBL0 | Tensin-1                                                                    | 1.78 | 0.036 | 1.7E-04 | 3  | 2.1  |
| P02743 | Serum amyloid P-component                                                   | 1.78 | 0.186 | 4.6E-07 | 6  | 23.3 |
| P31150 | Rab GDP dissociation inhibitor alpha                                        | 1.77 | NA    | NA      | 2  | 5.4  |
| Q92905 | COP9 signalosome complex subunit 5                                          | 1.77 | NA    | NA      | 2  | 6.9  |
| P54819 | Adenylate kinase 2, mitochondrial                                           | 1.76 | 0.085 | 2.9E-04 | 5  | 24.3 |
| P0C0S8 | Histone H2A type 1                                                          | 1.74 | 0.164 | 1.6E-01 | 3  | 28.5 |
| P09211 | Glutathione S-transferase P                                                 | 1.73 | 0.153 | 4.5E-01 | 4  | 26.7 |
| P01857 | Ig gamma-1 chain C region                                                   | 1.73 | 0.072 | 8.2E-03 | 4  | 18.5 |
| P16930 | Fumarylacetoacetase                                                         | 1.73 | NA    | NA      | 2  | 5.3  |
| P01903 | HLA class II histocompatibility antigen, DR alpha chain                     | 1.72 | NA    | NA      | 2  | 9.8  |
| P23381 | Tryptophan--tRNA ligase, cytoplasmic                                        | 1.71 | 0.189 | 5.0E-03 | 5  | 9.6  |
| P24844 | Myosin regulatory light polypeptide 9                                       | 1.70 | NA    | NA      | 2  | 12.2 |
| Q96C19 | EF-hand domain-containing protein D2                                        | 1.70 | NA    | NA      | 2  | 6.3  |
| P15311 | Ezrin                                                                       | 1.70 | NA    | NA      | 2  | 2.6  |
| P18669 | Phosphoglycerate mutase 1                                                   | 1.70 | 0.087 | 6.5E-05 | 5  | 33.1 |
| Q9NY33 | Dipeptidyl peptidase 3                                                      | 1.69 | NA    | NA      | 2  | 3.5  |
| Q8N5K1 | CDGSH iron-sulfur domain-containing protein 2                               | 1.69 | 0.302 | 3.4E-01 | 3  | 20.7 |
| P29966 | Myristoylated alanine-rich C-kinase substrate                               | 1.67 | 0.487 | 6.4E-01 | 4  | 15.7 |
| Q86UE4 | Protein LYRIC                                                               | 1.67 | NA    | NA      | 2  | 4.0  |
| Q96JB5 | CDK5 regulatory subunit-associated protein 3                                | 1.66 | NA    | NA      | 2  | 3.0  |
| P02686 | Myelin basic protein                                                        | 1.66 | NA    | NA      | 2  | 7.2  |
| P11586 | C-1-tetrahydrofolate synthase, cytoplasmic                                  | 1.65 | 0.049 | 1.5E-04 | 7  | 9.2  |
| O14735 | CDP-diacylglycerol--inositol 3-phosphatidyltransferase                      | 1.65 | NA    | NA      | 2  | 9.9  |
| P04275 | von Willebrand factor                                                       | 1.65 | 0.119 | 4.4E-07 | 11 | 4.2  |

|        |                                                                          |      |        |         |    |      |
|--------|--------------------------------------------------------------------------|------|--------|---------|----|------|
| P50402 | Emerin                                                                   | 1.65 | NA     | NA      | 2  | 9.8  |
| P08238 | Heat shock protein HSP 90-beta                                           | 1.64 | 0.132  | 1.7E-03 | 7  | 10.1 |
| Q969X5 | Endoplasmic reticulum-Golgi intermediate compartment protein 1           | 1.64 | NA     | NA      | 2  | 7.9  |
| O43399 | Tumor protein D54                                                        | 1.64 | NA     | NA      | 2  | 11.7 |
| P48047 | ATP synthase subunit O, mitochondrial                                    | 1.64 | 0.113  | 4.4E-02 | 3  | 16.0 |
| O15400 | Syntaxin-7                                                               | 1.64 | 0.119  | 6.2E-06 | 4  | 17.2 |
| P61421 | V-type proton ATPase subunit d 1                                         | 1.63 | NA     | NA      | 2  | 5.4  |
| P10909 | Clusterin                                                                | 1.63 | 0.103  | 1.6E-15 | 14 | 28.5 |
| P01860 | Ig gamma-3 chain C region                                                | 1.63 | 24.364 | 7.2E-01 | 3  | 6.4  |
| P50914 | 60S ribosomal protein L14                                                | 1.62 | NA     | NA      | 2  | 10.7 |
| P00167 | Cytochrome b5                                                            | 1.62 | 0.208  | 3.9E-02 | 3  | 32.1 |
| P00338 | L-lactate dehydrogenase A chain                                          | 1.61 | 0.109  | 1.6E-07 | 7  | 17.8 |
| Q15008 | 26S proteasome non-ATPase regulatory subunit 6                           | 1.61 | NA     | NA      | 2  | 5.9  |
| P60866 | 40S ribosomal protein S20                                                | 1.61 | 0.120  | 8.0E-02 | 3  | 25.2 |
| P83731 | 60S ribosomal protein L24                                                | 1.61 | NA     | NA      | 2  | 13.4 |
| P11177 | Pyruvate dehydrogenase E1 component subunit beta, mitochondrial          | 1.61 | NA     | NA      | 2  | 4.2  |
| Q9NYU2 | UDP-glucose:glycoprotein glucosyltransferase 1                           | 1.61 | 0.039  | 1.1E-01 | 3  | 2.2  |
| O75915 | PRA1 family protein 3                                                    | 1.59 | NA     | NA      | 2  | 9.6  |
| P18206 | Vinculin                                                                 | 1.59 | 0.108  | 1.7E-06 | 11 | 10.1 |
| P09429 | High mobility group protein B1                                           | 1.59 | 0.148  | 5.4E-02 | 5  | 21.9 |
| O94832 | Unconventional myosin-Id                                                 | 1.58 | 0.403  | 4.0E-01 | 4  | 4.2  |
| P43686 | 26S protease regulatory subunit 6B                                       | 1.57 | NA     | NA      | 2  | 6.0  |
| P11021 | 78 kDa glucose-regulated protein                                         | 1.56 | 1.263  | 1.0E+00 | 17 | 26.1 |
| P21912 | Succinate dehydrogenase [ubiquinone] iron-sulfur subunit, mitochondrial  | 1.56 | 19.919 | 5.1E-01 | 5  | 17.5 |
| P36578 | 60S ribosomal protein L4                                                 | 1.56 | 0.180  | 1.1E-01 | 7  | 15.2 |
| P51858 | Hepatoma-derived growth factor                                           | 1.56 | 0.189  | 3.0E-02 | 4  | 18.3 |
| Q10567 | AP-1 complex subunit beta-1                                              | 1.55 | NA     | NA      | 2  | 2.4  |
| P53597 | Succinyl-CoA ligase [ADP/GDP-forming] subunit alpha, mitochondrial       | 1.55 | NA     | NA      | 2  | 6.9  |
| P51884 | Lumican                                                                  | 1.55 | 0.069  | 0.0E+00 | 7  | 20.4 |
| P07737 | Profilin-1                                                               | 1.54 | 0.154  | 4.5E-06 | 4  | 26.4 |
| P37837 | Transaldolase                                                            | 1.54 | 0.082  | 9.3E-03 | 5  | 13.1 |
| P09497 | Claathrin light chain B                                                  | 1.54 | NA     | NA      | 2  | 8.3  |
| O60568 | Procollagen-lysine,2-oxoglutarate 5-dioxygenase 3                        | 1.53 | NA     | NA      | 2  | 3.9  |
| P09936 | Ubiquitin carboxyl-terminal hydrolase isozyme L1                         | 1.53 | 0.906  | 3.6E-01 | 4  | 21.5 |
| P49458 | Signal recognition particle 9 kDa protein                                | 1.52 | NA     | NA      | 2  | 22.1 |
| O14745 | Na(+)/H(+) exchange regulatory cofactor NHE-RF1                          | 1.52 | NA     | NA      | 2  | 8.7  |
| Q16891 | Mitochondrial inner membrane protein                                     | 1.52 | 1.413  | 6.9E-01 | 10 | 13.9 |
| P07602 | Prosaposin                                                               | 1.52 | 0.132  | 1.7E-01 | 4  | 6.9  |
| P62244 | 40S ribosomal protein S15a                                               | 1.52 | 0.089  | 1.7E-01 | 3  | 18.5 |
| P40763 | Signal transducer and activator of transcription 3                       | 1.51 | 9.412  | 8.5E-01 | 3  | 4.4  |
| P07942 | Laminin subunit beta-1                                                   | 1.51 | 0.116  | 5.1E-04 | 3  | 2.1  |
| P06396 | Gelsolin                                                                 | 1.50 | 0.147  | 7.2E-03 | 9  | 10.2 |
| Q07954 | Prolow-density lipoprotein receptor-related protein 1                    | 1.50 | 0.060  | 4.4E-06 | 14 | 3.8  |
| P55809 | Succinyl-CoA:3-ketoacid coenzyme A transferase 1, mitochondrial          | 1.50 | 0.161  | 9.0E-02 | 4  | 6.5  |
| P25398 | 40S ribosomal protein S12                                                | 1.49 | 0.075  | 7.4E-04 | 3  | 25.0 |
| P49327 | Fatty acid synthase                                                      | 1.48 | NA     | NA      | 2  | 1.0  |
| P06744 | Glucose-6-phosphate isomerase                                            | 1.47 | 0.162  | 1.4E-04 | 6  | 10.8 |
| Q92896 | Golgi apparatus protein 1                                                | 1.47 | 0.606  | 8.3E-01 | 3  | 3.0  |
| Q06323 | Proteasome activator complex subunit 1                                   | 1.47 | 0.116  | 1.8E-04 | 6  | 26.1 |
| O75367 | Core histone macro-H2A.1                                                 | 1.47 | 0.107  | 3.3E-02 | 7  | 23.9 |
| Q05707 | Collagen alpha-1(XIV) chain                                              | 1.47 | 0.164  | 7.9E-05 | 7  | 4.1  |
| P08107 | Heat shock 70 kDa protein 1A/1B                                          | 1.47 | 0.063  | 4.7E-04 | 8  | 15.3 |
| P50502 | Hsc70-interacting protein                                                | 1.47 | NA     | NA      | 2  | 5.1  |
| O75390 | Citrate synthase, mitochondrial                                          | 1.47 | 0.111  | 8.5E-03 | 5  | 11.8 |
| Q9P2E9 | Ribosome-binding protein 1                                               | 1.46 | 0.078  | 5.2E-04 | 9  | 7.4  |
| P61204 | ADP-ribosylation factor 3                                                | 1.46 | NA     | NA      | 2  | 10.5 |
| Q13185 | Chromobox protein homolog 3                                              | 1.46 | NA     | NA      | 2  | 10.9 |
| P14854 | Cytochrome c oxidase subunit 6B1                                         | 1.46 | 0.083  | 1.9E-01 | 3  | 24.4 |
| Q15084 | Protein disulfide-isomerase A6                                           | 1.46 | 0.042  | 3.2E-05 | 5  | 12.5 |
| P02042 | Hemoglobin subunit delta                                                 | 1.46 | 0.026  | 6.3E-02 | 3  | 30.6 |
| P28066 | Proteasome subunit alpha type-5                                          | 1.46 | NA     | NA      | 2  | 12.0 |
| Q07955 | Serine/arginine-rich splicing factor 1                                   | 1.45 | 0.126  | 4.8E-03 | 3  | 8.5  |
| P42566 | Epidermal growth factor receptor substrate 15                            | 1.45 | NA     | NA      | 2  | 2.8  |
| Q16895 | Histone H3.1t                                                            | 1.44 | 0.086  | 3.4E-04 | 3  | 14.7 |
| P13796 | Plastin-2                                                                | 1.44 | NA     | NA      | 2  | 3.0  |
| P13987 | CD59 glycoprotein                                                        | 1.44 | NA     | NA      | 2  | 15.6 |
| O75347 | Tubulin-specific chaperone A                                             | 1.44 | 1.129  | 2.3E-01 | 3  | 26.9 |
| Q08211 | ATP-dependent RNA helicase A                                             | 1.43 | 0.120  | 3.0E-02 | 6  | 5.7  |
| P16219 | Short-chain specific acyl-CoA dehydrogenase, mitochondrial               | 1.43 | NA     | NA      | 2  | 4.6  |
| Q14956 | Transmembrane glycoprotein NMB                                           | 1.43 | 4.826  | 2.0E-01 | 4  | 7.5  |
| P08123 | Collagen alpha-2(I) chain                                                | 1.43 | NA     | NA      | 2  | 2.4  |
| P00747 | Plasminogen                                                              | 1.43 | 0.215  | 2.3E-02 | 5  | 9.4  |
| O15455 | Toll-like receptor 3                                                     | 1.43 | NA     | NA      | 2  | 2.0  |
| B5ME19 | Eukaryotic translation initiation factor 3 subunit C-like protein        | 1.43 | NA     | NA      | 2  | 2.1  |
| Q13263 | Transcription intermediary factor 1-beta                                 | 1.43 | NA     | NA      | 2  | 1.9  |
| P63000 | Ras-related C3 botulinum toxin substrate 1                               | 1.43 | 0.044  | 2.4E-02 | 4  | 24.5 |
| P17844 | Probable ATP-dependent RNA helicase DDX5                                 | 1.42 | 0.014  | 6.9E-03 | 3  | 4.7  |
| P11047 | Laminin subunit gamma-1                                                  | 1.42 | 0.103  | 3.4E-09 | 12 | 7.8  |
| Q9NZM1 | Myoferlin                                                                | 1.42 | 0.076  | 1.9E-04 | 8  | 4.4  |
| P02652 | Apolipoprotein A-II                                                      | 1.42 | NA     | NA      | 2  | 17.0 |
| P13667 | Protein disulfide-isomerase A4                                           | 1.42 | 0.225  | 4.8E-01 | 5  | 8.5  |
| P16401 | Histone H1.5                                                             | 1.42 | 0.395  | 6.1E-02 | 3  | 9.7  |
| Q96AG4 | Leucine-rich repeat-containing protein 59                                | 1.42 | 0.224  | 2.6E-02 | 4  | 12.7 |
| Q15435 | Protein phosphatase 1 regulatory subunit 7                               | 1.42 | NA     | NA      | 2  | 5.3  |
| Q86UP2 | Kinectin                                                                 | 1.42 | 0.356  | 1.2E-01 | 8  | 7.3  |
| P05388 | 60S acidic ribosomal protein P0                                          | 1.41 | 0.053  | 8.6E-02 | 3  | 10.7 |
| P39687 | Acidic leucine-rich nuclear phosphoprotein 32 family member A            | 1.40 | 0.165  | 2.3E-01 | 4  | 12.9 |
| P35232 | Prohibitin                                                               | 1.40 | 0.062  | 3.2E-03 | 7  | 25.4 |
| P26639 | Threonine-tRNA ligase, cytoplasmic                                       | 1.40 | NA     | NA      | 2  | 2.9  |
| P61158 | Actin-related protein 3                                                  | 1.40 | 0.082  | 1.5E-02 | 6  | 16.3 |
| P09496 | Claathrin light chain A                                                  | 1.39 | 0.525  | 7.0E-01 | 3  | 8.9  |
| P11310 | Medium-chain specific acyl-CoA dehydrogenase, mitochondrial              | 1.39 | 0.159  | 2.0E-01 | 3  | 7.4  |
| P55145 | Mesencephalic astrocyte-derived neurotrophic factor                      | 1.39 | NA     | NA      | 2  | 11.0 |
| P09622 | Dihydropyridyl dehydrogenase, mitochondrial                              | 1.39 | NA     | NA      | 2  | 3.3  |
| P31040 | Succinate dehydrogenase [ubiquinone] flavoprotein subunit, mitochondrial | 1.38 | 0.059  | 3.2E-02 | 3  | 4.8  |
| O60716 | Catenin delta-1                                                          | 1.37 | NA     | NA      | 2  | 2.0  |
| P09382 | Galectin-1                                                               | 1.37 | 0.074  | 4.9E-02 | 5  | 34.8 |
| Q96QK1 | Vacuolar protein sorting-associated protein 35                           | 1.37 | NA     | NA      | 2  | 2.3  |
| P50990 | T-complex protein 1 subunit theta                                        | 1.36 | 0.269  | 7.3E-01 | 12 | 22.3 |
| P14866 | Heterogeneous nuclear ribonucleoprotein L                                | 1.36 | 0.248  | 2.4E-01 | 4  | 8.5  |
| P61225 | Ras-related protein Rap-2b                                               | 1.36 | 0.075  | 7.1E-02 | 3  | 16.4 |
| Q15019 | Septin-2                                                                 | 1.36 | 0.145  | 3.3E-02 | 5  | 21.9 |
| Q14697 | Neutral alpha-glucosidase AB                                             | 1.36 | 0.162  | 9.1E-02 | 10 | 11.8 |
| Q87AQ2 | SWI/SNF complex subunit SMARCC2                                          | 1.36 | 0.069  | 4.6E-02 | 3  | 2.4  |
| P02765 | Alpha-2-HS-glycoprotein                                                  | 1.36 | NA     | NA      | 2  | 3.5  |
| P22105 | Tenascin-X                                                               | 1.35 | NA     | NA      | 2  | 0.8  |
| Q9LHG3 | Prenylcysteine oxidase 1                                                 | 1.35 | 0.060  | 1.4E-02 | 4  | 8.1  |
| Q9BPX5 | Actin-related protein 2/3 complex subunit 5-like protein                 | 1.35 | NA     | NA      | 2  | 20.3 |
| Q16531 | DNA damage-binding protein 1                                             | 1.34 | NA     | NA      | 2  | 1.5  |

|        |                                                                               |      |       |         |    |      |
|--------|-------------------------------------------------------------------------------|------|-------|---------|----|------|
| P62826 | GTP-binding nuclear protein Ran                                               | 1.34 | NA    | NA      | 2  | 9.7  |
| P21399 | Cytoplasmic aconitate hydratase                                               | 1.34 | NA    | NA      | 2  | 2.2  |
| O95299 | NADH dehydrogenase [ubiquinone] 1 alpha subcomplex subunit 10, mitochondrial  | 1.34 | 1.972 | 4.2E-01 | 3  | 7.9  |
| P39656 | Dolichyl-diphosphooligosaccharide--protein glycosyltransferase 48 kDa subunit | 1.33 | 0.341 | 3.1E-01 | 3  | 7.2  |
| Q8N1G4 | Leucine-rich repeat-containing protein 47                                     | 1.32 | 0.198 | 1.6E-01 | 5  | 10.8 |
| P49189 | 4-trimethylaminobutylaldehyde dehydrogenase                                   | 1.32 | NA    | NA      | 2  | 2.6  |
| P0CG05 | Ig lambda-b2 chain C regions                                                  | 1.31 | NA    | NA      | 2  | 23.6 |
| Q9UJS0 | Calcium-binding mitochondrial carrier protein Aralar2                         | 1.31 | NA    | NA      | 2  | 3.3  |
| P27797 | Calreticulin                                                                  | 1.31 | 0.490 | 7.6E-01 | 4  | 8.6  |
| P17643 | 5,6-dihydroxyindole-2-carboxylic acid oxidase                                 | 1.31 | 0.113 | 6.7E-03 | 7  | 11.5 |
| P46940 | Ras GTPase-activating-like protein IQGAP1                                     | 1.31 | 0.093 | 2.2E-05 | 17 | 11.1 |
| P21283 | V-type proton ATPase subunit C 1                                              | 1.30 | NA    | NA      | 2  | 3.9  |
| P00387 | NADH-cytochrome b5 reductase 3                                                | 1.30 | 0.164 | 1.1E-01 | 7  | 22.3 |
| P62241 | 40S ribosomal protein S8                                                      | 1.29 | NA    | NA      | 2  | 5.8  |
| Q9Y2S2 | Lambda-crystallin homolog                                                     | 1.29 | NA    | NA      | 2  | 6.3  |
| P47756 | F-actin-capping protein subunit beta                                          | 1.29 | 0.326 | 5.0E-01 | 3  | 15.9 |
| P50454 | Serpin H1                                                                     | 1.28 | 0.088 | 5.6E-01 | 4  | 10.0 |
| Q9NSE4 | Isoleucine--tRNA ligase, mitochondrial                                        | 1.28 | 2.135 | 7.5E-01 | 4  | 5.9  |
| Q9HDC9 | Adipocyte plasma membrane-associated protein                                  | 1.28 | 0.235 | 3.7E-01 | 3  | 7.9  |
| P68871 | Hemoglobin subunit beta                                                       | 1.28 | 0.086 | 2.7E-02 | 4  | 38.8 |
| P01009 | Alpha-1-antitrypsin                                                           | 1.27 | 0.154 | 2.5E-01 | 8  | 22.0 |
| P62263 | 40S ribosomal protein S14                                                     | 1.27 | 0.073 | 1.8E-03 | 3  | 29.8 |
| O95292 | Vesicle-associated membrane protein-associated protein B/C                    | 1.27 | 0.284 | 4.6E-02 | 4  | 19.3 |
| P13671 | Complement component C6                                                       | 1.27 | NA    | NA      | 2  | 2.7  |
| Q13200 | 26S proteasome non-ATPase regulatory subunit 2                                | 1.27 | NA    | NA      | 2  | 2.3  |
| O15230 | Laminin subunit alpha-5                                                       | 1.27 | 0.127 | 4.2E-05 | 10 | 3.2  |
| Q1KMD3 | Heterogeneous nuclear ribonucleoprotein U-like protein 2                      | 1.27 | NA    | NA      | 2  | 2.5  |
| Q9Y411 | Unconventional myosin-Va                                                      | 1.27 | 0.103 | 6.1E-03 | 7  | 3.8  |
| P52272 | Heterogeneous nuclear ribonucleoprotein M                                     | 1.26 | 0.081 | 9.2E-03 | 8  | 13.4 |
| Q03135 | Caveolin-1                                                                    | 1.26 | NA    | NA      | 2  | 13.5 |
| P12956 | X-ray repair cross-complementing protein 6                                    | 1.26 | 0.132 | 2.3E-02 | 8  | 13.5 |
| P67936 | Tropomyosin alpha-4 chain                                                     | 1.26 | 0.230 | 1.4E-02 | 8  | 25.8 |
| Q9GZS3 | WD repeat-containing protein 61                                               | 1.26 | NA    | NA      | 2  | 7.5  |
| Q92945 | Far upstream element-binding protein 2                                        | 1.26 | 0.119 | 4.9E-03 | 7  | 12.0 |
| Q9Y230 | RuvB-like 2                                                                   | 1.26 | 0.078 | 5.8E-02 | 3  | 6.7  |
| P07099 | Epoxide hydrolase 1                                                           | 1.26 | 0.128 | 7.4E-03 | 6  | 13.6 |
| P22059 | Oxysterol-binding protein 1                                                   | 1.26 | 0.134 | 9.4E-02 | 3  | 4.0  |
| O00299 | Chloride intracellular channel protein 1                                      | 1.26 | NA    | NA      | 2  | 6.2  |
| Q9Y4L1 | Hypoxia up-regulated protein 1                                                | 1.26 | 0.183 | 3.8E-01 | 4  | 4.1  |
| P68366 | Tubulin alpha-4A chain                                                        | 1.26 | NA    | NA      | 2  | 4.2  |
| Q15181 | Inorganic pyrophosphatase                                                     | 1.25 | 0.090 | 3.6E-03 | 4  | 13.5 |
| Q9UBQ7 | Glyoxylate reductase/hydroxyypyruvate reductase                               | 1.25 | NA    | NA      | 2  | 4.6  |
| Q9BS40 | Latexin                                                                       | 1.25 | NA    | NA      | 2  | 12.2 |
| Q3S569 | Mitochondrial 10-formyltetrahydrofolate dehydrogenase                         | 1.25 | NA    | NA      | 2  | 2.3  |
| P61769 | Beta-2-microglobulin                                                          | 1.24 | NA    | NA      | 2  | 10.9 |
| Q92841 | Probable ATP-dependent RNA helicase DDX17                                     | 1.24 | 0.114 | 4.7E-01 | 3  | 5.3  |
| P40429 | 60S ribosomal protein L13a                                                    | 1.24 | 0.307 | 8.1E-01 | 5  | 14.8 |
| Q14195 | Dihydropyrimidinase-related protein 3                                         | 1.24 | 0.122 | 4.2E-05 | 8  | 17.0 |
| P38606 | V-type proton ATPase catalytic subunit A                                      | 1.24 | NA    | NA      | 2  | 3.2  |
| P11413 | Glucose-6-phosphate 1-dehydrogenase                                           | 1.23 | NA    | NA      | 2  | 3.7  |
| Q94875 | Sorbin and SH3 domain-containing protein 2                                    | 1.23 | 0.596 | 1.5E-01 | 3  | 3.6  |
| P24752 | Acetyl-CoA acetyltransferase, mitochondrial                                   | 1.23 | 0.200 | 7.9E-02 | 3  | 8.0  |
| P00352 | Retinal dehydrogenase 1                                                       | 1.23 | NA    | NA      | 2  | 3.6  |
| P21281 | V-type proton ATPase subunit B, brain isoform                                 | 1.22 | 3.080 | 4.9E-01 | 3  | 7.4  |
| P23946 | Chymase                                                                       | 1.22 | 0.421 | 8.3E-03 | 4  | 21.1 |
| Q15907 | Ras-related protein Rab-11B                                                   | 1.22 | 0.183 | 5.9E-02 | 3  | 12.8 |
| P07358 | Complement component C8 beta chain                                            | 1.22 | NA    | NA      | 2  | 2.0  |
| P02774 | Vitamin D-binding protein                                                     | 1.22 | NA    | NA      | 2  | 3.4  |
| O95782 | AP-2 complex subunit alpha-1                                                  | 1.22 | NA    | NA      | 2  | 1.9  |
| P62873 | Guanine nucleotide-binding protein G(I)/G(S)/G(T) subunit beta-1              | 1.21 | NA    | NA      | 2  | 6.8  |
| P20774 | Mimecan                                                                       | 1.21 | 0.152 | 2.3E-10 | 7  | 21.8 |
| P04844 | Dolichyl-diphosphooligosaccharide--protein glycosyltransferase subunit 2      | 1.21 | 0.038 | 1.1E-02 | 3  | 5.4  |
| P29590 | Protein PML                                                                   | 1.21 | NA    | NA      | 2  | 2.4  |
| P05141 | ADP/ATP translocase 2                                                         | 1.21 | 0.097 | 7.6E-03 | 4  | 13.1 |
| P30405 | Peptidyl-prolyl cis-trans isomerase F, mitochondrial                          | 1.21 | NA    | NA      | 2  | 7.7  |
| P61981 | 14-3-3 protein gamma                                                          | 1.21 | NA    | NA      | 2  | 9.7  |
| Q13423 | NAD(P) transhydrogenase, mitochondrial                                        | 1.20 | 0.136 | 2.6E-02 | 7  | 7.4  |
| Q969G5 | Protein kinase C delta-binding protein                                        | 1.20 | 0.070 | 7.4E-03 | 3  | 11.5 |
| P22087 | rRNA 2'-O-methyltransferase fibrillar                                         | 1.20 | 0.158 | 5.0E-03 | 4  | 14.6 |
| O43852 | Calumenin                                                                     | 1.20 | 0.088 | 2.3E-04 | 7  | 22.5 |
| P04080 | Cystatin-B                                                                    | 1.19 | 0.072 | 9.5E-06 | 4  | 52.0 |
| O15145 | Actin-related protein 2/3 complex subunit 3                                   | 1.19 | NA    | NA      | 2  | 9.6  |
| P02790 | Hemopexin                                                                     | 1.19 | 0.141 | 1.2E-01 | 3  | 8.9  |
| Q13011 | Delta(3,5)-Delta(2,4)-dienoyl-CoA isomerase, mitochondrial                    | 1.19 | 0.122 | 1.7E-01 | 4  | 10.4 |
| P09417 | Dihydropteridine reductase                                                    | 1.19 | NA    | NA      | 2  | 12.3 |
| P62750 | 60S ribosomal protein L23a                                                    | 1.18 | 0.149 | 5.5E-03 | 4  | 20.5 |
| P02675 | Fibrinogen beta chain                                                         | 1.18 | 0.102 | 9.8E-06 | 8  | 21.2 |
| Q9UHL4 | Dipeptidyl peptidase 2                                                        | 1.18 | 0.231 | 2.3E-03 | 4  | 11.4 |
| Q9NX24 | H/ACA ribonucleoprotein complex subunit 2                                     | 1.18 | NA    | NA      | 2  | 19.0 |
| Q13217 | DnaJ homolog subfamily C member 3                                             | 1.18 | NA    | NA      | 2  | 3.6  |
| P12270 | Nucleoprotein TPR                                                             | 1.18 | 0.171 | 4.0E-01 | 4  | 2.5  |
| Q12906 | Interleukin enhancer-binding factor 3                                         | 1.18 | 0.119 | 3.3E-03 | 6  | 8.2  |
| P36269 | Gamma-glutamyltransferase 5                                                   | 1.18 | 0.145 | 7.9E-03 | 4  | 7.3  |
| P54136 | Arginine--tRNA ligase, cytoplasmic                                            | 1.17 | NA    | NA      | 2  | 3.3  |
| Q9Y376 | Calcium-binding protein 39                                                    | 1.17 | NA    | NA      | 2  | 5.9  |
| Q8NBJ5 | Procollagen galactosyltransferase 1                                           | 1.16 | NA    | NA      | 2  | 4.0  |
| P49411 | Elongation factor Tu, mitochondrial                                           | 1.16 | 0.089 | 1.8E-02 | 8  | 19.5 |
| Q9UBX5 | Fibulin-5                                                                     | 1.16 | 0.179 | 1.3E-03 | 3  | 7.1  |
| Q16181 | Septin-7                                                                      | 1.16 | 0.070 | 2.9E-04 | 6  | 16.2 |
| P27708 | CAD protein                                                                   | 1.16 | NA    | NA      | 2  | 0.9  |
| P22314 | Ubiquitin-like modifier-activating enzyme 1                                   | 1.16 | 0.138 | 4.9E-03 | 7  | 7.3  |
| P48643 | T-complex protein 1 subunit epsilon                                           | 1.16 | 0.136 | 8.7E-02 | 8  | 13.9 |
| P13674 | Prolyl 4-hydroxylase subunit alpha-1                                          | 1.16 | NA    | NA      | 2  | 4.7  |
| Q13425 | Beta-2-syntrophin                                                             | 1.15 | 0.066 | 6.9E-03 | 3  | 5.9  |
| O95881 | Thioredoxin domain-containing protein 12                                      | 1.15 | NA    | NA      | 2  | 14.0 |
| Q9UJZ1 | Stomatin-like protein 2, mitochondrial                                        | 1.15 | NA    | NA      | 2  | 8.7  |
| Q9UKM9 | RNA-binding protein Raly                                                      | 1.14 | 0.050 | 3.5E-03 | 4  | 17.0 |
| P07305 | Histone H1.0                                                                  | 1.14 | NA    | NA      | 2  | 8.8  |
| O00154 | Cytosolic acyl coenzyme A thioester hydrolase                                 | 1.14 | NA    | NA      | 2  | 8.2  |
| O75489 | NADH dehydrogenase [ubiquinone] iron-sulfur protein 3, mitochondrial          | 1.14 | 0.328 | 6.2E-01 | 4  | 18.9 |
| P20042 | Eukaryotic translation initiation factor 2 subunit 2                          | 1.14 | NA    | NA      | 2  | 9.9  |
| P42704 | Leucine-rich PPR motif-containing protein, mitochondrial                      | 1.13 | 0.116 | 2.4E-02 | 3  | 2.2  |
| Q15293 | Reticulocalbin-1                                                              | 1.13 | 0.184 | 2.0E-01 | 6  | 14.2 |
| Q6NUK1 | Calcium-binding mitochondrial carrier protein SCaMC-1                         | 1.12 | 0.219 | 1.9E-01 | 3  | 5.0  |
| P17987 | T-complex protein 1 subunit alpha                                             | 1.12 | 0.177 | 2.6E-01 | 8  | 15.5 |
| Q9Y6C2 | EMILIN-1                                                                      | 1.12 | 0.241 | 7.8E-04 | 5  | 6.1  |
| P15121 | Aldose reductase                                                              | 1.12 | 0.266 | 3.8E-02 | 5  | 16.1 |
| O75368 | SH3 domain-binding glutamic acid-rich-like protein                            | 1.12 | NA    | NA      | 2  | 21.9 |
| P54709 | Sodium/potassium-transporting ATPase subunit beta-3                           | 1.12 | 0.105 | 5.7E-02 | 3  | 13.6 |

|        |                                                                                                                 |      |       |         |    |      |
|--------|-----------------------------------------------------------------------------------------------------------------|------|-------|---------|----|------|
| P11766 | Alcohol dehydrogenase class-3                                                                                   | 1.12 | 0.597 | 2.2E-01 | 3  | 7.2  |
| P36957 | Dihydrolipoylysine-residue succinyltransferase component of 2-oxoglutarate dehydrogenase complex, mitochondrial | 1.12 | 0.169 | 7.7E-01 | 5  | 11.5 |
| Q07960 | Rho GTPase-activating protein 1                                                                                 | 1.12 | 0.172 | 6.5E-03 | 5  | 10.7 |
| Q9BTV4 | Transmembrane protein 43                                                                                        | 1.11 | NA    | NA      | 2  | 6.3  |
| P63241 | Eukaryotic translation initiation factor 5A-1                                                                   | 1.11 | 0.117 | 3.9E-04 | 6  | 33.1 |
| P01031 | Complement C5                                                                                                   | 1.11 | 0.280 | 6.5E-02 | 6  | 3.6  |
| Q02252 | Methylmalonate-semialdehyde dehydrogenase [acylating], mitochondrial                                            | 1.11 | 0.164 | 3.7E-01 | 3  | 5.8  |
| P00488 | Coagulation factor XIII A chain                                                                                 | 1.10 | NA    | NA      | 2  | 2.6  |
| P07919 | Cytochrome b-c1 complex subunit 6, mitochondrial                                                                | 1.10 | NA    | NA      | 2  | 15.4 |
| P31939 | Bifunctional purine biosynthesis protein PURH                                                                   | 1.10 | 0.200 | 8.9E-03 | 3  | 5.2  |
| P49748 | Very long-chain specific acyl-CoA dehydrogenase, mitochondrial                                                  | 1.09 | 3.977 | 5.0E-01 | 6  | 9.3  |
| P07954 | Fumarate hydratase, mitochondrial                                                                               | 1.09 | NA    | NA      | 2  | 3.7  |
| P30533 | Alpha-2-macroglobulin receptor-associated protein                                                               | 1.09 | 0.132 | 2.6E-02 | 4  | 10.1 |
| P51159 | Ras-related protein Rab-27A                                                                                     | 1.09 | NA    | NA      | 2  | 10.9 |
| Q9Y4W6 | AFG3-like protein 2                                                                                             | 1.08 | 0.106 | 1.8E-02 | 4  | 5.0  |
| P19823 | Inter-alpha-trypsin inhibitor heavy chain H2                                                                    | 1.08 | 0.175 | 4.5E-02 | 3  | 3.4  |
| Q92599 | Septin-8                                                                                                        | 1.08 | NA    | NA      | 2  | 6.0  |
| P58166 | Inhibin beta E chain                                                                                            | 1.08 | NA    | NA      | 2  | 6.6  |
| Q14247 | Src substrate cortactin                                                                                         | 1.08 | 0.319 | 4.8E-02 | 4  | 8.9  |
| P62906 | 60S ribosomal protein L10a                                                                                      | 1.08 | 0.073 | 7.0E-04 | 7  | 33.6 |
| P52565 | Rho GDP-dissociation inhibitor 1                                                                                | 1.07 | 0.140 | 1.6E-07 | 4  | 22.5 |
| P06703 | Protein S100-A6                                                                                                 | 1.07 | NA    | NA      | 2  | 16.7 |
| P62714 | Serine/threonine-protein phosphatase 2A catalytic subunit beta isoform                                          | 1.07 | NA    | NA      | 2  | 6.1  |
| P05107 | Integrin beta-2                                                                                                 | 1.06 | 0.121 | 8.1E-02 | 3  | 4.0  |
| P06454 | Prothymosin alpha                                                                                               | 1.06 | 0.365 | 2.8E-03 | 3  | 21.6 |
| P49755 | Transmembrane emp24 domain-containing protein 10                                                                | 1.06 | NA    | NA      | 2  | 9.6  |
| P61978 | Heterogeneous nuclear ribonucleoprotein K                                                                       | 1.06 | 0.079 | 8.3E-04 | 13 | 29.6 |
| Q8IV08 | Phospholipase D3                                                                                                | 1.06 | 0.076 | 2.0E-05 | 4  | 8.4  |
| P13010 | X-ray repair cross-complementing protein 5                                                                      | 1.06 | 0.271 | 5.1E-01 | 4  | 7.8  |
| P60660 | Myosin light polypeptide 6                                                                                      | 1.06 | 0.056 | 7.9E-11 | 8  | 58.3 |
| P36871 | Phosphoglucomutase-1                                                                                            | 1.05 | 0.253 | 1.5E-01 | 3  | 4.8  |
| P26583 | High mobility group protein B2                                                                                  | 1.05 | NA    | NA      | 2  | 12.9 |
| Q15046 | Lysine-tRNA ligase                                                                                              | 1.05 | 2.738 | 7.9E-01 | 3  | 5.5  |
| P39059 | Collagen alpha-1(XV) chain                                                                                      | 1.05 | 0.100 | 3.1E-06 | 5  | 3.5  |
| Q9Y323 | Deoxynucleoside triphosphate triphosphohydrolase SAMHD1                                                         | 1.04 | 0.053 | 9.5E-03 | 3  | 5.0  |
| Q9BS26 | Endoplasmic reticulum resident protein 44                                                                       | 1.04 | 0.062 | 1.7E-03 | 4  | 10.1 |
| P20810 | Calpastatin                                                                                                     | 1.04 | 0.387 | 2.4E-01 | 3  | 8.2  |
| P09543 | 2',3'-cyclic-nucleotide 3'-phosphodiesterase                                                                    | 1.04 | 0.136 | 1.2E-02 | 6  | 11.9 |
| P09669 | Cytochrome c oxidase subunit 6C                                                                                 | 1.04 | 0.243 | 4.7E-01 | 3  | 32.0 |
| P00738 | Haptoglobin                                                                                                     | 1.03 | 0.085 | 5.0E-04 | 5  | 12.3 |
| P12111 | Collagen alpha-3(VI) chain                                                                                      | 1.03 | 0.042 | 1.8E-11 | 36 | 11.7 |
| Q15233 | Non-POU domain-containing octamer-binding protein                                                               | 1.03 | NA    | NA      | 2  | 4.9  |
| Q13557 | Calcium/calmodulin-dependent protein kinase type II subunit delta                                               | 1.03 | NA    | NA      | 2  | 4.6  |
| P62829 | 60S ribosomal protein L23                                                                                       | 1.03 | NA    | NA      | 2  | 12.9 |
| P62277 | 40S ribosomal protein S13                                                                                       | 1.03 | 0.262 | 7.5E-02 | 6  | 34.4 |
| Q99714 | 3-hydroxyacyl-CoA dehydrogenase type-2                                                                          | 1.02 | NA    | NA      | 2  | 8.4  |
| P02511 | Alpha-crystallin B chain                                                                                        | 1.02 | 0.108 | 5.0E-05 | 5  | 29.1 |
| Q15691 | Microtubule-associated protein RP/EB family member 1                                                            | 1.02 | 0.614 | 6.4E-01 | 3  | 7.8  |
| O00159 | Unconventional myosin-1c                                                                                        | 1.02 | 0.087 | 1.2E-02 | 6  | 5.4  |
| P60174 | Triosephosphate isomerase                                                                                       | 1.02 | 0.107 | 2.5E-04 | 12 | 51.4 |
| Q06787 | Fragile X mental retardation protein 1                                                                          | 1.02 | NA    | NA      | 2  | 2.7  |
| O75964 | ATP synthase subunit g, mitochondrial                                                                           | 1.01 | NA    | NA      | 2  | 27.2 |
| P30084 | Enoyl-CoA hydratase, mitochondrial                                                                              | 1.01 | NA    | NA      | 2  | 8.6  |
| Q14699 | Raffin                                                                                                          | 1.01 | 0.325 | 2.6E-02 | 3  | 7.3  |
| Q9H4M9 | EH domain-containing protein 1                                                                                  | 1.00 | NA    | NA      | 2  | 3.6  |
| P08758 | Annexin A5                                                                                                      | 1.00 | 0.048 | 0.0E+00 | 19 | 59.7 |
| O60763 | General vesicular transport factor p115                                                                         | 1.00 | 0.200 | 3.1E-01 | 3  | 2.6  |
| Q5JTV8 | Torsin-1A-interacting protein 1                                                                                 | 1.00 | NA    | NA      | 2  | 4.3  |
| P19367 | Hexokinase-1                                                                                                    | 1.00 | 0.186 | 6.0E-02 | 5  | 5.5  |
| Q08722 | Leukocyte surface antigen CD47                                                                                  | 1.00 | NA    | NA      | 2  | 5.9  |
| P05164 | Myeloperoxidase                                                                                                 | 0.99 | NA    | NA      | 2  | 3.0  |
| P24534 | Elongation factor 1-beta                                                                                        | 0.99 | 0.106 | 3.0E-03 | 4  | 12.9 |
| P61106 | Ras-related protein Rab-14                                                                                      | 0.99 | 0.143 | 5.8E-01 | 3  | 23.7 |
| P49257 | Protein ERGIC-53                                                                                                | 0.99 | 0.106 | 9.0E-02 | 3  | 7.8  |
| Q02978 | Mitochondrial 2-oxoglutarate/malate carrier protein                                                             | 0.99 | NA    | NA      | 2  | 6.7  |
| Q9NTJ5 | Phosphatidylinositol phosphatase SAC1                                                                           | 0.99 | NA    | NA      | 2  | 4.1  |
| Q8IZP0 | Abi interactor 1                                                                                                | 0.98 | NA    | NA      | 2  | 4.9  |
| P09012 | U1 small nuclear ribonucleoprotein A                                                                            | 0.98 | NA    | NA      | 2  | 7.4  |
| Q9NYF8 | Bcl-2-associated transcription factor 1                                                                         | 0.98 | NA    | NA      | 2  | 4.2  |
| Q71UM5 | 40S ribosomal protein S27-like                                                                                  | 0.98 | NA    | NA      | 2  | 22.6 |
| P55268 | Laminin subunit beta-2                                                                                          | 0.98 | 0.077 | 4.8E-10 | 13 | 8.2  |
| P50213 | Isocitrate dehydrogenase [NAD] subunit alpha, mitochondrial                                                     | 0.98 | 0.111 | 1.1E-01 | 3  | 10.1 |
| P20674 | Cytochrome c oxidase subunit 5A, mitochondrial                                                                  | 0.98 | 0.050 | 1.0E-01 | 3  | 14.7 |
| O75436 | Vacuolar protein sorting-associated protein 26A                                                                 | 0.97 | NA    | NA      | 2  | 5.5  |
| P29692 | Elongation factor 1-delta                                                                                       | 0.97 | NA    | NA      | 2  | 6.4  |
| P23284 | Peptidyl-prolyl cis-trans isomerase B                                                                           | 0.97 | 0.070 | 8.6E-08 | 10 | 38.9 |
| P46939 | Utrrophin                                                                                                       | 0.97 | 0.101 | 4.5E-02 | 5  | 1.8  |
| P54920 | Alpha-soluble NSF attachment protein                                                                            | 0.97 | 0.170 | 1.8E-01 | 3  | 10.8 |
| O75306 | NADH dehydrogenase [ubiquinone] iron-sulfur protein 2, mitochondrial                                            | 0.96 | 0.285 | 4.8E-01 | 3  | 6.7  |
| P36543 | V-type proton ATPase subunit E 1                                                                                | 0.96 | 0.133 | 1.8E-02 | 3  | 10.6 |
| Q15843 | NEDD8                                                                                                           | 0.96 | NA    | NA      | 2  | 17.3 |
| O60749 | Sorting nexin-2                                                                                                 | 0.96 | NA    | NA      | 2  | 5.0  |
| Q13162 | Peroxiredoxin-4                                                                                                 | 0.96 | 0.203 | 3.0E-01 | 3  | 12.9 |
| P50395 | Rab GDP dissociation inhibitor beta                                                                             | 0.96 | 0.107 | 3.3E-06 | 6  | 16.6 |
| Q27J81 | Inverted formin-2                                                                                               | 0.96 | NA    | NA      | 2  | 1.6  |
| P29992 | Guanine nucleotide-binding protein subunit alpha-11                                                             | 0.95 | 0.285 | 2.0E-01 | 3  | 8.6  |
| P43121 | Cell surface glycoprotein MUC18                                                                                 | 0.95 | 0.246 | 3.9E-02 | 3  | 5.7  |
| P17858 | ATP-dependent 6-phosphofructokinase, liver type                                                                 | 0.95 | 0.356 | 5.6E-01 | 4  | 5.3  |
| P23246 | Splicing factor, proline- and glutamine-rich                                                                    | 0.94 | 0.209 | 3.7E-02 | 4  | 6.2  |
| P13804 | Electron transfer flavoprotein subunit alpha, mitochondrial                                                     | 0.94 | NA    | NA      | 2  | 6.0  |
| O95202 | LETM1 and EF-hand domain-containing protein 1, mitochondrial                                                    | 0.94 | 0.106 | 5.2E-01 | 3  | 4.3  |
| P04114 | Apolipoprotein B-100                                                                                            | 0.93 | NA    | NA      | 2  | 0.4  |
| O14773 | Tripeptidyl-peptidase 1                                                                                         | 0.93 | 0.057 | 3.0E-04 | 3  | 6.2  |
| P55209 | Nucleosome assembly protein 1-like 1                                                                            | 0.93 | NA    | NA      | 2  | 7.7  |
| P40939 | Trifunctional enzyme subunit alpha, mitochondrial                                                               | 0.93 | 0.114 | 2.1E-01 | 5  | 6.6  |
| Q13243 | Serine/arginine-rich splicing factor 5                                                                          | 0.92 | NA    | NA      | 2  | 5.9  |
| Q92688 | Acidic leucine-rich nuclear phosphoprotein 32 family member B                                                   | 0.92 | 0.169 | 8.6E-03 | 5  | 17.1 |
| P04632 | Calpain small subunit 1                                                                                         | 0.92 | 0.516 | 9.2E-01 | 3  | 11.2 |
| Q9UHD8 | Septin-9                                                                                                        | 0.92 | 0.374 | 7.0E-01 | 3  | 5.6  |
| P07858 | Cathepsin B                                                                                                     | 0.92 | 0.186 | 5.0E-04 | 4  | 13.0 |
| P21796 | Voltage-dependent anion-selective channel protein 1                                                             | 0.92 | 0.071 | 3.3E-06 | 6  | 19.8 |
| P13639 | Elongation factor 2                                                                                             | 0.91 | 0.161 | 9.3E-05 | 12 | 12.8 |
| Q8IVF2 | Protein AHNAK2                                                                                                  | 0.91 | 0.117 | 1.0E-05 | 8  | 0.5  |
| P15088 | Mast cell carboxypeptidase A                                                                                    | 0.91 | 0.223 | 7.6E-04 | 5  | 10.1 |
| Q14108 | Lysosome membrane protein 2                                                                                     | 0.90 | NA    | NA      | 2  | 4.6  |
| P10599 | Thioredoxin                                                                                                     | 0.90 | 0.126 | 1.6E-04 | 3  | 32.4 |
| P01834 | Ig kappa chain C region                                                                                         | 0.90 | NA    | NA      | 2  | 34.9 |
| P61586 | Transforming protein RhoA                                                                                       | 0.89 | NA    | NA      | 2  | 9.8  |
| Q8NC56 | LEM domain-containing protein 2                                                                                 | 0.89 | NA    | NA      | 2  | 3.6  |

|        |                                                                                   |      |       |         |    |      |
|--------|-----------------------------------------------------------------------------------|------|-------|---------|----|------|
| Q01085 | Nucleolysin TIAR                                                                  | 0.89 | NA    | NA      | 2  | 4.8  |
| P31153 | S-adenosylmethionine synthase isoform type-2                                      | 0.89 | 0.841 | 7.6E-01 | 3  | 9.4  |
| P27816 | Microtubule-associated protein 4                                                  | 0.89 | 0.292 | 6.6E-01 | 5  | 4.9  |
| P02671 | Fibrinogen alpha chain                                                            | 0.88 | 0.093 | 3.2E-03 | 8  | 11.3 |
| Q03252 | Lamin-B2                                                                          | 0.88 | 0.057 | 4.8E-09 | 14 | 24.3 |
| P54727 | UV excision repair protein RAD23 homolog B                                        | 0.88 | 0.302 | 4.2E-01 | 5  | 10.0 |
| P05091 | Aldehyde dehydrogenase, mitochondrial                                             | 0.88 | 0.255 | 2.3E-01 | 3  | 6.0  |
| Q9NZN4 | EH domain-containing protein 2                                                    | 0.88 | NA    | NA      | 2  | 3.5  |
| P30042 | ES1 protein homolog, mitochondrial                                                | 0.88 | 0.040 | 3.6E-03 | 3  | 13.1 |
| Q9Y6N5 | Sulfide:quinone oxidoreductase, mitochondrial                                     | 0.88 | 0.116 | 4.1E-02 | 5  | 14.2 |
| P42224 | Signal transducer and activator of transcription 1-alpha/beta                     | 0.88 | NA    | NA      | 2  | 2.8  |
| P08571 | Monocyte differentiation antigen CD14                                             | 0.88 | NA    | NA      | 2  | 5.3  |
| P30043 | Flavin reductase (NADPH)                                                          | 0.87 | NA    | NA      | 2  | 16.0 |
| O00410 | Importin-5                                                                        | 0.87 | NA    | NA      | 2  | 1.3  |
| Q9UBS4 | DnaJ homolog subfamily B member 11                                                | 0.87 | NA    | NA      | 2  | 5.9  |
| P35625 | Metalloproteinase inhibitor 3                                                     | 0.87 | 0.091 | 1.3E-08 | 4  | 15.6 |
| P05186 | Alkaline phosphatase, tissue-nonspecific isozyme                                  | 0.87 | 0.219 | 1.5E-02 | 4  | 7.1  |
| P09493 | Tropomyosin alpha-1 chain                                                         | 0.87 | 0.337 | 4.3E-02 | 5  | 12.0 |
| P21589 | 5'-nucleotidase                                                                   | 0.87 | 0.159 | 3.4E-01 | 6  | 12.0 |
| P51572 | B-cell receptor-associated protein 31                                             | 0.86 | 0.111 | 4.9E-02 | 8  | 28.9 |
| P26447 | Protein S100-A4                                                                   | 0.86 | 0.132 | 5.1E-05 | 3  | 27.7 |
| P68371 | Tubulin beta-4B chain                                                             | 0.86 | 0.065 | 2.9E-05 | 3  | 10.6 |
| O00231 | 26S proteasome non-ATPase regulatory subunit 11                                   | 0.86 | 0.104 | 2.8E-01 | 4  | 8.5  |
| P62136 | Serine/threonine-protein phosphatase PP1-alpha catalytic subunit                  | 0.86 | NA    | NA      | 2  | 6.1  |
| Q96KP4 | Cytosolic non-specific dipeptidase                                                | 0.85 | 0.082 | 4.2E-04 | 5  | 13.9 |
| P14927 | Cytochrome b-c1 complex subunit 7                                                 | 0.85 | 1.891 | 8.4E-01 | 3  | 19.8 |
| Q9Y310 | tRNA-splicing ligase RtcB homolog                                                 | 0.84 | NA    | NA      | 2  | 4.6  |
| P55795 | Heterogeneous nuclear ribonucleoprotein H2                                        | 0.84 | 0.678 | 9.8E-01 | 5  | 10.2 |
| Q9BUF5 | Tubulin beta-6 chain                                                              | 0.84 | 0.113 | 2.1E-05 | 4  | 9.0  |
| P02649 | Apolipoprotein E                                                                  | 0.83 | 0.118 | 1.1E-05 | 16 | 49.5 |
| P50991 | T-complex protein 1 subunit delta                                                 | 0.83 | 0.167 | 3.3E-01 | 5  | 12.4 |
| Q9NQC3 | Reticulon-4                                                                       | 0.83 | NA    | NA      | 2  | 2.3  |
| P11166 | Solute carrier family 2, facilitated glucose transporter member 1                 | 0.83 | 0.132 | 5.6E-04 | 3  | 5.5  |
| Q9UIJ7 | GTP:AMP phosphotransferase AK3, mitochondrial                                     | 0.82 | 0.294 | 9.0E-01 | 3  | 15.0 |
| P22748 | Carbonic anhydrase 4                                                              | 0.82 | 0.257 | 4.1E-04 | 6  | 16.3 |
| P32119 | Peroxisredoxin-2                                                                  | 0.82 | NA    | NA      | 2  | 8.6  |
| Q14376 | UDP-glucose 4-epimerase                                                           | 0.82 | NA    | NA      | 2  | 6.9  |
| P52566 | Rho GDP-dissociation inhibitor 2                                                  | 0.81 | NA    | NA      | 2  | 15.4 |
| P17540 | Creatine kinase S-type, mitochondrial                                             | 0.81 | NA    | NA      | 2  | 5.5  |
| Q6NZI2 | Polymerase I and transcript release factor                                        | 0.81 | 0.102 | 3.5E-04 | 6  | 19.2 |
| P59998 | Actin-related protein 2/3 complex subunit 4                                       | 0.80 | 0.055 | 6.8E-03 | 3  | 16.1 |
| O15144 | Actin-related protein 2/3 complex subunit 2                                       | 0.80 | 0.295 | 3.5E-01 | 4  | 12.0 |
| Q93050 | V-type proton ATPase 116 kDa subunit a isoform 1                                  | 0.80 | NA    | NA      | 2  | 3.0  |
| Q04760 | Lactoylglutathione lyase                                                          | 0.80 | NA    | NA      | 2  | 9.8  |
| P30519 | Heme oxygenase 2                                                                  | 0.80 | NA    | NA      | 2  | 10.1 |
| O60313 | Dynamin-like 120 kDa protein, mitochondrial                                       | 0.80 | NA    | NA      | 2  | 2.6  |
| Q02952 | A-kinase anchor protein 12                                                        | 0.80 | 0.151 | 3.5E-04 | 9  | 5.9  |
| Q9NYL4 | Peptidyl-prolyl cis-trans isomerase FKBP11                                        | 0.80 | NA    | NA      | 2  | 10.4 |
| P38117 | Electron transfer flavoprotein subunit beta                                       | 0.80 | 0.006 | 5.7E-02 | 3  | 11.8 |
| Q96C86 | m7GpppX diphosphatase                                                             | 0.80 | NA    | NA      | 2  | 8.3  |
| Q9NZ08 | Endoplasmic reticulum aminopeptidase 1                                            | 0.79 | NA    | NA      | 2  | 2.2  |
| Q9H2U2 | Inorganic pyrophosphatase 2, mitochondrial                                        | 0.79 | 0.257 | 4.0E-01 | 3  | 9.0  |
| P51665 | 26S proteasome non-ATPase regulatory subunit 7                                    | 0.79 | NA    | NA      | 2  | 6.2  |
| P23528 | Cofilin-1                                                                         | 0.79 | 0.169 | 1.6E-03 | 7  | 42.2 |
| P25788 | Proteasome subunit alpha type-3                                                   | 0.79 | NA    | NA      | 2  | 4.7  |
| P55735 | Protein SEC13 homolog                                                             | 0.79 | NA    | NA      | 2  | 6.8  |
| P55786 | Puromycin-sensitive aminopeptidase                                                | 0.79 | 0.225 | 6.6E-02 | 3  | 3.5  |
| Q16658 | Fascin                                                                            | 0.78 | NA    | NA      | 2  | 6.1  |
| P31053 | Serine/threonine-protein phosphatase 2A 65 kDa regulatory subunit A alpha isoform | 0.78 | 0.048 | 1.5E-01 | 3  | 5.4  |
| O00264 | Membrane-associated progesterone receptor component 1                             | 0.78 | 0.070 | 4.4E-02 | 3  | 15.9 |
| P01023 | Alpha-2-macroglobulin                                                             | 0.78 | 0.074 | 1.1E-03 | 10 | 7.6  |
| Q15029 | 116 kDa U5 small nuclear ribonucleoprotein component                              | 0.78 | 0.168 | 1.7E-01 | 3  | 3.7  |
| Q94979 | Protein transport protein Sec31A                                                  | 0.77 | 0.150 | 2.7E-01 | 5  | 4.9  |
| Q13642 | Four and a half LIM domains protein 1                                             | 0.77 | NA    | NA      | 2  | 8.0  |
| Q8WWM9 | Cytoglobin                                                                        | 0.77 | NA    | NA      | 2  | 8.4  |
| P48444 | Coatomer subunit delta                                                            | 0.77 | NA    | NA      | 2  | 4.1  |
| P30041 | Peroxisredoxin-6                                                                  | 0.77 | 0.059 | 5.7E-06 | 8  | 28.6 |
| Q92499 | ATP-dependent RNA helicase DDX1                                                   | 0.77 | NA    | NA      | 2  | 2.6  |
| P08559 | Pyruvate dehydrogenase E1 component subunit alpha, somatic form, mitochondrial    | 0.77 | NA    | NA      | 2  | 5.4  |
| P14209 | CD99 antigen                                                                      | 0.77 | NA    | NA      | 2  | 9.7  |
| Q14103 | Heterogeneous nuclear ribonucleoprotein D0                                        | 0.76 | NA    | NA      | 2  | 6.8  |
| O14495 | Lipid phosphate phosphohydrolase 3                                                | 0.76 | NA    | NA      | 2  | 7.1  |
| P02679 | Fibrinogen gamma chain                                                            | 0.75 | 0.093 | 7.9E-05 | 10 | 25.2 |
| P21926 | CD9 antigen                                                                       | 0.75 | NA    | NA      | 2  | 7.5  |
| P15586 | N-acetylglucosamine-6-sulfatase                                                   | 0.75 | 0.196 | 4.0E-03 | 3  | 4.7  |
| Q92820 | Gamma-glutamyl hydrolase                                                          | 0.74 | NA    | NA      | 2  | 7.9  |
| P42167 | Lamina-associated polypeptide 2, isoforms beta/gamma                              | 0.74 | NA    | NA      | 2  | 5.5  |
| P35222 | Catenin beta-1                                                                    | 0.74 | 0.109 | 1.2E-02 | 6  | 8.6  |
| P63220 | 40S ribosomal protein S21                                                         | 0.74 | NA    | NA      | 2  | 22.9 |
| P12955 | Xaa-Pro dipeptidase                                                               | 0.73 | 0.102 | 2.6E-04 | 4  | 7.3  |
| P08133 | Annexin A6                                                                        | 0.73 | 0.040 | 0.0E+00 | 28 | 43.2 |
| P09525 | Annexin A4                                                                        | 0.73 | 0.149 | 1.9E-03 | 8  | 22.9 |
| Q14764 | Major vault protein                                                               | 0.73 | 0.128 | 3.4E-02 | 3  | 3.7  |
| O15173 | Membrane-associated progesterone receptor component 2                             | 0.72 | 0.166 | 2.2E-02 | 3  | 17.9 |
| P01008 | Antithrombin-III                                                                  | 0.72 | 0.251 | 3.1E-03 | 3  | 6.9  |
| Q43242 | 26S proteasome non-ATPase regulatory subunit 3                                    | 0.71 | NA    | NA      | 2  | 3.2  |
| Q9Y6M9 | NADH dehydrogenase [ubiquinone] 1 beta subcomplex subunit 9                       | 0.71 | NA    | NA      | 2  | 15.6 |
| Q94874 | E3 UFM1-protein ligase 1                                                          | 0.71 | NA    | NA      | 2  | 2.6  |
| Q9BR76 | Coronin-1B                                                                        | 0.71 | NA    | NA      | 2  | 3.9  |
| P63244 | Guanine nucleotide-binding protein subunit beta-2-like 1                          | 0.71 | 0.363 | 9.7E-01 | 3  | 9.5  |
| P04216 | Thy-1 membrane glycoprotein                                                       | 0.71 | NA    | NA      | 2  | 15.5 |
| P46776 | 60S ribosomal protein L27a                                                        | 0.71 | NA    | NA      | 2  | 14.2 |
| P14550 | Alcohol dehydrogenase [NADP(+)]                                                   | 0.71 | 0.243 | 1.9E-01 | 4  | 11.4 |
| Q94826 | Mitochondrial import receptor subunit TOM70                                       | 0.70 | NA    | NA      | 2  | 2.6  |
| P10606 | Cytochrome c oxidase subunit 5B, mitochondrial                                    | 0.70 | 0.131 | 4.8E-02 | 6  | 31.0 |
| Q9UBR2 | Cathepsin Z                                                                       | 0.69 | NA    | NA      | 2  | 7.3  |
| P35749 | Myosin-11                                                                         | 0.69 | 0.137 | 1.6E-09 | 22 | 11.7 |
| O75083 | WD repeat-containing protein 1                                                    | 0.68 | 0.136 | 8.3E-05 | 6  | 9.7  |
| P31146 | Coronin-1A                                                                        | 0.68 | 0.218 | 1.3E-01 | 3  | 8.0  |
| P30622 | CAP-Gly domain-containing linker protein 1                                        | 0.68 | 0.722 | 7.9E-01 | 3  | 2.7  |
| Q9NP81 | Serine-tRNA ligase, mitochondrial                                                 | 0.68 | NA    | NA      | 2  | 6.9  |
| P40121 | Macrophage-capping protein                                                        | 0.68 | NA    | NA      | 2  | 5.7  |
| Q94905 | Erlin-2                                                                           | 0.68 | NA    | NA      | 2  | 5.0  |
| Q95336 | 6-phosphogluconolactonase                                                         | 0.67 | 0.206 | 3.0E-02 | 3  | 15.1 |
| P07197 | Neurofilament medium polypeptide                                                  | 0.67 | 0.165 | 9.0E-03 | 6  | 6.9  |
| Q92973 | Transportin-1                                                                     | 0.66 | 0.444 | 2.5E-01 | 3  | 4.6  |
| Q13510 | Acid ceramidase                                                                   | 0.66 | 0.085 | 2.3E-11 | 6  | 12.4 |
| Q13228 | Selenium-binding protein 1                                                        | 0.66 | NA    | NA      | 2  | 4.2  |
| P53621 | Coatomer subunit alpha                                                            | 0.66 | 1.141 | 8.4E-01 | 6  | 5.1  |

|        |                                                                             |      |       |         |    |      |
|--------|-----------------------------------------------------------------------------|------|-------|---------|----|------|
| Q9NTZ6 | RNA-binding protein 12                                                      | 0.65 | NA    | NA      | 2  | 3.3  |
| Q43390 | Heterogeneous nuclear ribonucleoprotein R                                   | 0.65 | 0.740 | 5.0E-01 | 4  | 6.5  |
| Q9P0K7 | Ankyrin                                                                     | 0.65 | NA    | NA      | 2  | 1.8  |
| P35579 | Myosin-9                                                                    | 0.65 | 0.042 | 4.7E-14 | 51 | 25.8 |
| Q9Y3U8 | 60S ribosomal protein L36                                                   | 0.64 | 0.084 | 2.5E-02 | 4  | 30.5 |
| P00367 | Glutamate dehydrogenase 1, mitochondrial                                    | 0.64 | 0.117 | 2.2E-02 | 6  | 10.8 |
| P18124 | 60S ribosomal protein L7                                                    | 0.64 | 0.117 | 2.5E-01 | 5  | 17.3 |
| P06737 | Glycogen phosphorylase, liver form                                          | 0.64 | 0.099 | 5.0E-05 | 20 | 23.7 |
| P50995 | Annexin A11                                                                 | 0.64 | 0.082 | 8.1E-04 | 6  | 11.1 |
| P01876 | Ig alpha-1 chain C region                                                   | 0.64 | NA    | NA      | 2  | 4.5  |
| Q02218 | 2-oxoglutarate dehydrogenase, mitochondrial                                 | 0.63 | 0.093 | 1.3E-01 | 6  | 6.7  |
| P0C0S5 | Histone H2A.Z                                                               | 0.63 | NA    | NA      | 2  | 18.8 |
| Q16795 | NADH dehydrogenase [ubiquinone] 1 alpha subcomplex subunit 9, mitochondrial | 0.63 | NA    | NA      | 2  | 6.4  |
| P61088 | Ubiquitin-conjugating enzyme E2 N                                           | 0.62 | NA    | NA      | 2  | 13.8 |
| P55084 | Trifunctional enzyme subunit beta, mitochondrial                            | 0.62 | 0.077 | 1.0E-02 | 8  | 12.9 |
| Q13838 | Spliceosome RNA helicase DDX39B                                             | 0.62 | NA    | NA      | 2  | 5.1  |
| P62280 | 40S ribosomal protein S11                                                   | 0.61 | 0.152 | 1.4E-01 | 3  | 14.6 |
| Q9NVA2 | Septin-11                                                                   | 0.60 | NA    | NA      | 2  | 4.9  |
| P02760 | Protein AMBP                                                                | 0.60 | NA    | NA      | 2  | 7.7  |
| Q04917 | 14-3-3 protein eta                                                          | 0.60 | NA    | NA      | 2  | 9.8  |
| P78347 | General transcription factor II-I                                           | 0.59 | 0.349 | 2.1E-01 | 3  | 2.9  |
| P02751 | Fibronectin                                                                 | 0.59 | 0.094 | 3.4E-07 | 8  | 4.4  |
| P02545 | Prelamin-A/C                                                                | 0.59 | 0.644 | 5.4E-01 | 34 | 41.1 |
| P29401 | Transketolase                                                               | 0.58 | 0.131 | 7.2E-05 | 9  | 12.2 |
| Q6P2Q9 | Pre-mRNA-processing-splicing factor 8                                       | 0.58 | 0.648 | 7.9E-01 | 3  | 1.4  |
| Q96AE4 | Far upstream element-binding protein 1                                      | 0.58 | 0.257 | 4.6E-01 | 3  | 4.5  |
| P28331 | NADH-ubiquinone oxidoreductase 75 kDa subunit, mitochondrial                | 0.58 | 0.766 | 8.5E-01 | 3  | 4.5  |
| Q5SSJ5 | Heterochromatin protein 1-binding protein 3                                 | 0.57 | NA    | NA      | 2  | 3.4  |
| P00505 | Aspartate aminotransferase, mitochondrial                                   | 0.57 | 0.086 | 6.2E-03 | 6  | 16.7 |
| Q92522 | Histone H1x                                                                 | 0.57 | NA    | NA      | 2  | 11.7 |
| Q14683 | Structural maintenance of chromosomes protein 1A                            | 0.56 | 0.077 | 6.5E-02 | 3  | 2.8  |
| Q5VTE0 | Putative elongation factor 1-alpha-like 3                                   | 0.56 | 0.074 | 9.4E-05 | 11 | 26.6 |
| P08670 | Vimentin                                                                    | 0.56 | 0.039 | 0.0E+00 | 28 | 59.4 |
| P40926 | Malate dehydrogenase, mitochondrial                                         | 0.56 | 0.107 | 2.0E-07 | 8  | 28.7 |
| P05023 | Sodium/potassium-transporting ATPase subunit alpha-1                        | 0.55 | 0.096 | 6.4E-06 | 15 | 16.2 |
| Q9NSD9 | Phenylalanine--tRNA ligase beta subunit                                     | 0.55 | 0.464 | 5.8E-01 | 3  | 4.9  |
| Q53EL6 | Programmed cell death protein 4                                             | 0.53 | NA    | NA      | 2  | 4.7  |
| P20618 | Proteasome subunit beta type-1                                              | 0.53 | 0.174 | 5.2E-03 | 3  | 15.4 |
| P02787 | Serotransferrin                                                             | 0.53 | 0.099 | 9.2E-05 | 14 | 21.3 |
| P02768 | Serum albumin                                                               | 0.52 | 0.034 | 0.0E+00 | 37 | 54.0 |
| P05387 | 60S acidic ribosomal protein P2                                             | 0.52 | 0.087 | 1.9E-03 | 5  | 32.2 |
| P15880 | 40S ribosomal protein S2                                                    | 0.52 | NA    | NA      | 2  | 7.8  |
| P06753 | Tropomyosin alpha-3 chain                                                   | 0.52 | 0.102 | 1.3E-04 | 4  | 13.0 |
| P57053 | Histone H2B type F-S                                                        | 0.51 | NA    | NA      | 2  | 7.9  |
| Q8WU04 | Programmed cell death 6-interacting protein                                 | 0.50 | 0.246 | 1.2E-01 | 4  | 4.5  |
| Q5JRX3 | Presequence protease, mitochondrial                                         | 0.50 | NA    | NA      | 2  | 2.4  |
| P14136 | Glial fibrillary acidic protein                                             | 0.50 | NA    | NA      | 2  | 5.6  |
| O75947 | ATP synthase subunit d, mitochondrial                                       | 0.49 | 0.324 | 3.1E-01 | 5  | 22.4 |
| P07437 | Tubulin beta chain                                                          | 0.49 | 0.058 | 1.5E-06 | 3  | 9.9  |
| P23396 | 40S ribosomal protein S3                                                    | 0.49 | 0.099 | 5.0E-02 | 7  | 24.7 |
| O94919 | Endonuclease domain-containing 1 protein                                    | 0.48 | NA    | NA      | 2  | 5.8  |
| Q9H3G5 | Probable serine carboxypeptidase CPVL                                       | 0.47 | NA    | NA      | 2  | 3.2  |
| P17096 | High mobility group protein HMG-I/HMG-Y                                     | 0.47 | NA    | NA      | 2  | 23.4 |
| P40227 | T-complex protein 1 subunit zeta                                            | 0.47 | NA    | NA      | 2  | 4.1  |
| O15143 | Actin-related protein 2/3 complex subunit 1B                                | 0.47 | NA    | NA      | 2  | 6.5  |
| P48735 | Iso citrate dehydrogenase [NADP], mitochondrial                             | 0.46 | NA    | NA      | 2  | 4.2  |
| P46777 | 60S ribosomal protein L5                                                    | 0.46 | 0.846 | 3.0E-01 | 4  | 15.5 |
| P12814 | Alpha-actinin-1                                                             | 0.46 | 0.062 | 5.9E-07 | 8  | 12.3 |
| Q53H82 | Beta-lactamase-like protein 2                                               | 0.45 | 0.289 | 1.6E-01 | 3  | 12.5 |
| P08899 | Histone H2B type 1-J                                                        | 0.45 | NA    | NA      | 2  | 7.9  |
| P62701 | 40S ribosomal protein S4, X isoform                                         | 0.45 | 0.386 | 9.3E-01 | 3  | 9.1  |
| P60981 | Destrin                                                                     | 0.45 | NA    | NA      | 2  | 13.3 |
| P38646 | Stress-70 protein, mitochondrial                                            | 0.45 | 0.137 | 2.4E-02 | 8  | 13.5 |
| Q13561 | Dynactin subunit 2                                                          | 0.44 | 0.109 | 1.7E-01 | 5  | 10.7 |
| P49207 | 60S ribosomal protein L34                                                   | 0.43 | NA    | NA      | 2  | 12.8 |
| P23634 | Plasma membrane calcium-transporting ATPase 4                               | 0.43 | NA    | NA      | 2  | 2.0  |
| O43707 | Alpha-actinin-4                                                             | 0.43 | 0.080 | 3.4E-03 | 15 | 19.8 |
| A4D1P6 | WD repeat-containing protein 91                                             | 0.42 | NA    | NA      | 2  | 4.3  |
| Q15942 | Zyxin                                                                       | 0.41 | NA    | NA      | 2  | 5.2  |
| Q99873 | Protein arginine N-methyltransferase 1                                      | 0.41 | NA    | NA      | 2  | 7.5  |
| P11940 | Polyadenylate-binding protein 1                                             | 0.38 | 0.073 | 6.2E-02 | 4  | 7.4  |
| Q15631 | Translin                                                                    | 0.38 | NA    | NA      | 2  | 8.8  |
| P43307 | Translocon-associated protein subunit alpha                                 | 0.37 | NA    | NA      | 2  | 6.6  |
| P34932 | Heat shock 70 kDa protein 4                                                 | 0.36 | 0.309 | 3.7E-01 | 8  | 11.3 |
| P55060 | Exportin-2                                                                  | 0.35 | 0.205 | 1.0E-01 | 3  | 3.4  |
| O95865 | N(G),N(G)-dimethylarginine dimethylaminohydrolase 2                         | 0.35 | 0.204 | 3.1E-01 | 3  | 11.2 |
| Q08380 | Galectin-3-binding protein                                                  | 0.34 | NA    | NA      | 2  | 4.8  |
| P18859 | ATP synthase-coupling factor 6, mitochondrial                               | 0.33 | 0.965 | 7.2E-01 | 3  | 30.6 |
| Q14974 | Importin subunit beta-1                                                     | 0.33 | 0.216 | 9.7E-02 | 3  | 5.4  |
| P07384 | Calpain-1 catalytic subunit                                                 | 0.31 | 0.085 | 3.0E-01 | 5  | 7.7  |
| Q14203 | Dynactin subunit 1                                                          | 0.31 | 0.114 | 1.4E-01 | 3  | 3.3  |
| Q14558 | Phosphoribosyl pyrophosphate synthase-associated protein 1                  | 0.31 | NA    | NA      | 2  | 8.4  |
| P35637 | RNA-binding protein FUS                                                     | 0.30 | 0.521 | 1.0E+00 | 3  | 5.3  |
| O75477 | Erlin-1                                                                     | 0.29 | NA    | NA      | 2  | 7.2  |
| Q9LUL0 | Aspartyl aminopeptidase                                                     | 0.29 | NA    | NA      | 2  | 6.1  |
| Q15121 | Astrocytic phosphoprotein PEA-15                                            | 0.28 | NA    | NA      | 2  | 16.9 |
| P28196 | Probable ATP-dependent RNA helicase DDX6                                    | 0.28 | NA    | NA      | 2  | 6.8  |
| O14979 | Heterogeneous nuclear ribonucleoprotein D-like                              | 0.27 | 0.214 | 1.4E-01 | 3  | 4.5  |
| P47985 | Cytochrome b-c1 complex subunit Rieske, mitochondrial                       | 0.26 | NA    | NA      | 2  | 8.0  |
| P10809 | 60 kDa heat shock protein, mitochondrial                                    | 0.26 | 0.269 | 8.0E-02 | 12 | 20.9 |
| P17661 | Desmin                                                                      | 0.26 | NA    | NA      | 2  | 4.0  |
| Q6DD88 | Atlastin-3                                                                  | 0.26 | 0.129 | 5.9E-02 | 3  | 5.9  |
| P31949 | Protein S100-A11                                                            | 0.23 | NA    | NA      | 2  | 17.1 |
| Q99733 | Nucleosome assembly protein 1-like 4                                        | 0.23 | NA    | NA      | 2  | 7.7  |
| Q99623 | Prohibitin-2                                                                | 0.21 | 0.126 | 1.6E-01 | 8  | 28.1 |
| P14317 | Hematopoietic lineage cell-specific protein                                 | 0.21 | NA    | NA      | 2  | 4.3  |
| P17931 | Galectin-3                                                                  | 0.21 | 0.402 | 4.0E-01 | 5  | 25.6 |
| P32969 | 60S ribosomal protein L9                                                    | 0.20 | 0.403 | 9.4E-01 | 4  | 15.1 |
| P04440 | HLA class II histocompatibility antigen, DP beta 1 chain                    | 0.20 | NA    | NA      | 2  | 7.8  |
| O95302 | Peptidyl-prolyl cis-trans isomerase FKBP9                                   | 0.20 | NA    | NA      | 2  | 4.0  |
| P52815 | 39S ribosomal protein L12, mitochondrial                                    | 0.20 | NA    | NA      | 2  | 5.6  |
| Q9BQE3 | Tubulin alpha-1C chain                                                      | 0.18 | NA    | NA      | 2  | 6.7  |
| O43809 | Cleavage and polyadenylation specificity factor subunit 5                   | 0.18 | NA    | NA      | 2  | 13.2 |
| P35221 | Catenin alpha-1                                                             | 0.17 | 0.173 | 2.5E-01 | 6  | 7.4  |
| Q8NBS9 | Thioredoxin domain-containing protein 5                                     | 0.17 | 0.088 | 6.5E-02 | 7  | 15.5 |
| P17612 | cAMP-dependent protein kinase catalytic subunit alpha                       | 0.16 | NA    | NA      | 2  | 4.3  |
| Q00325 | Phosphate carrier protein, mitochondrial                                    | 0.16 | 0.307 | 5.7E-01 | 6  | 16.0 |
| P27824 | Calnexin                                                                    | 0.15 | 0.490 | 5.8E-01 | 8  | 15.4 |
| P60033 | CD81 antigen                                                                | 0.14 | NA    | NA      | 2  | 11.9 |

|        |                                                            |      |       |         |    |      |
|--------|------------------------------------------------------------|------|-------|---------|----|------|
| P16152 | Carbonyl reductase [NADPH] 1                               | 0.14 | NA    | NA      | 2  | 7.6  |
| P62249 | 40S ribosomal protein S16                                  | 0.14 | NA    | NA      | 2  | 15.8 |
| P62913 | 60S ribosomal protein L11                                  | 0.14 | 0.103 | 5.6E-02 | 3  | 16.9 |
| P28838 | Cytosol aminopeptidase                                     | 0.14 | 0.217 | 4.1E-01 | 7  | 17.0 |
| Q00796 | Sorbitol dehydrogenase                                     | 0.14 | NA    | NA      | 2  | 4.8  |
| A0FGR8 | Extended synaptotagmin-2                                   | 0.13 | NA    | NA      | 2  | 2.8  |
| P39023 | 60S ribosomal protein L3                                   | 0.12 | 0.332 | 6.3E-01 | 3  | 6.7  |
| Q16853 | Membrane primary amine oxidase                             | 0.12 | NA    | NA      | 2  | 2.4  |
| P62269 | 40S ribosomal protein S18                                  | 0.12 | 0.202 | 5.5E-01 | 6  | 38.8 |
| P30044 | Peroxisiredoxin-5, mitochondrial                           | 0.11 | 0.177 | 2.0E-01 | 3  | 16.8 |
| O00203 | AP-3 complex subunit beta-1                                | 0.11 | NA    | NA      | 2  | 2.7  |
| Q13151 | Heterogeneous nuclear ribonucleoprotein A0                 | 0.10 | 3.349 | 7.5E-01 | 3  | 7.5  |
| O14950 | Myosin regulatory light chain 12B                          | 0.10 | NA    | NA      | 2  | 12.2 |
| P17980 | 26S protease regulatory subunit 6A                         | 0.10 | NA    | NA      | 2  | 5.7  |
| Q07065 | Cytoskeleton-associated protein 4                          | 0.08 | 0.245 | 2.0E-01 | 6  | 12.5 |
| P14625 | Endoplasmic                                                | 0.07 | 0.134 | 7.7E-02 | 14 | 17.2 |
| P60842 | Eukaryotic initiation factor 4A-1                          | 0.04 | NA    | NA      | 2  | 6.4  |
| P07339 | Cathepsin D                                                | 0.41 | 0.117 | 1.3E-05 | 5  | 11.7 |
| P04083 | Annexin A1                                                 | 0.39 | 0.106 | 4.1E-09 | 11 | 30.6 |
| Q13813 | Spectrin alpha chain, non-erythrocytic 1                   | 0.39 | 0.026 | 0.0E+00 | 60 | 25.9 |
| P02730 | Band 3 anion transport protein                             | 0.37 | 0.144 | 1.2E-04 | 6  | 7.1  |
| Q09666 | Neuroblast differentiation-associated protein AHNAK        | 0.37 | 0.038 | 5.6E-11 | 74 | 11.8 |
| Q99572 | P2X purinoceptor 7                                         | 0.37 | 0.156 | 2.8E-02 | 5  | 10.6 |
| P21333 | Filamin-A                                                  | 0.37 | 0.047 | 6.7E-16 | 48 | 22.8 |
| O14818 | Proteasome subunit alpha type-7                            | 0.36 | 0.099 | 3.4E-04 | 3  | 11.3 |
| Q13435 | Splicing factor 3B subunit 2                               | 0.36 | 0.401 | 4.3E-02 | 3  | 5.1  |
| P62805 | Histone H4                                                 | 0.36 | 0.028 | 2.1E-14 | 7  | 52.4 |
| Q14204 | Cytoplasmic dynein 1 heavy chain 1                         | 0.35 | 0.065 | 4.0E-05 | 25 | 5.9  |
| P04075 | Fructose-bisphosphate aldolase A                           | 0.34 | 0.122 | 2.7E-03 | 13 | 43.1 |
| P26038 | Moesin                                                     | 0.34 | 0.098 | 1.5E-03 | 10 | 17.0 |
| P78417 | Glutathione S-transferase omega-1                          | 0.33 | 0.124 | 2.4E-10 | 9  | 31.1 |
| P07195 | L-lactate dehydrogenase B chain                            | 0.30 | 0.113 | 3.3E-04 | 8  | 26.3 |
| P22352 | Glutathione peroxidase 3                                   | 0.29 | 0.068 | 2.1E-12 | 3  | 11.5 |
| P06865 | Beta-hexosaminidase subunit alpha                          | 0.29 | 0.123 | 5.0E-06 | 10 | 18.7 |
| Q15149 | Plectin                                                    | 0.28 | 0.030 | 4.9E-14 | 51 | 12.0 |
| P13797 | Plastin-3                                                  | 0.28 | 0.089 | 3.9E-04 | 6  | 9.8  |
| O60506 | Heterogeneous nuclear ribonucleoprotein Q                  | 0.28 | 0.155 | 2.7E-02 | 3  | 5.6  |
| P11277 | Spectrin beta chain, erythrocytic                          | 0.28 | 0.235 | 2.2E-02 | 5  | 3.3  |
| Q9Y490 | Talin-1                                                    | 0.27 | 0.052 | 6.8E-10 | 31 | 14.8 |
| P04792 | Heat shock protein beta-1                                  | 0.26 | 0.056 | 9.5E-06 | 6  | 27.8 |
| Q14112 | Nidogen-2                                                  | 0.26 | 0.147 | 4.6E-07 | 9  | 7.3  |
| P26641 | Elongation factor 1-gamma                                  | 0.25 | 0.153 | 9.1E-03 | 5  | 10.5 |
| P49591 | Serine--tRNA ligase, cytoplasmic                           | 0.25 | 0.073 | 2.5E-03 | 3  | 9.9  |
| P60709 | Actin, cytoplasmic 1                                       | 0.25 | 0.051 | 1.3E-03 | 6  | 24.8 |
| P99999 | Cytochrome c                                               | 0.24 | 0.115 | 2.3E-04 | 3  | 24.8 |
| P21266 | Glutathione S-transferase Mu 3                             | 0.24 | 0.137 | 1.8E-03 | 3  | 12.4 |
| A1L0T0 | Acetolactate synthase-like protein                         | 0.23 | 0.044 | 8.0E-03 | 4  | 6.0  |
| Q15063 | Periostin                                                  | 0.23 | 0.161 | 1.9E-02 | 5  | 7.4  |
| P15531 | Nucleoside diphosphate kinase A                            | 0.23 | 0.108 | 4.0E-10 | 7  | 52.6 |
| P00558 | Phosphoglycerate kinase 1                                  | 0.22 | 0.104 | 1.8E-07 | 13 | 29.7 |
| P12109 | Collagen alpha-1(VI) chain                                 | 0.21 | 0.075 | 5.0E-06 | 11 | 11.5 |
| P08195 | 4F2 cell-surface antigen heavy chain                       | 0.20 | 0.104 | 2.1E-03 | 3  | 5.9  |
| P13760 | HLA class II histocompatibility antigen, DRB1-4 beta chain | 0.19 | 0.142 | 1.8E-02 | 5  | 20.7 |
| P02647 | Apolipoprotein A-I                                         | 0.18 | 0.138 | 6.7E-03 | 7  | 24.3 |
| P49368 | T-complex protein 1 subunit gamma                          | 0.17 | 0.056 | 2.0E-02 | 8  | 19.1 |
| Q99497 | Protein DJ-1                                               | 0.16 | 0.221 | 1.3E-03 | 6  | 28.0 |
| P62258 | 14-3-3 protein epsilon                                     | 0.16 | 0.116 | 3.7E-04 | 9  | 34.9 |
| P12110 | Collagen alpha-2(VI) chain                                 | 0.16 | 0.095 | 2.8E-04 | 8  | 7.9  |
| P07237 | Protein disulfide-isomerase                                | 0.16 | 0.111 | 2.6E-03 | 11 | 18.5 |
| P09874 | Poly [ADP-ribose] polymerase 1                             | 0.15 | 0.100 | 4.8E-02 | 5  | 5.6  |
| P60903 | Protein S100-A10                                           | 0.15 | 0.199 | 9.0E-03 | 4  | 41.2 |
| P09651 | Heterogeneous nuclear ribonucleoprotein A1                 | 0.13 | 0.049 | 9.9E-07 | 4  | 13.2 |
| P07355 | Annexin A2                                                 | 0.13 | 0.041 | 0.0E+00 | 23 | 54.6 |
| P78527 | DNA-dependent protein kinase catalytic subunit             | 0.12 | 0.058 | 2.0E-04 | 17 | 3.7  |
| P51888 | Prolargin                                                  | 0.12 | 0.112 | 0.0E+00 | 12 | 32.2 |
| P62851 | 40S ribosomal protein S25                                  | 0.12 | 0.068 | 3.7E-05 | 5  | 29.6 |
| Q01082 | Spectrin beta chain, non-erythrocytic 1                    | 0.11 | 0.038 | 0.0E+00 | 45 | 23.1 |
| P01871 | Ig mu chain C region                                       | 0.11 | 0.116 | 3.8E-05 | 7  | 18.8 |
| P49773 | Histidine triad nucleotide-binding protein 1               | 0.10 | 0.373 | 2.2E-02 | 4  | 42.9 |
| P62937 | Peptidyl-prolyl cis-trans isomerase A                      | 0.10 | 0.092 | 0.0E+00 | 7  | 35.2 |
| Q15582 | Transforming growth factor-beta-induced protein ig-h3      | 0.10 | 0.080 | 3.7E-02 | 3  | 4.7  |
| P01011 | Alpha-1-antichymotrypsin                                   | 0.10 | 0.102 | 1.4E-06 | 6  | 10.6 |
| P11216 | Glycogen phosphorylase, brain form                         | 0.09 | 0.119 | 1.1E-02 | 7  | 10.3 |
| P06733 | Alpha-enolase                                              | 0.08 | 0.100 | 2.1E-06 | 12 | 36.4 |
| P63104 | 14-3-3 protein zeta/delta                                  | 0.06 | 0.107 | 6.3E-03 | 6  | 29.8 |
| P21810 | Biglycan                                                   | 0.05 | 0.102 | 5.5E-12 | 7  | 20.1 |
| P39060 | Collagen alpha-1(XVIII) chain                              | 0.04 | 0.093 | 5.5E-08 | 9  | 5.8  |
| P18621 | 60S ribosomal protein L17                                  | 0.04 | 0.081 | 2.7E-03 | 4  | 19.0 |

Brown denotes change  $\geq 2$  standard deviations (SD) from the mean, yellow denotes change  $\geq 1$  SD and green highlights p values  $\leq 0.05$ . NA, not applicable, n<3 unique peptides.
