# Supplementary material for: iTRAQ Quantitative Proteomic Comparison of Metastatic and Non-Metastatic Uveal Melanoma Tumors
Source: PubMed Central journal article supplement (PMC4549237; doi:10.1371/journal.pone.0135543), 2015-08-25
Supplement: pone.0135543.s003.pdf [file pone.0135543.s003.pdf]

**Supplementary Table S3**  
**Relative Protein Abundance: Sample UM24, Metastatic**

Total Proteins Quantified = 723; LogMedian Protein Ratio = 0.05; LogMean Protein Ratio = 0; Standard Deviation = 0.81

| Uni-Prot<br>Accession | Protein                                                       | Ratio<br>UM/Control | Standard<br>Deviation | p value | Unique<br>Peptides | % Sequence<br>Coverage |
|-----------------------|---------------------------------------------------------------|---------------------|-----------------------|---------|--------------------|------------------------|
| P02768                | Serum albumin                                                 | 14.89               | 0.033                 | 0.0E+00 | 48                 | 64.7                   |
| P68871                | Hemoglobin subunit beta                                       | 9.54                | 0.070                 | 0.0E+00 | 6                  | 55.8                   |
| P69905                | Hemoglobin subunit alpha                                      | 8.80                | 0.067                 | 0.0E+00 | 7                  | 63.4                   |
| P00734                | Prothrombin                                                   | 8.75                | 0.227                 | 5.9E-03 | 7                  | 14.6                   |
| P02042                | Hemoglobin subunit delta                                      | 8.17                | 0.108                 | 1.6E-08 | 7                  | 59.2                   |
| P02787                | Serotransferrin                                               | 7.41                | 0.063                 | 0.0E+00 | 30                 | 42.7                   |
| P62937                | Peptidyl-prolyl cis-trans isomerase A                         | 7.29                | 0.082                 | 3.1E-12 | 10                 | 60.0                   |
| Q00796                | Sorbitol dehydrogenase                                        | 6.14                | 0.214                 | 3.4E-03 | 3                  | 4.8                    |
| P02765                | Alpha-2-HS-glycoprotein                                       | 5.87                | 0.173                 | 7.6E-06 | 5                  | 12.0                   |
| P02774                | Vitamin D-binding protein                                     | 5.40                | 0.115                 | 9.6E-08 | 15                 | 26.8                   |
| P02652                | Apolipoprotein A-II                                           | 5.28                | 0.115                 | 3.1E-03 | 4                  | 21.0                   |
| P59665                | Neutrophil defensin 1                                         | 5.13                | 0.135                 | 4.9E-05 | 3                  | 20.2                   |
| P43652                | Afamin                                                        | 4.85                | 0.152                 | 2.7E-02 | 4                  | 6.7                    |
| P23528                | Cofilin-1                                                     | 4.81                | 0.205                 | 4.7E-03 | 5                  | 33.7                   |
| P01857                | Ig gamma-1 chain C region                                     | 4.79                | 0.063                 | 1.6E-15 | 4                  | 18.8                   |
| P00558                | Phosphoglycerate kinase 1                                     | 4.63                | 0.089                 | 4.3E-06 | 11                 | 24.9                   |
| P06702                | Protein S100-A9                                               | 4.37                | 0.197                 | 1.1E-03 | 3                  | 30.7                   |
| P07737                | Profilin-1                                                    | 4.13                | 0.126                 | 5.8E-06 | 5                  | 39.3                   |
| Q8IV08                | Phospholipase D3                                              | 3.91                | 0.168                 | 2.6E-03 | 3                  | 6.3                    |
| P02790                | Hemopexin                                                     | 3.90                | 0.106                 | 2.3E-08 | 5                  | 13.2                   |
| P09601                | Heme oxygenase 1                                              | 3.87                | 0.209                 | 4.8E-02 | 4                  | 17.0                   |
| P05164                | Myeloperoxidase                                               | 3.75                | 0.077                 | 4.6E-14 | 13                 | 17.7                   |
| P78417                | Glutathione S-transferase omega-1                             | 3.74                | 0.164                 | 9.9E-04 | 6                  | 24.5                   |
| P01876                | Ig alpha-1 chain C region                                     | 3.73                | 0.130                 | 1.9E-04 | 7                  | 21.5                   |
| P08574                | Cytochrome c1, heme protein, mitochondrial                    | 3.60                | 0.127                 | 8.4E-05 | 5                  | 22.2                   |
| P00915                | Carbonic anhydrase 1                                          | 3.59                | 0.257                 | 1.7E-02 | 3                  | 11.5                   |
| P02647                | Apolipoprotein A-I                                            | 3.59                | 0.083                 | 1.6E-10 | 10                 | 39.3                   |
| Q13838                | Spliceosome RNA helicase DDX39B                               | 3.54                | 0.111                 | 7.5E-03 | 4                  | 9.6                    |
| P08758                | Annexin A5                                                    | 3.48                | 0.054                 | 0.0E+00 | 14                 | 46.3                   |
| P13639                | Elongation factor 2                                           | 3.45                | 0.102                 | 1.4E-04 | 8                  | 11.5                   |
| P05109                | Protein S100-A8                                               | 3.44                | 0.152                 | 3.2E-05 | 5                  | 39.8                   |
| P01042                | Kininogen-1                                                   | 3.36                | 0.101                 | 1.3E-03 | 8                  | 11.6                   |
| P05107                | Integrin beta-2                                               | 3.26                | 0.136                 | 1.0E-03 | 9                  | 12.1                   |
| P21796                | Voltage-dependent anion-selective channel protein 1           | 3.26                | 0.066                 | 1.3E-06 | 10                 | 42.8                   |
| P01834                | Ig kappa chain C region                                       | 3.23                | 0.072                 | 3.3E-04 | 4                  | 65.1                   |
| P35232                | Prohibitin                                                    | 3.17                | 0.064                 | 4.0E-11 | 12                 | 48.9                   |
| P01009                | Alpha-1-antitrypsin                                           | 3.13                | 0.075                 | 1.7E-08 | 19                 | 49.3                   |
| P84077                | ADP-ribosylation factor 1                                     | 3.13                | 0.155                 | 8.6E-04 | 3                  | 16.0                   |
| P05155                | Plasma protease C1 inhibitor                                  | 3.05                | 0.132                 | 1.4E-03 | 5                  | 12.0                   |
| P36955                | Pigment epithelium-derived factor                             | 3.04                | 0.103                 | 1.1E-04 | 8                  | 23.4                   |
| P13796                | Plastin-2                                                     | 3.02                | 0.160                 | 2.4E-03 | 3                  | 4.6                    |
| P33121                | Long-chain-fatty-acid-CoA ligase 1                            | 2.93                | 0.072                 | 4.4E-03 | 6                  | 9.6                    |
| P04406                | Glyceraldehyde-3-phosphate dehydrogenase                      | 2.90                | 0.044                 | 6.7E-16 | 10                 | 29.0                   |
| P62826                | GTP-binding nuclear protein Ran                               | 2.86                | 0.123                 | 4.8E-02 | 3                  | 13.9                   |
| P08238                | Heat shock protein HSP 90-beta                                | 2.79                | 0.103                 | 2.2E-03 | 6                  | 8.3                    |
| P07858                | Cathepsin B                                                   | 2.77                | 0.157                 | 1.2E-03 | 3                  | 10.6                   |
| P02751                | Fibronectin                                                   | 2.76                | 0.050                 | 3.6E-15 | 31                 | 19.1                   |
| P14618                | Pyruvate kinase PKM                                           | 2.74                | 0.067                 | 8.8E-10 | 15                 | 33.1                   |
| P19823                | Inter-alpha-trypsin inhibitor heavy chain H2                  | 2.66                | 0.115                 | 1.8E-02 | 3                  | 3.8                    |
| P45880                | Voltage-dependent anion-selective channel protein 2           | 2.65                | 0.082                 | 3.9E-05 | 7                  | 24.5                   |
| P08195                | 4F2 cell-surface antigen heavy chain                          | 2.54                | 0.113                 | 1.6E-04 | 8                  | 16.5                   |
| Q99623                | Prohibitin-2                                                  | 2.54                | 0.073                 | 1.7E-09 | 8                  | 29.4                   |
| P07339                | Cathepsin D                                                   | 2.53                | 0.148                 | 2.0E-05 | 8                  | 21.8                   |
| P06733                | Alpha-enolase                                                 | 2.52                | 0.091                 | 5.3E-03 | 11                 | 33.2                   |
| P01023                | Alpha-2-macroglobulin                                         | 2.52                | 0.051                 | 6.7E-07 | 14                 | 11.5                   |
| P02792                | Ferritin light chain                                          | 2.50                | 0.184                 | 2.8E-02 | 3                  | 13.1                   |
| Q8NBJ5                | Procollagen galactosyltransferase 1                           | 2.46                | 0.299                 | 4.0E-02 | 3                  | 5.0                    |
| P60842                | Eukaryotic initiation factor 4A-I                             | 2.41                | 0.181                 | 4.6E-02 | 4                  | 11.8                   |
| O75083                | WD repeat-containing protein 1                                | 2.37                | 0.237                 | 1.1E-02 | 3                  | 7.6                    |
| Q15063                | Periostin                                                     | 2.35                | 0.124                 | 1.7E-03 | 9                  | 15.2                   |
| P07900                | Heat shock protein HSP 90-alpha                               | 2.31                | 0.080                 | 1.4E-04 | 9                  | 12.4                   |
| P00747                | Plasminogen                                                   | 2.30                | 0.088                 | 3.1E-06 | 13                 | 17.2                   |
| Q08211                | ATP-dependent RNA helicase A                                  | 2.28                | 0.147                 | 5.0E-03 | 4                  | 3.9                    |
| P16401                | Histone H1.5                                                  | 2.28                | 0.123                 | 2.9E-03 | 3                  | 14.6                   |
| P19367                | Hexokinase-1                                                  | 2.25                | 0.098                 | 1.4E-04 | 10                 | 11.9                   |
| Q9P2R7                | Succinyl-CoA ligase [ADP-forming] subunit beta, mitochondrial | 7.32                | NA                    | NA      | 2                  | 3.2                    |
| P27169                | Serum paraoxonase/arylesterase 1                              | 6.83                | NA                    | NA      | 2                  | 5.4                    |
| P02763                | Alpha-1-acid glycoprotein 1                                   | 5.46                | NA                    | NA      | 2                  | 11.9                   |
| P30043                | Flavin reductase (NADPH)                                      | 5.31                | NA                    | NA      | 2                  | 14.1                   |
| P17213                | Bactericidal permeability-increasing protein                  | 5.01                | NA                    | NA      | 2                  | 3.5                    |
| P01859                | Ig gamma-2 chain C region                                     | 4.45                | NA                    | NA      | 2                  | 7.7                    |
| P0CG05                | Ig lambda-2 chain C regions                                   | 4.43                | NA                    | NA      | 2                  | 27.4                   |
| P22087                | rRNA 2'-O-methyltransferase fibrillar                         | 3.71                | 0.242                 | 8.1E-02 | 3                  | 10.9                   |
| P31146                | Coronin-1A                                                    | 3.54                | NA                    | NA      | 2                  | 5.9                    |
| Q8NBJ7                | Sulfatase-modifying factor 2                                  | 3.34                | NA                    | NA      | 2                  | 10.0                   |
| Q96C86                | m7GpppX diphosphatase                                         | 3.19                | NA                    | NA      | 2                  | 7.1                    |
| P24158                | Myeloblastin                                                  | 3.17                | NA                    | NA      | 2                  | 7.8                    |
| P16152                | Carbonyl reductase [NADPH] 1                                  | 3.09                | NA                    | NA      | 2                  | 10.5                   |
| P07093                | Glia-derived nexin                                            | 3.08                | NA                    | NA      | 2                  | 6.5                    |
| Q16658                | Fascin                                                        | 3.07                | NA                    | NA      | 2                  | 5.3                    |
| P40967                | Melanocyte protein PMEL                                       | 3.02                | NA                    | NA      | 2                  | 3.3                    |
| P11766                | Alcohol dehydrogenase class-3                                 | 2.98                | 0.399                 | 8.8E-02 | 3                  | 7.0                    |
| P41218                | Myeloid cell nuclear differentiation antigen                  | 2.91                | 0.286                 | 4.2E-01 | 3                  | 7.1                    |
| P23381                | Tryptophan-tRNA ligase, cytoplasmic                           | 2.85                | NA                    | NA      | 2                  | 3.2                    |
| P30044                | Peroxisomal protein, mitochondrial                            | 2.76                | NA                    | NA      | 2                  | 10.3                   |
| P52566                | Rho GDP-dissociation inhibitor 2                              | 2.75                | NA                    | NA      | 2                  | 12.4                   |
| Q15029                | 116 kDa U5 small nuclear ribonucleoprotein component          | 2.71                | NA                    | NA      | 2                  | 2.0                    |
| Q92688                | Acidic leucine-rich nuclear phosphoprotein 32 family member B | 2.71                | NA                    | NA      | 2                  | 6.8                    |
| Q13098                | COP9 signalosome complex subunit 1                            | 2.68                | NA                    | NA      | 2                  | 5.7                    |
| P07919                | Cytochrome b-c1 complex subunit 6, mitochondrial              | 2.65                | NA                    | NA      | 2                  | 35.2                   |
| Q9Y2X3                | Nucleolar protein 58                                          | 2.64                | NA                    | NA      | 2                  | 5.3                    |
| Q13303                | Voltage-gated potassium channel subunit beta-2                | 2.60                | NA                    | NA      | 2                  | 5.7                    |
| P04440                | HLA class II histocompatibility antigen, DP beta 1 chain      | 2.59                | NA                    | NA      | 2                  | 7.8                    |
| P08246                | Neutrophil elastase                                           | 2.59                | NA                    | NA      | 2                  | 6.4                    |
| P31948                | Stress-induced-phosphoprotein 1                               | 2.53                | NA                    | NA      | 2                  | 4.1                    |
| P01625                | Ig kappa chain V-IV region Len                                | 2.53                | NA                    | NA      | 2                  | 21.1                   |
| P23526                | Adenosylhomocysteinase                                        | 2.51                | NA                    | NA      | 2                  | 6.5                    |
| Q9Y5X3                | Sorting nexin-5                                               | 2.50                | NA                    | NA      | 2                  | 5.4                    |
| P62158                | Calmodulin                                                    | 2.49                | NA                    | NA      | 2                  | 22.1                   |
| P02786                | Transferrin receptor protein 1                                | 2.43                | NA                    | NA      | 2                  | 3.2                    |

Table S3-Sample UM24

|        |                                                                                |      |        |         |    |      |
|--------|--------------------------------------------------------------------------------|------|--------|---------|----|------|
| O43776 | Asparagine-tRNA ligase, cytoplasmic                                            | 2.42 | NA     | NA      | 2  | 5.7  |
| Q1KMD3 | Heterogeneous nuclear ribonucleoprotein U-like protein 2                       | 2.38 | 0.375  | 1.7E-01 | 3  | 3.1  |
| P01620 | Ig kappa chain V-III region SIE                                                | 2.37 | NA     | NA      | 2  | 31.2 |
| P63241 | Eukaryotic translation initiation factor 5A-1                                  | 2.36 | 0.298  | 5.4E-02 | 4  | 27.9 |
| Q99523 | Sortilin                                                                       | 2.36 | NA     | NA      | 2  | 2.6  |
| O00299 | Chloride intracellular channel protein 1                                       | 2.32 | 0.472  | 1.6E-01 | 4  | 24.9 |
| P12429 | Annexin A3                                                                     | 2.29 | NA     | NA      | 2  | 6.2  |
| P51810 | G-protein coupled receptor 143                                                 | 2.27 | NA     | NA      | 2  | 5.7  |
| P22234 | Multifunctional protein ADE2                                                   | 2.25 | NA     | NA      | 2  | 3.3  |
| P09211 | Glutathione S-transferase P                                                    | 2.24 | 0.183  | 9.3E-02 | 7  | 48.1 |
| O14556 | Glyceraldehyde-3-phosphate dehydrogenase, testis-specific                      | 2.23 | 0.075  | 4.0E-02 | 3  | 10.3 |
| Q12906 | Interleukin enhancer-binding factor 3                                          | 2.23 | 0.110  | 7.9E-03 | 6  | 8.9  |
| P35613 | Basigin                                                                        | 2.22 | NA     | NA      | 2  | 8.3  |
| P20702 | Integrin alpha-X                                                               | 2.20 | 0.341  | 2.8E-01 | 3  | 2.8  |
| P61626 | Lysozyme C                                                                     | 2.19 | NA     | NA      | 2  | 12.8 |
| Q7Z7H5 | Transmembrane emp24 domain-containing protein 4                                | 2.17 | NA     | NA      | 2  | 9.7  |
| P06727 | Apolipoprotein A-IV                                                            | 2.15 | 0.065  | 2.6E-10 | 17 | 41.9 |
| P00751 | Complement factor B                                                            | 2.13 | 0.175  | 1.7E-02 | 5  | 5.4  |
| P06748 | Nucleophosmin                                                                  | 2.12 | 0.076  | 2.4E-04 | 5  | 15.0 |
| P62241 | 40S ribosomal protein S8                                                       | 2.12 | NA     | NA      | 2  | 9.1  |
| Q6PIU2 | Neutral cholesterol ester hydrolase 1                                          | 2.10 | NA     | NA      | 2  | 4.7  |
| Q00341 | Vigilin                                                                        | 2.10 | NA     | NA      | 2  | 1.7  |
| P50454 | Serpin H1                                                                      | 2.09 | 0.083  | 3.7E-04 | 6  | 17.7 |
| P22695 | Cytochrome b-c1 complex subunit 2, mitochondrial                               | 2.09 | 0.083  | 1.6E-05 | 5  | 15.0 |
| P11279 | Lysosome-associated membrane glycoprotein 1                                    | 2.08 | NA     | NA      | 2  | 4.1  |
| P43490 | Nicotinamide phosphoribosyltransferase                                         | 2.08 | NA     | NA      | 2  | 3.1  |
| P51149 | Ras-related protein Rab-7a                                                     | 2.06 | 0.064  | 1.3E-06 | 6  | 32.9 |
| P26599 | Polypyrimidine tract-binding protein 1                                         | 2.04 | 0.399  | 2.3E-01 | 3  | 3.6  |
| Q9UKM9 | RNA-binding protein Raly                                                       | 2.03 | NA     | NA      | 2  | 7.2  |
| Q16610 | Extracellular matrix protein 1                                                 | 2.03 | NA     | NA      | 2  | 4.8  |
| Q07960 | Rho GTPase-activating protein 1                                                | 2.02 | 0.219  | 1.1E-01 | 3  | 5.0  |
| P54136 | Arginine-tRNA ligase, cytoplasmic                                              | 2.00 | 0.182  | 3.6E-02 | 4  | 7.4  |
| Q9UPN3 | Microtubule-actin cross-linking factor 1, isoforms 1/2/3/5                     | 1.99 | NA     | NA      | 2  | 0.5  |
| P50213 | Isocitrate dehydrogenase [NAD] subunit alpha, mitochondrial                    | 1.99 | NA     | NA      | 2  | 6.0  |
| Q15907 | Ras-related protein Rab-11B                                                    | 1.97 | 0.131  | 4.4E-02 | 3  | 12.4 |
| P46063 | ATP-dependent DNA helicase Q1                                                  | 1.96 | NA     | NA      | 2  | 3.5  |
| P16070 | CD44 antigen                                                                   | 1.96 | 0.279  | 2.3E-01 | 6  | 8.8  |
| Q00839 | Heterogeneous nuclear ribonucleoprotein U                                      | 1.96 | 0.152  | 1.1E-02 | 8  | 9.0  |
| P11215 | Integrin alpha-M                                                               | 1.95 | 0.385  | 2.8E-01 | 3  | 3.0  |
| P10809 | 60 kDa heat shock protein, mitochondrial                                       | 1.95 | 0.080  | 7.0E-04 | 7  | 12.6 |
| P52272 | Heterogeneous nuclear ribonucleoprotein M                                      | 1.94 | 0.103  | 7.0E-05 | 9  | 14.0 |
| P78527 | DNA-dependent protein kinase catalytic subunit                                 | 1.93 | 0.100  | 9.5E-04 | 12 | 3.3  |
| Q13423 | NAD(P) transhydrogenase, mitochondrial                                         | 1.93 | 0.144  | 1.1E-03 | 9  | 9.2  |
| P31930 | Cytochrome b-c1 complex subunit 1, mitochondrial                               | 1.92 | 0.072  | 1.3E-03 | 6  | 17.7 |
| Q6UW68 | Transmembrane protein 205                                                      | 1.92 | NA     | NA      | 2  | 10.6 |
| P08603 | Complement factor H                                                            | 1.92 | 0.224  | 4.0E-02 | 5  | 4.2  |
| Q9NVH1 | DnaJ homolog subfamily C member 11                                             | 1.92 | NA     | NA      | 2  | 4.8  |
| P60174 | Triosephosphate isomerase                                                      | 1.89 | 0.033  | 7.8E-04 | 5  | 20.3 |
| O15371 | Eukaryotic translation initiation factor 3 subunit D                           | 1.89 | NA     | NA      | 2  | 3.5  |
| Q14974 | Importin subunit beta-1                                                        | 1.86 | 0.053  | 2.4E-02 | 4  | 7.2  |
| O00160 | Unconventional myosin-Ib                                                       | 1.86 | NA     | NA      | 2  | 2.1  |
| O15118 | Niemann-Pick C1 protein                                                        | 1.86 | NA     | NA      | 2  | 1.2  |
| Q08945 | FACT complex subunit SSRP1                                                     | 1.85 | NA     | NA      | 2  | 2.0  |
| P46940 | Ras GTPase-activating-like protein IQGAP1                                      | 1.84 | 0.136  | 1.3E-03 | 10 | 6.3  |
| P26641 | Elongation factor 1-gamma                                                      | 1.84 | 0.128  | 3.4E-02 | 6  | 14.4 |
| Q08380 | Galectin-3-binding protein                                                     | 1.83 | 0.148  | 8.1E-03 | 5  | 11.6 |
| P22314 | Ubiquitin-like modifier-activating enzyme 1                                    | 1.82 | 0.222  | 7.4E-02 | 4  | 3.9  |
| P01860 | Ig gamma-3 chain C region                                                      | 1.79 | NA     | NA      | 2  | 3.2  |
| O43390 | Heterogeneous nuclear ribonucleoprotein R                                      | 1.78 | 0.107  | 3.2E-02 | 5  | 6.5  |
| P63104 | 14-3-3 protein zeta/delta                                                      | 1.78 | 0.114  | 4.8E-02 | 4  | 22.9 |
| Q16698 | 2,4-dienoyl-CoA reductase, mitochondrial                                       | 1.75 | 0.274  | 1.9E-01 | 3  | 11.3 |
| P61421 | V-type proton ATPase subunit d 1                                               | 1.75 | 0.102  | 2.1E-03 | 5  | 12.8 |
| P49755 | Transmembrane emp24 domain-containing protein 10                               | 1.75 | 0.363  | 1.3E-01 | 4  | 22.4 |
| P62847 | 40S ribosomal protein S24                                                      | 1.75 | NA     | NA      | 2  | 19.5 |
| P07814 | Bifunctional glutamate/proline-tRNA ligase                                     | 1.75 | NA     | NA      | 2  | 1.9  |
| P02654 | Apolipoprotein C-I                                                             | 1.73 | 0.081  | 4.0E-04 | 4  | 34.9 |
| P19338 | Nucleolin                                                                      | 1.73 | 0.097  | 7.7E-03 | 7  | 10.0 |
| P04040 | Catalase                                                                       | 1.72 | 0.112  | 6.9E-02 | 5  | 11.0 |
| Q8LUX7 | Adipocyte enhancer-binding protein 1                                           | 1.71 | 0.146  | 1.7E-02 | 5  | 6.4  |
| P29401 | Transketolase                                                                  | 1.70 | 0.232  | 3.0E-01 | 5  | 6.3  |
| O15144 | Actin-related protein 2/3 complex subunit 2                                    | 1.70 | 0.040  | 6.5E-05 | 4  | 12.7 |
| Q5VTE0 | Putative elongation factor 1-alpha-like 3                                      | 1.70 | 0.051  | 3.4E-06 | 12 | 27.9 |
| P04114 | Apolipoprotein B-100                                                           | 1.70 | 0.276  | 1.0E-01 | 3  | 0.6  |
| Q9NX63 | Coiled-coil-helix-coiled-coil-helix domain-containing protein 3, mitochondrial | 1.67 | NA     | NA      | 2  | 9.3  |
| P06576 | ATP synthase subunit beta, mitochondrial                                       | 1.67 | 0.064  | 1.1E-07 | 15 | 35.0 |
| Q9UJZ1 | Stomatin-like protein 2, mitochondrial                                         | 1.66 | NA     | NA      | 2  | 10.4 |
| P04080 | Cystatin-B                                                                     | 1.66 | 0.065  | 5.2E-03 | 3  | 39.8 |
| P59998 | Actin-related protein 2/3 complex subunit 4                                    | 1.65 | 1.427  | 4.1E-01 | 3  | 16.1 |
| P07910 | Heterogeneous nuclear ribonucleoproteins C1/C2                                 | 1.65 | 0.094  | 2.4E-03 | 9  | 26.1 |
| P08237 | ATP-dependent 6-phosphofructokinase, muscle type                               | 1.65 | 0.218  | 1.4E-01 | 4  | 6.8  |
| P21912 | Succinate dehydrogenase [ubiquinone] iron-sulfur subunit, mitochondrial        | 1.65 | 0.088  | 8.0E-03 | 3  | 11.4 |
| P02675 | Fibrinogen beta chain                                                          | 1.64 | 0.057  | 4.0E-04 | 14 | 31.6 |
| Q15181 | Inorganic pyrophosphatase                                                      | 1.64 | NA     | NA      | 2  | 6.6  |
| Q9Y4W6 | AFG3-like protein 2                                                            | 1.63 | 0.143  | 4.6E-01 | 3  | 3.5  |
| P23284 | Peptidyl-prolyl cis-trans isomerase B                                          | 1.63 | 0.061  | 6.1E-05 | 11 | 43.5 |
| P02746 | Complement C1q subcomponent subunit B                                          | 1.62 | NA     | NA      | 2  | 8.7  |
| O75390 | Citrate synthase, mitochondrial                                                | 1.62 | 0.079  | 2.6E-03 | 6  | 13.7 |
| P02671 | Fibrinogen alpha chain                                                         | 1.61 | 0.066  | 5.2E-04 | 11 | 14.8 |
| P04217 | Alpha-1B-glycoprotein                                                          | 1.61 | 0.242  | 2.3E-01 | 3  | 6.3  |
| P31040 | Succinate dehydrogenase [ubiquinone] flavoprotein subunit, mitochondrial       | 1.61 | 0.162  | 1.4E-02 | 5  | 10.2 |
| P11142 | Heat shock cognate 71 kDa protein                                              | 1.61 | 0.074  | 6.6E-05 | 10 | 12.1 |
| P02452 | Collagen alpha-1(I) chain                                                      | 1.60 | 12.316 | 5.7E-01 | 3  | 2.7  |
| Q99497 | Protein DJ-1                                                                   | 1.59 | 0.276  | 3.4E-01 | 3  | 20.6 |
| Q95302 | Peptidyl-prolyl cis-trans isomerase FKBP9                                      | 1.58 | NA     | NA      | 2  | 3.7  |
| P09651 | Heterogeneous nuclear ribonucleoprotein A1                                     | 1.57 | 0.089  | 2.8E-04 | 10 | 33.1 |
| P01034 | Cystatin-C                                                                     | 1.57 | 0.084  | 1.3E-02 | 3  | 30.8 |
| P51572 | B-cell receptor-associated protein 31                                          | 1.57 | 0.105  | 1.3E-02 | 6  | 25.6 |
| P04196 | Histidine-rich glycoprotein                                                    | 1.56 | 0.105  | 4.5E-02 | 6  | 9.3  |
| P15531 | Nucleoside diphosphate kinase A                                                | 1.55 | 0.054  | 1.8E-03 | 4  | 31.6 |
| P09525 | Annexin A4                                                                     | 1.55 | 0.083  | 6.4E-04 | 8  | 22.6 |
| P05090 | Apolipoprotein D                                                               | 1.53 | 0.151  | 1.3E-01 | 3  | 15.9 |
| P43243 | Matrin-3                                                                       | 1.52 | NA     | NA      | 2  | 3.4  |
| O00231 | 26S proteasome non-ATPase regulatory subunit 11                                | 1.52 | 0.070  | 4.6E-02 | 4  | 9.5  |
| P52565 | Rho GDP-dissociation inhibitor 1                                               | 1.52 | NA     | NA      | 2  | 15.2 |
| P63000 | Ras-related C3 botulinum toxin substrate 1                                     | 1.51 | 0.103  | 1.3E-01 | 3  | 17.2 |
| P06737 | Glycogen phosphorylase, liver form                                             | 1.51 | 0.183  | 5.9E-02 | 6  | 8.1  |
| Q12905 | Interleukin enhancer-binding factor 2                                          | 1.50 | 0.163  | 3.8E-02 | 4  | 13.8 |

Table S3-Sample UM24

|        |                                                                               |      |        |         |    |      |
|--------|-------------------------------------------------------------------------------|------|--------|---------|----|------|
| P52597 | Heterogeneous nuclear ribonucleoprotein F                                     | 1.50 | 0.515  | 3.4E-01 | 3  | 7.0  |
| P14868 | Aspartate--tRNA ligase, cytoplasmic                                           | 1.49 | 0.164  | 4.9E-02 | 5  | 13.4 |
| Q13162 | Peroxisomal protein 4                                                         | 1.49 | NA     | NA      | 2  | 8.9  |
| O60506 | Heterogeneous nuclear ribonucleoprotein Q                                     | 1.49 | NA     | NA      | 2  | 2.9  |
| P05388 | 60S acidic ribosomal protein P0                                               | 1.49 | 0.104  | 2.9E-02 | 4  | 13.6 |
| P13010 | X-ray repair cross-complementing protein 5                                    | 1.48 | 0.258  | 7.0E-02 | 6  | 8.1  |
| Q9Y6C9 | Mitochondrial carrier homolog 2                                               | 1.48 | 0.096  | 5.8E-02 | 3  | 16.5 |
| P38606 | V-type proton ATPase catalytic subunit A                                      | 1.48 | 0.111  | 5.5E-02 | 6  | 9.2  |
| P30484 | HLA class I histocompatibility antigen, B-46 alpha chain                      | 1.47 | NA     | NA      | 2  | 9.4  |
| Q555J5 | Heterochromatin protein 1-binding protein 3                                   | 1.47 | 2.614  | 4.2E-01 | 4  | 7.8  |
| P19827 | Inter-alpha-trypsin inhibitor heavy chain H1                                  | 1.46 | 0.114  | 3.0E-02 | 3  | 4.8  |
| Q43175 | D-3-phosphoglycerate dehydrogenase                                            | 1.46 | NA     | NA      | 2  | 5.1  |
| P09874 | Poly [ADP-ribose] polymerase 1                                                | 1.45 | NA     | NA      | 2  | 2.3  |
| P14406 | Cytochrome c oxidase subunit 7A2, mitochondrial                               | 1.45 | NA     | NA      | 2  | 27.7 |
| O15143 | Actin-related protein 2/3 complex subunit 1B                                  | 1.45 | NA     | NA      | 2  | 6.7  |
| B5ME19 | Eukaryotic translation initiation factor 3 subunit C-like protein             | 1.45 | NA     | NA      | 2  | 2.3  |
| Q13151 | Heterogeneous nuclear ribonucleoprotein A0                                    | 1.45 | 0.124  | 2.6E-02 | 5  | 19.3 |
| P02679 | Fibrinogen gamma chain                                                        | 1.45 | 0.130  | 1.8E-02 | 17 | 40.2 |
| P30050 | 60S ribosomal protein L12                                                     | 1.44 | NA     | NA      | 2  | 17.0 |
| O75533 | Splicing factor 3B subunit 1                                                  | 1.44 | NA     | NA      | 2  | 1.7  |
| Q93050 | V-type proton ATPase 116 kDa subunit a isoform 1                              | 1.44 | 0.158  | 1.6E-02 | 4  | 5.0  |
| Q13185 | Chromobox protein homolog 3                                                   | 1.44 | 0.067  | 4.7E-02 | 3  | 19.7 |
| P05141 | ADP/ATP translocase 2                                                         | 1.43 | 0.236  | 2.3E-01 | 4  | 9.1  |
| P43304 | Glycerol-3-phosphate dehydrogenase, mitochondrial                             | 1.43 | NA     | NA      | 2  | 3.2  |
| Q9UHX1 | Poly(U)-binding-splicing factor PUF60                                         | 1.42 | NA     | NA      | 2  | 5.4  |
| P83731 | 60S ribosomal protein L24                                                     | 1.42 | NA     | NA      | 2  | 11.5 |
| Q14108 | Lysosome membrane protein 2                                                   | 1.42 | 0.168  | 1.2E-01 | 4  | 10.5 |
| P17987 | T-complex protein 1 subunit alpha                                             | 1.42 | 0.397  | 2.2E-01 | 3  | 5.6  |
| P01024 | Complement C3                                                                 | 1.41 | 0.215  | 2.2E-02 | 23 | 14.6 |
| P37837 | Transaldolase                                                                 | 1.41 | 0.157  | 1.4E-01 | 4  | 11.3 |
| Q9BVK6 | Transmembrane emp24 domain-containing protein 9                               | 1.40 | NA     | NA      | 2  | 8.1  |
| P54920 | Alpha-soluble NSF attachment protein                                          | 1.39 | 0.529  | 4.6E-01 | 3  | 10.5 |
| P22626 | Heterogeneous nuclear ribonucleoproteins A2/B1                                | 1.39 | 0.056  | 1.0E-04 | 12 | 31.4 |
| P61160 | Actin-related protein 2                                                       | 1.39 | 0.080  | 5.5E-02 | 3  | 10.7 |
| Q07955 | Serine/arginine-rich splicing factor 1                                        | 1.39 | NA     | NA      | 2  | 8.5  |
| O15511 | Actin-related protein 2/3 complex subunit 5                                   | 1.38 | 0.098  | 2.4E-01 | 3  | 17.2 |
| Q99805 | Transmembrane 9 superfamily member 2                                          | 1.38 | NA     | NA      | 2  | 3.9  |
| P46459 | Vesicle-fusing ATPase                                                         | 1.38 | NA     | NA      | 2  | 3.1  |
| P39656 | Dolichyl-diphosphooligosaccharide--protein glycosyltransferase 48 kDa subunit | 1.38 | 0.125  | 2.0E-02 | 5  | 10.7 |
| Q9Y6N5 | Sulfide:quinone oxidoreductase, mitochondrial                                 | 1.38 | 1.616  | 1.9E-01 | 5  | 13.6 |
| P21281 | V-type proton ATPase subunit B, brain isoform                                 | 1.37 | 0.090  | 1.4E-02 | 4  | 10.4 |
| Q15365 | Poly(rC)-binding protein 1                                                    | 1.37 | 0.020  | 2.6E-01 | 4  | 11.2 |
| P12956 | X-ray repair cross-complementing protein 6                                    | 1.37 | 0.103  | 9.9E-03 | 9  | 16.1 |
| Q13510 | Acid ceramidase                                                               | 1.37 | NA     | NA      | 2  | 5.1  |
| P06744 | Glucose-6-phosphate isomerase                                                 | 1.37 | NA     | NA      | 2  | 4.3  |
| P07602 | Prosaposin                                                                    | 1.37 | 0.474  | 2.1E-01 | 5  | 8.4  |
| Q13200 | 26S proteasome non-ATPase regulatory subunit 2                                | 1.37 | 0.153  | 1.3E-01 | 3  | 3.4  |
| P10599 | Thioredoxin                                                                   | 1.36 | 0.360  | 7.4E-02 | 4  | 39.0 |
| P51665 | 26S proteasome non-ATPase regulatory subunit 7                                | 1.36 | NA     | NA      | 2  | 9.6  |
| P36543 | V-type proton ATPase subunit E 1                                              | 1.36 | NA     | NA      | 2  | 7.5  |
| Q9Y394 | Dehydrogenase/reductase SDR family member 7                                   | 1.35 | NA     | NA      | 2  | 8.8  |
| P14625 | Endoplasmic reticulum chaperone                                               | 1.35 | 0.062  | 4.6E-05 | 16 | 21.9 |
| P26196 | Probable ATP-dependent RNA helicase DDX6                                      | 1.34 | NA     | NA      | 2  | 5.8  |
| P04075 | Fructose-bisphosphate aldolase A                                              | 1.34 | 0.071  | 8.5E-03 | 14 | 44.5 |
| P30533 | Alpha-2-macroglobulin receptor-associated protein                             | 1.33 | 0.178  | 2.3E-01 | 3  | 8.1  |
| Q14697 | Neutral alpha-glucosidase AB                                                  | 1.33 | 0.101  | 2.9E-02 | 9  | 9.7  |
| P61158 | Actin-related protein 3                                                       | 1.33 | 4.630  | 1.9E-01 | 3  | 10.3 |
| P46977 | Dolichyl-diphosphooligosaccharide--protein glycosyltransferase subunit STT3A  | 1.33 | NA     | NA      | 2  | 2.3  |
| P53618 | Coatomer subunit beta                                                         | 1.32 | NA     | NA      | 2  | 3.4  |
| P50995 | Annexin A11                                                                   | 1.32 | 0.330  | 1.2E-01 | 5  | 9.3  |
| P08311 | Cathepsin G                                                                   | 1.32 | 0.093  | 1.4E-02 | 4  | 18.8 |
| P30041 | Peroxisomal protein 6                                                         | 1.32 | 0.257  | 1.9E-01 | 5  | 21.9 |
| P35998 | 26S proteasome regulatory subunit 7                                           | 1.31 | 0.301  | 2.3E-01 | 3  | 8.5  |
| Q15582 | Transforming growth factor-beta-induced protein ig-h3                         | 1.31 | 0.217  | 8.8E-02 | 7  | 10.7 |
| Q07020 | 60S ribosomal protein L18                                                     | 1.31 | NA     | NA      | 2  | 13.8 |
| Q14152 | Eukaryotic translation initiation factor 3 subunit A                          | 1.31 | NA     | NA      | 2  | 1.9  |
| Q9UNM6 | 26S proteasome non-ATPase regulatory subunit 13                               | 1.31 | 0.061  | 9.0E-02 | 3  | 8.8  |
| P46939 | Utrophin                                                                      | 1.30 | 1.567  | 6.0E-01 | 3  | 1.1  |
| P27824 | Calnexin                                                                      | 1.30 | 0.317  | 9.3E-02 | 10 | 18.8 |
| O75367 | Core histone macro-H2A.1                                                      | 1.29 | 0.495  | 1.8E-01 | 8  | 26.3 |
| Q92841 | Probable ATP-dependent RNA helicase DDX17                                     | 1.29 | 0.205  | 1.2E-01 | 5  | 7.3  |
| Q9HB90 | Ras-related GTP-binding protein C                                             | 1.29 | NA     | NA      | 2  | 5.5  |
| P62136 | Serine/threonine-protein phosphatase PP1-alpha catalytic subunit              | 1.29 | 0.240  | 4.8E-01 | 3  | 8.5  |
| Q9BS26 | Endoplasmic reticulum resident protein 44                                     | 1.28 | 0.168  | 6.3E-02 | 5  | 9.9  |
| O43242 | 26S proteasome non-ATPase regulatory subunit 3                                | 1.28 | 0.130  | 1.9E-01 | 3  | 4.5  |
| P14866 | Heterogeneous nuclear ribonucleoprotein L                                     | 1.28 | 0.305  | 2.4E-01 | 4  | 8.3  |
| Q15233 | Non-POU domain-containing octamer-binding protein                             | 1.27 | NA     | NA      | 2  | 4.9  |
| P11177 | Pyruvate dehydrogenase E1 component subunit beta, mitochondrial               | 1.27 | NA     | NA      | 2  | 4.2  |
| O43852 | Calumenin                                                                     | 1.26 | 0.441  | 2.7E-01 | 3  | 14.0 |
| P23396 | 40S ribosomal protein S3                                                      | 1.26 | 0.138  | 3.8E-02 | 6  | 19.8 |
| P00403 | Cytochrome c oxidase subunit 2                                                | 1.26 | NA     | NA      | 2  | 7.5  |
| Q13263 | Transcription intermediary factor 1-beta                                      | 1.26 | NA     | NA      | 2  | 2.4  |
| P21266 | Glutathione S-transferase Mu 3                                                | 1.25 | NA     | NA      | 2  | 9.8  |
| Q8NBQ5 | Estradiol 17-beta-dehydrogenase 11                                            | 1.25 | NA     | NA      | 2  | 8.7  |
| P07237 | Protein disulfide-isomerase                                                   | 1.25 | 0.206  | 1.3E-01 | 11 | 18.5 |
| P11021 | 78 kDa glucose-regulated protein                                              | 1.25 | 0.084  | 3.8E-03 | 25 | 41.1 |
| O00303 | Eukaryotic translation initiation factor 3 subunit F                          | 1.25 | NA     | NA      | 2  | 8.1  |
| P0CW22 | 40S ribosomal protein S17-like                                                | 1.25 | NA     | NA      | 2  | 16.3 |
| Q86UP2 | Kinectin                                                                      | 1.24 | 11.418 | 3.3E-01 | 5  | 4.7  |
| Q7L5N1 | COP9 signalosome complex subunit 6                                            | 1.23 | NA     | NA      | 2  | 6.7  |
| P31943 | Heterogeneous nuclear ribonucleoprotein H                                     | 1.23 | NA     | NA      | 2  | 6.7  |
| Q00325 | Phosphate carrier protein, mitochondrial                                      | 1.23 | 0.292  | 2.3E-01 | 6  | 14.4 |
| P55084 | Trifunctional enzyme subunit beta, mitochondrial                              | 1.23 | 0.116  | 3.1E-02 | 10 | 19.0 |
| P63244 | Guanine nucleotide-binding protein subunit beta-2-like 1                      | 1.22 | 0.082  | 2.6E-01 | 3  | 9.8  |
| P31949 | Protein S100-A11                                                              | 1.22 | NA     | NA      | 2  | 17.1 |
| P02776 | Platelet factor 4                                                             | 1.22 | 0.797  | 7.7E-01 | 3  | 26.7 |
| P28482 | Mitogen-activated protein kinase 1                                            | 1.22 | NA     | NA      | 2  | 5.0  |
| P31689 | DnaJ homolog subfamily A member 1                                             | 1.21 | NA     | NA      | 2  | 4.8  |
| Q8TCT9 | Minor histocompatibility antigen H13                                          | 1.21 | NA     | NA      | 2  | 5.8  |
| Q8N5K1 | CDGSH iron-sulfur domain-containing protein 2                                 | 1.21 | 0.201  | 2.1E-01 | 3  | 23.7 |
| P32969 | 60S ribosomal protein L9                                                      | 1.21 | NA     | NA      | 2  | 5.7  |
| Q9Y265 | RuvB-like 1                                                                   | 1.21 | 0.339  | 5.4E-01 | 3  | 11.2 |
| P08575 | Receptor-type tyrosine-protein phosphatase C                                  | 1.20 | NA     | NA      | 2  | 1.7  |
| P40939 | Trifunctional enzyme subunit alpha, mitochondrial                             | 1.20 | 0.124  | 1.1E-01 | 16 | 22.9 |
| P08697 | Alpha-2-antiplasmin                                                           | 1.20 | 0.292  | 6.8E-01 | 4  | 11.4 |
| P18124 | 60S ribosomal protein L7                                                      | 1.19 | 0.534  | 3.5E-01 | 4  | 15.7 |
| Q16891 | Mitochondrial inner membrane protein                                          | 1.19 | 0.141  | 4.7E-01 | 6  | 9.6  |

Table S3-Sample UM24

|        |                                                                                                                 |      |        |         |    |      |
|--------|-----------------------------------------------------------------------------------------------------------------|------|--------|---------|----|------|
| Q16270 | Insulin-like growth factor-binding protein 7                                                                    | 1.18 | 0.305  | 2.6E-01 | 3  | 10.6 |
| P39023 | 60S ribosomal protein L3                                                                                        | 1.18 | 0.002  | 7.7E-04 | 4  | 10.7 |
| P62829 | 60S ribosomal protein L23                                                                                       | 1.18 | NA     | NA      | 2  | 12.9 |
| P08134 | Rho-related GTP-binding protein RhoC                                                                            | 1.18 | 0.204  | 4.6E-01 | 4  | 17.6 |
| P54709 | Sodium/potassium-transporting ATPase subunit beta-3                                                             | 1.17 | 0.084  | 2.4E-01 | 5  | 24.0 |
| P60866 | 40S ribosomal protein S20                                                                                       | 1.16 | NA     | NA      | 2  | 19.3 |
| P42765 | 3-ketoacyl-CoA thiolase, mitochondrial                                                                          | 1.16 | NA     | NA      | 2  | 4.5  |
| P61978 | Heterogeneous nuclear ribonucleoprotein K                                                                       | 1.16 | 0.307  | 4.2E-01 | 12 | 28.1 |
| P61026 | Ras-related protein Rab-10                                                                                      | 1.15 | 0.087  | 2.1E-01 | 3  | 15.0 |
| P46781 | 40S ribosomal protein S9                                                                                        | 1.15 | 2.251  | 6.7E-01 | 3  | 11.3 |
| P62280 | 40S ribosomal protein S11                                                                                       | 1.14 | 0.237  | 5.9E-01 | 3  | 21.5 |
| P62906 | 60S ribosomal protein L10a                                                                                      | 1.14 | 0.130  | 2.5E-01 | 4  | 22.1 |
| P04843 | Dolichyl-diphosphooligosaccharide--protein glycosyltransferase subunit 1                                        | 1.13 | 0.118  | 2.4E-01 | 8  | 14.8 |
| P01903 | HLA class II histocompatibility antigen, DR alpha chain                                                         | 1.13 | 0.293  | 4.4E-01 | 4  | 21.3 |
| O75964 | ATP synthase subunit g, mitochondrial                                                                           | 1.13 | NA     | NA      | 2  | 27.2 |
| Q96QK1 | Vacuolar protein sorting-associated protein 35                                                                  | 1.13 | NA     | NA      | 2  | 2.6  |
| P11413 | Glucose-6-phosphate 1-dehydrogenase                                                                             | 1.13 | 0.772  | 8.3E-01 | 3  | 7.2  |
| P62249 | 40S ribosomal protein S16                                                                                       | 1.12 | 0.024  | 9.0E-02 | 5  | 34.2 |
| P02749 | Beta-2-glycoprotein 1                                                                                           | 1.12 | 0.253  | 2.5E-01 | 8  | 34.8 |
| Q14258 | E3 ubiquitin/ISG15 ligase TRIM25                                                                                | 1.12 | NA     | NA      | 2  | 3.8  |
| P08865 | 40S ribosomal protein SA                                                                                        | 1.11 | 20.731 | 5.3E-01 | 7  | 30.5 |
| P24539 | ATP synthase F(0) complex subunit B1, mitochondrial                                                             | 1.11 | NA     | NA      | 2  | 7.8  |
| P18077 | 60S ribosomal protein L35a                                                                                      | 1.11 | NA     | NA      | 2  | 14.5 |
| P40227 | T-complex protein 1 subunit zeta                                                                                | 1.11 | 0.200  | 5.5E-01 | 4  | 8.1  |
| Q9BV36 | Melanophilin                                                                                                    | 1.11 | NA     | NA      | 2  | 4.8  |
| P25398 | 40S ribosomal protein S12                                                                                       | 1.11 | NA     | NA      | 2  | 13.6 |
| O14980 | Exportin-1                                                                                                      | 1.11 | NA     | NA      | 2  | 2.2  |
| P62701 | 40S ribosomal protein S4, X isoform                                                                             | 1.11 | 1.095  | 7.2E-01 | 3  | 9.1  |
| Q9NV17 | ATPase family AAA domain-containing protein 3A                                                                  | 1.10 | NA     | NA      | 2  | 3.9  |
| P25786 | Proteasome subunit alpha type-1                                                                                 | 1.10 | 2.271  | 7.7E-01 | 4  | 11.8 |
| P11216 | Glycogen phosphorylase, brain form                                                                              | 1.10 | 2.639  | 5.0E-01 | 6  | 8.4  |
| Q86VP6 | Cullin-associated NEDD8-dissociated protein 1                                                                   | 1.10 | NA     | NA      | 2  | 1.5  |
| P17858 | ATP-dependent 6-phosphofructokinase, liver type                                                                 | 1.10 | 0.480  | 4.4E-01 | 4  | 8.7  |
| O60313 | Dynamin-like 120 kDa protein, mitochondrial                                                                     | 1.10 | 1.050  | 8.2E-01 | 4  | 4.8  |
| P17643 | 5,6-dihydroxyindole-2-carboxylic acid oxidase                                                                   | 1.09 | 0.182  | 5.0E-01 | 4  | 8.0  |
| P54652 | Heat shock-related 70 kDa protein 2                                                                             | 1.09 | NA     | NA      | 2  | 3.9  |
| Q9NZ08 | Endoplasmic reticulum aminopeptidase 1                                                                          | 1.09 | NA     | NA      | 2  | 2.2  |
| Q02878 | 60S ribosomal protein L6                                                                                        | 1.08 | 1.047  | 6.1E-01 | 6  | 19.4 |
| O14773 | Tripeptidyl-peptidase 1                                                                                         | 1.08 | 0.076  | 1.9E-01 | 3  | 7.5  |
| O95202 | LETM1 and EF-hand domain-containing protein 1, mitochondrial                                                    | 1.07 | 0.219  | 6.7E-01 | 3  | 5.0  |
| P30101 | Protein disulfide-isomerase A3                                                                                  | 1.07 | 0.190  | 4.4E-01 | 14 | 29.3 |
| P04844 | Dolichyl-diphosphooligosaccharide--protein glycosyltransferase subunit 2                                        | 1.07 | NA     | NA      | 2  | 4.1  |
| Q02218 | 2-oxoglutarate dehydrogenase, mitochondrial                                                                     | 1.07 | 0.126  | 7.6E-01 | 10 | 12.0 |
| P25705 | ATP synthase subunit alpha, mitochondrial                                                                       | 1.07 | 0.142  | 4.3E-01 | 14 | 29.5 |
| P38646 | Stress-70 protein, mitochondrial                                                                                | 1.06 | 0.582  | 6.1E-01 | 12 | 22.5 |
| Q9UBQ0 | Vacuolar protein sorting-associated protein 29                                                                  | 1.06 | NA     | NA      | 2  | 12.1 |
| Q99536 | Synaptic vesicle membrane protein VAT-1 homolog                                                                 | 1.06 | 0.127  | 7.4E-01 | 10 | 32.6 |
| P09382 | Galectin-1                                                                                                      | 1.06 | 0.853  | 5.7E-01 | 5  | 43.7 |
| P01011 | Alpha-1-antichymotrypsin                                                                                        | 1.05 | 0.188  | 5.4E-01 | 9  | 22.2 |
| P42704 | Leucine-rich PPR motif-containing protein, mitochondrial                                                        | 1.05 | 4.782  | 9.4E-01 | 5  | 4.0  |
| Q16401 | 26S proteasome non-ATPase regulatory subunit 5                                                                  | 1.05 | NA     | NA      | 2  | 5.6  |
| P00338 | L-lactate dehydrogenase A chain                                                                                 | 1.04 | 0.417  | 7.3E-01 | 4  | 10.8 |
| P61247 | 40S ribosomal protein S3a                                                                                       | 1.04 | 0.664  | 7.4E-01 | 5  | 22.3 |
| P13667 | Protein disulfide-isomerase A4                                                                                  | 1.04 | 0.364  | 8.4E-01 | 5  | 8.4  |
| P48444 | Coatomer subunit delta                                                                                          | 1.04 | NA     | NA      | 2  | 4.1  |
| P23246 | Splicing factor, proline- and glutamine-rich                                                                    | 1.03 | 1.587  | 7.9E-01 | 6  | 10.2 |
| P48643 | T-complex protein 1 subunit epsilon                                                                             | 1.03 | 0.930  | 7.2E-01 | 5  | 9.4  |
| P10515 | Dihydrolipoylysine-residue acetyltransferase component of pyruvate dehydrogenase complex, mitochondrial         | 1.03 | 0.546  | 9.5E-01 | 4  | 7.0  |
| P40926 | Malate dehydrogenase, mitochondrial                                                                             | 1.03 | 0.879  | 7.7E-01 | 7  | 22.2 |
| P11940 | Polyadenylate-binding protein 1                                                                                 | 1.02 | 6.560  | 9.3E-01 | 6  | 11.8 |
| P12111 | Collagen alpha-3(VI) chain                                                                                      | 1.02 | 0.916  | 5.8E-01 | 48 | 18.0 |
| P07384 | Calpain-1 catalytic subunit                                                                                     | 1.02 | 0.162  | 7.9E-01 | 3  | 5.5  |
| P49368 | T-complex protein 1 subunit gamma                                                                               | 1.02 | 2.531  | 8.3E-01 | 7  | 16.1 |
| Q9HDC9 | Adipocyte plasma membrane-associated protein                                                                    | 1.02 | NA     | NA      | 2  | 5.0  |
| P49257 | Protein ERGIC-53                                                                                                | 1.01 | 0.323  | 8.3E-01 | 5  | 13.3 |
| P29692 | Elongation factor 1-delta                                                                                       | 1.01 | NA     | NA      | 2  | 6.4  |
| Q99798 | Aconitate hydratase, mitochondrial                                                                              | 1.01 | 7.893  | 8.8E-01 | 5  | 8.2  |
| P24752 | Acetyl-CoA acetyltransferase, mitochondrial                                                                     | 1.01 | 2.630  | 9.9E-01 | 5  | 11.5 |
| P38159 | RNA-binding motif protein, X chromosome                                                                         | 1.00 | 0.093  | 1.0E+00 | 3  | 7.4  |
| P78371 | T-complex protein 1 subunit beta                                                                                | 0.99 | 0.482  | 9.8E-01 | 5  | 12.7 |
| P18669 | Phosphoglycerate mutase 1                                                                                       | 0.99 | NA     | NA      | 2  | 15.4 |
| Q9P2R3 | Ankyrin repeat and FYVE domain-containing protein 1                                                             | 0.99 | NA     | NA      | 2  | 2.8  |
| O95292 | Vesicle-associated membrane protein-associated protein B/C                                                      | 0.99 | NA     | NA      | 2  | 13.6 |
| Q5JPE7 | Nodal modulator 2                                                                                               | 0.99 | NA     | NA      | 2  | 2.2  |
| P30086 | Phosphatidylethanolamine-binding protein 1                                                                      | 0.99 | 0.357  | 8.8E-01 | 6  | 31.0 |
| P30040 | Endoplasmic reticulum resident protein 29                                                                       | 0.98 | NA     | NA      | 2  | 8.4  |
| P51991 | Heterogeneous nuclear ribonucleoprotein A3                                                                      | 0.98 | 0.684  | 8.1E-01 | 6  | 19.6 |
| Q9NZM1 | Myoferlin                                                                                                       | 0.98 | 0.388  | 8.5E-01 | 9  | 4.9  |
| P49207 | 60S ribosomal protein L34                                                                                       | 0.97 | NA     | NA      | 2  | 12.8 |
| P01008 | Antithrombin-III                                                                                                | 0.97 | 0.507  | 8.7E-01 | 10 | 23.3 |
| P07195 | L-lactate dehydrogenase B chain                                                                                 | 0.97 | NA     | NA      | 2  | 6.6  |
| P46777 | 60S ribosomal protein L5                                                                                        | 0.97 | 0.577  | 8.5E-01 | 4  | 16.8 |
| P02788 | Lactotransferrin                                                                                                | 0.97 | NA     | NA      | 2  | 3.8  |
| Q15084 | Protein disulfide-isomerase A6                                                                                  | 0.97 | 0.101  | 6.6E-01 | 6  | 16.6 |
| Q9UHQ9 | NADH-cytochrome b5 reductase 1                                                                                  | 0.97 | 0.403  | 7.3E-01 | 4  | 15.1 |
| Q7L576 | Cytoplasmic FMR1-interacting protein 1                                                                          | 0.97 | NA     | NA      | 2  | 2.0  |
| O75643 | U5 small nuclear ribonucleoprotein 200 kDa helicase                                                             | 0.97 | NA     | NA      | 2  | 1.0  |
| P49591 | Serine--tRNA ligase, cytoplasmic                                                                                | 0.96 | 1.346  | 8.4E-01 | 4  | 8.6  |
| P12109 | Collagen alpha-1(VI) chain                                                                                      | 0.96 | 0.704  | 7.0E-01 | 14 | 17.0 |
| O43760 | Synaptogyrin-2                                                                                                  | 0.96 | NA     | NA      | 2  | 8.9  |
| Q9Y2Q3 | Glutathione S-transferase kappa 1                                                                               | 0.96 | 1.810  | 7.2E-01 | 3  | 15.5 |
| O75396 | Vesicle-trafficking protein SEC22b                                                                              | 0.95 | 0.477  | 8.7E-01 | 3  | 18.1 |
| P28331 | NADH-ubiquinone oxidoreductase 75 kDa subunit, mitochondrial                                                    | 0.95 | NA     | NA      | 2  | 5.1  |
| Q94979 | Protein transport protein Sec31A                                                                                | 0.95 | NA     | NA      | 2  | 2.1  |
| Q06323 | Proteasome activator complex subunit 1                                                                          | 0.95 | 1.494  | 8.4E-01 | 4  | 17.3 |
| P36957 | Dihydrolipoylysine-residue succinyltransferase component of 2-oxoglutarate dehydrogenase complex, mitochondrial | 0.95 | 0.151  | 7.7E-01 | 5  | 12.8 |
| P62269 | 40S ribosomal protein S18                                                                                       | 0.95 | 0.118  | 5.5E-01 | 4  | 17.8 |
| P52907 | F-actin-capping protein subunit alpha-1                                                                         | 0.95 | NA     | NA      | 2  | 13.3 |
| P42025 | Beta-centractin                                                                                                 | 0.95 | NA     | NA      | 2  | 5.1  |
| P62913 | 60S ribosomal protein L11                                                                                       | 0.94 | 1.314  | 9.1E-01 | 3  | 16.9 |
| P55209 | Nucleosome assembly protein 1-like 1                                                                            | 0.94 | NA     | NA      | 2  | 7.7  |
| P05387 | 60S acidic ribosomal protein P2                                                                                 | 0.94 | 1.105  | 9.3E-01 | 3  | 25.2 |
| P50991 | T-complex protein 1 subunit delta                                                                               | 0.94 | 0.971  | 6.6E-01 | 5  | 11.3 |
| P05198 | Eukaryotic translation initiation factor 2 subunit 1                                                            | 0.94 | NA     | NA      | 2  | 7.0  |
| Q9Y4L1 | Hypoxia up-regulated protein 1                                                                                  | 0.93 | 0.508  | 6.6E-01 | 6  | 6.4  |
| P36542 | ATP synthase subunit gamma, mitochondrial                                                                       | 0.93 | NA     | NA      | 2  | 7.0  |
| P50990 | T-complex protein 1 subunit theta                                                                               | 0.92 | 0.098  | 2.0E-01 | 8  | 13.7 |

Table S3-Sample UM24

|        |                                                                             |      |       |         |    |      |
|--------|-----------------------------------------------------------------------------|------|-------|---------|----|------|
| Q9NSE4 | Isoleucine--tRNA ligase, mitochondrial                                      | 0.92 | NA    | NA      | 2  | 3.1  |
| P0DME0 | Protein SETSIP                                                              | 0.92 | 1.362 | 7.6E-01 | 3  | 14.9 |
| P49189 | 4-trimethylaminobutyraldehyde dehydrogenase                                 | 0.92 | NA    | NA      | 2  | 4.7  |
| P48047 | ATP synthase subunit O, mitochondrial                                       | 0.91 | 0.163 | 5.8E-01 | 4  | 26.3 |
| P13073 | Cytochrome c oxidase subunit 4 isoform 1, mitochondrial                     | 0.91 | 1.742 | 6.2E-01 | 3  | 20.1 |
| Q14254 | Flotillin-2                                                                 | 0.91 | 0.358 | 8.5E-01 | 5  | 10.5 |
| P12110 | Collagen alpha-2(VI) chain                                                  | 0.91 | 0.166 | 2.0E-01 | 11 | 13.2 |
| P07358 | Complement component C8 beta chain                                          | 0.91 | 1.690 | 8.4E-01 | 3  | 5.2  |
| P36578 | 60S ribosomal protein L4                                                    | 0.91 | 0.040 | 1.3E-01 | 5  | 12.6 |
| Q00610 | Claithrin heavy chain 1                                                     | 0.90 | 0.324 | 1.5E-01 | 31 | 21.3 |
| P99999 | Cytochrome c                                                                | 0.90 | NA    | NA      | 2  | 18.1 |
| P26038 | Moesin                                                                      | 0.89 | 0.187 | 5.6E-01 | 6  | 9.9  |
| P62263 | 40S ribosomal protein S14                                                   | 0.89 | 0.365 | 6.5E-01 | 3  | 29.8 |
| P30049 | ATP synthase subunit delta, mitochondrial                                   | 0.89 | NA    | NA      | 2  | 13.7 |
| P04792 | Heat shock protein beta-1                                                   | 0.89 | 0.472 | 2.7E-01 | 9  | 51.2 |
| Q9UGP8 | Translocation protein SEC63 homolog                                         | 0.89 | NA    | NA      | 2  | 3.2  |
| Q99832 | T-complex protein 1 subunit eta                                             | 0.88 | 0.103 | 4.0E-01 | 4  | 9.6  |
| O75947 | ATP synthase subunit d, mitochondrial                                       | 0.88 | 2.495 | 7.8E-01 | 4  | 22.4 |
| Q14956 | Transmembrane glycoprotein NMB                                              | 0.87 | 0.852 | 7.3E-01 | 3  | 6.5  |
| Q9Y277 | Voltage-dependent anion-selective channel protein 3                         | 0.87 | 0.217 | 3.1E-01 | 4  | 12.4 |
| P55884 | Eukaryotic translation initiation factor 3 subunit B                        | 0.87 | NA    | NA      | 2  | 3.1  |
| Q9P2E9 | Ribosome-binding protein 1                                                  | 0.86 | 0.135 | 1.8E-01 | 5  | 4.6  |
| Q9UB54 | DnaJ homolog subfamily B member 11                                          | 0.86 | NA    | NA      | 2  | 7.5  |
| O75489 | NADH dehydrogenase [ubiquinone] iron-sulfur protein 3, mitochondrial        | 0.86 | 0.031 | 4.0E-02 | 3  | 9.5  |
| P62753 | 40S ribosomal protein S6                                                    | 0.85 | 0.146 | 3.7E-01 | 4  | 16.5 |
| P47756 | F-actin-capping protein subunit beta                                        | 0.85 | 0.171 | 1.8E-01 | 3  | 11.6 |
| Q14165 | Malectin                                                                    | 0.85 | NA    | NA      | 2  | 5.5  |
| P09622 | Dihydropolyl dehydrogenase, mitochondrial                                   | 0.85 | 2.279 | 7.0E-01 | 4  | 9.2  |
| P27797 | Calreticulin                                                                | 0.84 | 0.720 | 5.2E-01 | 5  | 12.2 |
| P00450 | Ceruloplasmin                                                               | 0.84 | 0.185 | 1.9E-01 | 11 | 14.3 |
| Q10567 | AP-1 complex subunit beta-1                                                 | 0.84 | 0.141 | 2.1E-01 | 4  | 3.1  |
| Q07065 | Cytoskeleton-associated protein 4                                           | 0.84 | 0.176 | 1.3E-01 | 4  | 8.8  |
| Q13011 | Delta(3,5)-Delta(2,4)-dienoyl-CoA isomerase, mitochondrial                  | 0.84 | 1.481 | 7.6E-01 | 3  | 9.5  |
| P51608 | Methyl-CpG-binding protein 2                                                | 0.84 | NA    | NA      | 2  | 5.1  |
| P15880 | 40S ribosomal protein S2                                                    | 0.83 | 0.096 | 1.6E-01 | 3  | 13.7 |
| Q9Y4F1 | FERM, RhoGEF and pleckstrin domain-containing protein 1                     | 0.83 | NA    | NA      | 2  | 2.6  |
| P27635 | 60S ribosomal protein L10                                                   | 0.83 | 0.703 | 4.7E-01 | 3  | 15.0 |
| P14314 | Glucosidase 2 subunit beta                                                  | 0.82 | 0.094 | 7.7E-02 | 6  | 10.0 |
| P06753 | Tropomyosin alpha-3 chain                                                   | 0.82 | 0.196 | 3.1E-01 | 3  | 12.6 |
| P60709 | Actin, cytoplasmic 1                                                        | 0.81 | 0.151 | 2.0E-02 | 7  | 26.1 |
| Q92499 | ATP-dependent RNA helicase DDX1                                             | 0.81 | NA    | NA      | 2  | 4.1  |
| P06703 | Protein S100-A6                                                             | 0.81 | NA    | NA      | 2  | 16.7 |
| P08133 | Annexin A6                                                                  | 0.81 | 0.105 | 6.2E-04 | 34 | 56.2 |
| P08107 | Heat shock 70 kDa protein 1A/1B                                             | 0.81 | 0.212 | 3.2E-01 | 8  | 11.5 |
| Q7KZF4 | Staphylococcal nuclease domain-containing protein 1                         | 0.81 | 0.023 | 2.5E-02 | 3  | 3.7  |
| P24534 | Elongation factor 1-beta                                                    | 0.81 | 0.394 | 4.8E-01 | 3  | 13.8 |
| Q99714 | 3-hydroxyacyl-CoA dehydrogenase type-2                                      | 0.80 | NA    | NA      | 2  | 7.7  |
| O95782 | AP-2 complex subunit alpha-1                                                | 0.79 | NA    | NA      | 2  | 3.7  |
| Q14203 | Dynactin subunit 1                                                          | 0.78 | NA    | NA      | 2  | 2.3  |
| Q07954 | Prolow-density lipoprotein receptor-related protein 1                       | 0.78 | 0.077 | 3.5E-02 | 5  | 1.7  |
| P04632 | Calpain small subunit 1                                                     | 0.78 | 0.226 | 2.2E-01 | 3  | 11.2 |
| Q14103 | Heterogeneous nuclear ribonucleoprotein D0                                  | 0.77 | NA    | NA      | 2  | 9.3  |
| P38117 | Electron transfer flavoprotein subunit beta                                 | 0.77 | NA    | NA      | 2  | 11.4 |
| P18615 | Sarcoplasmic/endoplasmic reticulum calcium ATPase 2                         | 0.77 | 0.163 | 6.1E-02 | 7  | 8.1  |
| P48735 | Isocitrate dehydrogenase [NADP], mitochondrial                              | 0.77 | 0.086 | 4.7E-02 | 6  | 15.3 |
| Q07666 | KH domain-containing, RNA-binding, signal transduction-associated protein 1 | 0.77 | 0.200 | 2.4E-01 | 4  | 7.9  |
| Q15165 | Serum paraoxonase/arylesterase 2                                            | 0.76 | NA    | NA      | 2  | 7.9  |
| P16157 | Ankyrin-1                                                                   | 0.76 | 0.149 | 7.9E-02 | 4  | 3.1  |
| Q15293 | Reticulocalbin-1                                                            | 0.76 | 0.436 | 5.4E-01 | 4  | 13.0 |
| Q12797 | Aspartyl/asparaginyl beta-hydroxylase                                       | 0.76 | 0.105 | 1.0E-01 | 5  | 4.7  |
| P35579 | Myosin-9                                                                    | 0.76 | 0.052 | 4.4E-06 | 69 | 34.9 |
| Q96CW1 | AP-2 complex subunit mu                                                     | 0.75 | 0.225 | 6.3E-01 | 3  | 9.4  |
| Q14204 | Cytoplasmic dynein 1 heavy chain 1                                          | 0.75 | 0.082 | 4.2E-03 | 24 | 6.4  |
| Q15149 | Plectin                                                                     | 0.75 | 0.072 | 1.5E-03 | 45 | 10.9 |
| P20700 | Lamin-B1                                                                    | 0.75 | 0.262 | 1.7E-01 | 5  | 8.2  |
| P02649 | Apolipoprotein E                                                            | 0.75 | 0.124 | 1.3E-02 | 15 | 49.2 |
| P08571 | Monocyte differentiation antigen CD14                                       | 0.74 | 0.214 | 1.9E-01 | 3  | 7.5  |
| P07437 | Tubulin beta chain                                                          | 0.74 | 0.131 | 8.5E-02 | 4  | 16.0 |
| P16403 | Histone H1.2                                                                | 0.74 | 0.149 | 2.5E-01 | 4  | 15.5 |
| P09429 | High mobility group protein B1                                              | 0.74 | 0.055 | 8.2E-02 | 3  | 17.2 |
| P15311 | Ezrin                                                                       | 0.74 | 0.081 | 2.0E-01 | 3  | 4.9  |
| P02549 | Spectrin alpha chain, erythrocytic 1                                        | 0.74 | 0.108 | 1.0E-02 | 11 | 5.7  |
| P15144 | Aminopeptidase N                                                            | 0.73 | 0.440 | 8.2E-01 | 3  | 4.2  |
| P27105 | Erythrocyte band 7 integral membrane protein                                | 0.73 | 0.192 | 1.2E-01 | 5  | 21.2 |
| P09543 | 2',3'-cyclic-nucleotide 3'-phosphodiesterase                                | 0.73 | 0.479 | 3.8E-01 | 5  | 11.2 |
| Q07021 | Complement component 1 Q subcomponent-binding protein, mitochondrial        | 0.72 | NA    | NA      | 2  | 11.0 |
| P17931 | Galectin-3                                                                  | 0.72 | 0.110 | 5.6E-03 | 6  | 28.4 |
| Q14980 | Nuclear mitotic apparatus protein 1                                         | 0.72 | 3.126 | 5.2E-01 | 3  | 2.2  |
| P62851 | 40S ribosomal protein S25                                                   | 0.72 | 0.123 | 4.7E-02 | 3  | 16.0 |
| Q9NVA2 | Septin-11                                                                   | 0.72 | 0.400 | 2.5E-01 | 3  | 7.2  |
| Q14764 | Major vault protein                                                         | 0.71 | 0.330 | 2.8E-01 | 5  | 6.5  |
| P39019 | 40S ribosomal protein S19                                                   | 0.71 | 0.157 | 1.0E-01 | 3  | 18.6 |
| P09936 | Ubiquitin carboxyl-terminal hydrolase isozyme L1                            | 0.71 | NA    | NA      | 2  | 11.7 |
| P55072 | Transitional endoplasmic reticulum ATPase                                   | 0.71 | 0.150 | 7.2E-02 | 10 | 13.4 |
| P02730 | Band 3 anion transport protein                                              | 0.70 | 0.097 | 1.9E-02 | 11 | 16.9 |
| P04179 | Superoxide dismutase [Mn], mitochondrial                                    | 0.70 | 0.142 | 1.2E-01 | 5  | 17.1 |
| Q75131 | Copine-3                                                                    | 0.70 | 0.088 | 1.2E-02 | 3  | 6.3  |
| Q53GQ0 | Estradiol 17-beta-dehydrogenase 12                                          | 0.69 | 0.448 | 4.6E-01 | 3  | 12.5 |
| P32119 | Peroxioredoxin-2                                                            | 0.69 | 0.141 | 3.5E-02 | 4  | 18.2 |
| P50914 | 60S ribosomal protein L14                                                   | 0.69 | NA    | NA      | 2  | 10.2 |
| P11277 | Spectrin beta chain, erythrocytic                                           | 0.69 | 0.151 | 4.3E-03 | 16 | 11.6 |
| P06396 | Gelsolin                                                                    | 0.69 | 0.076 | 7.8E-04 | 12 | 18.4 |
| P00740 | Coagulation factor IX                                                       | 0.69 | NA    | NA      | 2  | 3.3  |
| P30048 | Thioredoxin-dependent peroxide reductase, mitochondrial                     | 0.68 | 0.257 | 1.0E-01 | 3  | 14.1 |
| Q9NY15 | Stabilin-1                                                                  | 0.68 | NA    | NA      | 2  | 1.3  |
| O15173 | Membrane-associated progesterone receptor component 2                       | 0.67 | 0.092 | 4.5E-02 | 4  | 22.0 |
| P00367 | Glutamate dehydrogenase 1, mitochondrial                                    | 0.67 | 0.170 | 5.9E-02 | 5  | 9.9  |
| Q727G0 | Target of Nesh-SH3                                                          | 0.67 | NA    | NA      | 2  | 3.2  |
| Q99584 | Protein S100-A13                                                            | 0.67 | 0.095 | 2.2E-02 | 4  | 41.8 |
| Q9UB16 | Guanine nucleotide-binding protein G(I)/G(S)/G(O) subunit gamma-12          | 0.66 | NA    | NA      | 2  | 41.7 |
| P62277 | 40S ribosomal protein S13                                                   | 0.66 | 0.404 | 3.4E-01 | 3  | 17.9 |
| P05362 | Intercellular adhesion molecule 1                                           | 0.65 | NA    | NA      | 2  | 5.3  |
| P30042 | ES1 protein homolog, mitochondrial                                          | 0.65 | NA    | NA      | 2  | 9.3  |
| Q9BS40 | Latexin                                                                     | 0.64 | NA    | NA      | 2  | 12.2 |
| P62424 | 60S ribosomal protein L7a                                                   | 0.64 | NA    | NA      | 2  | 6.4  |
| Q15019 | Septin-2                                                                    | 0.64 | 0.087 | 3.1E-02 | 5  | 18.6 |
| O60504 | Vinexin                                                                     | 0.64 | NA    | NA      | 2  | 5.2  |

Table S3-Sample UM24

|        |                                                                      |      |       |         |    |      |
|--------|----------------------------------------------------------------------|------|-------|---------|----|------|
| Q99460 | 26S proteasome non-ATPase regulatory subunit 1                       | 0.63 | NA    | NA      | 2  | 2.7  |
| Q9NVD7 | Alpha-parvin                                                         | 0.63 | 0.231 | 2.0E-01 | 3  | 9.4  |
| Q9P0L0 | Vesicle-associated membrane protein-associated protein A             | 0.63 | NA    | NA      | 2  | 10.0 |
| Q96D15 | Reticulocalbin-3                                                     | 0.63 | NA    | NA      | 2  | 8.8  |
| O00468 | Agrin                                                                | 0.63 | 0.118 | 3.1E-02 | 6  | 4.4  |
| P50502 | Hsc70-interacting protein                                            | 0.62 | 0.289 | 2.2E-01 | 3  | 7.9  |
| Q9NQC3 | Reticulon-4                                                          | 0.62 | 0.178 | 1.4E-01 | 3  | 2.7  |
| P29590 | Protein PML                                                          | 0.61 | NA    | NA      | 2  | 3.3  |
| Q9NZN4 | EH domain-containing protein 2                                       | 0.61 | NA    | NA      | 2  | 5.2  |
| O43865 | Putative adenosylhomocysteinase 2                                    | 0.61 | NA    | NA      | 2  | 3.6  |
| P35580 | Myosin-10                                                            | 0.61 | 0.093 | 6.0E-03 | 12 | 8.0  |
| P13861 | cAMP-dependent protein kinase type II-alpha regulatory subunit       | 0.61 | 0.152 | 2.2E-01 | 3  | 11.4 |
| O95831 | Apoptosis-inducing factor 1, mitochondrial                           | 0.60 | NA    | NA      | 2  | 5.2  |
| P60033 | CD81 antigen                                                         | 0.60 | NA    | NA      | 2  | 11.9 |
| Q16181 | Septin-7                                                             | 0.60 | 0.067 | 3.6E-03 | 6  | 16.2 |
| P08572 | Collagen alpha-2(IV) chain                                           | 0.60 | 0.134 | 6.9E-03 | 8  | 5.8  |
| P62917 | 60S ribosomal protein L8                                             | 0.60 | 0.251 | 1.5E-01 | 3  | 13.2 |
| P50402 | Emerin                                                               | 0.60 | NA    | NA      | 2  | 9.8  |
| Q13418 | Integrin-linked protein kinase                                       | 0.60 | NA    | NA      | 2  | 5.3  |
| P67936 | Tropomyosin alpha-4 chain                                            | 0.60 | 0.205 | 1.7E-02 | 8  | 27.4 |
| P40429 | 60S ribosomal protein L13a                                           | 0.60 | NA    | NA      | 2  | 9.9  |
| P00738 | Haptoglobin                                                          | 0.59 | 0.168 | 7.4E-02 | 6  | 18.5 |
| Q8WUJ4 | Programmed cell death 6-interacting protein                          | 0.59 | 0.346 | 2.3E-01 | 3  | 3.2  |
| P84103 | Serine/arginine-rich splicing factor 3                               | 0.59 | NA    | NA      | 2  | 14.0 |
| P11166 | Solute carrier family 2, facilitated glucose transporter member 1    | 0.59 | 0.092 | 7.2E-03 | 3  | 7.1  |
| P11047 | Laminin subunit gamma-1                                              | 0.58 | 0.110 | 1.2E-03 | 16 | 10.4 |
| Q9BZZ2 | Sialoadhesin                                                         | 0.58 | NA    | NA      | 2  | 1.3  |
| P26373 | 60S ribosomal protein L13                                            | 0.57 | 0.336 | 3.6E-01 | 3  | 15.2 |
| P07942 | Laminin subunit beta-1                                               | 0.57 | 0.200 | 3.0E-02 | 4  | 3.1  |
| Q71U36 | Tubulin alpha-1A chain                                               | 0.56 | 0.234 | 2.9E-02 | 4  | 13.1 |
| P62244 | 40S ribosomal protein S15a                                           | 0.56 | NA    | NA      | 2  | 13.1 |
| P05556 | Integrin beta-1                                                      | 0.56 | 0.148 | 1.7E-02 | 5  | 7.5  |
| P02462 | Collagen alpha-1(IV) chain                                           | 0.56 | 0.293 | 5.7E-02 | 4  | 3.3  |
| P68371 | Tubulin beta-4B chain                                                | 0.56 | 0.128 | 3.8E-03 | 3  | 9.9  |
| Q9UHG3 | Prenylcysteine oxidase 1                                             | 0.56 | NA    | NA      | 2  | 4.4  |
| P08670 | Vimentin                                                             | 0.55 | 0.039 | 5.3E-15 | 27 | 55.4 |
| P39060 | Collagen alpha-1(XVIII) chain                                        | 0.55 | 0.124 | 8.2E-05 | 8  | 5.5  |
| P09619 | Platelet-derived growth factor receptor beta                         | 0.55 | NA    | NA      | 2  | 2.9  |
| O15230 | Laminin subunit alpha-5                                              | 0.55 | 0.101 | 8.6E-05 | 16 | 5.9  |
| P42167 | Lamina-associated polypeptide 2, isoforms beta/gamma                 | 0.55 | 0.307 | 1.2E-01 | 4  | 10.1 |
| P60660 | Myosin light polypeptide 6                                           | 0.55 | 0.040 | 1.4E-04 | 9  | 58.3 |
| Q9UHD8 | Septin-9                                                             | 0.55 | 0.221 | 3.8E-01 | 4  | 8.9  |
| O75915 | PRA1 family protein 3                                                | 0.55 | 0.399 | 2.7E-01 | 3  | 19.7 |
| P04083 | Annexin A1                                                           | 0.55 | 0.036 | 7.4E-04 | 14 | 46.0 |
| Q08722 | Leukocyte surface antigen CD47                                       | 0.54 | NA    | NA      | 2  | 5.9  |
| P61604 | 10 kDa heat shock protein, mitochondrial                             | 0.54 | 0.110 | 5.3E-02 | 3  | 29.4 |
| P22413 | Ectonucleotide pyrophosphatase/phosphodiesterase family member 1     | 0.54 | NA    | NA      | 2  | 2.7  |
| Q08431 | Lactadherin                                                          | 0.53 | NA    | NA      | 2  | 7.5  |
| Q13509 | Tubulin beta-3 chain                                                 | 0.53 | 0.072 | 6.3E-03 | 3  | 8.9  |
| P05023 | Sodium/potassium-transporting ATPase subunit alpha-1                 | 0.53 | 0.075 | 2.7E-04 | 11 | 12.4 |
| Q9Y2J2 | Band 4, 1-like protein 3                                             | 0.53 | NA    | NA      | 2  | 3.3  |
| Q6DD88 | Atlastin-3                                                           | 0.53 | 0.191 | 2.9E-02 | 4  | 7.2  |
| Q06830 | Peroxioredoxin-1                                                     | 0.53 | 0.094 | 1.5E-05 | 6  | 32.2 |
| P23634 | Plasma membrane calcium-transporting ATPase 4                        | 0.53 | NA    | NA      | 2  | 2.8  |
| P20073 | Annexin A7                                                           | 0.52 | 0.088 | 3.9E-02 | 4  | 11.7 |
| P13671 | Complement component C6                                              | 0.52 | 0.277 | 1.9E-01 | 4  | 6.5  |
| P10606 | Cytochrome c oxidase subunit 5B, mitochondrial                       | 0.52 | 0.205 | 2.2E-02 | 3  | 15.5 |
| P17612 | cAMP-dependent protein kinase catalytic subunit alpha                | 0.52 | 0.068 | 7.1E-02 | 3  | 6.8  |
| O94905 | Erlin-2                                                              | 0.51 | 0.087 | 8.3E-04 | 6  | 16.8 |
| Q9Y490 | Talin-1                                                              | 0.51 | 0.071 | 4.5E-07 | 24 | 12.4 |
| P12814 | Alpha-actinin-1                                                      | 0.50 | 0.131 | 2.5E-03 | 10 | 14.3 |
| Q03252 | Lamin-B2                                                             | 0.50 | 0.080 | 3.4E-06 | 15 | 24.2 |
| P02545 | Prelamin-A/C                                                         | 0.50 | 0.028 | 0.0E+00 | 30 | 41.0 |
| P04216 | Thy-1 membrane glycoprotein                                          | 0.50 | 0.194 | 6.6E-02 | 3  | 24.2 |
| P26447 | Protein S100-A4                                                      | 0.49 | 0.138 | 1.8E-02 | 3  | 27.7 |
| Q13561 | Dynactin subunit 2                                                   | 0.48 | NA    | NA      | 2  | 8.2  |
| O60814 | Histone H2B type 1-K                                                 | 0.48 | NA    | NA      | 2  | 7.9  |
| Q9BSJ8 | Extended synaptotagmin-1                                             | 0.48 | 0.408 | 3.0E-01 | 3  | 3.0  |
| Q9P0M6 | Core histone macro-H2A.2                                             | 0.48 | NA    | NA      | 2  | 5.4  |
| Q16363 | Laminin subunit alpha-4                                              | 0.47 | 0.211 | 2.1E-02 | 8  | 4.8  |
| P49411 | Elongation factor Tu, mitochondrial                                  | 0.47 | 0.189 | 3.2E-02 | 5  | 13.3 |
| P35222 | Catenin beta-1                                                       | 0.47 | NA    | NA      | 2  | 4.0  |
| P55268 | Laminin subunit beta-2                                               | 0.47 | 0.085 | 1.1E-07 | 14 | 8.8  |
| P0C0S5 | Histone H2A.Z                                                        | 0.46 | NA    | NA      | 2  | 18.8 |
| P59768 | Guanine nucleotide-binding protein G(I)/G(S)/G(O) subunit gamma-2    | 0.46 | NA    | NA      | 2  | 42.3 |
| P98160 | Basement membrane-specific heparan sulfate proteoglycan core protein | 0.45 | 0.045 | 9.4E-12 | 33 | 10.1 |
| Q12805 | EGF-containing fibulin-like extracellular matrix protein 1           | 0.45 | NA    | NA      | 2  | 3.9  |
| Q8WXH0 | Nesprin-2                                                            | 0.45 | NA    | NA      | 2  | 0.3  |
| P08294 | Extracellular superoxide dismutase [Cu-Zn]                           | 0.45 | NA    | NA      | 2  | 12.1 |
| Q9BT22 | Chitobiosyldiphosphodolichol beta-mannosyltransferase                | 0.44 | NA    | NA      | 2  | 3.9  |
| O60716 | Catenin delta-1                                                      | 0.44 | NA    | NA      | 2  | 2.3  |
| P35611 | Alpha-adducin                                                        | 0.44 | NA    | NA      | 2  | 6.0  |
| P07357 | Complement component C8 alpha chain                                  | 0.44 | NA    | NA      | 2  | 7.0  |
| P26583 | High mobility group protein B2                                       | 0.44 | NA    | NA      | 2  | 12.9 |
| O75369 | Filamin-B                                                            | 0.43 | 0.174 | 6.9E-02 | 7  | 3.3  |
| Q93052 | Lipoma-preferred partner                                             | 0.43 | NA    | NA      | 2  | 4.2  |
| P00352 | Retinal dehydrogenase 1                                              | 0.43 | NA    | NA      | 2  | 2.0  |
| P05091 | Aldehyde dehydrogenase, mitochondrial                                | 0.43 | NA    | NA      | 2  | 4.3  |
| P07360 | Complement component C8 gamma chain                                  | 0.43 | 0.199 | 5.9E-02 | 3  | 23.3 |
| O14786 | Neuropilin-1                                                         | 0.42 | NA    | NA      | 2  | 3.1  |
| P43121 | Cell surface glycoprotein MUC18                                      | 0.41 | NA    | NA      | 2  | 3.4  |
| P23142 | Fibulin-1                                                            | 0.41 | NA    | NA      | 2  | 3.3  |
| Q9Y240 | C-type lectin domain family 11 member A                              | 0.40 | NA    | NA      | 2  | 7.7  |
| Q14118 | Dystroglycan                                                         | 0.40 | NA    | NA      | 2  | 2.5  |
| Q14344 | Guanine nucleotide-binding protein subunit alpha-13                  | 0.40 | 0.242 | 2.0E-01 | 3  | 7.7  |
| Q2UY09 | Collagen alpha-1(XXVIII) chain                                       | 0.40 | NA    | NA      | 2  | 1.8  |
| P29966 | Myristoylated alanine-rich C-kinase substrate                        | 0.39 | 0.345 | 4.2E-01 | 3  | 12.3 |
| Q9BTV4 | Transmembrane protein 43                                             | 0.39 | NA    | NA      | 2  | 6.3  |
| P55060 | Exportin-2                                                           | 0.37 | NA    | NA      | 2  | 2.3  |
| Q9Y3I0 | tRNA-splicing ligase RtcB homolog                                    | 0.37 | NA    | NA      | 2  | 4.6  |
| P09493 | Tropomyosin alpha-1 chain                                            | 0.36 | 0.516 | 1.4E-01 | 3  | 8.8  |
| Q96CX2 | BTB/POZ domain-containing protein KCTD12                             | 0.36 | NA    | NA      | 2  | 7.4  |
| O14950 | Myosin regulatory light chain 12B                                    | 0.35 | NA    | NA      | 2  | 12.2 |
| P54289 | Voltage-dependent calcium channel subunit alpha-2/delta-1            | 0.34 | NA    | NA      | 2  | 2.1  |
| O43301 | Heat shock 70 kDa protein 12A                                        | 0.34 | NA    | NA      | 2  | 2.8  |
| Q92522 | Histone H1x                                                          | 0.33 | NA    | NA      | 2  | 11.7 |
| Q96HC4 | PDZ and LIM domain protein 5                                         | 0.32 | NA    | NA      | 2  | 3.5  |

Table S3-Sample UM24

|        |                                                          |      |       |         |    |      |
|--------|----------------------------------------------------------|------|-------|---------|----|------|
| P27816 | Microtubule-associated protein 4                         | 0.29 | NA    | NA      | 2  | 2.0  |
| O94832 | Unconventional myosin-Id                                 | 0.28 | NA    | NA      | 2  | 2.4  |
| Q05682 | Caldesmon                                                | 0.28 | NA    | NA      | 2  | 3.7  |
| P46821 | Microtubule-associated protein 1B                        | 0.27 | 0.487 | 1.5E-01 | 4  | 2.0  |
| P08123 | Collagen alpha-2(I) chain                                | 0.26 | NA    | NA      | 2  | 2.4  |
| Q9UBX5 | Fibulin-5                                                | 0.26 | NA    | NA      | 2  | 5.1  |
| P07305 | Histone H1.0                                             | 0.26 | NA    | NA      | 2  | 9.3  |
| P17661 | Desmin                                                   | 0.25 | NA    | NA      | 2  | 4.0  |
| P58166 | Inhibin beta E chain                                     | 0.25 | NA    | NA      | 2  | 5.7  |
| P22352 | Glutathione peroxidase 3                                 | 0.24 | NA    | NA      | 2  | 8.0  |
| P09497 | Clathrin light chain B                                   | 0.23 | NA    | NA      | 2  | 8.3  |
| P06899 | Histone H2B type 1-J                                     | 0.21 | NA    | NA      | 2  | 7.9  |
| P07197 | Neurofilament medium polypeptide                         | 0.21 | NA    | NA      | 2  | 3.4  |
| Q16853 | Membrane primary amine oxidase                           | 0.21 | NA    | NA      | 2  | 2.6  |
| O94875 | Sorbin and SH3 domain-containing protein 2               | 0.21 | NA    | NA      | 2  | 2.5  |
| P35637 | RNA-binding protein FUS                                  | 0.20 | 0.234 | 1.8E-01 | 3  | 6.1  |
| P43320 | Beta-crystallin B2                                       | 0.17 | NA    | NA      | 2  | 11.7 |
| P10745 | Retinol-binding protein 3                                | 0.14 | NA    | NA      | 2  | 2.1  |
| P24844 | Myosin regulatory light polypeptide 9                    | 0.13 | NA    | NA      | 2  | 12.2 |
| Q14495 | Lipid phosphate phosphohydrolase 3                       | 0.13 | NA    | NA      | 2  | 6.8  |
| Q9BXM0 | Periaxin                                                 | 0.10 | 0.392 | 6.4E-02 | 3  | 1.4  |
| P63211 | Guanine nucleotide-binding protein G(T) subunit gamma-T1 | 0.07 | NA    | NA      | 2  | 17.6 |
| O00159 | Unconventional myosin-1c                                 | 0.44 | 0.091 | 2.0E-03 | 10 | 10.9 |
| Q14112 | Nidogen-2                                                | 0.43 | 0.051 | 8.1E-07 | 8  | 7.1  |
| O00264 | Membrane-associated progesterone receptor component 1    | 0.41 | 0.087 | 6.9E-04 | 4  | 15.9 |
| P02511 | Alpha-crystallin B chain                                 | 0.41 | 0.133 | 9.2E-03 | 4  | 21.7 |
| P07355 | Annexin A2                                               | 0.40 | 0.036 | 0.0E+00 | 22 | 58.7 |
| P04899 | Guanine nucleotide-binding protein G(i) subunit alpha-2  | 0.40 | 0.064 | 3.1E-04 | 5  | 15.5 |
| P14543 | Nidogen-1                                                | 0.39 | 0.056 | 8.6E-06 | 10 | 9.1  |
| P62987 | Ubiquitin-60S ribosomal protein L40                      | 0.39 | 0.081 | 6.4E-09 | 5  | 41.4 |
| P68366 | Tubulin alpha-4A chain                                   | 0.39 | 0.193 | 5.3E-03 | 3  | 8.5  |
| P10643 | Complement component C7                                  | 0.39 | 0.209 | 1.2E-02 | 5  | 7.2  |
| P50895 | Basal cell adhesion molecule                             | 0.38 | 0.136 | 7.6E-04 | 3  | 6.8  |
| P04004 | Vitronectin                                              | 0.38 | 0.124 | 3.6E-06 | 8  | 16.9 |
| P21333 | Filamin-A                                                | 0.38 | 0.043 | 7.5E-14 | 54 | 28.6 |
| P13987 | CD59 glycoprotein                                        | 0.37 | 0.072 | 1.5E-04 | 3  | 25.0 |
| Q8IWA5 | Choline transporter-like protein 2                       | 0.36 | 0.206 | 9.1E-03 | 3  | 4.1  |
| Q16695 | Histone H3.1t                                            | 0.36 | 0.050 | 2.2E-07 | 4  | 17.6 |
| O43707 | Alpha-actinin-4                                          | 0.36 | 0.097 | 2.0E-05 | 11 | 16.0 |
| Q9BXN1 | Asporin                                                  | 0.36 | 0.097 | 1.6E-04 | 3  | 11.3 |
| P00387 | NADH-cytochrome b5 reductase 3                           | 0.35 | 0.114 | 1.6E-03 | 6  | 23.3 |
| P01031 | Complement C5                                            | 0.35 | 0.092 | 2.5E-06 | 10 | 5.7  |
| P62805 | Histone H4                                               | 0.35 | 0.043 | 1.6E-13 | 7  | 52.4 |
| P07099 | Epoxide hydrolase 1                                      | 0.35 | 0.130 | 3.2E-03 | 8  | 20.4 |
| Q9Y6C2 | EMILIN-1                                                 | 0.34 | 0.054 | 1.2E-03 | 7  | 8.8  |
| P36269 | Gamma-glutamyltransferase 5                              | 0.33 | 0.202 | 3.5E-03 | 4  | 8.0  |
| Q05707 | Collagen alpha-1(XIV) chain                              | 0.32 | 0.148 | 1.6E-03 | 10 | 6.1  |
| P39059 | Collagen alpha-1(XV) chain                               | 0.32 | 0.137 | 4.5E-04 | 6  | 5.0  |
| Q6NZI2 | Polymerase I and transcript release factor               | 0.31 | 0.177 | 3.2E-03 | 5  | 18.7 |
| P18206 | Vinculin                                                 | 0.31 | 0.130 | 1.8E-05 | 10 | 11.6 |
| P05186 | Alkaline phosphatase, tissue-nonspecific isozyme         | 0.28 | 0.175 | 3.9E-03 | 4  | 8.8  |
| P10909 | Clusterin                                                | 0.28 | 0.049 | 6.0E-11 | 15 | 33.0 |
| Q01995 | Transgelin                                               | 0.28 | 0.129 | 1.5E-02 | 4  | 23.4 |
| P35555 | Fibrillin-1                                              | 0.27 | 0.040 | 1.1E-12 | 47 | 18.8 |
| P02686 | Myelin basic protein                                     | 0.26 | 0.252 | 5.0E-02 | 3  | 10.5 |
| Q13885 | Tubulin beta-2A chain                                    | 0.26 | 0.092 | 5.6E-05 | 3  | 8.1  |
| P68032 | Actin, alpha cardiac muscle 1                            | 0.26 | 0.203 | 1.6E-04 | 7  | 28.9 |
| P51884 | Lumican                                                  | 0.26 | 0.059 | 6.0E-14 | 12 | 40.8 |
| Q09666 | Neuroblast differentiation-associated protein AHNAK      | 0.25 | 0.106 | 1.2E-05 | 33 | 4.5  |
| P01871 | Ig mu chain C region                                     | 0.25 | 0.105 | 6.7E-06 | 10 | 27.0 |
| P21926 | CD9 antigen                                              | 0.25 | 0.162 | 2.4E-02 | 3  | 9.6  |
| P04275 | von Willebrand factor                                    | 0.24 | 0.121 | 1.9E-06 | 11 | 5.3  |
| Q16555 | Dihydropyrimidinase-related protein 2                    | 0.22 | 0.120 | 4.2E-05 | 9  | 20.8 |
| Q01082 | Spectrin beta chain, non-erythrocytic 1                  | 0.22 | 0.055 | 6.0E-15 | 41 | 19.8 |
| P00167 | Cytochrome b5                                            | 0.22 | 0.162 | 8.0E-03 | 3  | 35.8 |
| Q13813 | Spectrin alpha chain, non-erythrocytic 1                 | 0.22 | 0.069 | 2.9E-15 | 62 | 28.1 |
| O43491 | Band 4, 1-like protein 2                                 | 0.21 | 0.142 | 2.0E-05 | 7  | 8.8  |
| P80723 | Brain acid soluble protein 1                             | 0.21 | 0.096 | 1.8E-04 | 6  | 46.7 |
| P51888 | Prolargin                                                | 0.20 | 0.063 | 3.6E-15 | 10 | 28.8 |
| P35625 | Metalloproteinase inhibitor 3                            | 0.20 | 0.172 | 1.5E-05 | 6  | 30.3 |
| P23946 | Chymase                                                  | 0.20 | 0.249 | 5.4E-03 | 4  | 21.1 |
| P21810 | Biglycan                                                 | 0.20 | 0.072 | 1.5E-10 | 15 | 49.7 |
| P60903 | Protein S100-A10                                         | 0.19 | 0.118 | 5.9E-07 | 4  | 35.1 |
| P07585 | Decorin                                                  | 0.19 | 0.113 | 5.0E-04 | 7  | 21.7 |
| P15088 | Mast cell carboxypeptidase A                             | 0.19 | 0.238 | 3.6E-02 | 5  | 12.0 |
| Q14195 | Dihydropyrimidinase-related protein 3                    | 0.19 | 0.071 | 4.1E-05 | 4  | 10.0 |
| P21980 | Protein-glutamine gamma-glutamyltransferase 2            | 0.18 | 0.092 | 1.4E-13 | 18 | 28.2 |
| P41219 | Peripherin                                               | 0.18 | 0.234 | 1.6E-05 | 12 | 26.8 |
| Q03135 | Caveolin-1                                               | 0.18 | 0.150 | 7.0E-03 | 3  | 13.5 |
| P02760 | Protein AMBP                                             | 0.17 | 0.120 | 1.5E-06 | 4  | 19.0 |
| P35749 | Myosin-11                                                | 0.17 | 0.097 | 2.4E-10 | 34 | 18.9 |
| P02748 | Complement component C9                                  | 0.17 | 0.080 | 2.1E-13 | 12 | 21.8 |
| Q15661 | Tryptase alpha/beta-1                                    | 0.15 | 0.213 | 2.2E-04 | 5  | 21.8 |
| P02743 | Serum amyloid P-component                                | 0.15 | 0.186 | 3.6E-04 | 5  | 20.6 |
| P20774 | Mimecan                                                  | 0.14 | 0.174 | 3.0E-06 | 6  | 16.4 |
| P22748 | Carbonic anhydrase 4                                     | 0.13 | 0.224 | 7.5E-05 | 5  | 14.7 |
| Q02952 | A-kinase anchor protein 12                               | 0.13 | 0.182 | 4.8E-03 | 11 | 9.3  |
| P25189 | Myelin protein P0                                        | 0.11 | 0.225 | 1.6E-05 | 7  | 27.4 |

Brown denotes change  $\geq 2$  standard deviations (SD) from the mean, yellow denotes change  $\geq 1$  SD and green highlights p values  $\leq 0.05$ . NA, not applicable, n<3 unique peptides.
