# Supplementary material for: iTRAQ Quantitative Proteomic Comparison of Metastatic and Non-Metastatic Uveal Melanoma Tumors
Source: PubMed Central journal article supplement (PMC4549237; doi:10.1371/journal.pone.0135543), 2015-08-25
Supplement: pone.0135543.s004.pdf [file pone.0135543.s004.pdf]

**Supplementary Table S4**  
**Relative Protein Abundance: Sample UM28, Metastatic**

Total Proteins Quantified = 948; LogMedian Protein Ratio = .20; LogMean Protein Ratio = 0; Standard Deviation = 0.95

| Uni-Prot Accession | Protein                                                                    | Ratio UM/Control | Standard Deviation | p value | Unique Peptides | % Sequence Coverage |
|--------------------|----------------------------------------------------------------------------|------------------|--------------------|---------|-----------------|---------------------|
| P06454             | Prothymosin alpha                                                          | 13.76            | 0.330              | 1.8E-02 | 3               | 21.6                |
| P62937             | Peptidyl-prolyl cis-trans isomerase A                                      | 9.40             | 0.099              | 0.0E+00 | 7               | 38.2                |
| P23381             | Tryptophan--tRNA ligase, cytoplasmic                                       | 8.28             | 0.168              | 2.5E-07 | 8               | 14.4                |
| P16401             | Histone H1.5                                                               | 7.60             | 0.134              | 1.8E-06 | 7               | 15.9                |
| P05413             | Fatty acid-binding protein, heart                                          | 7.44             | 0.164              | 4.0E-03 | 4               | 28.6                |
| P78417             | Glutathione S-transferase omega-1                                          | 5.99             | 0.144              | 1.3E-09 | 9               | 31.1                |
| P05534             | HLA class I histocompatibility antigen, A-24 alpha chain                   | 5.64             | 0.188              | 4.1E-05 | 5               | 21.4                |
| P00558             | Phosphoglycerate kinase 1                                                  | 5.26             | 0.115              | 1.9E-09 | 14              | 30.0                |
| P19338             | Nucleolin                                                                  | 5.25             | 0.071              | 0.0E+00 | 20              | 25.5                |
| P06748             | Nucleophosmin                                                              | 5.25             | 0.094              | 4.0E-10 | 7               | 25.5                |
| P15531             | Nucleoside diphosphate kinase A                                            | 4.83             | 0.060              | 4.6E-11 | 6               | 43.4                |
| P61088             | Ubiquitin-conjugating enzyme E2 N                                          | 4.80             | 0.208              | 2.3E-03 | 5               | 34.9                |
| P23528             | Cofilin-1                                                                  | 4.71             | 0.103              | 1.3E-07 | 11              | 54.8                |
| P16070             | CD44 antigen                                                               | 4.70             | 0.059              | 2.5E-04 | 8               | 10.6                |
| P07737             | Profilin-1                                                                 | 4.68             | 0.178              | 7.1E-07 | 6               | 44.3                |
| P60174             | Triosephosphate isomerase                                                  | 4.55             | 0.089              | 6.3E-05 | 14              | 48.3                |
| P01889             | HLA class I histocompatibility antigen, B-7 alpha chain                    | 4.45             | 0.195              | 3.1E-02 | 3               | 12.7                |
| P06733             | Alpha-enolase                                                              | 4.38             | 0.067              | 3.0E-07 | 15              | 41.9                |
| P63104             | 14-3-3 protein zeta/delta                                                  | 4.26             | 0.089              | 9.8E-06 | 5               | 26.5                |
| O75368             | SH3 domain-binding glutamic acid-rich-like protein                         | 4.15             | 0.210              | 7.4E-04 | 3               | 20.2                |
| P30043             | Flavin reductase (NADPH)                                                   | 4.14             | 0.158              | 4.7E-04 | 3               | 18.9                |
| P10412             | Histone H1.4                                                               | 4.03             | 0.083              | 1.1E-09 | 6               | 15.5                |
| P63241             | Eukaryotic translation initiation factor 5A-1                              | 4.00             | 0.140              | 2.6E-03 | 4               | 13.6                |
| Q9Y2S2             | Lambda-crystallin homolog                                                  | 4.00             | 0.356              | 2.1E-02 | 5               | 21.6                |
| P02768             | Serum albumin                                                              | 3.95             | 0.035              | 0.0E+00 | 42              | 61.4                |
| P07108             | Acyl-CoA-binding protein                                                   | 3.93             | 0.197              | 8.0E-04 | 3               | 50.6                |
| Q99729             | Heterogeneous nuclear ribonucleoprotein A/B                                | 3.91             | 0.083              | 1.8E-05 | 4               | 10.5                |
| P62750             | 60S ribosomal protein L23a                                                 | 3.89             | 0.074              | 2.0E-05 | 4               | 26.9                |
| P51858             | Hepatoma-derived growth factor                                             | 3.86             | 0.148              | 3.6E-03 | 3               | 14.6                |
| P40925             | Malate dehydrogenase, cytoplasmic                                          | 3.81             | 0.154              | 1.0E-04 | 7               | 24.6                |
| P22087             | rRNA 2'-O-methyltransferase fibrillar                                      | 3.78             | 0.083              | 2.4E-04 | 6               | 17.8                |
| P04406             | Glyceraldehyde-3-phosphate dehydrogenase                                   | 3.70             | 0.057              | 0.0E+00 | 11              | 39.1                |
| P07686             | Beta-hexosaminidase subunit beta                                           | 3.68             | 0.369              | 3.8E-02 | 3               | 5.9                 |
| P30086             | Phosphatidylethanolamine-binding protein 1                                 | 3.66             | 0.068              | 1.0E-06 | 7               | 39.0                |
| P06744             | Glucose-6-phosphate isomerase                                              | 3.64             | 0.110              | 9.8E-05 | 6               | 11.5                |
| P07195             | L-lactate dehydrogenase B chain                                            | 3.53             | 0.069              | 7.2E-10 | 7               | 21.6                |
| P00338             | L-lactate dehydrogenase A chain                                            | 3.51             | 0.058              | 2.0E-10 | 7               | 17.8                |
| P04080             | Cystatin-B                                                                 | 3.51             | 0.090              | 2.8E-05 | 3               | 45.9                |
| P02787             | Serotransferrin                                                            | 3.50             | 0.064              | 2.3E-12 | 22              | 32.5                |
| Q9UL46             | Proteasome activator complex subunit 2                                     | 3.49             | 0.160              | 6.3E-03 | 4               | 21.8                |
| P13796             | Plastin-2                                                                  | 3.47             | 0.262              | 2.4E-02 | 3               | 6.2                 |
| Q00796             | Sorbitol dehydrogenase                                                     | 3.45             | 0.084              | 3.5E-02 | 3               | 9.8                 |
| P07741             | Adenine phosphoribosyltransferase                                          | 3.42             | 0.252              | 1.9E-02 | 3               | 20.0                |
| P23526             | Adenosylhomocysteinase                                                     | 3.37             | 0.122              | 1.2E-05 | 6               | 16.0                |
| P29401             | Transketolase                                                              | 3.34             | 0.079              | 4.2E-06 | 9               | 13.6                |
| P31948             | Stress-induced-phosphoprotein 1                                            | 3.31             | 0.102              | 1.3E-07 | 11              | 17.9                |
| Q99497             | Protein DJ-1                                                               | 3.26             | 0.136              | 3.3E-03 | 6               | 28.0                |
| P09429             | High mobility group protein B1                                             | 3.26             | 0.125              | 3.3E-05 | 6               | 27.0                |
| Q01105             | Protein SET                                                                | 3.25             | 0.105              | 1.2E-04 | 7               | 26.2                |
| P99999             | Cytochrome c                                                               | 3.23             | 0.144              | 1.9E-04 | 4               | 39.0                |
| Q08380             | Galectin-3-binding protein                                                 | 3.17             | 0.243              | 4.8E-04 | 7               | 15.0                |
| Q06323             | Proteasome activator complex subunit 1                                     | 3.17             | 0.060              | 7.8E-10 | 10              | 37.3                |
| P26447             | Protein S100-A4                                                            | 3.15             | 0.047              | 3.1E-08 | 4               | 35.6                |
| Q13838             | Spliceosome RNA helicase DDX39B                                            | 3.14             | 0.074              | 3.9E-07 | 8               | 21.3                |
| Q8NC51             | Plasminogen activator inhibitor 1 RNA-binding protein                      | 3.12             | 0.116              | 1.2E-04 | 7               | 14.5                |
| P54819             | Adenylate kinase 2, mitochondrial                                          | 3.10             | 0.150              | 2.7E-03 | 4               | 18.8                |
| P14618             | Pyruvate kinase PKM                                                        | 3.07             | 0.072              | 8.3E-13 | 16              | 33.9                |
| Q12906             | Interleukin enhancer-binding factor 3                                      | 3.04             | 0.099              | 1.6E-06 | 15              | 18.6                |
| Q12931             | Heat shock protein 75 kDa, mitochondrial                                   | 3.03             | 0.152              | 1.0E-03 | 5               | 7.8                 |
| O95336             | 6-phosphogluconolactonase                                                  | 3.00             | 0.127              | 1.5E-02 | 4               | 22.9                |
| P08758             | Annexin A5                                                                 | 2.97             | 0.043              | 0.0E+00 | 13              | 41.6                |
| Q9Y2X3             | Nucleolar protein 58                                                       | 2.88             | 0.165              | 5.8E-03 | 6               | 11.9                |
| P49588             | Alanine--tRNA ligase, cytoplasmic                                          | 2.82             | 0.159              | 7.1E-03 | 4               | 4.3                 |
| P08238             | Heat shock protein HSP 90-beta                                             | 2.82             | 0.091              | 2.8E-06 | 10              | 10.8                |
| O75348             | V-type proton ATPase subunit G 1                                           | 2.71             | 0.081              | 2.8E-04 | 3               | 31.4                |
| Q9BRA2             | Thioredoxin domain-containing protein 17                                   | 2.68             | 0.243              | 3.2E-02 | 3               | 26.8                |
| P13639             | Elongation factor 2                                                        | 2.67             | 0.074              | 1.5E-11 | 18              | 23.0                |
| Q04760             | Lactoylglutathione lyase                                                   | 2.65             | 0.169              | 1.9E-03 | 3               | 14.7                |
| P60842             | Eukaryotic initiation factor 4A-1                                          | 2.63             | 0.093              | 3.8E-05 | 8               | 19.7                |
| Q96DB5             | Regulator of microtubule dynamics protein 1                                | 2.61             | 0.147              | 1.1E-02 | 3               | 8.9                 |
| P17096             | High mobility group protein HMG-I/HMG-Y                                    | 19.10            | NA                 | NA      | 2               | 23.4                |
| P14174             | Macrophage migration inhibitory factor                                     | 11.59            | NA                 | NA      | 2               | 17.4                |
| P31939             | Bifunctional purine biosynthesis protein PURH                              | 6.26             | NA                 | NA      | 2               | 3.4                 |
| P55769             | NHP2-like protein 1                                                        | 5.05             | NA                 | NA      | 2               | 18.0                |
| Q99848             | Probable rRNA-processing protein EBP2                                      | 4.86             | NA                 | NA      | 2               | 9.5                 |
| Q96G03             | Phosphoglucomutase-2                                                       | 4.13             | NA                 | NA      | 2               | 4.1                 |
| O00625             | Pirin                                                                      | 4.08             | NA                 | NA      | 2               | 6.2                 |
| O15347             | High mobility group protein B3                                             | 4.05             | NA                 | NA      | 2               | 13.0                |
| Q15819             | Ubiquitin-conjugating enzyme E2 variant 2                                  | 3.87             | 0.200              | 2.1E-01 | 3               | 20.0                |
| Q96C86             | m7GpppX diphosphatase                                                      | 3.76             | NA                 | NA      | 2               | 8.3                 |
| Q16658             | Fascin                                                                     | 3.67             | NA                 | NA      | 2               | 5.3                 |
| P23588             | Eukaryotic translation initiation factor 4B                                | 3.42             | NA                 | NA      | 2               | 4.7                 |
| Q53EL6             | Programmed cell death protein 4                                            | 3.39             | NA                 | NA      | 2               | 4.7                 |
| P17540             | Creatine kinase S-type, mitochondrial                                      | 3.38             | NA                 | NA      | 2               | 6.9                 |
| O75347             | Tubulin-specific chaperone A                                               | 3.24             | 0.628              | 2.7E-01 | 3               | 26.9                |
| Q13428             | Treacle protein                                                            | 3.19             | NA                 | NA      | 2               | 2.2                 |
| P67809             | Nuclease-sensitive element-binding protein 1                               | 3.09             | 0.369              | 6.7E-02 | 3               | 14.2                |
| P08621             | U1 small nuclear ribonucleoprotein 70 kDa                                  | 3.02             | NA                 | NA      | 2               | 4.3                 |
| P16152             | Carbonyl reductase [NADPH] 1                                               | 3.01             | NA                 | NA      | 2               | 8.7                 |
| P52566             | Rho GDP-dissociation inhibitor 2                                           | 3.00             | NA                 | NA      | 2               | 15.4                |
| Q07021             | Complement component 1 Q subcomponent-binding protein, mitochondrial       | 2.98             | NA                 | NA      | 2               | 5.0                 |
| P14550             | Alcohol dehydrogenase [NADP(+)]                                            | 2.93             | NA                 | NA      | 2               | 5.5                 |
| Q9H1E3             | Nuclear ubiquitously casein and cyclin-dependent kinase substrate 1        | 2.90             | NA                 | NA      | 2               | 9.1                 |
| P58546             | Myotrophin                                                                 | 2.88             | NA                 | NA      | 2               | 16.9                |
| Q13243             | Serine/arginine-rich splicing factor 5                                     | 2.82             | NA                 | NA      | 2               | 5.9                 |
| Q3LXA3             | Bifunctional ATP-dependent dihydroxyacetone kinase/FAD-AMP lyase (cycling) | 2.80             | NA                 | NA      | 2               | 2.6                 |
| P13929             | Beta-enolase                                                               | 2.76             | NA                 | NA      | 2               | 6.7                 |
| P12955             | Xaa-Pro dipeptidase                                                        | 2.74             | 0.336              | 1.2E-01 | 3               | 7.1                 |
| Q9UQ80             | Proliferation-associated protein 2G4                                       | 2.73             | NA                 | NA      | 2               | 5.1                 |
| O15533             | Tapasin                                                                    | 2.69             | NA                 | NA      | 2               | 4.2                 |
| P05141             | ADP/ATP translocase 2                                                      | 2.69             | NA                 | NA      | 2               | 7.7                 |
| Q13442             | 28 kDa heat- and acid-stable phosphoprotein                                | 2.66             | 0.257              | 2.1E-01 | 3               | 24.3                |
| P06865             | Beta-hexosaminidase subunit alpha                                          | 2.66             | 0.045              | 2.9E-01 | 3               | 4.9                 |
| P00441             | Superoxide dismutase [Cu-Zn]                                               | 2.63             | NA                 | NA      | 2               | 13.0                |
| P53999             | Activated RNA polymerase II transcriptional coactivator p15                | 2.60             | NA                 | NA      | 2               | 15.7                |
| P30085             | UMP-CMP kinase                                                             | 2.59             | NA                 | NA      | 2               | 10.7                |
| Q9NY12             | H/ACA ribonucleoprotein complex subunit 1                                  | 2.59             | NA                 | NA      | 2               | 7.4                 |
| Q9BUP0             | EF-hand domain-containing protein D1                                       | 2.58             | 0.138              | 8.5E-02 | 3               | 8.8                 |

Table S4-Sample UM28

|        |                                                               |      |       |         |    |      |
|--------|---------------------------------------------------------------|------|-------|---------|----|------|
| P05387 | 60S acidic ribosomal protein P2                               | 2.57 | 0.111 | 2.2E-04 | 4  | 53.9 |
| O00567 | Nucleolar protein 56                                          | 2.57 | 0.127 | 4.8E-04 | 6  | 9.3  |
| P07910 | Heterogeneous nuclear ribonucleoproteins C1/C2                | 2.55 | 0.093 | 1.1E-06 | 9  | 26.5 |
| P57729 | Ras-related protein Rab-38                                    | 2.52 | 0.226 | 7.7E-03 | 4  | 19.4 |
| Q07955 | Serine/arginine-rich splicing factor 1                        | 2.50 | 0.103 | 6.1E-05 | 4  | 12.9 |
| Q9NR56 | Muscleblind-like protein 1                                    | 2.50 | NA    | NA      | 2  | 4.4  |
| Q9NX24 | H/ACA ribonucleoprotein complex subunit 2                     | 2.49 | NA    | NA      | 2  | 19.0 |
| Q8IVF2 | Protein AHNK2                                                 | 2.48 | 0.212 | 1.9E-02 | 5  | 0.8  |
| P10599 | Thioredoxin                                                   | 2.48 | 0.087 | 1.6E-06 | 4  | 39.0 |
| P52565 | Rho GDP-dissociation inhibitor 1                              | 2.46 | 0.088 | 1.0E-03 | 4  | 22.5 |
| P37837 | Transaldolase                                                 | 2.45 | 0.065 | 1.9E-05 | 8  | 23.1 |
| P07900 | Heat shock protein HSP 90-alpha                               | 2.44 | 0.065 | 1.1E-05 | 12 | 14.5 |
| P13693 | Translationally-controlled tumor protein                      | 2.44 | NA    | NA      | 2  | 15.7 |
| P27695 | DNA-(apurinic or apyrimidinic site) lyase                     | 2.44 | 0.447 | 2.9E-01 | 3  | 8.5  |
| P52209 | 6-phosphogluconate dehydrogenase, decarboxylating             | 2.42 | 0.168 | 1.1E-01 | 3  | 4.8  |
| O76021 | Ribosomal L1 domain-containing protein 1                      | 2.41 | 0.155 | 4.3E-02 | 3  | 5.3  |
| O94906 | Pre-mRNA-processing factor 6                                  | 2.41 | NA    | NA      | 2  | 2.1  |
| Q12905 | Interleukin enhancer-binding factor 2                         | 2.40 | 0.121 | 1.1E-04 | 6  | 20.3 |
| P62826 | GTP-binding nuclear protein Ran                               | 2.39 | NA    | NA      | 2  | 13.9 |
| Q13185 | Chromobox protein homolog 3                                   | 2.38 | 0.114 | 6.8E-05 | 4  | 26.8 |
| P22234 | Multifunctional protein ADE2                                  | 2.38 | NA    | NA      | 2  | 4.5  |
| Q9Y2Q3 | Glutathione S-transferase kappa 1                             | 2.35 | 0.111 | 2.7E-02 | 3  | 15.5 |
| P50395 | Rab GDP dissociation inhibitor beta                           | 2.33 | 0.111 | 8.1E-03 | 6  | 16.9 |
| P48681 | Nestin                                                        | 2.32 | 0.146 | 1.1E-03 | 6  | 4.7  |
| Q13423 | NAD(P) transhydrogenase, mitochondrial                        | 2.32 | 0.064 | 9.5E-07 | 11 | 11.0 |
| P26641 | Elongation factor 1-gamma                                     | 2.30 | 0.143 | 3.2E-03 | 4  | 8.9  |
| Q16698 | 2,4-dienoyl-CoA reductase, mitochondrial                      | 2.30 | 0.150 | 3.7E-03 | 7  | 22.1 |
| P30044 | Peroxisomal protein PEX10, mitochondrial                      | 2.30 | 0.103 | 7.7E-03 | 5  | 28.0 |
| Q9Y3D0 | Mitotic spindle-associated MMXD complex subunit MIP18         | 2.30 | NA    | NA      | 2  | 17.2 |
| P27348 | 14-3-3 protein theta                                          | 2.27 | 0.136 | 3.0E-03 | 5  | 21.6 |
| P62263 | 40S ribosomal protein S14                                     | 2.27 | 0.140 | 8.6E-02 | 3  | 29.8 |
| P07602 | Prosaposin                                                    | 2.27 | 0.095 | 1.3E-04 | 7  | 10.5 |
| O00154 | Cytosolic acyl coenzyme A thioester hydrolase                 | 2.27 | 0.420 | 1.7E-01 | 4  | 15.5 |
| Q16629 | Serine/arginine-rich splicing factor 7                        | 2.26 | 0.141 | 6.9E-04 | 3  | 16.4 |
| P61604 | 10 kDa heat shock protein, mitochondrial                      | 2.26 | 0.052 | 1.4E-05 | 4  | 41.2 |
| P46783 | 40S ribosomal protein S10                                     | 2.25 | 0.448 | 1.5E-01 | 3  | 20.0 |
| P25398 | 40S ribosomal protein S12                                     | 2.24 | 0.133 | 1.0E-02 | 3  | 22.0 |
| P29692 | Elongation factor 1-delta                                     | 2.23 | 0.084 | 2.4E-02 | 4  | 16.0 |
| Q1KMD3 | Heterogeneous nuclear ribonucleoprotein U-like protein 2      | 2.22 | 0.076 | 6.9E-04 | 6  | 7.9  |
| P25786 | Proteasome subunit alpha type-1                               | 2.21 | 0.091 | 4.0E-03 | 5  | 20.2 |
| Q00688 | Peptidyl-prolyl cis-trans isomerase FKBP3                     | 2.20 | 0.559 | 3.1E-01 | 3  | 12.9 |
| Q96C19 | EF-hand domain-containing protein D2                          | 2.20 | 0.036 | 1.4E-05 | 3  | 9.2  |
| P46776 | 60S ribosomal protein L27a                                    | 2.19 | NA    | NA      | 2  | 14.2 |
| Q99798 | Aconitate hydratase, mitochondrial                            | 2.18 | 0.117 | 6.6E-04 | 9  | 15.0 |
| P62241 | 40S ribosomal protein S8                                      | 2.17 | 0.139 | 1.4E-02 | 4  | 14.9 |
| P62829 | 60S ribosomal protein L23                                     | 2.17 | 0.072 | 1.2E-02 | 3  | 23.6 |
| P84077 | ADP-ribosylation factor 1                                     | 2.17 | 0.097 | 3.6E-04 | 3  | 16.0 |
| P16188 | HLA class I histocompatibility antigen, A-30 alpha chain      | 2.16 | NA    | NA      | 2  | 6.6  |
| O43852 | Calumenin                                                     | 2.16 | 0.143 | 5.5E-03 | 8  | 32.7 |
| P08574 | Cytochrome c1, heme protein, mitochondrial                    | 2.16 | NA    | NA      | 2  | 7.1  |
| P20042 | Eukaryotic translation initiation factor 2 subunit 2          | 2.15 | 0.236 | 6.1E-02 | 3  | 13.2 |
| Q9UKV3 | Apoptotic chromatin condensation inducer in the nucleus       | 2.14 | NA    | NA      | 2  | 1.7  |
| Q86V81 | THO complex subunit 4                                         | 2.13 | NA    | NA      | 2  | 8.2  |
| Q8NFV4 | Alpha/beta hydrolase domain-containing protein 11             | 2.12 | NA    | NA      | 2  | 8.6  |
| P18621 | 60S ribosomal protein L17                                     | 2.12 | 0.235 | 2.0E-01 | 3  | 18.5 |
| P15121 | Aldose reductase                                              | 2.11 | 0.103 | 2.5E-03 | 5  | 17.1 |
| P07093 | Glia-derived nexin                                            | 2.09 | NA    | NA      | 2  | 6.5  |
| P04075 | Fructose-bisphosphate aldolase A                              | 2.08 | 0.042 | 3.7E-06 | 13 | 42.9 |
| P24821 | Tenascin                                                      | 2.08 | 0.212 | 1.6E-01 | 3  | 1.6  |
| P40926 | Malate dehydrogenase, mitochondrial                           | 2.07 | 0.058 | 2.1E-08 | 12 | 41.4 |
| P51608 | Methyl-CpG-binding protein 2                                  | 2.06 | 0.281 | 5.0E-02 | 5  | 11.5 |
| O00299 | Chloride intracellular channel protein 1                      | 2.06 | 0.167 | 1.4E-01 | 3  | 13.7 |
| P55786 | Puromycin-sensitive aminopeptidase                            | 2.05 | 0.237 | 1.0E-01 | 3  | 3.6  |
| P22314 | Ubiquitin-like modifier-activating enzyme 1                   | 2.05 | 0.160 | 2.9E-03 | 6  | 5.8  |
| P12004 | Proliferating cell nuclear antigen                            | 2.04 | NA    | NA      | 2  | 8.4  |
| O00410 | Importin-5                                                    | 2.03 | NA    | NA      | 2  | 1.7  |
| Q9Y383 | Putative RNA-binding protein Luc7-like 2                      | 2.03 | NA    | NA      | 2  | 4.3  |
| P37802 | Transgelin-2                                                  | 2.03 | 0.112 | 7.4E-04 | 4  | 21.6 |
| P31146 | Coronin-1A                                                    | 2.02 | 0.164 | 2.9E-01 | 3  | 8.0  |
| P63244 | Guanine nucleotide-binding protein subunit beta-2-like 1      | 2.02 | 0.115 | 1.5E-03 | 6  | 16.7 |
| P07339 | Cathepsin D                                                   | 2.02 | 0.064 | 4.5E-07 | 7  | 20.1 |
| P09622 | Dihydropyridyl dehydrogenase, mitochondrial                   | 2.01 | 0.090 | 1.0E-03 | 5  | 10.6 |
| P30533 | Alpha-2-macroglobulin receptor-associated protein             | 2.01 | 0.153 | 1.8E-02 | 5  | 13.7 |
| P11766 | Alcohol dehydrogenase class-3                                 | 2.00 | NA    | NA      | 2  | 6.4  |
| Q43598 | 2'-deoxynucleoside 5'-phosphate N-hydrolase 1                 | 2.00 | NA    | NA      | 2  | 18.4 |
| Q00839 | Heterogeneous nuclear ribonucleoprotein U                     | 2.00 | 0.069 | 2.5E-06 | 10 | 12.8 |
| Q14683 | Structural maintenance of chromosomes protein 1A              | 2.00 | NA    | NA      | 2  | 2.3  |
| P42224 | Signal transducer and activator of transcription 1-alpha/beta | 2.00 | 0.446 | 1.8E-01 | 5  | 9.3  |
| P62851 | 40S ribosomal protein S25                                     | 2.00 | 0.108 | 1.9E-03 | 4  | 24.0 |
| O75083 | WD repeat-containing protein 1                                | 2.00 | 0.114 | 7.5E-04 | 3  | 6.8  |
| Q9BVJ6 | U3 small nucleolar RNA-associated protein 14 homolog A        | 1.99 | NA    | NA      | 2  | 4.3  |
| P62424 | 60S ribosomal protein L7a                                     | 1.99 | 0.198 | 5.5E-02 | 3  | 11.7 |
| Q92598 | Heat shock protein 105 kDa                                    | 1.99 | NA    | NA      | 2  | 2.4  |
| Q96AG4 | Leucine-rich repeat-containing protein 59                     | 1.98 | 0.077 | 1.2E-03 | 5  | 17.9 |
| O60841 | Eukaryotic translation initiation factor 5B                   | 1.98 | 0.411 | 3.4E-01 | 3  | 3.0  |
| Q9NV17 | ATPase family AAA domain-containing protein 3A                | 1.98 | NA    | NA      | 2  | 3.9  |
| Q9Y4W6 | AFG3-like protein 2                                           | 1.98 | 0.083 | 1.1E-03 | 5  | 5.4  |
| Q92616 | Translational activator GCN1                                  | 1.98 | 0.231 | 9.8E-02 | 3  | 1.6  |
| P06753 | Tropomyosin alpha-3 chain                                     | 1.98 | 0.118 | 2.9E-03 | 4  | 13.0 |
| P30040 | Endoplasmic reticulum resident protein 29                     | 1.97 | NA    | NA      | 2  | 8.4  |
| P16219 | Short-chain specific acyl-CoA dehydrogenase, mitochondrial    | 1.96 | NA    | NA      | 2  | 4.6  |
| P22626 | Heterogeneous nuclear ribonucleoproteins A2/B1                | 1.95 | 0.069 | 3.7E-09 | 13 | 36.3 |
| Q14103 | Heterogeneous nuclear ribonucleoprotein D0                    | 1.95 | 0.150 | 9.6E-02 | 4  | 15.5 |
| P49207 | 60S ribosomal protein L34                                     | 1.94 | 0.222 | 9.0E-02 | 3  | 20.5 |
| Q86UX7 | Fermitin family homolog 3                                     | 1.94 | 0.290 | 8.7E-02 | 3  | 6.7  |
| Q5JRX3 | Presequence protease, mitochondrial                           | 1.93 | NA    | NA      | 2  | 2.4  |
| P37108 | Signal recognition particle 14 kDa protein                    | 1.92 | 0.092 | 5.5E-02 | 3  | 22.1 |
| P18669 | Phosphoglycerate mutase 1                                     | 1.92 | 0.073 | 1.5E-05 | 5  | 32.3 |
| O43390 | Heterogeneous nuclear ribonucleoprotein R                     | 1.92 | 0.121 | 6.1E-04 | 8  | 15.0 |
| P13797 | Plastin-3                                                     | 1.92 | NA    | NA      | 2  | 2.5  |
| P23284 | Peptidyl-prolyl cis-trans isomerase B                         | 1.92 | 0.051 | 2.9E-10 | 13 | 51.4 |
| Q9UHX1 | Poly(U)-binding-splicing factor PUF60                         | 1.92 | 0.089 | 7.8E-03 | 3  | 5.2  |
| Q07020 | 60S ribosomal protein L18                                     | 1.91 | 0.091 | 3.7E-03 | 4  | 25.5 |
| P60900 | Proteasome subunit alpha type-6                               | 1.91 | NA    | NA      | 2  | 8.5  |
| P39019 | 40S ribosomal protein S19                                     | 1.91 | 0.051 | 3.6E-06 | 6  | 25.5 |
| P07203 | Glutathione peroxidase 1                                      | 1.91 | NA    | NA      | 2  | 10.3 |
| P38646 | Stress-70 protein, mitochondrial                              | 1.90 | 0.090 | 3.6E-07 | 16 | 28.0 |
| Q02818 | Nucleobindin-1                                                | 1.90 | 0.072 | 8.6E-06 | 5  | 14.5 |
| P62158 | Calmodulin                                                    | 1.90 | 0.079 | 6.0E-04 | 3  | 22.1 |
| O75822 | Eukaryotic translation initiation factor 3 subunit J          | 1.90 | NA    | NA      | 2  | 7.8  |
| P08670 | Vimentin                                                      | 1.90 | 0.035 | 0.0E+00 | 31 | 58.4 |
| P78527 | DNA-dependent protein kinase catalytic subunit                | 1.89 | 0.054 | 1.0E-11 | 32 | 7.4  |
| Q86UE4 | Protein LYRIC                                                 | 1.89 | 0.303 | 1.7E-01 | 4  | 9.5  |
| P08865 | 40S ribosomal protein SA                                      | 1.87 | 0.059 | 2.3E-05 | 7  | 30.5 |
| O75390 | Citrate synthase, mitochondrial                               | 1.87 | 0.055 | 1.9E-05 | 6  | 13.7 |

Table S4-Sample UM28

|        |                                                                                |      |       |         |    |      |
|--------|--------------------------------------------------------------------------------|------|-------|---------|----|------|
| O75569 | Interferon-inducible double-stranded RNA-dependent protein kinase activator A  | 1.85 | NA    | NA      | 2  | 5.8  |
| P30084 | Enoyl-CoA hydratase, mitochondrial                                             | 1.85 | 0.117 | 3.5E-01 | 3  | 12.8 |
| P21796 | Voltage-dependent anion-selective channel protein 1                            | 1.85 | 0.131 | 3.0E-04 | 9  | 38.5 |
| Q13510 | Acid ceramidase                                                                | 1.85 | 0.134 | 1.6E-02 | 4  | 8.1  |
| Q08211 | ATP-dependent RNA helicase A                                                   | 1.85 | 0.167 | 2.1E-02 | 7  | 6.2  |
| Q13435 | Splicing factor 3B subunit 2                                                   | 1.84 | 0.147 | 2.5E-02 | 5  | 7.2  |
| P12956 | X-ray repair cross-complementing protein 6                                     | 1.84 | 0.077 | 8.6E-06 | 16 | 26.4 |
| P26599 | Poly pyrimidine tract-binding protein 1                                        | 1.84 | 0.123 | 3.3E-03 | 5  | 7.0  |
| P02790 | Hemopexin                                                                      | 1.84 | 0.125 | 4.0E-03 | 4  | 7.6  |
| P24534 | Elongation factor 1-beta                                                       | 1.84 | 0.082 | 4.3E-03 | 4  | 16.4 |
| Q86TC7 | Regulator of microtubule dynamics protein 3                                    | 1.83 | NA    | NA      | 2  | 5.3  |
| P23246 | Splicing factor, proline- and glutamine-rich                                   | 1.83 | 0.116 | 5.4E-04 | 7  | 11.0 |
| P11142 | Heat shock cognate 71 kDa protein                                              | 1.83 | 0.053 | 2.4E-06 | 16 | 29.1 |
| Q9NTZ6 | RNA-binding protein 12                                                         | 1.83 | NA    | NA      | 2  | 3.3  |
| P13010 | X-ray repair cross-complementing protein 5                                     | 1.83 | 0.093 | 4.8E-05 | 9  | 14.5 |
| P19367 | Hexokinase-1                                                                   | 1.82 | 0.061 | 1.3E-05 | 10 | 11.5 |
| P07237 | Protein disulfide-isomerase                                                    | 1.82 | 0.057 | 9.6E-07 | 18 | 32.1 |
| Q9GZT3 | SRA stem-loop-interacting RNA-binding protein, mitochondrial                   | 1.81 | NA    | NA      | 2  | 23.9 |
| P09651 | Heterogeneous nuclear ribonucleoprotein A1                                     | 1.81 | 0.059 | 2.6E-07 | 8  | 28.5 |
| Q15424 | Scaffold attachment factor B1                                                  | 1.81 | NA    | NA      | 2  | 1.9  |
| P20618 | Proteasome subunit beta type-1                                                 | 1.80 | NA    | NA      | 2  | 9.5  |
| P49792 | E3 SUMO-protein ligase RanBP2                                                  | 1.80 | 0.174 | 6.8E-02 | 4  | 1.0  |
| P17980 | 26S protease regulatory subunit 6A                                             | 1.80 | 0.589 | 1.8E-01 | 3  | 7.7  |
| P35637 | RNA-binding protein FUS                                                        | 1.80 | 0.091 | 7.4E-03 | 4  | 7.6  |
| P09525 | Annexin A4                                                                     | 1.80 | 0.072 | 4.3E-06 | 11 | 30.7 |
| Q9HD20 | Manganese-transporting ATPase 13A1                                             | 1.80 | NA    | NA      | 2  | 2.0  |
| Q9P2E9 | Ribosome-binding protein 1                                                     | 1.80 | 0.083 | 2.0E-04 | 8  | 6.7  |
| P53597 | Succinyl-CoA ligase [ADP/GDP-forming] subunit alpha, mitochondrial             | 1.80 | 0.049 | 2.9E-03 | 3  | 9.8  |
| P55145 | Mesencephalic astrocyte-derived neurotrophic factor                            | 1.79 | NA    | NA      | 2  | 11.0 |
| Q13263 | Transcription intermediary factor 1-beta                                       | 1.79 | 0.092 | 3.1E-03 | 3  | 3.4  |
| P38117 | Electron transfer flavoprotein subunit beta                                    | 1.79 | 0.133 | 5.7E-02 | 5  | 20.0 |
| P62140 | Serine/threonine-protein phosphatase PP1-beta catalytic subunit                | 1.79 | NA    | NA      | 2  | 5.8  |
| Q9NP81 | Serine--tRNA ligase, mitochondrial                                             | 1.78 | NA    | NA      | 2  | 6.9  |
| P26368 | Splicing factor U2AF 65 kDa subunit                                            | 1.78 | 0.077 | 3.8E-02 | 3  | 7.6  |
| Q99523 | Sortilin                                                                       | 1.78 | NA    | NA      | 2  | 2.6  |
| P35659 | Protein DEK                                                                    | 1.78 | NA    | NA      | 2  | 6.1  |
| P20810 | Calpastatin                                                                    | 1.77 | 0.131 | 7.1E-02 | 6  | 12.4 |
| Q14974 | Importin subunit beta-1                                                        | 1.77 | 0.087 | 1.1E-02 | 6  | 8.9  |
| O15400 | Syntaxin-7                                                                     | 1.77 | 0.081 | 1.3E-02 | 4  | 19.9 |
| O14979 | Heterogeneous nuclear ribonucleoprotein D-like                                 | 1.77 | 0.059 | 3.4E-02 | 3  | 5.0  |
| Q43143 | Putative pre-mRNA-splicing factor ATP-dependent RNA helicase DHX15             | 1.77 | 0.073 | 1.7E-02 | 3  | 4.0  |
| P48426 | Phosphatidylinositol 5-phosphate 4-kinase type-2 alpha                         | 1.77 | NA    | NA      | 2  | 6.4  |
| P38159 | RNA-binding motif protein, X chromosome                                        | 1.76 | 0.151 | 3.7E-02 | 4  | 11.0 |
| Q13151 | Heterogeneous nuclear ribonucleoprotein A0                                     | 1.76 | 0.054 | 1.6E-04 | 3  | 7.5  |
| P13804 | Electron transfer flavoprotein subunit alpha, mitochondrial                    | 1.75 | NA    | NA      | 2  | 6.9  |
| Q9ULV4 | Coronin-1C                                                                     | 1.75 | 0.151 | 6.7E-02 | 3  | 6.5  |
| P61254 | 60S ribosomal protein L26                                                      | 1.75 | NA    | NA      | 2  | 15.9 |
| Q15084 | Protein disulfide-isomerase A6                                                 | 1.75 | 0.052 | 3.2E-08 | 10 | 26.8 |
| P78347 | General transcription factor II-I                                              | 1.75 | 0.245 | 9.2E-02 | 4  | 4.0  |
| P46940 | Ras GTPase-activating-like protein IQGAP1                                      | 1.75 | 0.073 | 8.9E-05 | 13 | 9.7  |
| P51991 | Heterogeneous nuclear ribonucleoprotein A3                                     | 1.75 | 0.057 | 2.2E-06 | 9  | 28.6 |
| P02763 | Alpha-1-acid glycoprotein 1                                                    | 1.75 | 0.106 | 1.4E-02 | 3  | 19.4 |
| P40763 | Signal transducer and activator of transcription 3                             | 1.74 | NA    | NA      | 2  | 2.9  |
| P28838 | Cytosol aminopeptidase                                                         | 1.74 | 0.028 | 4.2E-02 | 5  | 12.1 |
| P30049 | ATP synthase subunit delta, mitochondrial                                      | 1.73 | NA    | NA      | 2  | 13.7 |
| P36578 | 60S ribosomal protein L4                                                       | 1.73 | 0.208 | 1.4E-02 | 9  | 21.1 |
| P83731 | 60S ribosomal protein L24                                                      | 1.73 | 0.166 | 1.3E-01 | 4  | 22.3 |
| P02765 | Alpha-2-HS-glycoprotein                                                        | 1.72 | 0.212 | 1.3E-01 | 3  | 7.6  |
| Q01844 | RNA-binding protein EWS                                                        | 1.71 | NA    | NA      | 2  | 2.3  |
| P39023 | 60S ribosomal protein L3                                                       | 1.71 | NA    | NA      | 2  | 6.0  |
| P42704 | Leucine-rich PPR motif-containing protein, mitochondrial                       | 1.71 | 0.395 | 1.1E-01 | 15 | 11.6 |
| Q92688 | Acidic leucine-rich nuclear phosphoprotein 32 family member B                  | 1.71 | 0.237 | 2.8E-01 | 5  | 17.5 |
| P27824 | Calnexin                                                                       | 1.70 | 0.091 | 1.2E-03 | 12 | 24.7 |
| P27635 | 60S ribosomal protein L10                                                      | 1.70 | 0.132 | 3.4E-02 | 4  | 21.0 |
| P30101 | Protein disulfide-isomerase A3                                                 | 1.70 | 0.042 | 3.2E-08 | 16 | 31.1 |
| Q02878 | 60S ribosomal protein L6                                                       | 1.70 | 0.084 | 7.7E-03 | 6  | 20.1 |
| P54652 | Heat shock-related 70 kDa protein 2                                            | 1.70 | 0.029 | 1.7E-04 | 6  | 11.7 |
| P26373 | 60S ribosomal protein L13                                                      | 1.70 | 0.085 | 5.6E-03 | 3  | 15.2 |
| P48739 | Phosphatidylinositol transfer protein beta isoform                             | 1.70 | NA    | NA      | 2  | 5.5  |
| P14854 | Cytochrome c oxidase subunit 6B1                                               | 1.70 | NA    | NA      | 2  | 23.3 |
| P55008 | Allograft inflammatory factor 1                                                | 1.69 | NA    | NA      | 2  | 15.6 |
| Q9Y5J7 | Mitochondrial import inner membrane translocase subunit Tim9                   | 1.68 | NA    | NA      | 2  | 25.8 |
| Q92945 | Far upstream element-binding protein 2                                         | 1.68 | 0.140 | 1.7E-01 | 8  | 16.5 |
| P34932 | Heat shock 70 kDa protein 4                                                    | 1.67 | 0.171 | 3.7E-02 | 4  | 4.5  |
| P09668 | Pro-cathepsin H                                                                | 1.67 | NA    | NA      | 2  | 7.8  |
| Q00059 | Transcription factor A, mitochondrial                                          | 1.67 | 0.102 | 7.8E-03 | 5  | 16.7 |
| Q13617 | Cullin-2                                                                       | 1.66 | NA    | NA      | 2  | 2.0  |
| P25788 | Proteasome subunit alpha type-3                                                | 1.66 | NA    | NA      | 2  | 4.7  |
| P31949 | Protein S100-A11                                                               | 1.66 | NA    | NA      | 2  | 23.8 |
| P62136 | Serine/threonine-protein phosphatase PP1-alpha catalytic subunit               | 1.65 | NA    | NA      | 2  | 4.2  |
| P62906 | 60S ribosomal protein L10a                                                     | 1.65 | 0.076 | 4.4E-04 | 6  | 26.3 |
| O95202 | LETM1 and EF-hand domain-containing protein 1, mitochondrial                   | 1.65 | 0.175 | 1.4E-01 | 6  | 9.1  |
| P63279 | SUMO-conjugating enzyme UBC9                                                   | 1.65 | NA    | NA      | 2  | 14.6 |
| Q9BZZ5 | Apoptosis inhibitor 5                                                          | 1.65 | 0.087 | 7.3E-03 | 4  | 7.6  |
| Q15365 | Poly(rC)-binding protein 1                                                     | 1.65 | 0.121 | 3.3E-03 | 3  | 12.1 |
| P46782 | 40S ribosomal protein S5                                                       | 1.64 | NA    | NA      | 2  | 8.3  |
| O14818 | Proteasome subunit alpha type-7                                                | 1.64 | 0.231 | 1.8E-01 | 3  | 11.7 |
| Q9NR28 | Diablo homolog, mitochondrial                                                  | 1.64 | NA    | NA      | 2  | 8.8  |
| Q08AM6 | Protein VAC14 homolog                                                          | 1.62 | NA    | NA      | 2  | 3.1  |
| Q16666 | Gamma-interferon-inducible protein 16                                          | 1.62 | 0.204 | 1.1E-01 | 3  | 3.7  |
| P30050 | 60S ribosomal protein L12                                                      | 1.61 | 0.155 | 3.4E-01 | 4  | 35.8 |
| P49755 | Transmembrane emp24 domain-containing protein 10                               | 1.60 | 0.381 | 1.5E-01 | 4  | 24.2 |
| P28161 | Glutathione S-transferase Mu 2                                                 | 1.60 | 0.071 | 1.5E-03 | 4  | 13.8 |
| P30048 | Thioredoxin-dependent peroxide reductase, mitochondrial                        | 1.60 | 0.053 | 2.7E-05 | 5  | 24.2 |
| O43681 | ATPase ASNA1                                                                   | 1.60 | 0.128 | 4.7E-01 | 3  | 10.1 |
| Q15046 | Lysine--tRNA ligase                                                            | 1.60 | 0.114 | 4.0E-02 | 4  | 6.5  |
| P60866 | 40S ribosomal protein S20                                                      | 1.59 | NA    | NA      | 2  | 19.3 |
| Q9NX63 | Coiled-coil-helix-coiled-coil-helix domain-containing protein 3, mitochondrial | 1.59 | NA    | NA      | 2  | 9.3  |
| P55809 | Succinyl-CoA:3-ketoacid coenzyme A transferase 1, mitochondrial                | 1.59 | 0.123 | 1.1E-01 | 4  | 5.0  |
| P62258 | 14-3-3 protein epsilon                                                         | 1.59 | 0.083 | 1.5E-03 | 8  | 27.1 |
| Q9Y3D9 | 28S ribosomal protein S23, mitochondrial                                       | 1.59 | NA    | NA      | 2  | 10.5 |
| P26640 | Valine--tRNA ligase                                                            | 1.58 | 0.068 | 1.8E-02 | 5  | 4.1  |
| Q9H2G2 | STE20-like serine/threonine-protein kinase                                     | 1.58 | NA    | NA      | 2  | 1.9  |
| P61978 | Heterogeneous nuclear ribonucleoprotein K                                      | 1.57 | 0.085 | 2.9E-04 | 13 | 32.6 |
| O43488 | Aflatoxin B1 aldehyde reductase member 2                                       | 1.57 | NA    | NA      | 2  | 5.3  |
| P49411 | Elongation factor Tu, mitochondrial                                            | 1.57 | 0.083 | 4.1E-03 | 12 | 30.5 |
| Q14978 | Nucleolar and coiled-body phosphoprotein 1                                     | 1.57 | NA    | NA      | 2  | 3.9  |
| O15212 | Prefoldin subunit 6                                                            | 1.56 | NA    | NA      | 2  | 11.6 |
| Q9UKM9 | RNA-binding protein Raly                                                       | 1.56 | 0.122 | 1.9E-02 | 3  | 13.7 |
| P08195 | 4F2 cell-surface antigen heavy chain                                           | 1.56 | 0.089 | 2.1E-04 | 7  | 14.9 |
| Q07866 | KH domain-containing, RNA-binding, signal transduction-associated protein 1    | 1.56 | 0.084 | 9.6E-03 | 5  | 9.3  |
| P07814 | Bifunctional glutamate/proline--tRNA ligase                                    | 1.56 | 0.103 | 6.5E-02 | 3  | 2.7  |
| O75874 | Iso citrate dehydrogenase [NADP] cytoplasmic                                   | 1.55 | NA    | NA      | 2  | 4.6  |
| Q15029 | 116 kDa U5 small nuclear ribonucleoprotein component                           | 1.54 | 0.148 | 2.2E-01 | 3  | 3.4  |
| P17844 | Probable ATP-dependent RNA helicase DDX5                                       | 1.54 | 0.120 | 5.5E-02 | 4  | 6.2  |

Table S4-Sample UM28

|        |                                                                       |      |       |         |    |      |
|--------|-----------------------------------------------------------------------|------|-------|---------|----|------|
| Q8IZQ5 | Selenoprotein H                                                       | 1.54 | NA    | NA      | 2  | 17.2 |
| Q86UP2 | Kinectin                                                              | 1.53 | 0.162 | 1.8E-02 | 6  | 5.9  |
| P49756 | RNA-binding protein 25                                                | 1.53 | NA    | NA      | 2  | 2.6  |
| P39687 | Acidic leucine-rich nuclear phosphoprotein 32 family member A         | 1.52 | 0.173 | 7.5E-02 | 4  | 14.5 |
| Q14152 | Eukaryotic translation initiation factor 3 subunit A                  | 1.52 | 0.248 | 6.8E-02 | 7  | 5.9  |
| O00571 | ATP-dependent RNA helicase DDX3X                                      | 1.52 | 0.571 | 2.7E-01 | 3  | 5.4  |
| P46777 | 60S ribosomal protein L5                                              | 1.52 | 0.082 | 4.3E-04 | 5  | 18.9 |
| P05388 | 60S acidic ribosomal protein P0                                       | 1.51 | 0.137 | 3.3E-02 | 5  | 13.9 |
| Q5SSJ5 | Heterochromatin protein 1-binding protein 3                           | 1.51 | 0.088 | 2.6E-03 | 4  | 7.4  |
| P18859 | ATP synthase-coupling factor 6, mitochondrial                         | 1.51 | NA    | NA      | 2  | 13.0 |
| P46779 | 60S ribosomal protein L28                                             | 1.51 | 0.098 | 5.8E-02 | 3  | 19.0 |
| Q15293 | Reticulocalbin-1                                                      | 1.50 | NA    | NA      | 2  | 4.5  |
| P61247 | 40S ribosomal protein S3a                                             | 1.50 | 0.087 | 1.5E-02 | 8  | 29.2 |
| P52597 | Heterogeneous nuclear ribonucleoprotein F                             | 1.50 | 0.155 | 2.7E-01 | 3  | 7.0  |
| Q9Y411 | Unconventional myosin-Va                                              | 1.49 | NA    | NA      | 2  | 1.0  |
| P62249 | 40S ribosomal protein S16                                             | 1.49 | 0.051 | 1.4E-03 | 5  | 35.6 |
| Q8IUX7 | Adipocyte enhancer-binding protein 1                                  | 1.49 | 0.135 | 2.8E-02 | 4  | 5.4  |
| P28066 | Proteasome subunit alpha type-5                                       | 1.48 | NA    | NA      | 2  | 15.8 |
| P82909 | 28S ribosomal protein S36, mitochondrial                              | 1.48 | NA    | NA      | 2  | 25.2 |
| P10809 | 60 kDa heat shock protein, mitochondrial                              | 1.48 | 0.115 | 1.7E-02 | 14 | 27.1 |
| O75165 | DnaJ homolog subfamily C member 13                                    | 1.48 | NA    | NA      | 2  | 0.9  |
| Q16836 | Hydroxyacyl-coenzyme A dehydrogenase, mitochondrial                   | 1.47 | NA    | NA      | 2  | 5.7  |
| Q9H2U2 | Inorganic pyrophosphatase 2, mitochondrial                            | 1.47 | NA    | NA      | 2  | 6.6  |
| P62701 | 40S ribosomal protein S4, X isoform                                   | 1.46 | 0.287 | 1.9E-01 | 3  | 9.9  |
| P14866 | Heterogeneous nuclear ribonucleoprotein L                             | 1.46 | 0.091 | 7.5E-03 | 9  | 22.2 |
| P08237 | ATP-dependent 6-phosphofructokinase, muscle type                      | 1.46 | NA    | NA      | 2  | 2.8  |
| P09661 | U2 small nuclear ribonucleoprotein A'                                 | 1.46 | NA    | NA      | 2  | 8.6  |
| P36955 | Pigment epithelium-derived factor                                     | 1.45 | 0.291 | 2.9E-01 | 6  | 15.6 |
| P52943 | Cysteine-rich protein 2                                               | 1.45 | NA    | NA      | 2  | 18.8 |
| O15145 | Actin-related protein 2/3 complex subunit 3                           | 1.45 | NA    | NA      | 2  | 12.4 |
| P12270 | Nucleoprotein TPR                                                     | 1.45 | 0.183 | 1.8E-01 | 3  | 2.0  |
| Q92841 | Probable ATP-dependent RNA helicase DDX17                             | 1.44 | 0.228 | 1.5E-01 | 3  | 3.8  |
| P09012 | U1 small nuclear ribonucleoprotein A                                  | 1.44 | 0.080 | 1.7E-01 | 3  | 9.9  |
| Q9Y277 | Voltage-dependent anion-selective channel protein 3                   | 1.44 | 1.830 | 1.6E-01 | 4  | 14.8 |
| P27797 | Calreticulin                                                          | 1.44 | 0.134 | 4.6E-02 | 9  | 26.6 |
| Q86AE4 | Far upstream element-binding protein 1                                | 1.44 | 0.015 | 2.1E-01 | 5  | 7.8  |
| Q9Y4L1 | Hypoxia up-regulated protein 1                                        | 1.44 | 0.075 | 2.4E-02 | 7  | 8.4  |
| Q15942 | Zyxin                                                                 | 1.44 | NA    | NA      | 2  | 5.4  |
| P84103 | Serine/arginine-rich splicing factor 3                                | 1.44 | 0.108 | 1.5E-02 | 3  | 20.7 |
| O60506 | Heterogeneous nuclear ribonucleoprotein Q                             | 1.43 | 0.252 | 9.0E-02 | 4  | 5.6  |
| P15880 | 40S ribosomal protein S2                                              | 1.43 | 0.117 | 4.6E-03 | 5  | 21.2 |
| Q8NBJ5 | Procollagen galactosyltransferase 1                                   | 1.43 | NA    | NA      | 2  | 3.4  |
| P62280 | 40S ribosomal protein S11                                             | 1.42 | 0.033 | 1.3E-02 | 3  | 16.5 |
| P08236 | Beta-glucuronidase                                                    | 1.42 | NA    | NA      | 2  | 4.0  |
| Q86U42 | Polyadenylate-binding protein 2                                       | 1.42 | 0.561 | 3.5E-01 | 3  | 8.8  |
| P02774 | Vitamin D-binding protein                                             | 1.42 | 0.107 | 5.0E-02 | 5  | 8.2  |
| P35232 | Prohibitin                                                            | 1.42 | 0.048 | 7.5E-06 | 9  | 34.6 |
| Q86VP6 | Cullin-associated NEDD8-dissociated protein 1                         | 1.41 | 0.252 | 1.6E-01 | 4  | 2.9  |
| P52272 | Heterogeneous nuclear ribonucleoprotein M                             | 1.41 | 0.084 | 3.1E-03 | 13 | 19.0 |
| P14314 | Glucosidase 2 subunit beta                                            | 1.41 | 0.182 | 1.1E-02 | 8  | 12.1 |
| Q99623 | Prohibitin-2                                                          | 1.41 | 0.055 | 2.7E-02 | 7  | 24.7 |
| P11137 | Microtubule-associated protein 2                                      | 1.41 | NA    | NA      | 2  | 1.1  |
| Q6UVK1 | Chondroitin sulfate proteoglycan 4                                    | 1.40 | 0.148 | 2.3E-01 | 3  | 2.2  |
| O75367 | Core histone macro-H2A.1                                              | 1.40 | 0.119 | 7.7E-03 | 9  | 24.7 |
| P09211 | Glutathione S-transferase P                                           | 1.40 | 0.347 | 4.4E-01 | 7  | 39.0 |
| Q02978 | Mitochondrial 2-oxoglutarate/malate carrier protein                   | 1.40 | NA    | NA      | 2  | 5.4  |
| P01859 | Ig gamma-2 chain C region                                             | 1.40 | 0.251 | 3.3E-01 | 3  | 12.0 |
| Q7KZF4 | Staphylococcal nuclease domain-containing protein 1                   | 1.40 | NA    | NA      | 2  | 2.7  |
| Q9BWM7 | Sideroflexin-3                                                        | 1.40 | NA    | NA      | 2  | 8.3  |
| P17931 | Galectin-3                                                            | 1.39 | 0.050 | 5.8E-06 | 6  | 28.4 |
| P61769 | Beta-2-microglobulin                                                  | 1.39 | NA    | NA      | 2  | 16.8 |
| O00231 | 26S proteasome non-ATPase regulatory subunit 11                       | 1.39 | NA    | NA      | 2  | 4.5  |
| O75352 | Mannose-P-dolichol utilization defect 1 protein                       | 1.38 | NA    | NA      | 2  | 6.1  |
| P62820 | Ras-related protein Rab-1A                                            | 1.38 | NA    | NA      | 2  | 11.7 |
| O14773 | Tripeptidyl-peptidase 1                                               | 1.38 | 0.029 | 9.8E-07 | 4  | 8.7  |
| P06576 | ATP synthase subunit beta, mitochondrial                              | 1.38 | 0.049 | 1.6E-06 | 17 | 35.9 |
| P55084 | Trifunctional enzyme subunit beta, mitochondrial                      | 1.38 | 0.040 | 5.7E-06 | 11 | 19.4 |
| P50914 | 60S ribosomal protein L14                                             | 1.37 | NA    | NA      | 2  | 10.7 |
| Q8N5K1 | CDGSH iron-sulfur domain-containing protein 2                         | 1.37 | 0.144 | 1.9E-01 | 4  | 31.9 |
| Q15907 | Ras-related protein Rab-11B                                           | 1.37 | NA    | NA      | 2  | 8.7  |
| P09874 | Poly [ADP-ribose] polymerase 1                                        | 1.37 | 0.283 | 1.6E-01 | 5  | 5.2  |
| P50225 | Sulfotransferase 1A1                                                  | 1.37 | NA    | NA      | 2  | 7.1  |
| Q9BUJ2 | Heterogeneous nuclear ribonucleoprotein U-like protein 1              | 1.36 | NA    | NA      | 2  | 3.4  |
| Q8NBS9 | Thioredoxin domain-containing protein 5                               | 1.36 | 0.087 | 7.2E-02 | 6  | 14.8 |
| P19971 | Thymidine phosphorylase                                               | 1.36 | 0.243 | 2.6E-01 | 6  | 16.2 |
| P62277 | 40S ribosomal protein S13                                             | 1.36 | 0.246 | 8.4E-02 | 5  | 24.5 |
| Q15717 | ELAV-like protein 1                                                   | 1.36 | NA    | NA      | 2  | 7.7  |
| Q12904 | Aminoacyl tRNA synthase complex-interacting multifunctional protein 1 | 1.36 | NA    | NA      | 2  | 9.6  |
| P50454 | Serpin H1                                                             | 1.35 | 0.100 | 5.5E-02 | 5  | 13.2 |
| P41091 | Eukaryotic translation initiation factor 2 subunit 3                  | 1.35 | NA    | NA      | 2  | 6.1  |
| P48735 | Isocitrate dehydrogenase [NADP], mitochondrial                        | 1.35 | 0.217 | 9.4E-02 | 8  | 18.6 |
| P49189 | 4-trimethylaminobutylaldehyde dehydrogenase                           | 1.34 | NA    | NA      | 2  | 3.6  |
| Q96KP4 | Cytosolic non-specific dipeptidase                                    | 1.34 | 0.112 | 1.0E-01 | 5  | 13.1 |
| P30740 | Leukocyte elastase inhibitor                                          | 1.34 | 0.092 | 7.3E-02 | 4  | 12.1 |
| Q14677 | Claathrin interactor 1                                                | 1.34 | 0.839 | 5.7E-01 | 3  | 6.6  |
| Q96PK6 | RNA-binding protein 14                                                | 1.34 | NA    | NA      | 2  | 3.4  |
| P54136 | Arginine-tRNA ligase, cytoplasmic                                     | 1.34 | 0.207 | 7.5E-02 | 4  | 6.7  |
| P62318 | Small nuclear ribonucleoprotein Sm D3                                 | 1.33 | NA    | NA      | 2  | 15.1 |
| Q99714 | 3-hydroxyacyl-CoA dehydrogenase type-2                                | 1.33 | 0.147 | 1.4E-01 | 3  | 11.5 |
| P0CW22 | 40S ribosomal protein S17-like                                        | 1.33 | 0.116 | 2.0E-01 | 3  | 16.3 |
| Q15459 | Splicing factor 3A subunit 1                                          | 1.33 | NA    | NA      | 2  | 2.4  |
| P51810 | G-protein coupled receptor 143                                        | 1.33 | NA    | NA      | 2  | 5.7  |
| Q9Y6C9 | Mitochondrial carrier homolog 2                                       | 1.33 | 0.106 | 1.1E-01 | 4  | 19.5 |
| P62917 | 60S ribosomal protein L8                                              | 1.33 | NA    | NA      | 2  | 10.5 |
| Q14247 | Src substrate cortactin                                               | 1.32 | 0.095 | 4.1E-01 | 5  | 11.8 |
| O75947 | ATP synthase subunit d, mitochondrial                                 | 1.32 | 0.101 | 2.2E-02 | 8  | 44.7 |
| P36543 | V-type proton ATPase subunit E 1                                      | 1.32 | NA    | NA      | 2  | 7.1  |
| P01009 | Alpha-1-antitrypsin                                                   | 1.31 | 0.109 | 3.5E-02 | 14 | 32.5 |
| P49748 | Very long-chain specific acyl-CoA dehydrogenase, mitochondrial        | 1.31 | 0.118 | 3.7E-02 | 8  | 13.4 |
| P23368 | NAD-dependent malic enzyme, mitochondrial                             | 1.31 | NA    | NA      | 2  | 2.4  |
| P48047 | ATP synthase subunit O, mitochondrial                                 | 1.31 | 0.061 | 7.6E-03 | 4  | 25.4 |
| Q95831 | Apoptosis-inducing factor 1, mitochondrial                            | 1.31 | NA    | NA      | 2  | 5.2  |
| P06730 | Eukaryotic translation initiation factor 4E                           | 1.30 | 0.763 | 6.1E-01 | 3  | 14.7 |
| P18124 | 60S ribosomal protein L7                                              | 1.30 | 0.123 | 3.3E-02 | 7  | 24.6 |
| P52907 | F-actin-capping protein subunit alpha-1                               | 1.30 | NA    | NA      | 2  | 13.3 |
| P62987 | Ubiquitin-60S ribosomal protein L40                                   | 1.30 | 0.089 | 6.4E-02 | 9  | 50.8 |
| P62913 | 60S ribosomal protein L11                                             | 1.29 | NA    | NA      | 2  | 11.8 |
| Q9NSE4 | Isoleucine-tRNA ligase, mitochondrial                                 | 1.29 | 0.161 | 1.5E-01 | 4  | 4.9  |
| Q8NB37 | Parkinson disease 7 domain-containing protein 1                       | 1.29 | NA    | NA      | 2  | 13.6 |
| Q9UJU6 | Drebrin-like protein                                                  | 1.29 | NA    | NA      | 2  | 6.0  |
| Q9Y3Z3 | Deoxynucleoside triphosphate triphosphohydrolase SAMHD1               | 1.29 | 0.171 | 1.2E-01 | 3  | 5.3  |
| P49591 | Serine-tRNA ligase, cytoplasmic                                       | 1.28 | 0.086 | 4.9E-02 | 4  | 8.6  |
| O43809 | Cleavage and polyadenylation specificity factor subunit 5             | 1.28 | NA    | NA      | 2  | 10.6 |
| Q16891 | Mitochondrial inner membrane protein                                  | 1.28 | 0.108 | 2.7E-02 | 12 | 20.3 |
| O75396 | Vesicle-trafficking protein SEC22b                                    | 1.28 | 0.103 | 3.7E-02 | 3  | 18.1 |

Table S4-Sample UM28

|        |                                                                                                                   |      |         |         |    |      |
|--------|-------------------------------------------------------------------------------------------------------------------|------|---------|---------|----|------|
| P46778 | 60S ribosomal protein L21                                                                                         | 1.27 | NA      | NA      | 2  | 13.8 |
| P67936 | Tropomyosin alpha-4 chain                                                                                         | 1.27 | 0.226   | 8.8E-02 | 10 | 33.9 |
| Q07960 | Rho GTPase-activating protein 1                                                                                   | 1.27 | NA      | NA      | 2  | 5.5  |
| Q13596 | Sorting nexin-1                                                                                                   | 1.27 | NA      | NA      | 2  | 5.2  |
| Q02543 | 60S ribosomal protein L18a                                                                                        | 1.26 | 1.319   | 5.6E-01 | 3  | 17.6 |
| P62269 | 40S ribosomal protein S18                                                                                         | 1.26 | 0.024   | 1.3E-02 | 5  | 28.3 |
| Q9Y3U8 | 60S ribosomal protein L36                                                                                         | 1.26 | 0.128   | 9.7E-02 | 4  | 30.5 |
| Q07000 | HLA class I histocompatibility antigen, Cw-15 alpha chain                                                         | 1.25 | NA      | NA      | 2  | 9.6  |
| P45880 | Voltage-dependent anion-selective channel protein 2                                                               | 1.25 | 0.075   | 2.1E-02 | 7  | 24.5 |
| P80303 | Nucleobindin-2                                                                                                    | 1.25 | NA      | NA      | 2  | 6.0  |
| Q00151 | PDZ and LIM domain protein 1                                                                                      | 1.25 | 0.159   | 2.2E-01 | 3  | 10.0 |
| P40939 | Trifunctional enzyme subunit alpha, mitochondrial                                                                 | 1.24 | 0.263   | 2.1E-01 | 16 | 24.1 |
| A1L070 | Acetolactate synthase-like protein                                                                                | 1.24 | 0.073   | 1.9E-01 | 3  | 5.5  |
| P59998 | Actin-related protein 2/3 complex subunit 4                                                                       | 1.24 | 0.116   | 1.2E-01 | 3  | 16.1 |
| O75643 | U5 small nuclear ribonucleoprotein 200 kDa helicase                                                               | 1.24 | NA      | NA      | 2  | 0.9  |
| O15144 | Actin-related protein 2/3 complex subunit 2                                                                       | 1.24 | 0.099   | 8.8E-02 | 5  | 14.3 |
| Q15233 | Non-POU domain-containing octamer-binding protein                                                                 | 1.24 | 0.155   | 3.6E-01 | 6  | 13.6 |
| Q15582 | Transforming growth factor-beta-induced protein ig-h3                                                             | 1.24 | 0.061   | 7.8E-03 | 9  | 15.5 |
| P25705 | ATP synthase subunit alpha, mitochondrial                                                                         | 1.23 | 0.106   | 1.8E-02 | 20 | 39.1 |
| P78344 | Eukaryotic translation initiation factor 4 gamma 2                                                                | 1.23 | NA      | NA      | 2  | 1.5  |
| P11940 | Polyadenylate-binding protein 1                                                                                   | 1.23 | 0.076   | 9.0E-03 | 7  | 13.8 |
| P46459 | Vesicle-fusing ATPase                                                                                             | 1.21 | 0.192   | 2.8E-01 | 5  | 7.3  |
| P07858 | Cathepsin B                                                                                                       | 1.21 | 0.075   | 4.0E-01 | 4  | 13.6 |
| P14868 | Aspartate--tRNA ligase, cytoplasmic                                                                               | 1.21 | 0.038   | 1.9E-02 | 3  | 8.4  |
| Q9Y2W1 | Thyroid hormone receptor-associated protein 3                                                                     | 1.21 | NA      | NA      | 2  | 2.7  |
| Q9Y512 | Sorting and assembly machinery component 50 homolog                                                               | 1.21 | NA      | NA      | 2  | 4.7  |
| Q15005 | Signal peptidase complex subunit 2                                                                                | 1.21 | NA      | NA      | 2  | 12.8 |
| Q99584 | Protein S100-A13                                                                                                  | 1.20 | 0.195   | 2.2E-01 | 3  | 22.4 |
| Q13011 | Delta(3,5)-Delta(2,4)-dienoyl-CoA isomerase, mitochondrial                                                        | 1.20 | 0.180   | 1.5E-01 | 3  | 7.6  |
| Q9BR76 | Coronin-1B                                                                                                        | 1.20 | NA      | NA      | 2  | 3.5  |
| Q14157 | Ubiquitin-associated protein 2-like                                                                               | 1.20 | NA      | NA      | 2  | 2.5  |
| P14927 | Cytochrome b-c1 complex subunit 7                                                                                 | 1.20 | 0.407   | 3.6E-01 | 3  | 27.0 |
| P61353 | 60S ribosomal protein L27                                                                                         | 1.19 | 0.990   | 2.7E-01 | 4  | 31.6 |
| P22695 | Cytochrome b-c1 complex subunit 2, mitochondrial                                                                  | 1.18 | 0.294   | 1.4E-01 | 5  | 17.4 |
| P26885 | Peptidyl-prolyl cis-trans isomerase FKBP2                                                                         | 1.18 | NA      | NA      | 2  | 9.2  |
| P36542 | ATP synthase subunit gamma, mitochondrial                                                                         | 1.18 | 0.195   | 3.5E-01 | 3  | 11.1 |
| P27816 | Microtubule-associated protein 4                                                                                  | 1.18 | 0.844   | 3.3E-01 | 7  | 8.3  |
| P49458 | Signal recognition particle 9 kDa protein                                                                         | 1.18 | 0.169   | 5.1E-01 | 3  | 34.9 |
| Q09028 | Histone-binding protein RBBP4                                                                                     | 1.18 | 0.218   | 3.9E-01 | 3  | 5.4  |
| Q96AY3 | Peptidyl-prolyl cis-trans isomerase FKBP10                                                                        | 1.18 | NA      | NA      | 2  | 3.6  |
| P22307 | Non-specific lipid-transfer protein                                                                               | 1.17 | 0.140   | 2.6E-01 | 4  | 6.2  |
| Q15063 | Periostin                                                                                                         | 1.17 | NA      | NA      | 2  | 4.1  |
| O75533 | Splicing factor 3B subunit 1                                                                                      | 1.17 | 0.368   | 7.1E-01 | 4  | 3.8  |
| P10644 | cAMP-dependent protein kinase type I-alpha regulatory subunit                                                     | 1.17 | 0.199   | 2.4E-01 | 5  | 13.4 |
| Q9UPN3 | Microtubule-actin cross-linking factor 1, isoforms 1/2/3/5                                                        | 1.16 | NA      | NA      | 2  | 0.4  |
| P32969 | 60S ribosomal protein L9                                                                                          | 1.16 | NA      | NA      | 2  | 5.7  |
| P51970 | NADH dehydrogenase [ubiquinone] 1 alpha subcomplex subunit 8                                                      | 1.15 | NA      | NA      | 2  | 7.6  |
| Q00325 | Phosphate carrier protein, mitochondrial                                                                          | 1.15 | 0.099   | 2.3E-01 | 8  | 21.3 |
| P11387 | DNA topoisomerase 1                                                                                               | 1.15 | NA      | NA      | 2  | 2.1  |
| Q00765 | Receptor expression-enhancing protein 5                                                                           | 1.14 | NA      | NA      | 2  | 10.1 |
| Q12913 | Receptor-type tyrosine-protein phosphatase eta                                                                    | 1.14 | NA      | NA      | 2  | 1.9  |
| O00487 | 26S proteasome non-ATPase regulatory subunit 14                                                                   | 1.14 | NA      | NA      | 2  | 6.5  |
| P46926 | Glucosamine-6-phosphate isomerase 1                                                                               | 1.14 | NA      | NA      | 2  | 5.9  |
| O75380 | NADH dehydrogenase [ubiquinone] iron-sulfur protein 6, mitochondrial                                              | 1.14 | NA      | NA      | 2  | 20.2 |
| Q04637 | Eukaryotic translation initiation factor 4 gamma 1                                                                | 1.14 | NA      | NA      | 2  | 1.0  |
| P50213 | Isocitrate dehydrogenase [NAD] subunit alpha, mitochondrial                                                       | 1.13 | 0.132   | 1.9E-01 | 3  | 10.1 |
| Q5VTE0 | Putative elongation factor 1-alpha-like 3                                                                         | 1.13 | NA      | NA      | 2  | 4.1  |
| Q14165 | Malectin                                                                                                          | 1.13 | NA      | NA      | 2  | 9.2  |
| Q06830 | Peroxioredoxin-1                                                                                                  | 1.13 | 0.147   | 2.1E-01 | 8  | 47.7 |
| P11021 | 78 kDa glucose-regulated protein                                                                                  | 1.13 | 0.064   | 5.7E-02 | 25 | 38.5 |
| P30519 | Heme oxygenase 2                                                                                                  | 1.13 | NA      | NA      | 2  | 7.0  |
| P30041 | Peroxioredoxin-6                                                                                                  | 1.12 | 0.098   | 6.6E-02 | 9  | 37.9 |
| Q05682 | Caldesmon                                                                                                         | 1.12 | 0.243   | 3.6E-01 | 7  | 11.5 |
| Q6P2Q9 | Pre-mRNA-processing-splicing factor 8                                                                             | 1.12 | 0.548   | 4.8E-01 | 5  | 2.2  |
| P38606 | V-type proton ATPase catalytic subunit A                                                                          | 1.12 | 1.724   | 3.5E-01 | 5  | 8.8  |
| P01023 | Alpha-2-macroglobulin                                                                                             | 1.12 | 41.257  | 3.6E-01 | 9  | 8.5  |
| P43307 | Translocon-associated protein subunit alpha                                                                       | 1.12 | NA      | NA      | 2  | 6.6  |
| P09382 | Galectin-1                                                                                                        | 1.12 | 0.075   | 1.3E-01 | 5  | 43.7 |
| O95881 | Thioredoxin domain-containing protein 12                                                                          | 1.11 | NA      | NA      | 2  | 14.0 |
| P00734 | Prothrombin                                                                                                       | 1.11 | NA      | NA      | 2  | 4.0  |
| P53618 | Coatomer subunit beta                                                                                             | 1.11 | 1.352   | 5.1E-01 | 4  | 5.5  |
| Q9NV59 | Pyridoxine-5'-phosphate oxidase                                                                                   | 1.11 | NA      | NA      | 2  | 13.0 |
| Q9Y262 | Eukaryotic translation initiation factor 3 subunit L                                                              | 1.11 | 0.220   | 6.3E-01 | 5  | 8.3  |
| Q13547 | Histone deacetylase 1                                                                                             | 1.11 | 0.454   | 8.5E-01 | 3  | 6.0  |
| P23396 | 40S ribosomal protein S3                                                                                          | 1.11 | 0.119   | 3.0E-01 | 10 | 43.2 |
| P61758 | Prefoldin subunit 3                                                                                               | 1.10 | NA      | NA      | 2  | 8.6  |
| P02452 | Collagen alpha-1(I) chain                                                                                         | 1.10 | 4.760   | 9.0E-01 | 4  | 3.9  |
| Q16531 | DNA damage-binding protein 1                                                                                      | 1.10 | 1.060   | 6.6E-01 | 4  | 3.4  |
| Q14980 | Nuclear mitotic apparatus protein 1                                                                               | 1.09 | 0.689   | 6.3E-01 | 8  | 5.0  |
| P11586 | C-1-tetrahydrofolate synthase, cytoplasmic                                                                        | 1.09 | 0.260   | 4.9E-01 | 5  | 4.9  |
| P10515 | Dihydropyridyllysine-residue acetyltransferase component of pyruvate dehydrogenase complex, mitochondrial         | 1.09 | 0.041   | 1.2E-01 | 6  | 9.0  |
| P78371 | T-complex protein 1 subunit beta                                                                                  | 1.09 | NA      | NA      | 2  | 4.3  |
| P11216 | Glycogen phosphorylase, brain form                                                                                | 1.09 | 0.390   | 2.8E-01 | 7  | 10.4 |
| P13674 | Prolyl 4-hydroxylase subunit alpha-1                                                                              | 1.09 | 0.319   | 7.7E-01 | 3  | 7.3  |
| O00560 | Syntenin-1                                                                                                        | 1.08 | 0.331   | 7.8E-01 | 3  | 13.4 |
| Q8N1G4 | Leucine-rich repeat-containing protein 47                                                                         | 1.07 | NA      | NA      | 2  | 4.6  |
| O43837 | Isocitrate dehydrogenase [NAD] subunit beta, mitochondrial                                                        | 1.07 | NA      | NA      | 2  | 5.5  |
| P36957 | Dihydropyridyllysine-residue succinyltransferase component of 2-oxoglutarate dehydrogenase complex, mitochondrial | 1.07 | 1.425   | 7.0E-01 | 6  | 14.8 |
| P02461 | Collagen alpha-1(III) chain                                                                                       | 1.06 | 0.858   | 5.9E-01 | 3  | 2.9  |
| P46781 | 40S ribosomal protein S9                                                                                          | 1.06 | 0.172   | 6.6E-01 | 7  | 23.2 |
| P50402 | Emerin                                                                                                            | 1.06 | NA      | NA      | 2  | 9.8  |
| Q16851 | UTP--glucose-1-phosphate uridylyltransferase                                                                      | 1.06 | NA      | NA      | 2  | 4.5  |
| P30153 | Serine/threonine-protein phosphatase 2A 65 kDa regulatory subunit A alpha isoform                                 | 1.06 | NA      | NA      | 2  | 3.6  |
| Q9NZ08 | Endoplasmic reticulum aminopeptidase 1                                                                            | 1.06 | 0.848   | 8.2E-01 | 3  | 3.2  |
| P16435 | NADPH--cytochrome P450 reductase                                                                                  | 1.05 | 0.186   | 5.8E-01 | 3  | 5.5  |
| P61158 | Actin-related protein 3                                                                                           | 1.05 | 0.269   | 5.1E-01 | 7  | 22.7 |
| P62753 | 40S ribosomal protein S6                                                                                          | 1.05 | 0.143   | 7.5E-01 | 3  | 14.1 |
| P09496 | Claathrin light chain A                                                                                           | 1.05 | 0.474   | 8.4E-01 | 3  | 8.9  |
| Q9UNH7 | Sorting nexin-6                                                                                                   | 1.05 | NA      | NA      | 2  | 3.2  |
| P11177 | Pyruvate dehydrogenase E1 component subunit beta, mitochondrial                                                   | 1.05 | 0.282   | 7.5E-01 | 3  | 8.6  |
| Q16270 | Insulin-like growth factor-binding protein 7                                                                      | 1.05 | NA      | NA      | 2  | 10.6 |
| Q13283 | Ras GTPase-activating protein-binding protein 1                                                                   | 1.05 | NA      | NA      | 2  | 7.3  |
| B5ME19 | Eukaryotic translation initiation factor 3 subunit C-like protein                                                 | 1.04 | 0.200   | 8.0E-01 | 4  | 4.7  |
| P21266 | Glutathione S-transferase Mu 3                                                                                    | 1.04 | 0.400   | 6.6E-01 | 3  | 13.8 |
| Q9HC38 | Glyoxalase domain-containing protein 4                                                                            | 1.04 | 0.863   | 9.5E-01 | 3  | 9.6  |
| Q13200 | 26S proteasome non-ATPase regulatory subunit 2                                                                    | 1.03 | 0.258   | 7.0E-01 | 3  | 4.4  |
| O95292 | Vesicle-associated membrane protein-associated protein B/C                                                        | 1.03 | 1.383   | 8.7E-01 | 4  | 21.0 |
| P31930 | Cytochrome b-c1 complex subunit 1, mitochondrial                                                                  | 1.03 | 0.084   | 6.4E-01 | 5  | 14.8 |
| Q02218 | 2-oxoglutarate dehydrogenase, mitochondrial                                                                       | 1.02 | 149.065 | 8.2E-01 | 10 | 10.6 |
| Q6NUM9 | All-trans-retinol 13,14-reductase                                                                                 | 1.02 | NA      | NA      | 2  | 4.3  |
| P49721 | Proteasome subunit beta type-2                                                                                    | 1.02 | NA      | NA      | 2  | 13.4 |
| P62244 | 40S ribosomal protein S15a                                                                                        | 1.02 | 0.050   | 6.1E-01 | 3  | 18.5 |
| P09497 | Claathrin light chain B                                                                                           | 1.02 | NA      | NA      | 2  | 7.4  |
| P61160 | Actin-related protein 2                                                                                           | 1.02 | 0.393   | 8.6E-01 | 4  | 14.2 |
| Q14697 | Neutral alpha-glucosidase AB                                                                                      | 1.02 | 3.619   | 8.5E-01 | 14 | 15.1 |

Table S4-Sample UM28

|        |                                                                              |      |        |         |    |      |
|--------|------------------------------------------------------------------------------|------|--------|---------|----|------|
| Q9Y6M9 | NADH dehydrogenase [ubiquinone] 1 beta subcomplex subunit 9                  | 1.01 | NA     | NA      | 2  | 15.6 |
| P13667 | Protein disulfide-isomerase A4                                               | 1.01 | 0.578  | 9.0E-01 | 9  | 13.3 |
| Q07065 | Cytoskeleton-associated protein 4                                            | 1.01 | 0.314  | 8.6E-01 | 8  | 17.1 |
| Q9NV70 | Exocyst complex component 1                                                  | 1.01 | NA     | NA      | 2  | 2.1  |
| O15143 | Actin-related protein 2/3 complex subunit 1B                                 | 1.01 | 0.716  | 9.2E-01 | 4  | 13.4 |
| P30626 | Sorcin                                                                       | 1.01 | NA     | NA      | 2  | 9.1  |
| Q16610 | Extracellular matrix protein 1                                               | 1.00 | 0.899  | 9.8E-01 | 4  | 8.9  |
| P40429 | 60S ribosomal protein L13a                                                   | 1.00 | 0.744  | 9.9E-01 | 4  | 14.8 |
| P31040 | Succinate dehydrogenase [ubiquinone] flavoprotein subunit, mitochondrial     | 1.00 | 0.170  | 9.6E-01 | 6  | 11.9 |
| P61421 | V-type proton ATPase subunit d 1                                             | 0.99 | 1.077  | 8.8E-01 | 3  | 7.7  |
| P20700 | Lamin-B1                                                                     | 0.98 | 11.582 | 9.0E-01 | 8  | 14.5 |
| P02647 | Apolipoprotein A-I                                                           | 0.98 | 0.594  | 8.4E-01 | 11 | 46.1 |
| P02545 | Prelamin-A/C                                                                 | 0.98 | 1.551  | 6.0E-01 | 37 | 51.4 |
| P14625 | Endoplasmic reticulum chaperone protein BiP                                  | 0.98 | 1.268  | 7.3E-01 | 18 | 22.4 |
| P35613 | Basigin                                                                      | 0.97 | 0.445  | 9.0E-01 | 3  | 12.7 |
| P07305 | Histone H1.0                                                                 | 0.97 | NA     | NA      | 2  | 10.8 |
| O60271 | C-Jun-amino-terminal kinase-interacting protein 4                            | 0.97 | NA     | NA      | 2  | 2.3  |
| P67870 | Casein kinase II subunit beta                                                | 0.96 | NA     | NA      | 2  | 10.2 |
| O00303 | Eukaryotic translation initiation factor 3 subunit F                         | 0.96 | NA     | NA      | 2  | 8.1  |
| P08134 | Rho-related GTP-binding protein RhoC                                         | 0.96 | 0.208  | 4.8E-01 | 3  | 10.4 |
| P50502 | Hsc70-interacting protein                                                    | 0.96 | 1.733  | 6.3E-01 | 3  | 6.5  |
| P51149 | Ras-related protein Rab-7a                                                   | 0.96 | 1.937  | 7.7E-01 | 4  | 18.8 |
| P21281 | V-type proton ATPase subunit B, brain isoform                                | 0.95 | 1.117  | 7.9E-01 | 5  | 12.3 |
| P63000 | Ras-related C3 botulinum toxin substrate 1                                   | 0.95 | 0.038  | 3.4E-01 | 4  | 24.5 |
| P53621 | Coatomer subunit alpha                                                       | 0.95 | 0.208  | 7.8E-01 | 7  | 6.9  |
| Q9P2R7 | Succinyl-CoA ligase [ADP-forming] subunit beta, mitochondrial                | 0.95 | 0.094  | 5.2E-01 | 3  | 5.8  |
| P21912 | Succinate dehydrogenase [ubiquinone] iron-sulfur subunit, mitochondrial      | 0.95 | 0.057  | 3.8E-01 | 5  | 18.9 |
| P60981 | Dextrin                                                                      | 0.95 | NA     | NA      | 2  | 10.3 |
| Q27J81 | Inverted formin-2                                                            | 0.94 | NA     | NA      | 2  | 1.8  |
| P26196 | Probable ATP-dependent RNA helicase DDX6                                     | 0.94 | NA     | NA      | 2  | 4.1  |
| P24752 | Acetyl-CoA acetyltransferase, mitochondrial                                  | 0.94 | 0.130  | 5.7E-01 | 3  | 4.9  |
| P26038 | Moesin                                                                       | 0.94 | 0.088  | 2.4E-01 | 9  | 15.3 |
| P0C0S8 | Histone H2A type 1                                                           | 0.93 | NA     | NA      | 2  | 25.4 |
| P01857 | Ig gamma-1 chain C region                                                    | 0.93 | 0.124  | 1.9E-01 | 6  | 31.5 |
| P54727 | UV excision repair protein RAD23 homolog B                                   | 0.93 | 0.410  | 6.2E-01 | 3  | 7.3  |
| P51572 | B-cell receptor-associated protein 31                                        | 0.92 | 0.366  | 3.3E-01 | 6  | 26.0 |
| P27708 | CAD protein                                                                  | 0.92 | 0.282  | 8.6E-01 | 5  | 2.4  |
| P29590 | Protein PML                                                                  | 0.92 | NA     | NA      | 2  | 2.7  |
| O75964 | ATP synthase subunit g, mitochondrial                                        | 0.92 | 0.115  | 2.2E-01 | 3  | 35.9 |
| P21964 | Catechol O-methyltransferase                                                 | 0.92 | NA     | NA      | 2  | 8.9  |
| Q9UHQ9 | NADH-cytochrome b5 reductase 1                                               | 0.92 | 0.155  | 3.7E-01 | 3  | 10.5 |
| Q15691 | Microtubule-associated protein RP/EB family member 1                         | 0.92 | 0.013  | 3.4E-02 | 3  | 12.7 |
| O75914 | Serine/threonine-protein kinase PAK 3                                        | 0.91 | NA     | NA      | 2  | 3.6  |
| P17655 | Calpain-2 catalytic subunit                                                  | 0.91 | 0.134  | 5.9E-01 | 6  | 6.1  |
| Q9P0J0 | NADH dehydrogenase [ubiquinone] 1 alpha subcomplex subunit 13                | 0.91 | NA     | NA      | 2  | 18.1 |
| P40227 | T-complex protein 1 subunit zeta                                             | 0.90 | 0.292  | 4.7E-01 | 5  | 11.1 |
| P61026 | Ras-related protein Rab-10                                                   | 0.90 | NA     | NA      | 2  | 9.5  |
| Q9UHD8 | Septin-9                                                                     | 0.90 | 0.118  | 3.5E-01 | 4  | 7.2  |
| Q99733 | Nucleosome assembly protein 1-like 4                                         | 0.90 | NA     | NA      | 2  | 6.1  |
| P49419 | Alpha-aminoadipic semialdehyde dehydrogenase                                 | 0.89 | NA     | NA      | 2  | 4.3  |
| Q9H223 | EH domain-containing protein 4                                               | 0.89 | 0.177  | 6.9E-01 | 3  | 5.7  |
| P35998 | 26S protease regulatory subunit 7                                            | 0.89 | 0.480  | 6.1E-01 | 3  | 8.5  |
| Q8NB77 | Sulfatase-modifying factor 2                                                 | 0.89 | NA     | NA      | 2  | 6.3  |
| Q01518 | Adenylyl cyclase-associated protein 1                                        | 0.89 | NA     | NA      | 2  | 5.1  |
| Q8WXH0 | Nesprin-2                                                                    | 0.89 | 5.420  | 6.6E-01 | 4  | 0.4  |
| O60313 | Dynamin-like 120 kDa protein, mitochondrial                                  | 0.89 | 0.222  | 6.4E-01 | 3  | 4.9  |
| P29966 | Myristoylated alanine-rich C-kinase substrate                                | 0.88 | 0.899  | 7.4E-01 | 3  | 13.0 |
| Q98829 | Copine-1                                                                     | 0.88 | NA     | NA      | 2  | 4.7  |
| P04179 | Superoxide dismutase [Mn], mitochondrial                                     | 0.88 | 0.484  | 4.0E-01 | 7  | 40.5 |
| Q3ZCQ8 | Mitochondrial import inner membrane translocase subunit TIM50                | 0.87 | NA     | NA      | 2  | 5.1  |
| P42765 | 3-ketoacyl-CoA thiolase, mitochondrial                                       | 0.87 | 0.036  | 3.1E-02 | 3  | 6.5  |
| Q16718 | NADH dehydrogenase [ubiquinone] 1 alpha subcomplex subunit 5                 | 0.85 | NA     | NA      | 2  | 22.4 |
| Q15149 | Plectin                                                                      | 0.85 | 0.064  | 6.3E-04 | 55 | 12.7 |
| Q13561 | Dynactin subunit 2                                                           | 0.84 | 0.190  | 3.9E-01 | 5  | 12.0 |
| Q14108 | Lysosome membrane protein 2                                                  | 0.83 | 0.145  | 2.1E-01 | 4  | 9.8  |
| Q93050 | V-type proton ATPase 116 kDa subunit a isoform 1                             | 0.83 | NA     | NA      | 2  | 2.0  |
| O94979 | Protein transport protein Sec31A                                             | 0.83 | 0.366  | 5.7E-01 | 3  | 3.3  |
| P10606 | Cytochrome c oxidase subunit 5B, mitochondrial                               | 0.83 | 0.082  | 9.1E-02 | 3  | 24.0 |
| P11279 | Lysosome-associated membrane glycoprotein 1                                  | 0.83 | NA     | NA      | 2  | 4.1  |
| P55209 | Nucleosome assembly protein 1-like 1                                         | 0.83 | NA     | NA      | 2  | 9.0  |
| P48643 | T-complex protein 1 subunit epsilon                                          | 0.83 | 0.152  | 4.9E-02 | 6  | 11.8 |
| P49368 | T-complex protein 1 subunit gamma                                            | 0.82 | 0.157  | 1.2E-01 | 6  | 11.7 |
| O75323 | Protein NipSnap homolog 2                                                    | 0.82 | NA     | NA      | 2  | 4.9  |
| Q9Y230 | RuvB-like 2                                                                  | 0.82 | 0.144  | 3.4E-01 | 3  | 8.6  |
| Q13228 | Selenium-binding protein 1                                                   | 0.82 | NA     | NA      | 2  | 3.6  |
| P00367 | Glutamate dehydrogenase 1, mitochondrial                                     | 0.82 | 0.074  | 4.0E-02 | 6  | 11.5 |
| Q99536 | Synaptic vesicle membrane protein VAT-1 homolog                              | 0.81 | 0.080  | 1.4E-02 | 12 | 41.5 |
| P47756 | F-actin-capping protein subunit beta                                         | 0.81 | 0.198  | 1.7E-01 | 3  | 11.6 |
| P11310 | Medium-chain specific acyl-CoA dehydrogenase, mitochondrial                  | 0.81 | NA     | NA      | 2  | 5.5  |
| P37235 | Hippocalcin-like protein 1                                                   | 0.80 | NA     | NA      | 2  | 9.3  |
| P13073 | Cytochrome c oxidase subunit 4 isoform 1, mitochondrial                      | 0.80 | 0.178  | 2.9E-01 | 4  | 26.0 |
| Q53GQ0 | Estradiol 17-beta-dehydrogenase 12                                           | 0.80 | NA     | NA      | 2  | 8.7  |
| Q92597 | Protein NDRG1                                                                | 0.79 | NA     | NA      | 2  | 7.6  |
| P07437 | Tubulin beta chain                                                           | 0.79 | NA     | NA      | 2  | 6.1  |
| P00505 | Aspartate aminotransferase, mitochondrial                                    | 0.79 | 0.057  | 2.3E-02 | 4  | 11.4 |
| P20674 | Cytochrome c oxidase subunit 5A, mitochondrial                               | 0.79 | 0.122  | 4.4E-01 | 3  | 20.0 |
| O00483 | NADH dehydrogenase [ubiquinone] 1 alpha subcomplex subunit 4                 | 0.78 | NA     | NA      | 2  | 22.2 |
| P31689 | DnaJ homolog subfamily A member 1                                            | 0.78 | 0.080  | 1.5E-01 | 3  | 6.8  |
| Q9Y310 | tRNA-splicing ligase RtcB homolog                                            | 0.78 | 0.077  | 8.5E-02 | 3  | 6.7  |
| P02042 | Hemoglobin subunit delta                                                     | 0.77 | 0.024  | 1.2E-02 | 3  | 30.6 |
| P39656 | Dolichyl-diphosphooligosaccharide-protein glycosyltransferase 48 kDa subunit | 0.77 | 0.277  | 3.7E-01 | 5  | 11.0 |
| Q12797 | Aspartyl/asparaginyl beta-hydroxylase                                        | 0.77 | 0.104  | 4.2E-02 | 8  | 10.0 |
| Q15075 | Early endosome antigen 1                                                     | 0.77 | NA     | NA      | 2  | 2.3  |
| Q14011 | Cold-inducible RNA-binding protein                                           | 0.77 | NA     | NA      | 2  | 14.5 |
| P50990 | T-complex protein 1 subunit theta                                            | 0.76 | 0.035  | 4.6E-04 | 6  | 8.9  |
| P42167 | Lamina-associated polypeptide 2, isoforms beta/gamma                         | 0.76 | 1.950  | 5.5E-01 | 3  | 7.3  |
| O95297 | Myelin protein zero-like protein 1                                           | 0.75 | NA     | NA      | 2  | 8.2  |
| P0CG05 | Ig lambda-2 chain C regions                                                  | 0.75 | 0.145  | 1.9E-01 | 3  | 46.2 |
| P0COL5 | Complement C4-B                                                              | 0.75 | 0.049  | 8.2E-03 | 7  | 3.5  |
| P68871 | Hemoglobin subunit beta                                                      | 0.74 | 0.079  | 3.7E-03 | 5  | 44.9 |
| O43707 | Alpha-actinin-4                                                              | 0.74 | 0.065  | 5.5E-04 | 18 | 22.2 |
| P57053 | Histone H2B type F-S                                                         | 0.74 | NA     | NA      | 2  | 7.9  |
| P53992 | Protein transport protein Sec24C                                             | 0.73 | 0.391  | 3.9E-01 | 3  | 2.7  |
| P17858 | ATP-dependent 6-phosphofructokinase, liver type                              | 0.73 | 0.085  | 5.6E-02 | 3  | 4.7  |
| O75340 | Programmed cell death protein 6                                              | 0.73 | 0.021  | 7.1E-04 | 3  | 15.2 |
| Q7L5N1 | COP9 signalosome complex subunit 6                                           | 0.73 | NA     | NA      | 2  | 6.7  |
| Q02880 | DNA topoisomerase 2-beta                                                     | 0.72 | NA     | NA      | 2  | 0.9  |
| P04632 | Calpain small subunit 1                                                      | 0.72 | 0.738  | 4.8E-01 | 3  | 8.6  |
| P01834 | Ig kappa chain C region                                                      | 0.71 | 0.232  | 1.6E-01 | 3  | 51.9 |
| P15311 | Ezrin                                                                        | 0.71 | NA     | NA      | 2  | 2.6  |
| Q9GZR7 | ATP-dependent RNA helicase DDX24                                             | 0.71 | 7.142  | 6.8E-01 | 5  | 5.6  |
| P55060 | Exportin-2                                                                   | 0.71 | 0.111  | 5.3E-02 | 3  | 3.1  |
| Q9Y265 | RuvB-like 1                                                                  | 0.70 | NA     | NA      | 2  | 4.8  |
| P07384 | Calpain-1 catalytic subunit                                                  | 0.70 | 0.112  | 6.0E-02 | 4  | 7.0  |
| Q9UQE7 | Structural maintenance of chromosomes protein 3                              | 0.70 | 0.229  | 2.5E-01 | 3  | 2.1  |

Table S4-Sample UM28

|        |                                                                             |      |       |         |    |      |
|--------|-----------------------------------------------------------------------------|------|-------|---------|----|------|
| Q9NZM1 | Myoferlin                                                                   | 0.69 | 0.067 | 9.1E-05 | 13 | 7.3  |
| P43304 | Glycerol-3-phosphate dehydrogenase, mitochondrial                           | 0.69 | 0.418 | 3.9E-01 | 3  | 4.3  |
| P12235 | ADP/ATP translocase 1                                                       | 0.69 | 0.030 | 6.7E-03 | 3  | 10.4 |
| Q75489 | NADH dehydrogenase [ubiquinone] iron-sulfur protein 3, mitochondrial        | 0.69 | 0.217 | 9.3E-02 | 3  | 14.0 |
| E9PAV3 | Nascent polypeptide-associated complex subunit alpha, muscle-specific form  | 0.69 | NA    | NA      | 2  | 0.7  |
| Q7Z6Z7 | E3 ubiquitin-protein ligase HUWE1                                           | 0.69 | NA    | NA      | 2  | 0.5  |
| P55072 | Transitional endoplasmic reticulum ATPase                                   | 0.69 | 0.049 | 1.3E-07 | 11 | 14.8 |
| Q9BS26 | Endoplasmic reticulum resident protein 44                                   | 0.69 | 0.036 | 1.4E-03 | 4  | 8.4  |
| Q969X5 | Endoplasmic reticulum-Golgi intermediate compartment protein 1              | 0.68 | NA    | NA      | 2  | 7.9  |
| Q99832 | T-complex protein 1 subunit eta                                             | 0.68 | 0.054 | 2.2E-04 | 5  | 10.1 |
| P69905 | Hemoglobin subunit alpha                                                    | 0.68 | 0.096 | 2.4E-03 | 5  | 41.5 |
| P54709 | Sodium/potassium-transporting ATPase subunit beta-3                         | 0.67 | 0.108 | 3.5E-03 | 8  | 32.6 |
| P06727 | Apolipoprotein A-IV                                                         | 0.67 | 0.128 | 1.1E-02 | 11 | 26.3 |
| P13861 | cAMP-dependent protein kinase type II-alpha regulatory subunit              | 0.66 | NA    | NA      | 2  | 5.9  |
| Q9HDC9 | Adipocyte plasma membrane-associated protein                                | 0.66 | NA    | NA      | 2  | 5.5  |
| Q9Y6N5 | Sulfide:quinone oxidoreductase, mitochondrial                               | 0.66 | 0.161 | 1.1E-01 | 4  | 9.6  |
| P01903 | HLA class II histocompatibility antigen, DR alpha chain                     | 0.66 | 0.126 | 3.3E-02 | 4  | 21.3 |
| P09936 | Ubiquitin carboxyl-terminal hydrolase isozyme L1                            | 0.66 | 0.879 | 3.4E-01 | 4  | 26.0 |
| P01876 | Ig alpha-1 chain C region                                                   | 0.65 | NA    | NA      | 2  | 4.5  |
| Q9C0E8 | Protein lunapark                                                            | 0.65 | NA    | NA      | 2  | 3.7  |
| P12110 | Collagen alpha-2(VI) chain                                                  | 0.65 | 0.085 | 8.2E-04 | 9  | 10.4 |
| P04843 | Dolichyl-diphosphooligosaccharide--protein glycosyltransferase subunit 1    | 0.64 | 0.045 | 7.7E-05 | 8  | 14.3 |
| P04216 | Thy-1 membrane glycoprotein                                                 | 0.64 | 0.086 | 1.8E-03 | 4  | 24.8 |
| P12111 | Collagen alpha-3(VI) chain                                                  | 0.64 | 0.030 | 2.2E-16 | 41 | 15.2 |
| Q14847 | LIM and SH3 domain protein 1                                                | 0.63 | 2.407 | 7.2E-01 | 3  | 12.3 |
| Q9NQC3 | Reticulon-4                                                                 | 0.63 | 0.035 | 1.0E-04 | 3  | 3.6  |
| Q75306 | NADH dehydrogenase [ubiquinone] iron-sulfur protein 2, mitochondrial        | 0.63 | NA    | NA      | 2  | 5.6  |
| P51812 | Ribosomal protein S6 kinase alpha-3                                         | 0.62 | NA    | NA      | 2  | 2.8  |
| Q00577 | Transcriptional activator protein Pur-alpha                                 | 0.62 | NA    | NA      | 2  | 9.9  |
| Q14204 | Cytoplasmic dynein 1 heavy chain 1                                          | 0.62 | 0.057 | 5.7E-05 | 27 | 6.3  |
| Q14203 | Dynactin subunit 1                                                          | 0.62 | NA    | NA      | 2  | 2.0  |
| Q01082 | Spectrin beta chain, non-erythrocytic 1                                     | 0.61 | 0.026 | 0.0E+00 | 66 | 33.1 |
| P28288 | ATP-binding cassette sub-family D member 3                                  | 0.61 | NA    | NA      | 2  | 3.8  |
| P12109 | Collagen alpha-1(VI) chain                                                  | 0.61 | 0.062 | 2.4E-05 | 11 | 11.1 |
| P31153 | S-adenosylmethionine synthase isoform type-2                                | 0.60 | NA    | NA      | 2  | 7.6  |
| P63261 | Actin, cytoplasmic 2                                                        | 0.60 | 0.047 | 1.6E-04 | 5  | 16.8 |
| Q14764 | Major vault protein                                                         | 0.60 | 0.084 | 2.5E-03 | 5  | 6.8  |
| P12814 | Alpha-actinin-1                                                             | 0.60 | 0.086 | 5.9E-05 | 12 | 18.5 |
| P49257 | Protein ERGIC-53                                                            | 0.59 | 0.057 | 8.0E-03 | 5  | 12.5 |
| P02751 | Fibronectin                                                                 | 0.59 | 0.141 | 7.4E-03 | 13 | 7.1  |
| Q75955 | Flotillin-1                                                                 | 0.59 | NA    | NA      | 2  | 5.9  |
| Q00264 | Membrane-associated progesterone receptor component 1                       | 0.59 | 0.080 | 1.7E-02 | 4  | 16.4 |
| Q6NUK1 | Calcium-binding mitochondrial carrier protein SCaMC-1                       | 0.59 | 0.104 | 3.2E-01 | 4  | 6.9  |
| P26583 | High mobility group protein B2                                              | 0.59 | NA    | NA      | 2  | 12.4 |
| Q75915 | PRA1 family protein 3                                                       | 0.59 | 0.086 | 1.3E-03 | 4  | 23.4 |
| P04792 | Heat shock protein beta-1                                                   | 0.59 | 0.052 | 8.2E-06 | 6  | 31.2 |
| P50995 | Annexin A11                                                                 | 0.59 | 0.043 | 4.0E-05 | 4  | 7.7  |
| P02652 | Apolipoprotein A-II                                                         | 0.58 | NA    | NA      | 2  | 17.0 |
| Q9BSJ8 | Extended synaptotagmin-1                                                    | 0.58 | 0.073 | 1.4E-02 | 4  | 4.1  |
| Q09666 | Neuroblast differentiation-associated protein AHNAK                         | 0.58 | 0.039 | 1.0E-05 | 58 | 8.8  |
| P08123 | Collagen alpha-2(I) chain                                                   | 0.57 | NA    | NA      | 2  | 2.4  |
| P54920 | Alpha-soluble NSF attachment protein                                        | 0.57 | NA    | NA      | 2  | 8.5  |
| P35611 | Alpha-adducin                                                               | 0.57 | NA    | NA      | 2  | 6.5  |
| Q99442 | Translocation protein SEC62                                                 | 0.57 | 0.190 | 2.7E-01 | 3  | 7.3  |
| P17987 | T-complex protein 1 subunit alpha                                           | 0.57 | NA    | NA      | 2  | 3.8  |
| P00403 | Cytochrome c oxidase subunit 2                                              | 0.57 | NA    | NA      | 2  | 7.5  |
| P62805 | Histone H4                                                                  | 0.56 | 0.046 | 1.0E-09 | 7  | 52.4 |
| Q12965 | Unconventional myosin-1e                                                    | 0.56 | NA    | NA      | 2  | 1.5  |
| P05107 | Integrin beta-2                                                             | 0.56 | 0.116 | 3.1E-02 | 3  | 4.2  |
| Q43242 | 26S proteasome non-ATPase regulatory subunit 3                              | 0.56 | NA    | NA      | 2  | 4.1  |
| P50570 | Dynamin-2                                                                   | 0.56 | 0.069 | 4.0E-03 | 3  | 3.0  |
| Q71D13 | Histone H3.2                                                                | 0.55 | 0.133 | 1.7E-03 | 3  | 19.1 |
| Q00610 | Ciathrin heavy chain 1                                                      | 0.55 | 0.051 | 4.9E-10 | 26 | 18.8 |
| Q9BQE3 | Tubulin alpha-1C chain                                                      | 0.55 | 0.110 | 1.1E-03 | 4  | 12.0 |
| Q9BRX8 | Redox-regulatory protein FAM213A                                            | 0.55 | NA    | NA      | 2  | 11.8 |
| Q15404 | Ras suppressor protein 1                                                    | 0.54 | NA    | NA      | 2  | 9.4  |
| Q60716 | Catenin delta-1                                                             | 0.54 | NA    | NA      | 2  | 2.8  |
| Q14344 | Guanine nucleotide-binding protein subunit alpha-13                         | 0.54 | 0.389 | 5.5E-01 | 3  | 9.3  |
| P02462 | Collagen alpha-1(VI) chain                                                  | 0.54 | 0.257 | 1.5E-01 | 4  | 3.1  |
| P01042 | Kininogen-1                                                                 | 0.54 | NA    | NA      | 2  | 4.2  |
| P0C0S5 | Histone H2A.Z                                                               | 0.54 | NA    | NA      | 2  | 18.8 |
| P08107 | Heat shock 70 kDa protein 1A/1B                                             | 0.54 | 0.049 | 1.2E-05 | 10 | 15.8 |
| Q43175 | D-3-phosphoglycerate dehydrogenase                                          | 0.53 | NA    | NA      | 2  | 5.1  |
| Q15019 | Septin-2                                                                    | 0.53 | 0.089 | 3.4E-02 | 5  | 22.4 |
| P07942 | Laminin subunit beta-1                                                      | 0.53 | 0.247 | 7.1E-02 | 3  | 1.7  |
| P32119 | Peroxiredoxin-2                                                             | 0.53 | 0.102 | 6.0E-04 | 5  | 16.7 |
| Q13813 | Spectrin alpha chain, non-erythrocytic 1                                    | 0.52 | 0.022 | 0.0E+00 | 93 | 40.2 |
| Q14950 | Myosin regulatory light chain 12B                                           | 0.52 | NA    | NA      | 2  | 12.2 |
| P00390 | Glutathione reductase, mitochondrial                                        | 0.51 | NA    | NA      | 2  | 6.3  |
| P35580 | Myosin-10                                                                   | 0.51 | 0.088 | 2.9E-05 | 13 | 8.6  |
| P16615 | Sarcoplasmic/endoplasmic reticulum calcium ATPase 2                         | 0.51 | 0.172 | 3.1E-03 | 6  | 5.5  |
| P09543 | 2',3'-cyclic-nucleotide 3'-phosphodiesterase                                | 0.50 | 0.302 | 5.4E-02 | 4  | 6.9  |
| Q01995 | Transgelin                                                                  | 0.50 | 0.074 | 5.5E-05 | 5  | 28.9 |
| Q16181 | Septin-7                                                                    | 0.50 | NA    | NA      | 2  | 4.8  |
| Q03252 | Lamin-B2                                                                    | 0.49 | 0.030 | 8.3E-12 | 11 | 17.0 |
| Q96HC4 | PDZ and LIM domain protein 5                                                | 0.49 | NA    | NA      | 2  | 3.5  |
| Q6DD88 | Atlastin-3                                                                  | 0.49 | NA    | NA      | 2  | 3.5  |
| P06737 | Glycogen phosphorylase, liver form                                          | 0.48 | NA    | NA      | 2  | 3.1  |
| Q9NZN4 | EH domain-containing protein 2                                              | 0.48 | 0.163 | 1.7E-02 | 3  | 5.2  |
| P47755 | F-actin-capping protein subunit alpha-2                                     | 0.48 | 0.218 | 3.1E-01 | 3  | 19.6 |
| Q16795 | NADH dehydrogenase [ubiquinone] 1 alpha subcomplex subunit 9, mitochondrial | 0.48 | NA    | NA      | 2  | 6.4  |
| Q8WUM4 | Programmed cell death 6-interacting protein                                 | 0.47 | NA    | NA      | 2  | 1.8  |
| P60660 | Myosin light polypeptide 6                                                  | 0.47 | 0.045 | 1.6E-11 | 8  | 58.3 |
| Q9Y490 | Talin-1                                                                     | 0.47 | 0.061 | 7.0E-13 | 29 | 15.5 |
| P06396 | Gelsolin                                                                    | 0.46 | 0.085 | 2.5E-05 | 15 | 23.3 |
| P68371 | Tubulin beta-4B chain                                                       | 0.46 | NA    | NA      | 2  | 7.2  |
| P00387 | NADH-cytochrome b5 reductase 3                                              | 0.45 | 0.073 | 2.4E-06 | 9  | 35.9 |
| P05091 | Aldehyde dehydrogenase, mitochondrial                                       | 0.45 | NA    | NA      | 2  | 3.7  |
| Q14254 | Flotillin-2                                                                 | 0.45 | NA    | NA      | 2  | 5.4  |
| P04217 | Alpha-1B-glycoprotein                                                       | 0.44 | NA    | NA      | 2  | 4.8  |
| Q75131 | Copine-3                                                                    | 0.44 | 0.066 | 1.0E-03 | 3  | 6.3  |
| P08133 | Annexin A6                                                                  | 0.44 | 0.028 | 0.0E+00 | 30 | 47.8 |
| P06756 | Integrin alpha-V                                                            | 0.44 | NA    | NA      | 2  | 1.4  |
| Q10567 | AP-1 complex subunit beta-1                                                 | 0.44 | 0.679 | 2.0E-01 | 5  | 4.8  |
| P35579 | Myosin-9                                                                    | 0.43 | 0.031 | 0.0E+00 | 61 | 30.0 |
| Q15836 | Vesicle-associated membrane protein 3                                       | 0.43 | NA    | NA      | 2  | 24.0 |
| P08603 | Complement factor H                                                         | 0.43 | 0.246 | 2.0E-01 | 3  | 2.4  |
| Q94905 | Erlin-2                                                                     | 0.43 | 0.243 | 5.2E-02 | 5  | 15.9 |
| P43121 | Cell surface glycoprotein MUC18                                             | 0.42 | 0.260 | 1.3E-01 | 4  | 8.5  |
| Q16563 | Synaptophysin-like protein 1                                                | 0.42 | NA    | NA      | 2  | 10.0 |
| Q9BZQ8 | Protein Niban                                                               | 0.42 | NA    | NA      | 2  | 2.2  |
| P00918 | Carbonic anhydrase 2                                                        | 0.42 | NA    | NA      | 2  | 10.8 |
| Q96HN2 | Putative adenosylhomocysteinase 3                                           | 0.42 | NA    | NA      | 2  | 3.6  |
| P01600 | Ig kappa chain V-I region Hau                                               | 0.41 | NA    | NA      | 2  | 22.2 |
| P18206 | Vinculin                                                                    | 0.41 | 0.055 | 7.3E-11 | 18 | 18.5 |

Table S4-Sample UM28

|        |                                                                      |      |       |         |    |      |
|--------|----------------------------------------------------------------------|------|-------|---------|----|------|
| Q01813 | ATP-dependent 6-phosphofructokinase, platelet type                   | 0.41 | NA    | NA      | 2  | 3.7  |
| P21333 | Filamin-A                                                            | 0.41 | 0.037 | 0.0E+00 | 54 | 26.7 |
| P08572 | Collagen alpha-2(IV) chain                                           | 0.41 | 0.132 | 2.9E-03 | 7  | 5.4  |
| P01024 | Complement C3                                                        | 0.41 | 0.151 | 3.0E-05 | 16 | 10.2 |
| O95782 | AP-2 complex subunit alpha-1                                         | 0.41 | NA    | NA      | 2  | 2.0  |
| P05023 | Sodium/potassium-transporting ATPase subunit alpha-1                 | 0.41 | 0.069 | 8.7E-09 | 15 | 17.3 |
| P05556 | Integrin beta-1                                                      | 0.40 | 0.053 | 2.1E-07 | 7  | 10.0 |
| P02686 | Myelin basic protein                                                 | 0.40 | NA    | NA      | 2  | 7.2  |
| O75369 | Filamin-B                                                            | 0.39 | 0.010 | 5.0E-03 | 5  | 3.4  |
| P05362 | Intercellular adhesion molecule 1                                    | 0.38 | NA    | NA      | 2  | 5.3  |
| Q5JWF2 | Guanine nucleotide-binding protein G(s) subunit alpha isoforms XLas  | 0.37 | 0.403 | 2.1E-01 | 4  | 5.3  |
| P08571 | Monocyte differentiation antigen CD14                                | 0.37 | NA    | NA      | 2  | 7.5  |
| P0DJ18 | Serum amyloid A-1 protein                                            | 0.34 | NA    | NA      | 2  | 29.5 |
| Q13425 | Beta-2-syntrophin                                                    | 0.33 | 0.203 | 1.1E-01 | 3  | 3.9  |
| Q14699 | Raftin                                                               | 0.32 | 0.271 | 2.0E-01 | 3  | 5.7  |
| Q13361 | Microfibrillar-associated protein 5                                  | 0.31 | NA    | NA      | 2  | 13.3 |
| Q6UXB8 | Peptidase inhibitor 16                                               | 0.31 | NA    | NA      | 2  | 4.3  |
| P14207 | Folate receptor beta                                                 | 0.31 | NA    | NA      | 2  | 7.1  |
| P16157 | Ankyrin-1                                                            | 0.30 | 0.606 | 1.9E-01 | 3  | 2.4  |
| Q9BXN1 | Asporin                                                              | 0.29 | NA    | NA      | 2  | 2.9  |
| P60201 | Myelin proteolipid protein                                           | 0.29 | NA    | NA      | 2  | 5.4  |
| Q8TEX9 | Importin-4                                                           | 0.29 | NA    | NA      | 2  | 1.7  |
| P13671 | Complement component C6                                              | 0.29 | NA    | NA      | 2  | 2.6  |
| P00167 | Cytochrome b5                                                        | 0.28 | 0.252 | 1.5E-01 | 3  | 35.8 |
| Q13509 | Tubulin beta-3 chain                                                 | 0.27 | NA    | NA      | 2  | 5.8  |
| O95865 | N(G),N(G)-dimethylarginine dimethylaminohydrolase 2                  | 0.27 | NA    | NA      | 2  | 8.4  |
| P06899 | Histone H2B type 1-J                                                 | 0.27 | NA    | NA      | 2  | 7.9  |
| P04040 | Catalase                                                             | 0.26 | NA    | NA      | 2  | 5.3  |
| P68366 | Tubulin alpha-4A chain                                               | 0.24 | NA    | NA      | 2  | 4.2  |
| Q14624 | Inter-alpha-trypsin inhibitor heavy chain H4                         | 0.23 | NA    | NA      | 2  | 1.8  |
| O14786 | Neuropilin-1                                                         | 0.23 | NA    | NA      | 2  | 3.5  |
| P24844 | Myosin regulatory light polypeptide 9                                | 0.23 | NA    | NA      | 2  | 12.2 |
| Q9HBL0 | Tensin-1                                                             | 0.23 | 0.170 | 1.4E-01 | 3  | 2.5  |
| Q13642 | Four and a half LIM domains protein 1                                | 0.23 | NA    | NA      | 2  | 5.6  |
| P02656 | Apolipoprotein C-III                                                 | 0.22 | NA    | NA      | 2  | 27.3 |
| P04196 | Histidine-rich glycoprotein                                          | 0.21 | NA    | NA      | 2  | 4.0  |
| Q08431 | Lactadherin                                                          | 0.21 | NA    | NA      | 2  | 4.9  |
| P43320 | Beta-crystallin B2                                                   | 0.20 | 0.060 | 1.8E-01 | 3  | 15.6 |
| P35222 | Catenin beta-1                                                       | 0.20 | NA    | NA      | 2  | 4.0  |
| P05787 | Keratin, type II cytoskeletal 8                                      | 0.19 | NA    | NA      | 2  | 3.3  |
| O94875 | Sorbin and SH3 domain-containing protein 2                           | 0.18 | NA    | NA      | 2  | 3.7  |
| P07360 | Complement component C8 gamma chain                                  | 0.18 | NA    | NA      | 2  | 18.3 |
| Q969G5 | Protein kinase C delta-binding protein                               | 0.17 | NA    | NA      | 2  | 7.7  |
| O14495 | Lipid phosphate phosphohydrolase 3                                   | 0.17 | NA    | NA      | 2  | 7.4  |
| Q8N5C1 | Protein FAM26E                                                       | 0.16 | NA    | NA      | 2  | 6.8  |
| P21246 | Pleiotrophin                                                         | 0.16 | NA    | NA      | 2  | 9.5  |
| Q03135 | Caveolin-1                                                           | 0.16 | NA    | NA      | 2  | 13.5 |
| Q6UWY5 | Olfactomedin-like protein 1                                          | 0.16 | NA    | NA      | 2  | 6.5  |
| Q9NRN5 | Olfactomedin-like protein 3                                          | 0.16 | NA    | NA      | 2  | 4.9  |
| P22105 | Tenascin-X                                                           | 0.15 | NA    | NA      | 2  | 0.4  |
| P58166 | Inhibin beta E chain                                                 | 0.14 | 0.364 | 8.5E-02 | 3  | 10.0 |
| Q2UY09 | Collagen alpha-1(XXVIII) chain                                       | 0.13 | NA    | NA      | 2  | 1.7  |
| Q9BS40 | Latexin                                                              | 0.13 | NA    | NA      | 2  | 12.2 |
| Q63ZY3 | KN motif and ankyrin repeat domain-containing protein 2              | 0.13 | NA    | NA      | 2  | 2.7  |
| Q14767 | Latent-transforming growth factor beta-binding protein 2             | 0.13 | NA    | NA      | 2  | 0.9  |
| P03973 | Antileukoproteinase                                                  | 0.12 | NA    | NA      | 2  | 15.9 |
| P61626 | Lysozyme C                                                           | 0.09 | NA    | NA      | 2  | 12.8 |
| Q9HCJ6 | Synaptic vesicle membrane protein VAT-1 homolog-like                 | 0.09 | NA    | NA      | 2  | 3.3  |
| Q92777 | Synapsin-2                                                           | 0.09 | NA    | NA      | 2  | 4.1  |
| Q14956 | Transmembrane glycoprotein NMB                                       | 0.08 | NA    | NA      | 2  | 2.6  |
| P17643 | 5,6-dihydroxyindole-2-carboxylic acid oxidase                        | 0.08 | NA    | NA      | 2  | 5.6  |
| P35556 | Fibrillin-2                                                          | 0.06 | NA    | NA      | 2  | 0.7  |
| P10745 | Retinol-binding protein 3                                            | 0.05 | NA    | NA      | 2  | 1.5  |
| P07099 | Epoxide hydrolase 1                                                  | 0.38 | 0.048 | 4.1E-09 | 6  | 12.3 |
| Q9Y6C2 | EMILIN-1                                                             | 0.38 | 0.119 | 4.9E-02 | 5  | 6.0  |
| P68032 | Actin, alpha cardiac muscle 1                                        | 0.38 | 0.192 | 7.5E-04 | 6  | 22.3 |
| P09493 | Tropomyosin alpha-1 chain                                            | 0.38 | 0.102 | 6.3E-07 | 5  | 12.0 |
| P04899 | Guanine nucleotide-binding protein G(i) subunit alpha-2              | 0.35 | 0.069 | 3.0E-07 | 6  | 19.4 |
| P00352 | Retinal dehydrogenase 1                                              | 0.35 | 0.155 | 1.5E-03 | 5  | 8.6  |
| P13987 | CD59 glycoprotein                                                    | 0.33 | 0.105 | 1.2E-02 | 3  | 23.4 |
| Q9UHG3 | Prenylcysteine oxidase 1                                             | 0.33 | 0.167 | 4.1E-02 | 3  | 5.7  |
| P00738 | Haptoglobin                                                          | 0.31 | 0.073 | 1.2E-06 | 7  | 18.0 |
| O00159 | Unconventional myosin-1c                                             | 0.31 | 0.067 | 2.8E-05 | 11 | 11.4 |
| Q16363 | Laminin subunit alpha-4                                              | 0.31 | 0.140 | 1.9E-03 | 5  | 3.7  |
| P98160 | Basement membrane-specific heparan sulfate proteoglycan core protein | 0.31 | 0.047 | 0.0E+00 | 31 | 9.0  |
| Q07954 | Prolow-density lipoprotein receptor-related protein 1                | 0.30 | 0.097 | 9.0E-06 | 10 | 3.1  |
| O15230 | Laminin subunit alpha-5                                              | 0.29 | 0.081 | 9.9E-07 | 12 | 4.3  |
| P02749 | Beta-2-glycoprotein 1                                                | 0.29 | 0.114 | 1.1E-07 | 5  | 20.6 |
| O00468 | Agrin                                                                | 0.27 | 0.168 | 1.8E-02 | 6  | 4.9  |
| P39060 | Collagen alpha-1(XVII) chain                                         | 0.26 | 0.125 | 5.2E-07 | 8  | 5.5  |
| P55268 | Laminin subunit beta-2                                               | 0.25 | 0.092 | 1.2E-07 | 13 | 8.6  |
| P01011 | Alpha-1-antichymotrypsin                                             | 0.25 | 0.089 | 2.6E-06 | 7  | 17.3 |
| P08294 | Extracellular superoxide dismutase [Cu-Zn]                           | 0.25 | 0.084 | 4.0E-06 | 4  | 20.0 |
| P11047 | Laminin subunit gamma-1                                              | 0.25 | 0.079 | 2.5E-07 | 15 | 9.2  |
| P07197 | Neurofilament medium polypeptide                                     | 0.25 | 0.255 | 2.1E-02 | 3  | 4.6  |
| O43301 | Heat shock 70 kDa protein 12A                                        | 0.25 | 0.128 | 2.7E-03 | 4  | 6.7  |
| Q9BTV4 | Transmembrane protein 43                                             | 0.24 | 0.097 | 7.0E-03 | 4  | 15.3 |
| P02679 | Fibrinogen gamma chain                                               | 0.24 | 0.220 | 3.2E-04 | 11 | 26.7 |
| P01008 | Antithrombin-III                                                     | 0.24 | 0.135 | 2.3E-04 | 6  | 14.7 |
| P00747 | Plasminogen                                                          | 0.24 | 0.080 | 4.7E-07 | 8  | 8.9  |
| P27105 | Erythrocyte band 7 integral membrane protein                         | 0.23 | 0.120 | 1.7E-03 | 6  | 20.1 |
| P14543 | Nidogen-1                                                            | 0.23 | 0.070 | 2.4E-07 | 9  | 8.3  |
| P02654 | Apolipoprotein C-I                                                   | 0.22 | 0.079 | 1.5E-04 | 3  | 24.1 |
| Q6NZI2 | Polymerase I and transcript release factor                           | 0.22 | 0.132 | 5.8E-04 | 6  | 19.2 |
| Q14112 | Nidogen-2                                                            | 0.22 | 0.071 | 3.4E-10 | 12 | 10.0 |
| P36269 | Gamma-glutamyltransferase 5                                          | 0.22 | 0.175 | 1.7E-03 | 4  | 8.7  |
| P07355 | Annexin A2                                                           | 0.21 | 0.036 | 0.0E+00 | 23 | 54.0 |
| P02511 | Alpha-crystallin B chain                                             | 0.20 | 0.128 | 4.5E-06 | 5  | 29.1 |
| P00450 | Ceruloplasmin                                                        | 0.20 | 0.165 | 1.5E-03 | 6  | 7.6  |
| Q16555 | Dihydropyrimidinase-related protein 2                                | 0.20 | 0.155 | 1.2E-06 | 9  | 19.2 |
| P02675 | Fibrinogen beta chain                                                | 0.19 | 0.110 | 3.5E-05 | 8  | 22.2 |
| Q05707 | Collagen alpha-1(XIV) chain                                          | 0.19 | 0.228 | 7.5E-05 | 10 | 6.0  |
| Q96CX2 | BTB/POZ domain-containing protein KCTD12                             | 0.19 | 0.189 | 1.7E-02 | 3  | 10.8 |
| P60903 | Protein S100-A10                                                     | 0.18 | 0.098 | 6.1E-08 | 4  | 35.1 |
| Q16853 | Membrane primary amine oxidase                                       | 0.17 | 0.262 | 3.0E-02 | 3  | 3.7  |
| Q02549 | Spectrin alpha chain, erythrocytic 1                                 | 0.17 | 0.234 | 7.1E-05 | 9  | 4.9  |
| O43491 | Band 4.1-like protein 2                                              | 0.17 | 0.216 | 7.1E-05 | 6  | 7.2  |
| P80723 | Brain acid soluble protein 1                                         | 0.17 | 0.176 | 1.1E-03 | 4  | 30.8 |
| P04083 | Annexin A1                                                           | 0.16 | 0.042 | 5.5E-12 | 12 | 35.0 |
| P02671 | Fibrinogen alpha chain                                               | 0.16 | 0.105 | 5.5E-07 | 9  | 11.5 |
| P02649 | Apolipoprotein E                                                     | 0.16 | 0.071 | 1.1E-11 | 13 | 44.8 |
| P11166 | Solute carrier family 2, facilitated glucose transporter member 1    | 0.16 | 0.197 | 1.9E-03 | 5  | 7.3  |
| Q9NY15 | Stabilin-1                                                           | 0.15 | 0.133 | 7.0E-05 | 3  | 1.2  |
| P05164 | Myeloperoxidase                                                      | 0.15 | 0.267 | 4.8E-02 | 4  | 7.1  |
| P04275 | von Willebrand factor                                                | 0.15 | 0.103 | 8.2E-09 | 12 | 4.7  |



Table S4-Sample UM28

|        |                                                          |      |       |         |    |      |
|--------|----------------------------------------------------------|------|-------|---------|----|------|
| P11277 | Spectrin beta chain, erythrocytic                        | 0.13 | 0.136 | 2.7E-03 | 7  | 4.9  |
| P05186 | Alkaline phosphatase, tissue-nonspecific isozyme         | 0.13 | 0.272 | 1.3E-03 | 3  | 6.9  |
| P51888 | Prolargin                                                | 0.13 | 0.128 | 1.2E-11 | 12 | 35.6 |
| Q02952 | A-kinase anchor protein 12                               | 0.13 | 0.191 | 2.2E-06 | 13 | 10.2 |
| P35749 | Myosin-11                                                | 0.13 | 0.071 | 0.0E+00 | 30 | 16.4 |
| P02730 | Band 3 anion transport protein                           | 0.12 | 0.153 | 2.5E-06 | 7  | 10.3 |
| P39059 | Collagen alpha-1(XV) chain                               | 0.12 | 0.205 | 1.1E-04 | 5  | 3.9  |
| Q14195 | Dihydropyrimidinase-related protein 3                    | 0.12 | 0.180 | 2.8E-04 | 8  | 22.8 |
| P15088 | Mast cell carboxypeptidase A                             | 0.12 | 0.302 | 1.1E-02 | 5  | 10.1 |
| Q13885 | Tubulin beta-2A chain                                    | 0.11 | 0.177 | 1.5E-04 | 3  | 8.1  |
| P35243 | Recoverin                                                | 0.11 | 0.437 | 1.8E-02 | 3  | 14.5 |
| P63211 | Guanine nucleotide-binding protein G(T) subunit gamma-T1 | 0.11 | 0.215 | 1.6E-05 | 3  | 20.3 |
| P02760 | Protein AMBP                                             | 0.11 | 0.198 | 4.5E-03 | 4  | 19.0 |
| P20774 | Mimecan                                                  | 0.11 | 0.177 | 8.8E-06 | 8  | 24.8 |
| P51884 | Lumican                                                  | 0.10 | 0.057 | 0.0E+00 | 11 | 35.5 |
| P21980 | Protein-glutamine gamma-glutamyltransferase 2            | 0.10 | 0.105 | 4.0E-13 | 15 | 23.0 |
| P01031 | Complement C5                                            | 0.10 | 0.186 | 1.2E-04 | 7  | 4.4  |
| P41219 | Peripherin                                               | 0.09 | 0.236 | 7.5E-05 | 10 | 20.6 |
| P35555 | Fibrillin-1                                              | 0.09 | 0.067 | 0.0E+00 | 42 | 18.2 |
| P01871 | Ig mu chain C region                                     | 0.09 | 0.231 | 9.9E-07 | 9  | 24.6 |
| P23946 | Chymase                                                  | 0.09 | 0.326 | 1.5E-02 | 3  | 16.6 |
| P07585 | Decorin                                                  | 0.09 | 0.159 | 7.4E-03 | 8  | 23.1 |
| P22352 | Glutathione peroxidase 3                                 | 0.09 | 0.088 | 1.4E-05 | 5  | 16.8 |
| P21810 | Biglycan                                                 | 0.09 | 0.076 | 8.9E-16 | 12 | 39.9 |
| P21926 | CD9 antigen                                              | 0.09 | 0.152 | 1.0E-05 | 3  | 9.6  |
| Q9BXM0 | Periaxin                                                 | 0.08 | 0.434 | 1.1E-02 | 5  | 3.5  |
| Q15661 | Tryptase alpha/beta-1                                    | 0.08 | 0.192 | 1.6E-08 | 6  | 21.8 |
| P10643 | Complement component C7                                  | 0.08 | 0.278 | 4.5E-03 | 4  | 5.6  |
| P22748 | Carbonic anhydrase 4                                     | 0.07 | 0.337 | 1.1E-03 | 7  | 20.8 |
| P02748 | Complement component C9                                  | 0.06 | 0.198 | 3.3E-07 | 9  | 17.7 |
| P10909 | Clusterin                                                | 0.06 | 0.091 | 0.0E+00 | 17 | 37.0 |
| P04004 | Vitronectin                                              | 0.05 | 0.143 | 3.8E-12 | 9  | 19.5 |
| P35625 | Metalloproteinase inhibitor 3                            | 0.04 | 0.176 | 4.4E-11 | 5  | 21.3 |
| P02743 | Serum amyloid P-component                                | 0.04 | 0.232 | 2.0E-06 | 5  | 22.0 |
| P25189 | Myelin protein P0                                        | 0.02 | 0.226 | 2.1E-06 | 7  | 28.2 |

Brown denotes change  $\geq 2$  standard deviations (SD) from the mean, yellow denotes change  $\geq 1$  SD and green highlights p values  $\leq 0.05$ . NA, not applicable, n<3 unique peptides.
