# Supplementary material for: iTRAQ Quantitative Proteomic Comparison of Metastatic and Non-Metastatic Uveal Melanoma Tumors
Source: PubMed Central journal article supplement (PMC4549237; doi:10.1371/journal.pone.0135543), 2015-08-25
Supplement: pone.0135543.s005.pdf [file pone.0135543.s005.pdf]

**Supplementary Table S5**  
**Relative Protein Abundance: Sample UM30, Metastatic**

Total Proteins Quantified = 912; LogMedian Protein Ratio = .15; LogMean Protein Ratio = 0; Standard Deviation = 0.90

| Uni-Prot Accession | Protein                                                              | Ratio UM/Control | Standard Deviation | p value | Unique Peptides | % Sequence Coverage |
|--------------------|----------------------------------------------------------------------|------------------|--------------------|---------|-----------------|---------------------|
| P06454             | Prothymosin alpha                                                    | 15.69            | 0.464              | 3.6E-02 | 3               | 21.6                |
| P62937             | Peptidyl-prolyl cis-trans isomerase A                                | 10.01            | 0.098              | 1.4E-12 | 7               | 38.2                |
| P27695             | DNA-(apurinic or apyrimidinic site) lyase                            | 6.95             | 0.231              | 9.1E-03 | 3               | 11.9                |
| P30086             | Phosphatidylethanolamine-binding protein 1                           | 6.04             | 0.102              | 3.1E-07 | 9               | 52.9                |
| Q13510             | Acid ceramidase                                                      | 6.03             | 0.103              | 2.6E-10 | 8               | 16.2                |
| P02768             | Serum albumin                                                        | 5.69             | 0.029              | 0.0E+00 | 39              | 62.6                |
| P78417             | Glutathione S-transferase omega-1                                    | 5.57             | 0.141              | 1.3E-08 | 10              | 35.3                |
| P10599             | Thioredoxin                                                          | 5.52             | 0.144              | 7.1E-05 | 3               | 32.4                |
| P57729             | Ras-related protein Rab-38                                           | 5.52             | 0.171              | 1.0E-05 | 4               | 17.1                |
| P63241             | Eukaryotic translation initiation factor 5A-1                        | 5.45             | 0.165              | 1.1E-03 | 7               | 33.1                |
| P06865             | Beta-hexosaminidase subunit alpha                                    | 5.44             | 0.088              | 1.5E-09 | 9               | 16.4                |
| Q9BV36             | Melanophilin                                                         | 5.19             | 0.284              | 4.3E-02 | 3               | 5.8                 |
| P60174             | Triosephosphate isomerase                                            | 5.06             | 0.115              | 4.1E-06 | 14              | 55.6                |
| P06748             | Nucleophosmin                                                        | 4.99             | 0.083              | 7.7E-12 | 8               | 26.2                |
| P07686             | Beta-hexosaminidase subunit beta                                     | 4.93             | 0.167              | 1.3E-05 | 12              | 20.3                |
| O15400             | Syntaxin-7                                                           | 4.90             | 0.112              | 4.3E-06 | 4               | 17.2                |
| P23381             | Tryptophan--tRNA ligase, cytoplasmic                                 | 4.81             | 0.166              | 3.9E-03 | 5               | 8.3                 |
| P16070             | CD44 antigen                                                         | 4.78             | 0.107              | 1.8E-07 | 11              | 13.6                |
| O75368             | SH3 domain-binding glutamic acid-rich-like protein                   | 4.73             | 0.212              | 1.5E-04 | 3               | 21.1                |
| P0DMEO             | Protein SETSIP                                                       | 4.51             | 0.137              | 2.8E-06 | 4               | 15.6                |
| P52565             | Rho GDP-dissociation inhibitor 1                                     | 4.48             | 0.087              | 2.8E-09 | 4               | 22.5                |
| P15531             | Nucleoside diphosphate kinase A                                      | 4.45             | 0.105              | 5.3E-07 | 7               | 52.6                |
| Q8IV08             | Phospholipase D3                                                     | 4.35             | 0.133              | 2.5E-06 | 3               | 6.3                 |
| P19338             | Nucleolin                                                            | 4.34             | 0.075              | 2.2E-16 | 18              | 21.3                |
| P23528             | Cofilin-1                                                            | 4.29             | 0.147              | 3.4E-04 | 6               | 40.4                |
| P00558             | Phosphoglycerate kinase 1                                            | 4.27             | 0.099              | 3.6E-10 | 14              | 29.5                |
| P09429             | High mobility group protein B1                                       | 4.15             | 0.130              | 3.8E-05 | 6               | 21.9                |
| P40926             | Malate dehydrogenase, mitochondrial                                  | 4.10             | 0.076              | 1.9E-09 | 12              | 41.4                |
| Q9Y2X3             | Nucleolar protein 58                                                 | 4.03             | 0.104              | 3.1E-04 | 4               | 10.8                |
| Q00796             | Sorbitol dehydrogenase                                               | 3.97             | 0.284              | 1.5E-02 | 3               | 4.8                 |
| Q08380             | Galectin-3-binding protein                                           | 3.97             | 0.099              | 4.0E-06 | 5               | 10.4                |
| P07195             | L-lactate dehydrogenase B chain                                      | 3.81             | 0.057              | 1.5E-08 | 8               | 24.0                |
| P12955             | Xaa-Pro dipeptidase                                                  | 3.78             | 0.230              | 3.9E-02 | 4               | 7.5                 |
| P04080             | Cystatin-B                                                           | 3.71             | 0.128              | 8.6E-07 | 4               | 52.0                |
| P30837             | Aldehyde dehydrogenase X, mitochondrial                              | 3.70             | 0.101              | 1.0E-09 | 7               | 18.8                |
| Q13185             | Chromobox protein homolog 3                                          | 3.62             | 0.101              | 1.3E-05 | 4               | 20.8                |
| P29401             | Transketolase                                                        | 3.57             | 0.143              | 9.1E-05 | 9               | 16.2                |
| P02787             | Serotransferrin                                                      | 3.55             | 0.056              | 0.0E+00 | 19              | 30.1                |
| P63104             | 14-3-3 protein zeta/delta                                            | 3.29             | 0.076              | 1.7E-03 | 9               | 42.4                |
| P08758             | Annexin A5                                                           | 3.23             | 0.052              | 0.0E+00 | 16              | 49.1                |
| P07602             | Prosaposin                                                           | 3.21             | 0.047              | 5.2E-10 | 5               | 7.1                 |
| O14818             | Proteasome subunit alpha type-7                                      | 3.20             | 0.065              | 1.1E-04 | 4               | 14.9                |
| Q07955             | Serine/arginine-rich splicing factor 1                               | 3.20             | 0.090              | 1.8E-07 | 5               | 17.3                |
| P33121             | Long-chain-fatty-acid--CoA ligase 1                                  | 3.15             | 0.141              | 8.3E-03 | 4               | 7.9                 |
| P40925             | Malate dehydrogenase, cytoplasmic                                    | 3.13             | 0.127              | 2.2E-03 | 6               | 21.9                |
| P25786             | Proteasome subunit alpha type-1                                      | 3.04             | 0.088              | 1.3E-04 | 7               | 25.1                |
| P25788             | Proteasome subunit alpha type-3                                      | 3.00             | 0.086              | 4.0E-05 | 4               | 13.7                |
| P31948             | Stress-induced-phosphoprotein 1                                      | 2.98             | 0.088              | 1.8E-05 | 10              | 15.5                |
| P20618             | Proteasome subunit beta type-1                                       | 2.98             | 0.153              | 8.9E-05 | 3               | 13.3                |
| Q9H3G5             | Probable serine carboxypeptidase CPVL                                | 2.96             | 0.162              | 6.4E-03 | 3               | 6.3                 |
| P23526             | Adenosylhomocysteinase                                               | 2.93             | 0.127              | 1.8E-04 | 6               | 15.5                |
| Q92820             | Gamma-glutamyl hydrolase                                             | 2.92             | 0.147              | 1.1E-03 | 6               | 19.8                |
| P39687             | Acidic leucine-rich nuclear phosphoprotein 32 family member A        | 2.92             | 0.136              | 1.1E-03 | 5               | 14.5                |
| P51858             | Hepatoma-derived growth factor                                       | 2.92             | 0.135              | 8.7E-04 | 7               | 34.6                |
| P04406             | Glyceraldehyde-3-phosphate dehydrogenase                             | 2.90             | 0.061              | 3.0E-08 | 9               | 30.7                |
| P61916             | Epididymal secretory protein E1                                      | 2.89             | 0.310              | 2.6E-02 | 3               | 17.2                |
| P10253             | Lysosomal alpha-glucosidase                                          | 2.79             | 0.218              | 2.1E-02 | 3               | 3.5                 |
| Q04760             | Lactoylglutathione lyase                                             | 2.78             | 0.095              | 5.2E-05 | 3               | 14.1                |
| P99999             | Cytochrome c                                                         | 2.77             | 0.136              | 9.4E-06 | 5               | 43.8                |
| P06737             | Glycogen phosphorylase, liver form                                   | 2.77             | 0.064              | 3.8E-14 | 16              | 18.2                |
| P61604             | 10 kDa heat shock protein, mitochondrial                             | 2.72             | 0.099              | 2.8E-05 | 6               | 51.0                |
| O75380             | NADH dehydrogenase [ubiquinone] iron-sulfur protein 6, mitochondrial | 2.72             | 0.231              | 1.4E-02 | 4               | 31.5                |
| P06733             | Alpha-enolase                                                        | 2.72             | 0.064              | 1.0E-09 | 12              | 33.9                |
| P60842             | Eukaryotic initiation factor 4A-I                                    | 2.69             | 0.090              | 5.6E-05 | 3               | 8.9                 |
| P07910             | Heterogeneous nuclear ribonucleoproteins C1/C2                       | 2.67             | 0.104              | 6.5E-06 | 9               | 27.1                |
| Q95336             | 6-phosphogluconolactonase                                            | 2.60             | 0.146              | 6.9E-03 | 5               | 25.2                |
| P62158             | Calmodulin                                                           | 2.58             | 0.097              | 3.3E-05 | 5               | 34.2                |
| P15121             | Aldose reductase                                                     | 2.57             | 0.137              | 6.1E-03 | 3               | 10.4                |
| P00338             | L-lactate dehydrogenase A chain                                      | 2.56             | 0.101              | 1.9E-06 | 8               | 20.8                |
| P22087             | rRNA 2'-O-methyltransferase fibrillar                                | 2.55             | 0.044              | 5.0E-03 | 4               | 13.1                |
| P07858             | Cathepsin B                                                          | 2.52             | 0.066              | 1.2E-07 | 5               | 15.9                |
| Q14247             | Src substrate cortactin                                              | 2.50             | 0.261              | 1.4E-02 | 5               | 11.5                |
| P40121             | Macrophage-capping protein                                           | 2.48             | 0.255              | 1.7E-02 | 3               | 9.2                 |
| P51810             | G-protein coupled receptor 143                                       | 2.47             | 0.123              | 2.1E-04 | 3               | 9.9                 |
| P06744             | Glucose-6-phosphate isomerase                                        | 2.47             | 0.123              | 1.2E-04 | 7               | 13.1                |
| Q9H1E3             | Nuclear ubiquitously casein and cyclin-dependent kinase substrate 1  | 11.86            | NA                 | NA      | 2               | 11.9                |
| Q9UL41             | Paraneoplastic antigen Ma3                                           | 7.45             | NA                 | NA      | 2               | 5.4                 |
| P55769             | NHP2-like protein 1                                                  | 6.69             | NA                 | NA      | 2               | 14.8                |
| O00625             | Pirin                                                                | 6.02             | NA                 | NA      | 2               | 6.2                 |
| P08236             | Beta-glucuronidase                                                   | 5.94             | NA                 | NA      | 2               | 3.4                 |
| O14556             | Glyceraldehyde-3-phosphate dehydrogenase, testis-specific            | 5.38             | 0.387              | 4.0E-01 | 3               | 8.8                 |
| P05413             | Fatty acid-binding protein, heart                                    | 4.75             | 0.085              | 5.4E-02 | 3               | 21.8                |
| Q8WWM9             | Cytoglobin                                                           | 4.71             | NA                 | NA      | 2               | 8.4                 |
| P17096             | High mobility group protein HMG-I/HMG-Y                              | 4.56             | NA                 | NA      | 2               | 23.4                |
| P07108             | Acyl-CoA-binding protein                                             | 4.56             | NA                 | NA      | 2               | 41.4                |
| P58546             | Myotrophin                                                           | 4.08             | NA                 | NA      | 2               | 25.4                |
| Q15843             | NEDD8                                                                | 3.88             | NA                 | NA      | 2               | 17.3                |
| Q03154             | Aminoacylase-1                                                       | 3.45             | 0.301              | 4.0E-01 | 3               | 7.4                 |
| Q9JBR2             | Cathepsin Z                                                          | 3.45             | 0.142              | 9.7E-02 | 3               | 9.6                 |
| P62310             | U6 snRNA-associated Sm-like protein LSm3                             | 3.26             | NA                 | NA      | 2               | 19.6                |
| P02766             | Transthyretin                                                        | 3.25             | 0.434              | 6.0E-02 | 3               | 28.6                |
| Q08170             | Serine/arginine-rich splicing factor 4                               | 3.19             | NA                 | NA      | 2               | 4.3                 |
| P13693             | Translationally-controlled tumor protein                             | 3.11             | NA                 | NA      | 2               | 15.7                |
| Q8IZG5             | Selenoprotein H                                                      | 3.11             | NA                 | NA      | 2               | 18.0                |
| P11766             | Alcohol dehydrogenase class-3                                        | 3.07             | NA                 | NA      | 2               | 4.5                 |
| Q9Y3C8             | Ubiquitin-fold modifier-conjugating enzyme 1                         | 3.01             | NA                 | NA      | 2               | 11.4                |
| Q9NRV9             | Heme-binding protein 1                                               | 2.99             | NA                 | NA      | 2               | 13.8                |
| P63173             | 60S ribosomal protein L38                                            | 2.91             | NA                 | NA      | 2               | 31.4                |
| P55809             | Succinyl-CoA:3-ketoacid coenzyme A transferase 1, mitochondrial      | 2.91             | NA                 | NA      | 2               | 3.5                 |
| P52815             | 39S ribosomal protein L12, mitochondrial                             | 2.90             | 0.295              | 8.0E-02 | 3               | 11.6                |
| Q9BXK5             | Bcl-2-like protein 13                                                | 2.86             | NA                 | NA      | 2               | 5.2                 |
| P60900             | Proteasome subunit alpha type-6                                      | 2.82             | 0.511              | 2.3E-01 | 3               | 15.4                |
| P07919             | Cytochrome b-c1 complex subunit 6, mitochondrial                     | 2.71             | NA                 | NA      | 2               | 15.4                |
| P40967             | Melanocyte protein PMEL                                              | 2.71             | NA                 | NA      | 2               | 3.3                 |
| P17900             | Ganglioside GM2 activator                                            | 2.69             | NA                 | NA      | 2               | 7.8                 |
| Q53EL6             | Programmed cell death protein 4                                      | 2.69             | NA                 | NA      | 2               | 4.7                 |
| Q13573             | SNW domain-containing protein 1                                      | 2.68             | NA                 | NA      | 2               | 4.7                 |
| Q6GMV3             | Putative peptidyl-tRNA hydrolase PTRHD1                              | 2.54             | NA                 | NA      | 2               | 19.3                |

Table S5-Sample UM30

|        |                                                                            |      |       |         |    |      |
|--------|----------------------------------------------------------------------------|------|-------|---------|----|------|
| Q8N183 | Mimitin, mitochondrial                                                     | 2.54 | NA    | NA      | 2  | 13.0 |
| O00560 | Syntenin-1                                                                 | 2.54 | 0.273 | 1.2E-01 | 4  | 10.7 |
| Q9Y2S2 | Lambd4-crystallin homolog                                                  | 2.53 | 0.388 | 9.1E-02 | 3  | 10.7 |
| P39748 | Flap endonuclease 1                                                        | 2.53 | NA    | NA      | 2  | 4.5  |
| Q99572 | P2X purinoceptor 7                                                         | 2.53 | NA    | NA      | 2  | 4.5  |
| P30044 | Peroxisome oxidin-5, mitochondrial                                         | 2.50 | NA    | NA      | 2  | 11.7 |
| P07900 | Heat shock protein HSP 90-alpha                                            | 2.46 | 0.063 | 8.5E-06 | 15 | 17.6 |
| P16401 | Histone H1.5                                                               | 2.46 | NA    | NA      | 2  | 9.7  |
| P20042 | Eukaryotic translation initiation factor 2 subunit 2                       | 2.44 | NA    | NA      | 2  | 9.9  |
| Q18658 | Fascin                                                                     | 2.44 | NA    | NA      | 2  | 6.1  |
| P15586 | N-acetylglucosamine-6-sulfatase                                            | 2.44 | 0.074 | 8.1E-04 | 3  | 4.7  |
| Q8UHL4 | Dipeptidyl peptidase 2                                                     | 2.44 | 0.657 | 2.6E-01 | 3  | 6.9  |
| Q99497 | Protein DJ-1                                                               | 2.43 | 0.182 | 5.8E-02 | 6  | 28.0 |
| P13797 | Plastin-3                                                                  | 2.43 | 0.148 | 2.6E-03 | 8  | 15.2 |
| Q01130 | Serine/arginine-rich splicing factor 2                                     | 2.40 | 0.058 | 2.4E-04 | 3  | 14.5 |
| P62857 | 40S ribosomal protein S28                                                  | 2.40 | NA    | NA      | 2  | 30.4 |
| P17643 | 5,6-dihydroxyindole-2-carboxylic acid oxidase                              | 2.39 | 0.127 | 3.0E-02 | 8  | 15.3 |
| Q14103 | Heterogeneous nuclear ribonucleoprotein D0                                 | 2.38 | 0.094 | 7.5E-05 | 3  | 9.0  |
| P62826 | GTP-binding nuclear protein Ran                                            | 2.38 | NA    | NA      | 2  | 9.7  |
| P07339 | Cathepsin D                                                                | 2.37 | 0.083 | 1.1E-07 | 8  | 19.7 |
| Q13838 | Spliceosome RNA helicase DDX39B                                            | 2.37 | 0.089 | 5.4E-05 | 3  | 7.2  |
| Q9GZY8 | Mitochondrial fission factor                                               | 2.36 | NA    | NA      | 2  | 6.4  |
| Q15631 | Translin                                                                   | 2.35 | NA    | NA      | 2  | 8.8  |
| P49773 | Histidine triad nucleotide-binding protein 1                               | 2.35 | 0.380 | 6.4E-02 | 3  | 31.7 |
| P53999 | Activated RNA polymerase II transcriptional coactivator p15                | 2.34 | NA    | NA      | 2  | 15.7 |
| P08670 | Vimentin                                                                   | 2.34 | 0.046 | 0.0E+00 | 27 | 56.4 |
| P07741 | Adenine phosphoribosyltransferase                                          | 2.33 | NA    | NA      | 2  | 10.0 |
| O14979 | Heterogeneous nuclear ribonucleoprotein D-like                             | 2.32 | 0.087 | 2.8E-05 | 3  | 4.5  |
| P10721 | Mast/stem cell growth factor receptor Kit                                  | 2.32 | 0.097 | 2.3E-02 | 3  | 2.4  |
| P05387 | 60S acidic ribosomal protein P2                                            | 2.32 | 0.086 | 2.8E-06 | 6  | 60.9 |
| Q12906 | Interleukin enhancer-binding factor 3                                      | 2.30 | 0.123 | 9.6E-05 | 12 | 16.0 |
| Q00059 | Transcription factor A, mitochondrial                                      | 2.29 | 0.069 | 1.2E-03 | 5  | 20.3 |
| Q86UE4 | Protein LYRIC                                                              | 2.28 | NA    | NA      | 2  | 2.7  |
| P08195 | 4F2 cell-surface antigen heavy chain                                       | 2.28 | 0.078 | 2.4E-06 | 8  | 16.3 |
| P37837 | Transaldolase                                                              | 2.27 | 0.115 | 2.4E-03 | 7  | 19.3 |
| Q08AM6 | Protein VAC14 homolog                                                      | 2.25 | NA    | NA      | 2  | 2.8  |
| Q13442 | 28 kDa heat- and acid-stable phosphoprotein                                | 2.24 | NA    | NA      | 2  | 13.8 |
| P00441 | Superoxide dismutase [Cu-Zn]                                               | 2.23 | 0.158 | 1.7E-03 | 3  | 16.9 |
| P09622 | Dihydropyridyl dehydrogenase, mitochondrial                                | 2.23 | 0.070 | 1.0E-06 | 6  | 12.2 |
| P30533 | Alpha-2-macroglobulin receptor-associated protein                          | 2.17 | 0.074 | 2.0E-02 | 4  | 11.2 |
| Q96KP4 | Cytosolic non-specific dipeptidase                                         | 2.16 | 0.064 | 1.9E-04 | 5  | 13.9 |
| Q12905 | Interleukin enhancer-binding factor 2                                      | 2.14 | 0.061 | 2.3E-05 | 3  | 9.5  |
| P48637 | Glutathione synthetase                                                     | 2.14 | NA    | NA      | 2  | 3.8  |
| Q00688 | Peptidyl-prolyl cis-trans isomerase FKBP3                                  | 2.14 | NA    | NA      | 2  | 9.8  |
| P09417 | Dihydropyridine reductase                                                  | 2.13 | NA    | NA      | 2  | 12.3 |
| P06753 | Tropomyosin alpha-3 chain                                                  | 2.13 | 0.113 | 8.5E-05 | 4  | 13.0 |
| P30042 | ES1 protein homolog, mitochondrial                                         | 2.12 | 0.217 | 1.8E-02 | 6  | 28.4 |
| P51608 | Methyl-CpG-binding protein 2                                               | 2.12 | NA    | NA      | 2  | 5.1  |
| P13489 | Ribonuclease inhibitor                                                     | 2.09 | 0.085 | 1.3E-02 | 3  | 6.1  |
| Q9Y4W6 | AFG3-like protein 2                                                        | 2.08 | 0.153 | 2.0E-02 | 8  | 10.8 |
| P43243 | Matrin-3                                                                   | 2.07 | 0.151 | 6.0E-02 | 3  | 4.1  |
| Q9BRA2 | Thioredoxin domain-containing protein 17                                   | 2.06 | NA    | NA      | 2  | 18.7 |
| P62851 | 40S ribosomal protein S25                                                  | 2.06 | 0.070 | 6.5E-05 | 4  | 24.0 |
| P23246 | Splicing factor, proline- and glutamine-rich                               | 2.05 | 0.103 | 1.7E-04 | 7  | 10.6 |
| P24534 | Elongation factor 1-beta                                                   | 2.05 | 0.129 | 2.2E-02 | 3  | 13.3 |
| P25398 | 40S ribosomal protein S12                                                  | 2.04 | NA    | NA      | 2  | 13.6 |
| P51688 | N-sulphoglucosamine sulphohydrolase                                        | 2.03 | NA    | NA      | 2  | 4.8  |
| P18669 | Phosphoglycerate mutase 1                                                  | 2.02 | 0.083 | 7.8E-05 | 5  | 29.9 |
| Q75083 | WD repeat-containing protein 1                                             | 2.02 | 0.098 | 1.1E-03 | 5  | 8.3  |
| Q99536 | Synaptic vesicle membrane protein VAT-1 homolog                            | 2.01 | 0.073 | 2.5E-09 | 12 | 38.7 |
| Q18698 | 2,4-dienoyl-CoA reductase, mitochondrial                                   | 2.00 | 0.088 | 1.6E-02 | 5  | 16.4 |
| Q75351 | Vacuolar protein sorting-associated protein 4B                             | 2.00 | NA    | NA      | 2  | 5.4  |
| P13639 | Elongation factor 2                                                        | 1.99 | 0.097 | 9.4E-08 | 15 | 19.2 |
| P45973 | Chromobox protein homolog 5                                                | 1.98 | NA    | NA      | 2  | 11.0 |
| P62258 | 14-3-3 protein epsilon                                                     | 1.97 | 0.111 | 3.3E-03 | 9  | 33.7 |
| Q99798 | Aconitate hydratase, mitochondrial                                         | 1.96 | 0.069 | 2.9E-05 | 8  | 12.4 |
| P02765 | Alpha-2-HS-glycoprotein                                                    | 1.96 | 0.301 | 2.8E-01 | 3  | 7.4  |
| P31939 | Bifunctional purine biosynthesis protein PURH                              | 1.95 | 0.442 | 2.0E-01 | 5  | 11.0 |
| Q14956 | Transmembrane glycoprotein NMB                                             | 1.94 | 0.281 | 1.7E-02 | 5  | 10.0 |
| P50395 | Rab GDP dissociation inhibitor beta                                        | 1.94 | 0.098 | 7.8E-05 | 7  | 18.4 |
| P61978 | Heterogeneous nuclear ribonucleoprotein K                                  | 1.94 | 0.066 | 2.8E-05 | 13 | 32.4 |
| Q06787 | Fragile X mental retardation protein 1                                     | 1.94 | NA    | NA      | 2  | 2.7  |
| P22626 | Heterogeneous nuclear ribonucleoproteins A2/B1                             | 1.94 | 0.061 | 9.9E-09 | 13 | 33.1 |
| Q09651 | Heterogeneous nuclear ribonucleoprotein A1                                 | 1.93 | 0.044 | 1.6E-09 | 6  | 16.7 |
| Q15717 | ELAV-like protein 1                                                        | 1.93 | NA    | NA      | 2  | 7.7  |
| Q14561 | Acyl carrier protein, mitochondrial                                        | 1.91 | NA    | NA      | 2  | 9.6  |
| P35268 | 60S ribosomal protein L22                                                  | 1.90 | NA    | NA      | 2  | 18.8 |
| P0CW22 | 40S ribosomal protein S17-like                                             | 1.89 | 0.126 | 6.3E-03 | 3  | 16.3 |
| Q96C86 | m7GpppX diphosphatase                                                      | 1.86 | 0.488 | 4.3E-01 | 3  | 11.6 |
| P21796 | Voltage-dependent anion-selective channel protein 1                        | 1.86 | 0.059 | 8.9E-05 | 8  | 35.0 |
| P14854 | Cytochrome c oxidase subunit 6B1                                           | 1.86 | 0.085 | 1.3E-01 | 3  | 24.4 |
| Q96AG4 | Leucine-rich repeat-containing protein 59                                  | 1.85 | 0.076 | 5.7E-02 | 4  | 12.7 |
| P07954 | Fumarate hydratase, mitochondrial                                          | 1.85 | NA    | NA      | 2  | 4.3  |
| P08574 | Cytochrome c1, heme protein, mitochondrial                                 | 1.85 | 0.064 | 7.1E-04 | 3  | 8.3  |
| Q92945 | Far upstream element-binding protein 2                                     | 1.84 | 0.186 | 1.3E-02 | 7  | 12.9 |
| P36543 | V-type proton ATPase subunit E 1                                           | 1.84 | NA    | NA      | 2  | 7.1  |
| P08238 | Heat shock protein HSP 90-beta                                             | 1.83 | 0.094 | 1.5E-04 | 8  | 10.9 |
| Q02818 | Nucleobindin-1                                                             | 1.83 | 0.142 | 6.1E-03 | 6  | 16.1 |
| Q08211 | ATP-dependent RNA helicase A                                               | 1.83 | 0.158 | 1.8E-03 | 8  | 7.0  |
| Q14677 | Clathrin interactor 1                                                      | 1.83 | 0.353 | 2.2E-01 | 3  | 5.6  |
| Q8UPN3 | Microtubule-actin cross-linking factor 1, isoforms 1/2/3/5                 | 1.82 | NA    | NA      | 2  | 0.3  |
| O00483 | NADH dehydrogenase [ubiquinone] 1 alpha subcomplex subunit 4               | 1.80 | NA    | NA      | 2  | 22.2 |
| P28066 | Proteasome subunit alpha type-5                                            | 1.80 | NA    | NA      | 2  | 10.8 |
| Q9Y6M9 | NADH dehydrogenase [ubiquinone] 1 beta subcomplex subunit 9                | 1.80 | 0.258 | 6.0E-02 | 3  | 19.6 |
| P16152 | Carbonyl reductase [NADPH] 1                                               | 1.80 | NA    | NA      | 2  | 8.7  |
| Q16629 | Serine/arginine-rich splicing factor 7                                     | 1.80 | NA    | NA      | 2  | 7.6  |
| P26440 | Isovaleryl-CoA dehydrogenase, mitochondrial                                | 1.80 | NA    | NA      | 2  | 4.5  |
| P07093 | Glia-derived nexin                                                         | 1.79 | NA    | NA      | 2  | 6.0  |
| Q95182 | NADH dehydrogenase [ubiquinone] 1 alpha subcomplex subunit 7               | 1.79 | NA    | NA      | 2  | 8.8  |
| P30049 | ATP synthase subunit delta, mitochondrial                                  | 1.78 | NA    | NA      | 2  | 13.7 |
| P61247 | 40S ribosomal protein S3a                                                  | 1.78 | 0.139 | 1.0E-01 | 5  | 18.6 |
| Q15904 | V-type proton ATPase subunit S1                                            | 1.77 | NA    | NA      | 2  | 4.3  |
| P12270 | Nucleoprotein TPR                                                          | 1.77 | 0.064 | 6.6E-05 | 6  | 3.7  |
| Q9H2U2 | Inorganic pyrophosphatase 2, mitochondrial                                 | 1.77 | 0.183 | 1.6E-02 | 5  | 19.8 |
| Q9NTZ6 | RNA-binding protein 12                                                     | 1.77 | NA    | NA      | 2  | 3.3  |
| P16930 | Fumarylacetoacetase                                                        | 1.76 | NA    | NA      | 2  | 4.3  |
| P14618 | Pyruvate kinase PKM                                                        | 1.75 | 0.043 | 1.6E-12 | 10 | 23.0 |
| P11142 | Heat shock cognate 71 kDa protein                                          | 1.75 | 0.095 | 1.6E-04 | 14 | 23.2 |
| E9PAV3 | Nascent polypeptide-associated complex subunit alpha, muscle-specific form | 1.74 | 0.175 | 1.1E-02 | 3  | 2.0  |
| Q9BZZ5 | Apoptosis inhibitor 5                                                      | 1.74 | NA    | NA      | 2  | 3.4  |
| P39019 | 40S ribosomal protein S19                                                  | 1.74 | 0.064 | 1.4E-03 | 4  | 24.1 |
| P22314 | Ubiquitin-like modifier-activating enzyme 1                                | 1.74 | 0.143 | 3.1E-03 | 8  | 8.5  |
| Q15365 | Poly(rC)-binding protein 1                                                 | 1.73 | 0.204 | 4.5E-02 | 3  | 10.7 |
| P21283 | V-type proton ATPase subunit C 1                                           | 1.72 | NA    | NA      | 2  | 4.5  |
| O43852 | Calumenin                                                                  | 1.71 | 0.088 | 2.7E-04 | 5  | 18.4 |

Table S5-Sample UM30

|        |                                                                              |      |       |         |    |      |
|--------|------------------------------------------------------------------------------|------|-------|---------|----|------|
| O95299 | NADH dehydrogenase [ubiquinone] 1 alpha subcomplex subunit 10, mitochondrial | 1.71 | NA    | NA      | 2  | 6.2  |
| P61421 | V-type proton ATPase subunit d 1                                             | 1.70 | 0.053 | 1.3E-04 | 4  | 11.4 |
| O95292 | Vesicle-associated membrane protein-associated protein B/C                   | 1.70 | 0.754 | 3.5E-01 | 3  | 14.4 |
| P51991 | Heterogeneous nuclear ribonucleoprotein A3                                   | 1.70 | 0.050 | 1.1E-05 | 6  | 17.7 |
| P13010 | X-ray repair cross-complementing protein 5                                   | 1.70 | 0.133 | 7.0E-03 | 8  | 13.3 |
| P54819 | Adenylate kinase 2, mitochondrial                                            | 1.69 | 0.163 | 1.9E-02 | 3  | 14.2 |
| P62263 | 40S ribosomal protein S14                                                    | 1.69 | 0.236 | 5.2E-02 | 4  | 36.4 |
| P07737 | Profilin-1                                                                   | 1.69 | 0.133 | 6.1E-02 | 5  | 40.7 |
| O75489 | NADH dehydrogenase [ubiquinone] iron-sulfur protein 3, mitochondrial         | 1.68 | 0.060 | 8.0E-06 | 5  | 19.3 |
| Q07960 | Rho GTPase-activating protein 1                                              | 1.68 | 0.081 | 2.5E-02 | 4  | 7.3  |
| P49411 | Elongation factor Tu, mitochondrial                                          | 1.68 | 0.097 | 2.4E-05 | 10 | 27.7 |
| Q9UH65 | Switch-associated protein 70                                                 | 1.68 | NA    | NA      | 2  | 3.6  |
| A4D1P6 | WD repeat-containing protein 91                                              | 1.68 | NA    | NA      | 2  | 1.9  |
| P46763 | 40S ribosomal protein S10                                                    | 1.67 | 0.270 | 3.5E-01 | 3  | 20.0 |
| P29692 | Elongation factor 1-delta                                                    | 1.66 | 0.134 | 5.1E-02 | 3  | 10.7 |
| P52597 | Heterogeneous nuclear ribonucleoprotein F                                    | 1.66 | 0.100 | 1.3E-02 | 4  | 8.2  |
| P46777 | 60S ribosomal protein L5                                                     | 1.64 | 0.097 | 1.2E-03 | 4  | 15.5 |
| P37802 | Transgelin-2                                                                 | 1.64 | NA    | NA      | 2  | 10.1 |
| Q9Y2Q3 | Glutathione S-transferase kappa 1                                            | 1.64 | NA    | NA      | 2  | 11.9 |
| P26599 | Polypyrimidine tract-binding protein 1                                       | 1.64 | 0.119 | 7.3E-03 | 4  | 6.2  |
| P42704 | Leucine-rich PPR motif-containing protein, mitochondrial                     | 1.63 | 0.075 | 5.0E-04 | 10 | 7.1  |
| P52272 | Heterogeneous nuclear ribonucleoprotein M                                    | 1.63 | 0.124 | 4.0E-03 | 11 | 15.9 |
| Q9Y383 | Putative RNA-binding protein Luc7-like 2                                     | 1.63 | NA    | NA      | 2  | 4.6  |
| P62829 | 60S ribosomal protein L23                                                    | 1.63 | NA    | NA      | 2  | 16.4 |
| O95298 | NADH dehydrogenase [ubiquinone] 1 subunit C2                                 | 1.63 | NA    | NA      | 2  | 16.8 |
| Q16655 | Melanoma antigen recognized by T-cells 1                                     | 1.62 | NA    | NA      | 2  | 17.8 |
| Q15907 | Ras-related protein Rab-11B                                                  | 1.62 | 0.150 | 1.1E-02 | 4  | 17.4 |
| Q9NP81 | Serine--tRNA ligase, mitochondrial                                           | 1.62 | NA    | NA      | 2  | 6.9  |
| Q9Y2B0 | Protein canopy homolog 2                                                     | 1.61 | 0.150 | 6.2E-02 | 4  | 25.8 |
| O75390 | Citrate synthase, mitochondrial                                              | 1.61 | 0.095 | 2.1E-02 | 5  | 11.8 |
| P54652 | Heat shock-related 70 kDa protein 2                                          | 1.61 | 0.126 | 6.8E-02 | 5  | 10.2 |
| P26885 | Peptidyl-prolyl cis-trans isomerase FKBP2                                    | 1.61 | NA    | NA      | 2  | 9.2  |
| Q15233 | Non-POU domain-containing octamer-binding protein                            | 1.61 | 0.263 | 5.8E-02 | 5  | 13.4 |
| Q13263 | Transcription intermediary factor 1-beta                                     | 1.60 | 0.133 | 8.8E-03 | 7  | 7.9  |
| P36955 | Pigment epithelium-derived factor                                            | 1.60 | 0.109 | 2.4E-02 | 4  | 10.3 |
| P26641 | Elongation factor 1-gamma                                                    | 1.59 | 0.167 | 4.1E-02 | 4  | 8.9  |
| P12830 | Cadherin-1                                                                   | 1.58 | 0.186 | 1.1E-01 | 7  | 8.4  |
| P53597 | Succinyl-CoA ligase [ADP/GDP-forming] subunit alpha, mitochondrial           | 1.58 | NA    | NA      | 2  | 6.9  |
| Q08865 | 40S ribosomal protein SA                                                     | 1.58 | 0.123 | 2.0E-03 | 6  | 25.4 |
| Q00839 | Heterogeneous nuclear ribonucleoprotein U                                    | 1.57 | 0.048 | 2.9E-06 | 10 | 12.6 |
| Q13123 | Protein Red                                                                  | 1.57 | NA    | NA      | 2  | 3.8  |
| P78527 | DNA-dependent protein kinase catalytic subunit                               | 1.57 | 0.056 | 1.7E-06 | 17 | 3.8  |
| O43399 | Tumor protein D54                                                            | 1.57 | 0.165 | 7.8E-02 | 3  | 15.0 |
| P26373 | 60S ribosomal protein L13                                                    | 1.57 | 0.082 | 1.1E-03 | 4  | 19.0 |
| P12956 | X-ray repair cross-complementing protein 6                                   | 1.57 | 0.083 | 5.3E-04 | 7  | 10.8 |
| P34932 | Heat shock 70 kDa protein 4                                                  | 1.56 | 0.079 | 9.2E-03 | 7  | 8.1  |
| P36578 | 60S ribosomal protein L4                                                     | 1.56 | 0.190 | 2.0E-02 | 5  | 11.2 |
| P61019 | Ras-related protein Rab-2A                                                   | 1.56 | 0.125 | 7.3E-02 | 3  | 20.3 |
| Q92688 | Acidic leucine-rich nuclear phosphoprotein 32 family member B                | 1.56 | 0.170 | 5.8E-02 | 6  | 17.5 |
| P37108 | Signal recognition particle 14 kDa protein                                   | 1.55 | NA    | NA      | 2  | 12.5 |
| P19404 | NADH dehydrogenase [ubiquinone] flavoprotein 2, mitochondrial                | 1.55 | NA    | NA      | 2  | 9.6  |
| Q8NC51 | Plasminogen activator inhibitor 1 RNA-binding protein                        | 1.55 | 0.186 | 1.7E-01 | 4  | 9.1  |
| P51149 | Ras-related protein Rab-7a                                                   | 1.55 | 0.091 | 1.3E-03 | 4  | 18.8 |
| P38646 | Stress-70 protein, mitochondrial                                             | 1.54 | 0.159 | 9.8E-03 | 11 | 18.4 |
| O75533 | Splicing factor 3B subunit 1                                                 | 1.54 | NA    | NA      | 2  | 1.7  |
| Q9BUJ2 | Heterogeneous nuclear ribonucleoprotein U-like protein 1                     | 1.54 | 0.141 | 1.8E-02 | 4  | 6.3  |
| P49207 | 60S ribosomal protein L34                                                    | 1.54 | NA    | NA      | 2  | 13.7 |
| P02790 | Hemopexin                                                                    | 1.54 | 0.088 | 1.5E-03 | 4  | 7.6  |
| P04075 | Fructose-bisphosphate aldolase A                                             | 1.53 | 0.052 | 5.7E-05 | 13 | 44.2 |
| P55786 | Puromycin-sensitive aminopeptidase                                           | 1.53 | 0.297 | 1.2E-01 | 4  | 4.9  |
| Q5VTE0 | Putative elongation factor 1-alpha-like 3                                    | 1.53 | 0.066 | 1.1E-04 | 10 | 21.4 |
| P62081 | 40S ribosomal protein S7                                                     | 1.53 | NA    | NA      | 2  | 8.8  |
| Q16836 | Hydroxyacyl-coenzyme A dehydrogenase, mitochondrial                          | 1.53 | NA    | NA      | 2  | 7.3  |
| P46926 | Glucosamine-6-phosphate isomerase 1                                          | 1.52 | 0.128 | 1.6E-02 | 5  | 14.2 |
| O94906 | Pre-mRNA-processing factor 6                                                 | 1.52 | NA    | NA      | 2  | 2.1  |
| P14314 | Glucosidase 2 subunit beta                                                   | 1.52 | 0.091 | 1.1E-02 | 8  | 11.4 |
| Q14683 | Structural maintenance of chromosomes protein 1A                             | 1.51 | 0.326 | 8.6E-02 | 3  | 2.4  |
| Q8TAQ2 | SWI/SNF complex subunit SMARCC2                                              | 1.50 | 0.138 | 2.3E-01 | 3  | 3.0  |
| P05141 | ADP/ATP translocase 2                                                        | 1.50 | 0.102 | 2.8E-02 | 4  | 13.1 |
| O76021 | Ribosomal L1 domain-containing protein 1                                     | 1.49 | NA    | NA      | 2  | 4.5  |
| Q658Y4 | Protein FAM91A1                                                              | 1.48 | NA    | NA      | 2  | 1.9  |
| P84077 | ADP-ribosylation factor 1                                                    | 1.48 | 0.040 | 9.3E-04 | 3  | 18.2 |
| Q8IVF2 | Protein AHNAK2                                                               | 1.48 | 0.268 | 6.2E-01 | 11 | 0.7  |
| Q13428 | Treacle protein                                                              | 1.48 | NA    | NA      | 2  | 1.6  |
| O75494 | Serine/arginine-rich splicing factor 10                                      | 1.48 | NA    | NA      | 2  | 8.4  |
| P10606 | Cytochrome c oxidase subunit 5B, mitochondrial                               | 1.48 | 0.156 | 4.3E-02 | 6  | 31.0 |
| P16402 | Histone H1.3                                                                 | 1.47 | 0.108 | 1.0E-03 | 6  | 15.4 |
| Q14974 | Importin subunit beta-1                                                      | 1.47 | 0.757 | 2.3E-01 | 4  | 6.7  |
| P21291 | Cysteine and glycine-rich protein 1                                          | 1.47 | NA    | NA      | 2  | 14.0 |
| P48426 | Phosphatidylinositol 5-phosphate 4-kinase type-2 alpha                       | 1.47 | NA    | NA      | 2  | 4.9  |
| P09525 | Annexin A4                                                                   | 1.47 | 0.123 | 1.8E-03 | 10 | 28.5 |
| P00505 | Aspartate aminotransferase, mitochondrial                                    | 1.46 | 0.061 | 4.6E-04 | 7  | 18.6 |
| O14737 | Programmed cell death protein 5                                              | 1.46 | NA    | NA      | 2  | 17.6 |
| Q9GZT3 | SRA stem-loop-interacting RNA-binding protein, mitochondrial                 | 1.45 | NA    | NA      | 2  | 24.8 |
| Q9UHX1 | Poly(U)-binding-splicing factor PUF60                                        | 1.45 | 0.120 | 9.7E-02 | 4  | 7.7  |
| Q07666 | KH domain-containing, RNA-binding, signal transduction-associated protein 1  | 1.45 | 0.096 | 2.4E-02 | 4  | 7.9  |
| P16219 | Short-chain specific acyl-CoA dehydrogenase, mitochondrial                   | 1.45 | NA    | NA      | 2  | 4.6  |
| Q14773 | Tripeptidyl-peptidase 1                                                      | 1.45 | 0.057 | 3.1E-04 | 4  | 8.7  |
| P54727 | UV excision repair protein RAD23 homolog B                                   | 1.45 | 0.236 | 8.2E-02 | 4  | 9.3  |
| Q06323 | Proteasome activator complex subunit 1                                       | 1.44 | 0.159 | 6.4E-02 | 3  | 14.1 |
| P62269 | 40S ribosomal protein S18                                                    | 1.44 | 0.050 | 1.7E-04 | 6  | 31.6 |
| P78347 | General transcription factor II-I                                            | 1.44 | 0.084 | 5.7E-03 | 5  | 3.7  |
| P30084 | Enoyl-CoA hydratase, mitochondrial                                           | 1.44 | NA    | NA      | 2  | 8.3  |
| P14868 | Aspartate--tRNA ligase, cytoplasmic                                          | 1.44 | 0.085 | 6.0E-03 | 4  | 11.0 |
| Q14152 | Eukaryotic translation initiation factor 3 subunit A                         | 1.44 | 0.102 | 4.9E-02 | 5  | 4.5  |
| P20674 | Cytochrome c oxidase subunit 5A, mitochondrial                               | 1.44 | 0.113 | 6.7E-02 | 4  | 20.7 |
| O95202 | LETM1 and EF-hand domain-containing protein 1, mitochondrial                 | 1.43 | 0.103 | 1.9E-02 | 4  | 6.1  |
| Q9HD20 | Manganese-transporting ATPase 13A1                                           | 1.43 | 0.223 | 1.9E-01 | 3  | 3.2  |
| Q96124 | Far upstream element-binding protein 3                                       | 1.43 | 0.109 | 2.8E-02 | 4  | 7.7  |
| P27348 | 14-3-3 protein theta                                                         | 1.42 | 0.085 | 7.8E-02 | 3  | 6.9  |
| P09211 | Glutathione S-transferase P                                                  | 1.41 | 0.230 | 2.2E-01 | 5  | 33.8 |
| Q96199 | Succinyl-CoA ligase [GDP-forming] subunit beta, mitochondrial                | 1.41 | NA    | NA      | 2  | 5.8  |
| P28331 | NADH-ubiquinone oxidoreductase 75 kDa subunit, mitochondrial                 | 1.41 | 0.081 | 2.2E-02 | 4  | 5.9  |
| Q86VP6 | Cullin-associated NEDD8-dissociated protein 1                                | 1.41 | NA    | NA      | 2  | 1.5  |
| Q9UKM9 | RNA-binding protein Raly                                                     | 1.40 | NA    | NA      | 2  | 10.8 |
| P50213 | Isocitrate dehydrogenase [NAD] subunit alpha, mitochondrial                  | 1.40 | 0.068 | 6.1E-03 | 5  | 14.5 |
| P49189 | 4-trimethylaminobutyraldehyde dehydrogenase                                  | 1.40 | NA    | NA      | 2  | 3.6  |
| P48047 | ATP synthase subunit O, mitochondrial                                        | 1.40 | 0.126 | 3.0E-03 | 4  | 26.3 |
| P51159 | Ras-related protein Rab-27A                                                  | 1.40 | 0.034 | 7.4E-04 | 3  | 15.4 |
| P62906 | 60S ribosomal protein L10a                                                   | 1.39 | 0.136 | 4.2E-02 | 6  | 27.6 |
| P49591 | Serine--tRNA ligase, cytoplasmic                                             | 1.39 | NA    | NA      | 2  | 5.3  |
| Q13011 | Delta(3,5)-Delta(2,4)-dienoyl-CoA isomerase, mitochondrial                   | 1.39 | 0.073 | 4.1E-04 | 5  | 15.2 |
| P35232 | Prohibitin                                                                   | 1.39 | 0.047 | 1.6E-06 | 7  | 26.8 |
| Q8NDH3 | Probable aminopeptidase NPEPL1                                               | 1.39 | NA    | NA      | 2  | 4.2  |
| O95168 | NADH dehydrogenase [ubiquinone] 1 beta subcomplex subunit 4                  | 1.38 | NA    | NA      | 2  | 17.8 |

Table S5-Sample UM30

|        |                                                                                                                 |      |       |         |    |      |
|--------|-----------------------------------------------------------------------------------------------------------------|------|-------|---------|----|------|
| P62750 | 60S ribosomal protein L23a                                                                                      | 1.38 | NA    | NA      | 2  | 13.5 |
| P14866 | Heterogeneous nuclear ribonucleoprotein L                                                                       | 1.38 | 0.054 | 3.0E-04 | 5  | 10.2 |
| Q08945 | FACT complex subunit SSRP1                                                                                      | 1.38 | NA    | NA      | 2  | 2.0  |
| P31153 | S-adenosylmethionine synthase isoform type-2                                                                    | 1.38 | 0.062 | 5.4E-02 | 3  | 9.4  |
| P26368 | Splicing factor U2AF 65 kDa subunit                                                                             | 1.37 | NA    | NA      | 2  | 5.9  |
| Q8N5K1 | CDGSH iron-sulfur domain-containing protein 2                                                                   | 1.37 | 0.186 | 8.0E-02 | 3  | 26.7 |
| Q9BVK6 | Transmembrane emp24 domain-containing protein 9                                                                 | 1.37 | 0.060 | 6.8E-03 | 3  | 12.8 |
| O75306 | NADH dehydrogenase [ubiquinone] iron-sulfur protein 2, mitochondrial                                            | 1.37 | 0.382 | 1.3E-01 | 5  | 12.3 |
| P09669 | Cytochrome c oxidase subunit 6C                                                                                 | 1.37 | 0.218 | 8.5E-02 | 5  | 49.3 |
| Q71UM5 | 40S ribosomal protein S27-like                                                                                  | 1.36 | NA    | NA      | 2  | 23.8 |
| Q9NX63 | Coiled-coil-helix-coiled-coil-helix domain-containing protein 3, mitochondrial                                  | 1.36 | 0.025 | 2.3E-03 | 5  | 18.1 |
| P30048 | Thioredoxin-dependent peroxide reductase, mitochondrial                                                         | 1.36 | 0.165 | 8.6E-02 | 7  | 24.6 |
| O75367 | Core histone macro-H2A.1                                                                                        | 1.36 | 0.148 | 1.6E-02 | 8  | 24.2 |
| P49755 | Transmembrane emp24 domain-containing protein 10                                                                | 1.36 | 0.437 | 4.2E-01 | 3  | 19.2 |
| P18859 | ATP synthase-coupling factor 6, mitochondrial                                                                   | 1.36 | 0.336 | 1.7E-01 | 5  | 41.7 |
| P62277 | 40S ribosomal protein S13                                                                                       | 1.36 | 0.160 | 4.1E-02 | 6  | 29.1 |
| P09012 | U1 small nuclear ribonucleoprotein A                                                                            | 1.36 | NA    | NA      | 2  | 7.4  |
| P10809 | 60 kDa heat shock protein, mitochondrial                                                                        | 1.35 | 0.185 | 1.8E-01 | 12 | 22.5 |
| Q9P2E9 | Ribosome-binding protein 1                                                                                      | 1.35 | 0.144 | 3.6E-02 | 5  | 4.4  |
| O75947 | ATP synthase subunit d, mitochondrial                                                                           | 1.35 | 0.153 | 1.2E-01 | 6  | 28.6 |
| Q9Y224 | UPF0568 protein C14orf166                                                                                       | 1.35 | NA    | NA      | 2  | 11.1 |
| P50914 | 60S ribosomal protein L14                                                                                       | 1.35 | 0.226 | 3.6E-01 | 3  | 16.3 |
| P61353 | 60S ribosomal protein L27                                                                                       | 1.34 | 0.098 | 2.4E-02 | 3  | 27.9 |
| P29966 | Myristoylated alanine-rich C-kinase substrate                                                                   | 1.34 | 0.405 | 1.5E-01 | 4  | 22.0 |
| P46940 | Ras GTPase-activating-like protein IQGAP1                                                                       | 1.34 | 0.133 | 1.7E-02 | 12 | 9.1  |
| O00567 | Nucleolar protein 56                                                                                            | 1.34 | 0.067 | 2.5E-02 | 4  | 7.2  |
| P50502 | Hsc70-interacting protein                                                                                       | 1.34 | 0.132 | 9.2E-02 | 4  | 10.8 |
| O15212 | Prefoldin subunit 6                                                                                             | 1.34 | NA    | NA      | 2  | 14.0 |
| P11940 | Polyadenylate-binding protein 1                                                                                 | 1.33 | 0.143 | 5.5E-02 | 6  | 12.3 |
| Q9P016 | Thymocyte nuclear protein 1                                                                                     | 1.33 | 0.075 | 8.9E-02 | 3  | 11.6 |
| P60866 | 40S ribosomal protein S20                                                                                       | 1.33 | NA    | NA      | 2  | 19.3 |
| P31949 | Protein S100-A11                                                                                                | 1.33 | 0.186 | 1.3E-01 | 4  | 42.9 |
| P54136 | Arginine-tRNA ligase, cytoplasmic                                                                               | 1.33 | 0.225 | 1.5E-01 | 3  | 5.5  |
| Q8N2K0 | Monoacylglycerol lipase ABHD12                                                                                  | 1.32 | NA    | NA      | 2  | 5.3  |
| P04179 | Superoxide dismutase [Mn], mitochondrial                                                                        | 1.32 | 0.124 | 1.7E-01 | 7  | 24.3 |
| Q9NR28 | Diablo homolog, mitochondrial                                                                                   | 1.32 | NA    | NA      | 2  | 8.8  |
| O15145 | Actin-related protein 2/3 complex subunit 3                                                                     | 1.32 | NA    | NA      | 2  | 9.6  |
| P27816 | Microtubule-associated protein 4                                                                                | 1.32 | 0.184 | 2.2E-01 | 4  | 4.1  |
| P84103 | Serine/arginine-rich splicing factor 3                                                                          | 1.31 | 0.106 | 2.6E-02 | 3  | 20.7 |
| P05198 | Eukaryotic translation initiation factor 2 subunit 1                                                            | 1.31 | NA    | NA      | 2  | 7.0  |
| P51532 | Transcription activator BRG1                                                                                    | 1.31 | NA    | NA      | 2  | 1.7  |
| Q12874 | Splicing factor 3A subunit 3                                                                                    | 1.31 | NA    | NA      | 2  | 4.0  |
| P42766 | 60S ribosomal protein L35                                                                                       | 1.31 | NA    | NA      | 2  | 15.4 |
| P62979 | Ubiquitin-40S ribosomal protein S27a                                                                            | 1.31 | 0.068 | 8.8E-04 | 8  | 41.0 |
| P38117 | Electron transfer flavoprotein subunit beta                                                                     | 1.30 | 0.197 | 8.0E-02 | 7  | 22.4 |
| Q15691 | Microtubule-associated protein RP/EB family member 1                                                            | 1.30 | 0.158 | 1.5E-01 | 6  | 19.4 |
| P17844 | Probable ATP-dependent RNA helicase DDX5                                                                        | 1.30 | 0.033 | 7.4E-03 | 4  | 6.0  |
| Q9BWM7 | Sideroflexin-3                                                                                                  | 1.30 | NA    | NA      | 2  | 8.9  |
| P62191 | 26S protease regulatory subunit 4                                                                               | 1.30 | NA    | NA      | 2  | 5.0  |
| P02545 | Prelamin-A/C                                                                                                    | 1.29 | 0.048 | 5.9E-10 | 37 | 48.5 |
| Q9NSD9 | Phenylalanine-tRNA ligase beta subunit                                                                          | 1.29 | 0.072 | 1.4E-02 | 3  | 4.9  |
| P10644 | cAMP-dependent protein kinase type I-alpha regulatory subunit                                                   | 1.29 | 0.084 | 5.2E-02 | 4  | 12.1 |
| O00231 | 26S proteasome non-ATPase regulatory subunit 11                                                                 | 1.28 | 0.246 | 2.2E-01 | 5  | 11.8 |
| Q92841 | Probable ATP-dependent RNA helicase DDX17                                                                       | 1.28 | 0.062 | 5.4E-03 | 8  | 12.8 |
| P56556 | NADH dehydrogenase [ubiquinone] 1 alpha subcomplex subunit 6                                                    | 1.27 | NA    | NA      | 2  | 12.3 |
| P82909 | 28S ribosomal protein S36, mitochondrial                                                                        | 1.27 | 0.210 | 4.9E-01 | 3  | 36.9 |
| P30041 | Peroxioredoxin-6                                                                                                | 1.27 | 0.148 | 4.4E-02 | 7  | 25.0 |
| Q96GK7 | Fumarylacetoacetate hydrolase domain-containing protein 2A                                                      | 1.27 | 0.491 | 4.6E-01 | 3  | 13.1 |
| Q9Y394 | Dehydrogenase/reductase SDR family member 7                                                                     | 1.26 | NA    | NA      | 2  | 4.4  |
| Q8LJK1 | Chondroitin sulfate proteoglycan 4                                                                              | 1.26 | 0.161 | 2.1E-01 | 3  | 2.7  |
| Q16531 | DNA damage-binding protein 1                                                                                    | 1.26 | NA    | NA      | 2  | 1.4  |
| P61981 | 14-3-3 protein gamma                                                                                            | 1.26 | NA    | NA      | 2  | 9.7  |
| Q00765 | Receptor expression-enhancing protein 5                                                                         | 1.26 | NA    | NA      | 2  | 10.6 |
| Q92597 | Protein NDRG1                                                                                                   | 1.26 | 1.084 | 3.5E-01 | 4  | 12.9 |
| B5ME19 | Eukaryotic translation initiation factor 3 subunit C-like protein                                               | 1.25 | 0.066 | 2.7E-02 | 4  | 3.5  |
| Q9Y411 | Unconventional myosin-Va                                                                                        | 1.25 | NA    | NA      | 2  | 1.0  |
| P36957 | Dihydropolyllysine-residue succinyltransferase component of 2-oxoglutarate dehydrogenase complex, mitochondrial | 1.25 | 0.042 | 6.2E-04 | 5  | 12.8 |
| Q9UL46 | Proteasome activator complex subunit 2                                                                          | 1.25 | NA    | NA      | 2  | 11.3 |
| P30405 | Peptidyl-prolyl cis-trans isomerase F, mitochondrial                                                            | 1.25 | 0.452 | 7.5E-01 | 3  | 12.6 |
| Q01844 | RNA-binding protein EWS                                                                                         | 1.25 | NA    | NA      | 2  | 2.3  |
| P27635 | 60S ribosomal protein L10                                                                                       | 1.25 | NA    | NA      | 2  | 9.8  |
| Q9Y5X3 | Sorting nexin-5                                                                                                 | 1.25 | NA    | NA      | 2  | 3.7  |
| P13073 | Cytochrome c oxidase subunit 4 isoform 1, mitochondrial                                                         | 1.25 | 0.156 | 2.3E-01 | 4  | 25.4 |
| Q13423 | NAD(P) transhydrogenase, mitochondrial                                                                          | 1.24 | 0.155 | 2.1E-01 | 11 | 11.1 |
| P62424 | 60S ribosomal protein L7a                                                                                       | 1.24 | 0.253 | 4.1E-01 | 3  | 11.7 |
| P18124 | 60S ribosomal protein L7                                                                                        | 1.24 | 0.060 | 1.1E-03 | 4  | 12.1 |
| P60981 | Dextrin                                                                                                         | 1.24 | NA    | NA      | 2  | 11.5 |
| Q86U42 | Polyadenylate-binding protein 2                                                                                 | 1.23 | 0.043 | 4.1E-02 | 3  | 9.2  |
| Q13151 | Heterogeneous nuclear ribonucleoprotein A0                                                                      | 1.23 | 0.153 | 2.2E-01 | 3  | 7.5  |
| Q92598 | Heat shock protein 105 kDa                                                                                      | 1.22 | NA    | NA      | 2  | 2.2  |
| P08559 | Pyruvate dehydrogenase E1 component subunit alpha, somatic form, mitochondrial                                  | 1.22 | NA    | NA      | 2  | 6.2  |
| P50402 | Emerin                                                                                                          | 1.22 | 0.061 | 4.8E-02 | 5  | 21.3 |
| Q99584 | Protein S100-A13                                                                                                | 1.22 | 0.108 | 4.2E-02 | 5  | 41.8 |
| P23284 | Peptidyl-prolyl cis-trans isomerase B                                                                           | 1.22 | 0.050 | 4.1E-02 | 10 | 41.2 |
| P58876 | Histone H2B type 1-D                                                                                            | 1.22 | NA    | NA      | 2  | 7.9  |
| P62753 | 40S ribosomal protein S6                                                                                        | 1.22 | 0.198 | 3.4E-01 | 6  | 16.1 |
| Q8UNZ2 | NSFL1 cofactor p47                                                                                              | 1.22 | NA    | NA      | 2  | 7.8  |
| P61225 | Ras-related protein Rap-2b                                                                                      | 1.22 | NA    | NA      | 2  | 9.3  |
| Q9Y230 | RuvB-like 2                                                                                                     | 1.22 | NA    | NA      | 2  | 5.0  |
| P62913 | 60S ribosomal protein L11                                                                                       | 1.21 | 0.159 | 2.5E-01 | 3  | 16.9 |
| P05388 | 60S acidic ribosomal protein P0                                                                                 | 1.21 | NA    | NA      | 2  | 6.6  |
| P46779 | 60S ribosomal protein L28                                                                                       | 1.21 | 0.034 | 8.5E-02 | 3  | 19.0 |
| Q9Y3U8 | 60S ribosomal protein L36                                                                                       | 1.20 | 0.039 | 1.4E-03 | 4  | 30.5 |
| P51572 | B-cell receptor-associated protein 31                                                                           | 1.20 | 0.193 | 3.3E-01 | 9  | 31.7 |
| P62318 | Small nuclear ribonucleoprotein Sm D3                                                                           | 1.20 | NA    | NA      | 2  | 24.6 |
| O75340 | Programmed cell death protein 6                                                                                 | 1.20 | NA    | NA      | 2  | 9.9  |
| Q9Y3E1 | Hepatoma-derived growth factor-related protein 3                                                                | 1.20 | 0.405 | 5.9E-01 | 3  | 15.8 |
| O43169 | Cytochrome b5 type B                                                                                            | 1.20 | NA    | NA      | 2  | 21.2 |
| P11216 | Glycogen phosphorylase, brain form                                                                              | 1.20 | 0.226 | 1.7E-01 | 8  | 11.6 |
| Q15293 | Reticulocalbin-1                                                                                                | 1.19 | 0.180 | 2.2E-01 | 4  | 10.3 |
| P11586 | C-1-tetrahydrofolate synthase, cytoplasmic                                                                      | 1.19 | 0.100 | 4.1E-02 | 5  | 5.6  |
| P27144 | Adenylate kinase 4, mitochondrial                                                                               | 1.19 | NA    | NA      | 2  | 9.9  |
| Q02543 | 60S ribosomal protein L18a                                                                                      | 1.19 | 0.215 | 5.3E-01 | 3  | 17.0 |
| Q9BR76 | Coronin-1B                                                                                                      | 1.18 | NA    | NA      | 2  | 3.9  |
| P45880 | Voltage-dependent anion-selective channel protein 2                                                             | 1.18 | 0.131 | 6.5E-02 | 8  | 27.2 |
| P63244 | Guanine nucleotide-binding protein subunit beta-2-like 1                                                        | 1.18 | 0.223 | 5.1E-01 | 4  | 13.2 |
| Q99623 | Prohibitin-2                                                                                                    | 1.18 | 0.068 | 2.2E-02 | 8  | 28.4 |
| P62910 | 60S ribosomal protein L32                                                                                       | 1.18 | NA    | NA      | 2  | 21.5 |
| Q9Y3Z3 | Deoxynucleoside triphosphate triphosphohydrolase SAMHD1                                                         | 1.18 | 0.093 | 1.0E-01 | 4  | 6.5  |
| P13674 | Prolyl 4-hydroxylase subunit alpha-1                                                                            | 1.17 | 0.491 | 6.0E-01 | 3  | 7.3  |
| P62280 | 40S ribosomal protein S11                                                                                       | 1.17 | 0.135 | 3.0E-01 | 4  | 20.9 |
| P15153 | Ras-related C3 botulinum toxin substrate 2                                                                      | 1.17 | NA    | NA      | 2  | 9.4  |
| Q92499 | ATP-dependent RNA helicase DDX1                                                                                 | 1.17 | 0.145 | 1.9E-01 | 4  | 5.7  |
| P14927 | Cytochrome b-c1 complex subunit 7                                                                               | 1.17 | 0.136 | 2.5E-01 | 5  | 40.5 |
| P22695 | Cytochrome b-c1 complex subunit 2, mitochondrial                                                                | 1.17 | 0.242 | 1.7E-01 | 6  | 18.8 |

Table S5-Sample UM30

|        |                                                                                                      |      |       |         |    |      |
|--------|------------------------------------------------------------------------------------------------------|------|-------|---------|----|------|
| Q86UP2 | Kinectin                                                                                             | 1.17 | 0.113 | 9.2E-02 | 10 | 9.1  |
| P46778 | 60S ribosomal protein L21                                                                            | 1.17 | NA    | NA      | 2  | 16.9 |
| Q9Y262 | Eukaryotic translation initiation factor 3 subunit L                                                 | 1.17 | 0.141 | 2.4E-01 | 4  | 6.6  |
| P62249 | 40S ribosomal protein S16                                                                            | 1.17 | 0.046 | 1.2E-02 | 3  | 21.2 |
| Q9UJ17 | GTP-AMP phosphotransferase AK3, mitochondrial                                                        | 1.16 | NA    | NA      | 2  | 11.0 |
| Q3ZCQ8 | Mitochondrial import inner membrane translocase subunit TIM50                                        | 1.16 | NA    | NA      | 2  | 5.1  |
| P53618 | Coatomer subunit beta                                                                                | 1.16 | 0.120 | 4.3E-01 | 3  | 4.0  |
| P30519 | Heme oxygenase 2                                                                                     | 1.16 | NA    | NA      | 2  | 10.1 |
| P30101 | Protein disulfide-isomerase A3                                                                       | 1.16 | 0.098 | 6.9E-02 | 14 | 29.1 |
| Q13242 | Serine/arginine-rich splicing factor 9                                                               | 1.16 | NA    | NA      | 2  | 9.5  |
| O15173 | Membrane-associated progesterone receptor component 2                                                | 1.15 | 0.481 | 5.6E-01 | 4  | 22.0 |
| P49327 | Fatty acid synthase                                                                                  | 1.15 | 0.193 | 3.2E-01 | 4  | 1.8  |
| Q8IX12 | Cell division cycle and apoptosis regulator protein 1                                                | 1.15 | 0.403 | 4.8E-01 | 3  | 3.1  |
| P23396 | 40S ribosomal protein S3                                                                             | 1.15 | 0.065 | 1.4E-02 | 8  | 30.0 |
| P07237 | Protein disulfide-isomerase                                                                          | 1.14 | 0.305 | 4.5E-01 | 16 | 27.4 |
| P55145 | Mesencephalic astrocyte-derived neurotrophic factor                                                  | 1.14 | NA    | NA      | 2  | 15.4 |
| Q15029 | 116 kDa U5 small nuclear ribonucleoprotein component                                                 | 1.14 | 1.850 | 4.9E-01 | 3  | 3.7  |
| P31040 | Succinate dehydrogenase [ubiquinone] flavoprotein subunit, mitochondrial                             | 1.13 | 0.313 | 2.7E-01 | 4  | 8.0  |
| P06576 | ATP synthase subunit beta, mitochondrial                                                             | 1.12 | 0.050 | 6.4E-02 | 14 | 33.5 |
| Q1KMD3 | Heterogeneous nuclear ribonucleoprotein U-like protein 2                                             | 1.12 | 0.400 | 5.4E-01 | 3  | 3.1  |
| P50991 | T-complex protein 1 subunit delta                                                                    | 1.12 | 0.264 | 3.3E-01 | 4  | 8.5  |
| Q06830 | Peroxioredoxin-1                                                                                     | 1.12 | 0.139 | 8.4E-02 | 8  | 43.2 |
| Q8N1G4 | Leucine-rich repeat-containing protein 47                                                            | 1.12 | 0.290 | 4.6E-01 | 4  | 8.6  |
| Q15942 | Zyxin                                                                                                | 1.11 | 1.037 | 8.3E-01 | 3  | 7.2  |
| P11177 | Pyruvate dehydrogenase E1 component subunit beta, mitochondrial                                      | 1.11 | NA    | NA      | 2  | 4.2  |
| P62701 | 40S ribosomal protein S4, X isoform                                                                  | 1.11 | 0.214 | 4.5E-01 | 7  | 24.0 |
| Q9ULV4 | Coronin-1C                                                                                           | 1.11 | NA    | NA      | 2  | 4.9  |
| P02774 | Vitamin D-binding protein                                                                            | 1.11 | 0.212 | 5.6E-01 | 6  | 10.1 |
| Q93050 | V-type proton ATPase 116 kDa subunit a isoform 1                                                     | 1.11 | NA    | NA      | 2  | 2.5  |
| O15118 | Niemann-Pick C1 protein                                                                              | 1.10 | NA    | NA      | 2  | 1.2  |
| P27824 | Calnexin                                                                                             | 1.10 | 1.316 | 5.6E-01 | 10 | 17.4 |
| P18621 | 60S ribosomal protein L17                                                                            | 1.10 | NA    | NA      | 2  | 10.9 |
| Q86TX2 | Acyl-coenzyme A thioesterase 1                                                                       | 1.10 | NA    | NA      | 2  | 5.2  |
| P48643 | T-complex protein 1 subunit epsilon                                                                  | 1.10 | 0.218 | 3.8E-01 | 10 | 15.9 |
| Q13310 | Polyadenylate-binding protein 4                                                                      | 1.09 | NA    | NA      | 2  | 4.2  |
| Q562E7 | WD repeat-containing protein 81                                                                      | 1.09 | NA    | NA      | 2  | 2.0  |
| P08134 | Rho-related GTP-binding protein RhoC                                                                 | 1.09 | 0.102 | 2.5E-01 | 3  | 10.4 |
| P00403 | Cytochrome c oxidase subunit 2                                                                       | 1.09 | 0.686 | 5.6E-01 | 3  | 14.5 |
| P09874 | Poly [ADP-ribose] polymerase 1                                                                       | 1.09 | 0.084 | 2.3E-01 | 8  | 8.9  |
| Q9NSE4 | Isoleucine-tRNA ligase, mitochondrial                                                                | 1.09 | 0.434 | 6.9E-01 | 5  | 6.8  |
| P15880 | 40S ribosomal protein S2                                                                             | 1.09 | 0.185 | 5.8E-01 | 4  | 13.7 |
| P47985 | Cytochrome b-c1 complex subunit Rieske, mitochondrial                                                | 1.09 | NA    | NA      | 2  | 8.0  |
| P21281 | V-type proton ATPase subunit B, brain isoform                                                        | 1.09 | 7.616 | 5.8E-01 | 5  | 11.7 |
| P10515 | Dihydropyridine-residue acetyltransferase component of pyruvate dehydrogenase complex, mitochondrial | 1.09 | 0.107 | 4.6E-01 | 4  | 5.1  |
| Q9UBQ0 | Vacuolar protein sorting-associated protein 29                                                       | 1.09 | NA    | NA      | 2  | 9.3  |
| P42765 | 3-ketoacyl-CoA thiolase, mitochondrial                                                               | 1.09 | 0.605 | 6.2E-01 | 4  | 11.6 |
| Q13561 | Dynactin subunit 2                                                                                   | 1.08 | 0.203 | 5.7E-01 | 5  | 14.0 |
| O00203 | AP-3 complex subunit beta-1                                                                          | 1.08 | NA    | NA      | 2  | 2.6  |
| Q13488 | V-type proton ATPase 116 kDa subunit a isoform 3                                                     | 1.08 | NA    | NA      | 2  | 3.5  |
| O60262 | Guanine nucleotide-binding protein G(I)/G(S)/G(O) subunit gamma-7                                    | 1.08 | NA    | NA      | 2  | 30.9 |
| O75165 | DnaJ homolog subfamily C member 13                                                                   | 1.08 | 3.569 | 8.9E-01 | 3  | 1.3  |
| P31689 | DnaJ homolog subfamily A member 1                                                                    | 1.07 | NA    | NA      | 2  | 4.8  |
| Q14980 | Nuclear mitotic apparatus protein 1                                                                  | 1.07 | 1.424 | 5.9E-01 | 8  | 4.9  |
| P31930 | Cytochrome b-c1 complex subunit 1, mitochondrial                                                     | 1.07 | 0.111 | 2.2E-01 | 3  | 7.7  |
| P60228 | Eukaryotic translation initiation factor 3 subunit E                                                 | 1.06 | NA    | NA      | 2  | 3.8  |
| O94826 | Mitochondrial import receptor subunit TOM70                                                          | 1.06 | NA    | NA      | 2  | 4.4  |
| P35998 | 26S protease regulatory subunit 7                                                                    | 1.06 | NA    | NA      | 2  | 5.8  |
| P28838 | Cytosol aminopeptidase                                                                               | 1.06 | 1.687 | 8.9E-01 | 4  | 8.7  |
| P39023 | 60S ribosomal protein L3                                                                             | 1.05 | 0.089 | 7.0E-01 | 3  | 6.7  |
| O60763 | General vesicular transport factor p115                                                              | 1.05 | 0.551 | 8.2E-01 | 3  | 2.3  |
| P21912 | Succinate dehydrogenase [ubiquinone] iron-sulfur subunit, mitochondrial                              | 1.05 | 0.243 | 5.0E-01 | 4  | 15.0 |
| O75643 | U5 small nuclear ribonucleoprotein 200 kDa helicase                                                  | 1.05 | 0.613 | 7.5E-01 | 4  | 1.9  |
| O75396 | Vesicle-trafficking protein SEC22b                                                                   | 1.05 | NA    | NA      | 2  | 12.6 |
| P78371 | T-complex protein 1 subunit beta                                                                     | 1.05 | 0.232 | 6.3E-01 | 3  | 7.5  |
| Q14165 | Malectin                                                                                             | 1.04 | 1.937 | 5.7E-01 | 3  | 11.6 |
| P31943 | Heterogeneous nuclear ribonucleoprotein H                                                            | 1.04 | NA    | NA      | 2  | 3.3  |
| P38606 | V-type proton ATPase catalytic subunit A                                                             | 1.04 | 0.294 | 7.0E-01 | 4  | 6.6  |
| Q13162 | Peroxioredoxin-4                                                                                     | 1.04 | 0.049 | 3.5E-01 | 3  | 12.9 |
| P15311 | Ezrin                                                                                                | 1.03 | 0.112 | 6.1E-01 | 5  | 6.5  |
| P24752 | Acetyl-CoA acetyltransferase, mitochondrial                                                          | 1.03 | 0.103 | 6.8E-01 | 5  | 12.6 |
| P61026 | Ras-related protein Rab-10                                                                           | 1.02 | NA    | NA      | 2  | 9.0  |
| Q9UJZ1 | Stomatin-like protein 2, mitochondrial                                                               | 1.02 | NA    | NA      | 2  | 7.3  |
| P35637 | RNA-binding protein FUS                                                                              | 1.02 | 1.923 | 9.3E-01 | 5  | 8.6  |
| P40227 | T-complex protein 1 subunit zeta                                                                     | 1.02 | 0.460 | 9.0E-01 | 3  | 6.6  |
| P62917 | 60S ribosomal protein L8                                                                             | 1.02 | NA    | NA      | 2  | 7.0  |
| P48735 | Isocitrate dehydrogenase [NADP], mitochondrial                                                       | 1.02 | 0.178 | 8.6E-01 | 6  | 14.6 |
| Q9P0L0 | Vesicle-associated membrane protein-associated protein A                                             | 1.01 | NA    | NA      | 2  | 10.0 |
| P26038 | Moesin                                                                                               | 1.01 | 0.612 | 8.7E-01 | 12 | 16.8 |
| P24539 | ATP synthase F(0) complex subunit B1, mitochondrial                                                  | 1.01 | NA    | NA      | 2  | 9.0  |
| Q13596 | Sorting nexin-1                                                                                      | 1.01 | NA    | NA      | 2  | 5.2  |
| P51148 | Ras-related protein Rab-5C                                                                           | 1.01 | NA    | NA      | 2  | 10.6 |
| Q99733 | Nucleosome assembly protein 1-like 4                                                                 | 1.00 | NA    | NA      | 2  | 5.9  |
| P25705 | ATP synthase subunit alpha, mitochondrial                                                            | 1.00 | 0.147 | 9.3E-01 | 16 | 30.2 |
| P32969 | 60S ribosomal protein L9                                                                             | 1.00 | 0.214 | 9.7E-01 | 4  | 15.1 |
| Q9UQE7 | Structural maintenance of chromosomes protein 3                                                      | 1.00 | 0.282 | 1.0E+00 | 3  | 3.1  |
| Q99653 | Calcineurin B homologous protein 1                                                                   | 1.00 | 0.101 | 9.9E-01 | 3  | 19.0 |
| P43686 | 26S protease regulatory subunit 6B                                                                   | 1.00 | NA    | NA      | 2  | 6.0  |
| P55084 | Trifunctional enzyme subunit beta, mitochondrial                                                     | 1.00 | 1.040 | 9.6E-01 | 9  | 14.6 |
| P01009 | Alpha-1-antitrypsin                                                                                  | 0.99 | 0.288 | 9.4E-01 | 11 | 30.9 |
| P62244 | 40S ribosomal protein S15a                                                                           | 0.99 | 0.795 | 9.7E-01 | 3  | 18.5 |
| P46109 | Crik-like protein                                                                                    | 0.99 | 1.032 | 9.6E-01 | 3  | 16.2 |
| P59998 | Actin-related protein 2/3 complex subunit 4                                                          | 0.98 | 0.263 | 8.5E-01 | 3  | 16.1 |
| P23919 | Thymidylate kinase                                                                                   | 0.98 | NA    | NA      | 2  | 13.2 |
| P09496 | Claithrin light chain A                                                                              | 0.98 | NA    | NA      | 2  | 5.6  |
| O00264 | Membrane-associated progesterone receptor component 1                                                | 0.98 | NA    | NA      | 2  | 7.7  |
| O43390 | Heterogeneous nuclear ribonucleoprotein R                                                            | 0.98 | 0.438 | 8.0E-01 | 6  | 9.3  |
| Q16891 | Mitochondrial inner membrane protein                                                                 | 0.98 | 1.019 | 7.9E-01 | 9  | 14.9 |
| Q9Y512 | Sorting and assembly machinery component 50 homolog                                                  | 0.97 | NA    | NA      | 2  | 5.5  |
| P37235 | Hippocalcin-like protein 1                                                                           | 0.97 | 0.562 | 9.3E-01 | 3  | 16.6 |
| P18077 | 60S ribosomal protein L35a                                                                           | 0.97 | 1.562 | 8.4E-01 | 3  | 20.0 |
| P54709 | Sodium/potassium-transporting ATPase subunit beta-3                                                  | 0.97 | 0.105 | 7.5E-01 | 6  | 20.8 |
| P55884 | Eukaryotic translation initiation factor 3 subunit B                                                 | 0.97 | NA    | NA      | 2  | 2.2  |
| P26196 | Probable ATP-dependent RNA helicase DDX6                                                             | 0.97 | NA    | NA      | 2  | 6.4  |
| P30153 | Serine/threonine-protein phosphatase 2A 65 kDa regulatory subunit A alpha isoform                    | 0.96 | NA    | NA      | 2  | 4.8  |
| O95479 | GDH6PGL endoplasmic bifunctional protein                                                             | 0.96 | NA    | NA      | 2  | 2.7  |
| P01860 | Ig gamma-3 chain C region                                                                            | 0.96 | 0.252 | 8.1E-01 | 3  | 6.4  |
| Q9UHQ9 | NADH-cytochrome b5 reductase 1                                                                       | 0.96 | 0.513 | 7.0E-01 | 4  | 15.1 |
| P36542 | ATP synthase subunit gamma, mitochondrial                                                            | 0.96 | 0.250 | 6.4E-01 | 3  | 9.4  |
| P40429 | 60S ribosomal protein L13a                                                                           | 0.96 | 1.787 | 8.4E-01 | 5  | 23.6 |
| Q02218 | 2-oxoglutarate dehydrogenase, mitochondrial                                                          | 0.96 | 0.140 | 3.9E-01 | 8  | 9.5  |
| P49368 | T-complex protein 1 subunit gamma                                                                    | 0.95 | 0.201 | 4.8E-01 | 6  | 11.6 |
| O94874 | E3 UFM1-protein ligase 1                                                                             | 0.95 | NA    | NA      | 2  | 2.8  |
| Q92905 | COP9 signalosome complex subunit 5                                                                   | 0.95 | NA    | NA      | 2  | 6.9  |
| P01859 | Ig gamma-2 chain C region                                                                            | 0.95 | 0.077 | 5.9E-01 | 3  | 12.0 |
| O95881 | Thioredoxin domain-containing protein 12                                                             | 0.95 | NA    | NA      | 2  | 14.0 |

Table S5-Sample UM30

|        |                                                                               |      |       |         |    |      |
|--------|-------------------------------------------------------------------------------|------|-------|---------|----|------|
| Q92896 | Golgi apparatus protein 1                                                     | 0.94 | NA    | NA      | 2  | 1.7  |
| Q27J81 | Inverted formin-2                                                             | 0.94 | 0.106 | 4.9E-01 | 3  | 2.5  |
| Q9UNH7 | Sorting nexin-6                                                               | 0.94 | 0.224 | 7.7E-01 | 3  | 5.2  |
| P51812 | Ribosomal protein S6 kinase alpha-3                                           | 0.93 | NA    | NA      | 2  | 2.8  |
| P23786 | Carnitine O-palmitoyltransferase 2, mitochondrial                             | 0.93 | NA    | NA      | 2  | 3.2  |
| P51798 | H(+)/Cl(-) exchange transporter 7                                             | 0.93 | NA    | NA      | 2  | 4.0  |
| P61160 | Actin-related protein 2                                                       | 0.93 | 1.396 | 6.4E-01 | 4  | 14.2 |
| Q02252 | Methylmalonate-semialdehyde dehydrogenase [acylating], mitochondrial          | 0.93 | NA    | NA      | 2  | 3.9  |
| Q02878 | 60S ribosomal protein L6                                                      | 0.93 | 0.195 | 2.9E-01 | 7  | 23.3 |
| P01023 | Alpha-2-macroglobulin                                                         | 0.92 | 0.123 | 4.0E-01 | 7  | 5.7  |
| P84098 | 60S ribosomal protein L19                                                     | 0.92 | NA    | NA      | 2  | 8.7  |
| P62805 | Histone H4                                                                    | 0.92 | 0.107 | 1.3E-01 | 7  | 52.4 |
| P11021 | 78 kDa glucose-regulated protein                                              | 0.92 | 0.098 | 1.5E-01 | 17 | 26.8 |
| Q93009 | Ubiquitin carboxyl-terminal hydrolase 7                                       | 0.92 | NA    | NA      | 2  | 1.5  |
| P22061 | Protein-L-isoaspartate(D-aspartate) O-methyltransferase                       | 0.92 | NA    | NA      | 2  | 11.5 |
| Q15084 | Protein disulfide-isomerase A6                                                | 0.91 | 0.168 | 3.4E-01 | 6  | 15.7 |
| P35222 | Catenin beta-1                                                                | 0.91 | 0.036 | 1.6E-01 | 4  | 6.1  |
| Q12797 | Aspartyl/asparaginyl beta-hydroxylase                                         | 0.91 | 0.212 | 4.5E-01 | 6  | 5.8  |
| Q00325 | Phosphate carrier protein, mitochondrial                                      | 0.91 | 0.118 | 2.7E-01 | 6  | 16.0 |
| Q00577 | Transcriptional activator protein Pur-alpha                                   | 0.91 | 0.355 | 6.3E-01 | 3  | 6.8  |
| Q7KZF4 | Staphylococcal nuclease domain-containing protein 1                           | 0.91 | 0.745 | 5.4E-01 | 4  | 6.8  |
| P35813 | Protein phosphatase 1A                                                        | 0.91 | NA    | NA      | 2  | 6.8  |
| Q9UNF0 | Protein kinase C and casein kinase substrate in neurons protein 2             | 0.90 | 0.135 | 4.2E-01 | 4  | 9.1  |
| P46781 | 40S ribosomal protein S9                                                      | 0.90 | 0.546 | 3.3E-01 | 6  | 22.7 |
| Q8NBS9 | Thioredoxin domain-containing protein 5                                       | 0.90 | 0.237 | 6.7E-01 | 5  | 13.0 |
| Q99832 | T-complex protein 1 subunit eta                                               | 0.90 | 0.131 | 1.2E-01 | 8  | 14.5 |
| P01903 | HLA class II histocompatibility antigen, DR alpha chain                       | 0.90 | 0.223 | 3.7E-01 | 4  | 21.3 |
| Q9UHD8 | Septin-9                                                                      | 0.90 | 0.259 | 4.9E-01 | 6  | 10.8 |
| Q16795 | NADH dehydrogenase [ubiquinone] 1 alpha subcomplex subunit 9, mitochondrial   | 0.89 | NA    | NA      | 2  | 6.4  |
| Q9BS26 | Endoplasmic reticulum resident protein 44                                     | 0.89 | 0.101 | 1.9E-01 | 4  | 10.1 |
| Q75964 | ATP synthase subunit g, mitochondrial                                         | 0.89 | NA    | NA      | 2  | 27.2 |
| P50990 | T-complex protein 1 subunit theta                                             | 0.89 | 0.075 | 1.6E-02 | 11 | 19.0 |
| Q14697 | Neutral alpha-glucosidase AB                                                  | 0.89 | 0.134 | 1.0E-01 | 11 | 10.3 |
| P01911 | HLA class II histocompatibility antigen, DRB1-15 beta chain                   | 0.88 | 0.298 | 7.2E-01 | 3  | 9.8  |
| P11310 | Medium-chain specific acyl-CoA dehydrogenase, mitochondrial                   | 0.88 | 0.355 | 5.0E-01 | 3  | 8.3  |
| Q7L5N1 | COP9 signalosome complex subunit 6                                            | 0.88 | NA    | NA      | 2  | 8.0  |
| P02647 | Apolipoprotein A-I                                                            | 0.88 | 0.090 | 8.9E-02 | 7  | 25.1 |
| P43304 | Glycerol-3-phosphate dehydrogenase, mitochondrial                             | 0.88 | 0.103 | 1.5E-01 | 5  | 8.0  |
| P61158 | Actin-related protein 3                                                       | 0.88 | 0.232 | 3.6E-01 | 4  | 9.8  |
| Q9H444 | Charged multivesicular body protein 4b                                        | 0.88 | NA    | NA      | 2  | 8.9  |
| P02652 | Apolipoprotein A-II                                                           | 0.88 | 0.780 | 6.2E-01 | 3  | 19.0 |
| P38919 | Eukaryotic initiation factor 4A-III                                           | 0.87 | NA    | NA      | 2  | 6.3  |
| P35221 | Catenin alpha-1                                                               | 0.87 | 0.122 | 1.9E-01 | 7  | 8.2  |
| Q14258 | E3 ubiquitin/ISG15 ligase TRIM25                                              | 0.87 | NA    | NA      | 2  | 3.8  |
| P04632 | Calpain small subunit 1                                                       | 0.87 | NA    | NA      | 2  | 6.3  |
| Q96QK1 | Vacuolar protein sorting-associated protein 35                                | 0.86 | NA    | NA      | 2  | 3.1  |
| Q9P2R3 | Ankyrin repeat and FYVE domain-containing protein 1                           | 0.86 | NA    | NA      | 2  | 2.7  |
| Q9Y310 | tRNA-splicing ligase RtcB homolog                                             | 0.86 | 0.178 | 7.3E-01 | 3  | 7.5  |
| P49748 | Very long-chain specific acyl-CoA dehydrogenase, mitochondrial                | 0.86 | 0.095 | 3.8E-02 | 5  | 7.0  |
| P55072 | Transitional endoplasmic reticulum ATPase                                     | 0.85 | 0.046 | 5.3E-04 | 13 | 15.4 |
| P25685 | DnaJ homolog subfamily B member 1                                             | 0.85 | NA    | NA      | 2  | 5.6  |
| Q6P2Q9 | Pre-mRNA-processing-splicing factor 8                                         | 0.84 | NA    | NA      | 2  | 0.7  |
| O15511 | Actin-related protein 2/3 complex subunit 5                                   | 0.84 | NA    | NA      | 2  | 11.9 |
| P41222 | Prostaglandin-H2 D-isomerase                                                  | 0.84 | NA    | NA      | 2  | 12.1 |
| O15144 | Actin-related protein 2/3 complex subunit 2                                   | 0.84 | 0.178 | 2.0E-01 | 4  | 12.3 |
| Q9NZ08 | Endoplasmic reticulum aminopeptidase 1                                        | 0.84 | 0.470 | 4.2E-01 | 3  | 3.0  |
| Q9HBL7 | Plasminogen receptor (KT)                                                     | 0.83 | NA    | NA      | 2  | 13.6 |
| P46459 | Vesicle-fusing ATPase                                                         | 0.83 | 0.051 | 1.9E-02 | 4  | 6.0  |
| P17987 | T-complex protein 1 subunit alpha                                             | 0.83 | 0.128 | 6.0E-02 | 7  | 14.2 |
| O60716 | Catenin delta-1                                                               | 0.82 | 0.218 | 3.3E-01 | 4  | 4.9  |
| P29590 | Protein PML                                                                   | 0.82 | NA    | NA      | 2  | 2.3  |
| Q13228 | Selenium-binding protein 1                                                    | 0.82 | NA    | NA      | 2  | 4.4  |
| P39656 | Dolichyl-diphosphooligosaccharide--protein glycosyltransferase 48 kDa subunit | 0.82 | 0.182 | 3.3E-01 | 5  | 10.1 |
| P46977 | Dolichyl-diphosphooligosaccharide--protein glycosyltransferase subunit STT3A  | 0.82 | NA    | NA      | 2  | 2.3  |
| P49419 | Alpha-aminoadipic semialdehyde dehydrogenase                                  | 0.82 | 0.503 | 5.1E-01 | 3  | 7.1  |
| P60953 | Cell division control protein 42 homolog                                      | 0.81 | NA    | NA      | 2  | 11.0 |
| Q8WVC6 | Dephospho-CoA kinase domain-containing protein                                | 0.81 | NA    | NA      | 2  | 10.8 |
| P69905 | Hemoglobin subunit alpha                                                      | 0.81 | 0.135 | 1.8E-02 | 5  | 34.5 |
| Q9HBL0 | Tensin-1                                                                      | 0.80 | 2.451 | 4.0E-01 | 4  | 3.3  |
| Q16270 | Insulin-like growth factor-binding protein 7                                  | 0.80 | NA    | NA      | 2  | 10.3 |
| Q13200 | 26S proteasome non-ATPase regulatory subunit 2                                | 0.80 | 0.123 | 1.8E-01 | 3  | 3.4  |
| P20700 | Lamin-B1                                                                      | 0.80 | 3.183 | 3.0E-01 | 7  | 13.5 |
| P19367 | Hexokinase-1                                                                  | 0.80 | NA    | NA      | 2  | 2.1  |
| P54920 | Alpha-soluble NSF attachment protein                                          | 0.80 | 0.122 | 1.1E-01 | 5  | 19.7 |
| P04843 | Dolichyl-diphosphooligosaccharide--protein glycosyltransferase subunit 1      | 0.80 | 0.120 | 7.6E-03 | 12 | 21.1 |
| P43490 | Nicotinamide phosphoribosyltransferase                                        | 0.79 | NA    | NA      | 2  | 4.1  |
| Q94911 | ATP-binding cassette sub-family A member 8                                    | 0.79 | 0.300 | 5.4E-01 | 5  | 3.0  |
| P0C0S8 | Histone H2A type 1                                                            | 0.79 | NA    | NA      | 2  | 23.1 |
| P05107 | Integrin beta-2                                                               | 0.78 | NA    | NA      | 2  | 2.3  |
| P40939 | Trifunctional enzyme subunit alpha, mitochondrial                             | 0.78 | 0.106 | 4.1E-02 | 14 | 19.7 |
| O94832 | Unconventional myosin-Ib                                                      | 0.78 | 0.160 | 2.0E-01 | 6  | 6.6  |
| Q99442 | Translocation protein SEC62                                                   | 0.77 | 0.036 | 2.4E-02 | 3  | 7.3  |
| P47756 | F-actin-capping protein subunit beta                                          | 0.77 | 0.109 | 4.8E-02 | 6  | 23.1 |
| P01857 | Ig gamma-1 chain C region                                                     | 0.77 | 0.051 | 8.7E-04 | 3  | 13.0 |
| Q9BSD7 | Cancer-related nucleoside-triphosphatase                                      | 0.77 | NA    | NA      | 2  | 8.9  |
| P50454 | Serpin H1                                                                     | 0.76 | 0.074 | 8.7E-02 | 5  | 14.4 |
| Q09666 | Neuroblast differentiation-associated protein AHNK                            | 0.75 | 0.038 | 3.7E-07 | 91 | 14.2 |
| O43707 | Alpha-actinin-4                                                               | 0.75 | 0.045 | 1.7E-06 | 21 | 26.3 |
| P12235 | ADP/ATP translocase 1                                                         | 0.74 | NA    | NA      | 2  | 6.7  |
| P27797 | Calreticulin                                                                  | 0.74 | 0.430 | 4.2E-01 | 6  | 13.9 |
| P48681 | Nestin                                                                        | 0.74 | 0.433 | 3.8E-01 | 3  | 2.4  |
| P53621 | Coatamer subunit alpha                                                        | 0.74 | 0.100 | 6.1E-02 | 5  | 4.4  |
| P68871 | Hemoglobin subunit beta                                                       | 0.73 | 0.062 | 1.1E-04 | 5  | 44.9 |
| O94979 | Protein transport protein Sec31A                                              | 0.73 | 0.165 | 1.3E-01 | 5  | 5.2  |
| Q16695 | Histone H3.1t                                                                 | 0.72 | 0.066 | 1.0E-02 | 5  | 25.7 |
| P35580 | Myosin-10                                                                     | 0.72 | 0.092 | 2.6E-03 | 16 | 9.2  |
| P00367 | Glutamate dehydrogenase 1, mitochondrial                                      | 0.72 | 0.081 | 1.6E-03 | 6  | 12.0 |
| Q14204 | Cytoplasmic dynein 1 heavy chain 1                                            | 0.72 | 0.040 | 1.5E-07 | 27 | 6.2  |
| Q14203 | Dynactin subunit 1                                                            | 0.72 | 0.108 | 1.6E-01 | 3  | 3.1  |
| Q969X5 | Endoplasmic reticulum-Golgi intermediate compartment protein 1                | 0.72 | 0.228 | 2.3E-01 | 3  | 11.0 |
| Q13283 | Ras GTPase-activating protein-binding protein 1                               | 0.71 | NA    | NA      | 2  | 7.3  |
| P10321 | HLA class I histocompatibility antigen, Cw-7 alpha chain                      | 0.71 | 0.206 | 4.7E-01 | 4  | 13.1 |
| P09382 | Galectin-1                                                                    | 0.70 | 0.051 | 2.2E-04 | 5  | 43.7 |
| Q07065 | Cytoskeleton-associated protein 4                                             | 0.70 | 0.118 | 4.4E-02 | 5  | 11.0 |
| P16435 | NADPH--cytochrome P450 reductase                                              | 0.70 | NA    | NA      | 2  | 2.5  |
| P16615 | Sarcoplasmic/endoplasmic reticulum calcium ATPase 2                           | 0.69 | 0.077 | 5.1E-03 | 8  | 8.7  |
| P0C0S5 | Histone H2A.Z                                                                 | 0.69 | NA    | NA      | 2  | 18.8 |
| Q9Y639 | Neuroplastin                                                                  | 0.69 | NA    | NA      | 2  | 4.8  |
| Q9Y4L1 | Hypoxia up-regulated protein 1                                                | 0.69 | 0.077 | 1.5E-01 | 4  | 4.1  |
| P50995 | Annexin A11                                                                   | 0.69 | 0.073 | 2.8E-03 | 6  | 11.1 |
| P06727 | Apolipoprotein A-IV                                                           | 0.69 | 0.092 | 6.2E-04 | 11 | 25.8 |
| Q86WV6 | Stimulator of interferon genes protein                                        | 0.68 | NA    | NA      | 2  | 5.8  |
| P17931 | Galectin-3                                                                    | 0.68 | 0.094 | 2.4E-03 | 7  | 31.2 |
| P13667 | Protein disulfide-isomerase A4                                                | 0.68 | 0.026 | 4.4E-02 | 3  | 5.0  |
| P08237 | ATP-dependent 6-phosphofructokinase, muscle type                              | 0.68 | 0.018 | 2.8E-03 | 3  | 5.1  |

Table S5-Sample UM30

|        |                                                                          |      |       |         |    |      |
|--------|--------------------------------------------------------------------------|------|-------|---------|----|------|
| P17858 | ATP-dependent 6-phosphofructokinase, liver type                          | 0.67 | 0.078 | 7.2E-02 | 4  | 7.9  |
| Q5SSJ5 | Heterochromatin protein 1-binding protein 3                              | 0.67 | 0.173 | 5.4E-02 | 3  | 7.2  |
| Q8IUX7 | Adipocyte enhancer-binding protein 1                                     | 0.67 | NA    | NA      | 2  | 2.4  |
| P08107 | Heat shock 70 kDa protein 1A/1B                                          | 0.66 | 0.079 | 1.7E-02 | 7  | 12.6 |
| O60313 | Dynamalin-like 120 kDa protein, mitochondrial                            | 0.66 | 0.063 | 3.3E-02 | 3  | 4.2  |
| P46939 | Utrophin                                                                 | 0.65 | 0.352 | 2.5E-01 | 3  | 1.0  |
| Q9NTJ5 | Phosphatidylinositol phosphatase SAC1                                    | 0.65 | 0.079 | 2.5E-02 | 4  | 6.3  |
| Q03252 | Lamin-B2                                                                 | 0.65 | 0.040 | 4.7E-09 | 18 | 28.0 |
| P08603 | Complement factor H                                                      | 0.65 | NA    | NA      | 2  | 1.5  |
| P01834 | Ig kappa chain C region                                                  | 0.64 | 0.061 | 2.0E-02 | 3  | 48.1 |
| Q16851 | UTP--glucose-1-phosphate uridylyltransferase                             | 0.64 | NA    | NA      | 2  | 3.5  |
| Q8NFV8 | N-acylneuraminase cytidylyltransferase                                   | 0.63 | NA    | NA      | 2  | 5.1  |
| P00390 | Glutathione reductase, mitochondrial                                     | 0.63 | NA    | NA      | 2  | 6.3  |
| Q9HAM9 | EH domain-containing protein 1                                           | 0.63 | NA    | NA      | 2  | 5.1  |
| Q02224 | Centromere-associated protein E                                          | 0.62 | NA    | NA      | 2  | 0.4  |
| P06899 | Histone H2B type 1-J                                                     | 0.62 | NA    | NA      | 2  | 7.9  |
| Q9BRX8 | Redox-regulatory protein FAM213A                                         | 0.61 | NA    | NA      | 2  | 8.7  |
| P14625 | Endoplasmic                                                              | 0.61 | 0.044 | 2.4E-11 | 16 | 20.0 |
| P31942 | Heterogeneous nuclear ribonucleoprotein H3                               | 0.61 | 0.629 | 5.5E-01 | 3  | 12.1 |
| Q9BSJ8 | Extended synaptotagmin-1                                                 | 0.61 | 0.122 | 5.0E-02 | 4  | 4.8  |
| O00571 | ATP-dependent RNA helicase DDX3X                                         | 0.61 | NA    | NA      | 2  | 3.9  |
| P04844 | Dolichyl-diphosphooligosaccharide--protein glycosyltransferase subunit 2 | 0.60 | 0.129 | 5.4E-02 | 3  | 5.4  |
| P26583 | High mobility group protein B2                                           | 0.59 | NA    | NA      | 2  | 13.9 |
| P13861 | cAMP-dependent protein kinase type II-alpha regulatory subunit           | 0.59 | 0.052 | 2.2E-02 | 3  | 10.1 |
| P61163 | Alpha-centractin                                                         | 0.58 | NA    | NA      | 2  | 4.5  |
| P49257 | Protein ERGIC-53                                                         | 0.58 | NA    | NA      | 2  | 3.7  |
| P09543 | 2',3'-cyclic-nucleotide 3'-phosphodiesterase                             | 0.58 | 0.126 | 2.7E-02 | 7  | 14.0 |
| Q9NZ01 | Very-long-chain enoyl-CoA reductase                                      | 0.57 | 0.116 | 4.5E-01 | 3  | 10.4 |
| P67870 | Casein kinase II subunit beta                                            | 0.57 | 0.128 | 1.6E-02 | 3  | 12.6 |
| Q96S52 | GPI transamidase component PIG-S                                         | 0.57 | NA    | NA      | 2  | 5.9  |
| Q05682 | Caldesmon                                                                | 0.56 | 0.294 | 6.4E-02 | 4  | 6.3  |
| Q53GQ0 | Estradiol 17-beta-dehydrogenase 12                                       | 0.56 | NA    | NA      | 2  | 8.7  |
| Q6NUK1 | Calcium-binding mitochondrial carrier protein SCaMC-1                    | 0.56 | NA    | NA      | 2  | 4.4  |
| Q14950 | Myosin regulatory light chain 12B                                        | 0.56 | NA    | NA      | 2  | 12.2 |
| Q15149 | Plectin                                                                  | 0.55 | 0.028 | 0.0E+00 | 53 | 12.7 |
| Q9BZQ8 | Protein Niban                                                            | 0.55 | NA    | NA      | 2  | 1.9  |
| P67936 | Tropomyosin alpha-4 chain                                                | 0.55 | 0.170 | 7.2E-03 | 6  | 22.2 |
| P04217 | Alpha-1B-glycoprotein                                                    | 0.55 | 0.201 | 5.2E-02 | 3  | 6.7  |
| P04792 | Heat shock protein beta-1                                                | 0.55 | 0.058 | 5.3E-05 | 7  | 36.1 |
| P05023 | Sodium/potassium-transporting ATPase subunit alpha-1                     | 0.55 | 0.056 | 3.6E-06 | 20 | 22.5 |
| P60709 | Actin, cytoplasmic 1                                                     | 0.55 | 0.047 | 1.1E-07 | 6  | 22.9 |
| P60033 | CD81 antigen                                                             | 0.55 | NA    | NA      | 2  | 11.9 |
| O95782 | AP-2 complex subunit alpha-1                                             | 0.55 | 0.213 | 6.0E-02 | 4  | 3.8  |
| O75746 | Calcium-binding mitochondrial carrier protein Aralar1                    | 0.55 | NA    | NA      | 2  | 4.6  |
| Q14108 | Lysosome membrane protein 2                                              | 0.54 | NA    | NA      | 2  | 3.8  |
| P40763 | Signal transducer and activator of transcription 3                       | 0.54 | 0.246 | 1.3E-01 | 3  | 4.4  |
| P21589 | 5'-nucleotidase                                                          | 0.54 | 0.145 | 9.0E-02 | 3  | 5.6  |
| P13671 | Complement component C6                                                  | 0.54 | 0.207 | 1.4E-01 | 3  | 3.7  |
| P07358 | Complement component C8 beta chain                                       | 0.53 | NA    | NA      | 2  | 3.4  |
| O75131 | Copine-3                                                                 | 0.53 | 0.084 | 1.4E-03 | 4  | 6.7  |
| Q16181 | Septin-7                                                                 | 0.53 | 0.073 | 1.8E-05 | 8  | 17.8 |
| Q15836 | Vesicle-associated membrane protein 3                                    | 0.52 | NA    | NA      | 2  | 24.0 |
| Q43865 | Putative adenosylhomocysteinase 2                                        | 0.52 | NA    | NA      | 2  | 3.8  |
| P68371 | Tubulin beta-4B chain                                                    | 0.51 | 0.061 | 1.3E-06 | 4  | 13.3 |
| Q9UEY8 | Gamma-adducin                                                            | 0.50 | NA    | NA      | 2  | 3.8  |
| Q15019 | Septin-2                                                                 | 0.50 | 0.145 | 1.3E-02 | 6  | 22.7 |
| P68363 | Tubulin alpha-1B chain                                                   | 0.50 | NA    | NA      | 2  | 6.7  |
| P04196 | Histidine-rich glycoprotein                                              | 0.50 | 0.267 | 2.3E-02 | 4  | 8.4  |
| Q9NQC3 | Reticulon-4                                                              | 0.49 | 0.049 | 7.4E-07 | 3  | 2.7  |
| Q8WUM4 | Programmed cell death 6-interacting protein                              | 0.49 | 0.071 | 1.9E-04 | 6  | 7.9  |
| P07437 | Tubulin beta chain                                                       | 0.49 | 0.043 | 5.8E-12 | 3  | 9.9  |
| P11498 | Pyruvate carboxylase, mitochondrial                                      | 0.49 | NA    | NA      | 2  | 2.5  |
| Q8NEV1 | Casein kinase II subunit alpha 3                                         | 0.49 | NA    | NA      | 2  | 5.4  |
| P05362 | Intercellular adhesion molecule 1                                        | 0.49 | 0.219 | 7.2E-02 | 3  | 5.3  |
| P0CG05 | Ig lambda-2 chain C regions                                              | 0.49 | 0.085 | 4.5E-03 | 3  | 46.2 |
| P10142 | Kininogen-1                                                              | 0.48 | NA    | NA      | 2  | 3.0  |
| Q9NVA2 | Septin-11                                                                | 0.48 | 0.071 | 1.8E-04 | 3  | 7.0  |
| P20073 | Annexin A7                                                               | 0.47 | NA    | NA      | 2  | 5.1  |
| P04899 | Guanine nucleotide-binding protein G(i) subunit alpha-2                  | 0.47 | 0.094 | 1.6E-02 | 3  | 7.6  |
| P05091 | Aldehyde dehydrogenase, mitochondrial                                    | 0.47 | NA    | NA      | 2  | 4.3  |
| P08133 | Annexin A6                                                               | 0.47 | 0.050 | 1.4E-13 | 29 | 47.3 |
| Q00610 | Clathrin heavy chain 1                                                   | 0.47 | 0.040 | 1.1E-13 | 24 | 16.4 |
| P01024 | Complement C3                                                            | 0.46 | 0.152 | 3.0E-04 | 14 | 8.4  |
| P00387 | NADH-cytochrome b5 reductase 3                                           | 0.46 | 0.082 | 3.2E-05 | 7  | 27.2 |
| Q9HDC9 | Adipocyte plasma membrane-associated protein                             | 0.46 | NA    | NA      | 2  | 7.5  |
| P04040 | Catalase                                                                 | 0.46 | NA    | NA      | 2  | 4.7  |
| O94919 | Endonuclease domain-containing 1 protein                                 | 0.45 | NA    | NA      | 2  | 4.8  |
| P00352 | Retinal dehydrogenase 1                                                  | 0.45 | 0.023 | 6.9E-03 | 5  | 10.2 |
| P05556 | Integrin beta-1                                                          | 0.45 | 0.092 | 6.5E-06 | 6  | 8.8  |
| Q14764 | Major vault protein                                                      | 0.45 | 0.113 | 8.5E-03 | 3  | 3.8  |
| Q9UHG3 | Prenylcysteine oxidase 1                                                 | 0.45 | 0.167 | 4.3E-02 | 4  | 7.9  |
| P60660 | Myosin light polypeptide 6                                               | 0.45 | 0.043 | 7.8E-15 | 8  | 58.3 |
| P17612 | cAMP-dependent protein kinase catalytic subunit alpha                    | 0.44 | NA    | NA      | 2  | 4.3  |
| O95865 | N(G),N(G)-dimethylarginine dimethylaminohydrolase 2                      | 0.44 | NA    | NA      | 2  | 8.4  |
| Q9Y490 | Talin-1                                                                  | 0.44 | 0.037 | 0.0E+00 | 26 | 13.9 |
| P04114 | Apolipoprotein B-100                                                     | 0.43 | NA    | NA      | 2  | 0.3  |
| P43121 | Cell surface glycoprotein MUC18                                          | 0.43 | 0.146 | 7.4E-02 | 3  | 5.1  |
| Q9Y4G6 | Talin-2                                                                  | 0.43 | NA    | NA      | 2  | 1.3  |
| Q07954 | Prolow-density lipoprotein receptor-related protein 1                    | 0.42 | 0.101 | 1.2E-02 | 4  | 1.3  |
| Q14344 | Guanine nucleotide-binding protein subunit alpha-13                      | 0.42 | 0.302 | 5.0E-02 | 5  | 14.3 |
| P23634 | Plasma membrane calcium-transporting ATPase 4                            | 0.42 | 0.139 | 6.1E-03 | 3  | 3.9  |
| Q01995 | Transgelin                                                               | 0.42 | 0.113 | 4.7E-03 | 5  | 24.9 |
| P12814 | Alpha-actinin-1                                                          | 0.41 | 0.077 | 2.2E-04 | 11 | 15.9 |
| Q14847 | LIM and SH3 domain protein 1                                             | 0.40 | 3.677 | 7.9E-01 | 3  | 8.8  |
| P02452 | Collagen alpha-1(I) chain                                                | 0.39 | 0.346 | 3.4E-01 | 3  | 2.6  |
| Q9NYL9 | Tropomodulin-3                                                           | 0.39 | NA    | NA      | 2  | 7.4  |
| P62873 | Guanine nucleotide-binding protein G(i)/G(s)/G(t) subunit beta-1         | 0.38 | NA    | NA      | 2  | 9.4  |
| Q13642 | Four and a half LIM domains protein 1                                    | 0.36 | NA    | NA      | 2  | 8.0  |
| P08571 | Monocyte differentiation antigen CD14                                    | 0.36 | NA    | NA      | 2  | 5.3  |
| P11413 | Glucose-6-phosphate 1-dehydrogenase                                      | 0.35 | NA    | NA      | 2  | 3.9  |
| A8MTJ3 | Guanine nucleotide-binding protein G(t) subunit alpha-3                  | 0.31 | NA    | NA      | 2  | 5.4  |
| Q6DD88 | Atlastin-3                                                               | 0.29 | 0.194 | 1.9E-01 | 3  | 5.7  |
| P14136 | Glial fibrillary acidic protein                                          | 0.29 | NA    | NA      | 2  | 4.6  |
| Q9BS40 | Latexin                                                                  | 0.29 | NA    | NA      | 2  | 12.2 |
| P05026 | Sodium/potassium-transporting ATPase subunit beta-1                      | 0.29 | 0.453 | 1.2E-01 | 3  | 12.2 |
| P63010 | AP-2 complex subunit beta                                                | 0.29 | NA    | NA      | 2  | 2.3  |
| Q13425 | Beta-2-syntrophin                                                        | 0.28 | NA    | NA      | 2  | 2.6  |
| P09936 | Ubiquitin carboxyl-terminal hydrolase isozyme L1                         | 0.24 | 0.662 | 2.0E-01 | 3  | 13.9 |
| Q03135 | Caveolin-1                                                               | 0.24 | NA    | NA      | 2  | 13.5 |
| Q14699 | Raftin                                                                   | 0.23 | NA    | NA      | 2  | 2.1  |
| P05787 | Keratin, type II cytoskeletal 8                                          | 0.23 | NA    | NA      | 2  | 3.3  |
| P60201 | Myelin proteolipid protein                                               | 0.23 | NA    | NA      | 2  | 7.6  |
| P61626 | Lysozyme C                                                               | 0.23 | NA    | NA      | 2  | 12.8 |
| P29992 | Guanine nucleotide-binding protein subunit alpha-11                      | 0.22 | NA    | NA      | 2  | 6.1  |
| P17661 | Desmin                                                                   | 0.22 | NA    | NA      | 2  | 3.4  |

Table S5-Sample UM30

|        |                                                                      |      |       |         |    |      |
|--------|----------------------------------------------------------------------|------|-------|---------|----|------|
| P16157 | Ankyrin-1                                                            | 0.17 | NA    | NA      | 2  | 1.5  |
| P05186 | Alkaline phosphatase, tissue-nonspecific isozyme                     | 0.17 | NA    | NA      | 2  | 3.4  |
| Q02462 | Collagen alpha-1(V) chain                                            | 0.17 | NA    | NA      | 2  | 1.4  |
| Q9UBX5 | Fibulin-5                                                            | 0.17 | NA    | NA      | 2  | 3.6  |
| P02654 | Apolipoprotein C-I                                                   | 0.16 | NA    | NA      | 2  | 24.1 |
| P11277 | Spectrin beta chain, erythrocytic                                    | 0.15 | 0.327 | 1.2E-01 | 5  | 3.4  |
| Q14624 | Inter-alpha-trypsin inhibitor heavy chain H4                         | 0.15 | NA    | NA      | 2  | 1.9  |
| O00468 | Agtrin                                                               | 0.15 | NA    | NA      | 2  | 1.2  |
| P24844 | Myosin regulatory light polypeptide 9                                | 0.14 | NA    | NA      | 2  | 12.2 |
| P58166 | Inhibin beta E chain                                                 | 0.14 | 0.304 | 1.2E-01 | 3  | 10.0 |
| P05164 | Myeloperoxidase                                                      | 0.12 | NA    | NA      | 2  | 3.0  |
| P43320 | Beta-crystallin B2                                                   | 0.12 | NA    | NA      | 2  | 11.7 |
| P23946 | Chymase                                                              | 0.10 | 0.326 | 6.6E-02 | 3  | 15.0 |
| Q9BXN1 | Asporin                                                              | 0.09 | NA    | NA      | 2  | 5.5  |
| P32119 | Peroxiredoxin-2                                                      | 0.40 | 0.084 | 1.1E-05 | 4  | 18.2 |
| Q969G5 | Protein kinase C delta-binding protein                               | 0.38 | 0.144 | 3.1E-02 | 3  | 11.5 |
| O00159 | Unconventional myosin-1c                                             | 0.37 | 0.075 | 1.1E-05 | 10 | 9.4  |
| P18206 | Vinculin                                                             | 0.37 | 0.094 | 6.5E-07 | 12 | 14.0 |
| O94905 | Erlin-2                                                              | 0.36 | 0.118 | 4.1E-03 | 6  | 15.6 |
| P00738 | Haptoglobin                                                          | 0.36 | 0.093 | 4.5E-05 | 5  | 13.1 |
| Q6NZI2 | Polymerase I and transcript release factor                           | 0.36 | 0.108 | 5.8E-05 | 7  | 18.7 |
| O43301 | Heat shock 70 kDa protein 12A                                        | 0.34 | 0.183 | 1.2E-02 | 4  | 7.7  |
| P02511 | Alpha-crystallin B chain                                             | 0.33 | 0.161 | 5.5E-03 | 6  | 35.4 |
| P00450 | Ceruloplasmin                                                        | 0.33 | 0.110 | 1.7E-07 | 10 | 11.4 |
| Q15582 | Transforming growth factor-beta-induced protein ig-h3                | 0.33 | 0.097 | 8.0E-03 | 3  | 5.1  |
| P02749 | Beta-2-glycoprotein 1                                                | 0.32 | 0.094 | 7.2E-03 | 4  | 12.5 |
| Q9BUF5 | Tubulin beta-6 chain                                                 | 0.32 | 0.160 | 1.5E-04 | 3  | 7.0  |
| Q13813 | Spectrin alpha chain, non-erythrocytic 1                             | 0.32 | 0.030 | 0.0E+00 | 72 | 31.5 |
| P0COL5 | Complement C4-B                                                      | 0.32 | 0.159 | 2.4E-04 | 7  | 3.2  |
| P35579 | Myosin-9                                                             | 0.32 | 0.033 | 0.0E+00 | 54 | 26.6 |
| Q9Y6N5 | Sulfide:quinone oxidoreductase, mitochondrial                        | 0.32 | 0.028 | 1.1E-04 | 3  | 7.3  |
| Q01082 | Spectrin beta chain, non-erythrocytic 1                              | 0.32 | 0.043 | 0.0E+00 | 50 | 24.6 |
| P09493 | Tropomyosin alpha-1 chain                                            | 0.31 | 0.086 | 2.6E-07 | 6  | 15.1 |
| P46821 | Microtubule-associated protein 1B                                    | 0.30 | 0.213 | 3.2E-02 | 4  | 2.0  |
| P12111 | Collagen alpha-3(VI) chain                                           | 0.29 | 0.054 | 0.0E+00 | 37 | 12.2 |
| P07355 | Annexin A2                                                           | 0.29 | 0.033 | 0.0E+00 | 25 | 56.9 |
| P00747 | Plasminogen                                                          | 0.29 | 0.099 | 2.5E-05 | 6  | 9.1  |
| P12110 | Collagen alpha-2(VI) chain                                           | 0.29 | 0.065 | 5.2E-10 | 7  | 7.7  |
| P07197 | Neurofilament medium polypeptide                                     | 0.28 | 0.246 | 1.4E-02 | 6  | 5.2  |
| Q9NZM1 | Myoferlin                                                            | 0.28 | 0.227 | 3.2E-03 | 8  | 4.3  |
| P80723 | Brain acid soluble protein 1                                         | 0.27 | 0.222 | 2.7E-02 | 5  | 33.0 |
| P50895 | Basal cell adhesion molecule                                         | 0.27 | 0.215 | 3.8E-03 | 3  | 6.7  |
| Q02952 | A-kinase anchor protein 12                                           | 0.26 | 0.138 | 6.0E-05 | 17 | 13.4 |
| P55268 | Laminin subunit beta-2                                               | 0.26 | 0.127 | 7.0E-07 | 13 | 8.2  |
| P08294 | Extracellular superoxide dismutase [Cu-Zn]                           | 0.26 | 0.102 | 1.5E-03 | 3  | 15.4 |
| P00167 | Cytochrome b5                                                        | 0.26 | 0.096 | 7.4E-03 | 3  | 35.8 |
| P12109 | Collagen alpha-1(VI) chain                                           | 0.25 | 0.068 | 1.1E-07 | 10 | 10.4 |
| O75369 | Filamin-B                                                            | 0.24 | 0.107 | 1.5E-04 | 6  | 2.9  |
| P69093 | Protein S100-A10                                                     | 0.24 | 0.187 | 1.7E-03 | 3  | 35.1 |
| O43491 | Band 4.1-like protein 2                                              | 0.24 | 0.073 | 7.7E-03 | 10 | 14.4 |
| P27105 | Erythrocyte band 7 integral membrane protein                         | 0.24 | 0.146 | 2.1E-05 | 6  | 20.1 |
| O94875 | Sorbin and SH3 domain-containing protein 2                           | 0.24 | 0.183 | 2.7E-03 | 3  | 3.3  |
| P02751 | Fibronectin                                                          | 0.24 | 0.096 | 1.2E-07 | 12 | 7.2  |
| P07099 | Epoxide hydrolase 1                                                  | 0.23 | 0.066 | 2.8E-08 | 6  | 13.0 |
| P06396 | Gelsolin                                                             | 0.23 | 0.125 | 4.2E-07 | 9  | 11.5 |
| P68032 | Actin, alpha cardiac muscle 1                                        | 0.23 | 0.127 | 2.0E-08 | 6  | 21.0 |
| O15230 | Laminin subunit alpha-5                                              | 0.23 | 0.121 | 1.2E-05 | 14 | 4.6  |
| P01011 | Alpha-1-antichymotrypsin                                             | 0.22 | 0.132 | 7.9E-06 | 6  | 12.8 |
| P21333 | Filamin-A                                                            | 0.22 | 0.045 | 0.0E+00 | 51 | 26.0 |
| Q9Y6C2 | EMILIN-1                                                             | 0.22 | 0.289 | 5.4E-03 | 5  | 6.5  |
| P02549 | Spectrin alpha chain, erythrocytic 1                                 | 0.22 | 0.319 | 1.7E-03 | 6  | 3.8  |
| P39060 | Collagen alpha-1(XVIII) chain                                        | 0.22 | 0.118 | 2.8E-08 | 9  | 5.0  |
| P08572 | Collagen alpha-2(IV) chain                                           | 0.21 | 0.125 | 1.5E-07 | 6  | 4.6  |
| P02686 | Myelin basic protein                                                 | 0.21 | 0.088 | 4.4E-06 | 3  | 11.2 |
| Q14112 | Nidogen-2                                                            | 0.20 | 0.132 | 9.9E-07 | 8  | 6.7  |
| P98160 | Basement membrane-specific heparan sulfate proteoglycan core protein | 0.19 | 0.074 | 0.0E+00 | 24 | 6.7  |
| Q9BXM0 | Periaxin                                                             | 0.19 | 0.240 | 2.0E-04 | 6  | 1.6  |
| P22105 | Tenascin-X                                                           | 0.19 | 0.190 | 2.5E-02 | 4  | 1.0  |
| P07942 | Laminin subunit beta-1                                               | 0.19 | 0.109 | 5.2E-04 | 3  | 1.6  |
| P14555 | Phospholipase A2, membrane associated                                | 0.19 | 0.238 | 1.5E-02 | 4  | 23.6 |
| P02679 | Fibrinogen gamma chain                                               | 0.19 | 0.135 | 3.2E-08 | 10 | 22.5 |
| P11166 | Solute carrier family 2, facilitated glucose transporter member 1    | 0.19 | 0.190 | 1.1E-03 | 3  | 5.5  |
| Q16555 | Dihydropyrimidinase-related protein 2                                | 0.18 | 0.125 | 3.4E-09 | 10 | 22.0 |
| P11047 | Laminin subunit gamma-1                                              | 0.18 | 0.131 | 5.4E-06 | 9  | 5.2  |
| Q05707 | Collagen alpha-1(XIV) chain                                          | 0.18 | 0.319 | 6.2E-04 | 8  | 4.7  |
| Q16363 | Laminin subunit alpha-4                                              | 0.18 | 0.160 | 1.5E-02 | 4  | 1.9  |
| Q12805 | EGF-containing fibulin-like extracellular matrix protein 1           | 0.17 | 0.065 | 1.7E-03 | 3  | 5.7  |
| P02649 | Apolipoprotein E                                                     | 0.17 | 0.111 | 9.1E-05 | 13 | 44.5 |
| P14543 | Nidogen-1                                                            | 0.16 | 0.132 | 1.5E-08 | 9  | 8.5  |
| P36269 | Gamma-glutamyltransferase 5                                          | 0.16 | 0.185 | 2.4E-04 | 4  | 7.3  |
| P35749 | Myosin-11                                                            | 0.15 | 0.076 | 1.3E-15 | 32 | 17.8 |
| P01871 | Ig mu chain C region                                                 | 0.15 | 0.122 | 6.2E-05 | 7  | 18.8 |
| P02675 | Fibrinogen beta chain                                                | 0.15 | 0.090 | 6.9E-14 | 11 | 29.7 |
| P39059 | Collagen alpha-1(XV) chain                                           | 0.14 | 0.105 | 5.0E-08 | 5  | 3.5  |
| P41219 | Peripherin                                                           | 0.13 | 0.144 | 6.8E-08 | 12 | 24.9 |
| P04083 | Annexin A1                                                           | 0.13 | 0.074 | 4.4E-16 | 11 | 29.8 |
| P10745 | Retinol-binding protein 3                                            | 0.13 | 0.197 | 3.8E-03 | 4  | 3.0  |
| P02760 | Protein AMBP                                                         | 0.12 | 0.151 | 9.7E-06 | 4  | 19.0 |
| P15088 | Mast cell carboxypeptidase A                                         | 0.11 | 0.384 | 3.6E-03 | 5  | 12.0 |
| Q15661 | Tryptase alpha/beta-1                                                | 0.11 | 0.165 | 6.9E-09 | 6  | 21.8 |
| P04275 | von Willebrand factor                                                | 0.11 | 0.127 | 1.4E-09 | 14 | 5.3  |
| P01008 | Antithrombin-III                                                     | 0.11 | 0.226 | 2.1E-04 | 6  | 12.9 |
| P51888 | Prolargin                                                            | 0.11 | 0.095 | 0.0E+00 | 12 | 34.3 |
| P21926 | CD9 antigen                                                          | 0.10 | 0.131 | 6.2E-04 | 3  | 9.6  |
| P22352 | Glutathione peroxidase 3                                             | 0.10 | 0.130 | 2.0E-03 | 3  | 11.5 |
| P07585 | Decorin                                                              | 0.10 | 0.142 | 1.6E-04 | 7  | 18.7 |
| P21980 | Protein-glutamine gamma-glutamyltransferase 2                        | 0.10 | 0.134 | 1.9E-10 | 16 | 21.3 |
| P26447 | Protein S100-A4                                                      | 0.10 | 0.120 | 7.3E-06 | 3  | 27.7 |
| P02671 | Fibrinogen alpha chain                                               | 0.10 | 0.140 | 7.5E-09 | 9  | 12.4 |
| P08123 | Collagen alpha-2(I) chain                                            | 0.10 | 0.081 | 1.2E-07 | 3  | 3.7  |
| P35625 | Metalloproteinase inhibitor 3                                        | 0.09 | 0.168 | 4.1E-08 | 5  | 24.6 |
| Q14195 | Dihydropyrimidinase-related protein 3                                | 0.09 | 0.148 | 3.4E-07 | 8  | 18.1 |
| P20774 | Mimcan                                                               | 0.09 | 0.116 | 1.4E-11 | 8  | 24.8 |
| P02730 | Band 3 anion transport protein                                       | 0.09 | 0.180 | 7.5E-06 | 8  | 11.3 |
| P10909 | Clusterin                                                            | 0.09 | 0.088 | 0.0E+00 | 13 | 26.9 |
| P35555 | Fibrillin-1                                                          | 0.09 | 0.057 | 0.0E+00 | 45 | 16.7 |
| P51884 | Lumican                                                              | 0.08 | 0.071 | 0.0E+00 | 9  | 26.0 |
| P02748 | Complement component C9                                              | 0.08 | 0.161 | 1.4E-06 | 8  | 13.2 |
| P21810 | Biglycan                                                             | 0.07 | 0.113 | 4.4E-16 | 11 | 31.5 |
| P01031 | Complement C5                                                        | 0.07 | 0.242 | 8.9E-05 | 5  | 3.0  |
| P04004 | Vitronectin                                                          | 0.06 | 0.101 | 0.0E+00 | 10 | 15.9 |
| P02743 | Serum amyloid P-component                                            | 0.06 | 0.158 | 5.1E-08 | 7  | 27.8 |
| P25189 | Myelin protein P0                                                    | 0.05 | 0.085 | 1.6E-09 | 7  | 27.4 |
| P22748 | Carbonic anhydrase 4                                                 | 0.05 | 0.203 | 1.7E-07 | 7  | 22.8 |

Brown denotes change  $\geq 2$  standard deviations (SD) from the mean, yellow denotes change  $\geq 1$  SD and green highlights p values  $\leq 0.05$ . NA, not applicable. n<3 unique peptides.
