# Supplementary material for: iTRAQ Quantitative Proteomic Comparison of Metastatic and Non-Metastatic Uveal Melanoma Tumors
Source: PubMed Central journal article supplement (PMC4549237; doi:10.1371/journal.pone.0135543), 2015-08-25
Supplement: pone.0135543.s006.pdf [file pone.0135543.s006.pdf]

## Supplementary Table S6

## Relative Protein Abundance: Sample UM13, Non-Metastatic

Total Proteins Quantified = 883; LogMedian Protein Ratio = 0.20; LogMean Protein Ratio = 0; Standard Deviation = 0.98

| Uni-Prot Accession | Protein                                                                    | Ratio UM/Control | Standard Deviation | p value | Unique Peptides | % Sequence Coverage |
|--------------------|----------------------------------------------------------------------------|------------------|--------------------|---------|-----------------|---------------------|
| P10599             | Thioredoxin                                                                | 10.93            | 0.100              | 2.2E-11 | 5               | 51.4                |
| P62937             | Peptidyl-prolyl cis-trans isomerase A                                      | 9.65             | 0.088              | 4.4E-16 | 11              | 70.9                |
| P30086             | Phosphatidylethanolamine-binding protein 1                                 | 9.47             | 0.114              | 2.8E-13 | 11              | 65.8                |
| P23297             | Protein S100-A1                                                            | 7.79             | 0.315              | 2.2E-05 | 3               | 41.5                |
| P00338             | L-lactate dehydrogenase A chain                                            | 7.39             | 0.116              | 2.9E-13 | 12              | 30.7                |
| P07108             | Acyl-CoA-binding protein                                                   | 6.09             | 0.179              | 1.4E-03 | 4               | 62.1                |
| P22087             | rRNA 2'-O-methyltransferase fibrillar                                      | 6.03             | 0.123              | 1.4E-04 | 5               | 19.0                |
| P60174             | Triosephosphate isomerase                                                  | 6.01             | 0.101              | 5.3E-06 | 15              | 59.1                |
| P61604             | 10 kDa heat shock protein, mitochondrial                                   | 5.77             | 0.105              | 4.2E-06 | 7               | 62.7                |
| P07900             | Heat shock protein HSP 90-alpha                                            | 5.76             | 0.068              | 0.0E+00 | 20              | 23.6                |
| P04406             | Glyceraldehyde-3-phosphate dehydrogenase                                   | 5.28             | 0.057              | 2.5E-12 | 16              | 47.2                |
| P08238             | Heat shock protein HSP 90-beta                                             | 5.09             | 0.094              | 5.3E-12 | 18              | 20.7                |
| P16402             | Histone H1.3                                                               | 5.06             | 0.084              | 6.3E-08 | 6               | 15.4                |
| P04080             | Cystatin-B                                                                 | 4.99             | 0.107              | 3.1E-08 | 4               | 55.1                |
| P17096             | High mobility group protein HMG-I/HMG-Y                                    | 4.92             | 0.245              | 1.7E-02 | 3               | 23.4                |
| Q8NCW5             | NAD(P)H-hydrate epimerase                                                  | 4.90             | 0.284              | 1.2E-02 | 3               | 10.8                |
| P16070             | CD44 antigen                                                               | 4.89             | 0.108              | 3.2E-09 | 10              | 13.2                |
| P00558             | Phosphoglycerate kinase 1                                                  | 4.77             | 0.089              | 5.1E-14 | 17              | 44.6                |
| Q04760             | Lactoylglutathione lyase                                                   | 4.59             | 0.134              | 5.9E-06 | 6               | 22.8                |
| P15531             | Nucleoside diphosphate kinase A                                            | 4.58             | 0.111              | 7.4E-08 | 7               | 44.1                |
| P07195             | L-lactate dehydrogenase B chain                                            | 4.52             | 0.109              | 5.3E-06 | 7               | 18.3                |
| P31948             | Stress-induced-phosphoprotein 1                                            | 4.45             | 0.071              | 1.5E-12 | 18              | 29.7                |
| P63241             | Eukaryotic translation initiation factor 5A-1                              | 4.29             | 0.135              | 4.4E-04 | 7               | 35.7                |
| PODME0             | Protein SETSIP                                                             | 4.26             | 0.172              | 4.8E-04 | 5               | 20.2                |
| P55769             | NHP2-like protein 1                                                        | 4.09             | 0.128              | 2.3E-04 | 3               | 24.2                |
| P99999             | Cytochrome c                                                               | 3.93             | 0.135              | 8.1E-08 | 6               | 60.0                |
| P20042             | Eukaryotic translation initiation factor 2 subunit 2                       | 3.82             | 0.197              | 1.4E-02 | 4               | 13.5                |
| P23528             | Cofilin-1                                                                  | 3.78             | 0.173              | 2.7E-04 | 10              | 44.6                |
| P22234             | Multifunctional protein ADE2                                               | 3.76             | 0.261              | 1.5E-02 | 3               | 6.4                 |
| P58546             | Myotrophin                                                                 | 3.65             | 0.074              | 4.5E-03 | 3               | 31.4                |
| P08758             | Annexin A5                                                                 | 3.63             | 0.046              | 0.0E+00 | 21              | 70.0                |
| P06733             | Alpha-enolase                                                              | 3.62             | 0.075              | 3.1E-12 | 16              | 48.8                |
| P78417             | Glutathione S-transferase omega-1                                          | 3.61             | 0.096              | 3.8E-06 | 9               | 36.1                |
| P23526             | Adenosylhomocysteinase                                                     | 3.58             | 0.158              | 6.7E-04 | 7               | 17.6                |
| P30044             | Peroxisome oxidoreductin-5, mitochondrial                                  | 3.48             | 0.114              | 2.9E-04 | 5               | 23.4                |
| P40926             | Malate dehydrogenase, mitochondrial                                        | 3.46             | 0.057              | 3.1E-06 | 16              | 58.6                |
| Q13185             | Chromobox protein homolog 3                                                | 3.41             | 0.185              | 1.3E-02 | 3               | 18.0                |
| P24941             | Cyclin-dependent kinase 2                                                  | 3.41             | 0.145              | 1.6E-04 | 7               | 27.9                |
| P62750             | 60S ribosomal protein L23a                                                 | 3.40             | 0.058              | 1.3E-05 | 5               | 27.6                |
| P63104             | 14-3-3 protein zeta/delta                                                  | 3.40             | 0.123              | 1.1E-03 | 8               | 42.4                |
| P11766             | Alcohol dehydrogenase class-3                                              | 3.38             | 0.229              | 3.8E-02 | 3               | 7.0                 |
| O75368             | SH3 domain-binding glutamic acid-rich-like protein                         | 3.32             | 0.198              | 6.3E-04 | 4               | 31.6                |
| P19338             | Nucleolin                                                                  | 3.28             | 0.065              | 2.0E-12 | 18              | 25.6                |
| P40925             | Malate dehydrogenase, cytoplasmic                                          | 3.21             | 0.156              | 9.9E-04 | 6               | 21.9                |
| P38646             | Stress-70 protein, mitochondrial                                           | 3.20             | 0.058              | 5.5E-11 | 24              | 39.5                |
| Q99497             | Protein DJ-1                                                               | 3.20             | 0.320              | 2.2E-02 | 5               | 24.3                |
| P12955             | Xaa-Pro dipeptidase                                                        | 3.19             | 0.192              | 1.6E-02 | 6               | 12.2                |
| O15400             | Syntaxin-7                                                                 | 3.16             | 0.131              | 7.7E-05 | 5               | 25.3                |
| P07737             | Profilin-1                                                                 | 3.16             | 0.160              | 2.7E-04 | 6               | 47.9                |
| P31937             | 3-hydroxyisobutyrate dehydrogenase, mitochondrial                          | 3.13             | 0.356              | 1.7E-02 | 5               | 18.2                |
| Q99798             | Aconitate hydratase, mitochondrial                                         | 3.08             | 0.095              | 7.0E-04 | 12              | 22.4                |
| P16949             | Stathmin                                                                   | 3.07             | 0.165              | 9.4E-04 | 3               | 24.2                |
| P51858             | Hepatoma-derived growth factor                                             | 3.00             | 0.179              | 1.4E-03 | 5               | 30.4                |
| P49189             | 4-trimethylaminobutyraldehyde dehydrogenase                                | 3.00             | 0.202              | 1.6E-03 | 4               | 8.1                 |
| P29401             | Transketolase                                                              | 2.96             | 0.113              | 2.8E-03 | 13              | 22.8                |
| P57729             | Ras-related protein Rab-38                                                 | 2.95             | 0.173              | 5.5E-04 | 4               | 22.3                |
| Q9Y2S2             | Lambda-crystallin homolog                                                  | 2.95             | 0.278              | 3.2E-02 | 6               | 19.7                |
| P30043             | Flavin reductase (NADPH)                                                   | 2.94             | 0.207              | 9.1E-03 | 3               | 18.9                |
| P13797             | Plastin-3                                                                  | 2.93             | 0.105              | 7.3E-06 | 10              | 17.6                |
| Q9BYT8             | Neurolysin, mitochondrial                                                  | 2.92             | 0.110              | 4.3E-03 | 4               | 7.8                 |
| P62826             | GTP-binding nuclear protein Ran                                            | 2.88             | 0.113              | 2.6E-02 | 5               | 24.5                |
| Q96199             | Succinyl-CoA ligase [GDP-forming] subunit beta, mitochondrial              | 2.82             | 0.070              | 2.1E-07 | 6               | 14.6                |
| P21266             | Glutathione S-transferase Mu 3                                             | 2.78             | 0.085              | 2.7E-07 | 6               | 29.3                |
| Q16836             | Hydroxyacyl-coenzyme A dehydrogenase, mitochondrial                        | 2.73             | 0.138              | 2.2E-03 | 4               | 18.2                |
| P30837             | Aldehyde dehydrogenase X, mitochondrial                                    | 2.72             | 0.131              | 9.6E-07 | 10              | 26.5                |
| P52565             | Rho GDP-dissociation inhibitor 1                                           | 2.70             | 0.227              | 4.3E-03 | 4               | 22.5                |
| P14174             | Macrophage migration inhibitory factor                                     | 18.58            | NA                 | NA      | 2               | 17.4                |
| P06454             | Prothymosin alpha                                                          | 13.55            | 0.313              | 1.9E-01 | 3               | 21.6                |
| P35270             | Sepiapterin reductase                                                      | 6.67             | NA                 | NA      | 2               | 10.0                |
| O75531             | Barrier-to-autointegration factor                                          | 5.07             | 0.616              | 2.6E-01 | 3               | 42.7                |
| O75347             | Tubulin-specific chaperone A                                               | 4.74             | 0.638              | 7.5E-02 | 3               | 26.9                |
| O60888             | Protein CutA                                                               | 3.96             | NA                 | NA      | 2               | 15.6                |
| Q15819             | Ubiquitin-conjugating enzyme E2 variant 2                                  | 3.60             | NA                 | NA      | 2               | 13.1                |
| P52815             | 39S ribosomal protein L12, mitochondrial                                   | 3.10             | NA                 | NA      | 2               | 11.6                |
| Q6P148             | Aspartate-tRNA ligase, mitochondrial                                       | 3.07             | 0.260              | 5.7E-02 | 4               | 6.5                 |
| P10768             | S-formylglutathione hydrolase                                              | 3.00             | NA                 | NA      | 2               | 7.8                 |
| P00915             | Carbonic anhydrase 1                                                       | 2.99             | NA                 | NA      | 2               | 8.0                 |
| P09429             | High mobility group protein B1                                             | 2.86             | 0.116              | 1.0E-01 | 6               | 27.0                |
| O43598             | 2'-deoxynucleoside 5'-phosphate N-hydrolase 1                              | 2.82             | NA                 | NA      | 2               | 18.4                |
| Q9UQ80             | Proliferation-associated protein 2G4                                       | 2.82             | NA                 | NA      | 2               | 6.3                 |
| P35613             | Basigin                                                                    | 2.82             | NA                 | NA      | 2               | 8.3                 |
| Q5JN25             | Putative 40S ribosomal protein S26-like 1                                  | 2.80             | NA                 | NA      | 2               | 20.9                |
| Q9Y285             | Phenylalanine-tRNA ligase alpha subunit                                    | 2.77             | NA                 | NA      | 2               | 8.7                 |
| Q9H0R4             | Haloacid dehalogenase-like hydrolase domain-containing protein 2           | 2.72             | NA                 | NA      | 2               | 8.1                 |
| P06748             | Nucleophosmin                                                              | 2.67             | 0.113              | 2.8E-05 | 7               | 27.9                |
| P50453             | Serpin B9                                                                  | 2.67             | 0.190              | 1.4E-02 | 7               | 22.9                |
| Q43399             | Tumor protein D54                                                          | 2.66             | 0.084              | 9.8E-04 | 5               | 39.3                |
| Q95834             | Echinoderm microtubule-associated protein-like 2                           | 2.66             | NA                 | NA      | 2               | 5.5                 |
| Q9BUP0             | EF-hand domain-containing protein D1                                       | 2.65             | 0.351              | 9.8E-02 | 3               | 10.9                |
| P60842             | Eukaryotic initiation factor 4A-I                                          | 2.64             | 0.258              | 7.2E-03 | 3               | 8.1                 |
| P06744             | Glucose-6-phosphate isomerase                                              | 2.63             | 0.119              | 2.4E-05 | 13              | 29.4                |
| P15121             | Aldose reductase                                                           | 2.59             | 0.151              | 3.1E-02 | 3               | 11.4                |
| P12830             | Cadherin-1                                                                 | 2.58             | NA                 | NA      | 2               | 2.4                 |
| Q99729             | Heterogeneous nuclear ribonucleoprotein A/B                                | 2.52             | 0.149              | 9.7E-04 | 3               | 6.9                 |
| P00441             | Superoxide dismutase [Cu-Zn]                                               | 2.51             | 0.358              | 4.1E-02 | 3               | 22.1                |
| Q07955             | Serine/arginine-rich splicing factor 1                                     | 2.49             | 0.273              | 5.7E-02 | 3               | 8.5                 |
| Q92597             | Protein NDRG1                                                              | 2.48             | 0.200              | 4.9E-03 | 8               | 30.5                |
| P62861             | 40S ribosomal protein S30                                                  | 2.48             | NA                 | NA      | 2               | 18.6                |
| Q9Y2X3             | Nucleolar protein 58                                                       | 2.46             | 0.339              | 9.5E-02 | 6               | 16.1                |
| P30084             | Enoyl-CoA hydratase, mitochondrial                                         | 2.43             | 0.765              | 1.8E-01 | 5               | 22.1                |
| Q9NSE4             | Isoleucine-tRNA ligase, mitochondrial                                      | 2.43             | 0.085              | 2.8E-05 | 9               | 12.0                |
| Q00796             | Sorbitol dehydrogenase                                                     | 2.43             | 0.129              | 3.7E-02 | 3               | 4.8                 |
| P07954             | Fumarate hydratase, mitochondrial                                          | 2.43             | NA                 | NA      | 2               | 4.3                 |
| P61088             | Ubiquitin-conjugating enzyme E2 N                                          | 2.42             | 0.395              | 2.0E-01 | 4               | 28.3                |
| P16219             | Short-chain specific acyl-CoA dehydrogenase, mitochondrial                 | 2.42             | 0.102              | 6.5E-03 | 3               | 9.7                 |
| Q92820             | Gamma-glutamyl hydrolase                                                   | 2.41             | 0.269              | 5.0E-02 | 3               | 9.1                 |
| Q04837             | Single-stranded DNA-binding protein, mitochondrial                         | 2.41             | 0.292              | 2.1E-01 | 3               | 23.6                |
| E9PAV3             | Nascent polypeptide-associated complex subunit alpha, muscle-specific form | 2.41             | 0.219              | 4.4E-02 | 3               | 2.0                 |

Table S6-Sample UM13

|        |                                                                      |      |       |         |    |      |
|--------|----------------------------------------------------------------------|------|-------|---------|----|------|
| P62258 | 14-3-3 protein epsilon                                               | 2.40 | 0.143 | 4.8E-04 | 10 | 36.9 |
| O00567 | Nucleolar protein 56                                                 | 2.39 | 0.665 | 1.8E-01 | 4  | 9.3  |
| P30042 | ES1 protein homolog, mitochondrial                                   | 2.38 | 0.133 | 3.3E-02 | 4  | 18.7 |
| P50395 | Rab GDP dissociation inhibitor beta                                  | 2.37 | 0.276 | 3.7E-02 | 8  | 24.0 |
| O14556 | Glyceraldehyde-3-phosphate dehydrogenase, testis-specific            | 2.37 | 0.163 | 9.3E-03 | 4  | 12.5 |
| P49773 | Histidine triad nucleotide-binding protein 1                         | 2.37 | 0.536 | 7.7E-02 | 4  | 53.2 |
| P05413 | Fatty acid-binding protein, heart                                    | 2.37 | NA    | NA      | 2  | 15.8 |
| Q9UL12 | Sarcosine dehydrogenase, mitochondrial                               | 2.37 | NA    | NA      | 2  | 2.6  |
| Q15293 | Reticulocalbin-1                                                     | 2.36 | 0.095 | 5.5E-03 | 7  | 19.0 |
| Q00059 | Transcription factor A, mitochondrial                                | 2.35 | 0.112 | 5.9E-04 | 7  | 25.2 |
| P0CW22 | 40S ribosomal protein S17-like                                       | 2.35 | 0.225 | 6.0E-02 | 3  | 16.3 |
| P16401 | Histone H1.5                                                         | 2.35 | 0.125 | 1.1E-03 | 4  | 15.0 |
| P63244 | Guanine nucleotide-binding protein subunit beta-2-like 1             | 2.34 | 0.183 | 6.9E-03 | 6  | 20.5 |
| P30405 | Peptidyl-prolyl cis-trans isomerase F, mitochondrial                 | 2.34 | NA    | NA      | 2  | 8.7  |
| P53985 | Monocarboxylate transporter 1                                        | 2.34 | 0.260 | 1.2E-01 | 3  | 6.6  |
| Q13838 | Spliceosome RNA helicase DDX39B                                      | 2.33 | 0.147 | 1.3E-03 | 8  | 21.3 |
| Q8NC51 | Plasminogen activator inhibitor 1 RNA-binding protein                | 2.33 | 0.597 | 3.7E-01 | 4  | 12.3 |
| P10809 | 60 kDa heat shock protein, mitochondrial                             | 2.32 | 0.081 | 2.6E-04 | 20 | 40.0 |
| Q8NFV4 | Alpha/beta hydrolase domain-containing protein 11                    | 2.32 | NA    | NA      | 2  | 8.6  |
| P09211 | Glutathione S-transferase P                                          | 2.31 | 0.184 | 9.4E-02 | 8  | 57.1 |
| P21291 | Cysteine and glycine-rich protein 1                                  | 2.30 | 0.159 | 2.5E-03 | 3  | 21.8 |
| P30040 | Endoplasmic reticulum resident protein 29                            | 2.30 | NA    | NA      | 2  | 8.4  |
| P27348 | 14-3-3 protein theta                                                 | 2.28 | NA    | NA      | 2  | 13.5 |
| P30041 | Peroxisomal protein 6                                                | 2.27 | 0.065 | 1.1E-06 | 9  | 37.9 |
| Q9Y4W6 | AFG3-like protein 2                                                  | 2.26 | 0.103 | 2.7E-03 | 9  | 12.2 |
| P30049 | ATP synthase subunit delta, mitochondrial                            | 2.26 | NA    | NA      | 2  | 13.7 |
| P04792 | Heat shock protein beta-1                                            | 2.25 | 0.089 | 5.5E-06 | 8  | 55.1 |
| Q13177 | Serine/threonine-protein kinase PAK 2                                | 2.25 | NA    | NA      | 2  | 5.9  |
| P13693 | Translationally-controlled tumor protein                             | 2.20 | NA    | NA      | 2  | 15.7 |
| P27695 | DNA-(apurinic or apyrimidinic site) lyase                            | 2.19 | NA    | NA      | 2  | 7.2  |
| Q99536 | Synaptic vesicle membrane protein VAT-1 homolog                      | 2.19 | 0.049 | 5.9E-07 | 13 | 47.8 |
| P07910 | Heterogeneous nuclear ribonucleoproteins C1/C2                       | 2.18 | 0.135 | 1.4E-04 | 8  | 26.1 |
| P05387 | 60S acidic ribosomal protein P2                                      | 2.17 | 0.116 | 1.5E-05 | 6  | 70.4 |
| P42766 | 60S ribosomal protein L35                                            | 2.17 | 0.080 | 1.8E-02 | 3  | 18.7 |
| P06753 | Tropomyosin alpha-3 chain                                            | 2.17 | 0.111 | 3.6E-05 | 4  | 13.0 |
| P13929 | Beta-enolase                                                         | 2.17 | NA    | NA      | 2  | 6.7  |
| Q9NPJ3 | Acyl-coenzyme A thioesterase 13                                      | 2.17 | NA    | NA      | 2  | 15.7 |
| O75390 | Citrate synthase, mitochondrial                                      | 2.16 | 0.071 | 4.8E-06 | 8  | 17.6 |
| Q15185 | Prostaglandin E synthase 3                                           | 2.16 | NA    | NA      | 2  | 9.4  |
| Q86UE4 | Protein LYRIC                                                        | 2.16 | 0.222 | 9.7E-03 | 3  | 5.8  |
| P08195 | 4F2 cell-surface antigen heavy chain                                 | 2.15 | 0.104 | 3.4E-05 | 8  | 16.5 |
| O95336 | 6-phosphogluconolactonase                                            | 2.14 | 0.238 | 5.4E-02 | 4  | 20.9 |
| Q92688 | Acidic leucine-rich nuclear phosphoprotein 32 family member B        | 2.14 | 0.135 | 2.3E-03 | 4  | 17.1 |
| P08107 | Heat shock 70 kDa protein 1A/1B                                      | 2.13 | 0.046 | 1.0E-07 | 16 | 28.7 |
| P30740 | Leukocyte elastase inhibitor                                         | 2.13 | 0.121 | 2.8E-02 | 5  | 14.0 |
| Q9HC38 | Glyoxalase domain-containing protein 4                               | 2.12 | 0.119 | 2.3E-02 | 3  | 8.0  |
| P13639 | Elongation factor 2                                                  | 2.12 | 0.086 | 5.0E-07 | 17 | 22.7 |
| Q96KP4 | Cytosolic non-specific dipeptidase                                   | 2.11 | 0.065 | 1.7E-03 | 4  | 11.8 |
| Q5JRX3 | Presequence protease, mitochondrial                                  | 2.10 | 0.184 | 9.5E-03 | 5  | 6.9  |
| P21283 | V-type proton ATPase subunit C 1                                     | 2.08 | 0.144 | 1.7E-02 | 4  | 9.9  |
| Q13126 | S-methyl-5'-thioadenosine phosphorylase                              | 2.05 | NA    | NA      | 2  | 7.8  |
| P02042 | Hemoglobin subunit delta                                             | 2.05 | NA    | NA      | 2  | 21.8 |
| Q9UH65 | Switch-associated protein 70                                         | 2.05 | 0.492 | 1.9E-01 | 3  | 3.2  |
| O76021 | Ribosomal L1 domain-containing protein 1                             | 2.04 | NA    | NA      | 2  | 4.3  |
| Q13442 | 28 kDa heat- and acid-stable phosphoprotein                          | 2.04 | 0.124 | 1.4E-01 | 3  | 23.2 |
| P02768 | Serum albumin                                                        | 2.04 | 0.039 | 5.8E-11 | 42 | 63.7 |
| Q07020 | 60S ribosomal protein L18                                            | 2.03 | 0.075 | 6.6E-05 | 3  | 19.7 |
| Q53EL6 | Programmed cell death protein 4                                      | 2.03 | 0.360 | 4.8E-01 | 5  | 13.6 |
| P42704 | Leucine-rich PPR motif-containing protein, mitochondrial             | 2.03 | 0.114 | 3.4E-04 | 14 | 10.8 |
| O00217 | NADH dehydrogenase [ubiquinone] iron-sulfur protein 8, mitochondrial | 2.03 | NA    | NA      | 2  | 9.5  |
| Q5VWZ2 | Lysophospholipase-like protein 1                                     | 2.02 | NA    | NA      | 2  | 8.0  |
| Q86VP6 | Cullin-associated NEDD8-dissociated protein 1                        | 2.02 | 0.089 | 7.0E-05 | 7  | 6.2  |
| Q07021 | Complement component 1 Q subcomponent-binding protein, mitochondrial | 2.01 | 0.107 | 1.8E-02 | 4  | 21.6 |
| Q12906 | Interleukin enhancer-binding factor 3                                | 2.01 | 0.081 | 1.2E-05 | 9  | 11.1 |
| Q53H82 | Beta-lactamase-like protein 2                                        | 2.01 | NA    | NA      | 2  | 9.4  |
| Q9BRA2 | Thioredoxin domain-containing protein 17                             | 2.00 | 0.397 | 2.2E-01 | 3  | 26.8 |
| P12236 | ADP/ATP translocase 3                                                | 2.00 | NA    | NA      | 2  | 7.0  |
| P55010 | Eukaryotic translation initiation factor 5                           | 2.00 | 0.336 | 2.9E-01 | 3  | 6.7  |
| Q14103 | Heterogeneous nuclear ribonucleoprotein D0                           | 1.99 | 0.085 | 2.0E-03 | 4  | 15.5 |
| P53597 | Succinyl-CoA ligase [ADP/GDP-forming] subunit alpha, mitochondrial   | 1.99 | 0.237 | 5.2E-02 | 6  | 21.4 |
| O43678 | NADH dehydrogenase [ubiquinone] 1 alpha subcomplex subunit 2         | 1.99 | NA    | NA      | 2  | 11.1 |
| Q5VTE0 | Putative elongation factor 1-alpha-like 3                            | 1.99 | 0.101 | 4.0E-04 | 10 | 24.0 |
| P48147 | Prolyl endopeptidase                                                 | 1.98 | NA    | NA      | 2  | 3.7  |
| Q92616 | Translational activator GCN1                                         | 1.98 | 0.201 | 5.0E-02 | 4  | 2.2  |
| P09622 | Dihydrolipoyl dehydrogenase, mitochondrial                           | 1.97 | 0.103 | 1.8E-02 | 6  | 12.6 |
| Q14974 | Importin subunit beta-1                                              | 1.96 | 0.098 | 1.3E-02 | 8  | 12.1 |
| P26641 | Elongation factor 1-gamma                                            | 1.95 | 0.076 | 1.1E-04 | 6  | 14.4 |
| P20618 | Proteasome subunit beta type-1                                       | 1.94 | NA    | NA      | 2  | 9.5  |
| Q13423 | NAD(P) transhydrogenase, mitochondrial                               | 1.92 | 0.112 | 1.4E-03 | 15 | 15.0 |
| P07919 | Cytochrome b-c1 complex subunit 6, mitochondrial                     | 1.91 | NA    | NA      | 2  | 26.4 |
| P02787 | Serotransferrin                                                      | 1.91 | 0.093 | 3.3E-05 | 11 | 18.5 |
| P38159 | RNA-binding motif protein, X chromosome                              | 1.91 | 0.073 | 2.9E-03 | 4  | 11.0 |
| P62847 | 40S ribosomal protein S24                                            | 1.90 | 0.107 | 5.5E-02 | 3  | 29.3 |
| P09651 | Heterogeneous nuclear ribonucleoprotein A1                           | 1.90 | 0.069 | 4.6E-06 | 11 | 37.9 |
| Q9NSD9 | Phenylalanine-tRNA ligase beta subunit                               | 1.89 | 0.136 | 2.1E-03 | 6  | 11.0 |
| P46776 | 60S ribosomal protein L27a                                           | 1.89 | NA    | NA      | 2  | 14.2 |
| P22314 | Ubiquitin-like modifier-activating enzyme 1                          | 1.89 | 0.105 | 2.6E-03 | 12 | 14.5 |
| P35237 | Serpin B6                                                            | 1.88 | NA    | NA      | 2  | 6.9  |
| Q15424 | Scaffold attachment factor B1                                        | 1.87 | 0.114 | 1.9E-01 | 3  | 3.7  |
| Q9BV36 | Melanophilin                                                         | 1.87 | NA    | NA      | 2  | 4.8  |
| P18669 | Phosphoglycerate mutase 1                                            | 1.87 | 0.097 | 8.4E-05 | 4  | 25.2 |
| P62851 | 40S ribosomal protein S25                                            | 1.87 | 0.080 | 4.8E-06 | 4  | 24.0 |
| P21796 | Voltage-dependent anion-selective channel protein 1                  | 1.87 | 0.070 | 2.2E-06 | 8  | 34.6 |
| Q9H4A4 | Aminopeptidase B                                                     | 1.87 | NA    | NA      | 2  | 4.2  |
| P31939 | Bifunctional purine biosynthesis protein PURH                        | 1.86 | 0.267 | 1.8E-01 | 6  | 13.5 |
| P35659 | Protein DEK                                                          | 1.86 | 0.068 | 2.9E-05 | 4  | 10.4 |
| Q9UBQ5 | Eukaryotic translation initiation factor 3 subunit K                 | 1.86 | NA    | NA      | 2  | 11.5 |
| Q9BZF1 | Oxysterol-binding protein-related protein 8                          | 1.86 | NA    | NA      | 2  | 2.8  |
| P31949 | Protein S100-A11                                                     | 1.85 | 0.470 | 4.9E-02 | 3  | 34.3 |
| P08574 | Cytochrome c1, heme protein, mitochondrial                           | 1.85 | NA    | NA      | 2  | 7.1  |
| P54652 | Heat shock-related 70 kDa protein 2                                  | 1.84 | 0.140 | 1.4E-02 | 11 | 20.7 |
| Q94826 | Mitochondrial import receptor subunit TOM70                          | 1.84 | 0.103 | 4.3E-05 | 9  | 17.3 |
| Q14157 | Ubiquitin-associated protein 2-like                                  | 1.84 | NA    | NA      | 2  | 2.5  |
| P24534 | Elongation factor 1-beta                                             | 1.84 | NA    | NA      | 2  | 10.7 |
| P09525 | Annexin A4                                                           | 1.83 | 0.736 | 4.6E-02 | 11 | 37.3 |
| Q9UNF0 | Protein kinase C and casein kinase substrate in neurons protein 2    | 1.83 | 0.260 | 7.9E-02 | 3  | 7.4  |
| Q13428 | Treacle protein                                                      | 1.82 | NA    | NA      | 2  | 1.6  |
| Q13435 | Splicing factor 3B subunit 2                                         | 1.81 | NA    | NA      | 2  | 3.0  |
| Q08380 | Galectin-3-binding protein                                           | 1.81 | 0.216 | 7.5E-02 | 3  | 7.0  |
| P18621 | 60S ribosomal protein L17                                            | 1.81 | 0.055 | 4.9E-03 | 4  | 27.2 |
| P51149 | Ras-related protein Rab-7a                                           | 1.81 | 0.138 | 5.4E-03 | 8  | 44.9 |
| P46777 | 60S ribosomal protein L5                                             | 1.80 | 0.180 | 7.1E-03 | 3  | 11.1 |
| O60506 | Heterogeneous nuclear ribonucleoprotein Q                            | 1.80 | 0.144 | 1.1E-02 | 5  | 9.6  |
| Q14240 | Eukaryotic initiation factor 4A-II                                   | 1.79 | 0.103 | 9.1E-03 | 3  | 8.8  |
| P00390 | Glutathione reductase, mitochondrial                                 | 1.79 | 0.141 | 2.4E-02 | 4  | 12.6 |

Table S6-Sample UM13

|        |                                                                                   |      |       |         |    |      |
|--------|-----------------------------------------------------------------------------------|------|-------|---------|----|------|
| Q99572 | P2X purinoceptor 7                                                                | 1.78 | 0.166 | 3.2E-01 | 4  | 9.6  |
| P49207 | 60S ribosomal protein L34                                                         | 1.78 | NA    | NA      | 2  | 12.8 |
| O14818 | Proteasome subunit alpha type-7                                                   | 1.78 | NA    | NA      | 2  | 6.9  |
| Q13011 | Delta(3,5)-Delta(2,4)-dienoyl-CoA isomerase, mitochondrial                        | 1.77 | 0.090 | 7.9E-04 | 5  | 13.7 |
| P35232 | Prohibitin                                                                        | 1.77 | 0.057 | 3.2E-06 | 9  | 39.3 |
| O15371 | Eukaryotic translation initiation factor 3 subunit D                              | 1.76 | NA    | NA      | 2  | 3.5  |
| P68871 | Hemoglobin subunit beta                                                           | 1.76 | 0.065 | 7.2E-06 | 6  | 55.8 |
| P61247 | 40S ribosomal protein S3a                                                         | 1.76 | 0.152 | 9.5E-04 | 10 | 43.2 |
| P62241 | 40S ribosomal protein S8                                                          | 1.75 | 0.073 | 7.9E-04 | 3  | 15.4 |
| P60866 | 40S ribosomal protein S20                                                         | 1.75 | 0.111 | 2.3E-03 | 4  | 28.6 |
| Q18698 | 2,4-dienoyl-CoA reductase, mitochondrial                                          | 1.75 | 0.110 | 2.5E-02 | 7  | 24.2 |
| P62857 | 40S ribosomal protein S28                                                         | 1.74 | NA    | NA      | 2  | 30.4 |
| P46783 | 40S ribosomal protein S10                                                         | 1.74 | 0.212 | 2.2E-02 | 3  | 23.6 |
| Q12905 | Interleukin enhancer-binding factor 2                                             | 1.74 | 0.148 | 2.6E-03 | 5  | 15.9 |
| Q1KMD3 | Heterogeneous nuclear ribonucleoprotein U-like protein 2                          | 1.73 | 0.143 | 3.8E-02 | 4  | 5.8  |
| O14980 | Exportin-1                                                                        | 1.73 | NA    | NA      | 2  | 2.6  |
| P25685 | DnaJ homolog subfamily B member 1                                                 | 1.73 | 0.188 | 4.7E-02 | 3  | 7.9  |
| P54136 | Arginine-tRNA ligase, cytoplasmic                                                 | 1.73 | 0.127 | 8.2E-02 | 3  | 5.5  |
| P05141 | ADP/ATP translocase 2                                                             | 1.73 | NA    | NA      | 2  | 7.7  |
| O60343 | TBC1 domain family member 4                                                       | 1.73 | 0.085 | 2.3E-02 | 3  | 3.5  |
| O15498 | Synaptobrevin homolog YKT6                                                        | 1.72 | NA    | NA      | 2  | 7.6  |
| P22626 | Heterogeneous nuclear ribonucleoproteins A2/B1                                    | 1.71 | 0.075 | 2.5E-06 | 13 | 36.3 |
| P02545 | Prelamin-A/C                                                                      | 1.71 | 0.031 | 0.0E+00 | 39 | 50.6 |
| P25398 | 40S ribosomal protein S12                                                         | 1.71 | NA    | NA      | 2  | 13.6 |
| Q9Y2Q3 | Glutathione S-transferase kappa 1                                                 | 1.70 | 0.054 | 8.1E-05 | 4  | 22.6 |
| P62424 | 60S ribosomal protein L7a                                                         | 1.69 | 0.136 | 2.2E-02 | 4  | 12.8 |
| P62263 | 40S ribosomal protein S14                                                         | 1.69 | NA    | NA      | 2  | 15.2 |
| P62249 | 40S ribosomal protein S16                                                         | 1.69 | 0.063 | 7.7E-04 | 5  | 35.6 |
| P14868 | Aspartate-tRNA ligase, cytoplasmic                                                | 1.69 | 0.117 | 4.0E-02 | 5  | 12.0 |
| P16152 | Carbonyl reductase [NADPH] 1                                                      | 1.69 | 0.424 | 3.2E-01 | 5  | 25.6 |
| Q00839 | Heterogeneous nuclear ribonucleoprotein U                                         | 1.69 | 0.123 | 5.2E-02 | 12 | 13.9 |
| P15880 | 40S ribosomal protein S2                                                          | 1.69 | 0.125 | 4.2E-03 | 4  | 17.4 |
| Q14247 | Src substrate cactactin                                                           | 1.68 | 0.253 | 1.5E-01 | 4  | 8.2  |
| Q95202 | LETM1 and EF-hand domain-containing protein 1, mitochondrial                      | 1.68 | 0.154 | 1.7E-02 | 4  | 6.2  |
| P39687 | Acidic leucine-rich nuclear phosphoprotein 32 family member A                     | 1.67 | 0.316 | 1.9E-01 | 3  | 14.1 |
| P25786 | Proteasome subunit alpha type-1                                                   | 1.67 | 0.193 | 1.1E-01 | 5  | 20.2 |
| P84077 | ADP-ribosylation factor 1                                                         | 1.67 | NA    | NA      | 2  | 9.9  |
| P09874 | Poly [ADP-ribose] polymerase 1                                                    | 1.66 | 0.114 | 6.2E-04 | 10 | 11.5 |
| Q08211 | ATP-dependent RNA helicase A                                                      | 1.66 | 0.210 | 2.3E-02 | 10 | 10.9 |
| P26373 | 60S ribosomal protein L13                                                         | 1.66 | 0.166 | 4.8E-02 | 4  | 19.9 |
| Q8IZQ5 | Selenoprotein H                                                                   | 1.66 | NA    | NA      | 2  | 20.5 |
| Q9UBQ7 | Glyoxylate reductase/hydroxypyruvate reductase                                    | 1.66 | 0.290 | 1.8E-01 | 4  | 21.6 |
| Q15181 | Inorganic pyrophosphatase                                                         | 1.66 | 0.234 | 1.0E-01 | 3  | 10.4 |
| P83731 | 60S ribosomal protein L24                                                         | 1.65 | 0.099 | 2.2E-02 | 3  | 16.6 |
| P06576 | ATP synthase subunit beta, mitochondrial                                          | 1.65 | 0.060 | 5.0E-05 | 19 | 42.2 |
| Q13510 | Acid ceramidase                                                                   | 1.65 | 0.116 | 1.4E-03 | 6  | 17.0 |
| Q5JTV8 | Torsin-1A-interacting protein 1                                                   | 1.64 | 0.317 | 2.2E-01 | 3  | 7.9  |
| P54819 | Adenylate kinase 2, mitochondrial                                                 | 1.62 | NA    | NA      | 2  | 10.9 |
| P62280 | 40S ribosomal protein S11                                                         | 1.62 | 0.628 | 3.5E-01 | 3  | 17.7 |
| P60900 | Proteasome subunit alpha type-6                                                   | 1.62 | NA    | NA      | 2  | 8.5  |
| P11216 | Glycogen phosphorylase, brain form                                                | 1.60 | 0.073 | 1.9E-05 | 8  | 11.9 |
| Q86WA6 | Valacyclovir hydrolase                                                            | 1.60 | NA    | NA      | 2  | 7.2  |
| P12270 | Nucleoprotein TPR                                                                 | 1.60 | 0.087 | 1.1E-03 | 9  | 5.5  |
| Q96AG4 | Leucine-rich repeat-containing protein 59                                         | 1.59 | 0.124 | 1.1E-02 | 4  | 14.7 |
| P08670 | Vimentin                                                                          | 1.59 | 0.043 | 1.6E-09 | 31 | 58.2 |
| O75083 | WD repeat-containing protein 1                                                    | 1.59 | 0.112 | 3.6E-03 | 8  | 15.7 |
| Q96GK7 | Fumarylacetoacetate hydrolase domain-containing protein 2A                        | 1.59 | 0.353 | 4.0E-01 | 3  | 10.8 |
| P69905 | Hemoglobin subunit alpha                                                          | 1.58 | 0.075 | 1.0E-03 | 8  | 68.3 |
| P08865 | 40S ribosomal protein SA                                                          | 1.58 | 0.134 | 3.5E-03 | 6  | 26.8 |
| P46779 | 60S ribosomal protein L28                                                         | 1.58 | NA    | NA      | 2  | 13.1 |
| P12956 | X-ray repair cross-complementing protein 6                                        | 1.58 | 0.086 | 1.1E-04 | 13 | 24.8 |
| P40967 | Melanocyte protein PMEL                                                           | 1.58 | NA    | NA      | 2  | 3.3  |
| Q9NY12 | H/ACA ribonucleoprotein complex subunit 1                                         | 1.58 | NA    | NA      | 2  | 7.4  |
| Q9Y376 | Calcium-binding protein 39                                                        | 1.58 | NA    | NA      | 2  | 4.7  |
| P50502 | Hsc70-interacting protein                                                         | 1.58 | 0.145 | 2.4E-02 | 6  | 14.1 |
| Q6DK11 | 60S ribosomal protein L7-like 1                                                   | 1.57 | NA    | NA      | 2  | 11.0 |
| Q9H2U2 | Inorganic pyrophosphatase 2, mitochondrial                                        | 1.57 | 0.159 | 4.8E-02 | 4  | 13.2 |
| Q9H0U4 | Ras-related protein Rab-1B                                                        | 1.57 | NA    | NA      | 2  | 15.4 |
| Q01130 | Serine/arginine-rich splicing factor 2                                            | 1.55 | 0.118 | 9.4E-02 | 3  | 13.6 |
| Q86UY8 | 5'-nucleotidase domain-containing protein 3                                       | 1.55 | NA    | NA      | 2  | 3.6  |
| P67870 | Casein kinase II subunit beta                                                     | 1.55 | NA    | NA      | 2  | 10.2 |
| Q9UJ50 | Calcium-binding mitochondrial carrier protein Aralar2                             | 1.54 | 0.077 | 7.3E-03 | 4  | 8.3  |
| P04075 | Fructose-bisphosphate aldolase A                                                  | 1.54 | 0.089 | 3.9E-03 | 14 | 44.5 |
| P49792 | E3 SUMO-protein ligase RanBP2                                                     | 1.54 | NA    | NA      | 2  | 0.2  |
| P05388 | 60S acidic ribosomal protein P0                                                   | 1.54 | 0.101 | 1.4E-02 | 6  | 19.6 |
| Q9UKV3 | Apoptotic chromatin condensation inducer in the nucleus                           | 1.54 | 0.131 | 1.7E-01 | 3  | 2.9  |
| P61313 | 60S ribosomal protein L15                                                         | 1.53 | NA    | NA      | 2  | 10.3 |
| P61978 | Heterogeneous nuclear ribonucleoprotein K                                         | 1.53 | 0.123 | 5.6E-03 | 15 | 38.9 |
| P51810 | G-protein coupled receptor 143                                                    | 1.53 | 0.461 | 5.0E-01 | 3  | 9.9  |
| P14618 | Pyruvate kinase PKM                                                               | 1.53 | 0.082 | 4.1E-05 | 12 | 24.9 |
| P30048 | Thioredoxin-dependent peroxide reductase, mitochondrial                           | 1.53 | 0.064 | 1.3E-04 | 5  | 36.3 |
| P62906 | 60S ribosomal protein L10a                                                        | 1.52 | 0.097 | 1.4E-03 | 7  | 33.6 |
| P49755 | Transmembrane emp24 domain-containing protein 10                                  | 1.52 | NA    | NA      | 2  | 9.1  |
| O00560 | Syntenin-1                                                                        | 1.52 | NA    | NA      | 2  | 7.0  |
| Q09028 | Histone-binding protein RBBP4                                                     | 1.52 | NA    | NA      | 2  | 8.2  |
| P06737 | Glycogen phosphorylase, liver form                                                | 1.52 | 0.094 | 3.2E-02 | 5  | 7.9  |
| P42765 | 3-ketoacyl-CoA thiolase, mitochondrial                                            | 1.52 | 0.139 | 1.8E-02 | 8  | 23.7 |
| O96000 | NADH dehydrogenase [ubiquinone] 1 beta subcomplex subunit 10                      | 1.52 | 0.171 | 8.9E-02 | 3  | 25.0 |
| Q99623 | Prohibitin-2                                                                      | 1.52 | 0.071 | 3.6E-03 | 11 | 44.1 |
| P50914 | 60S ribosomal protein L14                                                         | 1.52 | 0.062 | 8.9E-04 | 4  | 20.9 |
| Q9UHX1 | Poly(U)-binding-splicing factor PUF60                                             | 1.52 | 0.080 | 1.2E-02 | 4  | 8.9  |
| P48681 | Nestin                                                                            | 1.52 | 0.008 | 6.6E-03 | 3  | 2.5  |
| Q8N5K1 | CDGSH iron-sulfur domain-containing protein 2                                     | 1.52 | 0.165 | 4.2E-02 | 4  | 34.1 |
| P43304 | Glycerol-3-phosphate dehydrogenase, mitochondrial                                 | 1.51 | NA    | NA      | 2  | 2.5  |
| Q06323 | Proteasome activator complex subunit 1                                            | 1.51 | 0.052 | 1.4E-03 | 6  | 22.9 |
| Q9P2E9 | Ribosome-binding protein 1                                                        | 1.50 | 0.101 | 1.7E-02 | 12 | 9.7  |
| Q8NBS9 | Thioredoxin domain-containing protein 5                                           | 1.50 | 0.077 | 2.9E-02 | 8  | 16.7 |
| P30153 | Serine/threonine-protein phosphatase 2A 65 kDa regulatory subunit A alpha isoform | 1.50 | 0.038 | 8.7E-02 | 6  | 11.4 |
| P36543 | V-type proton ATPase subunit E 1                                                  | 1.49 | 0.130 | 1.1E-01 | 3  | 10.6 |
| P55786 | Puromycin-sensitive aminopeptidase                                                | 1.49 | 0.115 | 2.7E-02 | 4  | 4.6  |
| P19404 | NADH dehydrogenase [ubiquinone] flavoprotein 2, mitochondrial                     | 1.49 | NA    | NA      | 2  | 9.2  |
| P36578 | 60S ribosomal protein L4                                                          | 1.48 | 0.142 | 2.1E-02 | 8  | 21.1 |
| P49721 | Proteasome subunit beta type-2                                                    | 1.48 | 0.522 | 4.9E-01 | 3  | 13.9 |
| Q15907 | Ras-related protein Rab-11B                                                       | 1.48 | 0.121 | 8.6E-02 | 3  | 14.7 |
| P55265 | Double-stranded RNA-specific adenosine deaminase                                  | 1.48 | 0.172 | 2.1E-01 | 4  | 3.6  |
| O14880 | Microsomal glutathione S-transferase 3                                            | 1.48 | 0.054 | 3.8E-02 | 3  | 25.7 |
| Q8NC56 | LEM domain-containing protein 2                                                   | 1.48 | 0.139 | 2.5E-02 | 5  | 11.1 |
| P26640 | Valine-tRNA ligase                                                                | 1.48 | 0.408 | 2.1E-01 | 5  | 5.3  |
| Q9UL46 | Proteasome activator complex subunit 2                                            | 1.47 | NA    | NA      | 2  | 11.3 |
| P31153 | S-adenosylmethionine synthase isoform type-2                                      | 1.47 | 0.226 | 1.2E-01 | 3  | 9.4  |
| P04350 | Tubulin beta-4A chain                                                             | 1.47 | 0.586 | 2.5E-01 | 4  | 14.2 |
| O75306 | NADH dehydrogenase [ubiquinone] iron-sulfur protein 2, mitochondrial              | 1.46 | 0.084 | 2.2E-02 | 4  | 8.9  |
| P51991 | Heterogeneous nuclear ribonucleoprotein A3                                        | 1.46 | 0.066 | 3.4E-04 | 8  | 26.2 |
| P46926 | Glucosamine-6-phosphate isomerase 1                                               | 1.46 | 0.281 | 2.5E-01 | 3  | 8.0  |
| Q14152 | Eukaryotic translation initiation factor 3 subunit A                              | 1.46 | 0.112 | 2.3E-02 | 7  | 6.4  |

Table S6-Sample UM13

|        |                                                                                                                   |      |       |         |    |      |
|--------|-------------------------------------------------------------------------------------------------------------------|------|-------|---------|----|------|
| P28066 | Proteasome subunit alpha type-5                                                                                   | 1.46 | 0.054 | 1.2E-02 | 3  | 20.7 |
| P19367 | Hexokinase-1                                                                                                      | 1.45 | 0.136 | 2.7E-01 | 13 | 16.5 |
| Q02878 | 60S ribosomal protein L6                                                                                          | 1.45 | 0.131 | 3.7E-02 | 6  | 21.5 |
| Q12904 | Aminoacyl tRNA synthase complex-interacting multifunctional protein 1                                             | 1.44 | NA    | NA      | 2  | 9.6  |
| P17858 | ATP-dependent 6-phosphofructokinase, liver type                                                                   | 1.44 | 0.102 | 5.8E-02 | 5  | 8.3  |
| Q9HAV7 | GrpE protein homolog 1, mitochondrial                                                                             | 1.44 | NA    | NA      | 2  | 12.0 |
| B5ME19 | Eukaryotic translation initiation factor 3 subunit C-like protein                                                 | 1.44 | 0.105 | 1.3E-02 | 3  | 3.4  |
| Q14165 | Malectin                                                                                                          | 1.43 | NA    | NA      | 2  | 5.5  |
| P62158 | Calmodulin                                                                                                        | 1.43 | 0.175 | 3.8E-02 | 3  | 22.1 |
| P39019 | 40S ribosomal protein S19                                                                                         | 1.43 | 0.142 | 1.4E-02 | 5  | 29.7 |
| Q9Y2B0 | Protein canopy homolog 2                                                                                          | 1.43 | NA    | NA      | 2  | 13.7 |
| P78371 | T-complex protein 1 subunit beta                                                                                  | 1.42 | 0.683 | 5.3E-01 | 3  | 7.7  |
| Q02818 | Nucleobindin-1                                                                                                    | 1.42 | 0.171 | 1.3E-01 | 5  | 15.0 |
| P45880 | Voltage-dependent anion-selective channel protein 2                                                               | 1.42 | 0.055 | 4.1E-05 | 8  | 27.2 |
| P27816 | Microtubule-associated protein 4                                                                                  | 1.42 | 0.078 | 1.6E-02 | 4  | 5.1  |
| P23396 | 40S ribosomal protein S3                                                                                          | 1.42 | 0.112 | 3.9E-03 | 8  | 30.5 |
| Q3ZCQ8 | Mitochondrial import inner membrane translocase subunit TIM50                                                     | 1.41 | 0.049 | 3.8E-02 | 3  | 13.0 |
| P31040 | Succinate dehydrogenase [ubiquinone] flavoprotein subunit, mitochondrial                                          | 1.41 | 0.433 | 2.6E-01 | 6  | 12.3 |
| O75533 | Splicing factor 3B subunit 1                                                                                      | 1.40 | 0.219 | 2.7E-01 | 3  | 3.1  |
| Q9Y277 | Voltage-dependent anion-selective channel protein 3                                                               | 1.40 | 0.180 | 4.2E-02 | 7  | 26.1 |
| Q02252 | Methylmalonate-semialdehyde dehydrogenase [acylating], mitochondrial                                              | 1.40 | 0.099 | 1.7E-01 | 3  | 6.4  |
| P62753 | 40S ribosomal protein S6                                                                                          | 1.40 | 0.117 | 1.1E-02 | 4  | 16.9 |
| Q13151 | Heterogeneous nuclear ribonucleoprotein A0                                                                        | 1.40 | 0.287 | 2.5E-01 | 3  | 7.5  |
| Q9Y262 | Eukaryotic translation initiation factor 3 subunit L                                                              | 1.40 | 0.193 | 2.1E-01 | 3  | 4.4  |
| O95292 | Vesicle-associated membrane protein-associated protein B/C                                                        | 1.40 | NA    | NA      | 2  | 13.6 |
| O75947 | ATP synthase subunit d, mitochondrial                                                                             | 1.39 | 0.122 | 3.8E-01 | 7  | 57.8 |
| Q99471 | Prefoldin subunit 5                                                                                               | 1.39 | NA    | NA      | 2  | 9.7  |
| P54727 | UV excision repair protein RAD23 homolog B                                                                        | 1.38 | 2.868 | 5.6E-01 | 3  | 8.8  |
| Q9H7C9 | Mth938 domain-containing protein                                                                                  | 1.38 | NA    | NA      | 2  | 20.5 |
| P27635 | 60S ribosomal protein L10                                                                                         | 1.38 | 0.163 | 6.4E-01 | 3  | 15.9 |
| P49821 | NADH dehydrogenase [ubiquinone] flavoprotein 1, mitochondrial                                                     | 1.38 | 0.060 | 6.6E-02 | 3  | 6.0  |
| Q16718 | NADH dehydrogenase [ubiquinone] 1 alpha subcomplex subunit 5                                                      | 1.37 | NA    | NA      | 2  | 22.4 |
| O75367 | Core histone macro-H2A.1                                                                                          | 1.37 | 0.120 | 1.0E-02 | 10 | 30.1 |
| P13010 | X-ray repair cross-complementing protein 5                                                                        | 1.37 | 0.229 | 1.3E-01 | 7  | 14.1 |
| O95831 | Apoptosis-inducing factor 1, mitochondrial                                                                        | 1.37 | NA    | NA      | 2  | 5.2  |
| Q9NX63 | Coiled-coil-helix-coiled-coil-helix domain-containing protein 3, mitochondrial                                    | 1.37 | 0.121 | 3.4E-02 | 3  | 12.3 |
| P25705 | ATP synthase subunit alpha, mitochondrial                                                                         | 1.37 | 0.067 | 4.6E-04 | 19 | 42.1 |
| P38117 | Electron transfer flavoprotein subunit beta                                                                       | 1.37 | 0.139 | 1.4E-01 | 3  | 14.1 |
| P11142 | Heat shock cognate 71 kDa protein                                                                                 | 1.37 | 0.061 | 1.0E-03 | 12 | 22.8 |
| P54709 | Sodium/potassium-transporting ATPase subunit beta-3                                                               | 1.36 | 0.135 | 9.4E-02 | 10 | 38.7 |
| P42167 | Lamina-associated polypeptide 2, isoforms beta/gamma                                                              | 1.36 | 0.098 | 2.4E-02 | 6  | 16.3 |
| P50402 | Emerin                                                                                                            | 1.36 | NA    | NA      | 2  | 9.8  |
| P08237 | ATP-dependent 6-phosphofructokinase, muscle type                                                                  | 1.35 | 0.817 | 2.1E-01 | 5  | 9.0  |
| P62081 | 40S ribosomal protein S7                                                                                          | 1.35 | 0.153 | 4.3E-01 | 3  | 14.9 |
| Q12913 | Receptor-type tyrosine-protein phosphatase eta                                                                    | 1.35 | NA    | NA      | 2  | 1.9  |
| Q9UKM9 | RNA-binding protein Raly                                                                                          | 1.35 | NA    | NA      | 2  | 10.1 |
| P36957 | Dihydropyridyllysine-residue succinyltransferase component of 2-oxoglutarate dehydrogenase complex, mitochondrial | 1.35 | 0.112 | 1.3E-01 | 7  | 16.3 |
| P30533 | Alpha-2-macroglobulin receptor-associated protein                                                                 | 1.34 | 0.130 | 1.7E-01 | 3  | 7.8  |
| O14561 | Acyl carrier protein, mitochondrial                                                                               | 1.34 | 0.269 | 3.2E-01 | 4  | 19.2 |
| P37802 | Transgelin-2                                                                                                      | 1.34 | 0.151 | 7.4E-02 | 4  | 22.6 |
| P39023 | 60S ribosomal protein L3                                                                                          | 1.34 | NA    | NA      | 2  | 6.9  |
| P01023 | Alpha-2-macroglobulin                                                                                             | 1.32 | 0.102 | 7.4E-03 | 13 | 11.7 |
| P09493 | Tropomyosin alpha-1 chain                                                                                         | 1.32 | 1.053 | 4.9E-01 | 4  | 12.0 |
| Q96A33 | Coiled-coil domain-containing protein 47                                                                          | 1.32 | NA    | NA      | 2  | 4.3  |
| Q05519 | Serine/arginine-rich splicing factor 11                                                                           | 1.31 | NA    | NA      | 2  | 6.0  |
| P60228 | Eukaryotic translation initiation factor 3 subunit E                                                              | 1.31 | NA    | NA      | 2  | 4.9  |
| O75964 | ATP synthase subunit g, mitochondrial                                                                             | 1.31 | NA    | NA      | 2  | 21.4 |
| O75489 | NADH dehydrogenase [ubiquinone] iron-sulfur protein 3, mitochondrial                                              | 1.31 | 0.246 | 2.8E-01 | 4  | 14.4 |
| Q92945 | Far upstream element-binding protein 2                                                                            | 1.31 | 0.263 | 1.6E-01 | 7  | 10.0 |
| P10644 | cAMP-dependent protein kinase type I-alpha regulatory subunit                                                     | 1.31 | NA    | NA      | 2  | 7.1  |
| Q02543 | 60S ribosomal protein L18a                                                                                        | 1.31 | 0.195 | 2.0E-01 | 3  | 18.2 |
| Q13405 | 39S ribosomal protein L49, mitochondrial                                                                          | 1.31 | NA    | NA      | 2  | 12.0 |
| P20700 | Lamin-B1                                                                                                          | 1.30 | 0.155 | 2.0E-01 | 8  | 14.5 |
| O75521 | Enoyl-CoA delta isomerase 2, mitochondrial                                                                        | 1.30 | NA    | NA      | 2  | 5.6  |
| Q13228 | Selenium-binding protein 1                                                                                        | 1.30 | 0.216 | 1.3E-01 | 7  | 15.5 |
| P21281 | V-type proton ATPase subunit B, brain isoform                                                                     | 1.29 | 0.077 | 1.0E-01 | 5  | 14.1 |
| Q9UHQ9 | NADH-cytochrome b5 reductase 1                                                                                    | 1.29 | 0.209 | 1.3E-01 | 8  | 32.1 |
| P14866 | Heterogeneous nuclear ribonucleoprotein L                                                                         | 1.29 | 0.183 | 8.9E-02 | 7  | 19.2 |
| P56192 | Methionine-tRNA ligase, cytoplasmic                                                                               | 1.29 | NA    | NA      | 2  | 3.9  |
| Q00341 | Vigilin                                                                                                           | 1.29 | NA    | NA      | 2  | 1.7  |
| P40429 | 60S ribosomal protein L13a                                                                                        | 1.28 | 0.291 | 4.2E-01 | 3  | 15.3 |
| P28331 | NADH-ubiquinone oxidoreductase 75 kDa subunit, mitochondrial                                                      | 1.28 | NA    | NA      | 2  | 4.1  |
| P61225 | Ras-related protein Rap-2b                                                                                        | 1.28 | NA    | NA      | 2  | 11.5 |
| Q96AE4 | Far upstream element-binding protein 1                                                                            | 1.27 | NA    | NA      | 2  | 2.6  |
| P51608 | Methyl-CpG-binding protein 2                                                                                      | 1.27 | 0.771 | 6.4E-01 | 5  | 10.3 |
| P53618 | Coatomer subunit beta                                                                                             | 1.27 | 0.008 | 1.5E-03 | 4  | 5.4  |
| P02790 | Hemopexin                                                                                                         | 1.27 | NA    | NA      | 2  | 4.3  |
| Q9BZQ8 | Protein Niban                                                                                                     | 1.27 | 0.203 | 1.4E-01 | 5  | 5.4  |
| P23368 | NAD-dependent malic enzyme, mitochondrial                                                                         | 1.27 | NA    | NA      | 2  | 4.1  |
| P52597 | Heterogeneous nuclear ribonucleoprotein F                                                                         | 1.27 | 0.092 | 2.5E-01 | 3  | 6.0  |
| O75131 | Copine-3                                                                                                          | 1.26 | 1.222 | 1.3E-01 | 6  | 11.9 |
| P38606 | V-type proton ATPase catalytic subunit A                                                                          | 1.26 | NA    | NA      | 2  | 3.1  |
| P46778 | 60S ribosomal protein L21                                                                                         | 1.26 | NA    | NA      | 2  | 14.4 |
| P23246 | Splicing factor, proline- and glutamine-rich                                                                      | 1.26 | 0.213 | 8.4E-02 | 7  | 11.7 |
| O60486 | Plexin-C1                                                                                                         | 1.26 | 0.398 | 1.8E-01 | 4  | 2.6  |
| P62829 | 60S ribosomal protein L23                                                                                         | 1.26 | 0.238 | 4.1E-01 | 3  | 30.7 |
| Q9UMX5 | Neudesin                                                                                                          | 1.26 | NA    | NA      | 2  | 16.9 |
| O14949 | Cytochrome b-c1 complex subunit 8                                                                                 | 1.25 | 0.005 | 1.7E-02 | 3  | 37.8 |
| Q86UP2 | Kinectin                                                                                                          | 1.25 | 0.206 | 2.1E-01 | 10 | 10.5 |
| P78527 | DNA-dependent protein kinase catalytic subunit                                                                    | 1.25 | 0.118 | 5.0E-02 | 17 | 4.4  |
| Q9BRX8 | Redox-regulatory protein FAM213A                                                                                  | 1.25 | 0.215 | 1.4E-01 | 6  | 29.7 |
| P48047 | ATP synthase subunit O, mitochondrial                                                                             | 1.25 | 0.434 | 1.0E-01 | 5  | 36.6 |
| P51398 | 28S ribosomal protein S29, mitochondrial                                                                          | 1.25 | NA    | NA      | 2  | 6.5  |
| P26368 | Splicing factor U2AF 65 kDa subunit                                                                               | 1.24 | 0.205 | 1.7E-01 | 3  | 7.6  |
| P34932 | Heat shock 70 kDa protein 4                                                                                       | 1.24 | 0.770 | 4.3E-01 | 4  | 6.0  |
| P04040 | Catalase                                                                                                          | 1.24 | 0.725 | 4.9E-01 | 4  | 11.0 |
| O15144 | Actin-related protein 2/3 complex subunit 2                                                                       | 1.24 | 0.289 | 2.8E-01 | 4  | 13.0 |
| Q14697 | Neutral alpha-glucosidase AB                                                                                      | 1.24 | 0.234 | 6.3E-02 | 13 | 14.1 |
| P43243 | Matrin-3                                                                                                          | 1.23 | 0.140 | 2.1E-01 | 5  | 9.4  |
| P62913 | 60S ribosomal protein L11                                                                                         | 1.23 | 0.162 | 1.6E-01 | 3  | 16.9 |
| P61353 | 60S ribosomal protein L27                                                                                         | 1.23 | NA    | NA      | 2  | 12.5 |
| P00505 | Aspartate aminotransferase, mitochondrial                                                                         | 1.23 | 0.092 | 1.9E-02 | 6  | 16.7 |
| P61019 | Ras-related protein Rab-2A                                                                                        | 1.22 | NA    | NA      | 2  | 12.3 |
| P62701 | 40S ribosomal protein S4, X isoform                                                                               | 1.22 | 0.110 | 7.7E-02 | 8  | 30.0 |
| Q8NBJ5 | Procollagen galactosyltransferase 1                                                                               | 1.22 | NA    | NA      | 2  | 3.4  |
| P51572 | B-cell receptor-associated protein 31                                                                             | 1.21 | 0.193 | 1.9E-01 | 8  | 29.7 |
| P18124 | 60S ribosomal protein L7                                                                                          | 1.21 | 0.057 | 3.2E-03 | 5  | 15.7 |
| P40227 | T-complex protein 1 subunit zeta                                                                                  | 1.21 | 0.733 | 6.4E-01 | 3  | 7.0  |
| Q99714 | 3-hydroxyacyl-CoA dehydrogenase type-2                                                                            | 1.21 | NA    | NA      | 2  | 8.4  |
| P46782 | 40S ribosomal protein S5                                                                                          | 1.21 | NA    | NA      | 2  | 8.3  |
| P11586 | C-1-tetrahydrofolate synthase, cytoplasmic                                                                        | 1.21 | 0.169 | 4.7E-01 | 4  | 4.8  |
| P01860 | Ig gamma-3 chain C region                                                                                         | 1.21 | NA    | NA      | 2  | 6.4  |
| P51970 | NADH dehydrogenase [ubiquinone] 1 alpha subcomplex subunit 8                                                      | 1.21 | 0.300 | 3.2E-01 | 4  | 19.8 |
| P78347 | General transcription factor II-I                                                                                 | 1.20 | 0.464 | 4.8E-01 | 3  | 3.4  |
| Q9BXP5 | Serrate RNA effector molecule homolog                                                                             | 1.19 | NA    | NA      | 2  | 2.1  |

Table S6-Sample UM13

|        |                                                                             |      |        |         |    |      |
|--------|-----------------------------------------------------------------------------|------|--------|---------|----|------|
| P35998 | 26S protease regulatory subunit 7                                           | 1.19 | 0.264  | 2.1E-01 | 4  | 10.6 |
| P24752 | Acetyl-CoA acetyltransferase, mitochondrial                                 | 1.19 | 1.877  | 2.5E-01 | 7  | 12.4 |
| Q16666 | Gamma-interferon-inducible protein 16                                       | 1.19 | 0.054  | 1.5E-01 | 3  | 3.7  |
| P47985 | Cytochrome b-c1 complex subunit Rieske, mitochondrial                       | 1.19 | NA     | NA      | 2  | 10.9 |
| P14314 | Glucosidase 2 subunit beta                                                  | 1.19 | 0.188  | 3.1E-01 | 9  | 14.0 |
| P0C0S8 | Histone H2A type 1                                                          | 1.19 | 0.167  | 5.3E-02 | 3  | 28.5 |
| P49411 | Elongation factor Tu, mitochondrial                                         | 1.19 | 0.344  | 4.6E-02 | 9  | 25.9 |
| P46781 | 40S ribosomal protein S9                                                    | 1.19 | 0.098  | 2.0E-01 | 6  | 23.7 |
| O60313 | Dynamin-like 120 kDa protein, mitochondrial                                 | 1.18 | 0.257  | 1.8E-01 | 7  | 9.4  |
| Q5SSJ5 | Heterochromatin protein 1-binding protein 3                                 | 1.18 | NA     | NA      | 2  | 5.4  |
| Q5JWF2 | Guanine nucleotide-binding protein G(s) subunit alpha isoforms XLas         | 1.18 | 0.143  | 3.3E-01 | 8  | 8.5  |
| Q9BZZ5 | Apoptosis inhibitor 5                                                       | 1.18 | NA     | NA      | 2  | 4.8  |
| P61160 | Actin-related protein 2                                                     | 1.18 | 0.825  | 3.3E-01 | 4  | 12.9 |
| O00299 | Chloride intracellular channel protein 1                                    | 1.18 | NA     | NA      | 2  | 10.0 |
| P32969 | 60S ribosomal protein L9                                                    | 1.18 | 0.209  | 2.4E-01 | 3  | 18.2 |
| P05198 | Eukaryotic translation initiation factor 2 subunit 1                        | 1.17 | 0.753  | 6.7E-01 | 4  | 14.9 |
| P09669 | Cytochrome c oxidase subunit 6C                                             | 1.17 | 0.519  | 5.3E-01 | 3  | 38.7 |
| Q9BQI0 | Allograft inflammatory factor 1-like                                        | 1.16 | 0.198  | 4.3E-01 | 3  | 16.0 |
| Q9P0J0 | NADH dehydrogenase [ubiquinone] 1 alpha subcomplex subunit 13               | 1.16 | NA     | NA      | 2  | 6.9  |
| Q7KZF4 | Staphylococcal nuclease domain-containing protein 1                         | 1.16 | 0.198  | 5.5E-01 | 4  | 6.4  |
| P14854 | Cytochrome c oxidase subunit 6B1                                            | 1.16 | 1.526  | 8.7E-01 | 4  | 37.2 |
| Q00325 | Phosphate carrier protein, mitochondrial                                    | 1.15 | 0.067  | 4.9E-02 | 8  | 21.3 |
| P36542 | ATP synthase subunit gamma, mitochondrial                                   | 1.14 | 0.556  | 4.9E-01 | 3  | 11.1 |
| Q8TAQ2 | SWI/SNF complex subunit SMARCC2                                             | 1.14 | 0.093  | 3.0E-01 | 3  | 2.6  |
| P53621 | Coatomer subunit alpha                                                      | 1.14 | 0.951  | 5.5E-01 | 6  | 6.5  |
| P62333 | 26S protease regulatory subunit 10B                                         | 1.14 | NA     | NA      | 2  | 6.7  |
| Q13162 | Peroxisomal protein 4                                                       | 1.14 | NA     | NA      | 2  | 8.9  |
| P49588 | Alanine-tRNA ligase, cytoplasmic                                            | 1.13 | NA     | NA      | 2  | 2.4  |
| Q13825 | Methylglutaconyl-CoA hydratase, mitochondrial                               | 1.13 | NA     | NA      | 2  | 8.3  |
| Q94832 | Unconventional myosin-Id                                                    | 1.13 | 0.168  | 2.2E-01 | 10 | 11.3 |
| Q9BUJ2 | Heterogeneous nuclear ribonucleoprotein U-like protein 1                    | 1.12 | NA     | NA      | 2  | 3.9  |
| P26038 | Moesin                                                                      | 1.12 | 0.294  | 2.5E-01 | 10 | 16.6 |
| P62888 | 60S ribosomal protein L30                                                   | 1.12 | NA     | NA      | 2  | 20.9 |
| Q13263 | Transcription intermediary factor 1-beta                                    | 1.12 | 0.368  | 4.4E-01 | 6  | 9.5  |
| P35637 | RNA-binding protein FUS                                                     | 1.12 | 41.860 | 4.9E-01 | 4  | 6.1  |
| Q06210 | Glutamine-fructose-6-phosphate aminotransferase [isomerizing] 1             | 1.11 | NA     | NA      | 2  | 3.7  |
| P21912 | Succinate dehydrogenase [ubiquinone] iron-sulfur subunit, mitochondrial     | 1.11 | 34.278 | 6.6E-01 | 3  | 13.2 |
| P11310 | Medium-chain specific acyl-CoA dehydrogenase, mitochondrial                 | 1.11 | 1.046  | 5.4E-01 | 3  | 7.4  |
| Q8N163 | Cell cycle and apoptosis regulator protein 2                                | 1.11 | NA     | NA      | 2  | 3.7  |
| Q9UQE7 | Structural maintenance of chromosomes protein 3                             | 1.10 | 2.636  | 8.3E-01 | 3  | 3.9  |
| P27708 | CAD protein                                                                 | 1.10 | 1.805  | 8.5E-01 | 3  | 1.7  |
| P43686 | 26S protease regulatory subunit 6B                                          | 1.10 | NA     | NA      | 2  | 6.0  |
| O15173 | Membrane-associated progesterone receptor component 2                       | 1.10 | 0.778  | 7.2E-01 | 3  | 18.4 |
| Q02790 | Peptidyl-prolyl cis-trans isomerase FKBP4                                   | 1.10 | 0.381  | 7.8E-01 | 3  | 6.1  |
| Q9P0K7 | Ankyrin                                                                     | 1.10 | NA     | NA      | 2  | 2.6  |
| O43852 | Calumenin                                                                   | 1.09 | 0.032  | 1.8E-01 | 4  | 13.7 |
| Q9P2R7 | Succinyl-CoA ligase [ADP-forming] subunit beta, mitochondrial               | 1.09 | 0.301  | 5.6E-01 | 3  | 7.6  |
| P10606 | Cytochrome c oxidase subunit 5B, mitochondrial                              | 1.09 | 0.708  | 6.4E-01 | 5  | 30.2 |
| Q15029 | 116 kDa U5 small nuclear ribonucleoprotein component                        | 1.08 | NA     | NA      | 2  | 2.6  |
| Q95716 | Ras-related protein Rab-3D                                                  | 1.08 | NA     | NA      | 2  | 10.5 |
| O60493 | Sorting nexin-3                                                             | 1.08 | NA     | NA      | 2  | 11.7 |
| Q15942 | Zyxin                                                                       | 1.08 | 1.643  | 8.3E-01 | 3  | 8.7  |
| Q27J81 | Inverted formin-2                                                           | 1.07 | NA     | NA      | 2  | 1.8  |
| Q16795 | NADH dehydrogenase [ubiquinone] 1 alpha subcomplex subunit 9, mitochondrial | 1.07 | 0.929  | 7.9E-01 | 4  | 12.7 |
| P52272 | Heterogeneous nuclear ribonucleoprotein M                                   | 1.07 | 0.645  | 5.6E-01 | 7  | 11.6 |
| Q01844 | RNA-binding protein EWS                                                     | 1.07 | NA     | NA      | 2  | 2.3  |
| Q9Y3U8 | 60S ribosomal protein L36                                                   | 1.07 | 0.488  | 7.3E-01 | 5  | 36.2 |
| P55084 | Trifunctional enzyme subunit beta, mitochondrial                            | 1.07 | 0.342  | 5.1E-01 | 11 | 26.8 |
| Q9Y394 | Dehydrogenase/reductase SDR family member 7                                 | 1.07 | 0.192  | 5.8E-01 | 3  | 11.5 |
| Q13200 | 26S proteasome non-ATPase regulatory subunit 2                              | 1.07 | 0.663  | 6.4E-01 | 4  | 5.2  |
| P62269 | 40S ribosomal protein S18                                                   | 1.06 | 0.251  | 7.3E-01 | 7  | 39.5 |
| Q96QK1 | Vacuolar protein sorting-associated protein 35                              | 1.06 | NA     | NA      | 2  | 3.0  |
| Q14980 | Nuclear mitotic apparatus protein 1                                         | 1.06 | 0.741  | 4.4E-01 | 9  | 6.1  |
| P15311 | Ezrin                                                                       | 1.06 | 0.100  | 5.7E-01 | 4  | 7.2  |
| P55884 | Eukaryotic translation initiation factor 3 subunit B                        | 1.05 | 0.193  | 6.3E-01 | 6  | 9.8  |
| P26599 | Polypyrimidine tract-binding protein 1                                      | 1.05 | 0.232  | 8.1E-01 | 4  | 8.1  |
| P17844 | Probable ATP-dependent RNA helicase DDX5                                    | 1.05 | NA     | NA      | 2  | 3.3  |
| P61026 | Ras-related protein Rab-10                                                  | 1.05 | NA     | NA      | 2  | 9.5  |
| P62277 | 40S ribosomal protein S13                                                   | 1.04 | 0.613  | 7.8E-01 | 5  | 29.1 |
| Q9Y265 | RuvB-like 1                                                                 | 1.04 | Inf    | 7.0E-01 | 3  | 9.4  |
| Q15233 | Non-POU domain-containing octamer-binding protein                           | 1.04 | 0.081  | 4.5E-01 | 3  | 8.1  |
| Q9NTK5 | Obg-like ATPase 1                                                           | 1.04 | NA     | NA      | 2  | 8.3  |
| O43390 | Heterogeneous nuclear ribonucleoprotein R                                   | 1.04 | 0.155  | 7.0E-01 | 9  | 15.3 |
| Q86V81 | THO complex subunit 4                                                       | 1.04 | NA     | NA      | 2  | 8.2  |
| Q9Y230 | RuvB-like 2                                                                 | 1.04 | NA     | NA      | 2  | 6.3  |
| Q9P0L0 | Vesicle-associated membrane protein-associated protein A                    | 1.04 | 0.448  | 8.4E-01 | 3  | 15.7 |
| P61457 | Pterin-4-alpha-carbinolamine dehydratase                                    | 1.04 | 9.656  | 9.2E-01 | 3  | 29.8 |
| Q13561 | Dynactin subunit 2                                                          | 1.03 | 0.175  | 7.9E-01 | 4  | 11.5 |
| P49327 | Fatty acid synthase                                                         | 1.03 | 0.507  | 9.1E-01 | 6  | 3.2  |
| P31930 | Cytochrome b-c1 complex subunit 1, mitochondrial                            | 1.02 | 17.063 | 8.3E-01 | 6  | 17.9 |
| Q14344 | Guanine nucleotide-binding protein subunit alpha-13                         | 1.02 | 2.807  | 9.7E-01 | 3  | 8.8  |
| Q92841 | Probable ATP-dependent RNA helicase DDX17                                   | 1.02 | 0.654  | 9.6E-01 | 4  | 7.4  |
| O14745 | Na(+)/H(+) exchange regulatory cofactor NHE-RF1                             | 1.02 | NA     | NA      | 2  | 8.7  |
| P29966 | Myristoylated alanine-rich C-kinase substrate                               | 1.01 | 0.764  | 9.7E-01 | 5  | 26.5 |
| Q07666 | KH domain-containing, RNA-binding, signal transduction-associated protein 1 | 1.01 | 0.346  | 9.0E-01 | 4  | 7.9  |
| P27824 | Calnexin                                                                    | 1.01 | 2.235  | 9.5E-01 | 7  | 16.0 |
| P20645 | Cation-dependent mannose-6-phosphate receptor                               | 1.01 | 0.357  | 9.9E-01 | 3  | 15.5 |
| Q9BS26 | Endoplasmic reticulum resident protein 44                                   | 1.01 | 2.149  | 9.6E-01 | 5  | 10.6 |
| Q99805 | Transmembrane 9 superfamily member 2                                        | 1.00 | NA     | NA      | 2  | 3.5  |
| Q9UHD8 | Septin-9                                                                    | 1.00 | 0.433  | 9.8E-01 | 4  | 8.9  |
| P62318 | Small nuclear ribonucleoprotein Sm D3                                       | 1.00 | 3.560  | 9.9E-01 | 3  | 31.7 |
| P22695 | Cytochrome b-c1 complex subunit 2, mitochondrial                            | 1.00 | 0.278  | 9.9E-01 | 4  | 11.5 |
| P27144 | Adenylate kinase 4, mitochondrial                                           | 1.00 | NA     | NA      | 2  | 9.9  |
| P46937 | Yorkie homolog                                                              | 1.00 | NA     | NA      | 2  | 5.8  |
| Q96JB5 | CDK5 regulatory subunit-associated protein 3                                | 1.00 | NA     | NA      | 2  | 3.0  |
| Q7Z7H5 | Transmembrane emp24 domain-containing protein 4                             | 0.99 | NA     | NA      | 2  | 10.1 |
| P18859 | ATP synthase-coupling factor 6, mitochondrial                               | 0.99 | 1.066  | 9.8E-01 | 3  | 32.4 |
| O60664 | Perilipin-3                                                                 | 0.99 | NA     | NA      | 2  | 7.4  |
| P50213 | Isocitrate dehydrogenase [NAD] subunit alpha, mitochondrial                 | 0.99 | NA     | NA      | 2  | 6.8  |
| Q9UNH7 | Sorting nexin-6                                                             | 0.99 | NA     | NA      | 2  | 3.2  |
| P55209 | Nucleosome assembly protein 1-like 1                                        | 0.99 | 0.377  | 9.4E-01 | 3  | 12.0 |
| Q99829 | Copine-1                                                                    | 0.99 | NA     | NA      | 2  | 4.7  |
| Q06830 | Peroxisomal protein 1                                                       | 0.99 | Inf    | 8.5E-01 | 7  | 43.2 |
| Q99584 | Protein S100-A13                                                            | 0.98 | 0.846  | 9.1E-01 | 4  | 41.8 |
| Q6P587 | Acylpyruvase FAHD1, mitochondrial                                           | 0.98 | NA     | NA      | 2  | 9.8  |
| P11940 | Polyadenylate-binding protein 1                                             | 0.98 | 0.256  | 8.6E-01 | 8  | 13.8 |
| P59998 | Actin-related protein 2/3 complex subunit 4                                 | 0.98 | 0.299  | 8.8E-01 | 3  | 16.1 |
| P09496 | Clastrin light chain A                                                      | 0.98 | NA     | NA      | 2  | 5.6  |
| P49257 | Protein ERGIC-53                                                            | 0.97 | 2.201  | 7.7E-01 | 6  | 16.3 |
| Q15008 | 26S proteasome non-ATPase regulatory subunit 6                              | 0.96 | NA     | NA      | 2  | 5.9  |
| P30050 | 60S ribosomal protein L12                                                   | 0.95 | 3.224  | 8.2E-01 | 6  | 54.5 |
| P55072 | Transitional endoplasmic reticulum ATPase                                   | 0.95 | 0.259  | 5.5E-01 | 15 | 20.5 |
| P14927 | Cytochrome b-c1 complex subunit 7                                           | 0.95 | 0.217  | 6.1E-01 | 3  | 25.2 |
| Q7L5N1 | COP9 signalosome complex subunit 6                                          | 0.94 | NA     | NA      | 2  | 8.0  |
| P40939 | Trifunctional enzyme subunit alpha, mitochondrial                           | 0.94 | 0.651  | 5.8E-01 | 15 | 25.6 |

Table S6-Sample UM13

|         |                                                                               |      |        |         |    |      |
|---------|-------------------------------------------------------------------------------|------|--------|---------|----|------|
| P62979  | Ubiquitin-40S ribosomal protein S27a                                          | 0.94 | 0.365  | 5.6E-01 | 9  | 50.0 |
| P05023  | Sodium/potassium-transporting ATPase subunit alpha-1                          | 0.94 | 0.149  | 4.2E-01 | 14 | 16.4 |
| P37837  | Transaldolase                                                                 | 0.93 | 0.356  | 8.0E-01 | 3  | 7.4  |
| O75643  | U5 small nuclear ribonucleoprotein 200 kDa helicase                           | 0.93 | 0.523  | 8.0E-01 | 5  | 2.3  |
| Q15365  | Poly(rC)-binding protein 1                                                    | 0.93 | 0.329  | 6.2E-01 | 5  | 19.4 |
| Q15631  | Translin                                                                      | 0.92 | NA     | NA      | 2  | 7.5  |
| P45954  | Short/branched chain specific acyl-CoA dehydrogenase, mitochondrial           | 0.92 | 1.673  | 8.6E-01 | 3  | 7.6  |
| P11021  | 78 kDa glucose-regulated protein                                              | 0.92 | 0.135  | 2.8E-01 | 23 | 35.2 |
| P61158  | Actin-related protein 3                                                       | 0.92 | 0.262  | 6.2E-01 | 3  | 11.7 |
| O60841  | Eukaryotic translation initiation factor 5B                                   | 0.92 | NA     | NA      | 2  | 1.6  |
| Q9JUGP8 | Translocation protein SEC63 homolog                                           | 0.91 | 1.470  | 7.4E-01 | 3  | 5.4  |
| P04843  | Dolichyl-diphosphooligosaccharide--protein glycosyltransferase subunit 1      | 0.91 | 0.119  | 2.6E-01 | 13 | 26.2 |
| Q9UIJ7  | GTP-AMP phosphotransferase AK3, mitochondrial                                 | 0.91 | NA     | NA      | 2  | 11.0 |
| P50991  | T-complex protein 1 subunit delta                                             | 0.90 | 0.288  | 5.6E-01 | 4  | 9.3  |
| P00918  | Carbonic anhydrase 2                                                          | 0.90 | NA     | NA      | 2  | 10.8 |
| P26196  | Probable ATP-dependent RNA helicase DDX6                                      | 0.90 | NA     | NA      | 2  | 4.1  |
| Q99832  | T-complex protein 1 subunit eta                                               | 0.90 | 0.965  | 6.7E-01 | 4  | 9.2  |
| P01857  | Ig gamma-1 chain C region                                                     | 0.90 | 0.195  | 1.3E-01 | 6  | 31.5 |
| Q92542  | Nicastrin                                                                     | 0.90 | NA     | NA      | 2  | 2.7  |
| O60645  | Exocyst complex component 3                                                   | 0.90 | NA     | NA      | 2  | 3.6  |
| P48643  | T-complex protein 1 subunit epsilon                                           | 0.90 | 0.122  | 7.0E-02 | 6  | 9.6  |
| P62316  | Small nuclear ribonucleoprotein Sm D2                                         | 0.90 | NA     | NA      | 2  | 23.7 |
| Q16563  | Synaptophysin-like protein 1                                                  | 0.89 | NA     | NA      | 2  | 10.0 |
| P53396  | ATP-citrate synthase                                                          | 0.89 | 1.608  | 5.6E-01 | 3  | 2.9  |
| P0CG05  | Ig lambda-2 chain C regions                                                   | 0.89 | 0.123  | 2.5E-01 | 4  | 55.7 |
| Q8N1G4  | Leucine-rich repeat-containing protein 47                                     | 0.88 | NA     | NA      | 2  | 5.5  |
| P50990  | T-complex protein 1 subunit theta                                             | 0.88 | 0.094  | 1.9E-01 | 9  | 16.8 |
| Q9H4M9  | EH domain-containing protein 1                                                | 0.88 | 0.165  | 3.0E-01 | 3  | 7.5  |
| P39656  | Dolichyl-diphosphooligosaccharide--protein glycosyltransferase 48 kDa subunit | 0.88 | 0.069  | 1.1E-01 | 4  | 8.8  |
| Q01518  | Adenylyl cyclase-associated protein 1                                         | 0.87 | NA     | NA      | 2  | 5.1  |
| Q9UBI6  | Guanine nucleotide-binding protein G(I)/G(S)/G(O) subunit gamma-12            | 0.87 | 0.831  | 5.3E-01 | 4  | 45.8 |
| O00303  | Eukaryotic translation initiation factor 3 subunit F                          | 0.87 | NA     | NA      | 2  | 8.1  |
| O00231  | 26S proteasome non-ATPase regulatory subunit 11                               | 0.87 | 0.341  | 6.1E-01 | 4  | 10.7 |
| P46940  | Ras GTPase-activating-like protein IQGAP1                                     | 0.87 | 0.307  | 2.6E-01 | 7  | 5.0  |
| P49368  | T-complex protein 1 subunit gamma                                             | 0.87 | 0.120  | 1.3E-01 | 9  | 18.7 |
| P24539  | ATP synthase F(0) complex subunit B1, mitochondrial                           | 0.86 | NA     | NA      | 2  | 9.0  |
| O60716  | Catenin delta-1                                                               | 0.86 | 0.423  | 6.6E-01 | 3  | 3.3  |
| P07237  | Protein disulfide-isomerase                                                   | 0.85 | 0.885  | 2.8E-01 | 13 | 24.6 |
| Q8NBQ5  | Estradiol 17-beta-dehydrogenase 11                                            | 0.85 | NA     | NA      | 2  | 8.7  |
| P46459  | Vesicle-fusing ATPase                                                         | 0.85 | NA     | NA      | 2  | 3.1  |
| P63000  | Ras-related C3 botulinum toxin substrate 1                                    | 0.85 | 0.314  | 3.8E-01 | 4  | 24.5 |
| P17655  | Calpain-2 catalytic subunit                                                   | 0.85 | NA     | NA      | 2  | 4.3  |
| P23634  | Plasma membrane calcium-transporting ATPase 4                                 | 0.84 | 0.311  | 1.9E-01 | 3  | 4.2  |
| P30519  | Heme oxygenase 2                                                              | 0.84 | NA     | NA      | 2  | 9.8  |
| P20674  | Cytochrome c oxidase subunit 5A, mitochondrial                                | 0.84 | 0.107  | 3.2E-01 | 4  | 24.7 |
| P17568  | NADH dehydrogenase [ubiquinone] 1 beta subcomplex subunit 7                   | 0.84 | NA     | NA      | 2  | 18.2 |
| O75955  | Flotillin-1                                                                   | 0.84 | NA     | NA      | 2  | 5.9  |
| P84103  | Serine/arginine-rich splicing factor 3                                        | 0.83 | NA     | NA      | 2  | 15.9 |
| Q14203  | Dynactin subunit 1                                                            | 0.83 | 0.115  | 2.5E-01 | 3  | 4.2  |
| O43707  | Alpha-actinin-4                                                               | 0.82 | 0.079  | 1.7E-03 | 16 | 21.5 |
| P04179  | Superoxide dismutase [Mn], mitochondrial                                      | 0.82 | 0.295  | 2.7E-01 | 9  | 41.9 |
| P57053  | Histone H2B type F-S                                                          | 0.81 | NA     | NA      | 2  | 7.9  |
| Q13283  | Ras GTPase-activating protein-binding protein 1                               | 0.81 | NA     | NA      | 2  | 7.3  |
| Q00577  | Transcriptional activator protein Pur-alpha                                   | 0.81 | 1.217  | 5.5E-01 | 3  | 13.0 |
| P27797  | Calreticulin                                                                  | 0.81 | 0.326  | 2.8E-01 | 9  | 26.6 |
| P01859  | Ig gamma-2 chain C region                                                     | 0.80 | 0.103  | 3.0E-01 | 3  | 12.0 |
| P49748  | Very long-chain specific acyl-CoA dehydrogenase, mitochondrial                | 0.80 | 0.206  | 1.2E-01 | 6  | 8.5  |
| P61764  | Syntaxin-binding protein 1                                                    | 0.80 | 0.068  | 8.1E-02 | 3  | 6.4  |
| P00367  | Glutamate dehydrogenase 1, mitochondrial                                      | 0.80 | 0.408  | 2.3E-01 | 7  | 15.2 |
| Q6LUVK1 | Chondroitin sulfate proteoglycan 4                                            | 0.79 | NA     | NA      | 2  | 1.5  |
| P49591  | Serine--tRNA ligase, cytoplasmic                                              | 0.79 | 1.683  | 6.2E-01 | 3  | 6.8  |
| P07602  | Prosaposin                                                                    | 0.79 | 52.784 | 5.6E-01 | 5  | 7.1  |
| P62805  | Histone H4                                                                    | 0.79 | 0.184  | 4.6E-03 | 8  | 52.4 |
| Q15084  | Protein disulfide-isomerase A6                                                | 0.78 | 0.208  | 1.2E-01 | 7  | 19.8 |
| Q14258  | E3 ubiquitin/ISG15 ligase TRIM25                                              | 0.78 | NA     | NA      | 2  | 3.8  |
| Q02218  | 2-oxoglutarate dehydrogenase, mitochondrial                                   | 0.78 | 0.168  | 1.0E-01 | 8  | 10.1 |
| Q15717  | ELAV-like protein 1                                                           | 0.78 | NA     | NA      | 2  | 8.3  |
| P01876  | Ig alpha-1 chain C region                                                     | 0.78 | 0.234  | 2.2E-01 | 3  | 10.5 |
| P01834  | Ig kappa chain C region                                                       | 0.78 | 0.119  | 7.5E-02 | 4  | 65.1 |
| P09012  | U1 small nuclear ribonucleoprotein A                                          | 0.77 | NA     | NA      | 2  | 9.2  |
| Q00765  | Receptor expression-enhancing protein 5                                       | 0.77 | 0.249  | 3.9E-01 | 3  | 14.3 |
| Q14204  | Cytoplasmic dynein 1 heavy chain 1                                            | 0.77 | 0.056  | 4.6E-06 | 39 | 9.7  |
| Q14254  | Flotillin-2                                                                   | 0.77 | 0.131  | 8.8E-02 | 5  | 12.9 |
| Q71DI3  | Histone H3.2                                                                  | 0.77 | 0.121  | 5.2E-02 | 5  | 25.7 |
| Q9Y6N5  | Sulfide:quinone oxidoreductase, mitochondrial                                 | 0.77 | NA     | NA      | 2  | 7.6  |
| P51116  | Fragile X mental retardation syndrome-related protein 2                       | 0.75 | NA     | NA      | 2  | 4.0  |
| Q05682  | Caldesmon                                                                     | 0.75 | 0.394  | 2.9E-01 | 7  | 13.2 |
| Q14108  | Lysosome membrane protein 2                                                   | 0.75 | 0.084  | 5.6E-02 | 3  | 8.4  |
| P62244  | 40S ribosomal protein S15a                                                    | 0.75 | 2.696  | 4.7E-01 | 4  | 30.8 |
| Q8IX12  | Cell division cycle and apoptosis regulator protein 1                         | 0.75 | NA     | NA      | 2  | 2.3  |
| P29692  | Elongation factor 1-delta                                                     | 0.75 | 0.812  | 3.7E-01 | 3  | 13.5 |
| P31942  | Heterogeneous nuclear ribonucleoprotein H3                                    | 0.74 | NA     | NA      | 2  | 11.0 |
| P46063  | ATP-dependent DNA helicase Q1                                                 | 0.74 | NA     | NA      | 2  | 3.9  |
| P13987  | CD59 glycoprotein                                                             | 0.74 | 0.116  | 1.8E-01 | 3  | 23.4 |
| Q12797  | Aspartyl/asparaginyl beta-hydroxylase                                         | 0.74 | 0.119  | 5.2E-02 | 4  | 6.2  |
| P43307  | Translocon-associated protein subunit alpha                                   | 0.74 | 0.136  | 3.0E-01 | 3  | 11.9 |
| P35241  | Radixin                                                                       | 0.74 | NA     | NA      | 2  | 3.9  |
| P43490  | Nicotinamide phosphoribosyltransferase                                        | 0.74 | 7.356  | 7.8E-01 | 3  | 7.9  |
| P04632  | Calpain small subunit 1                                                       | 0.74 | 0.182  | 1.5E-01 | 5  | 16.0 |
| P08134  | Rho-related GTP-binding protein RhoC                                          | 0.74 | 0.091  | 7.0E-02 | 4  | 21.8 |
| O75746  | Calcium-binding mitochondrial carrier protein Aralar1                         | 0.73 | 0.152  | 1.4E-01 | 4  | 8.1  |
| P50995  | Annexin A11                                                                   | 0.73 | 0.288  | 2.4E-01 | 4  | 9.3  |
| P49458  | Signal recognition particle 9 kDa protein                                     | 0.73 | NA     | NA      | 2  | 25.6 |
| Q53GQ0  | Estradiol 17-beta-dehydrogenase 12                                            | 0.73 | 0.287  | 1.6E-01 | 5  | 20.8 |
| P60953  | Cell division control protein 42 homolog                                      | 0.73 | 0.110  | 1.1E-01 | 4  | 22.0 |
| P0C0S5  | Histone H2A.Z                                                                 | 0.73 | NA     | NA      | 2  | 18.8 |
| O75915  | PRA1 family protein 3                                                         | 0.72 | 0.301  | 5.9E-01 | 3  | 19.7 |
| Q16891  | Mitochondrial inner membrane protein                                          | 0.72 | 0.355  | 1.8E-01 | 8  | 13.6 |
| Q12965  | Unconventional myosin-le                                                      | 0.71 | 0.174  | 2.3E-01 | 3  | 2.5  |
| P13667  | Protein disulfide-isomerase A4                                                | 0.71 | 0.111  | 3.7E-02 | 5  | 9.3  |
| P30101  | Protein disulfide-isomerase A3                                                | 0.71 | 0.131  | 1.1E-03 | 16 | 31.3 |
| P14625  | Endoplasmic                                                                   | 0.70 | 0.057  | 1.9E-06 | 14 | 21.2 |
| Q07065  | Cytoskeleton-associated protein 4                                             | 0.70 | 0.115  | 2.3E-02 | 6  | 13.5 |
| P01024  | Complement C3                                                                 | 0.70 | 0.197  | 1.6E-01 | 15 | 11.6 |
| P50454  | Serpin H1                                                                     | 0.70 | 1.634  | 5.3E-01 | 5  | 15.8 |
| P13473  | Lysosome-associated membrane glycoprotein 2                                   | 0.69 | NA     | NA      | 2  | 4.9  |
| P01009  | Alpha-1-antitrypsin                                                           | 0.69 | 0.121  | 8.7E-03 | 10 | 26.3 |
| P17987  | T-complex protein 1 subunit alpha                                             | 0.69 | 0.128  | 6.5E-02 | 5  | 9.7  |
| P04844  | Dolichyl-diphosphooligosaccharide--protein glycosyltransferase subunit 2      | 0.69 | 0.120  | 1.2E-01 | 3  | 5.4  |
| Q43681  | ATPase ASNA1                                                                  | 0.68 | NA     | NA      | 2  | 8.0  |
| P35222  | Catenin beta-1                                                                | 0.68 | NA     | NA      | 2  | 4.0  |
| P47756  | F-actin-capping protein subunit beta                                          | 0.68 | NA     | NA      | 2  | 8.7  |
| P61163  | Alpha-centractin                                                              | 0.67 | NA     | NA      | 2  | 9.8  |
| Q15019  | Septin-2                                                                      | 0.67 | 0.097  | 3.6E-02 | 7  | 29.9 |
| P02774  | Vitamin D-binding protein                                                     | 0.67 | 0.032  | 1.9E-03 | 3  | 6.5  |

Table S6-Sample UM13

|        |                                                                   |      |       |         |    |      |
|--------|-------------------------------------------------------------------|------|-------|---------|----|------|
| Q03252 | Lamin-B2                                                          | 0.67 | 0.058 | 6.4E-06 | 15 | 26.0 |
| P12235 | ADP/ATP translocase 1                                             | 0.67 | 0.085 | 1.9E-02 | 4  | 14.1 |
| Q6NUK1 | Calcium-binding mitochondrial carrier protein SCaMC-1             | 0.66 | NA    | NA      | 2  | 3.4  |
| P07305 | Histone H1.0                                                      | 0.66 | 0.262 | 3.0E-01 | 3  | 16.0 |
| Q08722 | Leukocyte surface antigen CD47                                    | 0.66 | NA    | NA      | 2  | 5.9  |
| P13073 | Cytochrome c oxidase subunit 4 isoform 1, mitochondrial           | 0.66 | NA    | NA      | 2  | 12.4 |
| Q14683 | Structural maintenance of chromosomes protein 1A                  | 0.66 | 1.794 | 5.4E-01 | 3  | 2.8  |
| P55060 | Exportin-2                                                        | 0.66 | NA    | NA      | 2  | 2.3  |
| Q71U36 | Tubulin alpha-1A chain                                            | 0.65 | 0.066 | 2.1E-04 | 5  | 16.0 |
| O00264 | Membrane-associated progesterone receptor component 1             | 0.65 | 0.226 | 7.5E-02 | 3  | 15.9 |
| P16435 | NADPH-cytochrome P450 reductase                                   | 0.64 | NA    | NA      | 2  | 2.5  |
| Q92499 | ATP-dependent RNA helicase DDX1                                   | 0.64 | 0.144 | 8.2E-02 | 3  | 4.3  |
| P02647 | Apolipoprotein A-I                                                | 0.63 | 0.085 | 1.4E-05 | 11 | 44.6 |
| O14773 | Tripeptidyl-peptidase 1                                           | 0.63 | 0.070 | 2.8E-02 | 4  | 8.7  |
| P42025 | Beta-centractin                                                   | 0.61 | NA    | NA      | 2  | 10.1 |
| Q7L576 | Cytoplasmic FMR1-interacting protein 1                            | 0.61 | NA    | NA      | 2  | 2.0  |
| P07437 | Tubulin beta chain                                                | 0.61 | 0.097 | 9.8E-03 | 3  | 9.9  |
| Q15149 | Plectin                                                           | 0.60 | 0.053 | 6.6E-07 | 43 | 11.0 |
| P51812 | Ribosomal protein S6 kinase alpha-3                               | 0.59 | 0.130 | 1.2E-01 | 3  | 4.3  |
| O75369 | Filamin-B                                                         | 0.59 | 0.135 | 1.7E-02 | 4  | 2.9  |
| P07384 | Calpain-1 catalytic subunit                                       | 0.59 | 0.157 | 7.4E-02 | 4  | 7.0  |
| Q04637 | Eukaryotic translation initiation factor 4 gamma 1                | 0.58 | NA    | NA      | 2  | 1.0  |
| P23284 | Peptidyl-prolyl cis-trans isomerase B                             | 0.58 | 0.092 | 1.3E-02 | 9  | 34.3 |
| O00159 | Unconventional myosin-1c                                          | 0.58 | 0.096 | 1.9E-02 | 16 | 17.9 |
| Q9UHG3 | Prenylcysteine oxidase 1                                          | 0.58 | 0.180 | 1.2E-01 | 5  | 10.5 |
| P21964 | Catechol O-methyltransferase                                      | 0.58 | 0.088 | 2.3E-01 | 3  | 14.8 |
| P02652 | Apolipoprotein A-II                                               | 0.58 | NA    | NA      | 2  | 17.0 |
| P29590 | Protein PML                                                       | 0.57 | NA    | NA      | 2  | 2.7  |
| Q9BSJ8 | Extended synaptotagmin-1                                          | 0.57 | 0.289 | 1.4E-01 | 4  | 4.4  |
| P13861 | cAMP-dependent protein kinase type II-alpha regulatory subunit    | 0.57 | 0.020 | 1.8E-02 | 3  | 10.9 |
| P09543 | 2',3'-cyclic-nucleotide 3'-phosphodiesterase                      | 0.57 | 0.500 | 2.7E-01 | 5  | 11.4 |
| P60709 | Actin, cytoplasmic 1                                              | 0.56 | 0.043 | 3.4E-08 | 7  | 30.9 |
| Q92522 | Histone H1x                                                       | 0.56 | 0.245 | 6.4E-02 | 3  | 16.9 |
| P07339 | Cathepsin D                                                       | 0.56 | 0.053 | 1.4E-02 | 4  | 11.4 |
| Q9HDC9 | Adipocyte plasma membrane-associated protein                      | 0.56 | NA    | NA      | 2  | 5.0  |
| P35580 | Myosin-10                                                         | 0.56 | 0.111 | 1.6E-04 | 13 | 9.9  |
| Q16181 | Septin-7                                                          | 0.54 | 0.092 | 5.0E-03 | 3  | 8.7  |
| Q00610 | Clathrin heavy chain 1                                            | 0.54 | 0.058 | 1.8E-08 | 24 | 18.6 |
| Q9NQC3 | Reticulon-4                                                       | 0.53 | 0.091 | 9.5E-04 | 3  | 5.1  |
| P47755 | F-actin-capping protein subunit alpha-2                           | 0.52 | NA    | NA      | 2  | 13.3 |
| P67936 | Tropomyosin alpha-4 chain                                         | 0.51 | 0.161 | 5.1E-03 | 7  | 22.2 |
| P00738 | Haptoglobin                                                       | 0.51 | 0.094 | 3.2E-03 | 7  | 19.0 |
| P06727 | Apolipoprotein A-IV                                               | 0.51 | 0.142 | 1.2E-02 | 11 | 29.0 |
| P12814 | Alpha-actinin-1                                                   | 0.50 | 0.052 | 4.8E-07 | 14 | 21.3 |
| Q9Y490 | Talin-1                                                           | 0.50 | 0.056 | 6.3E-09 | 23 | 12.0 |
| O94905 | Erlin-2                                                           | 0.50 | 0.167 | 5.4E-02 | 4  | 10.0 |
| P06899 | Histone H2B type 1-J                                              | 0.48 | NA    | NA      | 2  | 7.9  |
| Q10567 | AP-1 complex subunit beta-1                                       | 0.48 | 0.248 | 9.4E-02 | 3  | 3.8  |
| P41219 | Peripherin                                                        | 0.47 | 0.341 | 6.9E-02 | 7  | 16.2 |
| O43865 | Putative adenosylhomocysteinase 2                                 | 0.47 | NA    | NA      | 2  | 3.6  |
| P16615 | Sarcoplasmic/endoplasmic reticulum calcium ATPase 2               | 0.46 | 0.056 | 2.6E-04 | 5  | 5.9  |
| P46821 | Microtubule-associated protein 1B                                 | 0.46 | NA    | NA      | 2  | 1.0  |
| P06396 | Gelsolin                                                          | 0.46 | 0.067 | 6.1E-07 | 12 | 19.7 |
| O14950 | Myosin regulatory light chain 12B                                 | 0.45 | NA    | NA      | 2  | 12.2 |
| Q43301 | Heat shock 70 kDa protein 12A                                     | 0.44 | 0.037 | 4.9E-05 | 4  | 6.7  |
| Q92973 | Transportin-1                                                     | 0.44 | 0.516 | 1.9E-01 | 4  | 5.8  |
| Q93050 | V-type proton ATPase 116 kDa subunit a isoform 1                  | 0.44 | NA    | NA      | 2  | 2.7  |
| Q09666 | Neuroblast differentiation-associated protein AHNAK               | 0.44 | 0.035 | 1.5E-12 | 67 | 9.6  |
| P04217 | Alpha-1B-glycoprotein                                             | 0.43 | 0.173 | 1.8E-01 | 3  | 9.3  |
| P01042 | Kininogen-1                                                       | 0.43 | NA    | NA      | 2  | 4.2  |
| P18206 | Vinculin                                                          | 0.43 | 0.077 | 1.2E-04 | 11 | 11.4 |
| P32119 | Peroxisome oxidase 2                                              | 0.43 | 0.110 | 4.0E-04 | 4  | 18.2 |
| P00387 | NADH-cytochrome b5 reductase 3                                    | 0.42 | 0.106 | 1.3E-02 | 5  | 23.3 |
| Q6DD88 | Atlastin-3                                                        | 0.41 | NA    | NA      | 2  | 3.5  |
| P08294 | Extracellular superoxide dismutase [Cu-Zn]                        | 0.40 | NA    | NA      | 2  | 12.1 |
| Q6NZI2 | Polymerase I and transcript release factor                        | 0.40 | 0.107 | 1.5E-03 | 6  | 22.6 |
| Q7Z406 | Myosin-14                                                         | 0.39 | 0.095 | 1.5E-05 | 4  | 2.4  |
| Q9NZN4 | EH domain-containing protein 2                                    | 0.38 | NA    | NA      | 2  | 5.2  |
| P05556 | Integrin beta-1                                                   | 0.38 | 0.085 | 1.1E-05 | 6  | 8.9  |
| Q14764 | Major vault protein                                               | 0.38 | NA    | NA      | 2  | 2.8  |
| Q03135 | Caveolin-1                                                        | 0.38 | NA    | NA      | 2  | 13.5 |
| P17612 | cAMP-dependent protein kinase catalytic subunit alpha             | 0.38 | NA    | NA      | 2  | 4.3  |
| P43121 | Cell surface glycoprotein MUC18                                   | 0.35 | NA    | NA      | 2  | 2.6  |
| P11413 | Glucose-6-phosphate 1-dehydrogenase                               | 0.33 | NA    | NA      | 2  | 4.9  |
| P05362 | Intercellular adhesion molecule 1                                 | 0.32 | NA    | NA      | 2  | 4.5  |
| Q43175 | D-3-phosphoglycerate dehydrogenase                                | 0.31 | NA    | NA      | 2  | 5.1  |
| P17661 | Desmin                                                            | 0.31 | NA    | NA      | 2  | 4.3  |
| P14543 | Nidogen-1                                                         | 0.31 | 0.356 | 1.5E-01 | 6  | 5.8  |
| P68366 | Tubulin alpha-4A chain                                            | 0.30 | 0.498 | 1.4E-01 | 3  | 8.0  |
| Q96HC4 | PDZ and LIM domain protein 5                                      | 0.28 | NA    | NA      | 2  | 3.5  |
| Q9HBL0 | Tensin-1                                                          | 0.28 | 0.416 | 8.2E-02 | 4  | 3.4  |
| Q63ZY3 | KN motif and ankyrin repeat domain-containing protein 2           | 0.28 | NA    | NA      | 2  | 2.8  |
| Q08431 | Lactadherin                                                       | 0.27 | NA    | NA      | 2  | 7.2  |
| Q14141 | Septin-6                                                          | 0.27 | NA    | NA      | 2  | 6.9  |
| Q9LUK6 | Protein kinase C and casein kinase substrate in neurons protein 3 | 0.26 | NA    | NA      | 2  | 5.0  |
| Q9Y6C2 | EMILIN-1                                                          | 0.25 | NA    | NA      | 2  | 2.9  |
| Q16270 | Insulin-like growth factor-binding protein 7                      | 0.24 | NA    | NA      | 2  | 10.3 |
| P24844 | Myosin regulatory light polypeptide 9                             | 0.24 | NA    | NA      | 2  | 12.2 |
| P61769 | Beta-2-microglobulin                                              | 0.23 | NA    | NA      | 2  | 16.8 |
| Q13885 | Tubulin beta-2A chain                                             | 0.22 | NA    | NA      | 2  | 5.4  |
| P05026 | Sodium/potassium-transporting ATPase subunit beta-1               | 0.21 | NA    | NA      | 2  | 6.9  |
| P06756 | Integrin alpha-V                                                  | 0.21 | 0.346 | 1.3E-01 | 3  | 3.8  |
| Q14699 | Raffin                                                            | 0.20 | NA    | NA      | 2  | 4.2  |
| Q15041 | ADP-ribosylation factor-like protein 6-interacting protein 1      | 0.19 | NA    | NA      | 2  | 7.9  |
| P05186 | Alkaline phosphatase, tissue-nonspecific isozyme                  | 0.19 | NA    | NA      | 2  | 4.8  |
| P07360 | Complement component C8 gamma chain                               | 0.19 | NA    | NA      | 2  | 18.3 |
| P07196 | Neurofilament light polypeptide                                   | 0.19 | NA    | NA      | 2  | 4.2  |
| P59768 | Guanine nucleotide-binding protein G(I)/G(S)/G(O) subunit gamma-2 | 0.18 | NA    | NA      | 2  | 32.4 |
| Q13509 | Tubulin beta-3 chain                                              | 0.18 | NA    | NA      | 2  | 5.8  |
| Q05707 | Collagen alpha-1(XIV) chain                                       | 0.18 | 0.833 | 2.0E-01 | 3  | 2.3  |
| Q01995 | Transgelin                                                        | 0.17 | 0.280 | 1.2E-01 | 3  | 16.9 |
| P11277 | Spectrin beta chain, erythrocytic                                 | 0.16 | 0.239 | 2.9E-01 | 3  | 2.0  |
| P08571 | Monocyte differentiation antigen CD14                             | 0.16 | NA    | NA      | 2  | 7.5  |
| P36269 | Gamma-glutamyltransferase 5                                       | 0.15 | NA    | NA      | 2  | 3.9  |
| P02462 | Collagen alpha-1(V) chain                                         | 0.13 | 0.560 | 7.7E-02 | 3  | 2.3  |
| Q14767 | Latent-transforming growth factor beta-binding protein 2          | 0.13 | NA    | NA      | 2  | 1.6  |
| Q63HR2 | Tensin-like C1 domain-containing phosphatase                      | 0.12 | NA    | NA      | 2  | 1.4  |
| Q96CX2 | BTB/POZ domain-containing protein KCTD12                          | 0.12 | NA    | NA      | 2  | 5.5  |
| Q43491 | Band 4.1-like protein 2                                           | 0.10 | NA    | NA      | 2  | 2.7  |
| P17643 | 5,6-dihydroxyindole-2-carboxylic acid oxidase                     | 0.10 | NA    | NA      | 2  | 5.6  |
| P21926 | CD9 antigen                                                       | 0.10 | NA    | NA      | 2  | 7.5  |
| Q9BXN1 | Asporin                                                           | 0.09 | NA    | NA      | 2  | 7.4  |
| O94875 | Sorbin and SH3 domain-containing protein 2                        | 0.08 | NA    | NA      | 2  | 3.7  |
| P80723 | Brain acid soluble protein 1                                      | 0.08 | 0.099 | 8.8E-02 | 5  | 33.5 |
| P43320 | Beta-crystallin B2                                                | 0.08 | NA    | NA      | 2  | 11.7 |

Table S6-Sample UM13

|        |                                                                      |      |       |         |    |      |
|--------|----------------------------------------------------------------------|------|-------|---------|----|------|
| Q9BXM0 | Periaxin                                                             | 0.08 | NA    | NA      | 2  | 1.9  |
| P26447 | Protein S100-A4                                                      | 0.07 | NA    | NA      | 2  | 18.8 |
| P07357 | Complement component C8 alpha chain                                  | 0.03 | NA    | NA      | 2  | 7.0  |
| P22352 | Glutathione peroxidase 3                                             | 0.03 | NA    | NA      | 2  | 8.0  |
| P08123 | Collagen alpha-2(I) chain                                            | 0.02 | NA    | NA      | 2  | 2.4  |
| P09936 | Ubiquitin carboxyl-terminal hydrolase isozyme L1                     | 0.01 | NA    | NA      | 2  | 10.3 |
| P08133 | Annexin A6                                                           | 0.37 | 0.042 | 6.7E-16 | 24 | 42.9 |
| P35579 | Myosin-9                                                             | 0.35 | 0.036 | 0.0E+00 | 56 | 32.1 |
| Q16363 | Laminin subunit alpha-4                                              | 0.35 | 0.172 | 5.0E-02 | 3  | 2.4  |
| P17931 | Galectin-3                                                           | 0.35 | 0.091 | 5.0E-04 | 6  | 28.4 |
| P00167 | Cytochrome b5                                                        | 0.34 | 0.172 | 2.9E-02 | 3  | 35.8 |
| P48735 | Isocitrate dehydrogenase [NADP], mitochondrial                       | 0.34 | 0.206 | 1.4E-02 | 4  | 9.7  |
| Q9BTV4 | Transmembrane protein 43                                             | 0.34 | 0.217 | 6.6E-03 | 4  | 14.0 |
| Q01082 | Spectrin beta chain, non-erythrocytic 1                              | 0.34 | 0.044 | 0.0E+00 | 51 | 26.4 |
| Q9NZM1 | Myoferlin                                                            | 0.33 | 0.073 | 9.6E-05 | 4  | 2.4  |
| P60660 | Myosin light polypeptide 6                                           | 0.32 | 0.062 | 5.8E-11 | 7  | 58.3 |
| P50895 | Basal cell adhesion molecule                                         | 0.31 | 0.377 | 2.9E-02 | 4  | 9.4  |
| Q13813 | Spectrin alpha chain, non-erythrocytic 1                             | 0.31 | 0.033 | 0.0E+00 | 74 | 32.5 |
| P27105 | Erythrocyte band 7 integral membrane protein                         | 0.31 | 0.072 | 1.3E-03 | 5  | 18.4 |
| Q16555 | Dihydropyrimidinase-related protein 2                                | 0.30 | 0.067 | 2.4E-07 | 11 | 27.3 |
| P09382 | Galectin-1                                                           | 0.30 | 0.078 | 2.5E-07 | 5  | 43.7 |
| Q02952 | A-kinase anchor protein 12                                           | 0.30 | 0.106 | 4.3E-02 | 10 | 9.5  |
| P55268 | Laminin subunit beta-2                                               | 0.27 | 0.173 | 3.7E-03 | 11 | 8.0  |
| P02679 | Fibrinogen gamma chain                                               | 0.27 | 0.354 | 1.8E-02 | 8  | 23.6 |
| P02511 | Alpha-crystallin B chain                                             | 0.27 | 0.089 | 3.7E-03 | 5  | 29.1 |
| O00468 | Agrin                                                                | 0.25 | 0.187 | 3.0E-02 | 4  | 2.8  |
| P02675 | Fibrinogen beta chain                                                | 0.24 | 0.084 | 1.4E-06 | 8  | 22.2 |
| P07099 | Epoxide hydrolase 1                                                  | 0.22 | 0.112 | 1.3E-05 | 5  | 13.0 |
| Q14956 | Transmembrane glycoprotein NMB                                       | 0.22 | 0.320 | 2.7E-02 | 4  | 7.5  |
| P68032 | Actin, alpha cardiac muscle 1                                        | 0.22 | 0.324 | 5.5E-04 | 6  | 28.6 |
| P04196 | Histidine-rich glycoprotein                                          | 0.21 | 0.183 | 3.9E-02 | 3  | 8.0  |
| Q14112 | Nidogen-2                                                            | 0.20 | 0.194 | 2.4E-03 | 4  | 3.4  |
| P02749 | Beta-2-glycoprotein 1                                                | 0.20 | 0.079 | 2.5E-06 | 7  | 31.0 |
| P00450 | Ceruloplasmin                                                        | 0.20 | 0.116 | 1.1E-03 | 5  | 7.2  |
| P12111 | Collagen alpha-3(VI) chain                                           | 0.19 | 0.092 | 3.6E-08 | 23 | 8.4  |
| P02549 | Spectrin alpha chain, erythrocytic 1                                 | 0.19 | 0.074 | 4.6E-04 | 5  | 2.8  |
| P01903 | HLA class II histocompatibility antigen, DR alpha chain              | 0.19 | 0.192 | 2.1E-03 | 3  | 15.7 |
| P00747 | Plasminogen                                                          | 0.19 | 0.313 | 1.9E-02 | 3  | 3.6  |
| P02649 | Apolipoprotein E                                                     | 0.18 | 0.086 | 1.2E-08 | 14 | 47.9 |
| P98160 | Basement membrane-specific heparan sulfate proteoglycan core protein | 0.18 | 0.127 | 1.5E-11 | 25 | 7.8  |
| Q07954 | Prolow-density lipoprotein receptor-related protein 1                | 0.18 | 0.172 | 7.7E-03 | 4  | 1.1  |
| P11166 | Solute carrier family 2, facilitated glucose transporter member 1    | 0.17 | 0.166 | 2.3E-05 | 4  | 7.3  |
| P21333 | Filamin-A                                                            | 0.17 | 0.071 | 0.0E+00 | 37 | 19.8 |
| P12110 | Collagen alpha-2(VI) chain                                           | 0.17 | 0.128 | 7.2E-08 | 7  | 6.5  |
| P02686 | Myelin basic protein                                                 | 0.17 | 0.287 | 4.6E-02 | 3  | 10.5 |
| O15230 | Laminin subunit alpha-5                                              | 0.17 | 0.146 | 4.9E-06 | 11 | 4.5  |
| P02671 | Fibrinogen alpha chain                                               | 0.16 | 0.102 | 6.3E-04 | 9  | 12.5 |
| P60903 | Protein S100-A10                                                     | 0.16 | 0.100 | 2.3E-07 | 4  | 35.1 |
| P11047 | Laminin subunit gamma-1                                              | 0.16 | 0.218 | 1.8E-04 | 9  | 7.0  |
| P01008 | Antithrombin-III                                                     | 0.16 | 0.143 | 2.8E-02 | 3  | 6.7  |
| P12109 | Collagen alpha-1(VI) chain                                           | 0.15 | 0.143 | 1.1E-05 | 8  | 10.1 |
| P02751 | Fibronectin                                                          | 0.14 | 0.073 | 2.4E-02 | 4  | 2.4  |
| P07355 | Annexin A2                                                           | 0.14 | 0.061 | 0.0E+00 | 22 | 58.7 |
| P02654 | Apolipoprotein C-I                                                   | 0.13 | 0.058 | 1.1E-05 | 3  | 24.1 |
| P39060 | Collagen alpha-1(XVIII) chain                                        | 0.12 | 0.280 | 3.3E-04 | 8  | 5.2  |
| P01011 | Alpha-1-antichymotrypsin                                             | 0.12 | 0.078 | 6.1E-08 | 5  | 12.5 |
| P63211 | Guanine nucleotide-binding protein G(T) subunit gamma-T1             | 0.12 | 0.357 | 3.1E-02 | 3  | 20.3 |
| P04275 | von Willebrand factor                                                | 0.12 | 0.250 | 2.2E-04 | 10 | 4.5  |
| P02760 | Protein AMBP                                                         | 0.11 | 0.124 | 4.9E-06 | 3  | 12.5 |
| P23946 | Chymase                                                              | 0.11 | 0.422 | 5.0E-02 | 3  | 16.2 |
| P01871 | Ig mu chain C region                                                 | 0.10 | 0.217 | 3.8E-05 | 8  | 23.5 |
| P35625 | Metalloproteinase inhibitor 3                                        | 0.10 | 0.189 | 2.9E-08 | 6  | 27.0 |
| Q16853 | Membrane primary amine oxidase                                       | 0.09 | 0.230 | 4.0E-02 | 3  | 3.7  |
| P35749 | Myosin-11                                                            | 0.09 | 0.199 | 7.0E-07 | 23 | 14.7 |
| P02730 | Band 3 anion transport protein                                       | 0.09 | 0.189 | 1.7E-03 | 7  | 11.6 |
| P08572 | Collagen alpha-2(IV) chain                                           | 0.09 | 0.289 | 2.0E-03 | 4  | 3.0  |
| P10643 | Complement component C7                                              | 0.09 | 0.160 | 9.4E-05 | 4  | 6.3  |
| P01031 | Complement C5                                                        | 0.08 | 0.342 | 1.6E-03 | 5  | 2.9  |
| P39059 | Collagen alpha-1(XV) chain                                           | 0.08 | 0.104 | 9.6E-07 | 3  | 2.7  |
| P51888 | Prolargin                                                            | 0.08 | 0.107 | 0.0E+00 | 14 | 41.9 |
| P04083 | Annexin A1                                                           | 0.07 | 0.188 | 3.0E-05 | 12 | 40.8 |
| P20774 | Mimexan                                                              | 0.07 | 0.175 | 6.8E-05 | 7  | 22.8 |
| Q14195 | Dihydropyrimidinase-related protein 3                                | 0.07 | 0.162 | 1.3E-08 | 3  | 8.2  |
| P07585 | Decorin                                                              | 0.06 | 0.221 | 1.9E-02 | 7  | 21.2 |
| P35555 | Fibrillin-1                                                          | 0.06 | 0.108 | 2.2E-16 | 31 | 13.2 |
| P10909 | Clusterin                                                            | 0.06 | 0.093 | 0.0E+00 | 16 | 33.4 |
| P22748 | Carbonic anhydrase 4                                                 | 0.06 | 0.251 | 5.5E-04 | 3  | 10.3 |
| P02748 | Complement component C9                                              | 0.06 | 0.194 | 1.4E-07 | 11 | 21.5 |
| Q15661 | Tryptase alpha/beta-1                                                | 0.06 | 0.171 | 8.8E-06 | 4  | 17.1 |
| P04004 | Vitronectin                                                          | 0.05 | 0.158 | 2.4E-08 | 11 | 23.8 |
| P21980 | Protein-glutamine gamma-glutamyltransferase 2                        | 0.05 | 0.150 | 3.0E-08 | 14 | 22.3 |
| P02743 | Serum amyloid P-component                                            | 0.05 | 0.356 | 7.5E-04 | 5  | 22.4 |
| P51884 | Lumican                                                              | 0.04 | 0.138 | 4.5E-12 | 11 | 40.5 |
| P21810 | Biglycan                                                             | 0.04 | 0.136 | 2.7E-09 | 14 | 41.6 |
| P25189 | Myelin protein P0                                                    | 0.02 | 0.254 | 1.9E-04 | 5  | 21.8 |

Brown denotes change  $\geq 2$  standard deviations (SD) from the mean, yellow denotes change  $\geq 1$  SD and green highlights p values  $\leq 0.05$ . NA, not applicable. n<3 unique peptides.
