# Supplementary material for: iTRAQ Quantitative Proteomic Comparison of Metastatic and Non-Metastatic Uveal Melanoma Tumors
Source: PubMed Central journal article supplement (PMC4549237; doi:10.1371/journal.pone.0135543), 2015-08-25
Supplement: pone.0135543.s007.pdf [file pone.0135543.s007.pdf]

## Supplementary Table S7

## Relative Protein Abundance: Sample UM20, Non-Metastatic

Total Proteins Quantified = 803; LogMedian Protein Ratio = 0.18; LogMean ProteinRatio = 0; Standard Deviation = 0.78

| Uni-Prot Accession | Protein                                                         | Ratio UM/Control | Standard Deviation | p value | Unique Peptides | % Sequence Coverage |
|--------------------|-----------------------------------------------------------------|------------------|--------------------|---------|-----------------|---------------------|
| P16402             | Histone H1.3                                                    | 6.53             | 0.124              | 2.8E-09 | 4               | 10.4                |
| P16401             | Histone H1.5                                                    | 6.41             | 0.137              | 1.3E-05 | 7               | 15.9                |
| P62937             | Peptidyl-prolyl cis-trans isomerase A                           | 5.64             | 0.117              | 2.9E-11 | 7               | 38.2                |
| Q9BV36             | Melanophilin                                                    | 5.32             | 0.217              | 4.3E-03 | 5               | 11.7                |
| P08670             | Vimentin                                                        | 5.28             | 0.031              | 0.0E+00 | 38              | 68.7                |
| O15400             | Syntaxin-7                                                      | 5.18             | 0.074              | 2.0E-04 | 3               | 11.5                |
| P29401             | Transketolase                                                   | 4.55             | 0.162              | 2.1E-06 | 13              | 19.9                |
| P30086             | Phosphatidylethanolamine-binding protein 1                      | 4.18             | 0.122              | 3.7E-05 | 7               | 42.8                |
| P04406             | Glyceraldehyde-3-phosphate dehydrogenase                        | 4.08             | 0.085              | 2.4E-12 | 12              | 40.3                |
| P00558             | Phosphoglycerate kinase 1                                       | 4.07             | 0.089              | 3.8E-07 | 8               | 16.3                |
| P22087             | rRNA 2'-O-methyltransferase fibrillar                           | 3.93             | 0.222              | 4.1E-03 | 4               | 13.1                |
| P78417             | Glutathione S-transferase omega-1                               | 3.66             | 0.155              | 3.0E-05 | 7               | 21.2                |
| P04080             | Cystatin-B                                                      | 3.63             | 0.121              | 2.5E-04 | 3               | 39.8                |
| P30837             | Aldehyde dehydrogenase X, mitochondrial                         | 3.53             | 0.121              | 4.6E-04 | 5               | 14.1                |
| P17931             | Galectin-3                                                      | 3.52             | 0.096              | 3.4E-09 | 7               | 31.2                |
| P06733             | Alpha-enolase                                                   | 3.48             | 0.080              | 1.1E-08 | 11              | 34.3                |
| Q13510             | Acid ceramidase                                                 | 3.44             | 0.125              | 8.3E-05 | 4               | 10.6                |
| P00338             | L-lactate dehydrogenase A chain                                 | 3.39             | 0.109              | 4.6E-04 | 5               | 13.3                |
| Q6UVK1             | Chondroitin sulfate proteoglycan 4                              | 3.39             | 0.142              | 3.2E-05 | 10              | 6.6                 |
| P51608             | Methyl-CpG-binding protein 2                                    | 3.34             | 0.213              | 2.0E-03 | 4               | 11.1                |
| P60174             | Triosephosphate isomerase                                       | 3.13             | 0.168              | 5.0E-02 | 7               | 34.3                |
| P07195             | L-lactate dehydrogenase B chain                                 | 2.98             | 0.095              | 1.3E-05 | 8               | 21.6                |
| Q99536             | Synaptic vesicle membrane protein VAT-1 homolog                 | 2.88             | 0.102              | 7.2E-08 | 11              | 37.9                |
| P06748             | Nucleophosmin                                                   | 2.88             | 0.068              | 1.1E-05 | 6               | 17.3                |
| P07339             | Cathepsin D                                                     | 2.86             | 0.069              | 1.4E-07 | 6               | 13.6                |
| Q13435             | Splicing factor 3B subunit 2                                    | 2.85             | 0.238              | 2.9E-02 | 4               | 6.8                 |
| Q15907             | Ras-related protein Rab-11B                                     | 2.84             | 0.053              | 6.9E-03 | 3               | 14.7                |
| P51149             | Ras-related protein Rab-7a                                      | 2.83             | 0.094              | 9.4E-08 | 8               | 44.0                |
| P07910             | Heterogeneous nuclear ribonucleoproteins C1/C2                  | 2.78             | 0.112              | 4.2E-08 | 8               | 21.2                |
| P07737             | Profilin-1                                                      | 2.71             | 0.211              | 2.6E-03 | 3               | 17.9                |
| Q12906             | Interleukin enhancer-binding factor 3                           | 2.68             | 0.105              | 2.5E-05 | 9               | 11.6                |
| P51159             | Ras-related protein Rab-27A                                     | 2.67             | 0.240              | 9.3E-03 | 4               | 20.4                |
| Q3SY69             | Mitochondrial 10-formyltetrahydrofolate dehydrogenase           | 2.66             | 0.051              | 5.7E-05 | 4               | 4.7                 |
| P14618             | Pyruvate kinase PKM                                             | 2.61             | 0.067              | 2.2E-11 | 10              | 19.6                |
| Q00059             | Transcription factor A, mitochondrial                           | 2.60             | 0.098              | 2.7E-04 | 3               | 13.8                |
| Q9Y4W6             | AFG3-like protein 2                                             | 2.55             | 0.198              | 6.7E-03 | 6               | 8.5                 |
| Q99497             | Protein DJ-1                                                    | 2.53             | 0.291              | 1.7E-02 | 3               | 20.1                |
| P40926             | Malate dehydrogenase, mitochondrial                             | 2.48             | 0.065              | 3.2E-07 | 9               | 29.3                |
| Q13263             | Transcription intermediary factor 1-beta                        | 2.46             | 0.148              | 1.8E-02 | 3               | 2.9                 |
| P48681             | Nestin                                                          | 2.39             | 0.112              | 5.3E-05 | 4               | 3.3                 |
| P16070             | CD44 antigen                                                    | 2.39             | 0.097              | 2.0E-04 | 9               | 10.1                |
| P54652             | Heat shock-related 70 kDa protein 2                             | 2.39             | 0.069              | 1.0E-04 | 9               | 14.2                |
| P31948             | Stress-induced-phosphoprotein 1                                 | 2.37             | 0.144              | 1.8E-03 | 6               | 9.8                 |
| Q13185             | Chromobox protein homolog 3                                     | 2.33             | 0.111              | 1.5E-05 | 3               | 18.0                |
| Q14247             | Src substrate cortactin                                         | 2.33             | 0.249              | 2.3E-02 | 3               | 5.5                 |
| Q55S5J             | Heterochromatin protein 1-binding protein 3                     | 2.31             | 0.069              | 3.9E-07 | 5               | 10.3                |
| P19338             | Nucleolin                                                       | 2.31             | 0.106              | 4.8E-07 | 13              | 17.5                |
| P23246             | Splicing factor, proline- and glutamine-rich                    | 2.26             | 0.190              | 4.6E-02 | 5               | 7.4                 |
| P61604             | 10 kDa heat shock protein, mitochondrial                        | 2.25             | 0.174              | 4.6E-02 | 4               | 29.4                |
| Q00839             | Heterogeneous nuclear ribonucleoprotein U                       | 2.25             | 0.103              | 1.7E-04 | 8               | 8.8                 |
| P07602             | Prosaposin                                                      | 2.23             | 0.222              | 3.5E-02 | 4               | 6.9                 |
| Q9UKM9             | RNA-binding protein Raly                                        | 2.22             | 0.039              | 1.7E-06 | 3               | 13.1                |
| P99999             | Cytochrome c                                                    | 2.21             | 0.147              | 3.7E-03 | 3               | 24.8                |
| P05204             | Non-histone chromosomal protein HMG-17                          | 7.65             | NA                 | NA      | 2               | 35.6                |
| Q9NYF8             | Bcl-2-associated transcription factor 1                         | 4.37             | NA                 | NA      | 2               | 4.2                 |
| P17096             | High mobility group protein HMG-I/HMG-Y                         | 4.17             | NA                 | NA      | 2               | 23.4                |
| O75348             | V-type proton ATPase subunit G 1                                | 3.95             | NA                 | NA      | 2               | 19.5                |
| P07108             | Acyl-CoA-binding protein                                        | 3.91             | NA                 | NA      | 2               | 41.4                |
| P52565             | Rho GDP-dissociation inhibitor 1                                | 3.54             | NA                 | NA      | 2               | 14.7                |
| P23381             | Tryptophan-tRNA ligase, cytoplasmic                             | 3.53             | NA                 | NA      | 2               | 4.9                 |
| P10599             | Thioredoxin                                                     | 3.32             | NA                 | NA      | 2               | 20.0                |
| P40925             | Malate dehydrogenase, cytoplasmic                               | 3.32             | NA                 | NA      | 2               | 6.6                 |
| P63241             | Eukaryotic translation initiation factor 5A-1                   | 3.32             | 0.346              | 1.1E-01 | 4               | 27.9                |
| P07686             | Beta-hexosaminidase subunit beta                                | 3.22             | 0.297              | 5.1E-02 | 3               | 6.5                 |
| P08621             | U1 small nuclear ribonucleoprotein 70 kDa                       | 3.21             | NA                 | NA      | 2               | 4.3                 |
| Q07955             | Serine/arginine-rich splicing factor 1                          | 3.19             | 0.314              | 1.1E-01 | 3               | 8.5                 |
| P55809             | Succinyl-CoA:3-ketoacid coenzyme A transferase 1, mitochondrial | 3.09             | NA                 | NA      | 2               | 3.5                 |
| P16152             | Carbonyl reductase [NADPH] 1                                    | 3.05             | NA                 | NA      | 2               | 7.6                 |
| Q95292             | Vesicle-associated membrane protein-associated protein B/C      | 3.02             | NA                 | NA      | 2               | 11.1                |
| O14556             | Glyceraldehyde-3-phosphate dehydrogenase, testis-specific       | 2.97             | NA                 | NA      | 2               | 6.1                 |
| P05141             | ADP/ATP translocase 2                                           | 2.79             | NA                 | NA      | 2               | 7.7                 |
| P07954             | Fumarate hydratase, mitochondrial                               | 2.77             | NA                 | NA      | 2               | 4.3                 |
| P06865             | Beta-hexosaminidase subunit alpha                               | 2.73             | NA                 | NA      | 2               | 3.6                 |
| Q01105             | Protein SET                                                     | 2.70             | 0.533              | 7.0E-02 | 3               | 11.7                |
| Q9Y653             | G-protein coupled receptor 56                                   | 2.69             | 0.481              | 2.3E-01 | 3               | 8.1                 |
| Q9Y2S2             | Lambda-crystallin homolog                                       | 2.62             | 0.295              | 2.8E-01 | 3               | 9.1                 |
| Q06323             | Proteasome activator complex subunit 1                          | 2.61             | 0.432              | 2.2E-01 | 3               | 14.5                |
| Q13243             | Serine/arginine-rich splicing factor 5                          | 2.54             | NA                 | NA      | 2               | 5.9                 |
| Q9Y2X3             | Nucleolar protein 58                                            | 2.54             | 0.168              | 8.1E-02 | 3               | 8.1                 |
| P04181             | Ornithine aminotransferase, mitochondrial                       | 2.47             | NA                 | NA      | 2               | 5.0                 |
| O95336             | 6-phosphogluconolactonase                                       | 2.45             | NA                 | NA      | 2               | 8.9                 |
| Q13838             | Spliceosome RNA helicase DDX39B                                 | 2.38             | NA                 | NA      | 2               | 5.1                 |
| Q16666             | Gamma-interferon-inducible protein 16                           | 2.33             | NA                 | NA      | 2               | 2.5                 |
| P63104             | 14-3-3 protein zeta/delta                                       | 2.32             | 0.136              | 7.1E-02 | 3               | 18.0                |
| Q5JNZ5             | Putative 40S ribosomal protein S26-like 1                       | 2.32             | NA                 | NA      | 2               | 20.9                |
| Q9P0L0             | Vesicle-associated membrane protein-associated protein A        | 2.24             | NA                 | NA      | 2               | 8.8                 |
| Q9NY12             | H/ACA ribonucleoprotein complex subunit 1                       | 2.23             | NA                 | NA      | 2               | 7.4                 |
| Q16576             | Histone-binding protein RBBP7                                   | 2.22             | NA                 | NA      | 2               | 3.5                 |
| P13674             | Prolyl 4-hydroxylase subunit alpha-1                            | 2.20             | NA                 | NA      | 2               | 4.7                 |
| P33121             | Long-chain-fatty-acid--CoA ligase 1                             | 2.18             | 0.526              | 3.7E-01 | 3               | 5.3                 |
| O60506             | Heterogeneous nuclear ribonucleoprotein Q                       | 2.18             | 0.183              | 2.9E-03 | 3               | 5.8                 |
| P22392             | Nucleoside diphosphate kinase B                                 | 2.17             | 0.130              | 1.9E-02 | 4               | 30.3                |
| P50395             | Rab GDP dissociation inhibitor beta                             | 2.16             | 0.176              | 1.0E-02 | 5               | 14.2                |
| Q15063             | Periostin                                                       | 2.15             | 0.192              | 9.5E-03 | 6               | 9.2                 |
| O14818             | Proteasome subunit alpha type-7                                 | 2.15             | 0.351              | 1.5E-01 | 3               | 13.7                |
| P61247             | 40S ribosomal protein S3a                                       | 2.15             | 0.334              | 1.2E-01 | 6               | 25.0                |
| P07858             | Cathepsin B                                                     | 2.14             | 0.175              | 1.9E-02 | 4               | 13.6                |
| P38646             | Stress-70 protein, mitochondrial                                | 2.13             | 0.099              | 1.3E-07 | 10              | 19.4                |
| O43390             | Heterogeneous nuclear ribonucleoprotein R                       | 2.12             | 0.109              | 1.6E-04 | 7               | 11.5                |
| P07900             | Heat shock protein HSP 90-alpha                                 | 2.11             | 0.079              | 3.1E-04 | 11              | 14.1                |

Table S7-Sample UM20

|        |                                                                          |      |        |         |    |      |
|--------|--------------------------------------------------------------------------|------|--------|---------|----|------|
| P62750 | 60S ribosomal protein L23a                                               | 2.11 | 0.110  | 2.2E-02 | 3  | 19.9 |
| P08195 | 4F2 cell-surface antigen heavy chain                                     | 2.10 | 0.099  | 1.1E-04 | 8  | 16.5 |
| P14866 | Heterogeneous nuclear ribonucleoprotein L                                | 2.08 | 0.099  | 1.1E-04 | 5  | 10.0 |
| P10644 | cAMP-dependent protein kinase type I-alpha regulatory subunit            | 2.06 | 0.234  | 9.7E-02 | 3  | 5.5  |
| P50402 | Emerin                                                                   | 2.06 | NA     | NA      | 2  | 9.8  |
| Q16836 | Hydroxyacyl-coenzyme A dehydrogenase, mitochondrial                      | 2.06 | NA     | NA      | 2  | 7.3  |
| P06454 | Prothymosin alpha                                                        | 2.04 | NA     | NA      | 2  | 21.6 |
| P52597 | Heterogeneous nuclear ribonucleoprotein F                                | 2.03 | 0.261  | 1.0E-01 | 3  | 3.1  |
| P23284 | Peptidyl-prolyl cis-trans isomerase B                                    | 2.02 | 0.104  | 5.3E-07 | 11 | 41.7 |
| Q16629 | Serine/arginine-rich splicing factor 7                                   | 2.01 | NA     | NA      | 2  | 7.6  |
| Q43809 | Cleavage and polyadenylation specificity factor subunit 5                | 2.00 | NA     | NA      | 2  | 13.2 |
| Q9U112 | V-type proton ATPase subunit H                                           | 1.99 | NA     | NA      | 2  | 4.1  |
| P19367 | Hexokinase-1                                                             | 1.99 | 0.075  | 4.0E-05 | 10 | 11.0 |
| P08758 | Annexin A5                                                               | 1.98 | 0.072  | 6.2E-09 | 13 | 40.3 |
| P26006 | Integrin alpha-3                                                         | 1.96 | 0.131  | 1.5E-02 | 4  | 4.5  |
| Q1KMD3 | Heterogeneous nuclear ribonucleoprotein U-like protein 2                 | 1.96 | 0.289  | 1.7E-01 | 3  | 4.3  |
| Q9UKV3 | Apoptotic chromatin condensation inducer in the nucleus                  | 1.96 | 0.255  | 7.0E-02 | 4  | 3.7  |
| P46776 | 60S ribosomal protein L27a                                               | 1.96 | 0.309  | 1.1E-01 | 3  | 17.6 |
| Q75396 | Vesicle-trafficking protein SEC22b                                       | 1.95 | 0.086  | 5.4E-03 | 4  | 22.3 |
| Q13151 | Heterogeneous nuclear ribonucleoprotein A0                               | 1.94 | 0.220  | 6.6E-02 | 4  | 9.8  |
| P22626 | Heterogeneous nuclear ribonucleoproteins A2/B1                           | 1.94 | 0.079  | 4.3E-08 | 13 | 30.0 |
| Q9Y696 | Chloride intracellular channel protein 4                                 | 1.94 | NA     | NA      | 2  | 7.1  |
| Q9GZ78 | Mitochondrial fission factor                                             | 1.93 | NA     | NA      | 2  | 6.4  |
| O14745 | Na(+)/H(+) exchange regulatory cofactor NHE-RF1                          | 1.92 | 0.746  | 3.2E-01 | 3  | 14.2 |
| Q15631 | Translin                                                                 | 1.92 | 0.260  | 8.2E-02 | 3  | 14.0 |
| P09651 | Heterogeneous nuclear ribonucleoprotein A1                               | 1.92 | 0.144  | 9.9E-04 | 7  | 21.0 |
| O75915 | PRA1 family protein 3                                                    | 1.92 | NA     | NA      | 2  | 9.6  |
| Q86V81 | THO complex subunit 4                                                    | 1.91 | NA     | NA      | 2  | 8.2  |
| P31040 | Succinate dehydrogenase [ubiquinone] flavoprotein subunit, mitochondrial | 1.90 | 0.176  | 3.6E-02 | 3  | 3.2  |
| Q9UJZ1 | Stomatin-like protein 2, mitochondrial                                   | 1.89 | NA     | NA      | 2  | 7.3  |
| Q5JRX3 | Presequence protease, mitochondrial                                      | 1.89 | 0.300  | 5.9E-02 | 3  | 4.4  |
| P14314 | Glucosidase 2 subunit beta                                               | 1.89 | 0.073  | 2.9E-06 | 8  | 11.6 |
| P08238 | Heat shock protein HSP 90-beta                                           | 1.89 | 0.127  | 1.5E-03 | 8  | 11.3 |
| P51991 | Heterogeneous nuclear ribonucleoprotein A3                               | 1.89 | 0.044  | 4.4E-06 | 6  | 17.7 |
| P61421 | V-type proton ATPase subunit d 1                                         | 1.89 | 0.092  | 1.7E-04 | 3  | 7.7  |
| Q99879 | Histone H2B type 1-M                                                     | 1.88 | NA     | NA      | 2  | 7.9  |
| Q14108 | Lysosome membrane protein 2                                              | 1.87 | 0.127  | 9.0E-04 | 5  | 11.1 |
| P50454 | Serpin H1                                                                | 1.86 | 0.239  | 3.0E-02 | 3  | 10.0 |
| Q86UX7 | Fermitin family homolog 3                                                | 1.85 | NA     | NA      | 2  | 3.9  |
| Q12905 | Interleukin enhancer-binding factor 2                                    | 1.85 | NA     | NA      | 2  | 6.7  |
| Q04760 | Lactoylglutathione lyase                                                 | 1.85 | NA     | NA      | 2  | 10.3 |
| P21912 | Succinate dehydrogenase [ubiquinone] iron-sulfur subunit, mitochondrial  | 1.85 | 0.042  | 1.2E-06 | 3  | 11.4 |
| O75083 | WD repeat-containing protein 1                                           | 1.84 | 0.135  | 1.1E-02 | 5  | 8.6  |
| P40967 | Melanocyte protein PMEL                                                  | 1.84 | NA     | NA      | 2  | 3.3  |
| Q14103 | Heterogeneous nuclear ribonucleoprotein D0                               | 1.83 | NA     | NA      | 2  | 6.8  |
| P01857 | Ig gamma-1 chain C region                                                | 1.83 | 0.100  | 1.1E-04 | 6  | 30.3 |
| Q96KP4 | Cytosolic non-specific dipeptidase                                       | 1.82 | NA     | NA      | 2  | 6.5  |
| Q9UH65 | Switch-associated protein 70                                             | 1.82 | NA     | NA      | 2  | 2.1  |
| P09429 | High mobility group protein B1                                           | 1.82 | 0.195  | 2.2E-02 | 5  | 27.4 |
| Q86U42 | Polyadenylate-binding protein 2                                          | 1.82 | NA     | NA      | 2  | 5.6  |
| Q99798 | Aconitate hydratase, mitochondrial                                       | 1.82 | 0.324  | 4.4E-02 | 5  | 7.3  |
| O75436 | Vacuolar protein sorting-associated protein 26A                          | 1.81 | NA     | NA      | 2  | 7.0  |
| P30044 | Peroxisomal protein PEX5, mitochondrial                                  | 1.80 | NA     | NA      | 2  | 11.7 |
| P02545 | Prelamin-A/C                                                             | 1.80 | 0.046  | 4.4E-16 | 37 | 51.4 |
| P30101 | Protein disulfide-isomerase A3                                           | 1.80 | 0.093  | 1.8E-05 | 13 | 23.8 |
| Q9UHX1 | Poly(U)-binding-splicing factor PUF60                                    | 1.80 | 0.312  | 1.1E-01 | 3  | 5.0  |
| Q08211 | ATP-dependent RNA helicase A                                             | 1.79 | 0.140  | 4.4E-03 | 6  | 5.7  |
| O14979 | Heterogeneous nuclear ribonucleoprotein D-like                           | 1.79 | 0.061  | 3.5E-03 | 3  | 4.5  |
| P27797 | Calreticulin                                                             | 1.79 | 0.134  | 4.5E-02 | 7  | 21.1 |
| Q9UMY4 | Sorting nexin-12                                                         | 1.78 | NA     | NA      | 2  | 9.9  |
| P21796 | Voltage-dependent anion-selective channel protein 1                      | 1.78 | 0.083  | 4.0E-03 | 6  | 19.8 |
| Q07020 | 60S ribosomal protein L18                                                | 1.78 | 0.037  | 5.2E-06 | 3  | 19.7 |
| Q15181 | Inorganic pyrophosphatase                                                | 1.77 | NA     | NA      | 2  | 6.2  |
| P55786 | Puromycin-sensitive aminopeptidase                                       | 1.77 | 0.219  | 8.5E-02 | 4  | 5.1  |
| Q99523 | Sortilin                                                                 | 1.76 | 0.069  | 3.8E-02 | 3  | 6.1  |
| P83731 | 60S ribosomal protein L24                                                | 1.76 | 0.100  | 5.2E-04 | 5  | 26.8 |
| Q94826 | Mitochondrial import receptor subunit TOM70                              | 1.76 | 0.110  | 8.8E-02 | 4  | 6.3  |
| O75390 | Citrate synthase, mitochondrial                                          | 1.76 | 0.121  | 4.2E-02 | 4  | 8.4  |
| Q08380 | Galectin-3-binding protein                                               | 1.76 | NA     | NA      | 2  | 5.0  |
| P53597 | Succinyl-CoA ligase [ADP/GDP-forming] subunit alpha, mitochondrial       | 1.75 | NA     | NA      | 2  | 6.9  |
| Q02318 | Sterol 26-hydroxylase, mitochondrial                                     | 1.74 | NA     | NA      | 2  | 5.6  |
| Q14139 | Ubiquitin conjugation factor E4 A                                        | 1.73 | NA     | NA      | 2  | 2.6  |
| P09211 | Glutathione S-transferase P                                              | 1.73 | 0.185  | 4.4E-01 | 4  | 25.2 |
| P84103 | Serine/arginine-rich splicing factor 3                                   | 1.73 | NA     | NA      | 2  | 10.4 |
| P27816 | Microtubule-associated protein 4                                         | 1.73 | NA     | NA      | 2  | 2.9  |
| Q9UHQ9 | NADH-cytochrome b5 reductase 1                                           | 1.71 | 0.112  | 3.6E-03 | 4  | 15.1 |
| P06744 | Glucose-6-phosphate isomerase                                            | 1.71 | 0.128  | 2.4E-02 | 4  | 6.8  |
| P49257 | Protein ERGIC-53                                                         | 1.70 | 0.226  | 9.9E-02 | 3  | 11.4 |
| P18859 | ATP synthase-coupling factor 6, mitochondrial                            | 1.70 | 10.859 | 5.3E-01 | 3  | 30.6 |
| O00567 | Nucleolar protein 56                                                     | 1.70 | 0.145  | 4.2E-02 | 5  | 7.6  |
| P13639 | Elongation factor 2                                                      | 1.69 | 0.145  | 8.9E-03 | 6  | 7.6  |
| P10619 | Lysosomal protective protein                                             | 1.69 | NA     | NA      | 2  | 5.4  |
| Q00341 | Vigilin                                                                  | 1.68 | NA     | NA      | 2  | 1.9  |
| O75494 | Serine/arginine-rich splicing factor 10                                  | 1.68 | NA     | NA      | 2  | 8.8  |
| P17480 | Nucleolar transcription factor 1                                         | 1.67 | NA     | NA      | 2  | 3.8  |
| Q9BRA2 | Thioredoxin domain-containing protein 17                                 | 1.66 | NA     | NA      | 2  | 18.7 |
| P25786 | Proteasome subunit alpha type-1                                          | 1.66 | NA     | NA      | 2  | 6.5  |
| Q13242 | Serine/arginine-rich splicing factor 9                                   | 1.66 | NA     | NA      | 2  | 9.5  |
| P17844 | Probable ATP-dependent RNA helicase DDX5                                 | 1.66 | 0.112  | 1.2E-02 | 5  | 8.6  |
| P21266 | Glutathione S-transferase Mu 3                                           | 1.65 | 0.131  | 4.8E-03 | 7  | 28.4 |
| P23528 | Cofilin-1                                                                | 1.65 | 0.112  | 2.6E-02 | 4  | 25.3 |
| O75533 | Splicing factor 3B subunit 1                                             | 1.64 | NA     | NA      | 2  | 2.7  |
| Q8TAQ2 | SWI/SNF complex subunit SMARCC2                                          | 1.64 | NA     | NA      | 2  | 1.7  |
| P11142 | Heat shock cognate 71 kDa protein                                        | 1.64 | 0.099  | 1.6E-02 | 10 | 15.9 |
| P38606 | V-type proton ATPase catalytic subunit A                                 | 1.64 | 0.119  | 1.5E-03 | 5  | 9.4  |
| P24752 | Acetyl-CoA acetyltransferase, mitochondrial                              | 1.64 | 0.066  | 1.6E-02 | 6  | 16.2 |
| P14678 | Small nuclear ribonucleoprotein-associated proteins B and B'             | 1.64 | NA     | NA      | 2  | 6.3  |
| P51572 | B-cell receptor-associated protein 31                                    | 1.64 | 0.265  | 1.6E-01 | 7  | 25.6 |
| P09669 | Cytochrome c oxidase subunit 6C                                          | 1.64 | 0.080  | 1.1E-03 | 4  | 48.0 |
| P54727 | UV excision repair protein RAD23 homolog B                               | 1.63 | NA     | NA      | 2  | 5.4  |
| Q9NYL4 | Peptidyl-prolyl cis-trans isomerase FKBP11                               | 1.63 | NA     | NA      | 2  | 10.4 |
| P13797 | Plastin-3                                                                | 1.63 | 0.259  | 4.6E-02 | 7  | 12.1 |
| P30049 | ATP synthase subunit delta, mitochondrial                                | 1.63 | NA     | NA      | 2  | 13.7 |
| Q15717 | ELAV-like protein 1                                                      | 1.63 | 0.390  | 3.8E-01 | 3  | 11.7 |
| Q14165 | Malectin                                                                 | 1.62 | NA     | NA      | 2  | 4.8  |
| P18669 | Phosphoglycerate mutase 1                                                | 1.62 | 0.148  | 3.7E-02 | 4  | 26.8 |
| O95571 | Persulfide dioxygenase ETHE1, mitochondrial                              | 1.62 | NA     | NA      | 2  | 12.2 |

Table S7-Sample UM20

|        |                                                                                |      |       |         |    |      |
|--------|--------------------------------------------------------------------------------|------|-------|---------|----|------|
| P21281 | V-type proton ATPase subunit B, brain isoform                                  | 1.62 | 0.137 | 7.6E-02 | 4  | 9.8  |
| P10809 | 60 kDa heat shock protein, mitochondrial                                       | 1.61 | 0.186 | 6.8E-02 | 8  | 10.5 |
| P62158 | Calmodulin                                                                     | 1.61 | 0.165 | 1.6E-02 | 6  | 32.9 |
| P61353 | 60S ribosomal protein L27                                                      | 1.61 | NA    | NA      | 2  | 22.1 |
| P54819 | Adenylate kinase 2, mitochondrial                                              | 1.61 | 0.146 | 3.4E-01 | 4  | 18.8 |
| Q14697 | Neutral alpha-glucosidase AB                                                   | 1.61 | 0.129 | 3.4E-04 | 14 | 15.6 |
| O00154 | Cytosolic acyl coenzyme A thioester hydrolase                                  | 1.60 | 0.159 | 5.7E-02 | 4  | 15.5 |
| Q9BWM7 | Sideroflexin-3                                                                 | 1.60 | NA    | NA      | 2  | 8.3  |
| P13473 | Lysosome-associated membrane glycoprotein 2                                    | 1.60 | NA    | NA      | 2  | 4.9  |
| Q96AG4 | Leucine-rich repeat-containing protein 59                                      | 1.60 | 0.264 | 1.8E-01 | 3  | 10.4 |
| Q12874 | Splicing factor 3A subunit 3                                                   | 1.60 | NA    | NA      | 2  | 4.0  |
| P08865 | 40S ribosomal protein SA                                                       | 1.60 | 0.093 | 3.8E-02 | 4  | 11.9 |
| P52272 | Heterogeneous nuclear ribonucleoprotein M                                      | 1.59 | 0.069 | 4.7E-03 | 6  | 10.3 |
| P46777 | 60S ribosomal protein L5                                                       | 1.59 | 0.195 | 2.8E-02 | 6  | 22.2 |
| Q13596 | Sorting nexin-1                                                                | 1.59 | NA    | NA      | 2  | 4.6  |
| P39687 | Acidic leucine-rich nuclear phosphoprotein 32 family member A                  | 1.59 | NA    | NA      | 2  | 9.6  |
| O43175 | D-3-phosphoglycerate dehydrogenase                                             | 1.58 | 0.142 | 2.9E-02 | 6  | 14.8 |
| Q8N2K0 | Monoacylglycerol lipase ABHD12                                                 | 1.58 | NA    | NA      | 2  | 5.3  |
| P42704 | Leucine-rich PPR motif-containing protein, mitochondrial                       | 1.58 | 0.215 | 4.2E-02 | 5  | 3.6  |
| O00483 | NADH dehydrogenase [ubiquinone] 1 alpha subcomplex subunit 4                   | 1.58 | NA    | NA      | 2  | 22.2 |
| Q15084 | Protein disulfide-isomerase A6                                                 | 1.57 | 0.347 | 2.4E-02 | 5  | 13.6 |
| P25398 | 40S ribosomal protein S12                                                      | 1.57 | NA    | NA      | 2  | 13.6 |
| O43488 | Aflatoxin B1 aldehyde reductase member 2                                       | 1.57 | NA    | NA      | 2  | 5.3  |
| P01023 | Alpha-2-macroglobulin                                                          | 1.57 | 0.071 | 1.8E-04 | 13 | 10.9 |
| P23526 | Adenosylhomocysteinase                                                         | 1.57 | NA    | NA      | 2  | 5.1  |
| P13073 | Cytochrome c oxidase subunit 4 isoform 1, mitochondrial                        | 1.57 | 0.063 | 1.0E-03 | 4  | 25.4 |
| Q9Y6C9 | Mitochondrial carrier homolog 2                                                | 1.57 | NA    | NA      | 2  | 7.3  |
| Q15233 | Non-POU domain-containing octamer-binding protein                              | 1.57 | 0.412 | 2.0E-01 | 6  | 13.0 |
| P30041 | Peroxisomal protein 6                                                          | 1.57 | 0.058 | 1.9E-04 | 6  | 20.1 |
| Q86UP2 | Kinectin                                                                       | 1.55 | 0.072 | 2.8E-03 | 9  | 8.0  |
| P47985 | Cytochrome b-c1 complex subunit Rieske, mitochondrial                          | 1.55 | 0.148 | 1.8E-02 | 3  | 11.3 |
| P25788 | Proteasome subunit alpha type-3                                                | 1.53 | 0.313 | 1.8E-01 | 3  | 9.4  |
| P51858 | Hepatoma-derived growth factor                                                 | 1.52 | NA    | NA      | 2  | 11.7 |
| Q53EL6 | Programmed cell death protein 4                                                | 1.52 | NA    | NA      | 2  | 4.7  |
| Q5JTV8 | Torsin-1A-interacting protein 1                                                | 1.52 | 0.150 | 1.7E-01 | 3  | 5.7  |
| Q9Y411 | Unconventional myosin-Va                                                       | 1.52 | 0.223 | 2.2E-02 | 8  | 4.6  |
| P49591 | Serine--tRNA ligase, cytoplasmic                                               | 1.52 | 0.150 | 2.4E-02 | 4  | 11.7 |
| P16219 | Short-chain specific acyl-CoA dehydrogenase, mitochondrial                     | 1.51 | NA    | NA      | 2  | 4.6  |
| O00231 | 26S proteasome non-ATPase regulatory subunit 11                                | 1.51 | 0.288 | 3.3E-01 | 3  | 6.6  |
| P60981 | Destrin                                                                        | 1.51 | NA    | NA      | 2  | 13.3 |
| P51970 | NADH dehydrogenase [ubiquinone] 1 alpha subcomplex subunit 8                   | 1.51 | NA    | NA      | 2  | 8.7  |
| Q9Y6M9 | NADH dehydrogenase [ubiquinone] 1 beta subcomplex subunit 9                    | 1.50 | NA    | NA      | 2  | 15.6 |
| P10606 | Cytochrome c oxidase subunit 5B, mitochondrial                                 | 1.49 | 0.059 | 1.6E-02 | 4  | 25.6 |
| P62906 | 60S ribosomal protein L10a                                                     | 1.49 | 0.167 | 2.9E-02 | 7  | 29.0 |
| P50914 | 60S ribosomal protein L14                                                      | 1.49 | NA    | NA      | 2  | 10.7 |
| P61978 | Heterogeneous nuclear ribonucleoprotein K                                      | 1.49 | 0.117 | 3.3E-03 | 14 | 29.8 |
| P07237 | Protein disulfide-isomerase                                                    | 1.48 | 0.116 | 3.3E-02 | 10 | 15.6 |
| P12270 | Nucleoprotein TPR                                                              | 1.48 | 0.252 | 1.7E-01 | 6  | 3.7  |
| O75643 | U5 small nuclear ribonucleoprotein 200 kDa helicase                            | 1.48 | NA    | NA      | 2  | 0.9  |
| P51810 | G-protein coupled receptor 143                                                 | 1.48 | NA    | NA      | 2  | 5.7  |
| P05387 | 60S acidic ribosomal protein P2                                                | 1.48 | 0.155 | 9.1E-02 | 3  | 25.2 |
| Q9NX63 | Coiled-coil-helix-coiled-coil-helix domain-containing protein 3, mitochondrial | 1.48 | NA    | NA      | 2  | 6.6  |
| P61254 | 60S ribosomal protein L26                                                      | 1.47 | 0.125 | 1.4E-01 | 3  | 17.9 |
| Q9BUJ2 | Heterogeneous nuclear ribonucleoprotein U-like protein 1                       | 1.47 | NA    | NA      | 2  | 3.4  |
| Q96I99 | Succinyl-CoA ligase [GDP-forming] subunit beta, mitochondrial                  | 1.47 | NA    | NA      | 2  | 4.9  |
| P46940 | Ras GTPase-activating-like protein IQGAP1                                      | 1.47 | 0.194 | 1.3E-02 | 6  | 5.1  |
| Q15102 | Platelet-activating factor acetylhydrolase IB subunit gamma                    | 1.47 | 0.346 | 4.0E-01 | 3  | 13.0 |
| Q14683 | Structural maintenance of chromosomes protein 1A                               | 1.47 | NA    | NA      | 2  | 1.7  |
| P00441 | Superoxide dismutase [Cu-Zn]                                                   | 1.47 | NA    | NA      | 2  | 13.0 |
| P50213 | Isocitrate dehydrogenase [NAD] subunit alpha, mitochondrial                    | 1.46 | 0.091 | 5.0E-03 | 4  | 12.8 |
| Q99653 | Calcineurin B homologous protein 1                                             | 1.46 | 0.120 | 7.2E-02 | 3  | 19.0 |
| P07305 | Histone H1.0                                                                   | 1.46 | 0.182 | 2.0E-01 | 3  | 16.0 |
| P62136 | Serine/threonine-protein phosphatase PP1-alpha catalytic subunit               | 1.45 | NA    | NA      | 2  | 8.2  |
| Q9BZQ8 | Protein Niban                                                                  | 1.45 | NA    | NA      | 2  | 2.2  |
| Q07666 | KH domain-containing, RNA-binding, signal transduction-associated protein 1    | 1.45 | 0.055 | 2.4E-03 | 4  | 7.9  |
| P43304 | Glycerol-3-phosphate dehydrogenase, mitochondrial                              | 1.45 | 0.097 | 1.1E-01 | 3  | 5.0  |
| P26640 | Valine--tRNA ligase                                                            | 1.45 | NA    | NA      | 2  | 2.4  |
| Q8NBJ7 | Sulfatase-modifying factor 2                                                   | 1.43 | NA    | NA      | 2  | 4.3  |
| P38919 | Eukaryotic initiation factor 4A-III                                            | 1.43 | NA    | NA      | 2  | 6.3  |
| Q92896 | Golgi apparatus protein 1                                                      | 1.43 | 0.276 | 8.8E-02 | 4  | 3.5  |
| P22695 | Cytochrome b-c1 complex subunit 2, mitochondrial                               | 1.42 | 0.125 | 1.3E-02 | 5  | 13.9 |
| Q9Y2B0 | Protein canopy homolog 2                                                       | 1.42 | 1.038 | 5.9E-01 | 3  | 22.0 |
| P62277 | 40S ribosomal protein S13                                                      | 1.42 | 0.167 | 5.8E-02 | 5  | 34.4 |
| P49411 | Elongation factor Tu, mitochondrial                                            | 1.42 | 0.069 | 4.0E-04 | 9  | 20.4 |
| P35232 | Prohibitin                                                                     | 1.42 | 0.044 | 1.4E-05 | 8  | 29.4 |
| P62280 | 40S ribosomal protein S11                                                      | 1.42 | 0.557 | 5.8E-01 | 4  | 13.3 |
| P04075 | Fructose-bisphosphate aldolase A                                               | 1.41 | 0.169 | 4.2E-02 | 11 | 36.3 |
| Q8N5K1 | CDGSH iron-sulfur domain-containing protein 2                                  | 1.41 | 0.214 | 1.6E-01 | 3  | 23.7 |
| Q9ULV4 | Coronin-1C                                                                     | 1.41 | NA    | NA      | 2  | 5.3  |
| P61158 | Actin-related protein 3                                                        | 1.40 | 0.040 | 2.6E-04 | 4  | 10.8 |
| P37108 | Signal recognition particle 14 kDa protein                                     | 1.40 | NA    | NA      | 2  | 16.9 |
| Q9P2E9 | Ribosome-binding protein 1                                                     | 1.40 | 0.249 | 1.5E-01 | 4  | 3.9  |
| O60262 | Guanine nucleotide-binding protein G(I)/G(S)/G(O) subunit gamma-7              | 1.39 | NA    | NA      | 2  | 30.9 |
| Q9BQI0 | Allograft inflammatory factor 1-like                                           | 1.39 | NA    | NA      | 2  | 10.0 |
| P26599 | Poly(pyrimidine tract)-binding protein 1                                       | 1.39 | 0.229 | 1.0E-01 | 3  | 4.5  |
| Q14980 | Nuclear mitotic apparatus protein 1                                            | 1.39 | 0.343 | 6.5E-02 | 9  | 6.1  |
| P48047 | ATP synthase subunit O, mitochondrial                                          | 1.39 | 0.153 | 2.6E-01 | 8  | 44.1 |
| P62249 | 40S ribosomal protein S16                                                      | 1.38 | NA    | NA      | 2  | 15.8 |
| P01834 | Ig kappa chain C region                                                        | 1.38 | NA    | NA      | 2  | 34.9 |
| Q13217 | DnaJ homolog subfamily C member 3                                              | 1.38 | NA    | NA      | 2  | 3.6  |
| Q16891 | Mitochondrial inner membrane protein                                           | 1.38 | 0.139 | 2.6E-02 | 9  | 15.2 |
| P11498 | Pyruvate carboxylase, mitochondrial                                            | 1.37 | NA    | NA      | 2  | 2.7  |
| Q13162 | Peroxisomal protein 4                                                          | 1.37 | 0.113 | 3.9E-01 | 3  | 12.9 |
| P38117 | Electron transfer flavoprotein subunit beta                                    | 1.37 | 0.124 | 1.7E-01 | 5  | 19.2 |
| P09012 | U1 small nuclear ribonucleoprotein A                                           | 1.37 | 0.136 | 1.0E-01 | 3  | 11.0 |
| P0CG05 | Ig lambda-2 chain C regions                                                    | 1.37 | NA    | NA      | 2  | 23.6 |
| Q9UIJ7 | GTP:AMP phosphotransferase AK3, mitochondrial                                  | 1.37 | 0.239 | 3.9E-01 | 3  | 15.0 |
| P62263 | 40S ribosomal protein S14                                                      | 1.37 | 0.058 | 2.9E-02 | 3  | 29.1 |
| Q8NBS9 | Thioredoxin domain-containing protein 5                                        | 1.37 | 0.134 | 1.4E-01 | 6  | 14.6 |
| P22314 | Ubiquitin-like modifier-activating enzyme 1                                    | 1.36 | 0.368 | 1.7E-01 | 6  | 5.7  |
| P00352 | Retinal dehydrogenase 1                                                        | 1.36 | 0.164 | 5.0E-02 | 8  | 16.4 |
| P00505 | Aspartate aminotransferase, mitochondrial                                      | 1.35 | 0.144 | 1.4E-01 | 7  | 17.7 |
| P62851 | 40S ribosomal protein S25                                                      | 1.35 | 0.102 | 2.2E-02 | 4  | 24.0 |
| Q00765 | Receptor expression-enhancing protein 5                                        | 1.35 | 3.790 | 3.0E-01 | 3  | 10.6 |
| Q9NZ08 | Endoplasmic reticulum aminopeptidase 1                                         | 1.35 | NA    | NA      | 2  | 2.2  |
| P39019 | 40S ribosomal protein S19                                                      | 1.35 | 0.088 | 3.8E-02 | 3  | 22.1 |
| Q15691 | Microtubule-associated protein RP/EB family member 1                           | 1.34 | 1.356 | 3.0E-01 | 3  | 9.7  |

Table S7-Sample UM20

|        |                                                                                                                 |      |       |         |    |      |
|--------|-----------------------------------------------------------------------------------------------------------------|------|-------|---------|----|------|
| Q99442 | Translocation protein SEC62                                                                                     | 1.33 | 0.052 | 1.2E-02 | 3  | 7.3  |
| P04843 | Dolichyl-diphosphooligosaccharide--protein glycosyltransferase subunit 1                                        | 1.33 | 0.067 | 7.7E-04 | 10 | 17.8 |
| P12956 | X-ray repair cross-complementing protein 6                                                                      | 1.33 | 0.123 | 1.2E-02 | 7  | 12.0 |
| Q9BS26 | Endoplasmic reticulum resident protein 44                                                                       | 1.33 | 0.092 | 3.0E-02 | 4  | 10.1 |
| P26373 | 60S ribosomal protein L13                                                                                       | 1.33 | 0.119 | 2.0E-02 | 3  | 14.2 |
| O75964 | ATP synthase subunit g, mitochondrial                                                                           | 1.33 | NA    | NA      | 2  | 27.2 |
| P27824 | Calnexin                                                                                                        | 1.32 | 0.203 | 6.1E-02 | 8  | 15.2 |
| P78527 | DNA-dependent protein kinase catalytic subunit                                                                  | 1.32 | 0.152 | 1.2E-02 | 13 | 2.9  |
| Q9NTJ5 | Phosphatidylinositol phosphatase SAC1                                                                           | 1.32 | 0.105 | 5.3E-02 | 6  | 8.9  |
| P61160 | Actin-related protein 2                                                                                         | 1.32 | 0.168 | 2.6E-02 | 4  | 9.9  |
| O43852 | Calumenin                                                                                                       | 1.31 | 0.256 | 1.8E-01 | 4  | 13.3 |
| Q99584 | Protein S100-A13                                                                                                | 1.31 | 0.084 | 8.1E-03 | 6  | 49.0 |
| Q14974 | Importin subunit beta-1                                                                                         | 1.31 | 0.256 | 4.9E-01 | 4  | 6.7  |
| P49773 | Histidine triad nucleotide-binding protein 1                                                                    | 1.31 | NA    | NA      | 2  | 26.2 |
| O14773 | Tripeptidyl-peptidase 1                                                                                         | 1.30 | NA    | NA      | 2  | 5.0  |
| P0CW22 | 40S ribosomal protein S17-like                                                                                  | 1.30 | 0.158 | 5.7E-02 | 3  | 16.3 |
| Q86WV6 | Stimulator of interferon genes protein                                                                          | 1.30 | NA    | NA      | 2  | 5.8  |
| P26641 | Elongation factor 1-gamma                                                                                       | 1.30 | 0.210 | 1.6E-01 | 3  | 8.9  |
| P37235 | Hippocalcin-like protein 1                                                                                      | 1.30 | NA    | NA      | 2  | 9.3  |
| Q13011 | Delta(3,5)-Delta(2,4)-dienoyl-CoA isomerase, mitochondrial                                                      | 1.30 | 0.086 | 1.2E-02 | 6  | 17.7 |
| Q53GQ0 | Estradiol 17-beta-dehydrogenase 12                                                                              | 1.30 | 0.167 | 3.7E-01 | 3  | 11.9 |
| Q9NPA0 | ER membrane protein complex subunit 7                                                                           | 1.30 | NA    | NA      | 2  | 12.0 |
| P13010 | X-ray repair cross-complementing protein 5                                                                      | 1.30 | 0.070 | 8.0E-03 | 4  | 6.1  |
| P62899 | 60S ribosomal protein L31                                                                                       | 1.30 | NA    | NA      | 2  | 13.6 |
| P01625 | Ig kappa chain V-IV region Len                                                                                  | 1.29 | NA    | NA      | 2  | 13.2 |
| O15511 | Actin-related protein 2/3 complex subunit 5                                                                     | 1.29 | 0.265 | 4.4E-01 | 3  | 21.9 |
| Q9NP81 | Serine--tRNA ligase, mitochondrial                                                                              | 1.29 | NA    | NA      | 2  | 6.9  |
| P11310 | Medium-chain specific acyl-CoA dehydrogenase, mitochondrial                                                     | 1.29 | 0.149 | 2.7E-01 | 3  | 6.2  |
| Q16531 | DNA damage-binding protein 1                                                                                    | 1.29 | 0.373 | 3.4E-01 | 3  | 2.4  |
| A0FGR8 | Extended synaptotagmin-2                                                                                        | 1.29 | NA    | NA      | 2  | 2.8  |
| P45954 | Short/branched chain specific acyl-CoA dehydrogenase, mitochondrial                                             | 1.29 | NA    | NA      | 2  | 5.8  |
| Q96JB5 | CDK5 regulatory subunit-associated protein 3                                                                    | 1.29 | NA    | NA      | 2  | 2.6  |
| Q86VP6 | Cullin-associated NEDD8-dissociated protein 1                                                                   | 1.29 | 0.305 | 3.5E-01 | 3  | 2.8  |
| P30711 | Glutathione S-transferase theta-1                                                                               | 1.29 | NA    | NA      | 2  | 7.9  |
| P13987 | CD59 glycoprotein                                                                                               | 1.28 | NA    | NA      | 2  | 15.6 |
| P20700 | Lamin-B1                                                                                                        | 1.28 | 0.145 | 2.4E-01 | 6  | 10.6 |
| P05362 | Intercellular adhesion molecule 1                                                                               | 1.28 | 0.094 | 5.8E-02 | 3  | 7.3  |
| P46977 | Dolichyl-diphosphooligosaccharide--protein glycosyltransferase subunit STT3A                                    | 1.28 | NA    | NA      | 2  | 2.3  |
| Q15029 | 116 kDa U5 small nuclear ribonucleoprotein component                                                            | 1.28 | NA    | NA      | 2  | 2.6  |
| P06396 | Gelsolin                                                                                                        | 1.28 | 0.116 | 7.1E-02 | 13 | 17.5 |
| Q8NC56 | LEM domain-containing protein 2                                                                                 | 1.27 | 0.129 | 1.3E-01 | 3  | 6.0  |
| Q92820 | Gamma-glutamyl hydrolase                                                                                        | 1.27 | NA    | NA      | 2  | 7.2  |
| Q02878 | 60S ribosomal protein L6                                                                                        | 1.27 | 0.075 | 3.7E-02 | 6  | 21.5 |
| P30519 | Heme oxygenase 2                                                                                                | 1.26 | NA    | NA      | 2  | 10.1 |
| O75367 | Core histone macro-H2A.1                                                                                        | 1.26 | 1.104 | 3.7E-01 | 6  | 19.4 |
| Q5VTE0 | Putative elongation factor 1-alpha-like 3                                                                       | 1.26 | 0.213 | 8.5E-02 | 7  | 14.1 |
| P55084 | Trifunctional enzyme subunit beta, mitochondrial                                                                | 1.26 | 0.070 | 3.9E-03 | 11 | 19.6 |
| Q16695 | Histone H3.1t                                                                                                   | 1.25 | 0.079 | 3.6E-02 | 6  | 28.7 |
| O95881 | Thioredoxin domain-containing protein 12                                                                        | 1.25 | NA    | NA      | 2  | 14.0 |
| O60486 | Plexin-C1                                                                                                       | 1.25 | NA    | NA      | 2  | 1.3  |
| P61204 | ADP-ribosylation factor 3                                                                                       | 1.24 | NA    | NA      | 2  | 9.9  |
| P42356 | Phosphatidylinositol 4-kinase alpha                                                                             | 1.24 | NA    | NA      | 2  | 1.0  |
| P62241 | 40S ribosomal protein S8                                                                                        | 1.24 | NA    | NA      | 2  | 12.0 |
| Q02818 | Nucleobindin-1                                                                                                  | 1.24 | NA    | NA      | 2  | 6.5  |
| O14561 | Acyl carrier protein, mitochondrial                                                                             | 1.24 | NA    | NA      | 2  | 9.6  |
| P09543 | 2',3'-cyclic-nucleotide 3'-phosphodiesterase                                                                    | 1.24 | 0.107 | 4.5E-02 | 6  | 14.0 |
| P60866 | 40S ribosomal protein S20                                                                                       | 1.24 | NA    | NA      | 2  | 19.3 |
| Q95202 | LETM1 and EF-hand domain-containing protein 1, mitochondrial                                                    | 1.24 | 0.319 | 1.5E-01 | 4  | 5.3  |
| P28331 | NADH-ubiquinone oxidoreductase 75 kDa subunit, mitochondrial                                                    | 1.23 | 0.172 | 1.7E-01 | 3  | 4.5  |
| Q96124 | Far upstream element-binding protein 3                                                                          | 1.23 | NA    | NA      | 2  | 5.2  |
| P11216 | Glycogen phosphorylase, brain form                                                                              | 1.23 | 0.354 | 1.1E-01 | 7  | 11.2 |
| P55060 | Exportin-2                                                                                                      | 1.23 | NA    | NA      | 2  | 2.3  |
| Q96C19 | EF-hand domain-containing protein D2                                                                            | 1.22 | NA    | NA      | 2  | 6.3  |
| P32969 | 60S ribosomal protein L9                                                                                        | 1.22 | NA    | NA      | 2  | 5.7  |
| P35637 | RNA-binding protein FUS                                                                                         | 1.22 | 0.564 | 4.2E-01 | 3  | 7.6  |
| P23786 | Carnitine O-palmitoyltransferase 2, mitochondrial                                                               | 1.22 | NA    | NA      | 2  | 3.3  |
| P20674 | Cytochrome c oxidase subunit 5A, mitochondrial                                                                  | 1.22 | 0.930 | 2.7E-01 | 4  | 15.3 |
| P63244 | Guanine nucleotide-binding protein subunit beta-2-like 1                                                        | 1.22 | 0.113 | 4.1E-01 | 3  | 10.1 |
| Q8IV08 | Phospholipase D3                                                                                                | 1.22 | 0.038 | 1.5E-01 | 3  | 6.3  |
| P14854 | Cytochrome c oxidase subunit 6B1                                                                                | 1.22 | NA    | NA      | 2  | 23.3 |
| Q99623 | Prohibitin-2                                                                                                    | 1.22 | 0.106 | 1.3E-01 | 5  | 18.4 |
| P31146 | Coronin-1A                                                                                                      | 1.21 | NA    | NA      | 2  | 4.6  |
| P06576 | ATP synthase subunit beta, mitochondrial                                                                        | 1.21 | 0.057 | 1.5E-03 | 15 | 38.6 |
| P36957 | Dihydropolyllysine-residue succinyltransferase component of 2-oxoglutarate dehydrogenase complex, mitochondrial | 1.21 | 0.048 | 4.1E-03 | 5  | 11.5 |
| P06899 | Histone H2B type 1-J                                                                                            | 1.21 | NA    | NA      | 2  | 7.9  |
| P42167 | Lamina-associated polypeptide 2, isoforms beta/gamma                                                            | 1.21 | 0.364 | 5.7E-01 | 3  | 6.2  |
| O15144 | Actin-related protein 2/3 complex subunit 2                                                                     | 1.21 | 0.241 | 1.3E-01 | 6  | 21.0 |
| P01860 | Ig gamma-3 chain C region                                                                                       | 1.21 | NA    | NA      | 2  | 6.4  |
| P59998 | Actin-related protein 2/3 complex subunit 4                                                                     | 1.21 | 0.040 | 5.6E-03 | 3  | 16.1 |
| P40939 | Trifunctional enzyme subunit alpha, mitochondrial                                                               | 1.21 | 0.180 | 9.3E-02 | 9  | 10.9 |
| O00264 | Membrane-associated progesterone receptor component 1                                                           | 1.20 | NA    | NA      | 2  | 11.8 |
| P51665 | 26S proteasome non-ATPase regulatory subunit 7                                                                  | 1.20 | NA    | NA      | 2  | 6.2  |
| P39023 | 60S ribosomal protein L3                                                                                        | 1.20 | NA    | NA      | 2  | 4.7  |
| P09382 | Galectin-1                                                                                                      | 1.20 | 0.142 | 1.9E-02 | 6  | 46.7 |
| P04844 | Dolichyl-diphosphooligosaccharide--protein glycosyltransferase subunit 2                                        | 1.20 | NA    | NA      | 2  | 4.1  |
| Q9P0M6 | Core histone macro-H2A.2                                                                                        | 1.19 | NA    | NA      | 2  | 7.3  |
| P28838 | Cytosol aminopeptidase                                                                                          | 1.19 | 0.145 | 4.2E-01 | 3  | 7.3  |
| Q9NYU2 | UDP-glucose:glycoprotein glucosyltransferase 1                                                                  | 1.19 | NA    | NA      | 2  | 1.7  |
| P11021 | 78 kDa glucose-regulated protein                                                                                | 1.19 | 0.179 | 5.4E-02 | 18 | 27.5 |
| Q15459 | Splicing factor 3A subunit 1                                                                                    | 1.19 | NA    | NA      | 2  | 2.9  |
| P25705 | ATP synthase subunit alpha, mitochondrial                                                                       | 1.19 | 0.057 | 5.6E-03 | 15 | 34.4 |
| O75306 | NADH dehydrogenase [ubiquinone] iron-sulfur protein 2, mitochondrial                                            | 1.19 | 0.075 | 5.3E-02 | 4  | 11.2 |
| Q9Y3U8 | 60S ribosomal protein L36                                                                                       | 1.18 | 0.735 | 4.8E-01 | 4  | 30.5 |
| Q9Y5M8 | Signal recognition particle receptor subunit beta                                                               | 1.18 | NA    | NA      | 2  | 7.7  |
| Q9NQC3 | Reticulon-4                                                                                                     | 1.18 | NA    | NA      | 2  | 2.3  |
| P36578 | 60S ribosomal protein L4                                                                                        | 1.18 | 0.160 | 2.2E-01 | 4  | 9.8  |
| Q6P2Q9 | Pre-mRNA-processing-splicing factor 8                                                                           | 1.17 | 0.177 | 3.7E-01 | 3  | 1.3  |
| P49748 | Very long-chain specific acyl-CoA dehydrogenase, mitochondrial                                                  | 1.17 | 0.125 | 1.5E-01 | 6  | 9.2  |
| P26038 | Moesin                                                                                                          | 1.17 | 1.216 | 2.6E-01 | 6  | 9.5  |
| Q92841 | Probable ATP-dependent RNA helicase DDX17                                                                       | 1.17 | 0.156 | 3.4E-01 | 4  | 6.4  |
| P62913 | 60S ribosomal protein L11                                                                                       | 1.17 | NA    | NA      | 2  | 9.0  |
| P62424 | 60S ribosomal protein L7a                                                                                       | 1.17 | NA    | NA      | 2  | 6.4  |
| Q02252 | Methylmalonate-semialdehyde dehydrogenase [acylating], mitochondrial                                            | 1.16 | 0.205 | 4.9E-01 | 3  | 5.8  |
| P42765 | 3-ketoacyl-CoA thiolase, mitochondrial                                                                          | 1.16 | 1.442 | 3.7E-01 | 5  | 16.6 |
| O43678 | NADH dehydrogenase [ubiquinone] 1 alpha subcomplex subunit 2                                                    | 1.16 | 0.504 | 7.6E-01 | 3  | 20.2 |
| O75489 | NADH dehydrogenase [ubiquinone] iron-sulfur protein 3, mitochondrial                                            | 1.16 | 0.136 | 1.7E-01 | 4  | 14.4 |
| P02768 | Serum albumin                                                                                                   | 1.16 | 0.133 | 1.4E-02 | 33 | 52.9 |

Table S7-Sample UM20

|        |                                                                                                          |      |        |         |    |      |
|--------|----------------------------------------------------------------------------------------------------------|------|--------|---------|----|------|
| Q12797 | Aspartyl/asparaginyl beta-hydroxylase                                                                    | 1.15 | 0.917  | 3.1E-01 | 6  | 7.4  |
| P30050 | 60S ribosomal protein L12                                                                                | 1.15 | NA     | NA      | 2  | 17.0 |
| P30048 | Thioredoxin-dependent peroxide reductase, mitochondrial                                                  | 1.15 | 0.420  | 5.2E-01 | 5  | 18.0 |
| P24539 | ATP synthase F(0) complex subunit B1, mitochondrial                                                      | 1.15 | NA     | NA      | 2  | 9.0  |
| Q9C0E8 | Protein lunapark                                                                                         | 1.15 | NA     | NA      | 2  | 3.7  |
| P11586 | C-1-tetrahydrofolate synthase, cytoplasmic                                                               | 1.15 | 0.066  | 2.6E-02 | 6  | 7.3  |
| P31153 | S-adenosylmethionine synthase isoform type-2                                                             | 1.14 | NA     | NA      | 2  | 5.6  |
| P24534 | Elongation factor 1-beta                                                                                 | 1.13 | NA     | NA      | 2  | 7.1  |
| Q9BR76 | Coronin-1B                                                                                               | 1.13 | NA     | NA      | 2  | 4.1  |
| Q7Z6Z7 | E3 ubiquitin-protein ligase HUWE1                                                                        | 1.13 | NA     | NA      | 2  | 0.5  |
| P62805 | Histone H4                                                                                               | 1.13 | 0.359  | 5.6E-02 | 7  | 52.4 |
| P31949 | Protein S100-A11                                                                                         | 1.12 | 0.529  | 8.0E-01 | 3  | 34.3 |
| P45880 | Voltage-dependent anion-selective channel protein 2                                                      | 1.12 | 0.167  | 3.7E-01 | 6  | 21.8 |
| P51798 | H(+)/Cl(-) exchange transporter 7                                                                        | 1.12 | 0.485  | 8.7E-01 | 3  | 5.7  |
| P01859 | Ig gamma-2 chain C region                                                                                | 1.12 | NA     | NA      | 2  | 6.7  |
| P08237 | ATP-dependent 6-phosphofructokinase, muscle type                                                         | 1.12 | 0.194  | 5.7E-01 | 3  | 4.2  |
| P11177 | Pyruvate dehydrogenase E1 component subunit beta, mitochondrial                                          | 1.12 | 0.923  | 4.1E-01 | 3  | 8.6  |
| P39656 | Dolichyl-diphosphooligosaccharide--protein glycosyltransferase 48 kDa subunit                            | 1.12 | 0.167  | 1.6E-01 | 6  | 12.9 |
| Q92945 | Far upstream element-binding protein 2                                                                   | 1.11 | 0.116  | 5.8E-01 | 5  | 8.0  |
| P30042 | ES1 protein homolog, mitochondrial                                                                       | 1.11 | NA     | NA      | 2  | 8.6  |
| P09622 | Dihydrolipoyl dehydrogenase, mitochondrial                                                               | 1.10 | 1.871  | 4.5E-01 | 5  | 10.6 |
| P22307 | Non-specific lipid-transfer protein                                                                      | 1.10 | NA     | NA      | 2  | 3.1  |
| Q9Y230 | RuvB-like 2                                                                                              | 1.10 | NA     | NA      | 2  | 5.0  |
| Q13423 | NAD(P) transhydrogenase, mitochondrial                                                                   | 1.10 | 0.288  | 5.8E-01 | 7  | 6.8  |
| O15523 | ATP-dependent RNA helicase DDX3Y                                                                         | 1.10 | NA     | NA      | 2  | 2.4  |
| P49755 | Transmembrane emp24 domain-containing protein 10                                                         | 1.10 | NA     | NA      | 2  | 9.6  |
| P62258 | 14-3-3 protein epsilon                                                                                   | 1.10 | 0.252  | 7.8E-01 | 7  | 26.7 |
| P34932 | Heat shock 70 kDa protein 4                                                                              | 1.09 | 0.253  | 5.1E-01 | 4  | 4.2  |
| P02787 | Serotransferrin                                                                                          | 1.09 | 0.304  | 4.8E-01 | 6  | 8.5  |
| Q14258 | E3 ubiquitin/ISG15 ligase TRIM25                                                                         | 1.09 | NA     | NA      | 2  | 3.8  |
| P29966 | Myristoylated alanine-rich C-kinase substrate                                                            | 1.09 | 1.159  | 6.2E-01 | 3  | 12.3 |
| Q99714 | 3-hydroxyacyl-CoA dehydrogenase type-2                                                                   | 1.09 | 0.081  | 3.6E-01 | 3  | 16.5 |
| P62269 | 40S ribosomal protein S18                                                                                | 1.09 | 0.301  | 3.8E-01 | 5  | 23.7 |
| P09525 | Annexin A4                                                                                               | 1.09 | 0.249  | 5.0E-01 | 5  | 12.9 |
| Q9Y4L1 | Hypoxia up-regulated protein 1                                                                           | 1.08 | 0.484  | 8.8E-01 | 3  | 3.7  |
| P61026 | Ras-related protein Rab-10                                                                               | 1.08 | NA     | NA      | 2  | 9.5  |
| P31930 | Cytochrome b-c1 complex subunit 1, mitochondrial                                                         | 1.08 | 0.278  | 7.1E-01 | 4  | 9.8  |
| P10515 | Dihydrolipoyllysine-residue acetyltransferase component of pyruvate dehydrogenase complex, mitochondrial | 1.07 | 0.044  | 2.5E-01 | 5  | 6.5  |
| Q8WUD1 | Ras-related protein Rab-2B                                                                               | 1.07 | NA     | NA      | 2  | 11.1 |
| P30153 | Serine/threonine-protein phosphatase 2A 65 kDa regulatory subunit A alpha isoform                        | 1.07 | 0.357  | 8.0E-01 | 3  | 7.0  |
| P62987 | Ubiquitin-60S ribosomal protein L40                                                                      | 1.06 | 0.422  | 4.9E-01 | 7  | 46.1 |
| P14625 | Endoplasmic                                                                                              | 1.06 | 0.409  | 3.8E-01 | 14 | 17.7 |
| P18077 | 60S ribosomal protein L35a                                                                               | 1.06 | NA     | NA      | 2  | 11.8 |
| P30740 | Leukocyte elastase inhibitor                                                                             | 1.06 | NA     | NA      | 2  | 7.7  |
| P15880 | 40S ribosomal protein S2                                                                                 | 1.06 | 0.541  | 7.1E-01 | 4  | 16.0 |
| O60313 | Dynamin-like 120 kDa protein, mitochondrial                                                              | 1.06 | 0.942  | 7.8E-01 | 4  | 4.7  |
| Q03252 | Lamin-B2                                                                                                 | 1.06 | 1.821  | 2.4E-01 | 16 | 23.5 |
| O75947 | ATP synthase subunit d, mitochondrial                                                                    | 1.05 | 0.280  | 8.4E-01 | 5  | 28.6 |
| P30084 | Enoyl-CoA hydratase, mitochondrial                                                                       | 1.05 | NA     | NA      | 2  | 4.5  |
| Q9BRX8 | Redox-regulatory protein FAM213A                                                                         | 1.05 | 0.288  | 8.4E-01 | 3  | 13.1 |
| Q9HCC0 | Methylcrotonoyl-CoA carboxylase beta chain, mitochondrial                                                | 1.05 | NA     | NA      | 2  | 6.0  |
| O95298 | NADH dehydrogenase [ubiquinone] 1 subunit C2                                                             | 1.04 | NA     | NA      | 2  | 16.8 |
| P11940 | Polyadenylate-binding protein 1                                                                          | 1.04 | 0.438  | 5.1E-01 | 5  | 9.9  |
| P54136 | Arginine--tRNA ligase, cytoplasmic                                                                       | 1.03 | 1.195  | 9.1E-01 | 3  | 5.5  |
| P00367 | Glutamate dehydrogenase 1, mitochondrial                                                                 | 1.03 | 0.588  | 6.8E-01 | 6  | 12.5 |
| Q969X5 | Endoplasmic reticulum-Golgi intermediate compartment protein 1                                           | 1.03 | 0.736  | 7.4E-01 | 4  | 14.1 |
| P54920 | Alpha-soluble NSF attachment protein                                                                     | 1.03 | 0.271  | 8.3E-01 | 6  | 22.7 |
| Q14789 | Golgin subfamily B member 1                                                                              | 1.03 | 0.711  | 7.9E-01 | 3  | 1.4  |
| O94919 | Endonuclease domain-containing 1 protein                                                                 | 1.03 | 0.290  | 7.4E-01 | 4  | 8.6  |
| P61586 | Transforming protein RhoA                                                                                | 1.03 | 0.155  | 7.9E-01 | 3  | 10.4 |
| P06703 | Protein S100-A6                                                                                          | 1.03 | NA     | NA      | 2  | 16.7 |
| Q9P2R7 | Succinyl-CoA ligase [ADP-forming] subunit beta, mitochondrial                                            | 1.03 | NA     | NA      | 2  | 3.9  |
| P01889 | HLA class I histocompatibility antigen, B-7 alpha chain                                                  | 1.01 | NA     | NA      | 2  | 9.4  |
| P78371 | T-complex protein 1 subunit beta                                                                         | 1.01 | 1.712  | 9.3E-01 | 5  | 12.0 |
| P29692 | Elongation factor 1-delta                                                                                | 1.01 | 0.308  | 9.7E-01 | 3  | 8.5  |
| P14927 | Cytochrome b-c1 complex subunit 7                                                                        | 1.01 | NA     | NA      | 2  | 22.5 |
| Q96QK1 | Vacuolar protein sorting-associated protein 35                                                           | 1.01 | NA     | NA      | 2  | 3.0  |
| P0C0S5 | Histone H2A.Z                                                                                            | 1.00 | NA     | NA      | 2  | 18.8 |
| P67936 | Tropomyosin alpha-4 chain                                                                                | 1.00 | 0.549  | 9.9E-01 | 8  | 25.0 |
| P60953 | Cell division control protein 42 homolog                                                                 | 1.00 | NA     | NA      | 2  | 11.0 |
| Q05682 | Caldesmon                                                                                                | 0.99 | 1.895  | 9.9E-01 | 3  | 6.4  |
| O60763 | General vesicular transport factor p115                                                                  | 0.99 | NA     | NA      | 2  | 1.6  |
| P01876 | Ig alpha-1 chain C region                                                                                | 0.99 | NA     | NA      | 2  | 4.5  |
| Q9BSJ8 | Extended synaptotagmin-1                                                                                 | 0.99 | 0.310  | 9.4E-01 | 4  | 4.4  |
| Q96JJ7 | Protein disulfide-isomerase TMX3                                                                         | 0.99 | NA     | NA      | 2  | 6.8  |
| P18124 | 60S ribosomal protein L7                                                                                 | 0.98 | 1.707  | 6.5E-01 | 5  | 15.7 |
| Q6DD88 | Atlastin-3                                                                                               | 0.98 | 0.214  | 8.7E-01 | 4  | 7.4  |
| P13667 | Protein disulfide-isomerase A4                                                                           | 0.98 | 0.451  | 7.2E-01 | 5  | 7.9  |
| P06737 | Glycogen phosphorylase, liver form                                                                       | 0.97 | 0.176  | 7.2E-01 | 5  | 6.4  |
| P05388 | 60S acidic ribosomal protein P0                                                                          | 0.97 | NA     | NA      | 2  | 6.6  |
| O95302 | Peptidyl-prolyl cis-trans isomerase FKBP9                                                                | 0.97 | NA     | NA      | 2  | 4.0  |
| P63000 | Ras-related C3 botulinum toxin substrate 1                                                               | 0.96 | 1.729  | 6.8E-01 | 4  | 24.5 |
| P61006 | Ras-related protein Rab-8A                                                                               | 0.96 | NA     | NA      | 2  | 7.2  |
| O75340 | Programmed cell death protein 6                                                                          | 0.96 | 1.551  | 9.4E-01 | 3  | 11.5 |
| P09874 | Poly [ADP-ribose] polymerase 1                                                                           | 0.95 | 0.137  | 5.3E-01 | 4  | 4.4  |
| Q00325 | Phosphate carrier protein, mitochondrial                                                                 | 0.95 | 0.355  | 7.8E-01 | 5  | 13.5 |
| P51812 | Ribosomal protein S6 kinase alpha-3                                                                      | 0.95 | NA     | NA      | 2  | 2.3  |
| P62701 | 40S ribosomal protein S4, X isoform                                                                      | 0.94 | 0.380  | 7.6E-01 | 4  | 13.3 |
| P23396 | 40S ribosomal protein S3                                                                                 | 0.94 | 0.196  | 6.0E-01 | 5  | 19.3 |
| Q8IUX7 | Adipocyte enhancer-binding protein 1                                                                     | 0.94 | 0.064  | 2.6E-01 | 3  | 4.2  |
| P62917 | 60S ribosomal protein L8                                                                                 | 0.94 | NA     | NA      | 2  | 10.5 |
| P46781 | 40S ribosomal protein S9                                                                                 | 0.94 | 34.152 | 7.6E-01 | 4  | 14.9 |
| Q9UHG3 | Prenylcysteine oxidase 1                                                                                 | 0.93 | 0.115  | 5.9E-01 | 3  | 6.3  |
| Q9Y5X3 | Sorting nexin-5                                                                                          | 0.93 | NA     | NA      | 2  | 3.7  |
| P47756 | F-actin-capping protein subunit beta                                                                     | 0.93 | 0.875  | 5.7E-01 | 3  | 12.6 |
| O75521 | Enoyl-CoA delta isomerase 2, mitochondrial                                                               | 0.92 | NA     | NA      | 2  | 5.6  |
| P26196 | Probable ATP-dependent RNA helicase DDX6                                                                 | 0.92 | NA     | NA      | 2  | 4.1  |
| Q9H444 | Charged multivesicular body protein 4b                                                                   | 0.92 | NA     | NA      | 2  | 8.0  |
| P62753 | 40S ribosomal protein S6                                                                                 | 0.92 | 0.549  | 5.5E-01 | 4  | 15.7 |
| Q00577 | Transcriptional activator protein Pur-alpha                                                              | 0.91 | NA     | NA      | 2  | 4.7  |
| P40429 | 60S ribosomal protein L13a                                                                               | 0.91 | NA     | NA      | 2  | 9.9  |
| Q02218 | 2-oxoglutarate dehydrogenase, mitochondrial                                                              | 0.91 | 0.122  | 2.9E-01 | 5  | 5.3  |
| P29590 | Protein PML                                                                                              | 0.91 | 3.227  | 5.2E-01 | 3  | 4.3  |
| P49368 | T-complex protein 1 subunit gamma                                                                        | 0.91 | 0.136  | 2.0E-01 | 7  | 12.1 |
| P04040 | Catalase                                                                                                 | 0.91 | 0.386  | 7.6E-01 | 4  | 9.5  |
| P62244 | 40S ribosomal protein S15a                                                                               | 0.91 | 0.096  | 3.3E-01 | 4  | 29.2 |
| Q9UNH7 | Sorting nexin-6                                                                                          | 0.90 | 0.240  | 4.8E-01 | 3  | 4.7  |

Table S7-Sample UM20

|        |                                                                                |      |        |         |    |      |
|--------|--------------------------------------------------------------------------------|------|--------|---------|----|------|
| Q7KZF4 | Staphylococcal nuclease domain-containing protein 1                            | 0.90 | 0.811  | 7.2E-01 | 3  | 5.4  |
| P02790 | Hemopexin                                                                      | 0.90 | 1.570  | 8.3E-01 | 3  | 8.9  |
| Q14764 | Major vault protein                                                            | 0.90 | 0.151  | 2.4E-01 | 4  | 4.7  |
| P35573 | Glycogen debranching enzyme                                                    | 0.90 | NA     | NA      | 2  | 2.1  |
| F47897 | Glutamine-tRNA ligase                                                          | 0.89 | NA     | NA      | 2  | 2.6  |
| P46939 | Utrophin                                                                       | 0.88 | 0.105  | 1.8E-01 | 4  | 1.8  |
| O94906 | Pre-mRNA-processing factor 6                                                   | 0.88 | NA     | NA      | 2  | 2.1  |
| Q16795 | NADH dehydrogenase [ubiquinone] 1 alpha subcomplex subunit 9, mitochondrial    | 0.88 | 0.223  | 5.4E-01 | 3  | 9.8  |
| Q04637 | Eukaryotic translation initiation factor 4 gamma 1                             | 0.87 | NA     | NA      | 2  | 1.1  |
| Q15365 | Poly(rC)-binding protein 1                                                     | 0.87 | NA     | NA      | 2  | 5.3  |
| P12235 | ADP/ATP translocase 1                                                          | 0.87 | NA     | NA      | 2  | 6.7  |
| P15586 | N-acetylglucosamine-6-sulfatase                                                | 0.87 | NA     | NA      | 2  | 3.3  |
| P14868 | Aspartate-tRNA ligase, cytoplasmic                                             | 0.86 | 1.111  | 4.3E-01 | 4  | 9.8  |
| P48643 | T-complex protein 1 subunit epsilon                                            | 0.86 | 0.104  | 1.1E-01 | 6  | 9.8  |
| P27361 | Mitogen-activated protein kinase 3                                             | 0.86 | 0.553  | 6.7E-01 | 3  | 9.8  |
| P26368 | Splicing factor U2AF 65 kDa subunit                                            | 0.86 | NA     | NA      | 2  | 3.8  |
| Q6NZI2 | Polymerase I and transcript release factor                                     | 0.86 | 0.181  | 4.5E-01 | 7  | 19.5 |
| F37837 | Transaldolase                                                                  | 0.86 | NA     | NA      | 2  | 4.2  |
| O75746 | Calcium-binding mitochondrial carrier protein Aralar1                          | 0.86 | NA     | NA      | 2  | 4.6  |
| F55072 | Transitional endoplasmic reticulum ATPase                                      | 0.84 | 0.054  | 6.9E-04 | 11 | 15.9 |
| Q92499 | ATP-dependent RNA helicase DDX1                                                | 0.84 | 0.102  | 7.1E-02 | 3  | 3.9  |
| Q93009 | Ubiquitin carboxyl-terminal hydrolase 7                                        | 0.84 | NA     | NA      | 2  | 1.8  |
| Q27J81 | Inverted formin-2                                                              | 0.84 | NA     | NA      | 2  | 1.6  |
| Q9UHD8 | Septin-9                                                                       | 0.84 | 0.097  | 6.0E-02 | 4  | 7.8  |
| Q6NUK1 | Calcium-binding mitochondrial carrier protein SCaMC-1                          | 0.84 | NA     | NA      | 2  | 4.4  |
| P43490 | Nicotinamide phosphoribosyltransferase                                         | 0.83 | NA     | NA      | 2  | 3.1  |
| P06753 | Tropomyosin alpha-3 chain                                                      | 0.83 | 2.099  | 4.4E-01 | 4  | 13.0 |
| Q9Y4G6 | Talin-2                                                                        | 0.83 | NA     | NA      | 2  | 1.3  |
| Q99733 | Nucleosome assembly protein 1-like 4                                           | 0.83 | NA     | NA      | 2  | 3.5  |
| F48735 | Isocitrate dehydrogenase [NADP], mitochondrial                                 | 0.83 | 0.098  | 2.2E-01 | 4  | 10.6 |
| Q7L5N1 | COP9 signalosome complex subunit 6                                             | 0.82 | 0.168  | 2.4E-01 | 3  | 10.1 |
| P50990 | T-complex protein 1 subunit theta                                              | 0.82 | 0.040  | 4.2E-03 | 6  | 10.4 |
| P08559 | Pyruvate dehydrogenase E1 component subunit alpha, somatic form, mitochondrial | 0.82 | 26.290 | 5.5E-01 | 3  | 8.2  |
| O15212 | Prefoldin subunit 6                                                            | 0.82 | NA     | NA      | 2  | 14.0 |
| F50991 | T-complex protein 1 subunit delta                                              | 0.82 | 0.068  | 3.1E-02 | 4  | 9.3  |
| Q14152 | Eukaryotic translation initiation factor 3 subunit A                           | 0.82 | NA     | NA      | 2  | 2.2  |
| Q9Y305 | Acyl-coenzyme A thioesterase 9, mitochondrial                                  | 0.81 | NA     | NA      | 2  | 5.5  |
| B5ME19 | Eukaryotic translation initiation factor 3 subunit C-like protein              | 0.81 | 0.126  | 1.8E-01 | 3  | 3.1  |
| Q9Y6N5 | Sulfide:quinone oxidoreductase, mitochondrial                                  | 0.81 | 0.176  | 2.5E-01 | 5  | 10.7 |
| P54709 | Sodium/potassium-transporting ATPase subunit beta-3                            | 0.81 | 6.700  | 5.6E-01 | 3  | 11.8 |
| Q9NTZ6 | RNA-binding protein 12                                                         | 0.81 | NA     | NA      | 2  | 3.3  |
| F52907 | F-actin-capping protein subunit alpha-1                                        | 0.81 | NA     | NA      | 2  | 10.5 |
| Q8NFI4 | Putative protein FAM10A5                                                       | 0.80 | NA     | NA      | 2  | 5.1  |
| P05556 | Integrin beta-1                                                                | 0.80 | 0.092  | 1.3E-02 | 6  | 8.0  |
| Q13200 | 26S proteasome non-ATPase regulatory subunit 2                                 | 0.80 | 0.154  | 2.1E-01 | 4  | 4.2  |
| Q9Y2J2 | Band 4.1-like protein 3                                                        | 0.80 | NA     | NA      | 2  | 3.1  |
| P49593 | Protein phosphatase 1F                                                         | 0.79 | NA     | NA      | 2  | 7.5  |
| P08107 | Heat shock 70 kDa protein 1A/1B                                                | 0.79 | 0.044  | 7.7E-03 | 11 | 17.9 |
| P02652 | Apolipoprotein A-II                                                            | 0.78 | NA     | NA      | 2  | 11.0 |
| Q9Y5S2 | Serine/threonine-protein kinase MRCK beta                                      | 0.78 | 0.206  | 2.7E-01 | 3  | 1.7  |
| Q99832 | T-complex protein 1 subunit eta                                                | 0.77 | 0.050  | 5.8E-03 | 5  | 10.5 |
| P09496 | Clathrin light chain A                                                         | 0.77 | NA     | NA      | 2  | 5.6  |
| Q07065 | Cytoskeleton-associated protein 4                                              | 0.76 | 0.079  | 3.5E-03 | 6  | 13.1 |
| P16615 | Sarcoplasmic/endoplasmic reticulum calcium ATPase 2                            | 0.76 | 0.103  | 4.0E-02 | 7  | 7.4  |
| Q15149 | Plectin                                                                        | 0.75 | 0.031  | 8.0E-12 | 52 | 11.8 |
| P05091 | Aldehyde dehydrogenase, mitochondrial                                          | 0.75 | 0.030  | 2.7E-04 | 3  | 6.2  |
| P40227 | T-complex protein 1 subunit zeta                                               | 0.75 | NA     | NA      | 2  | 3.8  |
| P42025 | Beta-centractin                                                                | 0.74 | NA     | NA      | 2  | 5.1  |
| F50995 | Annexin A11                                                                    | 0.74 | 0.114  | 5.6E-02 | 5  | 9.5  |
| P35221 | Catenin alpha-1                                                                | 0.74 | 0.131  | 9.0E-02 | 4  | 5.5  |
| P17987 | T-complex protein 1 subunit alpha                                              | 0.74 | 0.034  | 1.3E-03 | 5  | 9.7  |
| Q9HBL0 | Tensin-1                                                                       | 0.74 | 7.343  | 6.1E-01 | 5  | 5.0  |
| Q9NZ45 | CDGSH iron-sulfur domain-containing protein 1                                  | 0.73 | 0.086  | 5.5E-02 | 3  | 29.6 |
| Q16851 | UTP-glucose-1-phosphate uridylyltransferase                                    | 0.73 | NA     | NA      | 2  | 4.5  |
| O43707 | Alpha-actinin-4                                                                | 0.73 | 0.085  | 2.7E-03 | 13 | 16.4 |
| P05023 | Sodium/potassium-transporting ATPase subunit alpha-1                           | 0.73 | 0.038  | 7.1E-05 | 17 | 18.3 |
| O94979 | Protein transport protein Sec31A                                               | 0.72 | 0.136  | 1.2E-01 | 3  | 3.4  |
| P60709 | Actin, cytoplasmic 1                                                           | 0.72 | 0.075  | 1.5E-02 | 6  | 24.8 |
| Q63ZY3 | KN motif and ankyrin repeat domain-containing protein 2                        | 0.71 | 1.079  | 4.7E-01 | 3  | 5.2  |
| O94905 | Erlin-2                                                                        | 0.71 | 0.082  | 1.4E-03 | 5  | 11.8 |
| O95865 | N(G),N(G)-dimethylarginine dimethylaminohydrolase 2                            | 0.71 | 0.081  | 4.0E-02 | 3  | 11.9 |
| P17655 | Calpain-2 catalytic subunit                                                    | 0.71 | NA     | NA      | 2  | 3.6  |
| P00387 | NADH-cytochrome b5 reductase 3                                                 | 0.71 | 0.118  | 1.1E-02 | 6  | 20.6 |
| Q9Y6G9 | Cytoplasmic dynein 1 light intermediate chain 1                                | 0.71 | NA     | NA      | 2  | 4.2  |
| Q06830 | Peroxiredoxin-1                                                                | 0.71 | 0.104  | 5.5E-03 | 7  | 33.2 |
| F43307 | Translocon-associated protein subunit alpha                                    | 0.70 | NA     | NA      | 2  | 6.6  |
| F46937 | Yorkie homolog                                                                 | 0.70 | NA     | NA      | 2  | 6.7  |
| P69905 | Hemoglobin subunit alpha                                                       | 0.70 | 0.122  | 6.6E-03 | 5  | 34.5 |
| Q14558 | Phosphoribosyl pyrophosphate synthase-associated protein 1                     | 0.70 | NA     | NA      | 2  | 8.4  |
| Q9Y6C2 | EMILIN-1                                                                       | 0.69 | 0.096  | 3.7E-03 | 8  | 9.2  |
| O95782 | AP-2 complex subunit alpha-1                                                   | 0.68 | NA     | NA      | 2  | 1.8  |
| P09497 | Clathrin light chain B                                                         | 0.68 | NA     | NA      | 2  | 7.4  |
| P35222 | Catenin beta-1                                                                 | 0.68 | 0.046  | 1.6E-02 | 5  | 7.4  |
| O14735 | CDP-diacylglycerol-inositol 3-phosphatidyltransferase                          | 0.68 | NA     | NA      | 2  | 9.9  |
| O60716 | Catenin delta-1                                                                | 0.68 | NA     | NA      | 2  | 2.0  |
| Q9NZN4 | EH domain-containing protein 2                                                 | 0.67 | 0.080  | 8.9E-03 | 3  | 5.7  |
| P13861 | cAMP-dependent protein kinase type II-alpha regulatory subunit                 | 0.67 | 0.078  | 5.6E-02 | 4  | 13.6 |
| Q14203 | Dynactin subunit 1                                                             | 0.67 | 0.027  | 5.2E-03 | 4  | 4.2  |
| O43301 | Heat shock 70 kDa protein 12A                                                  | 0.66 | 0.181  | 4.8E-02 | 3  | 5.5  |
| Q15293 | Reticulocalbin-1                                                               | 0.66 | NA     | NA      | 2  | 4.5  |
| Q9BTV4 | Transmembrane protein 43                                                       | 0.65 | 0.250  | 7.7E-02 | 4  | 11.5 |
| P49458 | Signal recognition particle 9 kDa protein                                      | 0.65 | NA     | NA      | 2  | 22.1 |
| Q9Y3I0 | tRNA-splicing ligase RtcB homolog                                              | 0.64 | NA     | NA      | 2  | 4.6  |
| Q43242 | 26S proteasome non-ATPase regulatory subunit 3                                 | 0.64 | NA     | NA      | 2  | 2.8  |
| Q8IVF2 | Protein AHNAK2                                                                 | 0.64 | 2.199  | 8.0E-01 | 3  | 0.3  |
| Q02952 | A-kinase anchor protein 12                                                     | 0.64 | 0.190  | 1.7E-02 | 19 | 13.9 |
| P53621 | Coatomer subunit alpha                                                         | 0.63 | 0.260  | 2.5E-01 | 3  | 3.5  |
| P18206 | Vinculin                                                                       | 0.62 | 0.045  | 5.8E-07 | 14 | 15.3 |
| P31942 | Heterogeneous nuclear ribonucleoprotein H3                                     | 0.61 | NA     | NA      | 2  | 8.4  |
| P05026 | Sodium/potassium-transporting ATPase subunit beta-1                            | 0.61 | NA     | NA      | 2  | 5.9  |
| P02042 | Hemoglobin subunit delta                                                       | 0.61 | NA     | NA      | 2  | 17.7 |
| P11532 | Dystrophin                                                                     | 0.61 | NA     | NA      | 2  | 0.6  |
| P04179 | Superoxide dismutase [Mn], mitochondrial                                       | 0.60 | 0.083  | 2.7E-03 | 4  | 14.0 |
| Q01484 | Ankyrin-2                                                                      | 0.60 | NA     | NA      | 2  | 0.5  |
| P43121 | Cell surface glycoprotein MUC18                                                | 0.60 | NA     | NA      | 2  | 3.4  |
| P17612 | cAMP-dependent protein kinase catalytic subunit alpha                          | 0.60 | 0.131  | 2.6E-02 | 3  | 6.8  |
| P12814 | Alpha-actinin-1                                                                | 0.58 | 0.082  | 4.9E-05 | 7  | 10.1 |

Table S7-Sample UM20

|        |                                                                  |      |       |         |    |      |
|--------|------------------------------------------------------------------|------|-------|---------|----|------|
| Q14204 | Cytoplasmic dynein 1 heavy chain 1                               | 0.58 | 0.052 | 1.8E-07 | 19 | 4.4  |
| P32119 | Peroxisiredoxin-2                                                | 0.58 | 0.083 | 1.4E-04 | 4  | 14.1 |
| O94832 | Unconventional myosin-Id                                         | 0.58 | NA    | NA      | 2  | 1.9  |
| Q13561 | Dynactin subunit 2                                               | 0.58 | 0.080 | 8.5E-02 | 4  | 11.7 |
| P63208 | S-phase kinase-associated protein 1                              | 0.58 | NA    | NA      | 2  | 13.5 |
| Q00610 | Clathrin heavy chain 1                                           | 0.57 | 0.052 | 7.7E-08 | 18 | 11.8 |
| P01009 | Alpha-1-antitrypsin                                              | 0.57 | 0.238 | 1.5E-02 | 8  | 17.5 |
| Q9BQE3 | Tubulin alpha-1C chain                                           | 0.56 | NA    | NA      | 2  | 6.7  |
| Q14254 | Flotillin-2                                                      | 0.56 | NA    | NA      | 2  | 4.2  |
| O75131 | Copine-3                                                         | 0.55 | 0.024 | 1.6E-06 | 4  | 6.7  |
| Q15942 | Zyxin                                                            | 0.55 | NA    | NA      | 2  | 5.2  |
| Q14956 | Transmembrane glycoprotein NMB                                   | 0.54 | 0.363 | 8.2E-02 | 3  | 5.8  |
| P51659 | Peroxisomal multifunctional enzyme type 2                        | 0.54 | NA    | NA      | 2  | 3.0  |
| P55884 | Eukaryotic translation initiation factor 3 subunit B             | 0.54 | 0.161 | 3.8E-02 | 3  | 3.3  |
| P04083 | Annexin A1                                                       | 0.54 | 0.076 | 9.0E-09 | 13 | 40.8 |
| Q16181 | Septin-7                                                         | 0.53 | 0.034 | 2.0E-06 | 4  | 9.4  |
| P23634 | Plasma membrane calcium-transporting ATPase 4                    | 0.53 | 0.060 | 3.6E-03 | 3  | 4.0  |
| P35580 | Myosin-10                                                        | 0.53 | 0.097 | 1.0E-04 | 11 | 6.7  |
| P04899 | Guanine nucleotide-binding protein G(i) subunit alpha-2          | 0.52 | 0.200 | 2.6E-02 | 4  | 13.8 |
| Q9Y490 | Talin-1                                                          | 0.52 | 0.034 | 1.6E-11 | 20 | 9.7  |
| P04632 | Calpain small subunit 1                                          | 0.52 | 0.509 | 3.5E-01 | 3  | 8.6  |
| P04792 | Heat shock protein beta-1                                        | 0.52 | 0.056 | 1.8E-04 | 5  | 31.2 |
| P07360 | Complement component C8 gamma chain                              | 0.51 | NA    | NA      | 2  | 15.8 |
| P68371 | Tubulin beta-4B chain                                            | 0.51 | NA    | NA      | 2  | 7.2  |
| Q15019 | Septin-2                                                         | 0.51 | 0.098 | 6.4E-04 | 4  | 13.9 |
| Q13813 | Spectrin alpha chain, non-erythrocytic 1                         | 0.51 | 0.027 | 0.0E+00 | 65 | 27.5 |
| Q969G5 | Protein kinase C delta-binding protein                           | 0.50 | 0.223 | 2.8E-02 | 3  | 11.5 |
| Q13418 | Integrin-linked protein kinase                                   | 0.50 | NA    | NA      | 2  | 3.8  |
| Q14344 | Guanine nucleotide-binding protein subunit alpha-13              | 0.50 | 0.133 | 5.9E-03 | 4  | 11.1 |
| Q13884 | Beta-1-syntrophin                                                | 0.50 | NA    | NA      | 2  | 2.6  |
| P07358 | Complement component C8 beta chain                               | 0.49 | NA    | NA      | 2  | 3.4  |
| P02511 | Alpha-crystallin B chain                                         | 0.49 | 0.069 | 4.5E-05 | 5  | 30.9 |
| P06756 | Integrin alpha-V                                                 | 0.49 | NA    | NA      | 2  | 1.4  |
| P68871 | Hemoglobin subunit beta                                          | 0.49 | 0.082 | 3.5E-06 | 5  | 44.9 |
| P08133 | Annexin A6                                                       | 0.49 | 0.061 | 2.0E-13 | 25 | 42.8 |
| P04196 | Histidine-rich glycoprotein                                      | 0.48 | NA    | NA      | 2  | 3.6  |
| P00390 | Glutathione reductase, mitochondrial                             | 0.48 | NA    | NA      | 2  | 6.3  |
| P04217 | Alpha-1B-glycoprotein                                            | 0.48 | NA    | NA      | 2  | 4.8  |
| Q09666 | Neuroblast differentiation-associated protein AHNAK              | 0.48 | 0.039 | 7.2E-12 | 45 | 6.1  |
| P36405 | ADP-ribosylation factor-like protein 3                           | 0.47 | NA    | NA      | 2  | 16.5 |
| Q01082 | Spectrin beta chain, non-erythrocytic 1                          | 0.47 | 0.031 | 0.0E+00 | 42 | 20.1 |
| P21333 | Filamin-A                                                        | 0.47 | 0.036 | 5.9E-11 | 44 | 20.9 |
| Q9BUF5 | Tubulin beta-6 chain                                             | 0.46 | NA    | NA      | 2  | 4.3  |
| Q16363 | Laminin subunit alpha-4                                          | 0.41 | 0.270 | 9.8E-02 | 5  | 3.0  |
| O14950 | Myosin regulatory light chain 12B                                | 0.40 | NA    | NA      | 2  | 12.2 |
| O94911 | ATP-binding cassette sub-family A member 8                       | 0.40 | NA    | NA      | 2  | 1.2  |
| Q03591 | Complement factor H-related protein 1                            | 0.40 | NA    | NA      | 2  | 9.4  |
| P00738 | Haptoglobin                                                      | 0.39 | 0.108 | 8.4E-02 | 5  | 12.6 |
| P01911 | HLA class II histocompatibility antigen, DRB1-15 beta chain      | 0.38 | NA    | NA      | 2  | 6.4  |
| P60201 | Myelin proteolipid protein                                       | 0.37 | NA    | NA      | 2  | 5.4  |
| P63010 | AP-2 complex subunit beta                                        | 0.35 | NA    | NA      | 2  | 1.8  |
| Q15582 | Transforming growth factor-beta-induced protein ig-h3            | 0.33 | NA    | NA      | 2  | 3.4  |
| P0DJ18 | Serum amyloid A-1 protein                                        | 0.33 | NA    | NA      | 2  | 20.5 |
| P38269 | Gamma-glutamyltransferase 5                                      | 0.32 | NA    | NA      | 2  | 3.9  |
| Q9NZN3 | EH domain-containing protein 3                                   | 0.32 | NA    | NA      | 2  | 3.9  |
| Q9BS40 | Latexin                                                          | 0.32 | NA    | NA      | 2  | 12.2 |
| Q5JRA6 | Melanoma inhibitory activity protein 3                           | 0.28 | NA    | NA      | 2  | 1.2  |
| Q13642 | Four and a half LIM domains protein 1                            | 0.28 | NA    | NA      | 2  | 5.6  |
| P04216 | Thy-1 membrane glycoprotein                                      | 0.28 | NA    | NA      | 2  | 15.5 |
| P58166 | Inhibin beta E chain                                             | 0.28 | NA    | NA      | 2  | 6.6  |
| P23229 | Integrin alpha-6                                                 | 0.28 | NA    | NA      | 2  | 1.5  |
| Q14624 | Inter-alpha-trypsin inhibitor heavy chain H4                     | 0.26 | NA    | NA      | 2  | 1.9  |
| P13671 | Complement component C6                                          | 0.26 | NA    | NA      | 2  | 2.6  |
| P61764 | Syntaxin-binding protein 1                                       | 0.25 | NA    | NA      | 2  | 2.9  |
| O14495 | Lipid phosphate phosphohydrolase 3                               | 0.25 | NA    | NA      | 2  | 7.4  |
| P61626 | Lysozyme C                                                       | 0.24 | NA    | NA      | 2  | 12.8 |
| P22413 | Ectonucleotide pyrophosphatase/phosphodiesterase family member 1 | 0.24 | 0.402 | 1.2E-01 | 4  | 5.2  |
| P05164 | Myeloperoxidase                                                  | 0.22 | NA    | NA      | 2  | 2.7  |
| P43320 | Beta-crystallin B2                                               | 0.21 | NA    | NA      | 2  | 11.7 |
| P16452 | Erythrocyte membrane protein band 4.2                            | 0.21 | NA    | NA      | 2  | 2.7  |
| Q6UXB8 | Peptidase inhibitor 16                                           | 0.21 | NA    | NA      | 2  | 5.2  |
| P23946 | Chymase                                                          | 0.19 | NA    | NA      | 2  | 11.7 |
| P02760 | Protein AMBP                                                     | 0.18 | NA    | NA      | 2  | 7.7  |
| P10643 | Complement component C7                                          | 0.17 | NA    | NA      | 2  | 3.6  |
| P05186 | Alkaline phosphatase, tissue-nonspecific isozyme                 | 0.16 | 0.201 | 5.2E-02 | 4  | 7.8  |
| Q9NY15 | Stabilin-1                                                       | 0.16 | NA    | NA      | 2  | 0.6  |
| P26447 | Protein S100-A4                                                  | 0.16 | NA    | NA      | 2  | 18.8 |
| P24844 | Myosin regulatory light polypeptide 9                            | 0.15 | NA    | NA      | 2  | 12.2 |
| Q92777 | Synapsin-2                                                       | 0.14 | NA    | NA      | 2  | 4.1  |
| P02686 | Myelin basic protein                                             | 0.13 | NA    | NA      | 2  | 7.2  |
| Q9BXM0 | Periaxin                                                         | 0.12 | 0.303 | 1.6E-01 | 5  | 3.5  |
| P80723 | Brain acid soluble protein 1                                     | 0.12 | NA    | NA      | 2  | 11.9 |
| P08123 | Collagen alpha-2(I) chain                                        | 0.09 | NA    | NA      | 2  | 2.4  |
| O00159 | Unconventional myosin-1c                                         | 0.44 | 0.065 | 1.7E-06 | 7  | 7.2  |
| Q07954 | Prolow-density lipoprotein receptor-related protein 1            | 0.43 | 0.076 | 9.7E-04 | 8  | 2.5  |
| P00167 | Cytochrome b5                                                    | 0.41 | 0.043 | 5.4E-05 | 3  | 35.8 |
| P06727 | Apolipoprotein A-IV                                              | 0.40 | 0.079 | 2.3E-04 | 5  | 13.4 |
| P02647 | Apolipoprotein A-I                                               | 0.39 | 0.082 | 1.0E-03 | 5  | 18.7 |
| P09493 | Tropomyosin alpha-1 chain                                        | 0.39 | 0.212 | 1.6E-03 | 5  | 12.0 |
| P41219 | Peripherin                                                       | 0.39 | 0.229 | 4.8E-04 | 11 | 22.6 |
| O43491 | Band 4.1-like protein 2                                          | 0.38 | 0.094 | 1.8E-02 | 6  | 8.8  |
| O00468 | Agrin                                                            | 0.36 | 0.158 | 1.5E-02 | 3  | 1.8  |
| P60660 | Myosin light polypeptide 6                                       | 0.36 | 0.030 | 0.0E+00 | 8  | 58.3 |
| O15230 | Laminin subunit alpha-5                                          | 0.35 | 0.078 | 4.7E-05 | 12 | 4.2  |
| P55268 | Laminin subunit beta-2                                           | 0.35 | 0.071 | 2.5E-09 | 13 | 8.6  |
| O75369 | Filamin-B                                                        | 0.35 | 0.157 | 9.2E-03 | 8  | 4.5  |
| P62736 | Actin, aortic smooth muscle                                      | 0.35 | 0.146 | 3.1E-04 | 6  | 21.0 |
| P07099 | Epoxide hydrolase 1                                              | 0.34 | 0.182 | 3.7E-02 | 5  | 11.0 |
| P35579 | Myosin-9                                                         | 0.34 | 0.033 | 0.0E+00 | 48 | 24.7 |
| Q9NZM1 | Myoferlin                                                        | 0.34 | 0.066 | 3.7E-07 | 7  | 3.5  |
| P16157 | Ankyrin-1                                                        | 0.33 | 0.145 | 4.0E-03 | 3  | 1.9  |
| P12110 | Collagen alpha-2(VI) chain                                       | 0.33 | 0.190 | 2.0E-04 | 6  | 5.7  |
| P01903 | HLA class II histocompatibility antigen, DR alpha chain          | 0.33 | 0.139 | 1.5E-02 | 3  | 14.6 |
| P02679 | Fibrinogen gamma chain                                           | 0.33 | 0.127 | 1.1E-04 | 10 | 17.0 |
| P27105 | Erythrocyte band 7 integral membrane protein                     | 0.32 | 0.043 | 9.9E-07 | 5  | 15.6 |
| P46821 | Microtubule-associated protein 1B                                | 0.32 | 0.118 | 4.2E-03 | 4  | 1.7  |
| P09936 | Ubiquitin carboxyl-terminal hydrolase isozyme L1                 | 0.31 | 0.185 | 1.4E-02 | 4  | 21.5 |

Table S7-Sample UM20

|        |                                                                      |      |       |         |    |      |
|--------|----------------------------------------------------------------------|------|-------|---------|----|------|
| P00747 | Plasminogen                                                          | 0.30 | 0.129 | 2.1E-04 | 7  | 11.1 |
| O94875 | Sorbin and SH3 domain-containing protein 2                           | 0.30 | 0.233 | 2.5E-02 | 3  | 4.7  |
| P00450 | Ceruloplasmin                                                        | 0.30 | 0.082 | 9.7E-08 | 7  | 9.6  |
| P07197 | Neurofilament medium polypeptide                                     | 0.30 | 0.175 | 5.9E-03 | 4  | 6.6  |
| P07355 | Annexin A2                                                           | 0.30 | 0.049 | 0.0E+00 | 22 | 56.6 |
| P01011 | Alpha-1-antichymotrypsin                                             | 0.29 | 0.074 | 7.4E-08 | 8  | 16.5 |
| P02649 | Apolipoprotein E                                                     | 0.29 | 0.073 | 8.7E-07 | 13 | 40.1 |
| P07942 | Laminin subunit beta-1                                               | 0.29 | 0.163 | 3.9E-04 | 5  | 3.2  |
| P12111 | Collagen alpha-3(VI) chain                                           | 0.29 | 0.053 | 5.3E-13 | 27 | 9.7  |
| Q16555 | Dihydropyrimidinase-related protein 2                                | 0.29 | 0.065 | 1.4E-07 | 8  | 17.0 |
| P01024 | Complement C3                                                        | 0.29 | 0.143 | 5.4E-05 | 13 | 8.7  |
| Q05707 | Collagen alpha-1(XIV) chain                                          | 0.27 | 0.155 | 8.0E-04 | 7  | 4.1  |
| P11047 | Laminin subunit gamma-1                                              | 0.27 | 0.092 | 1.2E-06 | 10 | 6.6  |
| Q01995 | Transgelin                                                           | 0.27 | 0.131 | 1.2E-02 | 4  | 17.9 |
| P11166 | Solute carrier family 2, facilitated glucose transporter member 1    | 0.27 | 0.073 | 6.8E-07 | 3  | 5.5  |
| P02675 | Fibrinogen beta chain                                                | 0.27 | 0.051 | 1.4E-10 | 8  | 23.2 |
| P12109 | Collagen alpha-1(VI) chain                                           | 0.27 | 0.064 | 1.2E-09 | 9  | 9.5  |
| P98160 | Basement membrane-specific heparan sulfate proteoglycan core protein | 0.26 | 0.060 | 0.0E+00 | 27 | 8.0  |
| Q14112 | Nidogen-2                                                            | 0.26 | 0.103 | 1.2E-08 | 10 | 7.7  |
| P08572 | Collagen alpha-2(IV) chain                                           | 0.26 | 0.196 | 8.0E-04 | 5  | 3.7  |
| P02549 | Spectrin alpha chain, erythrocytic 1                                 | 0.25 | 0.113 | 3.0E-06 | 6  | 3.3  |
| P08294 | Extracellular superoxide dismutase [Cu-Zn]                           | 0.25 | 0.151 | 5.9E-03 | 3  | 15.4 |
| P50895 | Basal cell adhesion molecule                                         | 0.25 | 0.067 | 3.6E-03 | 3  | 7.0  |
| P02751 | Fibronectin                                                          | 0.23 | 0.090 | 2.6E-07 | 12 | 6.2  |
| P02671 | Fibrinogen alpha chain                                               | 0.22 | 0.088 | 1.2E-06 | 7  | 9.8  |
| Q2UY09 | Collagen alpha-1(XXVIII) chain                                       | 0.22 | 0.199 | 3.6E-03 | 3  | 2.8  |
| P14543 | Nidogen-1                                                            | 0.21 | 0.117 | 2.5E-05 | 8  | 7.4  |
| P60903 | Protein S100-A10                                                     | 0.21 | 0.135 | 3.7E-03 | 4  | 35.1 |
| P02749 | Beta-2-glycoprotein 1                                                | 0.20 | 0.100 | 2.2E-05 | 3  | 9.6  |
| Q14699 | Raftlin                                                              | 0.20 | 0.277 | 1.9E-02 | 3  | 5.5  |
| P02654 | Apolipoprotein C-I                                                   | 0.20 | 0.105 | 5.0E-05 | 3  | 24.1 |
| P04275 | von Willebrand factor                                                | 0.19 | 0.089 | 9.6E-11 | 11 | 4.4  |
| Q12805 | EGF-containing fibulin-like extracellular matrix protein 1           | 0.19 | 0.124 | 7.9E-04 | 3  | 5.7  |
| P39059 | Collagen alpha-1(XV) chain                                           | 0.19 | 0.108 | 4.5E-06 | 4  | 2.9  |
| P01871 | Ig mu chain C region                                                 | 0.19 | 0.177 | 5.8E-04 | 8  | 19.0 |
| P02730 | Band 3 anion transport protein                                       | 0.19 | 0.109 | 5.9E-05 | 6  | 8.6  |
| Q14195 | Dihydropyrimidinase-related protein 3                                | 0.18 | 0.135 | 1.3E-03 | 5  | 12.8 |
| P39060 | Collagen alpha-1(XVIII) chain                                        | 0.18 | 0.103 | 5.0E-08 | 7  | 4.2  |
| P35555 | Fibrillin-1                                                          | 0.18 | 0.032 | 0.0E+00 | 38 | 14.1 |
| P35749 | Myosin-11                                                            | 0.18 | 0.060 | 6.2E-15 | 27 | 14.5 |
| P11277 | Spectrin beta chain, erythrocytic                                    | 0.18 | 0.114 | 9.3E-03 | 5  | 3.3  |
| P07585 | Decorin                                                              | 0.17 | 0.095 | 1.5E-04 | 5  | 11.4 |
| P51888 | Prolargin                                                            | 0.17 | 0.066 | 0.0E+00 | 12 | 34.0 |
| P02743 | Serum amyloid P-component                                            | 0.17 | 0.106 | 8.7E-08 | 6  | 23.3 |
| P01008 | Antithrombin-III                                                     | 0.16 | 0.116 | 1.7E-05 | 5  | 11.4 |
| Q15661 | Tryptase alpha/beta-1                                                | 0.16 | 0.083 | 5.5E-05 | 5  | 21.8 |
| P20774 | Mimecan                                                              | 0.15 | 0.102 | 8.8E-13 | 8  | 28.2 |
| P02748 | Complement component C9                                              | 0.15 | 0.102 | 5.4E-06 | 8  | 13.8 |
| P22352 | Glutathione peroxidase 3                                             | 0.15 | 0.074 | 1.1E-09 | 4  | 14.6 |
| P21926 | CD9 antigen                                                          | 0.15 | 0.089 | 6.8E-07 | 3  | 9.6  |
| P35625 | Metalloproteinase inhibitor 3                                        | 0.15 | 0.061 | 4.7E-13 | 4  | 15.6 |
| P10909 | Clusterin                                                            | 0.15 | 0.050 | 0.0E+00 | 12 | 24.1 |
| P04004 | Vitronectin                                                          | 0.14 | 0.096 | 5.7E-11 | 8  | 16.1 |
| P10745 | Retinol-binding protein 3                                            | 0.14 | 0.233 | 2.4E-02 | 3  | 2.4  |
| P21980 | Protein-glutamine gamma-glutamyltransferase 2                        | 0.14 | 0.071 | 1.8E-12 | 12 | 16.7 |
| P01031 | Complement C5                                                        | 0.14 | 0.180 | 1.5E-05 | 3  | 1.6  |
| P15088 | Mast cell carboxypeptidase A                                         | 0.13 | 0.139 | 2.2E-03 | 4  | 7.9  |
| P22748 | Carbonic anhydrase 4                                                 | 0.13 | 0.106 | 6.2E-07 | 6  | 16.0 |
| P21810 | Biglycan                                                             | 0.12 | 0.097 | 3.9E-08 | 8  | 23.9 |
| P51884 | Lumican                                                              | 0.12 | 0.042 | 0.0E+00 | 7  | 20.4 |
| P25189 | Myelin protein P0                                                    | 0.11 | 0.084 | 1.8E-10 | 7  | 27.4 |

Brown denotes change  $\geq 2$  standard deviations (SD) from the mean, yellow denotes change  $\geq 1$  SD and green highlights p values  $\leq 0.05$ . NA, not applicable, n<3 unique peptides.
