# Supplementary material for: iTRAQ Quantitative Proteomic Comparison of Metastatic and Non-Metastatic Uveal Melanoma Tumors
Source: PubMed Central journal article supplement (PMC4549237; doi:10.1371/journal.pone.0135543), 2015-08-25
Supplement: pone.0135543.s008.pdf [file pone.0135543.s008.pdf]

## Supplementary Table S8

## Relative Protein Abundance: Sample UM23, Non-Metastatic

Total Proteins Quantified = 910; LogMedian Protein Ratio = 0.15; LogMean Protein Ratio = 0; Standard Deviation = 0.92

| Uni-Prot Accession | Protein                                                        | Ratio UM/Control | Standard Deviation | p value | Unique Peptides | % Sequence Coverage |
|--------------------|----------------------------------------------------------------|------------------|--------------------|---------|-----------------|---------------------|
| P62328             | Thymosin beta-4                                                | 9.78             | 0.297              | 1.0E-03 | 3               | 45.5                |
| P17096             | High mobility group protein HMG-I/HMG-Y                        | 9.49             | 0.151              | 9.7E-05 | 4               | 41.1                |
| P62937             | Peptidyl-prolyl cis-trans isomerase A                          | 9.02             | 0.103              | 0.0E+00 | 7               | 38.2                |
| P30086             | Phosphatidylethanolamine-binding protein 1                     | 8.57             | 0.161              | 4.1E-09 | 9               | 50.3                |
| O14556             | Glyceraldehyde-3-phosphate dehydrogenase, testis-specific      | 8.45             | 0.192              | 3.5E-06 | 5               | 14.5                |
| P10599             | Thioredoxin                                                    | 6.73             | 0.252              | 2.6E-04 | 3               | 32.4                |
| P60174             | Triosephosphate isomerase                                      | 6.48             | 0.130              | 1.1E-06 | 11              | 50.0                |
| O75368             | SH3 domain-binding glutamic acid-rich-like protein             | 6.11             | 0.143              | 5.2E-08 | 3               | 21.1                |
| P55769             | NHP2-like protein 1                                            | 6.10             | 0.161              | 5.9E-03 | 3               | 24.2                |
| P09211             | Glutathione S-transferase P                                    | 5.97             | 0.127              | 4.0E-09 | 7               | 38.1                |
| Q04760             | Lactoylglutathione lyase                                       | 5.76             | 0.146              | 3.7E-10 | 6               | 22.8                |
| P06733             | Alpha-enolase                                                  | 5.49             | 0.061              | 2.7E-15 | 13              | 36.4                |
| P00558             | Phosphoglycerate kinase 1                                      | 5.10             | 0.075              | 0.0E+00 | 15              | 28.3                |
| Q9HC38             | Glyoxalase domain-containing protein 4                         | 5.04             | 0.123              | 8.4E-05 | 3               | 10.5                |
| P52565             | Rho GDP-dissociation inhibitor 1                               | 4.96             | 0.177              | 9.1E-05 | 3               | 15.2                |
| P00338             | L-lactate dehydrogenase A chain                                | 4.87             | 0.095              | 3.7E-08 | 9               | 22.3                |
| P78417             | Glutathione S-transferase omega-1                              | 4.78             | 0.145              | 9.4E-05 | 7               | 27.0                |
| P07195             | L-lactate dehydrogenase B chain                                | 4.77             | 0.071              | 1.7E-14 | 9               | 24.3                |
| P61604             | 10 kDa heat shock protein, mitochondrial                       | 4.44             | 0.141              | 4.0E-04 | 6               | 51.0                |
| P24941             | Cyclin-dependent kinase 2                                      | 4.39             | 0.305              | 7.7E-03 | 6               | 23.8                |
| P40926             | Malate dehydrogenase, mitochondrial                            | 4.28             | 0.069              | 2.4E-15 | 11              | 39.3                |
| P04080             | Cystatin-B                                                     | 4.00             | 0.108              | 1.9E-09 | 4               | 49.0                |
| P19338             | Nucleolin                                                      | 3.95             | 0.079              | 1.1E-13 | 16              | 17.3                |
| P0DME0             | Protein SETSIP                                                 | 3.78             | 0.151              | 3.1E-05 | 4               | 15.6                |
| Q9Y6U3             | Adseverin                                                      | 3.72             | 0.162              | 4.3E-04 | 9               | 11.7                |
| P12955             | Xaa-Pro dipeptidase                                            | 3.70             | 0.086              | 3.6E-05 | 5               | 9.1                 |
| P51858             | Hepatoma-derived growth factor                                 | 3.70             | 0.167              | 1.4E-03 | 3               | 15.8                |
| P16401             | Histone H1.5                                                   | 3.67             | 0.169              | 1.4E-03 | 6               | 15.9                |
| P99999             | Cytochrome c                                                   | 3.63             | 0.149              | 2.7E-04 | 3               | 24.8                |
| P13797             | Plastin-3                                                      | 3.61             | 0.152              | 9.2E-06 | 9               | 15.4                |
| P09429             | High mobility group protein B1                                 | 3.53             | 0.170              | 3.8E-04 | 6               | 25.6                |
| Q16658             | Fascin                                                         | 3.52             | 0.050              | 2.1E-05 | 3               | 8.1                 |
| P52815             | 39S ribosomal protein L12, mitochondrial                       | 3.42             | 0.139              | 2.3E-02 | 3               | 11.6                |
| P16152             | Carbonyl reductase [NADPH] 1                                   | 3.35             | 0.130              | 6.7E-05 | 4               | 16.6                |
| P16219             | Short-chain specific acyl-CoA dehydrogenase, mitochondrial     | 3.32             | 0.164              | 2.9E-02 | 6               | 16.0                |
| P63241             | Eukaryotic translation initiation factor 5A-1                  | 3.23             | 0.209              | 8.8E-04 | 6               | 27.9                |
| P25786             | Proteasome subunit alpha type-1                                | 3.14             | 0.177              | 4.0E-03 | 5               | 16.0                |
| P23526             | Adenosylhomocysteinase                                         | 3.14             | 0.194              | 2.2E-04 | 6               | 16.7                |
| P04406             | Glyceraldehyde-3-phosphate dehydrogenase                       | 3.11             | 0.066              | 1.1E-10 | 11              | 35.8                |
| O14818             | Proteasome subunit alpha type-7                                | 3.10             | 0.089              | 1.5E-02 | 5               | 20.6                |
| P22087             | rRNA 2'-O-methyltransferase fibrillar                          | 3.09             | 0.115              | 2.2E-03 | 6               | 19.6                |
| P06748             | Nucleophosmin                                                  | 3.09             | 0.105              | 1.1E-05 | 7               | 20.1                |
| P21291             | Cysteine and glycine-rich protein 1                            | 3.08             | 0.153              | 5.4E-03 | 3               | 21.8                |
| Q06323             | Proteasome activator complex subunit 1                         | 3.05             | 0.163              | 1.1E-03 | 7               | 25.7                |
| P07737             | Profilin-1                                                     | 2.97             | 0.150              | 2.3E-03 | 5               | 37.9                |
| Q00796             | Sorbitol dehydrogenase                                         | 2.95             | 0.060              | 6.2E-04 | 4               | 9.0                 |
| P63104             | 14-3-3 protein zeta/delta                                      | 2.91             | 0.090              | 1.1E-02 | 7               | 34.7                |
| P29401             | Transketolase                                                  | 2.90             | 0.123              | 8.6E-04 | 13              | 19.4                |
| O75531             | Barrier-to-autointegration factor                              | 2.83             | 0.115              | 1.9E-05 | 3               | 29.2                |
| P08758             | Annexin A5                                                     | 2.81             | 0.050              | 0.0E+00 | 16              | 44.4                |
| O95336             | 6-phosphogluconolactonase                                      | 2.80             | 0.109              | 2.0E-03 | 3               | 14.7                |
| P31948             | Stress-induced-phosphoprotein 1                                | 2.79             | 0.095              | 2.6E-08 | 9               | 13.6                |
| P23528             | Cofilin-1                                                      | 2.79             | 0.068              | 2.8E-04 | 7               | 49.4                |
| P50453             | Serin B9                                                       | 2.75             | 0.131              | 7.5E-04 | 6               | 21.0                |
| O14618             | Copper chaperone for superoxide dismutase                      | 2.74             | 0.334              | 1.5E-02 | 3               | 10.9                |
| Q9H4A4             | Aminopeptidase B                                               | 2.72             | 0.031              | 2.3E-03 | 3               | 4.5                 |
| P52566             | Rho GDP-dissociation inhibitor 2                               | 2.68             | 0.076              | 3.3E-03 | 3               | 21.9                |
| Q08380             | Galectin-3-binding protein                                     | 2.67             | 0.219              | 3.1E-03 | 4               | 8.0                 |
| Q00059             | Transcription factor A, mitochondrial                          | 2.66             | 0.193              | 2.1E-03 | 4               | 17.9                |
| Q07955             | Serine/arginine-rich splicing factor 1                         | 2.65             | 0.140              | 1.8E-05 | 5               | 17.3                |
| Q96KP4             | Cytosolic non-specific dipeptidase                             | 2.65             | 0.101              | 1.1E-06 | 7               | 20.0                |
| Q14847             | LIM and SH3 domain protein 1                                   | 2.63             | 0.344              | 2.1E-03 | 4               | 14.6                |
| P62750             | 60S ribosomal protein L23a                                     | 2.63             | 0.054              | 1.7E-03 | 4               | 26.9                |
| P02768             | Serum albumin                                                  | 2.63             | 0.023              | 0.0E+00 | 39              | 60.6                |
| Q00299             | Chloride intracellular channel protein 1                       | 2.62             | 0.188              | 4.0E-02 | 3               | 10.0                |
| Q03154             | Aminoacylase-1                                                 | 2.62             | 0.153              | 4.0E-03 | 3               | 8.1                 |
| P40925             | Malate dehydrogenase, cytoplasmic                              | 2.60             | 0.080              | 1.4E-05 | 3               | 10.5                |
| P51149             | Ras-related protein Rab-7a                                     | 2.58             | 0.066              | 3.5E-09 | 6               | 30.0                |
| Q9NR28             | Diablo homolog, mitochondrial                                  | 2.54             | 0.055              | 4.6E-07 | 4               | 18.4                |
| P18669             | Phosphoglycerate mutase 1                                      | 2.53             | 0.079              | 1.3E-08 | 4               | 23.6                |
| P16402             | Histone H1.3                                                   | 2.53             | 0.099              | 1.6E-06 | 6               | 15.4                |
| P14174             | Macrophage migration inhibitory factor                         | 17.68            | NA                 | NA      | 2               | 17.4                |
| P06454             | Prothymosin alpha                                              | 14.05            | 0.248              | 9.4E-02 | 3               | 21.6                |
| Q6EEV6             | Small ubiquitin-related modifier 4                             | 7.63             | NA                 | NA      | 2               | 23.2                |
| O00625             | Pirin                                                          | 6.41             | NA                 | NA      | 2               | 6.2                 |
| P07108             | Acyl-CoA-binding protein                                       | 5.68             | NA                 | NA      | 2               | 41.4                |
| Q15102             | Platelet-activating factor acetylhydrolase IB subunit gamma    | 4.72             | NA                 | NA      | 2               | 9.1                 |
| Q12931             | Heat shock protein 75 kDa, mitochondrial                       | 3.84             | NA                 | NA      | 2               | 4.4                 |
| O60220             | Mitochondrial import inner membrane translocase subunit Tim8 A | 3.75             | NA                 | NA      | 2               | 22.7                |
| P16083             | Ribosyl(dihydro)nicotinamide dehydrogenase [quinone]           | 3.72             | NA                 | NA      | 2               | 9.1                 |
| P07919             | Cytochrome b-c1 complex subunit 6, mitochondrial               | 3.48             | NA                 | NA      | 2               | 15.4                |
| P36959             | GMP reductase 1                                                | 3.13             | NA                 | NA      | 2               | 7.0                 |
| P62310             | U6 snRNA-associated Sm-like protein LSm3                       | 3.11             | NA                 | NA      | 2               | 19.6                |
| P62826             | GTP-binding nuclear protein Ran                                | 3.09             | 0.494              | 3.1E-01 | 3               | 10.2                |
| P25788             | Proteasome subunit alpha type-3                                | 3.06             | 0.299              | 5.5E-02 | 4               | 13.7                |
| P63279             | SUMO-conjugating enzyme UBC9                                   | 3.02             | NA                 | NA      | 2               | 16.5                |
| P00441             | Superoxide dismutase [Cu-Zn]                                   | 3.01             | NA                 | NA      | 2               | 13.0                |
| P40121             | Macrophage-capping protein                                     | 2.96             | 0.197              | 1.1E-01 | 3               | 8.3                 |
| Q9BLP0             | EF-hand domain-containing protein D1                           | 2.95             | 0.324              | 6.5E-02 | 4               | 26.4                |
| P16949             | Stathmin                                                       | 2.95             | NA                 | NA      | 2               | 14.8                |
| P60900             | Proteasome subunit alpha type-6                                | 2.88             | 0.411              | 1.1E-01 | 3               | 16.3                |
| Q15819             | Ubiquitin-conjugating enzyme E2 variant 2                      | 2.87             | NA                 | NA      | 2               | 13.1                |
| Q13243             | Serine/arginine-rich splicing factor 5                         | 2.80             | NA                 | NA      | 2               | 5.9                 |
| O15400             | Syntaxin-7                                                     | 2.79             | 0.241              | 4.4E-01 | 3               | 11.5                |
| P82979             | SAP domain-containing ribonucleoprotein                        | 2.77             | NA                 | NA      | 2               | 11.4                |
| P07741             | Adenine phosphoribosyltransferase                              | 2.74             | NA                 | NA      | 2               | 10.0                |
| P02042             | Hemoglobin subunit delta                                       | 2.73             | NA                 | NA      | 2               | 17.7                |
| P15531             | Nucleoside diphosphate kinase A                                | 2.69             | NA                 | NA      | 2               | 13.2                |
| P27695             | DNA-(apurinic or apyrimidinic site) lyase                      | 2.69             | NA                 | NA      | 2               | 5.3                 |
| O95834             | Echinoderm microtubule-associated protein-like 2               | 2.68             | NA                 | NA      | 2               | 4.0                 |
| O75347             | Tubulin-specific chaperone A                                   | 2.60             | NA                 | NA      | 2               | 20.4                |
| P25789             | Proteasome subunit alpha type-4                                | 2.59             | NA                 | NA      | 2               | 6.5                 |
| Q86UE4             | Protein LYRIC                                                  | 2.58             | NA                 | NA      | 2               | 4.0                 |
| P20042             | Eukaryotic translation initiation factor 2 subunit 2           | 2.57             | 0.357              | 1.4E-01 | 3               | 13.2                |
| P31939             | Bifunctional purine biosynthesis protein PURH                  | 2.55             | NA                 | NA      | 2               | 3.4                 |
| P49720             | Proteasome subunit beta type-3                                 | 2.54             | NA                 | NA      | 2               | 7.8                 |
| P16930             | Fumarylacetoacetase                                            | 2.54             | NA                 | NA      | 2               | 5.0                 |
| Q9BQI0             | Allograft inflammatory factor 1-like                           | 2.53             | NA                 | NA      | 2               | 15.3                |

Table S8-Sample UM23

|        |                                                                                |      |       |         |    |      |
|--------|--------------------------------------------------------------------------------|------|-------|---------|----|------|
| Q8IV08 | Phospholipase D3                                                               | 2.53 | NA    | NA      | 2  | 4.3  |
| P40967 | Melanocyte protein PMEL                                                        | 2.51 | NA    | NA      | 2  | 3.3  |
| P60842 | Eukaryotic initiation factor 4A-I                                              | 2.51 | 0.153 | 1.5E-04 | 5  | 12.8 |
| P54819 | Adenylate kinase 2, mitochondrial                                              | 2.50 | 0.118 | 6.7E-04 | 3  | 14.2 |
| P07900 | Heat shock protein HSP 90-alpha                                                | 2.49 | 0.053 | 3.3E-12 | 14 | 16.8 |
| P39748 | Flap endonuclease 1                                                            | 2.47 | NA    | NA      | 2  | 4.5  |
| P69905 | Hemoglobin subunit alpha                                                       | 2.45 | 0.054 | 1.5E-13 | 9  | 71.1 |
| P07910 | Heterogeneous nuclear ribonucleoproteins C1/C2                                 | 2.44 | 0.089 | 2.4E-06 | 8  | 21.2 |
| P02787 | Serotransferrin                                                                | 2.43 | 0.083 | 2.6E-08 | 12 | 18.8 |
| Q53EL6 | Programmed cell death protein 4                                                | 2.43 | 0.127 | 5.4E-03 | 7  | 14.5 |
| P30085 | UMP-CMP kinase                                                                 | 2.43 | NA    | NA      | 2  | 10.7 |
| P07954 | Fumarate hydratase, mitochondrial                                              | 2.40 | 0.131 | 3.2E-03 | 6  | 13.1 |
| Q16576 | Histone-binding protein RBBP7                                                  | 2.40 | NA    | NA      | 2  | 3.5  |
| Q9UL46 | Proteasome activator complex subunit 2                                         | 2.40 | 0.063 | 1.8E-03 | 3  | 21.3 |
| P30044 | Peroxisomal protein PEX5, mitochondrial                                        | 2.39 | NA    | NA      | 2  | 11.7 |
| Q92597 | Protein NDRG1                                                                  | 2.38 | 0.230 | 1.7E-02 | 5  | 16.8 |
| Q13185 | Chromobox protein homolog 3                                                    | 2.37 | 0.097 | 1.8E-03 | 3  | 18.0 |
| P31937 | 3-hydroxyisobutyrate dehydrogenase, mitochondrial                              | 2.36 | NA    | NA      | 2  | 9.2  |
| Q13126 | S-methyl-5'-thioadenosine phosphorylase                                        | 2.35 | 0.439 | 1.3E-01 | 3  | 9.5  |
| P78324 | Tyrosine-protein phosphatase non-receptor type substrate 1                     | 2.33 | NA    | NA      | 2  | 5.6  |
| P38646 | Stress-70 protein, mitochondrial                                               | 2.33 | 0.088 | 1.0E-10 | 14 | 20.5 |
| P08238 | Heat shock protein HSP 90-beta                                                 | 2.32 | 0.077 | 2.5E-09 | 11 | 11.7 |
| P15121 | Aldose reductase                                                               | 2.32 | 0.197 | 9.6E-03 | 6  | 19.0 |
| P0C0S8 | Histone H2A type 1                                                             | 2.32 | NA    | NA      | 2  | 23.1 |
| P14618 | Pyruvate kinase PKM                                                            | 2.31 | 0.036 | 0.0E+00 | 8  | 15.4 |
| P01857 | Ig gamma-1 chain C region                                                      | 2.31 | 0.108 | 1.0E-06 | 6  | 31.5 |
| P28066 | Proteasome subunit alpha type-5                                                | 2.29 | 0.171 | 2.6E-02 | 3  | 17.4 |
| P05387 | 60S acidic ribosomal protein P2                                                | 2.29 | 0.112 | 6.5E-05 | 5  | 32.2 |
| P16070 | CD44 antigen                                                                   | 2.28 | 0.101 | 1.2E-03 | 8  | 11.1 |
| P23381 | Tryptophan-tRNA ligase, cytoplasmic                                            | 2.27 | 0.188 | 1.6E-01 | 3  | 8.5  |
| P13489 | Ribonuclease inhibitor                                                         | 2.27 | 0.105 | 4.8E-04 | 3  | 7.8  |
| P62857 | 40S ribosomal protein S28                                                      | 2.25 | NA    | NA      | 2  | 30.4 |
| Q9Y4W6 | AFG3-like protein 2                                                            | 2.24 | 0.100 | 3.5E-05 | 9  | 12.7 |
| P68871 | Hemoglobin subunit beta                                                        | 2.23 | 0.056 | 2.0E-11 | 6  | 51.0 |
| P24534 | Elongation factor 1-beta                                                       | 2.22 | 0.089 | 2.9E-03 | 3  | 9.8  |
| Q9Y2X3 | Nucleolar protein 58                                                           | 2.21 | 0.139 | 3.8E-01 | 3  | 5.9  |
| Q13510 | Acid ceramidase                                                                | 2.20 | 0.093 | 2.2E-04 | 5  | 12.4 |
| P29590 | Protein PML                                                                    | 2.20 | 0.073 | 1.8E-06 | 11 | 12.1 |
| Q13228 | Selenium-binding protein 1                                                     | 2.20 | 0.089 | 1.3E-04 | 5  | 10.0 |
| Q9Y2B0 | Protein canopy homolog 2                                                       | 2.20 | 0.070 | 6.7E-02 | 4  | 23.6 |
| Q9UNF0 | Protein kinase C and casein kinase substrate in neurons protein 2              | 2.20 | 0.170 | 1.1E-02 | 4  | 9.3  |
| P01620 | Ig kappa chain V-III region SIE                                                | 2.19 | NA    | NA      | 2  | 22.9 |
| P06744 | Glucose-6-phosphate isomerase                                                  | 2.19 | 0.100 | 1.1E-05 | 6  | 10.9 |
| P20591 | Interferon-induced GTP-binding protein Mx1                                     | 2.18 | 0.217 | 8.6E-02 | 5  | 10.3 |
| Q9Y2S2 | Lambda-crystallin homolog                                                      | 2.17 | 0.215 | 3.8E-02 | 3  | 9.1  |
| Q14103 | Heterogeneous nuclear ribonucleoprotein D0                                     | 2.16 | 0.087 | 1.1E-05 | 3  | 9.0  |
| O14979 | Heterogeneous nuclear ribonucleoprotein D-like                                 | 2.16 | 0.096 | 6.1E-06 | 3  | 4.5  |
| Q94826 | Mitochondrial import receptor subunit TOM70                                    | 2.14 | 0.124 | 9.5E-03 | 6  | 10.0 |
| Q99798 | Aconitate hydratase, mitochondrial                                             | 2.13 | 0.077 | 1.9E-05 | 9  | 14.7 |
| Q15942 | Zyxin                                                                          | 2.13 | 0.495 | 5.8E-02 | 3  | 8.7  |
| P13693 | Translationally-controlled tumor protein                                       | 2.11 | NA    | NA      | 2  | 15.7 |
| P04792 | Heat shock protein beta-1                                                      | 2.10 | 0.056 | 2.1E-10 | 8  | 29.8 |
| P57729 | Ras-related protein Rab-38                                                     | 2.10 | 0.149 | 3.5E-03 | 4  | 18.0 |
| P46926 | Glucosamine-6-phosphate isomerase 1                                            | 2.10 | 0.112 | 4.8E-03 | 7  | 18.7 |
| O00567 | Nucleolar protein 56                                                           | 2.09 | 0.235 | 7.9E-02 | 4  | 6.6  |
| P25398 | 40S ribosomal protein S12                                                      | 2.08 | 0.079 | 8.8E-04 | 4  | 33.3 |
| P08195 | 4F2 cell-surface antigen heavy chain                                           | 2.08 | 0.087 | 8.9E-06 | 7  | 13.3 |
| O00148 | ATP-dependent RNA helicase DDX39A                                              | 2.08 | 0.064 | 1.1E-05 | 3  | 6.8  |
| Q96GK7 | Fumarylacetoacetate hydrolase domain-containing protein 2A                     | 2.07 | 0.478 | 9.3E-02 | 3  | 14.3 |
| P20618 | Proteasome subunit beta type-1                                                 | 2.07 | 0.112 | 1.1E-03 | 5  | 23.7 |
| P30042 | ES1 protein homolog, mitochondrial                                             | 2.06 | 0.240 | 1.2E-01 | 4  | 20.5 |
| P12270 | Nucleoprotein TPR                                                              | 2.06 | 0.051 | 7.1E-05 | 5  | 3.2  |
| Q9Y5K6 | CD2-associated protein                                                         | 2.06 | 0.854 | 3.8E-01 | 3  | 7.0  |
| P29966 | Myristoylated alanine-rich C-kinase substrate                                  | 2.05 | 0.263 | 7.5E-03 | 6  | 29.8 |
| P62158 | Calmodulin                                                                     | 2.04 | 0.160 | 8.8E-03 | 4  | 29.5 |
| Q14247 | Src substrate cortactin                                                        | 2.04 | 0.265 | 7.2E-02 | 5  | 6.9  |
| P35613 | Basigin                                                                        | 2.04 | 0.179 | 8.6E-04 | 3  | 10.9 |
| P27816 | Microtubule-associated protein 4                                               | 2.03 | 0.256 | 2.2E-02 | 5  | 5.6  |
| Q92945 | Far upstream element-binding protein 2                                         | 2.00 | 0.112 | 4.6E-05 | 6  | 8.7  |
| O75390 | Citrate synthase, mitochondrial                                                | 1.99 | 0.124 | 2.3E-02 | 4  | 8.4  |
| Q9NX63 | Coiled-coil-helix-coiled-coil-helix domain-containing protein 3, mitochondrial | 1.98 | 0.129 | 1.3E-02 | 3  | 12.3 |
| P13798 | Acylamino-acid-releasing enzyme                                                | 1.98 | 0.010 | 4.5E-03 | 3  | 4.6  |
| Q14677 | Clathrin interactor 1                                                          | 1.97 | NA    | NA      | 2  | 3.4  |
| P21796 | Voltage-dependent anion-selective channel protein 1                            | 1.97 | 0.062 | 1.5E-03 | 6  | 19.8 |
| P31949 | Protein S100-A11                                                               | 1.96 | 0.087 | 1.4E-03 | 3  | 32.4 |
| P06753 | Tropomyosin alpha-3 chain                                                      | 1.96 | 0.085 | 3.6E-07 | 4  | 13.0 |
| P61106 | Ras-related protein Rab-14                                                     | 1.95 | NA    | NA      | 2  | 7.9  |
| Q9NY12 | H/ACA ribonucleoprotein complex subunit 1                                      | 1.95 | NA    | NA      | 2  | 7.4  |
| Q9UQ80 | Proliferation-associated protein 2G4                                           | 1.94 | NA    | NA      | 2  | 5.1  |
| P55786 | Puromycin-sensitive aminopeptidase                                             | 1.94 | 0.183 | 3.6E-02 | 4  | 4.8  |
| P62851 | 40S ribosomal protein S25                                                      | 1.93 | 0.054 | 5.4E-07 | 5  | 29.6 |
| P30485 | HLA class I histocompatibility antigen, B-47 alpha chain                       | 1.93 | 0.091 | 5.1E-04 | 3  | 11.0 |
| Q16543 | Hsp90 co-chaperone Cdc37                                                       | 1.93 | NA    | NA      | 2  | 5.3  |
| P51608 | Methyl-CpG-binding protein 2                                                   | 1.93 | NA    | NA      | 2  | 5.1  |
| O75348 | V-type proton ATPase subunit G 1                                               | 1.92 | 0.174 | 2.0E-02 | 3  | 28.8 |
| O75874 | Isocitrate dehydrogenase [NADP] cytoplasmic                                    | 1.92 | NA    | NA      | 2  | 5.3  |
| P14550 | Alcohol dehydrogenase [NADP(+)]                                                | 1.91 | NA    | NA      | 2  | 7.1  |
| Q13428 | Treacle protein                                                                | 1.91 | NA    | NA      | 2  | 1.6  |
| Q9NRX4 | 14 kDa phosphohistidine phosphatase                                            | 1.91 | NA    | NA      | 2  | 25.6 |
| P28072 | Proteasome subunit beta type-6                                                 | 1.90 | NA    | NA      | 2  | 9.2  |
| P50395 | Rab GDP dissociation inhibitor beta                                            | 1.90 | 0.135 | 4.0E-02 | 7  | 18.2 |
| Q9UKY7 | Protein CDV3 homolog                                                           | 1.90 | NA    | NA      | 2  | 6.2  |
| P10809 | 60 kDa heat shock protein, mitochondrial                                       | 1.89 | 0.110 | 9.9E-05 | 14 | 22.0 |
| Q02790 | Peptidyl-prolyl cis-trans isomerase FKBP4                                      | 1.89 | NA    | NA      | 2  | 4.8  |
| O43852 | Calumenin                                                                      | 1.88 | 0.075 | 2.0E-04 | 6  | 17.5 |
| Q14240 | Eukaryotic initiation factor 4A-II                                             | 1.87 | 0.174 | 2.6E-02 | 3  | 8.8  |
| Q9UKV3 | Apoptotic chromatin condensation inducer in the nucleus                        | 1.87 | NA    | NA      | 2  | 1.6  |
| Q12906 | Interleukin enhancer-binding factor 3                                          | 1.87 | 0.103 | 3.5E-04 | 8  | 10.5 |
| Q13011 | Delta(3,5)-Delta(2,4)-dienoyl-CoA isomerase, mitochondrial                     | 1.86 | 0.069 | 9.6E-07 | 5  | 15.2 |
| P13639 | Elongation factor 2                                                            | 1.86 | 0.047 | 1.3E-09 | 11 | 14.5 |
| P39687 | Acidic leucine-rich nuclear phosphoprotein 32 family member A                  | 1.85 | 0.146 | 6.5E-03 | 4  | 17.3 |
| P30512 | HLA class I histocompatibility antigen, A-29 alpha chain                       | 1.85 | 0.315 | 3.3E-01 | 3  | 10.7 |
| Q9UJZ1 | Stomatin-like protein 2, mitochondrial                                         | 1.85 | 0.185 | 1.1E-01 | 3  | 12.1 |
| O75083 | WD repeat-containing protein 1                                                 | 1.85 | 0.124 | 4.0E-03 | 4  | 6.8  |
| P18621 | 60S ribosomal protein L17                                                      | 1.85 | 0.280 | 3.6E-02 | 5  | 19.6 |
| Q9BXK5 | Bcl-2-like protein 13                                                          | 1.84 | NA    | NA      | 2  | 4.3  |
| Q14165 | Malectin                                                                       | 1.84 | 0.122 | 3.1E-03 | 4  | 11.6 |
| Q13277 | Syntaxin-3                                                                     | 1.84 | NA    | NA      | 2  | 4.8  |
| Q01130 | Serine/arginine-rich splicing factor 2                                         | 1.83 | NA    | NA      | 2  | 6.8  |
| Q99497 | Protein DJ-1                                                                   | 1.82 | 0.242 | 6.2E-02 | 4  | 20.1 |
| P49773 | Histidine triad nucleotide-binding protein 1                                   | 1.81 | 0.166 | 3.4E-01 | 4  | 42.9 |
| P04075 | Fructose-bisphosphate aldolase A                                               | 1.80 | 0.067 | 3.0E-04 | 14 | 45.1 |
| P29692 | Elongation factor 1-delta                                                      | 1.79 | 0.101 | 1.5E-02 | 3  | 11.4 |
| P08107 | Heat shock 70 kDa protein 1A/1B                                                | 1.79 | 0.053 | 6.9E-05 | 15 | 22.0 |
| Q13435 | Splicing factor 3B subunit 2                                                   | 1.79 | NA    | NA      | 2  | 4.4  |

Table S8-Sample UM23

|        |                                                                          |      |        |         |    |      |
|--------|--------------------------------------------------------------------------|------|--------|---------|----|------|
| Q9UH65 | Switch-associated protein 70                                             | 1.78 | 0.150  | 5.8E-02 | 3  | 4.8  |
| P02458 | Collagen alpha-1(I) chain                                                | 1.78 | NA     | NA      | 2  | 1.5  |
| P50502 | Hsc70-interacting protein                                                | 1.78 | 0.115  | 2.9E-02 | 5  | 10.8 |
| P42224 | Signal transducer and activator of transcription 1-alpha/beta            | 1.77 | NA     | NA      | 2  | 3.6  |
| Q8NBS9 | Thioredoxin domain-containing protein 5                                  | 1.77 | 0.051  | 9.4E-04 | 5  | 12.7 |
| O15533 | Tapasin                                                                  | 1.76 | NA     | NA      | 2  | 4.2  |
| P50213 | Isocitrate dehydrogenase [NAD] subunit alpha, mitochondrial              | 1.75 | 0.080  | 1.1E-04 | 4  | 12.8 |
| Q96199 | Succinyl-CoA ligase [GDP-forming] subunit beta, mitochondrial            | 1.75 | NA     | NA      | 2  | 4.6  |
| P35232 | Prohibitin                                                               | 1.74 | 0.046  | 8.7E-10 | 9  | 32.7 |
| P08574 | Cytochrome c1, heme protein, mitochondrial                               | 1.73 | NA     | NA      | 2  | 7.1  |
| P11216 | Glycogen phosphorylase, brain form                                       | 1.73 | 0.105  | 1.8E-05 | 7  | 10.4 |
| Q9Y371 | Endophilin-B1                                                            | 1.73 | NA     | NA      | 2  | 5.8  |
| P08865 | 40S ribosomal protein SA                                                 | 1.73 | 0.061  | 2.4E-05 | 6  | 25.4 |
| Q96AG4 | Leucine-rich repeat-containing protein 59                                | 1.73 | 0.101  | 6.9E-04 | 3  | 9.4  |
| Q32CQ8 | Mitochondrial import inner membrane translocase subunit TIM50            | 1.72 | NA     | NA      | 2  | 8.5  |
| P30405 | Peptidyl-prolyl cis-trans isomerase F, mitochondrial                     | 1.72 | NA     | NA      | 2  | 9.2  |
| Q02818 | Nucleobindin-1                                                           | 1.71 | 0.081  | 7.6E-05 | 7  | 17.1 |
| P23246 | Splicing factor, proline- and glutamine-rich                             | 1.71 | 0.164  | 2.4E-01 | 6  | 8.6  |
| P46776 | 60S ribosomal protein L27a                                               | 1.70 | NA     | NA      | 2  | 14.2 |
| P37802 | Transgelin-2                                                             | 1.70 | NA     | NA      | 2  | 10.1 |
| Q06830 | Peroxisome protein 1                                                     | 1.69 | 0.061  | 3.5E-08 | 8  | 44.2 |
| O15173 | Membrane-associated progesterone receptor component 2                    | 1.67 | 0.239  | 4.6E-02 | 3  | 18.4 |
| P09914 | Interferon-induced protein with tetratricopeptide repeats 1              | 1.66 | NA     | NA      | 2  | 6.3  |
| Q53H82 | Beta-lactamase-like protein 2                                            | 1.66 | NA     | NA      | 2  | 6.3  |
| Q8NFV4 | Alpha/beta hydrolase domain-containing protein 11                        | 1.66 | NA     | NA      | 2  | 8.6  |
| P27797 | Calreticulin                                                             | 1.65 | 0.094  | 6.7E-03 | 8  | 16.1 |
| P26641 | Elongation factor 1-gamma                                                | 1.65 | 0.221  | 3.3E-02 | 4  | 8.9  |
| Q99536 | Synaptic vesicle membrane protein VAT-1 homolog                          | 1.65 | 0.083  | 1.3E-04 | 11 | 39.2 |
| B5ME19 | Eukaryotic translation initiation factor 3 subunit C-like protein        | 1.64 | 0.052  | 2.2E-03 | 4  | 4.3  |
| P01834 | Ig kappa chain C region                                                  | 1.64 | NA     | NA      | 2  | 34.9 |
| Q13263 | Transcription intermediary factor 1-beta                                 | 1.64 | 0.159  | 2.6E-02 | 4  | 5.5  |
| Q43399 | Tumor protein D54                                                        | 1.63 | 0.089  | 3.7E-03 | 3  | 16.0 |
| P42704 | Leucine-rich PPR motif-containing protein, mitochondrial                 | 1.63 | 0.110  | 3.1E-04 | 9  | 6.2  |
| P31040 | Succinate dehydrogenase [ubiquinone] flavoprotein subunit, mitochondrial | 1.63 | 0.339  | 8.8E-02 | 4  | 7.4  |
| P09651 | Heterogeneous nuclear ribonucleoprotein A1                               | 1.62 | 0.051  | 9.0E-08 | 6  | 16.7 |
| P23284 | Peptidyl-prolyl cis-trans isomerase B                                    | 1.62 | 0.069  | 5.4E-08 | 9  | 35.6 |
| P0CG05 | Ig lambda-2 chain C regions                                              | 1.62 | NA     | NA      | 2  | 23.6 |
| Q5VTE0 | Putative elongation factor 1-alpha-like 3                                | 1.62 | 0.124  | 6.6E-03 | 10 | 20.3 |
| Q9UMY4 | Sorting nexin-12                                                         | 1.61 | NA     | NA      | 2  | 11.0 |
| Q92688 | Acidic leucine-rich nuclear phosphoprotein 32 family member B            | 1.61 | 0.284  | 2.3E-01 | 4  | 17.1 |
| P62263 | 40S ribosomal protein S14                                                | 1.61 | 0.089  | 3.4E-03 | 4  | 36.4 |
| P83731 | 60S ribosomal protein L24                                                | 1.60 | 0.099  | 1.4E-03 | 4  | 25.5 |
| P31153 | S-adenosylmethionine synthase isoform type-2                             | 1.59 | 0.279  | 2.9E-01 | 3  | 9.4  |
| P09874 | Poly [ADP-ribose] polymerase 1                                           | 1.59 | 0.098  | 1.5E-03 | 9  | 10.4 |
| P25685 | DnaJ homolog subfamily B member 1                                        | 1.59 | 0.124  | 1.9E-02 | 4  | 10.0 |
| Q14974 | Importin subunit beta-1                                                  | 1.59 | 2.466  | 2.6E-01 | 4  | 6.7  |
| P51991 | Heterogeneous nuclear ribonucleoprotein A3                               | 1.58 | 0.064  | 3.4E-07 | 6  | 17.7 |
| P51532 | Transcription activator BRG1                                             | 1.58 | 0.535  | 4.3E-01 | 3  | 2.1  |
| Q15907 | Ras-related protein Rab-11B                                              | 1.58 | 0.099  | 3.0E-03 | 6  | 26.6 |
| Q04446 | 1,4-alpha-glucan-branching enzyme                                        | 1.57 | NA     | NA      | 2  | 4.4  |
| P61204 | ADP-ribosylation factor 3                                                | 1.57 | NA     | NA      | 2  | 10.5 |
| Q1KMD3 | Heterogeneous nuclear ribonucleoprotein U-like protein 2                 | 1.56 | 0.114  | 7.8E-02 | 5  | 6.8  |
| P28838 | Cytosol aminopeptidase                                                   | 1.56 | 0.241  | 5.1E-02 | 8  | 19.3 |
| P42167 | Lamina-associated polypeptide 2, isoforms beta/gamma                     | 1.56 | 0.335  | 4.9E-01 | 4  | 11.0 |
| Q43809 | Cleavage and polyadenylation specificity factor subunit 5                | 1.56 | 0.512  | 2.2E-01 | 3  | 16.7 |
| P30041 | Peroxisome protein 6                                                     | 1.55 | 0.059  | 2.1E-05 | 6  | 19.6 |
| O15145 | Actin-related protein 2/3 complex subunit 3                              | 1.55 | NA     | NA      | 2  | 9.6  |
| P61978 | Heterogeneous nuclear ribonucleoprotein K                                | 1.55 | 0.051  | 5.6E-08 | 12 | 28.3 |
| P28062 | Proteasome subunit beta type-8                                           | 1.55 | NA     | NA      | 2  | 10.1 |
| Q14152 | Eukaryotic translation initiation factor 3 subunit A                     | 1.55 | 0.111  | 4.1E-02 | 5  | 4.7  |
| Q9NSE4 | Isolucine-tRNA ligase, mitochondrial                                     | 1.55 | 0.094  | 4.9E-03 | 8  | 11.7 |
| Q92616 | Translational activator GCN1                                             | 1.54 | 0.100  | 7.0E-02 | 5  | 1.6  |
| P49411 | Elongation factor Tu, mitochondrial                                      | 1.54 | 0.036  | 7.9E-09 | 9  | 21.5 |
| O75400 | Pre-mRNA-processing factor 40 homolog A                                  | 1.54 | NA     | NA      | 2  | 1.7  |
| Q9UNZ2 | NSFL1 cofactor p47                                                       | 1.54 | 0.378  | 3.2E-01 | 3  | 11.1 |
| Q9UHX1 | Poly(U)-binding-splicing factor PUF60                                    | 1.54 | 0.071  | 9.5E-03 | 4  | 6.8  |
| P62906 | 60S ribosomal protein L10a                                               | 1.54 | 0.089  | 5.6E-04 | 6  | 27.6 |
| P34932 | Heat shock 70 kDa protein 4                                              | 1.54 | 0.136  | 5.1E-02 | 5  | 6.4  |
| O60814 | Histone H2B type 1-K                                                     | 1.53 | NA     | NA      | 2  | 7.9  |
| O60506 | Heterogeneous nuclear ribonucleoprotein Q                                | 1.53 | 0.114  | 7.5E-02 | 3  | 5.6  |
| P53597 | Succinyl-CoA ligase [ADP/GDP-forming] subunit alpha, mitochondrial       | 1.52 | 0.211  | 1.9E-01 | 4  | 12.4 |
| P43243 | Matrin-3                                                                 | 1.52 | NA     | NA      | 2  | 3.8  |
| P62241 | 40S ribosomal protein S8                                                 | 1.52 | NA     | NA      | 2  | 9.1  |
| Q13423 | NAD(P) transhydrogenase, mitochondrial                                   | 1.52 | 0.162  | 1.6E-02 | 7  | 6.3  |
| P46783 | 40S ribosomal protein S10                                                | 1.51 | 0.189  | 1.0E-01 | 3  | 20.0 |
| P35268 | 60S ribosomal protein L22                                                | 1.51 | NA     | NA      | 2  | 18.8 |
| Q86TX2 | Acyl-coenzyme A thioesterase 1                                           | 1.51 | NA     | NA      | 2  | 5.2  |
| P26885 | Peptidyl-prolyl cis-trans isomerase FKBP2                                | 1.51 | 0.276  | 2.3E-01 | 3  | 14.1 |
| P78347 | General transcription factor II-I                                        | 1.50 | 0.963  | 4.0E-01 | 3  | 3.0  |
| P35659 | Protein DEK                                                              | 1.50 | 0.192  | 1.7E-01 | 4  | 13.6 |
| P22314 | Ubiquitin-like modifier-activating enzyme 1                              | 1.50 | 0.147  | 1.1E-01 | 4  | 4.3  |
| Q9BZ25 | Apoptosis inhibitor 5                                                    | 1.50 | 0.299  | 2.2E-01 | 3  | 5.9  |
| Q00839 | Heterogeneous nuclear ribonucleoprotein U                                | 1.50 | 0.074  | 2.4E-04 | 8  | 9.0  |
| P63244 | Guanine nucleotide-binding protein subunit beta-2-like 1                 | 1.50 | NA     | NA      | 2  | 8.8  |
| O15511 | Actin-related protein 2/3 complex subunit 5                              | 1.49 | 0.188  | 7.0E-02 | 3  | 21.9 |
| P30049 | ATP synthase subunit delta, mitochondrial                                | 1.49 | NA     | NA      | 2  | 13.7 |
| P04233 | HLA class II histocompatibility antigen gamma chain                      | 1.49 | NA     | NA      | 2  | 9.8  |
| P10606 | Cytochrome c oxidase subunit 5B, mitochondrial                           | 1.49 | 0.064  | 2.5E-03 | 4  | 30.2 |
| Q15233 | Non-POU domain-containing octamer-binding protein                        | 1.49 | 0.275  | 1.7E-01 | 3  | 7.4  |
| P61981 | 14-3-3 protein gamma                                                     | 1.49 | 0.074  | 6.0E-02 | 3  | 13.8 |
| O14561 | Acyl carrier protein, mitochondrial                                      | 1.49 | 0.190  | 7.7E-02 | 3  | 15.4 |
| P60866 | 40S ribosomal protein S20                                                | 1.49 | 0.136  | 4.8E-02 | 3  | 25.2 |
| P61353 | 60S ribosomal protein L27                                                | 1.49 | 0.341  | 1.1E-01 | 3  | 27.9 |
| Q15063 | Periostin                                                                | 1.48 | 0.100  | 3.6E-02 | 6  | 9.8  |
| P12956 | X-ray repair cross-complementing protein 6                               | 1.48 | 0.055  | 1.1E-06 | 10 | 15.9 |
| P07339 | Cathepsin D                                                              | 1.48 | 0.040  | 2.6E-06 | 4  | 9.7  |
| O75380 | NADH dehydrogenase [ubiquinone] iron-sulfur protein 6, mitochondrial     | 1.48 | NA     | NA      | 2  | 20.2 |
| P51665 | 26S proteasome non-ATPase regulatory subunit 7                           | 1.48 | NA     | NA      | 2  | 6.2  |
| P26599 | Polypyrimidine tract-binding protein 1                                   | 1.46 | NA     | NA      | 2  | 2.8  |
| Q12905 | Interleukin enhancer-binding factor 2                                    | 1.46 | 0.068  | 1.9E-04 | 3  | 9.5  |
| P62258 | 14-3-3 protein epsilon                                                   | 1.46 | 0.099  | 3.5E-02 | 8  | 27.5 |
| O96000 | NADH dehydrogenase [ubiquinone] 1 beta subcomplex subunit 10             | 1.46 | NA     | NA      | 2  | 12.2 |
| P62424 | 60S ribosomal protein L7a                                                | 1.45 | 0.121  | 8.4E-02 | 4  | 12.0 |
| Q9UHQ9 | NADH-cytochrome b5 reductase 1                                           | 1.44 | 0.150  | 2.7E-02 | 7  | 24.3 |
| P61247 | 40S ribosomal protein S3a                                                | 1.44 | 0.095  | 7.8E-03 | 5  | 18.9 |
| P01023 | Alpha-2-macroglobulin                                                    | 1.44 | 0.509  | 2.5E-01 | 12 | 10.0 |
| Q43390 | Heterogeneous nuclear ribonucleoprotein R                                | 1.44 | 0.311  | 2.1E-01 | 4  | 7.0  |
| P09622 | Dihydropyridyl dehydrogenase, mitochondrial                              | 1.44 | 0.145  | 7.6E-02 | 4  | 8.6  |
| P52597 | Heterogeneous nuclear ribonucleoprotein F                                | 1.44 | 0.277  | 3.6E-01 | 4  | 8.2  |
| Q8NC56 | LEM domain-containing protein 2                                          | 1.43 | 0.051  | 2.5E-04 | 3  | 5.6  |
| Q05397 | Focal adhesion kinase 1                                                  | 1.43 | NA     | NA      | 2  | 2.3  |
| P49792 | E3 SUMO-protein ligase RanBP2                                            | 1.43 | 0.093  | 6.4E-02 | 4  | 0.7  |
| Q13177 | Serine/threonine-protein kinase PAK 2                                    | 1.43 | NA     | NA      | 2  | 5.9  |
| P22626 | Heterogeneous nuclear ribonucleoproteins A2/B1                           | 1.43 | 0.061  | 2.3E-06 | 15 | 37.4 |
| P40227 | T-complex protein 1 subunit zeta                                         | 1.42 | 38.993 | 5.6E-01 | 3  | 7.5  |

Table S8-Sample UM23

|        |                                                                             |      |       |         |    |      |
|--------|-----------------------------------------------------------------------------|------|-------|---------|----|------|
| Q9BUJ2 | Heterogeneous nuclear ribonucleoprotein U-like protein 1                    | 1.42 | 0.373 | 1.8E-01 | 3  | 5.5  |
| P27635 | 60S ribosomal protein L10                                                   | 1.42 | NA    | NA      | 2  | 9.8  |
| O95202 | LETM1 and EF-hand domain-containing protein 1, mitochondrial                | 1.42 | 0.796 | 1.5E-01 | 4  | 6.4  |
| P13796 | Plastin-2                                                                   | 1.42 | NA    | NA      | 2  | 3.5  |
| P0CW22 | 40S ribosomal protein S17-like                                              | 1.42 | 0.137 | 1.1E-02 | 3  | 16.3 |
| P51810 | G-protein coupled receptor 143                                              | 1.42 | 0.152 | 3.5E-02 | 3  | 9.9  |
| P51148 | Ras-related protein Rab-5C                                                  | 1.41 | NA    | NA      | 2  | 10.6 |
| Q08211 | ATP-dependent RNA helicase A                                                | 1.41 | 0.239 | 1.2E-01 | 8  | 6.9  |
| P31689 | DnaJ homolog subfamily A member 1                                           | 1.41 | NA    | NA      | 2  | 4.8  |
| Q9NP81 | Serine-tRNA ligase, mitochondrial                                           | 1.41 | NA    | NA      | 2  | 6.9  |
| O75947 | ATP synthase subunit d, mitochondrial                                       | 1.41 | 0.243 | 1.9E-01 | 5  | 24.8 |
| Q16629 | Serine/arginine-rich splicing factor 7                                      | 1.41 | NA    | NA      | 2  | 8.8  |
| O15144 | Actin-related protein 2/3 complex subunit 2                                 | 1.40 | 0.113 | 1.7E-02 | 5  | 13.0 |
| P30740 | Leukocyte elastase inhibitor                                                | 1.40 | 0.083 | 1.6E-01 | 4  | 17.7 |
| P08621 | U1 small nuclear ribonucleoprotein 70 kDa                                   | 1.39 | NA    | NA      | 2  | 4.6  |
| Q99623 | Prohibitin-2                                                                | 1.39 | 0.049 | 1.8E-05 | 9  | 31.8 |
| Q9NX40 | OCIA domain-containing protein 1                                            | 1.39 | NA    | NA      | 2  | 8.2  |
| P52272 | Heterogeneous nuclear ribonucleoprotein M                                   | 1.39 | 0.037 | 2.4E-06 | 8  | 13.7 |
| P29728 | 2'-5'-oligoadenylate synthase 2                                             | 1.39 | NA    | NA      | 2  | 3.8  |
| P01860 | Ig gamma-3 chain C region                                                   | 1.39 | 0.091 | 1.5E-03 | 3  | 6.4  |
| O15371 | Eukaryotic translation initiation factor 3 subunit D                        | 1.39 | NA    | NA      | 2  | 3.5  |
| P61769 | Beta-2-microglobulin                                                        | 1.38 | NA    | NA      | 2  | 16.8 |
| O60664 | Perlipin-3                                                                  | 1.38 | NA    | NA      | 2  | 7.4  |
| P30101 | Protein disulfide-isomerase A3                                              | 1.38 | 0.050 | 1.7E-07 | 17 | 29.1 |
| P62277 | 40S ribosomal protein S13                                                   | 1.38 | 0.315 | 2.0E-02 | 7  | 42.4 |
| O00231 | 26S proteasome non-ATPase regulatory subunit 11                             | 1.38 | 0.092 | 4.2E-02 | 4  | 10.4 |
| P49755 | Transmembrane emp24 domain-containing protein 10                            | 1.38 | NA    | NA      | 2  | 9.1  |
| P49756 | RNA-binding protein 25                                                      | 1.37 | NA    | NA      | 2  | 3.9  |
| P46777 | 60S ribosomal protein L5                                                    | 1.37 | 0.244 | 7.4E-02 | 6  | 21.2 |
| Q07065 | Cytoskeleton-associated protein 4                                           | 1.37 | 0.176 | 2.7E-03 | 10 | 19.8 |
| P49721 | Proteasome subunit beta type-2                                              | 1.37 | NA    | NA      | 2  | 10.9 |
| Q16836 | Hydroxyacyl-coenzyme A dehydrogenase, mitochondrial                         | 1.37 | NA    | NA      | 2  | 6.1  |
| Q92841 | Probable ATP-dependent RNA helicase DDX17                                   | 1.37 | 0.127 | 8.8E-02 | 5  | 7.5  |
| P39019 | 40S ribosomal protein S19                                                   | 1.36 | 0.160 | 9.7E-02 | 5  | 31.0 |
| P36404 | ADP-ribosylation factor-like protein 2                                      | 1.36 | NA    | NA      | 2  | 9.2  |
| P48739 | Phosphatidylinositol transfer protein beta isoform                          | 1.36 | NA    | NA      | 2  | 9.2  |
| Q02252 | Methylmalonate-semialdehyde dehydrogenase [acylating], mitochondrial        | 1.36 | 0.096 | 1.7E-02 | 3  | 5.8  |
| P08670 | Vimentin                                                                    | 1.35 | 0.056 | 1.5E-08 | 31 | 61.8 |
| P38117 | Electron transfer flavoprotein subunit beta                                 | 1.35 | 0.095 | 9.8E-03 | 4  | 12.5 |
| P62136 | Serine/threonine-protein phosphatase PP1-alpha catalytic subunit            | 1.35 | NA    | NA      | 2  | 6.1  |
| Q9UHV9 | Prefoldin subunit 2                                                         | 1.35 | NA    | NA      | 2  | 14.9 |
| P61254 | 60S ribosomal protein L26                                                   | 1.35 | 0.106 | 3.9E-02 | 3  | 16.6 |
| Q03519 | Antigen peptide transporter 2                                               | 1.35 | NA    | NA      | 2  | 2.8  |
| O43681 | ATPase ASNA1                                                                | 1.34 | NA    | NA      | 2  | 5.5  |
| Q15366 | Poly(rC)-binding protein 2                                                  | 1.34 | NA    | NA      | 2  | 9.9  |
| P14854 | Cytochrome c oxidase subunit 6B1                                            | 1.33 | NA    | NA      | 2  | 23.3 |
| P62829 | 60S ribosomal protein L23                                                   | 1.33 | NA    | NA      | 2  | 12.9 |
| P00505 | Aspartate aminotransferase, mitochondrial                                   | 1.32 | 0.076 | 3.3E-03 | 7  | 18.8 |
| P17844 | Probable ATP-dependent RNA helicase DDX5                                    | 1.32 | NA    | NA      | 2  | 3.4  |
| O75489 | NADH dehydrogenase [ubiquinone] iron-sulfur protein 3, mitochondrial        | 1.31 | 0.077 | 4.3E-03 | 5  | 19.3 |
| P05141 | ADP/ATP translocase 2                                                       | 1.31 | NA    | NA      | 2  | 7.7  |
| P35637 | RNA-binding protein FUS                                                     | 1.31 | 0.163 | 8.2E-02 | 4  | 8.9  |
| P46778 | 60S ribosomal protein L21                                                   | 1.31 | NA    | NA      | 2  | 16.9 |
| P30048 | Thioredoxin-dependent peroxide reductase, mitochondrial                     | 1.31 | 0.167 | 6.3E-02 | 5  | 18.0 |
| P20700 | Lamin-B1                                                                    | 1.31 | 0.146 | 7.5E-02 | 9  | 16.2 |
| Q07666 | KH domain-containing, RNA-binding, signal transduction-associated protein 1 | 1.30 | NA    | NA      | 2  | 3.4  |
| P07602 | Prosaposin                                                                  | 1.30 | 0.179 | 1.9E-01 | 5  | 7.1  |
| Q27J81 | Inverted formin-2                                                           | 1.30 | NA    | NA      | 2  | 1.8  |
| P45880 | Voltage-dependent anion-selective channel protein 2                         | 1.30 | 0.094 | 8.6E-03 | 7  | 24.5 |
| Q9UIJ7 | GTP-AMP phosphotransferase AK3, mitochondrial                               | 1.30 | 0.223 | 1.6E-01 | 5  | 27.3 |
| P61158 | Actin-related protein 3                                                     | 1.30 | 0.053 | 2.4E-03 | 7  | 20.6 |
| Q13283 | Ras GTPase-activating protein-binding protein 1                             | 1.30 | NA    | NA      | 2  | 5.8  |
| P17858 | ATP-dependent 6-phosphofructokinase, liver type                             | 1.29 | 0.063 | 4.3E-03 | 5  | 8.7  |
| O43678 | NADH dehydrogenase [ubiquinone] 1 alpha subcomplex subunit 2                | 1.29 | NA    | NA      | 2  | 20.2 |
| O75367 | Core histone macro-H2A.1                                                    | 1.29 | 0.165 | 9.2E-03 | 8  | 23.7 |
| O00483 | NADH dehydrogenase [ubiquinone] 1 alpha subcomplex subunit 4                | 1.29 | NA    | NA      | 2  | 22.2 |
| P62753 | 40S ribosomal protein S6                                                    | 1.28 | 0.138 | 2.2E-01 | 3  | 12.9 |
| P62280 | 40S ribosomal protein S11                                                   | 1.28 | 0.233 | 1.8E-01 | 8  | 34.2 |
| P09382 | Galectin-1                                                                  | 1.28 | 0.065 | 2.0E-03 | 5  | 43.7 |
| P11142 | Heat shock cognate 71 kDa protein                                           | 1.28 | 0.046 | 7.8E-04 | 9  | 13.8 |
| P20810 | Calpastatin                                                                 | 1.28 | NA    | NA      | 2  | 4.7  |
| P62249 | 40S ribosomal protein S16                                                   | 1.27 | 0.046 | 1.9E-04 | 3  | 23.3 |
| Q15459 | Splicing factor 3A subunit 1                                                | 1.27 | 0.557 | 6.9E-01 | 3  | 5.4  |
| P13010 | X-ray repair cross-complementing protein 5                                  | 1.27 | 0.404 | 5.0E-01 | 5  | 9.6  |
| O15143 | Actin-related protein 2/3 complex subunit 1B                                | 1.27 | NA    | NA      | 2  | 9.4  |
| Q07020 | 60S ribosomal protein L18                                                   | 1.27 | 0.071 | 7.4E-03 | 4  | 25.0 |
| P08134 | Rho-related GTP-binding protein RhoC                                        | 1.26 | 0.039 | 4.5E-04 | 3  | 10.4 |
| P56192 | Methionine-tRNA ligase, cytoplasmic                                         | 1.26 | NA    | NA      | 2  | 3.8  |
| Q86VP6 | Cullin-associated NEDD8-dissociated protein 1                               | 1.26 | 0.183 | 2.9E-01 | 4  | 3.7  |
| P26373 | 60S ribosomal protein L13                                                   | 1.26 | 0.169 | 6.0E-02 | 4  | 19.4 |
| P30533 | Alpha-2-macroglobulin receptor-associated protein                           | 1.26 | 0.191 | 4.5E-01 | 3  | 8.1  |
| Q14683 | Structural maintenance of chromosomes protein 1A                            | 1.25 | 0.269 | 1.6E-01 | 4  | 3.1  |
| Q9Y3U8 | 60S ribosomal protein L36                                                   | 1.25 | 0.182 | 4.1E-02 | 4  | 30.5 |
| P09525 | Annexin A4                                                                  | 1.25 | 0.271 | 2.0E-01 | 6  | 16.0 |
| Q9P2E9 | Ribosome-binding protein 1                                                  | 1.25 | 0.405 | 1.3E-01 | 10 | 7.8  |
| O75323 | Protein NipSnap homolog 2                                                   | 1.24 | NA    | NA      | 2  | 6.6  |
| O00303 | Eukaryotic translation initiation factor 3 subunit F                        | 1.24 | NA    | NA      | 2  | 9.8  |
| P02790 | Hemopexin                                                                   | 1.24 | 0.111 | 1.3E-02 | 3  | 6.3  |
| P49207 | 60S ribosomal protein L34                                                   | 1.24 | 0.237 | 4.2E-01 | 3  | 20.5 |
| P50402 | Emerin                                                                      | 1.23 | 0.309 | 2.1E-01 | 5  | 17.7 |
| P62269 | 40S ribosomal protein S18                                                   | 1.23 | 0.172 | 5.5E-02 | 6  | 28.9 |
| P27348 | 14-3-3 protein theta                                                        | 1.22 | 0.117 | 2.2E-01 | 3  | 12.2 |
| Q81WB7 | WD repeat and FYVE domain-containing protein 1                              | 1.22 | NA    | NA      | 2  | 5.1  |
| Q92598 | Heat shock protein 105 kDa                                                  | 1.21 | 0.186 | 2.5E-01 | 3  | 3.3  |
| Q15293 | Reticulocalbin-1                                                            | 1.21 | 0.181 | 2.2E-01 | 4  | 10.3 |
| Q07960 | Rho GTPase-activating protein 1                                             | 1.21 | NA    | NA      | 2  | 4.6  |
| P08237 | ATP-dependent 6-phosphofructokinase, muscle type                            | 1.21 | 0.096 | 2.4E-01 | 5  | 8.2  |
| Q14980 | Nuclear mitotic apparatus protein 1                                         | 1.20 | 0.092 | 2.6E-02 | 7  | 4.6  |
| Q9P2R7 | Succinyl-CoA ligase [ADP-forming] subunit beta, mitochondrial               | 1.20 | NA    | NA      | 2  | 3.7  |
| P26368 | Splicing factor U2AF 65 kDa subunit                                         | 1.20 | NA    | NA      | 2  | 3.8  |
| P15586 | N-acetylglucosamine-6-sulfatase                                             | 1.20 | NA    | NA      | 2  | 3.3  |
| Q16762 | Thiosulfate sulfurtransferase                                               | 1.20 | NA    | NA      | 2  | 10.8 |
| P62917 | 60S ribosomal protein L8                                                    | 1.19 | NA    | NA      | 2  | 10.5 |
| P36873 | Serine/threonine-protein phosphatase PP1-gamma catalytic subunit            | 1.19 | NA    | NA      | 2  | 5.9  |
| P17980 | 26S protease regulatory subunit 6A                                          | 1.19 | 0.052 | 6.9E-02 | 3  | 7.5  |
| P62318 | Small nuclear ribonucleoprotein Sm D3                                       | 1.19 | 0.063 | 4.2E-02 | 3  | 31.7 |
| P54727 | UV excision repair protein RAD23 homolog B                                  | 1.19 | 0.235 | 3.6E-01 | 5  | 10.8 |
| P61421 | V-type proton ATPase subunit d 1                                            | 1.18 | 0.142 | 1.3E-01 | 3  | 7.7  |
| P54136 | Arginine-tRNA ligase, cytoplasmic                                           | 1.18 | 0.236 | 2.1E-01 | 5  | 8.2  |
| Q86U42 | Polyadenylate-binding protein 2                                             | 1.18 | NA    | NA      | 2  | 5.9  |
| P14314 | Glucosidase 2 subunit beta                                                  | 1.18 | 0.278 | 2.1E-01 | 10 | 12.3 |
| P51572 | B-cell receptor-associated protein 31                                       | 1.18 | 0.160 | 3.0E-01 | 7  | 25.6 |
| P50914 | 60S ribosomal protein L14                                                   | 1.17 | NA    | NA      | 2  | 10.7 |
| P0CG29 | Glutathione S-transferase theta-2                                           | 1.17 | NA    | NA      | 2  | 7.8  |
| P48047 | ATP synthase subunit O, mitochondrial                                       | 1.17 | 0.160 | 1.7E-01 | 6  | 34.3 |

Table S8-Sample UM23

|        |                                                                                   |      |        |         |    |      |
|--------|-----------------------------------------------------------------------------------|------|--------|---------|----|------|
| P30519 | Heme oxygenase 2                                                                  | 1.17 | NA     | NA      | 2  | 7.0  |
| P43686 | 26S protease regulatory subunit 6B                                                | 1.17 | NA     | NA      | 2  | 5.0  |
| Q53H12 | Acylglycerol kinase, mitochondrial                                                | 1.17 | NA     | NA      | 2  | 5.0  |
| P62987 | Ubiquitin-60S ribosomal protein L40                                               | 1.16 | 0.179  | 2.4E-02 | 7  | 46.1 |
| P15880 | 40S ribosomal protein S2                                                          | 1.16 | 0.613  | 3.2E-01 | 6  | 21.8 |
| P55265 | Double-stranded RNA-specific adenosine deaminase                                  | 1.16 | NA     | NA      | 2  | 1.9  |
| Q9Y2W1 | Thyroid hormone receptor-associated protein 3                                     | 1.16 | 0.394  | 7.0E-01 | 4  | 4.4  |
| P02766 | Transthyretin                                                                     | 1.16 | NA     | NA      | 2  | 12.9 |
| Q12874 | Splicing factor 3A subunit 3                                                      | 1.16 | 0.485  | 5.7E-01 | 3  | 5.8  |
| P50454 | Serpin H1                                                                         | 1.15 | 0.082  | 4.5E-01 | 3  | 8.1  |
| Q5SSJ5 | Heterochromatin protein 1-binding protein 3                                       | 1.15 | 0.157  | 3.8E-01 | 3  | 6.7  |
| P13073 | Cytochrome c oxidase subunit 4 isoform 1, mitochondrial                           | 1.15 | 0.119  | 2.1E-01 | 3  | 19.5 |
| Q5JRX3 | Presequence protease, mitochondrial                                               | 1.15 | NA     | NA      | 2  | 3.2  |
| P05198 | Eukaryotic translation initiation factor 2 subunit 1                              | 1.15 | 0.587  | 8.2E-01 | 3  | 9.5  |
| P30153 | Serine/threonine-protein phosphatase 2A 65 kDa regulatory subunit A alpha isoform | 1.15 | NA     | NA      | 2  | 4.8  |
| P01859 | Ig gamma-2 chain C region                                                         | 1.14 | NA     | NA      | 2  | 6.7  |
| Q15393 | Splicing factor 3B subunit 3                                                      | 1.14 | NA     | NA      | 2  | 2.1  |
| Q9NTZ6 | RNA-binding protein 12                                                            | 1.14 | NA     | NA      | 2  | 2.8  |
| Q13310 | Polyadenylate-binding protein 4                                                   | 1.14 | NA     | NA      | 2  | 4.7  |
| Q99442 | Translocation protein SEC62                                                       | 1.14 | 0.172  | 3.2E-01 | 3  | 7.3  |
| Q9Y411 | Unconventional myosin-Va                                                          | 1.13 | 0.502  | 5.2E-01 | 3  | 1.6  |
| Q95302 | Peptidyl-prolyl cis-trans isomerase FKBP9                                         | 1.13 | 0.620  | 4.0E-01 | 3  | 5.3  |
| P59998 | Actin-related protein 2/3 complex subunit 4                                       | 1.13 | 0.205  | 6.8E-01 | 3  | 16.1 |
| P01876 | Ig alpha-1 chain C region                                                         | 1.13 | 0.081  | 1.1E-01 | 3  | 10.8 |
| P19971 | Thymidine phosphorylase                                                           | 1.13 | 0.301  | 6.0E-01 | 3  | 7.9  |
| Q13347 | Eukaryotic translation initiation factor 3 subunit I                              | 1.13 | NA     | NA      | 2  | 6.8  |
| P54652 | Heat shock-related 70 kDa protein 2                                               | 1.13 | 0.126  | 4.3E-01 | 3  | 5.6  |
| P13667 | Protein disulfide-isomerase A4                                                    | 1.13 | 0.190  | 3.0E-01 | 4  | 6.4  |
| P14866 | Heterogeneous nuclear ribonucleoprotein L                                         | 1.13 | 0.046  | 8.4E-03 | 5  | 10.0 |
| P36578 | 60S ribosomal protein L4                                                          | 1.13 | 0.145  | 4.2E-01 | 4  | 10.1 |
| Q43598 | 2'-deoxynucleoside 5'-phosphate N-hydrolase 1                                     | 1.13 | NA     | NA      | 2  | 19.0 |
| P11940 | Polyadenylate-binding protein 1                                                   | 1.12 | 0.112  | 6.9E-02 | 6  | 12.3 |
| Q9Y262 | Eukaryotic translation initiation factor 3 subunit L                              | 1.12 | NA     | NA      | 2  | 3.4  |
| Q60568 | Procollagen-lysine 2-oxoglutarate 5-dioxygenase 3                                 | 1.11 | NA     | NA      | 2  | 4.2  |
| P46779 | 60S ribosomal protein L28                                                         | 1.11 | NA     | NA      | 2  | 13.1 |
| Q02878 | 60S ribosomal protein L6                                                          | 1.11 | 0.098  | 3.1E-01 | 6  | 20.8 |
| Q9BZQ8 | Protein Niban                                                                     | 1.11 | 0.199  | 5.3E-01 | 5  | 5.8  |
| P56556 | NADH dehydrogenase [ubiquinone] 1 alpha subcomplex subunit 6                      | 1.11 | NA     | NA      | 2  | 12.3 |
| Q5JTV8 | Torsin-1A-interacting protein 1                                                   | 1.11 | NA     | NA      | 2  | 4.5  |
| P23396 | 40S ribosomal protein S3                                                          | 1.10 | 0.141  | 9.2E-02 | 8  | 30.0 |
| Q02318 | Sterol 26-hydroxylase, mitochondrial                                              | 1.10 | NA     | NA      | 2  | 5.6  |
| P32969 | 60S ribosomal protein L9                                                          | 1.10 | NA     | NA      | 2  | 5.7  |
| P49593 | Protein phosphatase 1F                                                            | 1.10 | NA     | NA      | 2  | 7.5  |
| P61160 | Actin-related protein 2                                                           | 1.09 | 0.080  | 2.5E-01 | 3  | 9.9  |
| P13674 | Prolyl 4-hydroxylase subunit alpha-1                                              | 1.09 | NA     | NA      | 2  | 5.8  |
| P48681 | Nestin                                                                            | 1.08 | 0.957  | 7.7E-01 | 3  | 2.2  |
| P82909 | 28S ribosomal protein S36, mitochondrial                                          | 1.08 | 0.080  | 4.0E-01 | 3  | 36.9 |
| P05388 | 60S acidic ribosomal protein P0                                                   | 1.07 | NA     | NA      | 2  | 6.6  |
| P42765 | 3-ketoacyl-CoA thiolase, mitochondrial                                            | 1.07 | 0.334  | 6.8E-01 | 5  | 14.4 |
| Q9Y230 | RuvB-like 2                                                                       | 1.07 | NA     | NA      | 2  | 5.0  |
| P51159 | Ras-related protein Rab-27A                                                       | 1.06 | NA     | NA      | 2  | 10.4 |
| Q02543 | 60S ribosomal protein L18a                                                        | 1.06 | NA     | NA      | 2  | 10.2 |
| P11021 | 78 kDa glucose-regulated protein                                                  | 1.06 | 0.155  | 2.6E-01 | 18 | 24.0 |
| P46782 | 40S ribosomal protein S5                                                          | 1.06 | 0.236  | 6.6E-01 | 3  | 8.8  |
| Q12913 | Receptor-type tyrosine-protein phosphatase eta                                    | 1.06 | NA     | NA      | 2  | 2.2  |
| P20674 | Cytochrome c oxidase subunit 5A, mitochondrial                                    | 1.05 | NA     | NA      | 2  | 10.7 |
| P54709 | Sodium/potassium-transporting ATPase subunit beta-3                               | 1.05 | 1.663  | 8.9E-01 | 3  | 13.3 |
| Q13596 | Sorting nexin-1                                                                   | 1.05 | 0.535  | 7.2E-01 | 3  | 7.1  |
| P78371 | T-complex protein 1 subunit beta                                                  | 1.05 | 4.358  | 7.8E-01 | 6  | 13.6 |
| P06737 | Glycogen phosphorylase, liver form                                                | 1.05 | 0.475  | 7.4E-01 | 4  | 5.1  |
| P11586 | C-1-tetrahydrofolate synthase, cytoplasmic                                        | 1.05 | 0.242  | 4.5E-01 | 10 | 11.4 |
| Q00325 | Phosphate carrier protein, mitochondrial                                          | 1.04 | 0.286  | 5.1E-01 | 6  | 16.0 |
| P10644 | cAMP-dependent protein kinase type I-alpha regulatory subunit                     | 1.04 | 0.605  | 6.7E-01 | 3  | 7.6  |
| P22307 | Non-specific lipid-transfer protein                                               | 1.04 | NA     | NA      | 2  | 3.1  |
| O00410 | Importin-5                                                                        | 1.04 | NA     | NA      | 2  | 1.5  |
| P02545 | Prelamin-A/C                                                                      | 1.04 | 0.349  | 3.4E-01 | 40 | 52.7 |
| P43490 | Nicotinamide phosphoribosyltransferase                                            | 1.04 | 0.612  | 8.3E-01 | 3  | 5.1  |
| P11177 | Pyruvate dehydrogenase E1 component subunit beta, mitochondrial                   | 1.03 | NA     | NA      | 2  | 4.2  |
| P21912 | Succinate dehydrogenase [ubiquinone] iron-sulfur subunit, mitochondrial           | 1.03 | 0.555  | 7.5E-01 | 5  | 17.5 |
| Q95292 | Vesicle-associated membrane protein-associated protein B/C                        | 1.03 | NA     | NA      | 2  | 11.1 |
| Q16891 | Mitochondrial inner membrane protein                                              | 1.02 | 0.225  | 6.3E-01 | 10 | 16.5 |
| P60763 | Ras-related C3 botulinum toxin substrate 3                                        | 1.02 | 1.037  | 8.0E-01 | 3  | 14.1 |
| P14927 | Cytochrome b-c1 complex subunit 7                                                 | 1.02 | 0.591  | 8.5E-01 | 3  | 28.8 |
| P07237 | Protein disulfide-isomerase                                                       | 1.02 | 0.311  | 8.9E-01 | 18 | 30.7 |
| O75964 | ATP synthase subunit g, mitochondrial                                             | 1.02 | NA     | NA      | 2  | 27.2 |
| P62899 | 60S ribosomal protein L31                                                         | 1.02 | NA     | NA      | 2  | 13.6 |
| P09496 | Claathrin light chain A                                                           | 1.01 | 0.020  | 5.8E-01 | 4  | 12.9 |
| P09543 | 2',3'-cyclic-nucleotide 3'-phosphodiesterase                                      | 1.01 | 3.544  | 8.2E-01 | 8  | 18.3 |
| P42766 | 60S ribosomal protein L35                                                         | 1.01 | NA     | NA      | 2  | 15.4 |
| Q96TC7 | Regulator of microtubule dynamics protein 3                                       | 1.01 | NA     | NA      | 2  | 4.0  |
| P84103 | Serine/arginine-rich splicing factor 3                                            | 1.01 | 1.220  | 9.5E-01 | 3  | 20.7 |
| Q15075 | Early endosome antigen 1                                                          | 1.01 | NA     | NA      | 2  | 1.3  |
| Q14980 | Exportin-1                                                                        | 1.01 | NA     | NA      | 2  | 2.2  |
| Q9NSD9 | Phenylalanine--tRNA ligase beta subunit                                           | 1.01 | 0.678  | 9.6E-01 | 3  | 4.9  |
| Q15717 | ELAV-like protein 1                                                               | 1.00 | 0.227  | 9.8E-01 | 3  | 15.3 |
| P18124 | 60S ribosomal protein L7                                                          | 1.00 | 0.451  | 9.7E-01 | 5  | 16.9 |
| Q8N5K1 | CDGSH iron-sulfur domain-containing protein 2                                     | 1.00 | 0.004  | 4.1E-01 | 3  | 15.6 |
| P20645 | Cation-dependent mannose-6-phosphate receptor                                     | 0.99 | NA     | NA      | 2  | 10.5 |
| O75832 | 26S proteasome non-ATPase regulatory subunit 10                                   | 0.99 | NA     | NA      | 2  | 12.8 |
| O75306 | NADH dehydrogenase [ubiquinone] iron-sulfur protein 2, mitochondrial              | 0.99 | 0.413  | 9.3E-01 | 5  | 12.5 |
| Q9NTJ5 | Phosphatidylinositol phosphatase SAC1                                             | 0.99 | 0.639  | 9.0E-01 | 3  | 5.8  |
| P39023 | 60S ribosomal protein L3                                                          | 0.99 | NA     | NA      | 2  | 6.9  |
| P62714 | Serine/threonine-protein phosphatase 2A catalytic subunit beta isoform            | 0.99 | NA     | NA      | 2  | 6.1  |
| P26640 | Valine--tRNA ligase                                                               | 0.99 | 0.269  | 9.6E-01 | 3  | 2.8  |
| P14868 | Aspartate--tRNA ligase, cytoplasmic                                               | 0.99 | 2.023  | 9.3E-01 | 6  | 13.8 |
| Q96AE4 | Far upstream element-binding protein 1                                            | 0.98 | 0.207  | 8.5E-01 | 4  | 6.1  |
| P06576 | ATP synthase subunit beta, mitochondrial                                          | 0.98 | 0.458  | 5.9E-01 | 13 | 33.6 |
| P62081 | 40S ribosomal protein S7                                                          | 0.98 | NA     | NA      | 2  | 8.8  |
| Q9BS26 | Endoplasmic reticulum resident protein 44                                         | 0.98 | 0.233  | 8.3E-01 | 4  | 10.1 |
| P04440 | HLA class II histocompatibility antigen, DP beta 1 chain                          | 0.97 | NA     | NA      | 2  | 7.8  |
| Q9BRX8 | Redox-regulatory protein FAM213A                                                  | 0.97 | NA     | NA      | 2  | 9.2  |
| P62701 | 40S ribosomal protein S4, X isoform                                               | 0.97 | 0.098  | 7.6E-01 | 6  | 20.2 |
| Q96C86 | m7GpppX diphosphatase                                                             | 0.97 | NA     | NA      | 2  | 8.3  |
| P48643 | T-complex protein 1 subunit epsilon                                               | 0.96 | 1.214  | 8.1E-01 | 9  | 17.6 |
| Q9UKM9 | RNA-binding protein Raly                                                          | 0.96 | NA     | NA      | 2  | 6.2  |
| P00403 | Cytochrome c oxidase subunit 2                                                    | 0.96 | NA     | NA      | 2  | 7.5  |
| P46940 | Ras GTPase-activating-like protein IQGAP1                                         | 0.96 | 0.148  | 7.9E-01 | 4  | 3.1  |
| Q99873 | Protein arginine N-methyltransferase 1                                            | 0.96 | NA     | NA      | 2  | 6.4  |
| P49748 | Very long-chain specific acyl-CoA dehydrogenase, mitochondrial                    | 0.95 | 0.458  | 5.2E-01 | 7  | 11.5 |
| Q9GZY8 | Mitochondrial fission factor                                                      | 0.95 | 0.106  | 4.4E-01 | 3  | 8.5  |
| P24539 | ATP synthase F(0) complex subunit B1, mitochondrial                               | 0.95 | NA     | NA      | 2  | 9.0  |
| Q13151 | Heterogeneous nuclear ribonucleoprotein A0                                        | 0.95 | 54.417 | 8.2E-01 | 3  | 7.5  |
| O14773 | Tripeptidyl-peptidase 1                                                           | 0.94 | 0.162  | 5.4E-01 | 3  | 6.2  |
| P36955 | Pigment epithelium-derived factor                                                 | 0.94 | 2.698  | 7.6E-01 | 3  | 8.1  |
| Q9BR76 | Coronin-1B                                                                        | 0.94 | NA     | NA      | 2  | 3.9  |

Table S8-Sample UM23

|        |                                                                                                                   |      |       |         |    |      |
|--------|-------------------------------------------------------------------------------------------------------------------|------|-------|---------|----|------|
| Q6P2Q9 | Pre-mRNA-processing-splicing factor 8                                                                             | 0.94 | NA    | NA      | 2  | 0.8  |
| O60313 | Dynamin-like 120 kDa protein, mitochondrial                                                                       | 0.94 | 0.175 | 6.6E-01 | 6  | 7.4  |
| Q13200 | 26S proteasome non-ATPase regulatory subunit 2                                                                    | 0.94 | 0.197 | 5.6E-01 | 4  | 4.2  |
| Q8IZP0 | Abl interactor 1                                                                                                  | 0.94 | NA    | NA      | 2  | 4.9  |
| P14625 | Endoplasmic reticulum chaperone                                                                                   | 0.94 | 0.101 | 1.3E-01 | 16 | 19.2 |
| P55072 | Transitional endoplasmic reticulum ATPase                                                                         | 0.93 | 0.114 | 3.1E-01 | 13 | 17.5 |
| O75521 | Enoyl-CoA delta isomerase 2, mitochondrial                                                                        | 0.93 | NA    | NA      | 2  | 5.6  |
| P55884 | Eukaryotic translation initiation factor 3 subunit B                                                              | 0.93 | 0.297 | 5.5E-01 | 3  | 5.3  |
| P61163 | Alpha-centractin                                                                                                  | 0.93 | NA    | NA      | 2  | 7.4  |
| P63208 | S-phase kinase-associated protein 1                                                                               | 0.92 | NA    | NA      | 2  | 12.3 |
| P09669 | Cytochrome c oxidase subunit 6C                                                                                   | 0.92 | NA    | NA      | 2  | 20.0 |
| Q15365 | Poly(rC)-binding protein 1                                                                                        | 0.92 | NA    | NA      | 2  | 7.6  |
| O95168 | NADH dehydrogenase [ubiquinone] 1 beta subcomplex subunit 4                                                       | 0.92 | NA    | NA      | 2  | 17.1 |
| O00203 | AP-3 complex subunit beta-1                                                                                       | 0.91 | NA    | NA      | 2  | 2.7  |
| P62805 | Histone H4                                                                                                        | 0.91 | 0.085 | 7.4E-03 | 8  | 52.4 |
| P07858 | Cathepsin B                                                                                                       | 0.91 | 1.480 | 5.0E-01 | 4  | 13.0 |
| P67936 | Tropomyosin alpha-4 chain                                                                                         | 0.91 | 0.272 | 5.5E-01 | 9  | 28.6 |
| P46781 | 40S ribosomal protein S9                                                                                          | 0.91 | 0.090 | 1.5E-01 | 5  | 18.0 |
| Q9Y3Z3 | Deoxynucleoside triphosphate triphosphohydrolase SAMHD1                                                           | 0.91 | 0.040 | 2.1E-01 | 4  | 7.2  |
| P07203 | Glutathione peroxidase 1                                                                                          | 0.90 | NA    | NA      | 2  | 5.9  |
| Q9UHD8 | Septin-9                                                                                                          | 0.90 | 0.164 | 5.0E-01 | 3  | 5.8  |
| P28065 | Proteasome subunit beta type-9                                                                                    | 0.90 | NA    | NA      | 2  | 10.0 |
| O43242 | 26S proteasome non-ATPase regulatory subunit 3                                                                    | 0.89 | NA    | NA      | 2  | 3.0  |
| O75396 | Vesicle-trafficking protein SEC22b                                                                                | 0.89 | 0.502 | 5.6E-01 | 5  | 28.8 |
| Q15691 | Microtubule-associated protein RP/EB family member 1                                                              | 0.89 | 0.613 | 4.0E-01 | 4  | 9.7  |
| P61225 | Ras-related protein Rap-2b                                                                                        | 0.89 | 0.145 | 1.6E-01 | 3  | 16.4 |
| P78527 | DNA-dependent protein kinase catalytic subunit                                                                    | 0.89 | 0.361 | 3.3E-01 | 7  | 1.6  |
| P53992 | Protein transport protein Sec24C                                                                                  | 0.89 | NA    | NA      | 2  | 2.0  |
| Q13162 | Peroxisomal protein PEX1                                                                                          | 0.88 | NA    | NA      | 2  | 8.9  |
| O43707 | Alpha-actinin-4                                                                                                   | 0.88 | 0.044 | 7.6E-03 | 15 | 19.2 |
| P35606 | Coatomer subunit beta'                                                                                            | 0.88 | NA    | NA      | 2  | 2.1  |
| Q00765 | Receptor expression-enhancing protein 5                                                                           | 0.88 | 0.478 | 5.4E-01 | 3  | 10.6 |
| P0C0S5 | Histone H2A.Z                                                                                                     | 0.88 | NA    | NA      | 2  | 18.8 |
| P05107 | Integrin beta-2                                                                                                   | 0.88 | 0.085 | 3.2E-01 | 4  | 6.0  |
| P49368 | T-complex protein 1 subunit gamma                                                                                 | 0.87 | 0.059 | 7.8E-03 | 6  | 11.4 |
| P36543 | V-type proton ATPase subunit E 1                                                                                  | 0.87 | 0.182 | 4.3E-01 | 4  | 18.6 |
| Q93050 | V-type proton ATPase 116 kDa subunit isoform 1                                                                    | 0.87 | NA    | NA      | 2  | 3.1  |
| Q7KZF4 | Staphylococcal nuclease domain-containing protein 1                                                               | 0.87 | NA    | NA      | 2  | 2.7  |
| Q15149 | Plectin                                                                                                           | 0.87 | 0.048 | 3.7E-06 | 85 | 18.9 |
| Q9UBI6 | Guanine nucleotide-binding protein G(I)/G(S)/G(O) subunit gamma-12                                                | 0.86 | NA    | NA      | 2  | 34.7 |
| P25705 | ATP synthase subunit alpha, mitochondrial                                                                         | 0.86 | 0.080 | 1.6E-03 | 15 | 29.7 |
| P19367 | Hexokinase-1                                                                                                      | 0.86 | 0.595 | 2.9E-01 | 4  | 4.0  |
| P53618 | Coatomer subunit beta                                                                                             | 0.86 | NA    | NA      | 2  | 2.1  |
| Q15084 | Protein disulfide-isomerase A6                                                                                    | 0.86 | NA    | NA      | 2  | 6.8  |
| P54920 | Alpha-soluble NSF attachment protein                                                                              | 0.85 | 0.189 | 2.4E-01 | 4  | 14.2 |
| P43307 | Translocon-associated protein subunit alpha                                                                       | 0.85 | NA    | NA      | 2  | 6.6  |
| Q8LZ83 | Aldehyde dehydrogenase family 16 member A1                                                                        | 0.85 | NA    | NA      | 2  | 3.0  |
| P50991 | T-complex protein 1 subunit delta                                                                                 | 0.85 | 0.205 | 3.4E-01 | 6  | 12.2 |
| Q8N1G4 | Leucine-rich repeat-containing protein 47                                                                         | 0.84 | 0.099 | 4.1E-01 | 3  | 6.7  |
| Q04843 | Dolichyl-diphosphooligosaccharide--protein glycosyltransferase subunit 1                                          | 0.84 | 0.070 | 2.0E-02 | 9  | 16.3 |
| P67870 | Casein kinase II subunit beta                                                                                     | 0.84 | NA    | NA      | 2  | 10.2 |
| P62244 | 40S ribosomal protein S15a                                                                                        | 0.84 | 0.359 | 3.5E-01 | 3  | 18.5 |
| P40429 | 60S ribosomal protein L13a                                                                                        | 0.84 | NA    | NA      | 2  | 9.9  |
| P27824 | Calnexin                                                                                                          | 0.84 | 0.294 | 1.9E-01 | 11 | 20.3 |
| P35221 | Catenin alpha-1                                                                                                   | 0.83 | 0.178 | 1.9E-01 | 7  | 7.7  |
| Q99816 | Tumor susceptibility gene 101 protein                                                                             | 0.83 | NA    | NA      | 2  | 5.4  |
| Q16695 | Histone H3.1t                                                                                                     | 0.83 | 0.037 | 1.8E-04 | 4  | 21.3 |
| Q99584 | Protein S100-A13                                                                                                  | 0.83 | 0.142 | 1.1E-01 | 4  | 30.6 |
| P08559 | Pyruvate dehydrogenase E1 component subunit alpha, somatic form, mitochondrial                                    | 0.82 | NA    | NA      | 2  | 5.4  |
| Q05682 | Caldesmon                                                                                                         | 0.82 | 0.348 | 4.3E-01 | 6  | 11.0 |
| P08174 | Complement decay-accelerating factor                                                                              | 0.82 | NA    | NA      | 2  | 4.5  |
| P53621 | Coatomer subunit alpha                                                                                            | 0.82 | 0.316 | 3.7E-01 | 4  | 3.8  |
| Q6NUK1 | Calcium-binding mitochondrial carrier protein SCaMC-1                                                             | 0.82 | NA    | NA      | 2  | 3.4  |
| P50990 | T-complex protein 1 subunit theta                                                                                 | 0.82 | 0.038 | 6.8E-06 | 11 | 18.8 |
| P55060 | Exportin-2                                                                                                        | 0.81 | NA    | NA      | 2  | 1.6  |
| Q9BX66 | Sorbin and SH3 domain-containing protein 1                                                                        | 0.81 | NA    | NA      | 2  | 1.9  |
| Q13561 | Dynactin subunit 2                                                                                                | 0.81 | 0.209 | 1.3E-01 | 4  | 8.2  |
| Q726Z7 | E3 ubiquitin-protein ligase HUWE1                                                                                 | 0.81 | NA    | NA      | 2  | 0.5  |
| Q93009 | Ubiquitin carboxyl-terminal hydrolase 7                                                                           | 0.81 | NA    | NA      | 2  | 2.1  |
| Q99832 | T-complex protein 1 subunit eta                                                                                   | 0.80 | 0.030 | 2.6E-03 | 4  | 8.1  |
| P37837 | Transaldolase                                                                                                     | 0.80 | 1.042 | 6.1E-01 | 3  | 6.8  |
| Q92522 | Histone H1x                                                                                                       | 0.80 | NA    | NA      | 2  | 11.7 |
| P17931 | Galectin-3                                                                                                        | 0.79 | 0.212 | 1.3E-01 | 6  | 28.4 |
| P30508 | HLA class I histocompatibility antigen, Cw-12 alpha chain                                                         | 0.79 | NA    | NA      | 2  | 7.1  |
| O94925 | Glutaminase kidney isoform, mitochondrial                                                                         | 0.79 | NA    | NA      | 2  | 3.7  |
| P02774 | Vitamin D-binding protein                                                                                         | 0.79 | 0.242 | 3.2E-01 | 3  | 5.7  |
| P10515 | Dihydropyridyllysine-residue acetyltransferase component of pyruvate dehydrogenase complex, mitochondrial         | 0.79 | 0.364 | 4.1E-01 | 3  | 4.0  |
| Q969X5 | Endoplasmic reticulum-Golgi intermediate compartment protein 1                                                    | 0.78 | 0.024 | 5.3E-02 | 3  | 11.0 |
| Q53GG5 | PDZ and LIM domain protein 3                                                                                      | 0.78 | NA    | NA      | 2  | 9.1  |
| Q9UMX5 | Neudessin                                                                                                         | 0.78 | NA    | NA      | 2  | 16.9 |
| P61026 | Ras-related protein Rab-10                                                                                        | 0.77 | NA    | NA      | 2  | 9.0  |
| Q8WUM4 | Programmed cell death 6-interacting protein                                                                       | 0.77 | 0.060 | 8.4E-03 | 6  | 5.4  |
| P06899 | Histone H2B type 1-J                                                                                              | 0.76 | NA    | NA      | 2  | 7.9  |
| Q86UP2 | Kinectin                                                                                                          | 0.76 | 0.164 | 2.6E-02 | 7  | 6.4  |
| Q9BTV4 | Transmembrane protein 43                                                                                          | 0.76 | NA    | NA      | 2  | 6.3  |
| Q14697 | Neutral alpha-glucosidase AB                                                                                      | 0.76 | 0.084 | 6.7E-03 | 11 | 11.5 |
| P24752 | Acetyl-CoA acetyltransferase, mitochondrial                                                                       | 0.76 | 0.828 | 2.4E-01 | 4  | 12.2 |
| P33176 | Kinesin-1 heavy chain                                                                                             | 0.75 | NA    | NA      | 2  | 2.4  |
| P26038 | Moesin                                                                                                            | 0.74 | 0.072 | 9.2E-04 | 6  | 9.0  |
| Q03252 | Lamin-B2                                                                                                          | 0.74 | 0.033 | 4.7E-07 | 19 | 32.0 |
| P31943 | Heterogeneous nuclear ribonucleoprotein H                                                                         | 0.73 | 0.135 | 9.3E-02 | 3  | 8.0  |
| Q12797 | Aspartyl/asparaginyl beta-hydroxylase                                                                             | 0.73 | 0.184 | 1.4E-01 | 4  | 4.7  |
| P07305 | Histone H1.0                                                                                                      | 0.73 | 0.194 | 4.9E-01 | 3  | 16.0 |
| P35222 | Catenin beta-1                                                                                                    | 0.73 | 0.097 | 4.1E-02 | 6  | 9.1  |
| P37108 | Signal recognition particle 14 kDa protein                                                                        | 0.73 | 0.279 | 3.0E-01 | 3  | 22.8 |
| O60716 | Catenin delta-1                                                                                                   | 0.72 | NA    | NA      | 2  | 2.0  |
| P22695 | Cytochrome b-c1 complex subunit 2, mitochondrial                                                                  | 0.72 | 0.045 | 6.4E-04 | 4  | 12.1 |
| P16615 | Sarcoplasmic/endoplasmic reticulum calcium ATPase 2                                                               | 0.71 | 0.073 | 2.1E-04 | 8  | 8.5  |
| Q9Y240 | C-type lectin domain family 11 member A                                                                           | 0.71 | 0.205 | 5.1E-02 | 4  | 14.2 |
| Q14108 | Lysosome membrane protein 2                                                                                       | 0.71 | 0.058 | 8.2E-03 | 3  | 6.3  |
| P13987 | CD59 glycoprotein                                                                                                 | 0.71 | NA    | NA      | 2  | 15.6 |
| Q94979 | Protein transport protein Sec31A                                                                                  | 0.71 | 0.169 | 5.4E-02 | 6  | 5.7  |
| Q7L5N1 | COP9 signalosome complex subunit 6                                                                                | 0.70 | NA    | NA      | 2  | 6.7  |
| P17987 | T-complex protein 1 subunit alpha                                                                                 | 0.70 | 0.075 | 1.1E-02 | 5  | 9.4  |
| P48735 | Isocitrate dehydrogenase [NADP], mitochondrial                                                                    | 0.70 | 0.057 | 3.9E-03 | 5  | 12.4 |
| P51812 | Ribosomal protein S6 kinase alpha-3                                                                               | 0.69 | NA    | NA      | 2  | 2.3  |
| Q14950 | Myosin regulatory light chain 12B                                                                                 | 0.69 | NA    | NA      | 2  | 12.2 |
| P47756 | F-actin-capping protein subunit beta                                                                              | 0.69 | 0.141 | 7.0E-02 | 4  | 14.4 |
| P63261 | Actin, cytoplasmic 2                                                                                              | 0.69 | 0.041 | 8.2E-08 | 6  | 24.8 |
| P23634 | Plasma membrane calcium-transporting ATPase 4                                                                     | 0.69 | 0.073 | 1.0E-02 | 4  | 4.9  |
| P06396 | Gelsolin                                                                                                          | 0.68 | 0.106 | 3.3E-03 | 10 | 12.5 |
| P26196 | Probable ATP-dependent RNA helicase DDX6                                                                          | 0.68 | NA    | NA      | 2  | 4.1  |
| P36957 | Dihydropyridyllysine-residue succinyltransferase component of 2-oxoglutarate dehydrogenase complex, mitochondrial | 0.68 | 0.067 | 9.6E-04 | 4  | 9.9  |
| O00264 | Membrane-associated progesterone receptor component 1                                                             | 0.68 | 0.098 | 2.6E-03 | 4  | 15.9 |
| P21281 | V-type proton ATPase subunit B, brain isoform                                                                     | 0.68 | 0.076 | 1.1E-02 | 3  | 7.4  |

Table S8-Sample UM23

|        |                                                                              |      |       |         |    |      |
|--------|------------------------------------------------------------------------------|------|-------|---------|----|------|
| O00571 | ATP-dependent RNA helicase DDX3X                                             | 0.68 | 0.452 | 2.8E-01 | 3  | 5.7  |
| P04844 | Dolichyl-diphosphooligosaccharide-protein glycosyltransferase subunit 2      | 0.68 | 0.050 | 7.4E-03 | 3  | 5.4  |
| P00387 | NADH-cytochrome b5 reductase 3                                               | 0.68 | 0.124 | 1.1E-02 | 4  | 14.6 |
| P00390 | Glutathione reductase, mitochondrial                                         | 0.67 | NA    | NA      | 2  | 6.3  |
| Q81X12 | Cell division cycle and apoptosis regulator protein 1                        | 0.67 | NA    | NA      | 2  | 2.3  |
| Q16698 | 2,4-dienoyl-CoA reductase, mitochondrial                                     | 0.67 | NA    | NA      | 2  | 8.7  |
| P43121 | Cell surface glycoprotein MUC18                                              | 0.67 | 0.096 | 1.2E-01 | 4  | 6.8  |
| P38606 | V-type proton ATPase catalytic subunit A                                     | 0.67 | NA    | NA      | 2  | 3.2  |
| P30837 | Aldehyde dehydrogenase X, mitochondrial                                      | 0.67 | 0.157 | 3.6E-02 | 5  | 14.1 |
| P13861 | cAMP-dependent protein kinase type II-alpha regulatory subunit               | 0.66 | 0.224 | 2.2E-01 | 4  | 13.9 |
| Q9H223 | EH domain-containing protein 4                                               | 0.66 | NA    | NA      | 2  | 3.0  |
| O75746 | Calcium-binding mitochondrial carrier protein Aralar1                        | 0.66 | 0.084 | 1.3E-02 | 4  | 5.8  |
| P39656 | Dolichyl-diphosphooligosaccharide-protein glycosyltransferase 48 kDa subunit | 0.65 | 0.108 | 1.3E-02 | 4  | 8.3  |
| P02511 | Alpha-crystallin B chain                                                     | 0.65 | 0.070 | 3.2E-03 | 6  | 35.4 |
| P00367 | Glutamate dehydrogenase 1, mitochondrial                                     | 0.64 | 0.065 | 3.4E-04 | 6  | 12.0 |
| P05023 | Sodium/potassium-transporting ATPase subunit alpha-1                         | 0.64 | 0.107 | 3.6E-03 | 5  | 5.9  |
| O75131 | Copine-3                                                                     | 0.64 | 0.106 | 2.7E-03 | 4  | 7.6  |
| P09497 | Clathrin light chain B                                                       | 0.64 | 0.116 | 1.2E-02 | 4  | 15.3 |
| P01903 | HLA class II histocompatibility antigen, DR alpha chain                      | 0.64 | 0.063 | 7.5E-02 | 3  | 14.6 |
| P07437 | Tubulin beta chain                                                           | 0.64 | NA    | NA      | 2  | 6.5  |
| P04179 | Superoxide dismutase [Mn], mitochondrial                                     | 0.63 | 0.250 | 2.8E-01 | 6  | 23.4 |
| Q9Y6N5 | Sulfide:quinone oxidoreductase, mitochondrial                                | 0.63 | 0.564 | 4.7E-01 | 3  | 6.7  |
| P47985 | Cytochrome b-c1 complex subunit Rieske, mitochondrial                        | 0.62 | NA    | NA      | 2  | 8.0  |
| P40763 | Signal transducer and activator of transcription 3                           | 0.62 | NA    | NA      | 2  | 3.4  |
| Q14558 | Phosphoribosyl pyrophosphate synthase-associated protein 1                   | 0.62 | NA    | NA      | 2  | 8.4  |
| P43304 | Glycerol-3-phosphate dehydrogenase, mitochondrial                            | 0.61 | NA    | NA      | 2  | 3.0  |
| P07099 | Epoxide hydrolase 1                                                          | 0.61 | 0.060 | 1.4E-05 | 8  | 14.5 |
| Q6DD88 | Atlastin-3                                                                   | 0.61 | 0.163 | 7.2E-02 | 4  | 7.2  |
| P35580 | Myosin-10                                                                    | 0.60 | 0.094 | 9.8E-04 | 13 | 7.5  |
| P31930 | Cytochrome b-c1 complex subunit 1, mitochondrial                             | 0.60 | NA    | NA      | 2  | 4.6  |
| P08571 | Monocyte differentiation antigen CD14                                        | 0.60 | NA    | NA      | 2  | 5.3  |
| Q02647 | Apolipoprotein A-I                                                           | 0.59 | 0.076 | 1.6E-05 | 5  | 18.0 |
| Q08722 | Leukocyte surface antigen CD47                                               | 0.59 | NA    | NA      | 2  | 5.9  |
| Q43175 | D-3-phosphoglycerate dehydrogenase                                           | 0.59 | NA    | NA      | 2  | 5.6  |
| P11413 | Glucose-6-phosphate 1-dehydrogenase                                          | 0.59 | 0.092 | 4.9E-02 | 3  | 5.4  |
| O75369 | Filamin-B                                                                    | 0.59 | 0.034 | 3.3E-08 | 11 | 5.6  |
| Q16775 | Hydroxyacylglutathione hydrolase, mitochondrial                              | 0.58 | NA    | NA      | 2  | 6.5  |
| Q9Y310 | tRNA-splicing ligase RtcB homolog                                            | 0.58 | 0.061 | 1.5E-02 | 3  | 6.7  |
| P50570 | Dynamin-2                                                                    | 0.58 | NA    | NA      | 2  | 2.3  |
| Q92973 | Transportin-1                                                                | 0.57 | 0.111 | 6.9E-02 | 3  | 4.5  |
| P01871 | Ig mu chain C region                                                         | 0.57 | 0.046 | 1.9E-05 | 10 | 24.6 |
| P09417 | Dihydropteridine reductase                                                   | 0.57 | NA    | NA      | 2  | 12.3 |
| P01009 | Alpha-1-antitrypsin                                                          | 0.57 | 0.094 | 3.2E-04 | 7  | 17.2 |
| Q92599 | Septin-8                                                                     | 0.56 | NA    | NA      | 2  | 6.0  |
| Q9HDC9 | Adipocyte plasma membrane-associated protein                                 | 0.56 | 0.123 | 9.1E-03 | 4  | 12.3 |
| Q14956 | Transmembrane glycoprotein NMB                                               | 0.55 | 0.449 | 1.3E-01 | 4  | 8.9  |
| Q00610 | Clathrin heavy chain 1                                                       | 0.55 | 0.053 | 3.0E-08 | 18 | 12.4 |
| Q09666 | Neuroblast differentiation-associated protein AHNAK                          | 0.55 | 0.036 | 3.1E-11 | 67 | 9.8  |
| Q14204 | Cytoplasmic dynein 1 heavy chain 1                                           | 0.55 | 0.038 | 1.9E-13 | 21 | 4.4  |
| Q53GQ0 | Estradiol 17-beta-dehydrogenase 12                                           | 0.54 | NA    | NA      | 2  | 8.7  |
| Q9UHG3 | Prenylcysteine oxidase 1                                                     | 0.54 | NA    | NA      | 2  | 4.6  |
| P05091 | Aldehyde dehydrogenase, mitochondrial                                        | 0.53 | 0.287 | 1.6E-01 | 3  | 5.0  |
| Q02218 | 2-oxoglutarate dehydrogenase, mitochondrial                                  | 0.52 | 0.099 | 6.4E-04 | 5  | 5.5  |
| Q14203 | Dynactin subunit 1                                                           | 0.52 | 0.466 | 2.3E-01 | 4  | 3.9  |
| Q9JLA0 | Aspartyl aminopeptidase                                                      | 0.52 | NA    | NA      | 2  | 6.1  |
| P04217 | Alpha-1B-glycoprotein                                                        | 0.51 | NA    | NA      | 2  | 4.8  |
| P32004 | Neural cell adhesion molecule L1                                             | 0.51 | 0.118 | 9.3E-03 | 5  | 4.5  |
| P0C0L5 | Complement C4-B                                                              | 0.51 | NA    | NA      | 2  | 1.9  |
| P02652 | Apolipoprotein A-II                                                          | 0.51 | NA    | NA      | 2  | 17.0 |
| Q9BSD7 | Cancer-related nucleoside-triphosphatase                                     | 0.51 | NA    | NA      | 2  | 8.9  |
| P68371 | Tubulin beta-4B chain                                                        | 0.50 | 0.039 | 2.1E-09 | 3  | 9.9  |
| Q15019 | Septin-2                                                                     | 0.49 | 0.083 | 2.1E-03 | 4  | 13.9 |
| Q16181 | Septin-7                                                                     | 0.49 | 0.051 | 1.3E-06 | 5  | 11.7 |
| P32119 | Peroxiredoxin-2                                                              | 0.48 | 0.068 | 7.7E-06 | 6  | 31.3 |
| P04040 | Catalase                                                                     | 0.48 | 0.047 | 1.2E-02 | 3  | 6.3  |
| P17612 | cAMP-dependent protein kinase catalytic subunit alpha                        | 0.48 | NA    | NA      | 2  | 4.3  |
| Q9Y4L1 | Hypoxia up-regulated protein 1                                               | 0.48 | NA    | NA      | 2  | 2.5  |
| O75955 | Flotillin-1                                                                  | 0.48 | 0.140 | 7.5E-02 | 3  | 8.4  |
| P17643 | 5,6-dihydroxyindole-2-carboxylic acid oxidase                                | 0.48 | NA    | NA      | 2  | 3.7  |
| Q9HBL0 | Tensin-1                                                                     | 0.48 | 0.437 | 2.8E-01 | 3  | 3.2  |
| Q14192 | Four and a half LIM domains protein 2                                        | 0.47 | NA    | NA      | 2  | 7.9  |
| P08133 | Annexin A6                                                                   | 0.47 | 0.028 | 0.0E+00 | 32 | 48.3 |
| O00159 | Unconventional myosin-1c                                                     | 0.47 | 0.075 | 1.7E-06 | 11 | 10.1 |
| P05362 | Intercellular adhesion molecule 1                                            | 0.46 | 0.120 | 3.7E-02 | 3  | 7.9  |
| P50995 | Annexin A11                                                                  | 0.46 | 0.085 | 1.1E-04 | 6  | 12.1 |
| P21589 | 5'-nucleotidase                                                              | 0.46 | 0.486 | 4.6E-01 | 3  | 7.8  |
| Q7Z406 | Myosin-14                                                                    | 0.45 | 0.384 | 1.5E-01 | 4  | 2.6  |
| P09493 | Tropomyosin alpha-1 chain                                                    | 0.45 | 0.216 | 1.6E-03 | 5  | 14.8 |
| Q29974 | HLA class II histocompatibility antigen, DRB1-16 beta chain                  | 0.44 | NA    | NA      | 2  | 6.4  |
| Q95865 | N(G),N(G)-dimethylarginine dimethylaminohydrolase 2                          | 0.44 | NA    | NA      | 2  | 8.4  |
| P60660 | Myosin light polypeptide 6                                                   | 0.43 | 0.041 | 0.0E+00 | 9  | 58.3 |
| P12814 | Alpha-actinin-1                                                              | 0.43 | 0.044 | 7.3E-07 | 11 | 13.8 |
| Q969P0 | Immunoglobulin superfamily member 8                                          | 0.43 | NA    | NA      | 2  | 4.6  |
| P18206 | Vinculin                                                                     | 0.42 | 0.054 | 6.0E-10 | 14 | 14.2 |
| P40939 | Trifunctional enzyme subunit alpha, mitochondrial                            | 0.42 | 0.131 | 2.8E-02 | 7  | 10.2 |
| Q13557 | Calcium/calmodulin-dependent protein kinase type II subunit delta            | 0.42 | NA    | NA      | 2  | 4.2  |
| P06727 | Apolipoprotein A-IV                                                          | 0.42 | 0.106 | 8.1E-06 | 9  | 19.7 |
| O60645 | Exocyst complex component 3                                                  | 0.41 | NA    | NA      | 2  | 3.4  |
| P29992 | Guanine nucleotide-binding protein subunit alpha-11                          | 0.41 | NA    | NA      | 2  | 4.7  |
| Q14764 | Major vault protein                                                          | 0.41 | 0.087 | 1.6E-04 | 5  | 5.9  |
| Q94832 | Unconventional myosin-1d                                                     | 0.40 | 0.172 | 7.5E-03 | 4  | 4.2  |
| Q10588 | ADP-ribosyl cyclase/cyclic ADP-ribose hydrolase 2                            | 0.40 | NA    | NA      | 2  | 5.7  |
| Q94905 | Erlin-2                                                                      | 0.40 | 0.048 | 1.1E-07 | 5  | 12.1 |
| Q93052 | Lipoma-preferred partner                                                     | 0.40 | NA    | NA      | 2  | 3.4  |
| P62873 | Guanine nucleotide-binding protein G(I)/G(S)/G(T) subunit beta-1             | 0.39 | 0.108 | 2.0E-01 | 3  | 10.0 |
| Q9NVD7 | Alpha-parvin                                                                 | 0.39 | NA    | NA      | 2  | 4.3  |
| Q16363 | Laminin subunit alpha-4                                                      | 0.38 | 0.381 | 7.4E-02 | 4  | 2.5  |
| Q9NQ03 | Reticulon-4                                                                  | 0.37 | NA    | NA      | 2  | 2.3  |
| Q9NZN4 | EH domain-containing protein 2                                               | 0.37 | NA    | NA      | 2  | 3.5  |
| P00352 | Retinal dehydrogenase 1                                                      | 0.35 | NA    | NA      | 2  | 4.6  |
| Q15582 | Transforming growth factor-beta-induced protein ig-h3                        | 0.33 | NA    | NA      | 2  | 2.8  |
| Q86VB7 | Scavenger receptor cysteine-rich type 1 protein M130                         | 0.32 | NA    | NA      | 2  | 1.6  |
| P02452 | Collagen alpha-1(I) chain                                                    | 0.31 | NA    | NA      | 2  | 1.6  |
| P13671 | Complement component C6                                                      | 0.31 | NA    | NA      | 2  | 2.7  |
| P05787 | Keratin, type II cytoskeletal 8                                              | 0.30 | NA    | NA      | 2  | 3.9  |
| P04216 | Thy-1 membrane glycoprotein                                                  | 0.30 | NA    | NA      | 2  | 15.5 |
| Q9BSJ8 | Extended synaptotagmin-1                                                     | 0.30 | NA    | NA      | 2  | 1.8  |
| P22105 | Tenascin-X                                                                   | 0.30 | 0.102 | 9.5E-02 | 4  | 1.1  |
| P46939 | Utrophin                                                                     | 0.29 | NA    | NA      | 2  | 0.8  |
| P35611 | Alpha-adducin                                                                | 0.28 | 0.108 | 5.1E-02 | 3  | 5.8  |
| P22413 | Ectonucleotide pyrophosphatase/phosphodiesterase family member 1             | 0.27 | NA    | NA      | 2  | 2.3  |
| P61626 | Lysozyme C                                                                   | 0.27 | NA    | NA      | 2  | 12.8 |
| P16157 | Ankyrin-1                                                                    | 0.27 | 0.342 | 5.9E-02 | 3  | 2.2  |
| P07358 | Complement component C8 beta chain                                           | 0.25 | NA    | NA      | 2  | 2.0  |
| O94911 | ATP-binding cassette sub-family A member 8                                   | 0.25 | NA    | NA      | 2  | 1.2  |

Table S8-Sample UM23

|        |                                                                      |      |       |         |    |      |
|--------|----------------------------------------------------------------------|------|-------|---------|----|------|
| Q9BS40 | Latexin                                                              | 0.25 | 0.224 | 1.2E-01 | 3  | 16.7 |
| O94919 | Endonuclease domain-containing 1 protein                             | 0.25 | NA    | NA      | 2  | 6.2  |
| Q08431 | Lactadherin                                                          | 0.24 | NA    | NA      | 2  | 5.4  |
| P07197 | Neurofilament medium polypeptide                                     | 0.24 | NA    | NA      | 2  | 2.4  |
| Q01995 | Transgelin                                                           | 0.22 | 0.208 | 8.7E-02 | 4  | 19.4 |
| P07360 | Complement component C8 gamma chain                                  | 0.20 | NA    | NA      | 2  | 15.8 |
| P04196 | Histidine-rich glycoprotein                                          | 0.19 | NA    | NA      | 2  | 3.6  |
| Q9BUF5 | Tubulin beta-6 chain                                                 | 0.18 | NA    | NA      | 2  | 4.0  |
| P12277 | Creatine kinase B-type                                               | 0.16 | NA    | NA      | 2  | 4.7  |
| Q9BXN1 | Asporin                                                              | 0.16 | NA    | NA      | 2  | 2.9  |
| P24844 | Myosin regulatory light polypeptide 9                                | 0.15 | NA    | NA      | 2  | 12.2 |
| O14495 | Lipid phosphate phosphohydrolase 3                                   | 0.15 | NA    | NA      | 2  | 7.1  |
| P10745 | Retinol-binding protein 3                                            | 0.14 | 0.517 | 6.4E-02 | 3  | 2.4  |
| Q12805 | EGF-containing fibulin-like extracellular matrix protein 1           | 0.13 | NA    | NA      | 2  | 3.9  |
| P58166 | Inhibin beta E chain                                                 | 0.12 | NA    | NA      | 2  | 6.6  |
| P35243 | Recoverin                                                            | 0.12 | NA    | NA      | 2  | 10.5 |
| Q6NUJ6 | Chondroadherin-like protein                                          | 0.11 | NA    | NA      | 2  | 3.0  |
| P05186 | Alkaline phosphatase, tissue-nonspecific isozyme                     | 0.09 | 0.373 | 2.7E-01 | 3  | 5.5  |
| Q2UY09 | Collagen alpha-1(XVII) chain                                         | 0.08 | NA    | NA      | 2  | 1.4  |
| P08123 | Collagen alpha-2(I) chain                                            | 0.03 | NA    | NA      | 2  | 2.4  |
| Q9Y490 | Talin-1                                                              | 0.38 | 0.038 | 0.0E+00 | 22 | 10.5 |
| P00739 | Haptoglobin-related protein                                          | 0.38 | 0.082 | 3.2E-02 | 5  | 14.7 |
| Q9BQE3 | Tubulin alpha-1C chain                                               | 0.38 | 0.062 | 6.1E-13 | 11 | 25.4 |
| P00747 | Plasminogen                                                          | 0.37 | 0.229 | 2.0E-02 | 4  | 6.8  |
| Q9NZM1 | Myoferlin                                                            | 0.36 | 0.151 | 4.7E-05 | 9  | 5.4  |
| P35579 | Myosin-9                                                             | 0.36 | 0.046 | 1.8E-15 | 54 | 27.7 |
| Q14254 | Flotillin-2                                                          | 0.36 | 0.071 | 2.6E-02 | 3  | 6.8  |
| P26447 | Protein S100-A4                                                      | 0.36 | 0.109 | 1.1E-03 | 3  | 27.7 |
| P04899 | Guanine nucleotide-binding protein G(i) subunit alpha-2              | 0.35 | 0.174 | 1.9E-04 | 4  | 13.8 |
| Q6NZI2 | Polymerase I and transcript release factor                           | 0.34 | 0.130 | 1.9E-03 | 6  | 17.7 |
| P05556 | Integrin beta-1                                                      | 0.34 | 0.036 | 5.5E-11 | 6  | 8.0  |
| Q07954 | Prolow-density lipoprotein receptor-related protein 1                | 0.34 | 0.161 | 4.4E-03 | 7  | 2.1  |
| P55084 | Trifunctional enzyme subunit beta, mitochondrial                     | 0.33 | 0.089 | 5.4E-05 | 4  | 6.8  |
| Q02549 | Spectrin alpha chain, erythrocytic 1                                 | 0.33 | 0.223 | 7.7E-03 | 5  | 3.0  |
| P00450 | Ceruloplasmin                                                        | 0.28 | 0.065 | 3.2E-13 | 11 | 12.1 |
| Q9BXM0 | Periaxin                                                             | 0.28 | 0.199 | 9.9E-04 | 6  | 2.9  |
| Q63ZY3 | KN motif and ankyrin repeat domain-containing protein 2              | 0.28 | 0.221 | 3.4E-02 | 3  | 5.3  |
| Q02952 | A-kinase anchor protein 12                                           | 0.28 | 0.077 | 2.2E-07 | 19 | 12.8 |
| P02751 | Fibronectin                                                          | 0.25 | 0.108 | 1.7E-03 | 12 | 5.9  |
| P07942 | Laminin subunit beta-1                                               | 0.23 | 0.167 | 4.0E-04 | 4  | 2.0  |
| P01024 | Complement C3                                                        | 0.23 | 0.179 | 6.1E-06 | 14 | 8.2  |
| P12111 | Collagen alpha-3(VI) chain                                           | 0.22 | 0.051 | 0.0E+00 | 31 | 10.7 |
| P02679 | Fibrinogen gamma chain                                               | 0.22 | 0.141 | 6.9E-05 | 9  | 19.0 |
| P12110 | Collagen alpha-2(VI) chain                                           | 0.22 | 0.076 | 2.2E-10 | 8  | 8.5  |
| P12109 | Collagen alpha-1(VI) chain                                           | 0.21 | 0.087 | 3.5E-09 | 9  | 9.8  |
| P07355 | Annexin A2                                                           | 0.21 | 0.039 | 0.0E+00 | 22 | 55.8 |
| P00167 | Cytochrome b5                                                        | 0.21 | 0.133 | 3.6E-05 | 3  | 35.8 |
| P46821 | Microtubule-associated protein 1B                                    | 0.21 | 0.204 | 2.2E-02 | 3  | 1.3  |
| Q13425 | Beta-2-syntrophin                                                    | 0.21 | 0.210 | 3.0E-02 | 4  | 6.7  |
| P27105 | Erythrocyte band 7 integral membrane protein                         | 0.21 | 0.094 | 6.9E-10 | 5  | 15.6 |
| P05164 | Myeloperoxidase                                                      | 0.21 | 0.318 | 2.4E-02 | 4  | 6.3  |
| Q01082 | Spectrin beta chain, non-erythrocytic 1                              | 0.21 | 0.044 | 0.0E+00 | 41 | 20.1 |
| Q13813 | Spectrin alpha chain, non-erythrocytic 1                             | 0.20 | 0.034 | 0.0E+00 | 60 | 26.5 |
| P39059 | Collagen alpha-1(XV) chain                                           | 0.20 | 0.127 | 9.3E-06 | 6  | 4.1  |
| Q16555 | Dihydropyrimidinase-related protein 2                                | 0.20 | 0.056 | 2.4E-12 | 5  | 9.4  |
| P21333 | Filamin-A                                                            | 0.20 | 0.045 | 0.0E+00 | 42 | 21.0 |
| Q43491 | Band 4.1-like protein 2                                              | 0.20 | 0.172 | 2.5E-05 | 4  | 4.9  |
| P09336 | Ubiquitin carboxyl-terminal hydrolase isozyme L1                     | 0.19 | 0.271 | 6.1E-03 | 3  | 19.3 |
| Q02649 | Apolipoprotein E                                                     | 0.19 | 0.076 | 1.8E-12 | 12 | 37.5 |
| P36269 | Gamma-glutamyltransferase 5                                          | 0.18 | 0.124 | 1.4E-02 | 3  | 6.1  |
| P11166 | Solute carrier family 2, facilitated glucose transporter member 1    | 0.18 | 0.092 | 1.6E-08 | 3  | 5.5  |
| P02749 | Beta-2-glycoprotein 1                                                | 0.18 | 0.123 | 2.3E-05 | 3  | 7.0  |
| P15088 | Mast cell carboxypeptidase A                                         | 0.18 | 0.153 | 4.0E-04 | 4  | 7.9  |
| P02675 | Fibrinogen beta chain                                                | 0.18 | 0.093 | 1.7E-11 | 11 | 27.1 |
| P98160 | Basement membrane-specific heparan sulfate proteoglycan core protein | 0.18 | 0.069 | 0.0E+00 | 33 | 8.8  |
| P02671 | Fibrinogen alpha chain                                               | 0.18 | 0.115 | 3.9E-07 | 7  | 9.6  |
| P39060 | Collagen alpha-1(XVIII) chain                                        | 0.18 | 0.090 | 2.0E-11 | 6  | 3.6  |
| P55268 | Laminin subunit beta-2                                               | 0.18 | 0.084 | 4.9E-13 | 12 | 7.7  |
| P60903 | Protein S100-A10                                                     | 0.16 | 0.130 | 1.1E-03 | 3  | 35.1 |
| P43320 | Beta-crystallin B2                                                   | 0.16 | 0.151 | 1.8E-02 | 3  | 15.6 |
| P11277 | Spectrin beta chain, erythrocytic                                    | 0.16 | 0.158 | 1.1E-04 | 8  | 4.5  |
| P01011 | Alpha-1-antichymotrypsin                                             | 0.16 | 0.101 | 3.0E-10 | 4  | 8.3  |
| O15230 | Laminin subunit alpha-5                                              | 0.16 | 0.160 | 7.9E-05 | 12 | 4.3  |
| P50895 | Basal cell adhesion molecule                                         | 0.15 | 0.183 | 4.3E-04 | 6  | 13.1 |
| O00468 | Agrin                                                                | 0.15 | 0.040 | 8.8E-05 | 3  | 1.8  |
| Q94875 | Sorbin and SH3 domain-containing protein 2                           | 0.15 | 0.438 | 3.3E-02 | 3  | 4.7  |
| P08294 | Extracellular superoxide dismutase [Cu-Zn]                           | 0.15 | 0.177 | 1.7E-04 | 3  | 15.4 |
| P62736 | Actin, aortic smooth muscle                                          | 0.14 | 0.198 | 4.4E-07 | 6  | 21.0 |
| P11047 | Laminin subunit gamma-1                                              | 0.14 | 0.196 | 6.0E-05 | 11 | 6.5  |
| Q14112 | Nidogen-2                                                            | 0.14 | 0.170 | 4.7E-07 | 9  | 7.4  |
| P80723 | Brain acid soluble protein 1                                         | 0.14 | 0.217 | 1.6E-02 | 3  | 21.1 |
| P08572 | Collagen alpha-2(IV) chain                                           | 0.13 | 0.124 | 8.8E-10 | 5  | 3.5  |
| P51888 | Prolargin                                                            | 0.13 | 0.058 | 0.0E+00 | 13 | 35.6 |
| P35749 | Myosin-11                                                            | 0.13 | 0.133 | 5.4E-14 | 31 | 17.0 |
| P02730 | Band 3 anion transport protein                                       | 0.13 | 0.151 | 2.3E-05 | 7  | 10.3 |
| Q05707 | Collagen alpha-1(XIV) chain                                          | 0.13 | 0.198 | 6.1E-05 | 8  | 4.5  |
| P14543 | Nidogen-1                                                            | 0.13 | 0.125 | 7.1E-05 | 9  | 8.3  |
| P23946 | Chymase                                                              | 0.13 | 0.261 | 8.6E-03 | 3  | 16.6 |
| Q14195 | Dihydropyrimidinase-related protein 3                                | 0.12 | 0.147 | 1.1E-08 | 5  | 11.9 |
| P01031 | Complement C5                                                        | 0.11 | 0.346 | 2.4E-03 | 5  | 2.9  |
| P04083 | Annexin A1                                                           | 0.11 | 0.083 | 1.5E-12 | 10 | 28.3 |
| P02686 | Myelin basic protein                                                 | 0.11 | 0.180 | 1.3E-06 | 3  | 10.5 |
| Q9Y6C2 | EMILIN-1                                                             | 0.11 | 0.141 | 9.2E-07 | 6  | 7.3  |
| P01008 | Antithrombin-III                                                     | 0.11 | 0.345 | 9.5E-03 | 6  | 14.0 |
| P35625 | Metalloproteinase inhibitor 3                                        | 0.11 | 0.115 | 6.1E-12 | 4  | 15.6 |
| P04275 | von Willebrand factor                                                | 0.10 | 0.136 | 6.5E-10 | 7  | 2.9  |
| Q15661 | Tryptase alpha/beta-1                                                | 0.10 | 0.177 | 1.1E-07 | 5  | 20.7 |
| P41219 | Peripherin                                                           | 0.09 | 0.150 | 1.4E-07 | 11 | 24.9 |
| P21810 | Biglycan                                                             | 0.09 | 0.097 | 2.4E-15 | 11 | 31.0 |
| P22352 | Glutathione peroxidase 3                                             | 0.09 | 0.142 | 1.9E-05 | 3  | 11.5 |
| P02743 | Serum amyloid P-component                                            | 0.09 | 0.147 | 8.6E-06 | 6  | 23.3 |
| P07585 | Decorin                                                              | 0.08 | 0.144 | 2.8E-06 | 4  | 9.5  |
| P35555 | Fibrillin-1                                                          | 0.08 | 0.064 | 0.0E+00 | 42 | 14.9 |
| P02748 | Complement component C9                                              | 0.08 | 0.149 | 6.4E-10 | 9  | 15.9 |
| P21980 | Protein-glutamine gamma-glutamyltransferase 2                        | 0.08 | 0.099 | 0.0E+00 | 14 | 19.1 |
| P21926 | CD9 antigen                                                          | 0.07 | 0.228 | 5.9E-05 | 3  | 9.6  |
| P10909 | Clusterin                                                            | 0.07 | 0.083 | 4.3E-13 | 14 | 28.7 |
| P22748 | Carbonic anhydrase 4                                                 | 0.07 | 0.146 | 1.8E-06 | 6  | 17.0 |
| P20774 | Mimecan                                                              | 0.06 | 0.198 | 2.6E-08 | 9  | 31.2 |
| P51884 | Lumican                                                              | 0.06 | 0.071 | 0.0E+00 | 8  | 20.7 |
| P04004 | Vitronectin                                                          | 0.05 | 0.132 | 7.7E-14 | 10 | 19.5 |
| P25189 | Myelin protein P0                                                    | 0.03 | 0.205 | 1.3E-08 | 7  | 27.4 |

Brown denotes change  $\geq 2$  standard deviations (SD) from the mean, yellow denotes change  $\geq 1$  SD and green highlights p values  $\leq 0.05$ . NA, not applicable, n<3 unique peptides.
