# Supplementary material for: iTRAQ Quantitative Proteomic Comparison of Metastatic and Non-Metastatic Uveal Melanoma Tumors
Source: PubMed Central journal article supplement (PMC4549237; doi:10.1371/journal.pone.0135543), 2015-08-25
Supplement: pone.0135543.s009.pdf [file pone.0135543.s009.pdf]

## Supplementary Table S9

## Relative Protein Abundance: Sample UM25, Non-Metastatic

Total Proteins Quantified = 868; LogMedian Protein Ratio = 0.11; LogMean Protein Ratio = 0; Standard Deviation = 0.79

| Uni-Prot Accession | Protein                                                   | Ratio UM/Control | Standard Deviation | p value | Unique Peptides | % Sequence Coverage |
|--------------------|-----------------------------------------------------------|------------------|--------------------|---------|-----------------|---------------------|
| P09211             | Glutathione S-transferase P                               | 8.14             | 0.081              | 1.8E-15 | 9               | 45.7                |
| P30086             | Phosphatidylethanolamine-binding protein 1                | 8.05             | 0.083              | 1.2E-11 | 9               | 52.9                |
| P06454             | Prothymosin alpha                                         | 6.88             | 0.291              | 2.2E-03 | 3               | 21.6                |
| P62937             | Peptidyl-prolyl cis-trans isomerase A                     | 6.71             | 0.060              | 0.0E+00 | 7               | 38.2                |
| Q9UBR2             | Cathepsin Z                                               | 6.39             | 0.152              | 4.7E-06 | 3               | 9.6                 |
| P15121             | Aldose reductase                                          | 5.00             | 0.140              | 2.2E-05 | 5               | 15.8                |
| Q9Y2S2             | Lambda-crystallin homolog                                 | 4.73             | 0.190              | 4.1E-04 | 4               | 13.5                |
| O14556             | Glyceraldehyde-3-phosphate dehydrogenase, testis-specific | 4.72             | 0.189              | 2.9E-04 | 5               | 14.5                |
| P00558             | Phosphoglycerate kinase 1                                 | 4.70             | 0.091              | 5.0E-09 | 9               | 21.6                |
| P63241             | Eukaryotic translation initiation factor 5A-1             | 4.56             | 0.190              | 1.4E-03 | 4               | 27.9                |
| P06733             | Alpha-enolase                                             | 4.53             | 0.051              | 8.7E-15 | 13              | 39.9                |
| P00338             | L-lactate dehydrogenase A chain                           | 4.42             | 0.067              | 5.0E-09 | 8               | 22.0                |
| P31939             | Bifunctional purine biosynthesis protein PURH             | 4.39             | 0.140              | 1.2E-04 | 4               | 8.1                 |
| P78417             | Glutathione S-transferase omega-1                         | 4.24             | 0.094              | 1.1E-09 | 9               | 31.5                |
| P40925             | Malate dehydrogenase, cytoplasmic                         | 4.22             | 0.145              | 9.1E-05 | 6               | 22.2                |
| P02768             | Serum albumin                                             | 4.13             | 0.029              | 0.0E+00 | 38              | 57.0                |
| Q53EL6             | Programmed cell death protein 4                           | 4.10             | 0.125              | 5.8E-05 | 3               | 6.6                 |
| P07195             | L-lactate dehydrogenase B chain                           | 4.06             | 0.080              | 6.1E-09 | 8               | 21.3                |
| Q6XQN6             | Nicotinate phosphoribosyltransferase                      | 3.83             | 0.135              | 1.2E-04 | 3               | 6.1                 |
| Q16658             | Fascin                                                    | 3.83             | 0.092              | 2.0E-04 | 3               | 8.1                 |
| Q04760             | Lactoylglutathione lyase                                  | 3.67             | 0.134              | 1.3E-04 | 4               | 18.5                |
| P60174             | Triosephosphate isomerase                                 | 3.63             | 0.114              | 1.5E-05 | 9               | 35.7                |
| P19338             | Nucleolin                                                 | 3.58             | 0.070              | 6.4E-14 | 14              | 18.3                |
| P52565             | Rho GDP-dissociation inhibitor 1                          | 3.48             | 0.155              | 6.4E-05 | 3               | 22.1                |
| Q9HC38             | Glyoxalase domain-containing protein 4                    | 3.44             | 0.102              | 1.5E-02 | 3               | 10.2                |
| P06737             | Glycogen phosphorylase, liver form                        | 3.39             | 0.080              | 9.1E-11 | 19              | 21.5                |
| P08758             | Annexin A5                                                | 3.39             | 0.051              | 0.0E+00 | 15              | 48.4                |
| P10599             | Thioredoxin                                               | 3.36             | 0.150              | 6.8E-04 | 3               | 32.4                |
| Q13510             | Acid ceramidase                                           | 3.35             | 0.135              | 4.4E-04 | 3               | 7.3                 |
| P29401             | Transketolase                                             | 3.33             | 0.126              | 1.4E-04 | 6               | 9.5                 |
| P15531             | Nucleoside diphosphate kinase A                           | 3.28             | 0.095              | 2.7E-06 | 7               | 52.6                |
| P13797             | Plastin-3                                                 | 3.17             | 0.106              | 1.2E-06 | 6               | 11.9                |
| P30043             | Flavin reductase (NADPH)                                  | 3.17             | 0.244              | 1.1E-02 | 3               | 18.9                |
| P23526             | Adenosylhomocysteinase                                    | 3.13             | 0.196              | 2.8E-03 | 5               | 14.1                |
| P16070             | CD44 antigen                                              | 3.10             | 0.095              | 1.5E-05 | 9               | 12.1                |
| P02787             | Serotransferrin                                           | 3.08             | 0.059              | 1.6E-15 | 18              | 27.9                |
| Q13838             | Spliceosome RNA helicase DDX39B                           | 3.06             | 0.081              | 4.2E-06 | 5               | 12.4                |
| P13489             | Ribonuclease inhibitor                                    | 3.04             | 0.155              | 2.2E-03 | 4               | 9.3                 |
| Q99497             | Protein DJ-1                                              | 2.97             | 0.139              | 4.1E-04 | 6               | 28.0                |
| P22087             | rRNA 2'-O-methyltransferase fibrillarin                   | 2.87             | 0.108              | 3.3E-03 | 7               | 27.4                |
| P01859             | Ig gamma-2 chain C region                                 | 2.85             | 0.067              | 6.2E-04 | 3               | 12.0                |
| P06748             | Nucleophosmin                                             | 2.85             | 0.115              | 1.5E-04 | 6               | 17.0                |
| P57729             | Ras-related protein Rab-38                                | 2.84             | 0.144              | 1.1E-02 | 3               | 12.3                |
| Q95336             | 6-phosphogluconolactonase                                 | 2.82             | 0.139              | 1.5E-02 | 4               | 20.9                |
| P31948             | Stress-induced-phosphoprotein 1                           | 2.76             | 0.100              | 2.1E-08 | 15              | 27.1                |
| P04080             | Cystatin-B                                                | 2.75             | 0.159              | 6.2E-03 | 3               | 39.8                |
| P30837             | Aldehyde dehydrogenase X, mitochondrial                   | 2.75             | 0.112              | 3.9E-06 | 7               | 17.6                |
| P07741             | Adenine phosphoribosyltransferase                         | 2.69             | 0.360              | 2.3E-02 | 3               | 16.7                |
| P40967             | Melanocyte protein PMEL                                   | 2.62             | 0.118              | 1.3E-02 | 3               | 5.9                 |
| P08195             | 4F2 cell-surface antigen heavy chain                      | 2.59             | 0.114              | 5.8E-05 | 8               | 15.4                |
| Q81ZQ5             | Selenoprotein H                                           | 2.59             | 0.187              | 4.7E-02 | 3               | 25.4                |
| P07900             | Heat shock protein HSP 90-alpha                           | 2.57             | 0.066              | 4.3E-07 | 13              | 14.8                |
| P09429             | High mobility group protein B1                            | 2.51             | 0.197              | 2.6E-03 | 6               | 18.6                |
| P06865             | Beta-hexosaminidase subunit alpha                         | 2.49             | 0.132              | 3.7E-02 | 3               | 5.5                 |
| P61604             | 10 kDa heat shock protein, mitochondrial                  | 2.47             | 0.089              | 2.2E-05 | 6               | 51.0                |
| P07737             | Profilin-1                                                | 2.46             | 0.147              | 6.1E-04 | 5               | 34.3                |
| P62750             | 60S ribosomal protein L23a                                | 2.44             | 0.055              | 4.6E-05 | 5               | 27.6                |
| Q01105             | Protein SET                                               | 2.39             | 0.212              | 9.4E-03 | 4               | 16.2                |
| P08238             | Heat shock protein HSP 90-beta                            | 2.39             | 0.067              | 1.5E-07 | 9               | 12.6                |
| P50395             | Rab GDP dissociation inhibitor beta                       | 2.37             | 0.130              | 3.3E-04 | 6               | 16.6                |
| P26641             | Elongation factor 1-gamma                                 | 2.35             | 0.157              | 1.5E-02 | 4               | 8.9                 |
| Q14240             | Eukaryotic initiation factor 4A-II                        | 2.34             | 0.149              | 1.1E-02 | 4               | 12.0                |
| P25398             | 40S ribosomal protein S12                                 | 2.34             | 0.075              | 8.3E-04 | 3               | 22.0                |
| P07910             | Heterogeneous nuclear ribonucleoproteins C1/C2            | 2.33             | 0.080              | 8.6E-12 | 9               | 26.5                |
| Q07955             | Serine/arginine-rich splicing factor 1                    | 2.33             | 0.104              | 3.1E-03 | 5               | 17.3                |
| P16152             | Carbonyl reductase [NADPH] 1                              | 2.31             | 0.153              | 6.6E-04 | 5               | 23.1                |
| Q9Y4W6             | AFG3-like protein 2                                       | 2.29             | 0.157              | 1.2E-02 | 4               | 6.4                 |
| P31153             | S-adenosylmethionine synthase isoform type-2              | 2.28             | 0.037              | 4.6E-03 | 3               | 9.4                 |
| P05387             | 60S acidic ribosomal protein P2                           | 2.27             | 0.089              | 5.0E-05 | 6               | 60.9                |
| P61353             | 60S ribosomal protein L27                                 | 2.27             | 0.154              | 4.4E-03 | 3               | 30.1                |
| P30041             | Peroxisome protein 6                                      | 2.26             | 0.041              | 2.7E-13 | 7               | 25.0                |
| P21283             | V-type proton ATPase subunit C 1                          | 2.25             | 0.120              | 3.5E-03 | 4               | 8.1                 |
| P23528             | Cofilin-1                                                 | 2.25             | 0.074              | 7.7E-03 | 4               | 27.7                |
| P21266             | Glutathione S-transferase Mu 3                            | 2.23             | 0.077              | 6.6E-06 | 4               | 18.7                |
| P51149             | Ras-related protein Rab-7a                                | 2.22             | 0.065              | 5.6E-09 | 7               | 37.2                |
| P07858             | Cathepsin B                                               | 2.22             | 0.108              | 1.7E-03 | 4               | 13.0                |
| O00567             | Nucleolar protein 56                                      | 2.20             | 0.191              | 2.9E-02 | 4               | 6.7                 |
| O00625             | Pirin                                                     | 9.16             | NA                 | NA      | 2               | 6.2                 |
| P62328             | Thymosin beta-4                                           | 5.12             | NA                 | NA      | 2               | 43.2                |
| P24941             | Cyclin-dependent kinase 2                                 | 3.94             | NA                 | NA      | 2               | 8.7                 |
| P63173             | 60S ribosomal protein L38                                 | 3.90             | NA                 | NA      | 2               | 34.3                |
| Q15631             | Translin                                                  | 3.78             | NA                 | NA      | 2               | 11.8                |
| Q81V08             | Phospholipase D3                                          | 3.78             | NA                 | NA      | 2               | 4.3                 |
| P58546             | Myotrophin                                                | 3.69             | NA                 | NA      | 2               | 25.4                |
| Q96C86             | m7GpppX diphosphatase                                     | 3.43             | NA                 | NA      | 2               | 7.1                 |
| Q04446             | 1,4-alpha-glucan-branching enzyme                         | 3.39             | NA                 | NA      | 2               | 4.4                 |
| Q75348             | V-type proton ATPase subunit G 1                          | 2.98             | NA                 | NA      | 2               | 19.5                |
| P07108             | Acyl-CoA-binding protein                                  | 2.89             | NA                 | NA      | 2               | 41.4                |
| P17096             | High mobility group protein HMG-I/HMG-Y                   | 2.78             | NA                 | NA      | 2               | 23.4                |
| Q15843             | NEDD8                                                     | 2.75             | NA                 | NA      | 2               | 17.3                |
| Q15400             | Syntaxin-7                                                | 2.72             | NA                 | NA      | 2               | 8.8                 |
| Q658Y4             | Protein FAM91A1                                           | 2.63             | NA                 | NA      | 2               | 1.9                 |
| O75347             | Tubulin-specific chaperone A                              | 2.59             | 0.420              | 1.6E-01 | 4               | 33.3                |
| Q9UH65             | Switch-associated protein 70                              | 2.59             | 0.269              | 6.7E-02 | 3               | 3.6                 |
| Q13442             | 28 kDa heat- and acid-stable phosphoprotein               | 2.56             | NA                 | NA      | 2               | 13.8                |
| P30044             | Peroxisome protein 5, mitochondrial                       | 2.56             | NA                 | NA      | 2               | 11.7                |
| Q9Y2W1             | Thyroid hormone receptor-associated protein 3             | 2.56             | NA                 | NA      | 2               | 3.4                 |
| P13798             | Acylamino-acid-releasing enzyme                           | 2.46             | NA                 | NA      | 2               | 2.3                 |
| Q9BRA2             | Thioredoxin domain-containing protein 17                  | 2.43             | NA                 | NA      | 2               | 18.7                |
| Q8WWM7             | Ataxin-2-like protein                                     | 2.42             | NA                 | NA      | 2               | 1.8                 |
| Q00796             | Sorbitol dehydrogenase                                    | 2.42             | NA                 | NA      | 2               | 4.8                 |
| P00568             | Adenylate kinase isoenzyme 1                              | 2.32             | NA                 | NA      | 2               | 10.3                |
| P12955             | Xaa-Pro dipeptidase                                       | 2.28             | NA                 | NA      | 2               | 3.7                 |
| Q9Y2X3             | Nucleolar protein 58                                      | 2.28             | 0.326              | 6.9E-02 | 3               | 8.1                 |
| Q03154             | Aminoacylase-1                                            | 2.27             | 0.222              | 1.6E-01 | 3               | 8.6                 |
| P55786             | Puromycin-sensitive aminopeptidase                        | 2.26             | 0.170              | 7.8E-02 | 3               | 3.6                 |
| P13693             | Translationally-controlled tumor protein                  | 2.25             | NA                 | NA      | 2               | 15.7                |
| Q14677             | Clathrin interactor 1                                     | 2.24             | NA                 | NA      | 2               | 3.4                 |

Table S9-Sample UM25

|        |                                                                      |      |       |         |    |      |
|--------|----------------------------------------------------------------------|------|-------|---------|----|------|
| Q99436 | Proteasome subunit beta type-7                                       | 2.22 | NA    | NA      | 2  | 7.2  |
| Q9BUJ2 | Heterogeneous nuclear ribonucleoprotein U-like protein 1             | 2.22 | NA    | NA      | 2  | 2.5  |
| Q9Y3C8 | Ubiquitin-fold modifier-conjugating enzyme 1                         | 2.21 | NA    | NA      | 2  | 11.4 |
| P24534 | Elongation factor 1-beta                                             | 2.19 | 0.085 | 3.7E-03 | 3  | 9.8  |
| P83731 | 60S ribosomal protein L24                                            | 2.19 | 0.065 | 4.1E-04 | 3  | 21.0 |
| P39019 | 40S ribosomal protein S19                                            | 2.18 | 0.156 | 6.6E-03 | 4  | 24.1 |
| P37837 | Transaldolase                                                        | 2.18 | 0.128 | 1.4E-02 | 5  | 13.4 |
| Q08211 | ATP-dependent RNA helicase A                                         | 2.17 | 0.082 | 2.4E-07 | 9  | 8.9  |
| P29966 | Myristoylated alanine-rich C-kinase substrate                        | 2.17 | 0.293 | 6.1E-02 | 6  | 31.6 |
| Q96KP4 | Cytosolic non-specific dipeptidase                                   | 2.16 | 0.079 | 1.9E-04 | 4  | 11.2 |
| P09661 | U2 small nuclear ribonucleoprotein A'                                | 2.16 | 0.174 | 3.8E-02 | 3  | 14.1 |
| Q14247 | Src substrate cortactin                                              | 2.15 | 0.176 | 5.5E-03 | 7  | 16.0 |
| Q9UKV3 | Apoptotic chromatin condensation inducer in the nucleus              | 2.12 | NA    | NA      | 2  | 2.1  |
| O14841 | 5-oxoprolinase                                                       | 2.12 | 0.254 | 9.8E-02 | 4  | 5.1  |
| P13639 | Elongation factor 2                                                  | 2.12 | 0.183 | 5.8E-04 | 9  | 13.4 |
| Q12905 | Interleukin enhancer-binding factor 2                                | 2.12 | 0.094 | 3.1E-04 | 3  | 9.5  |
| P61254 | 60S ribosomal protein L26                                            | 2.10 | NA    | NA      | 2  | 11.7 |
| Q9UQ80 | Proliferation-associated protein 2G4                                 | 2.09 | 0.738 | 3.7E-01 | 3  | 7.6  |
| P61313 | 60S ribosomal protein L15                                            | 2.09 | NA    | NA      | 2  | 12.3 |
| P62263 | 40S ribosomal protein S14                                            | 2.09 | 0.084 | 5.9E-04 | 4  | 37.7 |
| O75083 | WD repeat-containing protein 1                                       | 2.09 | 0.139 | 3.6E-03 | 5  | 9.4  |
| P60842 | Eukaryotic initiation factor 4A-I                                    | 2.09 | 0.138 | 1.8E-03 | 6  | 16.0 |
| P08865 | 40S ribosomal protein SA                                             | 2.09 | 0.068 | 1.4E-04 | 7  | 30.2 |
| P62851 | 40S ribosomal protein S25                                            | 2.08 | 0.053 | 2.7E-05 | 4  | 24.0 |
| P51858 | Hepatoma-derived growth factor                                       | 2.08 | 0.218 | 9.6E-02 | 3  | 14.6 |
| P07339 | Cathepsin D                                                          | 2.07 | 0.074 | 2.2E-05 | 5  | 11.7 |
| P02790 | Hemopexin                                                            | 2.06 | 0.063 | 2.8E-05 | 3  | 6.3  |
| P99999 | Cytochrome c                                                         | 2.06 | 0.125 | 5.7E-03 | 3  | 24.8 |
| P46777 | 60S ribosomal protein L5                                             | 2.06 | 0.142 | 9.4E-04 | 4  | 14.5 |
| P51608 | Methyl-CpG-binding protein 2                                         | 2.06 | 0.170 | 1.1E-01 | 3  | 8.0  |
| Q9Y6C9 | Mitochondrial carrier homolog 2                                      | 2.06 | NA    | NA      | 2  | 7.3  |
| Q15907 | Ras-related protein Rab-11B                                          | 2.05 | 0.123 | 5.1E-02 | 3  | 14.7 |
| Q07020 | 60S ribosomal protein L18                                            | 2.05 | 0.127 | 2.0E-03 | 3  | 18.6 |
| P35613 | Basigin                                                              | 2.05 | 0.321 | 1.4E-01 | 3  | 10.9 |
| Q8UHX1 | Poly(U)-binding-splicing factor PUF60                                | 2.05 | NA    | NA      | 2  | 3.4  |
| Q13185 | Chromobox protein homolog 3                                          | 2.05 | 0.080 | 1.9E-05 | 4  | 26.8 |
| P49773 | Histidine triad nucleotide-binding protein 1                         | 2.05 | 0.192 | 1.5E-01 | 3  | 31.7 |
| P51991 | Heterogeneous nuclear ribonucleoprotein A3                           | 2.03 | 0.047 | 7.2E-08 | 7  | 20.6 |
| P26640 | Valine--tRNA ligase                                                  | 2.03 | NA    | NA      | 2  | 2.4  |
| P27635 | 60S ribosomal protein L10                                            | 2.03 | NA    | NA      | 2  | 9.8  |
| P10768 | S-formylglutathione hydrolase                                        | 1.98 | 0.507 | 1.9E-01 | 4  | 13.1 |
| P11216 | Glycogen phosphorylase, brain form                                   | 1.98 | 0.077 | 6.6E-05 | 8  | 12.6 |
| P63104 | 14-3-3 protein zeta/delta                                            | 1.98 | 0.120 | 1.8E-02 | 4  | 22.9 |
| P29692 | Elongation factor 1-delta                                            | 1.98 | 0.085 | 6.5E-04 | 4  | 15.7 |
| P62906 | 60S ribosomal protein L10a                                           | 1.97 | 0.082 | 4.6E-07 | 6  | 27.6 |
| P17643 | 5,6-dihydroxyindole-2-carboxylic acid oxidase                        | 1.95 | 0.167 | 3.6E-02 | 7  | 15.3 |
| P12081 | Histidine--tRNA ligase, cytoplasmic                                  | 1.94 | NA    | NA      | 2  | 3.5  |
| P26373 | 60S ribosomal protein L13                                            | 1.94 | 0.056 | 1.8E-06 | 3  | 14.2 |
| POCW22 | 40S ribosomal protein S17-like                                       | 1.94 | 0.078 | 2.4E-03 | 3  | 16.3 |
| P62826 | GTP-binding nuclear protein Ran                                      | 1.93 | NA    | NA      | 2  | 13.9 |
| Q9BR76 | Coronin-1B                                                           | 1.93 | NA    | NA      | 2  | 3.7  |
| P06744 | Glucose-6-phosphate isomerase                                        | 1.93 | 0.195 | 3.8E-02 | 4  | 7.0  |
| P60866 | 40S ribosomal protein S20                                            | 1.93 | NA    | NA      | 2  | 19.3 |
| Q8N1G4 | Leucine-rich repeat-containing protein 47                            | 1.92 | NA    | NA      | 2  | 4.3  |
| Q9BZQ8 | Protein Niban                                                        | 1.92 | 0.082 | 3.4E-03 | 4  | 4.3  |
| P46926 | Glucosamine-6-phosphate isomerase 1                                  | 1.92 | 0.081 | 8.5E-03 | 5  | 12.5 |
| P51159 | Ras-related protein Rab-27A                                          | 1.92 | 0.116 | 8.6E-03 | 3  | 15.4 |
| P22314 | Ubiquitin-like modifier-activating enzyme 1                          | 1.91 | 0.171 | 2.9E-03 | 5  | 5.3  |
| Q99536 | Synaptic vesicle membrane protein VAT-1 homolog                      | 1.91 | 0.082 | 1.7E-05 | 12 | 38.7 |
| Q12906 | Interleukin enhancer-binding factor 3                                | 1.89 | 0.123 | 3.4E-03 | 10 | 13.4 |
| P36578 | 60S ribosomal protein L4                                             | 1.89 | 0.083 | 2.9E-05 | 7  | 15.7 |
| Q8WUY3 | Protein prune homolog 2                                              | 1.88 | NA    | NA      | 2  | 0.8  |
| P62424 | 60S ribosomal protein L7a                                            | 1.88 | 0.138 | 8.6E-03 | 5  | 12.4 |
| P12270 | Nucleoprotein TPR                                                    | 1.87 | 0.077 | 2.8E-03 | 8  | 4.9  |
| P16401 | Histone H1.5                                                         | 1.87 | 0.150 | 7.3E-02 | 4  | 15.0 |
| Q86UE4 | Protein LYRIC                                                        | 1.87 | NA    | NA      | 2  | 3.8  |
| P18621 | 60S ribosomal protein L17                                            | 1.86 | NA    | NA      | 2  | 10.9 |
| O75380 | NADH dehydrogenase [ubiquinone] iron-sulfur protein 6, mitochondrial | 1.85 | NA    | NA      | 2  | 20.2 |
| P01857 | Ig gamma-1 chain C region                                            | 1.85 | 0.059 | 1.3E-06 | 4  | 18.5 |
| P54819 | Adenylate kinase 2, mitochondrial                                    | 1.84 | 0.113 | 2.3E-02 | 3  | 15.5 |
| P40926 | Malate dehydrogenase, mitochondrial                                  | 1.83 | 0.055 | 1.3E-07 | 11 | 34.9 |
| P62158 | Calmodulin                                                           | 1.83 | 0.151 | 2.4E-02 | 5  | 32.2 |
| P62829 | 60S ribosomal protein L23                                            | 1.83 | 0.035 | 4.5E-03 | 3  | 23.6 |
| P04406 | Glyceraldehyde-3-phosphate dehydrogenase                             | 1.83 | 0.062 | 1.4E-06 | 8  | 23.6 |
| Q02878 | 60S ribosomal protein L6                                             | 1.82 | 0.121 | 2.6E-03 | 10 | 30.2 |
| P25786 | Proteasome subunit alpha type-1                                      | 1.82 | 0.072 | 2.7E-04 | 5  | 16.0 |
| P14868 | Aspartate--tRNA ligase, cytoplasmic                                  | 1.82 | 0.110 | 1.9E-04 | 5  | 13.4 |
| Q92597 | Protein NDRG1                                                        | 1.80 | NA    | NA      | 2  | 5.6  |
| Q16836 | Hydroxyacyl-coenzyme A dehydrogenase, mitochondrial                  | 1.80 | 0.066 | 1.6E-03 | 3  | 10.2 |
| P62280 | 40S ribosomal protein S11                                            | 1.79 | 0.077 | 2.6E-03 | 6  | 27.8 |
| Q1KMD3 | Heterogeneous nuclear ribonucleoprotein U-like protein 2             | 1.78 | 0.048 | 3.4E-04 | 4  | 4.3  |
| P04792 | Heat shock protein beta-1                                            | 1.77 | 0.043 | 5.2E-08 | 6  | 31.2 |
| P46783 | 40S ribosomal protein S10                                            | 1.77 | NA    | NA      | 2  | 14.5 |
| P62258 | 14-3-3 protein epsilon                                               | 1.77 | 0.088 | 2.9E-03 | 8  | 32.2 |
| Q00839 | Heterogeneous nuclear ribonucleoprotein U                            | 1.77 | 0.060 | 1.6E-05 | 11 | 13.0 |
| P02765 | Alpha-2-HS-glycoprotein                                              | 1.77 | 0.236 | 7.2E-02 | 4  | 9.3  |
| Q9H307 | Pinin                                                                | 1.75 | NA    | NA      | 2  | 3.9  |
| P20618 | Proteasome subunit beta type-1                                       | 1.75 | NA    | NA      | 2  | 9.5  |
| O14979 | Heterogeneous nuclear ribonucleoprotein D-like                       | 1.75 | 0.078 | 2.6E-03 | 3  | 4.5  |
| P61247 | 40S ribosomal protein S3a                                            | 1.74 | 0.203 | 8.5E-02 | 5  | 20.5 |
| P27348 | 14-3-3 protein theta                                                 | 1.74 | NA    | NA      | 2  | 10.2 |
| P54652 | Heat shock-related 70 kDa protein 2                                  | 1.73 | 0.110 | 6.4E-02 | 7  | 13.1 |
| P28161 | Glutathione S-transferase Mu 2                                       | 1.73 | NA    | NA      | 2  | 6.9  |
| Q9NY12 | H/ACA ribonucleoprotein complex subunit 1                            | 1.73 | NA    | NA      | 2  | 7.4  |
| Q14103 | Heterogeneous nuclear ribonucleoprotein D0                           | 1.72 | NA    | NA      | 2  | 6.8  |
| P18669 | Phosphoglycerate mutase 1                                            | 1.72 | NA    | NA      | 2  | 15.4 |
| Q12913 | Receptor-type tyrosine-protein phosphatase eta                       | 1.71 | 0.082 | 6.7E-03 | 4  | 4.0  |
| P62913 | 60S ribosomal protein L11                                            | 1.71 | 0.056 | 4.7E-04 | 3  | 16.9 |
| P07954 | Fumarate hydratase, mitochondrial                                    | 1.71 | NA    | NA      | 2  | 3.1  |
| Q9NSD9 | Phenylalanine--tRNA ligase beta subunit                              | 1.71 | 0.069 | 1.3E-03 | 3  | 4.9  |
| P23246 | Splicing factor, proline- and glutamine-rich                         | 1.70 | 0.251 | 5.0E-02 | 5  | 7.4  |
| Q15181 | Inorganic pyrophosphatase                                            | 1.70 | 0.200 | 4.1E-02 | 3  | 10.4 |
| Q96BM9 | ADP-ribosylation factor-like protein 8A                              | 1.69 | NA    | NA      | 2  | 10.8 |
| Q16629 | Serine/arginine-rich splicing factor 7                               | 1.68 | NA    | NA      | 2  | 7.6  |
| P39687 | Acidic leucine-rich nuclear phosphoprotein 32 family member A        | 1.67 | 0.102 | 4.7E-03 | 3  | 12.9 |
| O43809 | Cleavage and polyadenylation specificity factor subunit 5            | 1.67 | NA    | NA      | 2  | 9.7  |
| P62899 | 60S ribosomal protein L31                                            | 1.67 | NA    | NA      | 2  | 13.6 |
| Q8IWB7 | WD repeat and FYVE domain-containing protein 1                       | 1.66 | 0.159 | 8.5E-02 | 3  | 10.0 |
| P20042 | Eukaryotic translation initiation factor 2 subunit 2                 | 1.65 | NA    | NA      | 2  | 9.9  |
| P09417 | Dihydropteridine reductase                                           | 1.65 | NA    | NA      | 2  | 12.3 |
| P38606 | V-type proton ATPase catalytic subunit A                             | 1.64 | 0.166 | 2.9E-02 | 4  | 8.4  |
| P01834 | Ig kappa chain C region                                              | 1.64 | 0.084 | 9.7E-03 | 3  | 48.1 |
| P50914 | 60S ribosomal protein L14                                            | 1.64 | NA    | NA      | 2  | 10.7 |
| Q15233 | Non-POU domain-containing octamer-binding protein                    | 1.64 | 0.217 | 6.5E-02 | 5  | 15.5 |
| B5ME19 | Eukaryotic translation initiation factor 3 subunit C-like protein    | 1.64 | 0.118 | 6.6E-03 | 7  | 6.6  |

Table S9-Sample UM25

|        |                                                                             |      |       |         |    |      |
|--------|-----------------------------------------------------------------------------|------|-------|---------|----|------|
| P62241 | 40S ribosomal protein S8                                                    | 1.63 | 0.155 | 1.8E-02 | 4  | 15.4 |
| P46778 | 60S ribosomal protein L21                                                   | 1.63 | NA    | NA      | 2  | 16.9 |
| P50502 | Hsc70-interacting protein                                                   | 1.63 | 0.140 | 1.4E-01 | 3  | 9.2  |
| P02647 | Apolipoprotein A-I                                                          | 1.63 | 0.054 | 5.0E-05 | 8  | 26.2 |
| P23396 | 40S ribosomal protein S3                                                    | 1.62 | 0.055 | 7.7E-07 | 9  | 33.3 |
| P01625 | Ig kappa chain V-IV region Len                                              | 1.62 | 0.422 | 2.3E-01 | 3  | 28.9 |
| P62249 | 40S ribosomal protein S16                                                   | 1.62 | 0.113 | 1.5E-03 | 5  | 33.6 |
| P32969 | 60S ribosomal protein L9                                                    | 1.61 | 0.118 | 8.7E-03 | 3  | 11.5 |
| P14618 | Pyruvate kinase PKM                                                         | 1.61 | 0.059 | 3.4E-08 | 10 | 23.0 |
| P62277 | 40S ribosomal protein S13                                                   | 1.61 | 0.100 | 2.9E-03 | 6  | 32.5 |
| P78347 | General transcription factor II-I                                           | 1.59 | 0.271 | 6.5E-02 | 6  | 5.0  |
| P63279 | SUMO-conjugating enzyme UBC9                                                | 1.59 | NA    | NA      | 2  | 16.5 |
| Q96GK7 | Fumarylacetoacetate hydrolase domain-containing protein 2A                  | 1.58 | 0.233 | 1.2E-01 | 3  | 14.3 |
| Q86UX7 | Fermitin family homolog 3                                                   | 1.57 | NA    | NA      | 2  | 3.9  |
| P10809 | 60 kDa heat shock protein, mitochondrial                                    | 1.57 | 0.104 | 6.0E-03 | 13 | 24.8 |
| O95758 | Polypyrimidine tract-binding protein 3                                      | 1.57 | 0.101 | 1.5E-02 | 3  | 3.4  |
| P52597 | Heterogeneous nuclear ribonucleoprotein F                                   | 1.57 | 0.053 | 1.3E-01 | 3  | 7.0  |
| P62701 | 40S ribosomal protein S4, X isoform                                         | 1.56 | 0.130 | 8.3E-03 | 6  | 17.5 |
| P11142 | Heat shock cognate 71 kDa protein                                           | 1.56 | 0.073 | 8.5E-05 | 11 | 19.3 |
| P15880 | 40S ribosomal protein S2                                                    | 1.56 | 0.095 | 6.4E-04 | 5  | 21.5 |
| Q96AG4 | Leucine-rich repeat-containing protein 59                                   | 1.55 | NA    | NA      | 2  | 6.2  |
| Q5VTE0 | Putative elongation factor 1-alpha-like 3                                   | 1.55 | 0.072 | 3.7E-04 | 11 | 26.6 |
| P62995 | Transformer-2 protein homolog beta                                          | 1.55 | NA    | NA      | 2  | 5.9  |
| P49753 | Acyl-coenzyme A thioesterase 2, mitochondrial                               | 1.55 | NA    | NA      | 2  | 3.9  |
| Q02543 | 60S ribosomal protein L18a                                                  | 1.55 | NA    | NA      | 2  | 12.5 |
| P22626 | Heterogeneous nuclear ribonucleoproteins A2/B1                              | 1.55 | 0.069 | 7.0E-07 | 12 | 28.3 |
| P62917 | 60S ribosomal protein L8                                                    | 1.54 | NA    | NA      | 2  | 10.5 |
| P34932 | Heat shock 70 kDa protein 4                                                 | 1.54 | 0.087 | 1.6E-02 | 6  | 7.5  |
| P54727 | UV excision repair protein RAD23 homolog B                                  | 1.53 | 0.268 | 1.4E-01 | 4  | 8.6  |
| P22061 | Protein-L-isospartate(D-aspartate) O-methyltransferase                      | 1.53 | NA    | NA      | 2  | 13.2 |
| P62269 | 40S ribosomal protein S18                                                   | 1.53 | 0.059 | 3.8E-03 | 7  | 36.8 |
| O15145 | Actin-related protein 2/3 complex subunit 3                                 | 1.53 | 0.095 | 2.4E-03 | 3  | 15.7 |
| P0C0S8 | Histone H2A type 1                                                          | 1.52 | NA    | NA      | 2  | 23.1 |
| P62753 | 40S ribosomal protein S6                                                    | 1.52 | 0.115 | 1.6E-02 | 5  | 19.3 |
| P18124 | 60S ribosomal protein L7                                                    | 1.52 | 0.040 | 5.7E-06 | 6  | 23.8 |
| P17858 | ATP-dependent 6-phosphofructokinase, liver type                             | 1.52 | 0.286 | 1.1E-01 | 4  | 7.3  |
| Q00059 | Transcription factor A, mitochondrial                                       | 1.52 | 0.097 | 1.3E-01 | 3  | 13.8 |
| Q15008 | 26S proteasome non-ATPase regulatory subunit 6                              | 1.51 | 0.140 | 1.4E-01 | 3  | 9.0  |
| O94826 | Mitochondrial import receptor subunit TOM70                                 | 1.51 | 0.038 | 7.7E-05 | 6  | 12.3 |
| Q9H2U2 | Inorganic pyrophosphatase 2, mitochondrial                                  | 1.51 | 0.161 | 8.8E-02 | 3  | 9.9  |
| P35998 | 26S protease regulatory subunit 7                                           | 1.51 | 0.129 | 5.6E-02 | 3  | 10.2 |
| P57053 | Histone H2B type F-S                                                        | 1.51 | NA    | NA      | 2  | 7.9  |
| O14773 | Tripeptidyl-peptidase 1                                                     | 1.51 | NA    | NA      | 2  | 5.0  |
| P51817 | cAMP-dependent protein kinase catalytic subunit PRKX                        | 1.50 | NA    | NA      | 2  | 3.6  |
| E9PAV3 | Nascent polypeptide-associated complex subunit alpha, muscle-specific form  | 1.50 | NA    | NA      | 2  | 1.3  |
| P07602 | Prosaposin                                                                  | 1.50 | 0.074 | 1.7E-03 | 5  | 7.1  |
| Q92841 | Probable ATP-dependent RNA helicase DDX17                                   | 1.50 | 0.079 | 6.7E-03 | 5  | 8.5  |
| Q9Y6M9 | NADH dehydrogenase [ubiquinone] 1 beta subcomplex subunit 9                 | 1.50 | NA    | NA      | 2  | 15.6 |
| O00483 | NADH dehydrogenase [ubiquinone] 1 alpha subcomplex subunit 4                | 1.50 | NA    | NA      | 2  | 22.2 |
| Q92945 | Far upstream element-binding protein 2                                      | 1.50 | 0.119 | 1.6E-02 | 6  | 9.4  |
| P10644 | cAMP-dependent protein kinase type I-alpha regulatory subunit               | 1.49 | 0.204 | 1.8E-01 | 3  | 10.0 |
| Q9GZT3 | SRA stem-loop-interacting RNA-binding protein, mitochondrial                | 1.49 | NA    | NA      | 2  | 23.9 |
| P40429 | 60S ribosomal protein L13a                                                  | 1.49 | 0.103 | 6.3E-03 | 5  | 23.6 |
| P31943 | Heterogeneous nuclear ribonucleoprotein H                                   | 1.49 | NA    | NA      | 2  | 4.9  |
| O60506 | Heterogeneous nuclear ribonucleoprotein Q                                   | 1.48 | 0.161 | 8.2E-02 | 4  | 7.9  |
| P11586 | C-1-tetrahydrofolate synthase, cytoplasmic                                  | 1.48 | 0.100 | 4.4E-03 | 4  | 5.2  |
| P05388 | 60S acidic ribosomal protein P0                                             | 1.48 | NA    | NA      | 2  | 6.6  |
| Q12904 | Aminoacyl tRNA synthase complex-interacting multifunctional protein 1       | 1.47 | NA    | NA      | 2  | 9.6  |
| P46782 | 40S ribosomal protein S5                                                    | 1.47 | 0.073 | 1.6E-02 | 3  | 8.8  |
| P30050 | 60S ribosomal protein L12                                                   | 1.47 | 0.286 | 3.0E-01 | 3  | 26.1 |
| P36543 | V-type proton ATPase subunit E 1                                            | 1.47 | NA    | NA      | 2  | 7.5  |
| Q07666 | KH domain-containing, RNA-binding, signal transduction-associated protein 1 | 1.47 | 0.037 | 7.5E-06 | 5  | 9.3  |
| Q12874 | Splicing factor 3A subunit 3                                                | 1.46 | NA    | NA      | 2  | 4.0  |
| P09651 | Heterogeneous nuclear ribonucleoprotein A1                                  | 1.46 | 0.073 | 8.3E-06 | 7  | 21.0 |
| P61978 | Heterogeneous nuclear ribonucleoprotein K                                   | 1.45 | 0.064 | 1.5E-04 | 14 | 32.6 |
| O75533 | Splicing factor 3B subunit 1                                                | 1.45 | NA    | NA      | 2  | 2.4  |
| P69905 | Hemoglobin subunit alpha                                                    | 1.45 | 0.059 | 3.9E-06 | 7  | 50.7 |
| O00560 | Syntenin-1                                                                  | 1.44 | 0.484 | 2.9E-01 | 3  | 9.1  |
| P42704 | Leucine-rich PPR motif-containing protein, mitochondrial                    | 1.44 | 0.082 | 1.3E-03 | 8  | 6.0  |
| P38646 | Stress-70 protein, mitochondrial                                            | 1.43 | 0.187 | 1.2E-02 | 11 | 18.3 |
| Q9NP81 | Serine-tRNA ligase, mitochondrial                                           | 1.43 | NA    | NA      | 2  | 6.9  |
| P62857 | 40S ribosomal protein S28                                                   | 1.43 | NA    | NA      | 2  | 30.4 |
| Q16531 | DNA damage-binding protein 1                                                | 1.43 | NA    | NA      | 2  | 1.4  |
| P61421 | V-type proton ATPase subunit d 1                                            | 1.43 | 0.020 | 5.0E-05 | 3  | 7.7  |
| Q9NTK5 | Obg-like ATPase 1                                                           | 1.42 | NA    | NA      | 2  | 7.1  |
| Q06323 | Proteasome activator complex subunit 1                                      | 1.42 | 0.267 | 1.8E-01 | 4  | 18.5 |
| P27816 | Microtubule-associated protein 4                                            | 1.41 | 1.032 | 3.7E-01 | 6  | 8.0  |
| P05155 | Plasma protease C1 inhibitor                                                | 1.41 | NA    | NA      | 2  | 4.6  |
| Q86VP6 | Cullin-associated NEDD8-dissociated protein 1                               | 1.41 | 0.065 | 6.2E-03 | 8  | 6.8  |
| P00441 | Superoxide dismutase [Cu-Zn]                                                | 1.41 | NA    | NA      | 2  | 13.0 |
| Q14152 | Eukaryotic translation initiation factor 3 subunit A                        | 1.40 | 0.099 | 3.7E-02 | 3  | 2.7  |
| P09012 | U1 small nuclear ribonucleoprotein A                                        | 1.40 | NA    | NA      | 2  | 9.2  |
| Q81Y95 | Transmembrane protein 192                                                   | 1.39 | NA    | NA      | 2  | 8.5  |
| P14866 | Heterogeneous nuclear ribonucleoprotein L                                   | 1.39 | 0.194 | 1.7E-01 | 6  | 11.7 |
| Q8IAA8 | Ragulator complex protein LAMTOR1                                           | 1.39 | 0.193 | 2.0E-01 | 3  | 17.4 |
| P21281 | V-type proton ATPase subunit B, brain isoform                               | 1.38 | 0.345 | 1.6E-01 | 4  | 9.6  |
| P00751 | Complement factor B                                                         | 1.38 | 0.092 | 7.4E-02 | 3  | 3.7  |
| P53597 | Succinyl-CoA ligase [ADP/GDP-forming] subunit alpha, mitochondrial          | 1.37 | 0.130 | 8.4E-02 | 3  | 9.8  |
| Q9Y411 | Unconventional myosin-Va                                                    | 1.37 | 0.096 | 2.0E-02 | 6  | 3.3  |
| P46940 | Ras GTPase-activating-like protein IQGAP1                                   | 1.37 | 0.167 | 2.4E-02 | 14 | 9.7  |
| P48047 | ATP synthase subunit O, mitochondrial                                       | 1.37 | 0.172 | 1.2E-02 | 4  | 25.4 |
| P59998 | Actin-related protein 2/3 complex subunit 4                                 | 1.37 | 0.040 | 5.4E-03 | 3  | 16.1 |
| P78371 | T-complex protein 1 subunit beta                                            | 1.37 | 0.139 | 2.1E-02 | 7  | 14.0 |
| Q08380 | Galectin-3-binding protein                                                  | 1.37 | NA    | NA      | 2  | 4.3  |
| O43390 | Heterogeneous nuclear ribonucleoprotein R                                   | 1.36 | 0.123 | 1.8E-02 | 6  | 8.7  |
| Q6UXV4 | Apolipoprotein O-like                                                       | 1.36 | NA    | NA      | 2  | 11.6 |
| Q15149 | Plectin                                                                     | 1.35 | 0.029 | 0.0E+00 | 90 | 20.1 |
| P50453 | Serpine B9                                                                  | 1.35 | 0.148 | 1.8E-01 | 4  | 14.4 |
| P61158 | Actin-related protein 3                                                     | 1.35 | 0.092 | 6.5E-03 | 7  | 20.6 |
| P84103 | Serine/arginine-rich splicing factor 3                                      | 1.35 | 0.233 | 1.9E-01 | 3  | 20.7 |
| P61981 | 14-3-3 protein gamma                                                        | 1.34 | NA    | NA      | 2  | 9.7  |
| P31040 | Succinate dehydrogenase [ubiquinone] flavoprotein subunit, mitochondrial    | 1.34 | 0.138 | 1.1E-01 | 6  | 11.9 |
| P08670 | Vimentin                                                                    | 1.33 | 0.067 | 1.2E-04 | 27 | 56.4 |
| P02774 | Vitamin D-binding protein                                                   | 1.33 | 0.056 | 4.0E-02 | 3  | 4.9  |
| P62136 | Serine/threonine-protein phosphatase PP1-alpha catalytic subunit            | 1.33 | 0.101 | 2.5E-02 | 4  | 15.2 |
| Q06830 | Peroxiredoxin-1                                                             | 1.33 | 0.091 | 1.2E-03 | 9  | 37.7 |
| Q9UKM9 | RNA-binding protein Raly                                                    | 1.33 | 0.095 | 1.5E-01 | 3  | 13.7 |
| Q08945 | FACT complex subunit SSRP1                                                  | 1.32 | NA    | NA      | 2  | 2.0  |
| Q15365 | Poly(rC)-binding protein 1                                                  | 1.32 | 0.072 | 2.8E-02 | 3  | 10.7 |
| Q14974 | Importin subunit beta-1                                                     | 1.32 | 0.352 | 1.6E-01 | 5  | 7.8  |
| P09874 | Poly [ADP-ribose] polymerase 1                                              | 1.32 | 0.145 | 1.0E-01 | 8  | 11.5 |
| P38117 | Electron transfer flavoprotein subunit beta                                 | 1.31 | 0.044 | 9.5E-04 | 5  | 17.3 |
| P63244 | Guanine nucleotide-binding protein subunit beta-2-like 1                    | 1.31 | NA    | NA      | 2  | 8.8  |
| Q02652 | Apolipoprotein A-II                                                         | 1.31 | 0.295 | 4.0E-01 | 3  | 19.0 |
| Q02252 | Methylmalonate-semialdehyde dehydrogenase [acylating], mitochondrial        | 1.31 | NA    | NA      | 2  | 3.9  |

Table S9-Sample UM25

|         |                                                                                   |      |       |         |    |      |
|---------|-----------------------------------------------------------------------------------|------|-------|---------|----|------|
| O75367  | Core histone macro-H2A.1                                                          | 1.31 | 0.146 | 7.1E-02 | 7  | 24.2 |
| Q14683  | Structural maintenance of chromosomes protein 1A                                  | 1.31 | 0.277 | 1.0E-01 | 3  | 2.8  |
| P21912  | Succinate dehydrogenase [ubiquinone] iron-sulfur subunit, mitochondrial           | 1.30 | 0.102 | 2.4E-02 | 4  | 13.9 |
| Q9NYF8  | Bcl-2-associated transcription factor 1                                           | 1.30 | NA    | NA      | 2  | 4.2  |
| P02042  | Hemoglobin subunit delta                                                          | 1.30 | NA    | NA      | 2  | 17.7 |
| Q9Y696  | Chloride intracellular channel protein 4                                          | 1.30 | NA    | NA      | 2  | 7.1  |
| P09525  | Annexin A4                                                                        | 1.30 | 0.293 | 6.0E-02 | 6  | 16.6 |
| Q13435  | Splicing factor 3B subunit 2                                                      | 1.29 | 0.115 | 1.3E-01 | 6  | 7.3  |
| Q9Y5M8  | Signal recognition particle receptor subunit beta                                 | 1.29 | NA    | NA      | 2  | 7.7  |
| A4D1P6  | WD repeat-containing protein 91                                                   | 1.29 | NA    | NA      | 2  | 2.8  |
| O75874  | Isocitrate dehydrogenase [NADP] cytoplasmic                                       | 1.29 | NA    | NA      | 2  | 5.8  |
| P00505  | Aspartate aminotransferase, mitochondrial                                         | 1.28 | 0.060 | 8.6E-03 | 7  | 18.8 |
| A1L0T0  | Acetolactate synthase-like protein                                                | 1.28 | NA    | NA      | 2  | 4.7  |
| P09669  | Cytochrome c oxidase subunit 6C                                                   | 1.28 | 0.098 | 3.3E-02 | 4  | 48.0 |
| O43399  | Tumor protein D54                                                                 | 1.28 | 0.083 | 1.6E-01 | 3  | 9.7  |
| P12956  | X-ray repair cross-complementing protein 6                                        | 1.28 | 0.096 | 6.2E-03 | 10 | 17.6 |
| Q9Y262  | Eukaryotic translation initiation factor 3 subunit L                              | 1.28 | 0.136 | 3.0E-01 | 3  | 4.8  |
| Q14980  | Nuclear mitotic apparatus protein 1                                               | 1.28 | 0.221 | 7.6E-02 | 12 | 7.7  |
| P46781  | 40S ribosomal protein S9                                                          | 1.27 | 0.127 | 4.4E-02 | 7  | 26.3 |
| P11177  | Pyruvate dehydrogenase E1 component subunit beta, mitochondrial                   | 1.27 | 0.026 | 5.5E-04 | 5  | 16.2 |
| Q15717  | ELAV-like protein 1                                                               | 1.27 | 0.860 | 6.7E-01 | 3  | 15.0 |
| O75643  | U5 small nuclear ribonucleoprotein 200 kDa helicase                               | 1.27 | 0.072 | 5.1E-02 | 5  | 2.6  |
| P62244  | 40S ribosomal protein S15a                                                        | 1.27 | 0.195 | 1.8E-01 | 4  | 29.2 |
| P51665  | 26S proteasome non-ATPase regulatory subunit 7                                    | 1.27 | NA    | NA      | 2  | 5.9  |
| Q969P0  | Immunoglobulin superfamily member 8                                               | 1.27 | NA    | NA      | 2  | 5.7  |
| Q99798  | Aconitate hydratase, mitochondrial                                                | 1.27 | 0.175 | 2.1E-01 | 6  | 9.9  |
| P13010  | X-ray repair cross-complementing protein 5                                        | 1.27 | 0.100 | 2.9E-02 | 5  | 7.7  |
| P49591  | Serine-tRNA ligase, cytoplasmic                                                   | 1.27 | NA    | NA      | 2  | 5.3  |
| O15144  | Actin-related protein 2/3 complex subunit 2                                       | 1.27 | 0.023 | 7.6E-04 | 4  | 12.0 |
| P61160  | Actin-related protein 2                                                           | 1.26 | 0.102 | 2.1E-02 | 5  | 18.0 |
| Q13151  | Heterogeneous nuclear ribonucleoprotein A0                                        | 1.26 | 0.195 | 1.0E-01 | 3  | 7.5  |
| P08559  | Pyruvate dehydrogenase E1 component subunit alpha, somatic form, mitochondrial    | 1.26 | NA    | NA      | 2  | 5.4  |
| Q9NX63  | Coiled-coil-helix-coiled-coil-helix domain-containing protein 3, mitochondrial    | 1.25 | NA    | NA      | 2  | 6.6  |
| P39023  | 60S ribosomal protein L3                                                          | 1.25 | 0.057 | 2.7E-02 | 3  | 8.7  |
| P51810  | G-protein coupled receptor 143                                                    | 1.25 | 0.293 | 2.0E-01 | 3  | 9.9  |
| P04075  | Fructose-bisphosphate aldolase A                                                  | 1.25 | 0.063 | 2.5E-02 | 14 | 45.1 |
| P61204  | ADP-ribosylation factor 3                                                         | 1.25 | NA    | NA      | 2  | 11.6 |
| Q9UJ7   | GTP-AMP phosphotransferase AK3, mitochondrial                                     | 1.25 | 0.057 | 5.4E-02 | 5  | 25.1 |
| P20645  | Cation-dependent mannose-6-phosphate receptor                                     | 1.24 | NA    | NA      | 2  | 10.5 |
| Q9NV17  | ATPase family AAA domain-containing protein 3A                                    | 1.24 | NA    | NA      | 2  | 3.8  |
| O14617  | AP-3 complex subunit delta-1                                                      | 1.24 | NA    | NA      | 2  | 2.3  |
| Q9ULA0  | Aspartyl aminopeptidase                                                           | 1.24 | NA    | NA      | 2  | 5.7  |
| P54709  | Sodium/potassium-transporting ATPase subunit beta-3                               | 1.24 | 0.015 | 3.7E-02 | 5  | 22.6 |
| P47985  | Cytochrome b-c1 complex subunit Rieske, mitochondrial                             | 1.23 | 0.739 | 3.7E-01 | 3  | 11.3 |
| Q14738  | Serine/threonine-protein phosphatase 2A 56 kDa regulatory subunit delta isoform   | 1.23 | NA    | NA      | 2  | 4.0  |
| P50402  | Emerin                                                                            | 1.23 | NA    | NA      | 2  | 9.8  |
| O95881  | Thioredoxin domain-containing protein 12                                          | 1.23 | NA    | NA      | 2  | 14.0 |
| P10412  | Histone H1.4                                                                      | 1.23 | 0.203 | 1.5E-01 | 6  | 15.5 |
| O14818  | Proteasome subunit alpha type-7                                                   | 1.22 | NA    | NA      | 2  | 6.9  |
| P26885  | Peptidyl-prolyl cis-trans isomerase FKBP2                                         | 1.22 | NA    | NA      | 2  | 9.2  |
| P01876  | Ig alpha-1 chain C region                                                         | 1.22 | NA    | NA      | 2  | 5.9  |
| Q9UHQ9  | NADH-cytochrome b5 reductase 1                                                    | 1.21 | 0.128 | 6.0E-02 | 4  | 15.1 |
| O75390  | Citrate synthase, mitochondrial                                                   | 1.21 | 0.082 | 1.4E-01 | 5  | 10.3 |
| P12830  | Cadherin-1                                                                        | 1.21 | 0.204 | 4.0E-01 | 3  | 4.4  |
| Q93050  | V-type proton ATPase 116 kDa subunit a isoform 1                                  | 1.21 | 0.090 | 2.0E-01 | 4  | 7.0  |
| O15143  | Actin-related protein 2/3 complex subunit 1B                                      | 1.21 | 0.113 | 2.1E-01 | 4  | 14.8 |
| Q08257  | Quinone oxidoreductase                                                            | 1.21 | NA    | NA      | 2  | 8.5  |
| P43686  | 26S protease regulatory subunit 6B                                                | 1.20 | 0.141 | 2.0E-01 | 3  | 8.1  |
| P30153  | Serine/threonine-protein phosphatase 2A 65 kDa regulatory subunit A alpha isoform | 1.20 | 0.047 | 7.5E-02 | 3  | 6.5  |
| O75489  | NADH dehydrogenase [ubiquinone] iron-sulfur protein 3, mitochondrial              | 1.20 | 0.124 | 8.5E-02 | 5  | 19.3 |
| P68871  | Hemoglobin subunit beta                                                           | 1.20 | 0.199 | 4.2E-02 | 5  | 44.9 |
| P52272  | Heterogeneous nuclear ribonucleoprotein M                                         | 1.20 | 0.125 | 8.6E-02 | 7  | 12.1 |
| P21796  | Voltage-dependent anion-selective channel protein 1                               | 1.20 | 0.082 | 2.9E-02 | 7  | 26.9 |
| Q6P148  | Aspartate-tRNA ligase, mitochondrial                                              | 1.19 | NA    | NA      | 2  | 2.2  |
| O15511  | Actin-related protein 2/3 complex subunit 5                                       | 1.19 | 0.203 | 5.4E-01 | 3  | 21.9 |
| P04632  | Calpain small subunit 1                                                           | 1.19 | 0.443 | 2.2E-01 | 4  | 13.8 |
| O60716  | Catenin delta-1                                                                   | 1.19 | 0.192 | 1.4E-01 | 3  | 3.3  |
| Q9NSE4  | Isoleucine-tRNA ligase, mitochondrial                                             | 1.19 | 0.082 | 7.7E-02 | 4  | 4.6  |
| Q8N0X7  | Spartin                                                                           | 1.19 | NA    | NA      | 2  | 3.2  |
| P37108  | Signal recognition particle 14 kDa protein                                        | 1.18 | NA    | NA      | 2  | 13.2 |
| P48643  | T-complex protein 1 subunit epsilon                                               | 1.18 | 0.111 | 2.0E-02 | 10 | 17.0 |
| P50213  | Isocitrate dehydrogenase [NAD] subunit alpha, mitochondrial                       | 1.17 | 0.077 | 8.2E-02 | 3  | 10.1 |
| Q16851  | UTP--glucose-1-phosphate uridylyltransferase                                      | 1.17 | 0.226 | 2.5E-01 | 3  | 6.9  |
| P60228  | Eukaryotic translation initiation factor 3 subunit E                              | 1.17 | NA    | NA      | 2  | 3.8  |
| Q14165  | Malectin                                                                          | 1.17 | NA    | NA      | 2  | 5.5  |
| Q16698  | 2,4-dienoyl-CoA reductase, mitochondrial                                          | 1.17 | 1.050 | 6.3E-01 | 4  | 15.2 |
| Q9Y3U8  | 60S ribosomal protein L36                                                         | 1.17 | 0.093 | 1.5E-01 | 4  | 30.5 |
| Q14697  | Neutral alpha-glucosidase AB                                                      | 1.17 | 3.850 | 2.6E-01 | 11 | 12.0 |
| P20700  | Lamin-B1                                                                          | 1.16 | 0.254 | 3.7E-01 | 9  | 18.1 |
| O00231  | 26S proteasome non-ATPase regulatory subunit 11                                   | 1.16 | 0.115 | 2.3E-01 | 3  | 5.7  |
| P22695  | Cytochrome b-c1 complex subunit 2, mitochondrial                                  | 1.16 | 0.243 | 2.5E-01 | 4  | 12.1 |
| P49411  | Elongation factor Tu, mitochondrial                                               | 1.16 | 0.026 | 3.6E-04 | 8  | 19.2 |
| P49327  | Fatty acid synthase                                                               | 1.15 | NA    | NA      | 2  | 1.0  |
| O75947  | ATP synthase subunit d, mitochondrial                                             | 1.15 | 0.046 | 2.8E-01 | 4  | 19.9 |
| Q9P2E9  | Ribosome-binding protein 1                                                        | 1.15 | 0.479 | 2.5E-01 | 6  | 5.2  |
| Q5JWF2  | Guanine nucleotide-binding protein G(s) subunit alpha isoforms XLas               | 1.14 | NA    | NA      | 2  | 3.5  |
| P06753  | Tropomyosin alpha-3 chain                                                         | 1.14 | 0.273 | 3.4E-01 | 4  | 13.0 |
| P51531  | Probable global transcription activator SNF2L2                                    | 1.14 | NA    | NA      | 2  | 1.7  |
| P62318  | Small nuclear ribonucleoprotein Sm D3                                             | 1.14 | 0.081 | 5.0E-01 | 3  | 31.7 |
| P63000  | Ras-related C3 botulinum toxin substrate 1                                        | 1.13 | 0.053 | 2.1E-01 | 4  | 24.5 |
| Q13177  | Serine/threonine-protein kinase PAK 2                                             | 1.13 | NA    | NA      | 2  | 5.9  |
| P13073  | Cytochrome c oxidase subunit 4 isoform 1, mitochondrial                           | 1.12 | 0.022 | 2.1E-02 | 4  | 25.4 |
| Q99832  | T-complex protein 1 subunit eta                                                   | 1.12 | 0.115 | 1.2E-01 | 9  | 18.2 |
| P11279  | Lysosome-associated membrane glycoprotein 1                                       | 1.12 | NA    | NA      | 2  | 4.1  |
| Q8NFBV4 | Alpha/beta hydrolase domain-containing protein 11                                 | 1.12 | NA    | NA      | 2  | 8.6  |
| P40227  | T-complex protein 1 subunit zeta                                                  | 1.12 | 0.476 | 3.2E-01 | 7  | 17.1 |
| P30049  | ATP synthase subunit delta, mitochondrial                                         | 1.12 | NA    | NA      | 2  | 13.7 |
| Q9Y6G9  | Cytoplasmic dynein 1 light intermediate chain 1                                   | 1.12 | NA    | NA      | 2  | 5.7  |
| P61225  | Ras-related protein Rap-2b                                                        | 1.12 | NA    | NA      | 2  | 10.4 |
| P50990  | T-complex protein 1 subunit theta                                                 | 1.11 | 0.089 | 1.3E-01 | 10 | 17.9 |
| P19367  | Hexokinase-1                                                                      | 1.11 | 0.675 | 7.9E-01 | 3  | 3.8  |
| P08107  | Heat shock 70 kDa protein 1A/1B                                                   | 1.11 | 0.068 | 1.6E-01 | 12 | 22.6 |
| Q13283  | Ras GTPase-activating protein-binding protein 1                                   | 1.11 | 0.144 | 5.9E-01 | 3  | 9.9  |
| Q92499  | ATP-dependent RNA helicase DDX1                                                   | 1.11 | 0.373 | 3.0E-01 | 4  | 5.4  |
| P14927  | Cytochrome b-c1 complex subunit 7                                                 | 1.11 | 2.382 | 5.8E-01 | 4  | 40.5 |
| P08134  | Rho-related GTP-binding protein RhoC                                              | 1.11 | NA    | NA      | 2  | 9.8  |
| P04040  | Catalase                                                                          | 1.11 | 1.441 | 7.9E-01 | 3  | 7.8  |
| P55884  | Eukaryotic translation initiation factor 3 subunit B                              | 1.11 | 0.262 | 6.6E-01 | 4  | 6.5  |
| P30740  | Leukocyte elastase inhibitor                                                      | 1.11 | NA    | NA      | 2  | 7.9  |
| P11310  | Medium-chain specific acyl-CoA dehydrogenase, mitochondrial                       | 1.11 | NA    | NA      | 2  | 6.2  |
| Q01844  | RNA-binding protein EWS                                                           | 1.10 | NA    | NA      | 2  | 3.4  |
| P07384  | Calpain-1 catalytic subunit                                                       | 1.10 | 0.044 | 1.6E-01 | 3  | 3.8  |
| P51812  | Ribosomal protein S6 kinase alpha-3                                               | 1.09 | 0.322 | 6.8E-01 | 3  | 4.5  |
| P50991  | T-complex protein 1 subunit delta                                                 | 1.09 | 0.255 | 4.5E-01 | 6  | 13.9 |
| P24752  | Acetyl-CoA acetyltransferase, mitochondrial                                       | 1.09 | 0.147 | 2.5E-01 | 4  | 12.2 |

Table S9-Sample UM25

|        |                                                                                                                  |      |       |         |    |      |
|--------|------------------------------------------------------------------------------------------------------------------|------|-------|---------|----|------|
| P31942 | Heterogeneous nuclear ribonucleoprotein H3                                                                       | 1.09 | NA    | NA      | 2  | 9.5  |
| P00403 | Cytochrome c oxidase subunit 2                                                                                   | 1.09 | NA    | NA      | 2  | 7.5  |
| P27708 | CAD protein                                                                                                      | 1.09 | 0.080 | 1.7E-01 | 4  | 2.1  |
| P54136 | Arginine-tRNA ligase, cytoplasmic                                                                                | 1.09 | NA    | NA      | 2  | 3.6  |
| P11387 | DNA topoisomerase 1                                                                                              | 1.08 | 0.189 | 6.3E-01 | 3  | 3.8  |
| P55084 | Trifunctional enzyme subunit beta, mitochondrial                                                                 | 1.08 | 0.122 | 2.3E-01 | 8  | 15.8 |
| P43304 | Glycerol-3-phosphate dehydrogenase, mitochondrial                                                                | 1.07 | NA    | NA      | 2  | 3.6  |
| P35232 | Prohibitin                                                                                                       | 1.07 | 0.122 | 2.7E-01 | 8  | 29.4 |
| P0C0S5 | Histone H2A.Z                                                                                                    | 1.07 | NA    | NA      | 2  | 18.8 |
| P62987 | Ubiquitin-60S ribosomal protein L40                                                                              | 1.07 | 0.458 | 3.6E-01 | 9  | 50.8 |
| P08237 | ATP-dependent 6-phosphofructokinase, muscle type                                                                 | 1.07 | 0.210 | 6.0E-01 | 4  | 6.8  |
| P01009 | Alpha-1-antitrypsin                                                                                              | 1.07 | 0.177 | 5.2E-01 | 11 | 30.4 |
| P49368 | T-complex protein 1 subunit gamma                                                                                | 1.07 | 0.079 | 1.4E-01 | 6  | 11.6 |
| O75306 | NADH dehydrogenase [ubiquinone] iron-sulfur protein 2, mitochondrial                                             | 1.07 | 0.475 | 8.6E-01 | 3  | 6.7  |
| Q86UP2 | Kinectin                                                                                                         | 1.07 | 0.592 | 6.0E-01 | 5  | 4.6  |
| P46977 | Dolichyl-diphosphooligosaccharide-protein glycosyltransferase subunit STT3A                                      | 1.06 | NA    | NA      | 2  | 2.3  |
| Q13200 | 26S proteasome non-ATPase regulatory subunit 2                                                                   | 1.06 | 0.206 | 5.5E-01 | 4  | 4.4  |
| P78527 | DNA-dependent protein kinase catalytic subunit                                                                   | 1.06 | 0.448 | 3.8E-01 | 11 | 2.6  |
| P26368 | Splicing factor U2AF 65 kDa subunit                                                                              | 1.05 | NA    | NA      | 2  | 3.8  |
| Q96FW1 | Ubiquitin thioesterase OTUB1                                                                                     | 1.05 | NA    | NA      | 2  | 6.6  |
| P28838 | Cytosol aminopeptidase                                                                                           | 1.05 | NA    | NA      | 2  | 4.4  |
| P11940 | Polyadenylate-binding protein 1                                                                                  | 1.05 | 0.146 | 4.3E-01 | 4  | 8.2  |
| Q9Y3Z3 | Deoxynucleoside triphosphate triphosphohydrolase SAMHD1                                                          | 1.04 | 0.033 | 2.5E-01 | 3  | 5.3  |
| P43307 | Translocon-associated protein subunit alpha                                                                      | 1.04 | NA    | NA      | 2  | 6.6  |
| P45880 | Voltage-dependent anion-selective channel protein 2                                                              | 1.04 | 0.762 | 6.5E-01 | 6  | 21.8 |
| O15212 | Prefoldin subunit 6                                                                                              | 1.04 | NA    | NA      | 2  | 14.0 |
| P31930 | Cytochrome b-c1 complex subunit 1, mitochondrial                                                                 | 1.04 | 0.140 | 6.3E-01 | 4  | 9.8  |
| P47756 | F-actin-capping protein subunit beta                                                                             | 1.04 | 6.390 | 7.4E-01 | 3  | 11.9 |
| P17980 | 26S protease regulatory subunit 6A                                                                               | 1.04 | NA    | NA      | 2  | 5.2  |
| Q92616 | Translational activator GCN1                                                                                     | 1.04 | NA    | NA      | 2  | 0.6  |
| P29590 | Protein PML                                                                                                      | 1.03 | 0.310 | 7.1E-01 | 4  | 5.1  |
| O75964 | ATP synthase subunit g, mitochondrial                                                                            | 1.03 | NA    | NA      | 2  | 27.2 |
| Q6UVK1 | Chondroitin sulfate proteoglycan 4                                                                               | 1.03 | 0.431 | 7.1E-01 | 3  | 2.5  |
| Q16891 | Mitochondrial inner membrane protein                                                                             | 1.03 | 0.225 | 7.8E-01 | 5  | 8.7  |
| Q9HD20 | Manganese-transporting ATPase 13A1                                                                               | 1.02 | NA    | NA      | 2  | 2.6  |
| P13987 | CD59 glycoprotein                                                                                                | 1.02 | NA    | NA      | 2  | 15.6 |
| Q8NC56 | LEM domain-containing protein 2                                                                                  | 1.02 | 0.169 | 9.0E-01 | 3  | 7.0  |
| O60664 | Penlipin-3                                                                                                       | 1.02 | NA    | NA      | 2  | 7.4  |
| Q12965 | Unconventional myosin-1e                                                                                         | 1.02 | NA    | NA      | 2  | 1.8  |
| Q9H223 | EH domain-containing protein 4                                                                                   | 1.01 | NA    | NA      | 2  | 3.3  |
| Q8IYW2 | Tetrapeptide repeat protein 40                                                                                   | 1.01 | NA    | NA      | 2  | 0.4  |
| P15311 | Ezrin                                                                                                            | 1.01 | 0.061 | 8.5E-01 | 6  | 8.7  |
| O14561 | Acyl carrier protein, mitochondrial                                                                              | 1.01 | NA    | NA      | 2  | 9.6  |
| P09622 | Dihydrolipoyl dehydrogenase, mitochondrial                                                                       | 1.01 | 0.154 | 9.2E-01 | 4  | 8.1  |
| Q9BWZ7 | Nuclear pore complex protein Nup85                                                                               | 1.01 | NA    | NA      | 2  | 2.6  |
| P46976 | Glycogenin-1                                                                                                     | 1.00 | NA    | NA      | 2  | 4.9  |
| Q15084 | Protein disulfide-isomerase A6                                                                                   | 1.00 | 0.464 | 9.8E-01 | 6  | 16.8 |
| Q92598 | Heat shock protein 105 kDa                                                                                       | 1.00 | 0.533 | 9.6E-01 | 3  | 4.1  |
| P61026 | Ras-related protein Rab-10                                                                                       | 1.00 | 0.148 | 9.9E-01 | 3  | 15.0 |
| P35221 | Catenin alpha-1                                                                                                  | 1.00 | 0.476 | 9.9E-01 | 7  | 9.4  |
| P53618 | Coatamer subunit beta                                                                                            | 1.00 | NA    | NA      | 2  | 2.1  |
| P02545 | Prelamin-A/C                                                                                                     | 0.99 | 0.463 | 9.0E-01 | 33 | 45.8 |
| P10515 | Dihydrolipoyllysine-residue acetyltransferase component of pyruvate dehydrogenase complex, mitochondrial         | 0.99 | 0.815 | 9.4E-01 | 3  | 3.9  |
| Q8N5K1 | CDGSH iron-sulfur domain-containing protein 2                                                                    | 0.99 | NA    | NA      | 2  | 15.6 |
| P33176 | Kinesin-1 heavy chain                                                                                            | 0.99 | 0.358 | 9.0E-01 | 3  | 4.7  |
| P17987 | T-complex protein 1 subunit alpha                                                                                | 0.99 | 0.427 | 8.9E-01 | 5  | 9.5  |
| Q92688 | Acidic leucine-rich nuclear phosphoprotein 32 family member B                                                    | 0.99 | NA    | NA      | 2  | 9.6  |
| P25705 | ATP synthase subunit alpha, mitochondrial                                                                        | 0.98 | 6.835 | 7.1E-01 | 14 | 27.1 |
| P27797 | Calreticulin                                                                                                     | 0.98 | 0.360 | 9.2E-01 | 6  | 18.9 |
| P06576 | ATP synthase subunit beta, mitochondrial                                                                         | 0.98 | 0.367 | 6.7E-01 | 10 | 23.6 |
| Q43242 | 26S proteasome non-ATPase regulatory subunit 3                                                                   | 0.98 | NA    | NA      | 2  | 3.0  |
| O75323 | Protein NipSnap homolog 2                                                                                        | 0.98 | NA    | NA      | 2  | 8.7  |
| Q9Y512 | Sorting and assembly machinery component 50 homolog                                                              | 0.98 | 2.995 | 9.2E-01 | 4  | 9.4  |
| P51116 | Fragile X mental retardation syndrome-related protein 2                                                          | 0.98 | NA    | NA      | 2  | 4.0  |
| P38919 | Eukaryotic initiation factor 4A-III                                                                              | 0.98 | NA    | NA      | 2  | 5.6  |
| P46459 | Vesicle-fusing ATPase                                                                                            | 0.97 | 0.425 | 8.5E-01 | 3  | 3.9  |
| P78344 | Eukaryotic translation initiation factor 4 gamma 2                                                               | 0.97 | NA    | NA      | 2  | 1.5  |
| Q99623 | Prohibitin-2                                                                                                     | 0.96 | 0.213 | 5.0E-01 | 6  | 22.7 |
| P04844 | Dolichyl-diphosphooligosaccharide-protein glycosyltransferase subunit 2                                          | 0.96 | NA    | NA      | 2  | 4.1  |
| Q15293 | Reticulocalbin-1                                                                                                 | 0.96 | 0.225 | 7.6E-01 | 4  | 13.6 |
| P17844 | Probable ATP-dependent RNA helicase DDX5                                                                         | 0.96 | 0.256 | 7.9E-01 | 3  | 4.9  |
| P09543 | 2',3'-cyclic-nucleotide 3'-phosphodiesterase                                                                     | 0.96 | 4.664 | 6.3E-01 | 8  | 15.4 |
| P26038 | Moesin                                                                                                           | 0.95 | 0.500 | 5.8E-01 | 5  | 8.1  |
| P50454 | Serpin H1                                                                                                        | 0.95 | 0.448 | 7.6E-01 | 3  | 8.9  |
| P26196 | Probable ATP-dependent RNA helicase DDX6                                                                         | 0.95 | 0.096 | 4.4E-01 | 3  | 6.2  |
| Q99442 | Translocation protein SEC62                                                                                      | 0.95 | 0.468 | 6.9E-01 | 3  | 7.3  |
| Q9UJZ1 | Stomatin-like protein 2, mitochondrial                                                                           | 0.95 | NA    | NA      | 2  | 8.7  |
| P23284 | Peptidyl-prolyl cis-trans isomerase B                                                                            | 0.95 | 0.357 | 5.6E-01 | 8  | 35.2 |
| Q13228 | Selenium-binding protein 1                                                                                       | 0.94 | NA    | NA      | 2  | 4.4  |
| P30101 | Protein disulfide-isomerase A3                                                                                   | 0.94 | 0.577 | 4.8E-01 | 12 | 22.4 |
| O15173 | Membrane-associated progesterone receptor component 2                                                            | 0.94 | 0.368 | 7.4E-01 | 4  | 22.0 |
| Q96AE4 | Far upstream element-binding protein 1                                                                           | 0.94 | 0.421 | 7.3E-01 | 3  | 3.9  |
| Q8NBS9 | Thioredoxin domain-containing protein 5                                                                          | 0.94 | 0.282 | 7.2E-01 | 5  | 10.6 |
| Q14258 | E3 ubiquitin/ISG15 ligase TRIM25                                                                                 | 0.93 | NA    | NA      | 2  | 3.8  |
| Q8NYU2 | UDP-glucose:glycoprotein glucosyltransferase 1                                                                   | 0.93 | 0.552 | 8.8E-01 | 3  | 2.3  |
| P40939 | Trifunctional enzyme subunit alpha, mitochondrial                                                                | 0.93 | 0.076 | 1.8E-01 | 12 | 18.0 |
| P52907 | F-actin-capping protein subunit alpha-1                                                                          | 0.93 | NA    | NA      | 2  | 12.2 |
| P39656 | Dolichyl-diphosphooligosaccharide-protein glycosyltransferase 48 kDa subunit                                     | 0.93 | 0.736 | 3.2E-01 | 4  | 7.9  |
| P00390 | Glutathione reductase, mitochondrial                                                                             | 0.92 | NA    | NA      | 2  | 6.3  |
| P04843 | Dolichyl-diphosphooligosaccharide-protein glycosyltransferase subunit 1                                          | 0.92 | 0.103 | 2.6E-01 | 12 | 22.6 |
| Q15691 | Microtubule-associated protein RP/EB family member 1                                                             | 0.92 | 2.326 | 7.8E-01 | 5  | 15.7 |
| P42765 | 3-ketoacyl-CoA thiolase, mitochondrial                                                                           | 0.92 | 0.191 | 6.2E-01 | 4  | 11.6 |
| P14854 | Cytochrome c oxidase subunit 6B1                                                                                 | 0.91 | 1.720 | 8.5E-01 | 3  | 24.4 |
| P42167 | Lamina-associated polypeptide 2, isoforms beta/gamma                                                             | 0.91 | 1.337 | 7.7E-01 | 3  | 7.3  |
| Q53GQ0 | Estradiol 17-beta-dehydrogenase 12                                                                               | 0.90 | 0.140 | 3.6E-01 | 4  | 13.1 |
| Q9BRX8 | Redox-regulatory protein FAM213A                                                                                 | 0.90 | 0.088 | 2.9E-01 | 3  | 13.1 |
| Q13561 | Dynactin subunit 2                                                                                               | 0.90 | 0.124 | 2.5E-01 | 6  | 16.2 |
| P11498 | Pyruvate carboxylase, mitochondrial                                                                              | 0.90 | NA    | NA      | 2  | 2.1  |
| P30519 | Heme oxygenase 2                                                                                                 | 0.90 | NA    | NA      | 2  | 10.1 |
| Q7L5N1 | COP9 signalosome complex subunit 6                                                                               | 0.90 | 0.134 | 3.6E-01 | 3  | 14.1 |
| Q7KZF4 | Staphylococcal nuclease domain-containing protein 1                                                              | 0.90 | 0.275 | 6.5E-01 | 4  | 6.5  |
| P62805 | Histone H4                                                                                                       | 0.89 | 0.175 | 5.8E-02 | 7  | 52.4 |
| Q9Y224 | UPF0568 protein C14orf166                                                                                        | 0.89 | NA    | NA      | 2  | 6.1  |
| P01860 | Ig gamma-3 chain C region                                                                                        | 0.89 | NA    | NA      | 2  | 6.4  |
| Q9UNH7 | Sorting nexin-6                                                                                                  | 0.89 | NA    | NA      | 2  | 3.2  |
| P22059 | Oxysterol-binding protein 1                                                                                      | 0.89 | NA    | NA      | 2  | 2.9  |
| P51572 | B-cell receptor-associated protein 31                                                                            | 0.88 | 2.170 | 4.1E-01 | 7  | 25.6 |
| P60953 | Cell division control protein 42 homolog                                                                         | 0.88 | NA    | NA      | 2  | 11.0 |
| P36957 | Dihydrolipoyllysine-residue succinyltransferase component of 2-oxoglutarate dehydrogenase complex, mitochondrial | 0.88 | 0.071 | 1.2E-01 | 4  | 9.9  |
| P14314 | Glucosidase 2 subunit beta                                                                                       | 0.88 | 0.753 | 3.9E-01 | 8  | 12.1 |
| Q96QK1 | Vacuolar protein sorting-associated protein 35                                                                   | 0.88 | NA    | NA      | 2  | 3.0  |
| Q99653 | Calcineurin B homologous protein 1                                                                               | 0.87 | NA    | NA      | 2  | 11.8 |
| Q9BVK6 | Transmembrane emp24 domain-containing protein 9                                                                  | 0.87 | NA    | NA      | 2  | 6.8  |
| P01042 | Kininogen-1                                                                                                      | 0.87 | 0.236 | 4.2E-01 | 5  | 7.3  |
| Q09666 | Neuroblast differentiation-associated protein AHNAK                                                              | 0.87 | 0.094 | 1.2E-03 | 95 | 15.7 |

Table S9-Sample UM25

|        |                                                                  |      |       |         |    |      |
|--------|------------------------------------------------------------------|------|-------|---------|----|------|
| Q14847 | LIM and SH3 domain protein 1                                     | 0.87 | NA    | NA      | 2  | 9.6  |
| Q9Y310 | tRNA-splicing ligase RtcB homolog                                | 0.86 | NA    | NA      | 2  | 5.0  |
| O43707 | Alpha-actinin-4                                                  | 0.86 | 0.063 | 1.8E-02 | 14 | 19.1 |
| P10606 | Cytochrome c oxidase subunit 5B, mitochondrial                   | 0.86 | 0.042 | 1.0E-02 | 5  | 30.2 |
| P54577 | Tyrosine-tRNA ligase, cytoplasmic                                | 0.86 | NA    | NA      | 2  | 4.4  |
| Q9Y230 | RuvB-like 2                                                      | 0.85 | NA    | NA      | 2  | 5.2  |
| P31689 | DnaJ homolog subfamily A member 1                                | 0.85 | NA    | NA      | 2  | 4.8  |
| Q14203 | Dynactin subunit 1                                               | 0.85 | 0.649 | 5.2E-01 | 3  | 3.3  |
| P30048 | Thioredoxin-dependent peroxide reductase, mitochondrial          | 0.85 | 0.426 | 5.0E-01 | 4  | 17.2 |
| O75165 | DnaJ homolog subfamily C member 13                               | 0.85 | 0.291 | 4.0E-01 | 3  | 1.3  |
| Q03252 | Lamin-B2                                                         | 0.85 | 0.092 | 4.5E-02 | 20 | 32.7 |
| Q16695 | Histone H3.1t                                                    | 0.85 | 0.061 | 2.9E-02 | 3  | 14.7 |
| P01023 | Alpha-2-macroglobulin                                            | 0.84 | 0.104 | 8.8E-02 | 7  | 6.0  |
| P24539 | ATP synthase F(0) complex subunit B1, mitochondrial              | 0.84 | NA    | NA      | 2  | 9.0  |
| P02511 | Alpha-crystallin B chain                                         | 0.84 | 0.169 | 1.0E-01 | 6  | 35.4 |
| P04179 | Superoxide dismutase [Mn], mitochondrial                         | 0.84 | 0.176 | 1.7E-01 | 5  | 20.3 |
| O95202 | LETM1 and EF-hand domain-containing protein 1, mitochondrial     | 0.84 | NA    | NA      | 2  | 3.2  |
| P11021 | 78 kDa glucose-regulated protein                                 | 0.83 | 0.102 | 6.5E-03 | 23 | 35.0 |
| P50993 | Sodium/potassium-transporting ATPase subunit alpha-2             | 0.83 | NA    | NA      | 2  | 2.5  |
| P17655 | Calpain-2 catalytic subunit                                      | 0.83 | 0.117 | 1.6E-01 | 6  | 7.4  |
| P35222 | Catenin beta-1                                                   | 0.83 | 0.165 | 5.6E-01 | 4  | 6.1  |
| P55072 | Transitional endoplasmic reticulum ATPase                        | 0.83 | 0.069 | 3.6E-03 | 12 | 15.5 |
| Q9NR46 | Endophilin-B2                                                    | 0.82 | NA    | NA      | 2  | 5.3  |
| Q92973 | Transportin-1                                                    | 0.82 | 0.195 | 4.0E-01 | 4  | 6.1  |
| Q9P2R7 | Succinyl-CoA ligase [ADP-forming] subunit beta, mitochondrial    | 0.81 | NA    | NA      | 2  | 4.1  |
| Q9UHV9 | Prefoldin subunit 2                                              | 0.81 | NA    | NA      | 2  | 16.9 |
| P07237 | Protein disulfide-isomerase                                      | 0.81 | 0.108 | 2.1E-02 | 12 | 20.7 |
| O75915 | PRA1 family protein 3                                            | 0.80 | NA    | NA      | 2  | 9.6  |
| P13861 | cAMP-dependent protein kinase type II-alpha regulatory subunit   | 0.80 | 0.067 | 4.6E-02 | 3  | 7.4  |
| P00352 | Retinal dehydrogenase 1                                          | 0.80 | 0.288 | 1.3E-01 | 5  | 13.8 |
| Q9UHD8 | Septin-9                                                         | 0.80 | 0.081 | 2.7E-02 | 4  | 7.2  |
| P20339 | Ras-related protein Rab-5A                                       | 0.80 | NA    | NA      | 2  | 10.7 |
| Q13596 | Sorting nexin-1                                                  | 0.80 | NA    | NA      | 2  | 5.2  |
| P05023 | Sodium/potassium-transporting ATPase subunit alpha-1             | 0.79 | 0.041 | 1.3E-03 | 12 | 13.7 |
| Q07157 | Tight junction protein ZO-1                                      | 0.79 | NA    | NA      | 2  | 1.5  |
| Q13011 | Delta(3,5)-Delta(2,4)-dienoyl-CoA isomerase, mitochondrial       | 0.79 | 0.159 | 2.8E-01 | 4  | 11.9 |
| Q15435 | Protein phosphatase 1 regulatory subunit 7                       | 0.79 | NA    | NA      | 2  | 6.4  |
| P00367 | Glutamate dehydrogenase 1, mitochondrial                         | 0.79 | 0.073 | 4.5E-02 | 5  | 12.2 |
| O96008 | Mitochondrial import receptor subunit TOM40 homolog              | 0.79 | NA    | NA      | 2  | 4.7  |
| P46939 | Utrophin                                                         | 0.78 | 0.085 | 5.3E-02 | 3  | 1.0  |
| Q99714 | 3-hydroxyacyl-CoA dehydrogenase type-2                           | 0.78 | 0.130 | 4.4E-01 | 3  | 11.5 |
| Q00325 | Phosphate carrier protein, mitochondrial                         | 0.78 | 0.076 | 3.8E-02 | 4  | 11.6 |
| P36969 | Phospholipid hydroperoxide glutathione peroxidase, mitochondrial | 0.78 | NA    | NA      | 2  | 10.2 |
| Q07065 | Cytoskeleton-associated protein 4                                | 0.78 | 0.120 | 8.8E-02 | 5  | 11.1 |
| O94832 | Unconventional myosin-Ic                                         | 0.78 | 0.355 | 2.1E-01 | 6  | 6.6  |
| P0C0L5 | Complement C4-B                                                  | 0.78 | 0.076 | 6.2E-03 | 9  | 5.0  |
| P10619 | Lysosomal protective protein                                     | 0.78 | NA    | NA      | 2  | 5.4  |
| P20674 | Cytochrome c oxidase subunit 5A, mitochondrial                   | 0.78 | 0.115 | 1.3E-01 | 5  | 25.3 |
| Q9UHG3 | Prelycysteine oxidase 1                                          | 0.78 | 0.074 | 5.7E-02 | 3  | 6.3  |
| P53396 | ATP-citrate synthase                                             | 0.78 | NA    | NA      | 2  | 1.8  |
| O60313 | Dynamin-like 120 kDa protein, mitochondrial                      | 0.77 | 0.122 | 9.5E-02 | 6  | 7.6  |
| P09496 | Clathrin light chain A                                           | 0.77 | 0.091 | 2.4E-01 | 3  | 9.3  |
| P17931 | Galectin-3                                                       | 0.77 | 0.136 | 1.4E-02 | 7  | 31.2 |
| Q7L576 | Cytoplasmic FMR1-interacting protein 1                           | 0.76 | NA    | NA      | 2  | 1.8  |
| O94919 | Endonuclease domain-containing 1 protein                         | 0.76 | 0.125 | 8.0E-02 | 4  | 8.6  |
| Q9UQE7 | Structural maintenance of chromosomes protein 3                  | 0.75 | 0.042 | 1.9E-02 | 4  | 4.4  |
| Q13423 | NAD(P) transhydrogenase, mitochondrial                           | 0.75 | 0.410 | 2.6E-01 | 3  | 3.3  |
| P04217 | Alpha-1B-glycoprotein                                            | 0.75 | NA    | NA      | 2  | 4.8  |
| Q8WUM4 | Programmed cell death 6-interacting protein                      | 0.75 | 0.050 | 1.6E-03 | 7  | 8.1  |
| P49419 | Alpha-aminoadipic semialdehyde dehydrogenase                     | 0.74 | NA    | NA      | 2  | 4.5  |
| Q13162 | Peroxisome oxidase-4                                             | 0.73 | NA    | NA      | 2  | 8.9  |
| P05107 | Integrin beta-2                                                  | 0.73 | 2.098 | 5.3E-01 | 3  | 4.4  |
| Q93009 | Ubiquitin carboxyl-terminal hydrolase 7                          | 0.73 | NA    | NA      | 2  | 1.8  |
| P67870 | Casein kinase II subunit beta                                    | 0.73 | NA    | NA      | 2  | 8.8  |
| P35637 | RNA-binding protein FUS                                          | 0.73 | NA    | NA      | 2  | 3.0  |
| Q9Y4L1 | Hypoxia up-regulated protein 1                                   | 0.72 | NA    | NA      | 2  | 2.4  |
| Q02818 | Nucleobindin-1                                                   | 0.72 | NA    | NA      | 2  | 6.5  |
| Q9NTJ5 | Phosphatidylinositol phosphatase SAC1                            | 0.72 | 0.093 | 7.8E-02 | 3  | 4.8  |
| P06899 | Histone H2B type 1-J                                             | 0.71 | NA    | NA      | 2  | 7.9  |
| P08603 | Complement factor H                                              | 0.71 | NA    | NA      | 2  | 1.8  |
| P09382 | Galectin-1                                                       | 0.71 | 0.061 | 2.4E-05 | 5  | 43.7 |
| P54920 | Alpha-soluble NSF attachment protein                             | 0.70 | 0.064 | 6.9E-03 | 4  | 16.6 |
| P18859 | ATP synthase-coupling factor 6, mitochondrial                    | 0.70 | 0.111 | 1.6E-01 | 3  | 31.5 |
| Q9Y4F1 | FERM, RhoGEF and pleckstrin domain-containing protein 1          | 0.70 | NA    | NA      | 2  | 1.9  |
| Q15942 | Zyxin                                                            | 0.69 | NA    | NA      | 2  | 5.4  |
| Q12797 | Aspartyl/asparaginyl beta-hydroxylase                            | 0.69 | 0.261 | 1.4E-01 | 5  | 7.0  |
| Q632Y3 | KN motif and ankyrin repeat domain-containing protein 2          | 0.68 | NA    | NA      | 2  | 4.2  |
| Q02218 | 2-oxoglutarate dehydrogenase, mitochondrial                      | 0.67 | 0.085 | 2.5E-03 | 4  | 4.1  |
| O75844 | CAAX prenyl protease 1 homolog                                   | 0.67 | NA    | NA      | 2  | 3.8  |
| O60884 | DnaJ homolog subfamily A member 2                                | 0.67 | NA    | NA      | 2  | 4.4  |
| Q94979 | Protein transport protein Sec31A                                 | 0.67 | NA    | NA      | 2  | 1.3  |
| Q6DD88 | Atlastin-3                                                       | 0.67 | NA    | NA      | 2  | 4.1  |
| P53621 | Coatomer subunit alpha                                           | 0.66 | 0.074 | 3.4E-02 | 4  | 3.4  |
| Q9BS26 | Endoplasmic reticulum resident protein 44                        | 0.66 | 0.025 | 6.2E-06 | 3  | 7.9  |
| P17612 | cAMP-dependent protein kinase catalytic subunit alpha            | 0.66 | NA    | NA      | 2  | 4.3  |
| Q00765 | Receptor expression-enhancing protein 5                          | 0.66 | NA    | NA      | 2  | 10.6 |
| P01024 | Complement C3                                                    | 0.64 | 0.164 | 1.0E-02 | 18 | 11.2 |
| O95865 | N(G),N(G)-dimethylarginine dimethylaminohydrolase 2              | 0.64 | NA    | NA      | 2  | 8.4  |
| P07358 | Complement component C8 beta chain                               | 0.64 | 0.356 | 2.0E-01 | 4  | 7.6  |
| O75746 | Calcium-binding mitochondrial carrier protein Aralar1            | 0.64 | NA    | NA      | 2  | 4.6  |
| P06727 | Apolipoprotein A-IV                                              | 0.63 | 0.067 | 3.6E-05 | 11 | 23.5 |
| O00264 | Membrane-associated progesterone receptor component 1            | 0.63 | 0.172 | 4.4E-02 | 3  | 12.3 |
| Q6NZ12 | Polymerase I and transcript release factor                       | 0.63 | 0.113 | 1.4E-02 | 6  | 19.2 |
| Q9HDC9 | Adipocyte plasma membrane-associated protein                     | 0.63 | 0.018 | 1.8E-04 | 3  | 7.7  |
| P60709 | Actin, cytoplasmic 1                                             | 0.63 | 0.045 | 2.3E-05 | 6  | 24.8 |
| Q14204 | Cytoplasmic dynein 1 heavy chain 1                               | 0.62 | 0.037 | 1.3E-10 | 20 | 4.3  |
| Q14344 | Guanine nucleotide-binding protein subunit alpha-13              | 0.62 | 0.279 | 7.1E-02 | 7  | 22.3 |
| Q9NVD7 | Alpha-parvin                                                     | 0.62 | 0.099 | 1.6E-01 | 3  | 9.1  |
| Q14254 | Flotillin-2                                                      | 0.62 | NA    | NA      | 2  | 4.7  |
| P05091 | Aldehyde dehydrogenase, mitochondrial                            | 0.62 | 0.172 | 1.6E-02 | 3  | 6.0  |
| P43121 | Cell surface glycoprotein MUC18                                  | 0.62 | 0.244 | 1.3E-01 | 4  | 6.8  |
| P08571 | Monocyte differentiation antigen CD14                            | 0.62 | NA    | NA      | 2  | 5.3  |
| P50995 | Annexin A11                                                      | 0.61 | 0.143 | 5.1E-02 | 3  | 5.7  |
| Q00610 | Clathrin heavy chain 1                                           | 0.61 | 0.042 | 3.4E-10 | 28 | 18.0 |
| P27824 | Calnexin                                                         | 0.61 | 0.166 | 7.2E-02 | 7  | 13.5 |
| Q9NQC3 | Reticulon-4                                                      | 0.61 | 0.035 | 3.6E-08 | 3  | 2.7  |
| P14625 | Endoplasmic reticulum chaperone                                  | 0.61 | 0.061 | 7.6E-08 | 12 | 15.6 |
| P12235 | ADP/ATP translocase 1                                            | 0.60 | 0.031 | 5.2E-03 | 3  | 11.1 |
| Q9Y6N5 | Sulfide:quinone oxidoreductase, mitochondrial                    | 0.60 | 0.127 | 8.8E-03 | 5  | 12.9 |
| O00159 | Unconventional myosin-Ic                                         | 0.59 | 0.056 | 1.1E-04 | 6  | 5.6  |
| O43865 | Putative adenosylhomocysteinase 2                                | 0.59 | 0.133 | 1.7E-01 | 3  | 4.2  |
| P08174 | Complement decay-accelerating factor                             | 0.59 | NA    | NA      | 2  | 3.9  |
| Q969G5 | Protein kinase C delta-binding protein                           | 0.59 | 0.139 | 4.5E-02 | 3  | 7.7  |
| P49748 | Very long-chain specific acyl-CoA dehydrogenase, mitochondrial   | 0.59 | 0.074 | 4.9E-03 | 4  | 6.4  |
| A0FGR8 | Extended synaptotagmin-2                                         | 0.58 | NA    | NA      | 2  | 3.0  |

Table S9-Sample UM25

|        |                                                                   |      |       |         |    |      |
|--------|-------------------------------------------------------------------|------|-------|---------|----|------|
| P00738 | Haptoglobin                                                       | 0.58 | 0.090 | 1.7E-02 | 7  | 15.8 |
| Q9P0M6 | Core histone macro-H2A.2                                          | 0.57 | 0.230 | 1.8E-01 | 3  | 12.6 |
| Q6NUK1 | Calcium-binding mitochondrial carrier protein SCaMC-1             | 0.57 | NA    | NA      | 2  | 4.4  |
| Q07954 | Prolow-density lipoprotein receptor-related protein 1             | 0.57 | 0.159 | 1.1E-02 | 8  | 2.4  |
| P48681 | Nestin                                                            | 0.56 | NA    | NA      | 2  | 1.5  |
| P21589 | 5'-nucleotidase                                                   | 0.56 | 0.133 | 2.3E-02 | 3  | 5.9  |
| Q92734 | Protein TFG                                                       | 0.56 | NA    | NA      | 2  | 4.5  |
| P40763 | Signal transducer and activator of transcription 3                | 0.55 | NA    | NA      | 2  | 3.6  |
| Q9BQE3 | Tubulin alpha-1C chain                                            | 0.55 | NA    | NA      | 2  | 6.7  |
| Q15836 | Vesicle-associated membrane protein 3                             | 0.55 | NA    | NA      | 2  | 24.0 |
| P13667 | Protein disulfide-isomerase A4                                    | 0.54 | 0.050 | 6.0E-03 | 3  | 5.4  |
| Q9H444 | Charged multivesicular body protein 4b                            | 0.54 | 0.347 | 3.0E-01 | 3  | 15.2 |
| P08133 | Annexin A6                                                        | 0.54 | 0.047 | 2.6E-13 | 26 | 43.5 |
| Q05682 | Caldesmon                                                         | 0.54 | 0.166 | 3.0E-02 | 3  | 5.2  |
| P16615 | Sarcoplasmic/endoplasmic reticulum calcium ATPase 2               | 0.53 | 0.083 | 4.8E-04 | 6  | 6.7  |
| Q99584 | Protein S100-A13                                                  | 0.53 | 0.103 | 3.1E-04 | 3  | 33.7 |
| P00747 | Plasminogen                                                       | 0.53 | 0.140 | 2.6E-03 | 7  | 10.6 |
| P01903 | HLA class II histocompatibility antigen, DR alpha chain           | 0.53 | 0.090 | 3.5E-03 | 4  | 21.3 |
| P01893 | Putative HLA class I histocompatibility antigen, alpha chain H    | 0.52 | NA    | NA      | 2  | 5.8  |
| Q01082 | Spectrin beta chain, non-erythrocytic 1                           | 0.52 | 0.029 | 0.0E+00 | 49 | 25.0 |
| Q9HBL0 | Tensin-1                                                          | 0.51 | 0.312 | 2.2E-01 | 4  | 4.1  |
| P35580 | Myosin-10                                                         | 0.51 | 0.058 | 4.2E-06 | 15 | 8.8  |
| Q03591 | Complement factor H-related protein 1                             | 0.51 | NA    | NA      | 2  | 9.4  |
| P09497 | Clathrin light chain B                                            | 0.50 | NA    | NA      | 2  | 8.3  |
| Q9H0D6 | 5'-3' exoribonuclease 2                                           | 0.50 | NA    | NA      | 2  | 2.6  |
| Q14764 | Major vault protein                                               | 0.49 | 0.139 | 1.2E-02 | 3  | 3.7  |
| P29992 | Guanine nucleotide-binding protein subunit alpha-11               | 0.49 | 0.155 | 9.4E-02 | 3  | 10.9 |
| P23634 | Plasma membrane calcium-transporting ATPase 4                     | 0.49 | NA    | NA      | 2  | 2.4  |
| P48735 | Isocitrate dehydrogenase [NADP], mitochondrial                    | 0.49 | 0.090 | 9.1E-04 | 3  | 7.7  |
| Q15582 | Transforming growth factor-beta-induced protein ig-h3             | 0.49 | NA    | NA      | 2  | 3.5  |
| Q95197 | Reticulon-3                                                       | 0.48 | NA    | NA      | 2  | 1.6  |
| P12814 | Alpha-actinin-1                                                   | 0.48 | 0.053 | 1.6E-07 | 13 | 20.6 |
| Q94905 | Erlin-2                                                           | 0.48 | 0.068 | 2.0E-04 | 6  | 17.4 |
| Q16181 | Septin-7                                                          | 0.48 | 0.048 | 6.9E-05 | 5  | 12.4 |
| Q14956 | Transmembrane glycoprotein NMB                                    | 0.48 | 0.246 | 2.0E-02 | 3  | 6.5  |
| Q9Y490 | Talin-1                                                           | 0.48 | 0.042 | 1.3E-15 | 25 | 12.6 |
| Q13813 | Spectrin alpha chain, non-erythrocytic 1                          | 0.48 | 0.021 | 0.0E+00 | 65 | 28.2 |
| P20073 | Annexin A7                                                        | 0.48 | 0.104 | 3.6E-02 | 4  | 10.9 |
| P61764 | Syntaxin-binding protein 1                                        | 0.48 | NA    | NA      | 2  | 4.4  |
| P04899 | Guanine nucleotide-binding protein G(i) subunit alpha-2           | 0.48 | NA    | NA      | 2  | 6.2  |
| P05362 | Intercellular adhesion molecule 1                                 | 0.47 | 0.174 | 4.0E-02 | 4  | 7.9  |
| P54289 | Voltage-dependent calcium channel subunit alpha-2/delta-1         | 0.47 | NA    | NA      | 2  | 2.1  |
| P63010 | AP-2 complex subunit beta                                         | 0.47 | 0.150 | 9.8E-03 | 5  | 4.7  |
| P32119 | Peroxiredoxin-2                                                   | 0.47 | 0.066 | 1.8E-06 | 5  | 19.7 |
| P61769 | Beta-2-microglobulin                                              | 0.47 | 0.550 | 4.8E-01 | 3  | 19.3 |
| O14950 | Myosin regulatory light chain 12B                                 | 0.47 | 0.056 | 8.4E-08 | 3  | 12.8 |
| Q86VB7 | Scavenger receptor cysteine-rich type 1 protein M130              | 0.47 | NA    | NA      | 2  | 1.8  |
| P05090 | Apolipoprotein D                                                  | 0.46 | NA    | NA      | 2  | 12.7 |
| O95782 | AP-2 complex subunit alpha-1                                      | 0.44 | 0.267 | 1.1E-01 | 3  | 3.3  |
| P60033 | CD81 antigen                                                      | 0.44 | NA    | NA      | 2  | 11.9 |
| P35556 | Fibrillin-2                                                       | 0.44 | NA    | NA      | 2  | 0.6  |
| P07305 | Histone H1.0                                                      | 0.43 | 0.095 | 6.7E-02 | 3  | 16.0 |
| P06756 | Integrin alpha-V                                                  | 0.42 | NA    | NA      | 2  | 1.4  |
| Q93052 | Lipoma-preferred partner                                          | 0.41 | NA    | NA      | 2  | 4.2  |
| Q7Z7G0 | Target of Nesh-SH3                                                | 0.40 | NA    | NA      | 2  | 1.7  |
| P07197 | Neurofilament medium polypeptide                                  | 0.40 | NA    | NA      | 2  | 2.5  |
| Q13425 | Beta-2-syntrophin                                                 | 0.39 | 0.326 | 2.3E-01 | 4  | 5.7  |
| Q6UXB8 | Peptidase inhibitor 16                                            | 0.39 | NA    | NA      | 2  | 5.2  |
| Q03135 | Caveolin-1                                                        | 0.38 | NA    | NA      | 2  | 13.5 |
| P09619 | Platelet-derived growth factor receptor beta                      | 0.37 | NA    | NA      | 2  | 2.3  |
| Q14824 | Inter-alpha-trypsin inhibitor heavy chain H4                      | 0.36 | NA    | NA      | 2  | 2.2  |
| Q96CX2 | BTB/POZ domain-containing protein KCTD12                          | 0.36 | NA    | NA      | 2  | 5.5  |
| P02749 | Beta-2-glycoprotein 1                                             | 0.33 | NA    | NA      | 2  | 7.0  |
| Q9BS40 | Latexin                                                           | 0.33 | NA    | NA      | 2  | 12.2 |
| P04216 | Thy-1 membrane glycoprotein                                       | 0.33 | NA    | NA      | 2  | 15.5 |
| P13671 | Complement component C6                                           | 0.32 | NA    | NA      | 2  | 2.6  |
| P08311 | Cathepsin G                                                       | 0.29 | NA    | NA      | 2  | 6.7  |
| P23946 | Chymase                                                           | 0.28 | NA    | NA      | 2  | 10.1 |
| P05164 | Myeloperoxidase                                                   | 0.27 | 0.188 | 9.1E-02 | 3  | 4.8  |
| P61626 | Lysozyme C                                                        | 0.27 | NA    | NA      | 2  | 12.8 |
| P02654 | Apolipoprotein C-I                                                | 0.26 | NA    | NA      | 2  | 24.1 |
| P10643 | Complement component C7                                           | 0.26 | 0.140 | 1.3E-01 | 3  | 4.5  |
| P41222 | Prostaglandin-H2 D-isomerase                                      | 0.25 | NA    | NA      | 2  | 12.1 |
| Q9NY15 | Stabilin-1                                                        | 0.24 | NA    | NA      | 2  | 1.0  |
| O00468 | Agrin                                                             | 0.24 | NA    | NA      | 2  | 1.2  |
| P22105 | Tenascin-X                                                        | 0.23 | 0.239 | 1.1E-01 | 4  | 1.1  |
| P16157 | Ankyrin-1                                                         | 0.23 | NA    | NA      | 2  | 1.5  |
| P43320 | Beta-crystallin B2                                                | 0.22 | NA    | NA      | 2  | 11.7 |
| Q01995 | Transgelin                                                        | 0.21 | NA    | NA      | 2  | 9.5  |
| Q9UBX5 | Fibulin-5                                                         | 0.20 | NA    | NA      | 2  | 3.6  |
| P58166 | Inhibin beta E chain                                              | 0.20 | NA    | NA      | 2  | 6.6  |
| Q12805 | EGF-containing fibulin-like extracellular matrix protein 1        | 0.19 | NA    | NA      | 2  | 3.9  |
| P15144 | Aminopeptidase N                                                  | 0.19 | NA    | NA      | 2  | 2.6  |
| Q9BXN1 | Asporin                                                           | 0.19 | NA    | NA      | 2  | 2.9  |
| P80723 | Brain acid soluble protein 1                                      | 0.19 | 0.177 | 3.2E-01 | 3  | 18.1 |
| Q14767 | Latent-transforming growth factor beta-binding protein 2          | 0.19 | NA    | NA      | 2  | 1.6  |
| P03973 | Antileukoproteinase                                               | 0.17 | NA    | NA      | 2  | 15.9 |
| P26447 | Protein S100-A4                                                   | 0.16 | NA    | NA      | 2  | 18.8 |
| Q24844 | Myosin regulatory light polypeptide 9                             | 0.16 | NA    | NA      | 2  | 12.2 |
| Q2UY09 | Collagen alpha-1(XXVIII) chain                                    | 0.14 | NA    | NA      | 2  | 1.8  |
| P63211 | Guanine nucleotide-binding protein G(T) subunit gamma-T1          | 0.13 | NA    | NA      | 2  | 20.3 |
| P22352 | Glutathione peroxidase 3                                          | 0.12 | NA    | NA      | 2  | 8.0  |
| P08123 | Collagen alpha-2(I) chain                                         | 0.10 | NA    | NA      | 2  | 2.4  |
| O43301 | Heat shock 70 kDa protein 12A                                     | 0.45 | 0.060 | 4.0E-04 | 6  | 10.7 |
| Q15019 | Septin-2                                                          | 0.45 | 0.072 | 7.8E-04 | 6  | 20.8 |
| P00387 | NADH-cytochrome b5 reductase 3                                    | 0.45 | 0.165 | 1.7E-02 | 7  | 24.6 |
| P05556 | Integrin beta-1                                                   | 0.45 | 0.071 | 5.8E-06 | 6  | 8.0  |
| P06396 | Gelsolin                                                          | 0.44 | 0.097 | 5.1E-06 | 11 | 17.3 |
| O75369 | Filamin-B                                                         | 0.44 | 0.112 | 1.9E-03 | 8  | 5.0  |
| Q9BTV4 | Transmembrane protein 43                                          | 0.43 | 0.116 | 5.7E-03 | 3  | 8.8  |
| P67936 | Tropomyosin alpha-4 chain                                         | 0.43 | 0.150 | 1.1E-03 | 8  | 25.0 |
| P18206 | Vinculin                                                          | 0.42 | 0.090 | 8.2E-07 | 14 | 15.3 |
| Q9BSJ8 | Extended synaptotagmin-1                                          | 0.41 | 0.194 | 1.3E-02 | 5  | 5.8  |
| P46821 | Microtubule-associated protein 1B                                 | 0.41 | 0.145 | 3.6E-02 | 3  | 1.3  |
| Q9NZN4 | EH domain-containing protein 2                                    | 0.41 | 0.062 | 2.7E-03 | 3  | 5.7  |
| P00450 | Ceruloplasmin                                                     | 0.41 | 0.066 | 3.0E-08 | 9  | 11.2 |
| P07355 | Annexin A2                                                        | 0.40 | 0.039 | 0.0E+00 | 24 | 54.6 |
| P35579 | Myosin-9                                                          | 0.40 | 0.036 | 0.0E+00 | 51 | 26.7 |
| P60660 | Myosin light polypeptide 6                                        | 0.40 | 0.031 | 0.0E+00 | 6  | 47.7 |
| P11166 | Solute carrier family 2, facilitated glucose transporter member 1 | 0.39 | 0.088 | 2.8E-05 | 3  | 5.5  |
| P01011 | Alpha-1-antichymotrypsin                                          | 0.37 | 0.097 | 9.8E-05 | 7  | 18.4 |
| P22413 | Ectonucleotide pyrophosphatase/phosphodiesterase family member 1  | 0.36 | 0.088 | 3.4E-02 | 3  | 4.4  |
| P21333 | Filamin-A                                                         | 0.35 | 0.037 | 0.0E+00 | 45 | 23.3 |
| P00167 | Cytochrome b5                                                     | 0.34 | 0.089 | 1.1E-04 | 4  | 42.5 |
| P07099 | Epoxide hydrolase 1                                               | 0.34 | 0.063 | 3.2E-06 | 4  | 9.0  |

Table S9-Sample UM25

|        |                                                                      |      |       |         |    |      |
|--------|----------------------------------------------------------------------|------|-------|---------|----|------|
| P12111 | Collagen alpha-3(VI) chain                                           | 0.34 | 0.040 | 0.0E+00 | 32 | 11.1 |
| Q16555 | Dihydropyrimidinase-related protein 2                                | 0.34 | 0.073 | 1.4E-10 | 10 | 21.0 |
| Q16363 | Laminin subunit alpha-4                                              | 0.33 | 0.096 | 1.2E-02 | 3  | 2.1  |
| P09493 | Tropomyosin alpha-1 chain                                            | 0.32 | 0.194 | 1.8E-04 | 5  | 14.8 |
| Q9NZM1 | Myoferlin                                                            | 0.32 | 0.091 | 9.7E-06 | 5  | 3.0  |
| Q02952 | A-kinase anchor protein 12                                           | 0.31 | 0.110 | 1.3E-04 | 14 | 11.1 |
| O94911 | ATP-binding cassette sub-family A member 8                           | 0.31 | 0.052 | 3.9E-05 | 4  | 2.8  |
| Q9Y6C2 | EMILIN-1                                                             | 0.31 | 0.134 | 2.3E-04 | 7  | 9.2  |
| P08572 | Collagen alpha-2(IV) chain                                           | 0.31 | 0.150 | 8.3E-04 | 7  | 5.4  |
| P02549 | Spectrin alpha chain, erythrocytic 1                                 | 0.31 | 0.174 | 1.3E-04 | 7  | 4.1  |
| P04196 | Histidine-rich glycoprotein                                          | 0.31 | 0.102 | 1.3E-03 | 3  | 5.3  |
| P12109 | Collagen alpha-1(VI) chain                                           | 0.30 | 0.063 | 3.9E-06 | 9  | 9.5  |
| P02679 | Fibrinogen gamma chain                                               | 0.30 | 0.189 | 2.4E-03 | 7  | 19.2 |
| P36269 | Gamma-glutamyltransferase 5                                          | 0.29 | 0.168 | 3.2E-03 | 6  | 12.8 |
| P60903 | Protein S100-A10                                                     | 0.29 | 0.096 | 1.2E-04 | 4  | 35.1 |
| P12110 | Collagen alpha-2(VI) chain                                           | 0.28 | 0.085 | 3.5E-08 | 8  | 8.5  |
| O43491 | Band 4.1-like protein 2                                              | 0.28 | 0.064 | 2.7E-05 | 6  | 8.1  |
| P02751 | Fibronectin                                                          | 0.28 | 0.098 | 8.2E-07 | 8  | 4.5  |
| P08294 | Extracellular superoxide dismutase [Cu-Zn]                           | 0.27 | 0.111 | 2.8E-04 | 3  | 15.4 |
| P55268 | Laminin subunit beta-2                                               | 0.27 | 0.114 | 5.9E-06 | 11 | 6.4  |
| Q05707 | Collagen alpha-1(XIV) chain                                          | 0.27 | 0.102 | 1.2E-03 | 6  | 3.8  |
| O94875 | Sorbin and SH3 domain-containing protein 2                           | 0.27 | 0.178 | 8.0E-03 | 4  | 5.5  |
| P50895 | Basal cell adhesion molecule                                         | 0.27 | 0.127 | 4.5E-04 | 4  | 8.8  |
| P07942 | Laminin subunit beta-1                                               | 0.26 | 0.185 | 6.7E-03 | 4  | 2.6  |
| P02675 | Fibrinogen beta chain                                                | 0.26 | 0.086 | 7.2E-06 | 9  | 23.4 |
| P27105 | Erythrocyte band 7 integral membrane protein                         | 0.25 | 0.077 | 5.5E-06 | 7  | 22.9 |
| P02760 | Protein AMBP                                                         | 0.25 | 0.136 | 1.5E-04 | 5  | 22.2 |
| Q14112 | Nidogen-2                                                            | 0.25 | 0.137 | 1.8E-05 | 7  | 4.9  |
| P39059 | Collagen alpha-1(XV) chain                                           | 0.25 | 0.166 | 2.9E-04 | 5  | 3.9  |
| P68032 | Actin, alpha cardiac muscle 1                                        | 0.24 | 0.142 | 6.0E-06 | 6  | 21.0 |
| P02649 | Apolipoprotein E                                                     | 0.24 | 0.064 | 3.3E-11 | 15 | 45.1 |
| P09936 | Ubiquitin carboxyl-terminal hydrolase isozyme L1                     | 0.24 | 0.296 | 3.8E-02 | 4  | 21.5 |
| P98160 | Basement membrane-specific heparan sulfate proteoglycan core protein | 0.23 | 0.068 | 2.4E-15 | 27 | 7.6  |
| P02686 | Myelin basic protein                                                 | 0.23 | 0.087 | 9.0E-07 | 3  | 11.2 |
| Q15230 | Laminin subunit alpha-5                                              | 0.23 | 0.126 | 1.8E-03 | 10 | 3.8  |
| P02671 | Fibrinogen alpha chain                                               | 0.22 | 0.076 | 1.6E-08 | 9  | 13.0 |
| P01871 | Ig mu chain C region                                                 | 0.21 | 0.135 | 1.0E-04 | 7  | 19.5 |
| P11277 | Spectrin beta chain, erythrocytic                                    | 0.21 | 0.198 | 1.8E-02 | 9  | 5.6  |
| P21926 | CD9 antigen                                                          | 0.21 | 0.135 | 9.4E-03 | 3  | 9.6  |
| P04083 | Annexin A1                                                           | 0.21 | 0.079 | 2.8E-11 | 11 | 39.0 |
| P01008 | Antithrombin-III                                                     | 0.21 | 0.142 | 1.5E-04 | 5  | 12.1 |
| P11047 | Laminin subunit gamma-1                                              | 0.21 | 0.123 | 1.6E-07 | 13 | 8.3  |
| Q14195 | Dihydropyrimidinase-related protein 3                                | 0.19 | 0.109 | 3.2E-08 | 9  | 21.6 |
| Q14699 | Raftlin                                                              | 0.19 | 0.169 | 3.8E-02 | 3  | 4.0  |
| P39060 | Collagen alpha-1(XVIII) chain                                        | 0.18 | 0.103 | 7.8E-09 | 7  | 4.1  |
| P05186 | Alkaline phosphatase, tissue-nonspecific isozyme                     | 0.18 | 0.165 | 1.8E-02 | 4  | 8.2  |
| P04275 | von Willebrand factor                                                | 0.18 | 0.087 | 2.4E-10 | 10 | 4.0  |
| P10745 | Retinol-binding protein 3                                            | 0.17 | 0.108 | 1.5E-05 | 5  | 5.0  |
| P20774 | Mimectan                                                             | 0.17 | 0.092 | 1.4E-09 | 8  | 22.5 |
| Q9BXM0 | Periaxin                                                             | 0.16 | 0.173 | 1.8E-05 | 7  | 3.5  |
| P14543 | Nidogen-1                                                            | 0.16 | 0.097 | 6.8E-08 | 8  | 7.0  |
| P02730 | Band 3 anion transport protein                                       | 0.16 | 0.128 | 4.1E-04 | 6  | 8.2  |
| P35749 | Myosin-11                                                            | 0.16 | 0.068 | 1.6E-13 | 27 | 16.0 |
| P21980 | Protein-glutamine gamma-glutamyltransferase 2                        | 0.16 | 0.083 | 0.0E+00 | 15 | 21.4 |
| P22748 | Carbonic anhydrase 4                                                 | 0.15 | 0.098 | 4.3E-07 | 8  | 26.9 |
| P35555 | Fibrillin-1                                                          | 0.15 | 0.042 | 0.0E+00 | 38 | 14.6 |
| P35625 | Metalloproteinase inhibitor 3                                        | 0.15 | 0.118 | 1.0E-07 | 5  | 24.6 |
| P41219 | Peripherin                                                           | 0.15 | 0.105 | 7.9E-11 | 13 | 30.9 |
| P01031 | Complement C5                                                        | 0.14 | 0.133 | 1.9E-05 | 5  | 3.0  |
| P07585 | Decorin                                                              | 0.14 | 0.099 | 7.6E-05 | 6  | 16.7 |
| Q15661 | Trypsin alpha/beta-1                                                 | 0.14 | 0.087 | 2.2E-11 | 5  | 21.8 |
| P10909 | Clusterin                                                            | 0.14 | 0.062 | 0.0E+00 | 14 | 27.4 |
| P51888 | Prolargin                                                            | 0.14 | 0.054 | 0.0E+00 | 12 | 34.0 |
| P51884 | Lumican                                                              | 0.14 | 0.052 | 0.0E+00 | 9  | 26.0 |
| P21810 | Biglycan                                                             | 0.13 | 0.094 | 1.2E-11 | 8  | 23.9 |
| P15088 | Mast cell carboxypeptidase A                                         | 0.13 | 0.198 | 2.1E-03 | 3  | 6.0  |
| P04004 | Vitronectin                                                          | 0.13 | 0.071 | 0.0E+00 | 11 | 20.3 |
| P02743 | Serum amyloid P-component                                            | 0.12 | 0.100 | 1.3E-05 | 6  | 23.3 |
| P02748 | Complement component C9                                              | 0.12 | 0.084 | 6.6E-08 | 8  | 15.2 |
| P25189 | Myelin protein P0                                                    | 0.10 | 0.092 | 6.5E-09 | 6  | 24.2 |

Brown denotes change  $\geq 2$  standard deviations (SD) from the mean, yellow denotes change  $\geq 1$  SD and green highlights p values  $\leq 0.05$ . NA, not applicable, n<3 unique peptides.
