# Supplementary material for: iTRAQ Quantitative Proteomic Comparison of Metastatic and Non-Metastatic Uveal Melanoma Tumors
Source: PubMed Central journal article supplement (PMC4549237; doi:10.1371/journal.pone.0135543), 2015-08-25
Supplement: pone.0135543.s010.pdf [file pone.0135543.s010.pdf]

## Supplementary Table S10

## Relative Protein Abundance: Sample UM26, Non-Metastatic

Total Proteins Quantified = 797; LogMedian Protein Ratio = 0.15; LogMean Protein Ratio = 0; Standard Deviation = 0.84

| Uni-Prot Accession | Protein                                                     | Ratio UM/Control | Standard Deviation | p value | Unique Peptides | % Sequence Coverage |
|--------------------|-------------------------------------------------------------|------------------|--------------------|---------|-----------------|---------------------|
| Q9UBR2             | Cathepsin Z                                                 | 7.84             | 0.169              | 4.6E-06 | 4               | 10.6                |
| Q13510             | Acid ceramidase                                             | 7.56             | 0.103              | 1.1E-13 | 10              | 18.2                |
| Q9H3G5             | Probable serine carboxypeptidase CPVL                       | 7.17             | 0.101              | 1.2E-09 | 6               | 11.8                |
| P30086             | Phosphatidylethanolamine-binding protein 1                  | 6.95             | 0.126              | 1.4E-09 | 10              | 58.8                |
| P40121             | Macrophage-capping protein                                  | 6.78             | 0.197              | 9.1E-07 | 5               | 15.5                |
| Q8IV08             | Phospholipase D3                                            | 6.68             | 0.124              | 2.2E-09 | 5               | 10.0                |
| P09211             | Glutathione S-transferase P                                 | 5.76             | 0.095              | 5.1E-09 | 6               | 39.0                |
| P07108             | Acyl-CoA-binding protein                                    | 5.48             | 0.265              | 7.0E-04 | 3               | 52.9                |
| P63241             | Eukaryotic translation initiation factor 5A-1               | 5.47             | 0.194              | 4.7E-04 | 5               | 27.9                |
| P62937             | Peptidyl-prolyl cis-trans isomerase A                       | 5.36             | 0.090              | 0.0E+00 | 6               | 29.7                |
| P07195             | L-lactate dehydrogenase B chain                             | 5.10             | 0.111              | 1.3E-12 | 10              | 29.3                |
| P40925             | Malate dehydrogenase, cytoplasmic                           | 5.09             | 0.208              | 1.6E-05 | 5               | 17.4                |
| P60174             | Triosephosphate isomerase                                   | 4.78             | 0.143              | 1.4E-04 | 11              | 42.7                |
| P78417             | Glutathione S-transferase omega-1                           | 4.33             | 0.104              | 2.8E-06 | 7               | 26.6                |
| P04080             | Cystatin-B                                                  | 4.09             | 0.138              | 4.1E-06 | 5               | 57.1                |
| P07339             | Cathepsin D                                                 | 4.08             | 0.091              | 1.2E-10 | 7               | 18.0                |
| P06733             | Alpha-enolase                                               | 3.83             | 0.067              | 8.5E-12 | 11              | 28.3                |
| P15121             | Aldose reductase                                            | 3.66             | 0.121              | 2.4E-05 | 5               | 16.5                |
| P04406             | Glyceraldehyde-3-phosphate dehydrogenase                    | 3.65             | 0.065              | 3.3E-15 | 9               | 28.1                |
| P31939             | Bifunctional purine biosynthesis protein PURH               | 3.59             | 0.118              | 7.5E-03 | 3               | 5.2                 |
| Q9HC38             | Glyoxalase domain-containing protein 4                      | 3.55             | 0.174              | 3.6E-03 | 4               | 13.1                |
| P06865             | Beta-hexosaminidase subunit alpha                           | 3.54             | 0.135              | 2.0E-04 | 6               | 9.6                 |
| P07858             | Cathepsin B                                                 | 3.53             | 0.133              | 4.2E-08 | 7               | 22.1                |
| P08758             | Annexin A5                                                  | 3.51             | 0.042              | 0.0E+00 | 18              | 59.7                |
| Q9UHL4             | Dipeptidyl peptidase 2                                      | 3.51             | 0.336              | 1.1E-02 | 6               | 15.0                |
| P61916             | Epididymal secretory protein E1                             | 3.39             | 0.149              | 2.3E-02 | 4               | 23.2                |
| P07686             | Beta-hexosaminidase subunit beta                            | 3.34             | 0.247              | 1.1E-03 | 10              | 16.5                |
| P23528             | Cofilin-1                                                   | 3.32             | 0.153              | 4.8E-04 | 7               | 37.3                |
| Q16658             | Fascin                                                      | 3.30             | 0.214              | 5.7E-03 | 4               | 10.1                |
| P52565             | Rho GDP-dissociation inhibitor 1                            | 3.28             | 0.131              | 8.9E-06 | 4               | 22.5                |
| P06737             | Glycogen phosphorylase, liver form                          | 3.28             | 0.088              | 1.1E-14 | 20              | 24.3                |
| P02768             | Serum albumin                                               | 3.26             | 0.026              | 0.0E+00 | 36              | 54.2                |
| P27816             | Microtubule-associated protein 4                            | 3.19             | 0.205              | 4.2E-04 | 8               | 10.2                |
| O75368             | SH3 domain-binding glutamic acid-rich-like protein          | 3.16             | 0.142              | 3.5E-03 | 3               | 34.2                |
| P08195             | 4F2 cell-surface antigen heavy chain                        | 3.13             | 0.084              | 3.2E-09 | 10              | 17.5                |
| P51858             | Hepatoma-derived growth factor                              | 3.08             | 0.182              | 4.3E-03 | 4               | 19.2                |
| Q01105             | Protein SET                                                 | 3.01             | 0.142              | 1.0E-04 | 5               | 20.0                |
| P10253             | Lysosomal alpha-glucosidase                                 | 2.96             | 0.214              | 9.6E-03 | 3               | 3.3                 |
| P07900             | Heat shock protein HSP 90-alpha                             | 2.95             | 0.085              | 8.4E-12 | 15              | 17.6                |
| P29401             | Transketolase                                               | 2.93             | 0.148              | 1.7E-04 | 9               | 14.1                |
| P00338             | L-lactate dehydrogenase A chain                             | 2.92             | 0.122              | 7.8E-06 | 6               | 15.1                |
| P00558             | Phosphoglycerate kinase 1                                   | 2.92             | 0.109              | 2.4E-07 | 11              | 21.1                |
| P07602             | Prosaposin                                                  | 2.90             | 0.097              | 1.7E-04 | 6               | 9.4                 |
| P46926             | Glucosamine-6-phosphate isomerase 1                         | 2.87             | 0.222              | 2.3E-03 | 4               | 12.5                |
| P57729             | Ras-related protein Rab-38                                  | 2.87             | 0.141              | 1.2E-03 | 3               | 11.8                |
| P19338             | Nucleolin                                                   | 2.86             | 0.101              | 5.4E-09 | 12              | 14.6                |
| P06748             | Nucleophosmin                                               | 2.81             | 0.109              | 1.5E-05 | 7               | 19.7                |
| P27348             | 14-3-3 protein theta                                        | 2.81             | 0.044              | 5.8E-05 | 4               | 21.6                |
| P06744             | Glucose-6-phosphate isomerase                               | 2.80             | 0.162              | 3.0E-05 | 9               | 16.1                |
| P63104             | 14-3-3 protein zeta/delta                                   | 2.73             | 0.089              | 7.8E-05 | 6               | 29.8                |
| Q00796             | Sorbitol dehydrogenase                                      | 2.70             | 0.088              | 3.8E-04 | 5               | 12.0                |
| P62158             | Calmodulin                                                  | 2.67             | 0.118              | 5.2E-05 | 4               | 29.5                |
| P24941             | Cyclin-dependent kinase 2                                   | 2.64             | 0.284              | 1.2E-02 | 4               | 13.4                |
| P51149             | Ras-related protein Rab-7a                                  | 2.62             | 0.067              | 1.9E-09 | 8               | 42.5                |
| P02787             | Serotransferrin                                             | 2.60             | 0.089              | 1.2E-09 | 17              | 24.1                |
| P15531             | Nucleoside diphosphate kinase A                             | 2.57             | 0.234              | 1.6E-02 | 3               | 22.4                |
| Q99536             | Synaptic vesicle membrane protein VAT-1 homolog             | 2.50             | 0.090              | 2.0E-05 | 11              | 33.3                |
| P10599             | Thioredoxin                                                 | 2.50             | 0.096              | 1.2E-02 | 3               | 32.4                |
| P23526             | Adenosylhomocysteinase                                      | 2.48             | 0.133              | 1.3E-04 | 9               | 24.5                |
| P14618             | Pyruvate kinase PKM                                         | 2.46             | 0.052              | 4.2E-15 | 11              | 23.2                |
| P07737             | Profilin-1                                                  | 2.45             | 0.106              | 1.6E-06 | 5               | 34.3                |
| P13798             | Acylamino-acid-releasing enzyme                             | 2.44             | 0.124              | 3.9E-03 | 3               | 4.1                 |
| O14818             | Proteasome subunit alpha type-7                             | 2.43             | 0.175              | 1.5E-02 | 3               | 11.7                |
| P25786             | Proteasome subunit alpha type-1                             | 2.39             | 0.211              | 1.5E-02 | 4               | 15.6                |
| P38606             | V-type proton ATPase catalytic subunit A                    | 2.37             | 0.068              | 5.8E-04 | 7               | 11.8                |
| P16070             | CD44 antigen                                                | 2.36             | 0.135              | 6.0E-03 | 9               | 12.1                |
| P62258             | 14-3-3 protein epsilon                                      | 2.36             | 0.170              | 5.8E-04 | 9               | 26.7                |
| Q9Y2J2             | Band 4.1-like protein 3                                     | 2.34             | 0.165              | 1.0E-02 | 6               | 8.8                 |
| P10619             | Lysosomal protective protein                                | 2.33             | 0.096              | 2.4E-04 | 4               | 8.3                 |
| P06454             | Prothymosin alpha                                           | 5.53             | NA                 | NA      | 2               | 12.6                |
| P61088             | Ubiquitin-conjugating enzyme E2 N                           | 5.32             | NA                 | NA      | 2               | 13.8                |
| Q8WWM9             | Cytoglobin                                                  | 5.02             | NA                 | NA      | 2               | 8.4                 |
| P05413             | Fatty acid-binding protein, heart                           | 4.91             | NA                 | NA      | 2               | 15.8                |
| O14556             | Glyceraldehyde-3-phosphate dehydrogenase, testis-specific   | 4.81             | NA                 | NA      | 2               | 5.4                 |
| Q99572             | P2X purinoceptor 7                                          | 3.85             | NA                 | NA      | 2               | 4.2                 |
| O75347             | Tubulin-specific chaperone A                                | 3.73             | NA                 | NA      | 2               | 16.7                |
| P43235             | Cathepsin K                                                 | 3.70             | NA                 | NA      | 2               | 4.6                 |
| P17096             | High mobility group protein HMG-I/HMG-Y                     | 3.62             | NA                 | NA      | 2               | 23.4                |
| Q04760             | Lactoylglutathione lyase                                    | 3.61             | NA                 | NA      | 2               | 10.3                |
| O00584             | Ribonuclease T2                                             | 3.40             | NA                 | NA      | 2               | 6.6                 |
| P07741             | Adenine phosphoribosyltransferase                           | 3.24             | NA                 | NA      | 2               | 12.8                |
| P30043             | Flavin reductase (NADPH)                                    | 3.11             | NA                 | NA      | 2               | 11.7                |
| P62826             | GTP-binding nuclear protein Ran                             | 3.09             | NA                 | NA      | 2               | 9.7                 |
| P13686             | Tartrate-resistant acid phosphatase type 5                  | 2.97             | NA                 | NA      | 2               | 5.8                 |
| P17900             | Ganglioside GM2 activator                                   | 2.93             | 0.369              | 7.5E-02 | 3               | 13.0                |
| P58546             | Myotrophin                                                  | 2.91             | NA                 | NA      | 2               | 25.4                |
| Q9UHB6             | LIM domain and actin-binding protein 1                      | 2.87             | NA                 | NA      | 2               | 4.0                 |
| P20039             | HLA class II histocompatibility antigen, DRB1-11 beta chain | 2.76             | NA                 | NA      | 2               | 9.8                 |
| Q15819             | Ubiquitin-conjugating enzyme E2 variant 2                   | 2.74             | NA                 | NA      | 2               | 13.1                |
| P21283             | V-type proton ATPase subunit C 1                            | 2.73             | NA                 | NA      | 2               | 4.2                 |
| P11766             | Alcohol dehydrogenase class-3                               | 2.68             | NA                 | NA      | 2               | 5.1                 |
| P09429             | High mobility group protein B1                              | 2.45             | 0.137              | 1.1E-01 | 4               | 21.9                |
| Q96A05             | V-type proton ATPase subunit E 2                            | 2.37             | NA                 | NA      | 2               | 7.1                 |
| O15400             | Syntaxin-7                                                  | 2.36             | NA                 | NA      | 2               | 10.7                |
| Q9Y2S2             | Lambda-crystallin homolog                                   | 2.32             | NA                 | NA      | 2               | 6.3                 |
| P13639             | Elongation factor 2                                         | 2.30             | 0.121              | 6.7E-05 | 8               | 10.4                |
| P22087             | rRNA 2'-O-methyltransferase fibrillar                       | 2.29             | NA                 | NA      | 2               | 7.5                 |
| P12955             | Xaa-Pro dipeptidase                                         | 2.29             | 0.209              | 1.8E-02 | 3               | 5.7                 |
| O75083             | WD repeat-containing protein 1                              | 2.26             | 0.104              | 3.3E-06 | 7               | 11.2                |
| P23246             | Splicing factor, proline- and glutamine-rich                | 2.26             | 0.250              | 1.0E-02 | 5               | 8.6                 |

Table S10-Sample UM26

|        |                                                                          |      |       |         |    |      |
|--------|--------------------------------------------------------------------------|------|-------|---------|----|------|
| Q15631 | Translin                                                                 | 2.25 | NA    | NA      | 2  | 11.4 |
| Q12906 | Interleukin enhancer-binding factor 3                                    | 2.23 | 0.118 | 9.8E-04 | 11 | 14.5 |
| Q13185 | Chromobox protein homolog 3                                              | 2.23 | 0.086 | 1.8E-06 | 3  | 18.0 |
| Q99497 | Protein DJ-1                                                             | 2.21 | 0.176 | 1.9E-02 | 5  | 28.0 |
| O75874 | Isocitrate dehydrogenase [NADP] cytoplasmic                              | 2.21 | 0.230 | 1.2E-01 | 3  | 8.0  |
| P08670 | Vimentin                                                                 | 2.17 | 0.037 | 0.0E+00 | 30 | 60.1 |
| P08238 | Heat shock protein HSP 90-beta                                           | 2.14 | 0.107 | 4.1E-05 | 7  | 9.3  |
| P09382 | Galectin-1                                                               | 2.14 | 0.058 | 7.4E-09 | 6  | 46.7 |
| O43399 | Tumor protein D54                                                        | 2.11 | NA    | NA      | 2  | 11.7 |
| P16152 | Carbonyl reductase [NADPH] 1                                             | 2.10 | 0.070 | 1.4E-02 | 3  | 13.4 |
| O00483 | NADH dehydrogenase [ubiquinone] 1 alpha subcomplex subunit 4             | 2.10 | 0.185 | 1.0E-02 | 3  | 32.1 |
| P06753 | Tropomyosin alpha-3 chain                                                | 2.09 | 0.089 | 1.4E-05 | 4  | 13.0 |
| P09936 | Ubiquitin carboxyl-terminal hydrolase isozyme L1                         | 2.08 | 0.089 | 3.3E-06 | 4  | 25.1 |
| P13489 | Ribonuclease inhibitor                                                   | 2.06 | 0.182 | 5.3E-03 | 5  | 12.6 |
| P40926 | Malate dehydrogenase, mitochondrial                                      | 2.06 | 0.066 | 1.1E-09 | 8  | 26.0 |
| P31948 | Stress-induced-phosphoprotein 1                                          | 2.06 | 0.117 | 3.6E-04 | 8  | 13.1 |
| P60842 | Eukaryotic initiation factor 4A-I                                        | 2.06 | 0.115 | 1.5E-03 | 4  | 12.3 |
| Q07955 | Serine/arginine-rich splicing factor 1                                   | 2.06 | 0.063 | 4.7E-05 | 5  | 17.3 |
| P07910 | Heterogeneous nuclear ribonucleoproteins C1/C2                           | 2.05 | 0.061 | 6.8E-09 | 9  | 27.1 |
| Q12905 | Interleukin enhancer-binding factor 2                                    | 2.05 | 0.037 | 3.1E-05 | 3  | 9.5  |
| O14773 | Tripeptidyl-peptidase 1                                                  | 2.04 | 0.102 | 3.6E-05 | 3  | 6.2  |
| P46940 | Ras GTPase-activating-like protein IQGAP1                                | 2.03 | 0.042 | 7.3E-12 | 14 | 9.4  |
| Q13838 | Spliceosome RNA helicase DDX39B                                          | 2.03 | 0.136 | 3.6E-03 | 4  | 9.8  |
| P39687 | Acidic leucine-rich nuclear phosphoprotein 32 family member A            | 2.03 | 0.208 | 2.6E-02 | 4  | 10.0 |
| P55786 | Puromycin-sensitive aminopeptidase                                       | 2.03 | 0.108 | 7.4E-04 | 4  | 4.9  |
| Q13177 | Serine/threonine-protein kinase PAK 2                                    | 2.02 | NA    | NA      | 2  | 5.9  |
| Q9UH65 | Switch-associated protein 70                                             | 2.01 | 0.061 | 6.1E-05 | 4  | 4.8  |
| Q5VTE0 | Putative elongation factor 1-alpha-like 3                                | 2.00 | 0.059 | 8.9E-08 | 9  | 17.1 |
| P20618 | Proteasome subunit beta type-1                                           | 2.00 | 0.111 | 1.0E-03 | 3  | 13.3 |
| Q07960 | Rho GTPase-activating protein 1                                          | 2.00 | NA    | NA      | 2  | 5.0  |
| P15586 | N-acetylglucosamine-6-sulfatase                                          | 1.99 | 0.209 | 6.1E-02 | 3  | 4.7  |
| P21796 | Voltage-dependent anion-selective channel protein 1                      | 1.97 | 0.082 | 8.8E-06 | 6  | 19.8 |
| P54652 | Heat shock-related 70 kDa protein 2                                      | 1.97 | 0.093 | 3.1E-06 | 10 | 15.6 |
| P99999 | Cytochrome c                                                             | 1.96 | 0.193 | 8.6E-03 | 3  | 24.8 |
| Q14103 | Heterogeneous nuclear ribonucleoprotein D0                               | 1.95 | NA    | NA      | 2  | 6.8  |
| P09651 | Heterogeneous nuclear ribonucleoprotein A1                               | 1.95 | 0.062 | 3.0E-06 | 8  | 23.9 |
| Q92945 | Far upstream element-binding protein 2                                   | 1.95 | 0.119 | 7.9E-04 | 4  | 6.2  |
| P30044 | Peroxisiredoxin-5, mitochondrial                                         | 1.94 | 0.072 | 3.4E-04 | 3  | 15.4 |
| Q14247 | Src substrate cortactin                                                  | 1.92 | 0.709 | 1.6E-01 | 4  | 8.9  |
| P53999 | Activated RNA polymerase II transcriptional coactivator p15              | 1.90 | NA    | NA      | 2  | 15.7 |
| Q04917 | 14-3-3 protein eta                                                       | 1.89 | NA    | NA      | 2  | 9.8  |
| Q13126 | S-methyl-5'-thioadenosine phosphorylase                                  | 1.89 | NA    | NA      | 2  | 7.4  |
| O00567 | Nucleolar protein 56                                                     | 1.88 | NA    | NA      | 2  | 2.9  |
| P40967 | Melanocyte protein PMEL                                                  | 1.87 | NA    | NA      | 2  | 3.3  |
| Q96FW1 | Ubiquitin thioesterase OTUB1                                             | 1.86 | NA    | NA      | 2  | 10.3 |
| Q9Y3C8 | Ubiquitin-fold modifier-conjugating enzyme 1                             | 1.86 | NA    | NA      | 2  | 11.4 |
| P61604 | 10 kDa heat shock protein, mitochondrial                                 | 1.84 | 0.081 | 1.1E-02 | 4  | 35.3 |
| Q13619 | Cullin-4A                                                                | 1.84 | NA    | NA      | 2  | 2.2  |
| Q08380 | Galectin-3-binding protein                                               | 1.84 | 0.208 | 3.9E-02 | 4  | 8.5  |
| O95834 | Echinoderm microtubule-associated protein-like 2                         | 1.81 | NA    | NA      | 2  | 4.0  |
| Q16666 | Gamma-interferon-inducible protein 16                                    | 1.81 | NA    | NA      | 2  | 2.5  |
| Q01130 | Serine/arginine-rich splicing factor 2                                   | 1.81 | 0.106 | 1.2E-01 | 3  | 14.5 |
| Q14683 | Structural maintenance of chromosomes protein 1A                         | 1.80 | NA    | NA      | 2  | 1.7  |
| P18669 | Phosphoglycerate mutase 1                                                | 1.80 | 0.081 | 2.2E-05 | 3  | 21.7 |
| P51159 | Ras-related protein Rab-27A                                              | 1.78 | NA    | NA      | 2  | 10.9 |
| P16401 | Histone H1.5                                                             | 1.78 | 0.170 | 8.7E-03 | 3  | 9.7  |
| P07203 | Glutathione peroxidase 1                                                 | 1.78 | 0.242 | 1.5E-01 | 3  | 10.3 |
| P25398 | 40S ribosomal protein S12                                                | 1.78 | NA    | NA      | 2  | 13.6 |
| B5ME19 | Eukaryotic translation initiation factor 3 subunit C-like protein        | 1.76 | 0.315 | 2.0E-01 | 3  | 3.2  |
| Q96KP4 | Cytosolic non-specific dipeptidase                                       | 1.75 | 0.132 | 4.4E-03 | 5  | 13.9 |
| Q9UKM9 | RNA-binding protein Raly                                                 | 1.75 | 0.117 | 3.3E-03 | 4  | 17.0 |
| P20702 | Integrin alpha-X                                                         | 1.74 | 0.128 | 2.1E-02 | 4  | 3.4  |
| P10155 | 60 kDa SS-A/Ro ribonucleoprotein                                         | 1.73 | NA    | NA      | 2  | 4.5  |
| P17931 | Galectin-3                                                               | 1.72 | 0.113 | 2.6E-04 | 6  | 28.4 |
| Q14956 | Transmembrane glycoprotein NMB                                           | 1.72 | 0.185 | 5.1E-02 | 5  | 10.0 |
| Q92688 | Acidic leucine-rich nuclear phosphoprotein 32 family member B            | 1.72 | 0.289 | 9.4E-02 | 5  | 14.3 |
| Q15365 | Poly(rC)-binding protein 1                                               | 1.72 | 0.331 | 1.3E-01 | 3  | 10.1 |
| P37840 | Alpha-synuclein                                                          | 1.72 | NA    | NA      | 2  | 17.1 |
| Q99523 | Sortilin                                                                 | 1.71 | NA    | NA      | 2  | 2.4  |
| P13693 | Translationally-controlled tumor protein                                 | 1.70 | NA    | NA      | 2  | 15.7 |
| P20042 | Eukaryotic translation initiation factor 2 subunit 2                     | 1.70 | 0.427 | 6.4E-01 | 3  | 11.4 |
| P28066 | Proteasome subunit alpha type-5                                          | 1.70 | NA    | NA      | 2  | 12.9 |
| P17643 | 5,6-dihydroxyindole-2-carboxylic acid oxidase                            | 1.70 | 0.124 | 3.4E-03 | 6  | 13.0 |
| O43681 | ATPase ANA1                                                              | 1.70 | NA    | NA      | 2  | 5.5  |
| P55809 | Succinyl-CoA:3-ketoacid coenzyme A transferase 1, mitochondrial          | 1.69 | NA    | NA      | 2  | 3.5  |
| Q15691 | Microtubule-associated protein RP/EB family member 1                     | 1.69 | 0.095 | 1.8E-02 | 4  | 8.6  |
| P78347 | General transcription factor II-I                                        | 1.69 | 0.423 | 1.9E-01 | 3  | 2.9  |
| P31040 | Succinate dehydrogenase [ubiquinone] flavoprotein subunit, mitochondrial | 1.67 | 0.136 | 4.3E-03 | 5  | 10.7 |
| P61353 | 60S ribosomal protein L27                                                | 1.67 | 0.082 | 1.2E-02 | 3  | 25.7 |
| P62263 | 40S ribosomal protein S14                                                | 1.67 | 0.198 | 1.4E-01 | 4  | 36.4 |
| P02786 | Transferrin receptor protein 1                                           | 1.66 | NA    | NA      | 2  | 3.2  |
| P61981 | 14-3-3 protein gamma                                                     | 1.66 | 0.145 | 1.9E-02 | 3  | 13.8 |
| O75380 | NADH dehydrogenase [ubiquinone] iron-sulfur protein 6, mitochondrial     | 1.65 | NA    | NA      | 2  | 20.2 |
| O95292 | Vesicle-associated membrane protein-associated protein B/C               | 1.65 | 0.156 | 1.7E-01 | 3  | 14.4 |
| P14854 | Cytochrome c oxidase subunit 6B1                                         | 1.65 | 0.031 | 1.5E-03 | 3  | 24.4 |
| P08865 | 40S ribosomal protein SA                                                 | 1.64 | 0.051 | 1.0E-05 | 5  | 19.7 |
| P30041 | Peroxisiredoxin-6                                                        | 1.64 | 0.071 | 8.4E-06 | 7  | 25.4 |
| Q15102 | Platelet-activating factor acetylhydrolase IB subunit gamma              | 1.64 | NA    | NA      | 2  | 9.1  |
| P02790 | Hemopexin                                                                | 1.64 | 0.058 | 5.3E-04 | 3  | 6.3  |
| P22314 | Ubiquitin-like modifier-activating enzyme 1                              | 1.64 | 0.163 | 1.6E-02 | 5  | 5.5  |
| P15311 | Ezrin                                                                    | 1.63 | NA    | NA      | 2  | 3.8  |
| P26599 | Polypyrimidine tract-binding protein 1                                   | 1.63 | 0.087 | 3.3E-04 | 5  | 7.7  |
| P30084 | Enoyl-CoA hydratase, mitochondrial                                       | 1.62 | 0.085 | 6.5E-02 | 3  | 12.8 |
| O14979 | Heterogeneous nuclear ribonucleoprotein D-like                           | 1.62 | 0.170 | 2.1E-02 | 3  | 4.5  |
| P20674 | Cytochrome c oxidase subunit 5A, mitochondrial                           | 1.62 | 0.262 | 9.0E-02 | 4  | 20.0 |
| Q15056 | Eukaryotic translation initiation factor 4H                              | 1.62 | NA    | NA      | 2  | 10.9 |
| P50395 | Rab GDP dissociation inhibitor beta                                      | 1.61 | 0.182 | 1.2E-01 | 4  | 10.8 |
| P42704 | Leucine-rich PPR motif-containing protein, mitochondrial                 | 1.61 | 0.098 | 1.1E-02 | 6  | 3.9  |
| P54819 | Adenylate kinase 2, mitochondrial                                        | 1.61 | NA    | NA      | 2  | 10.9 |
| P55084 | Trifunctional enzyme subunit beta, mitochondrial                         | 1.60 | 0.037 | 7.3E-11 | 12 | 21.1 |
| P62906 | 60S ribosomal protein L10a                                               | 1.60 | 0.086 | 9.6E-04 | 5  | 27.2 |
| P62820 | Ras-related protein Rab-1A                                               | 1.60 | NA    | NA      | 2  | 8.3  |
| Q99798 | Aconitate hydratase, mitochondrial                                       | 1.59 | 0.106 | 1.3E-04 | 9  | 15.0 |
| P02765 | Alpha-2-HS-glycoprotein                                                  | 1.59 | NA    | NA      | 2  | 3.5  |
| Q13576 | Ras GTPase-activating-like protein IQGAP2                                | 1.58 | 0.244 | 1.4E-01 | 5  | 3.3  |
| P46439 | Glutathione S-transferase Mu 5                                           | 1.58 | NA    | NA      | 2  | 6.9  |
| P31949 | Protein S100-A11                                                         | 1.57 | 0.267 | 1.5E-01 | 3  | 27.6 |

Table S10-Sample UM26

|        |                                                                             |      |       |         |    |      |
|--------|-----------------------------------------------------------------------------|------|-------|---------|----|------|
| P22626 | Heterogeneous nuclear ribonucleoproteins A2/B1                              | 1.57 | 0.048 | 1.9E-08 | 14 | 35.4 |
| Q01469 | Fatty acid-binding protein, epidermal                                       | 1.57 | NA    | NA      | 2  | 11.9 |
| Q9H2U2 | Inorganic pyrophosphatase 2, mitochondrial                                  | 1.56 | NA    | NA      | 2  | 6.3  |
| P05198 | Eukaryotic translation initiation factor 2 subunit 1                        | 1.56 | NA    | NA      | 2  | 7.0  |
| P05107 | Integrin beta-2                                                             | 1.56 | 0.078 | 1.6E-03 | 5  | 7.5  |
| P60981 | Destrin                                                                     | 1.56 | 0.129 | 4.7E-02 | 3  | 18.2 |
| P61158 | Actin-related protein 3                                                     | 1.56 | 0.091 | 7.4E-03 | 6  | 17.2 |
| P12956 | X-ray repair cross-complementing protein 6                                  | 1.56 | 0.099 | 2.6E-04 | 11 | 19.9 |
| P37802 | Transgelin-2                                                                | 1.56 | NA    | NA      | 2  | 10.1 |
| Q13011 | Delta(3,5)-Delta(2,4)-dienoyl-CoA isomerase, mitochondrial                  | 1.55 | 0.096 | 5.9E-02 | 4  | 12.5 |
| Q09028 | Histone-binding protein RBBP4                                               | 1.55 | NA    | NA      | 2  | 3.5  |
| P01903 | HLA class II histocompatibility antigen, DR alpha chain                     | 1.55 | 0.090 | 1.0E-03 | 4  | 21.3 |
| P13010 | X-ray repair cross-complementing protein 5                                  | 1.54 | 0.123 | 4.2E-03 | 10 | 13.8 |
| P52815 | 39S ribosomal protein L12, mitochondrial                                    | 1.54 | NA    | NA      | 2  | 11.6 |
| P37837 | Transaldolase                                                               | 1.54 | 0.116 | 4.7E-02 | 5  | 11.9 |
| P02766 | Transthyretin                                                               | 1.54 | NA    | NA      | 2  | 12.9 |
| P14868 | Aspartate--tRNA ligase, cytoplasmic                                         | 1.53 | 0.334 | 2.0E-01 | 3  | 7.6  |
| Q14974 | Importin subunit beta-1                                                     | 1.53 | 0.960 | 4.0E-01 | 3  | 5.4  |
| P34932 | Heat shock 70 kDa protein 4                                                 | 1.53 | 0.049 | 2.8E-05 | 8  | 10.7 |
| P46777 | 60S ribosomal protein L5                                                    | 1.53 | 0.087 | 4.1E-04 | 4  | 14.5 |
| P62277 | 40S ribosomal protein S13                                                   | 1.52 | 0.394 | 3.7E-02 | 7  | 37.1 |
| P09012 | U1 small nuclear ribonucleoprotein A                                        | 1.52 | NA    | NA      | 2  | 6.4  |
| Q15084 | Protein disulfide-isomerase A6                                              | 1.52 | 0.064 | 5.0E-05 | 5  | 14.3 |
| P55008 | Allograft inflammatory factor 1                                             | 1.51 | NA    | NA      | 2  | 11.6 |
| Q13435 | Splicing factor 3B subunit 2                                                | 1.51 | NA    | NA      | 2  | 3.4  |
| Q16531 | DNA damage-binding protein 1                                                | 1.51 | 0.047 | 6.2E-03 | 3  | 2.4  |
| P63244 | Guanine nucleotide-binding protein subunit beta-2-like 1                    | 1.50 | NA    | NA      | 2  | 7.3  |
| P26641 | Elongation factor 1-gamma                                                   | 1.49 | 0.129 | 1.1E-02 | 4  | 8.9  |
| P09669 | Cytochrome c oxidase subunit 6C                                             | 1.49 | 0.110 | 9.4E-02 | 4  | 33.3 |
| P30405 | Peptidyl-prolyl cis-trans isomerase F, mitochondrial                        | 1.48 | NA    | NA      | 2  | 7.2  |
| O95336 | 6-phosphogluconolactonase                                                   | 1.48 | 0.314 | 3.8E-01 | 4  | 20.9 |
| P61978 | Heterogeneous nuclear ribonucleoprotein K                                   | 1.48 | 0.069 | 7.3E-04 | 13 | 29.4 |
| Q06136 | 3-ketodihydroxyphosphingosine reductase                                     | 1.48 | NA    | NA      | 2  | 8.1  |
| P39019 | 40S ribosomal protein S19                                                   | 1.48 | 0.042 | 1.4E-05 | 4  | 24.1 |
| Q86UX7 | Fermitin family homolog 3                                                   | 1.48 | NA    | NA      | 2  | 3.9  |
| P51991 | Heterogeneous nuclear ribonucleoprotein A3                                  | 1.48 | 0.058 | 1.6E-05 | 6  | 17.7 |
| Q5JTV8 | Torsin-1A-interacting protein 1                                             | 1.48 | NA    | NA      | 2  | 4.3  |
| O94832 | Unconventional myosin-Id                                                    | 1.48 | 0.146 | 5.8E-03 | 8  | 8.4  |
| Q86TX2 | Acyl-coenzyme A thioesterase 1                                              | 1.48 | NA    | NA      | 2  | 5.2  |
| Q8NHP8 | Putative phospholipase B-like 2                                             | 1.47 | NA    | NA      | 2  | 2.4  |
| Q15717 | ELAV-like protein 1                                                         | 1.47 | NA    | NA      | 2  | 7.7  |
| Q99436 | Proteasome subunit beta type-7                                              | 1.47 | NA    | NA      | 2  | 7.2  |
| Q07666 | KH domain-containing, RNA-binding, signal transduction-associated protein 1 | 1.46 | 0.066 | 4.5E-03 | 4  | 7.9  |
| P78527 | DNA-dependent protein kinase catalytic subunit                              | 1.46 | 0.082 | 8.4E-05 | 13 | 3.1  |
| P02652 | Apolipoprotein A-II                                                         | 1.46 | 0.328 | 1.8E-01 | 3  | 19.0 |
| Q9NP81 | Serine--tRNA ligase, mitochondrial                                          | 1.46 | NA    | NA      | 2  | 6.9  |
| P51810 | G-protein coupled receptor 143                                              | 1.45 | NA    | NA      | 2  | 5.7  |
| O75489 | NADH dehydrogenase [ubiquinone] iron-sulfur protein 3, mitochondrial        | 1.45 | 0.077 | 8.7E-03 | 4  | 18.9 |
| P49591 | Serine--tRNA ligase, cytoplasmic                                            | 1.44 | NA    | NA      | 2  | 5.3  |
| P62249 | 40S ribosomal protein S16                                                   | 1.44 | NA    | NA      | 2  | 15.8 |
| Q08211 | ATP-dependent RNA helicase A                                                | 1.44 | 0.188 | 1.5E-02 | 7  | 6.8  |
| P00441 | Superoxide dismutase [Cu-Zn]                                                | 1.43 | NA    | NA      | 2  | 13.0 |
| P09622 | Dihydropyridyl dehydrogenase, mitochondrial                                 | 1.43 | 0.263 | 3.7E-02 | 6  | 12.8 |
| P49411 | Elongation factor Tu, mitochondrial                                         | 1.43 | 0.064 | 3.3E-05 | 11 | 26.3 |
| Q6UVK1 | Chondroitin sulfate proteoglycan 4                                          | 1.43 | 0.244 | 1.1E-01 | 5  | 3.1  |
| P21266 | Glutathione S-transferase Mu 3                                              | 1.43 | NA    | NA      | 2  | 9.3  |
| Q06323 | Proteasome activator complex subunit 1                                      | 1.43 | 0.145 | 6.3E-02 | 3  | 14.5 |
| P19404 | NADH dehydrogenase [ubiquinone] flavoprotein 2, mitochondrial               | 1.43 | NA    | NA      | 2  | 9.6  |
| O95747 | Serine/threonine-protein kinase OSR1                                        | 1.42 | NA    | NA      | 2  | 3.6  |
| P53634 | Dipeptidyl peptidase 1                                                      | 1.42 | NA    | NA      | 2  | 3.5  |
| P20340 | Ras-related protein Rab-6A                                                  | 1.42 | NA    | NA      | 2  | 11.1 |
| P52272 | Heterogeneous nuclear ribonucleoprotein M                                   | 1.42 | 0.114 | 8.8E-02 | 5  | 8.9  |
| Q02318 | Sterol 26-hydroxylase, mitochondrial                                        | 1.42 | 0.149 | 2.9E-01 | 3  | 7.5  |
| Q9UJU6 | Drebrin-like protein                                                        | 1.41 | NA    | NA      | 2  | 5.1  |
| P08237 | ATP-dependent 6-phosphofructokinase, muscle type                            | 1.41 | 0.074 | 1.2E-01 | 4  | 6.2  |
| P54727 | UV excision repair protein RAD23 homolog B                                  | 1.41 | 0.241 | 1.8E-01 | 3  | 5.4  |
| P26006 | Integrin alpha-3                                                            | 1.41 | NA    | NA      | 2  | 1.8  |
| Q13263 | Transcription intermediary factor 1-beta                                    | 1.40 | NA    | NA      | 2  | 3.7  |
| P02647 | Apolipoprotein A-I                                                          | 1.40 | 0.077 | 1.6E-03 | 9  | 30.7 |
| P23284 | Peptidyl-prolyl cis-trans isomerase B                                       | 1.40 | 0.053 | 2.0E-05 | 10 | 38.9 |
| P01859 | Ig gamma-2 chain C region                                                   | 1.39 | NA    | NA      | 2  | 6.7  |
| O15145 | Actin-related protein 2/3 complex subunit 3                                 | 1.39 | 0.094 | 1.8E-02 | 4  | 19.7 |
| O00560 | Syntenin-1                                                                  | 1.39 | 0.658 | 4.9E-01 | 3  | 9.1  |
| P26373 | 60S ribosomal protein L13                                                   | 1.39 | 0.071 | 1.5E-02 | 4  | 19.4 |
| P04075 | Fructose-bisphosphate aldolase A                                            | 1.39 | 0.095 | 2.6E-03 | 15 | 46.4 |
| Q9BXK5 | Bcl-2-like protein 13                                                       | 1.39 | NA    | NA      | 2  | 4.7  |
| P35232 | Prohibitin                                                                  | 1.38 | 0.057 | 5.3E-05 | 7  | 26.8 |
| Q1KMD3 | Heterogeneous nuclear ribonucleoprotein U-like protein 2                    | 1.38 | NA    | NA      | 2  | 3.1  |
| Q9ULV4 | Coronin-1C                                                                  | 1.38 | NA    | NA      | 2  | 5.3  |
| Q14697 | Neutral alpha-glucosidase AB                                                | 1.37 | 0.086 | 1.1E-03 | 12 | 11.9 |
| P50914 | 60S ribosomal protein L14                                                   | 1.37 | 0.035 | 3.2E-02 | 3  | 16.7 |
| P60866 | 40S ribosomal protein S20                                                   | 1.37 | 0.068 | 1.1E-02 | 3  | 26.9 |
| O15144 | Actin-related protein 2/3 complex subunit 2                                 | 1.37 | NA    | NA      | 2  | 6.0  |
| P05387 | 60S acidic ribosomal protein P2                                             | 1.37 | 0.126 | 8.3E-02 | 4  | 60.0 |
| Q9BR76 | Coronin-1B                                                                  | 1.36 | 0.156 | 1.6E-01 | 3  | 5.5  |
| Q13409 | Cytoplasmic dynein 1 intermediate chain 2                                   | 1.36 | NA    | NA      | 2  | 3.9  |
| Q96BM9 | ADP-ribosylation factor-like protein 8A                                     | 1.36 | NA    | NA      | 2  | 12.4 |
| P62829 | 60S ribosomal protein L23                                                   | 1.36 | NA    | NA      | 2  | 16.4 |
| Q15366 | Poly(rC)-binding protein 2                                                  | 1.36 | NA    | NA      | 2  | 10.1 |
| Q9Y6M9 | NADH dehydrogenase [ubiquinone] 1 beta subcomplex subunit 9                 | 1.36 | NA    | NA      | 2  | 15.6 |
| P21912 | Succinate dehydrogenase [ubiquinone] iron-sulfur subunit, mitochondrial     | 1.36 | 0.028 | 4.1E-06 | 5  | 17.5 |
| Q13242 | Serine/arginine-rich splicing factor 9                                      | 1.36 | NA    | NA      | 2  | 9.5  |
| P62424 | 60S ribosomal protein L7a                                                   | 1.36 | 0.081 | 2.9E-02 | 5  | 16.2 |
| P62913 | 60S ribosomal protein L11                                                   | 1.35 | NA    | NA      | 2  | 12.9 |
| Q96AG4 | Leucine-rich repeat-containing protein 59                                   | 1.35 | NA    | NA      | 2  | 6.2  |
| O60493 | Sorting nexin-3                                                             | 1.35 | NA    | NA      | 2  | 11.7 |
| P10809 | 60 kDa heat shock protein, mitochondrial                                    | 1.35 | 0.168 | 1.4E-02 | 10 | 21.6 |
| P62917 | 60S ribosomal protein L8                                                    | 1.35 | 0.310 | 1.1E-01 | 3  | 13.2 |
| P29966 | Myristoylated alanine-rich C-kinase substrate                               | 1.35 | 0.480 | 3.4E-01 | 5  | 25.3 |
| P04792 | Heat shock protein beta-1                                                   | 1.34 | 0.131 | 9.6E-03 | 8  | 40.5 |
| Q00839 | Heterogeneous nuclear ribonucleoprotein U                                   | 1.34 | 0.124 | 2.8E-02 | 7  | 8.8  |
| P17844 | Probable ATP-dependent RNA helicase DDX5                                    | 1.34 | 0.145 | 1.1E-01 | 3  | 5.0  |
| P13674 | Prolyl 4-hydroxylase subunit alpha-1                                        | 1.34 | NA    | NA      | 2  | 5.1  |
| P62979 | Ubiquitin-40S ribosomal protein S27a                                        | 1.33 | 0.105 | 4.9E-03 | 8  | 41.7 |
| Q00059 | Transcription factor A, mitochondrial                                       | 1.33 | NA    | NA      | 2  | 11.0 |
| Q8NFB4 | Alpha/beta hydrolase domain-containing protein 11                           | 1.33 | NA    | NA      | 2  | 8.6  |
| P24534 | Elongation factor 1-beta                                                    | 1.33 | NA    | NA      | 2  | 7.1  |

Table S10-Sample UM26

|        |                                                                      |      |        |         |    |      |
|--------|----------------------------------------------------------------------|------|--------|---------|----|------|
| A1L0T0 | Acetolactate synthase-like protein                                   | 1.33 | NA     | NA      | 2  | 4.1  |
| P62269 | 40S ribosomal protein S18                                            | 1.32 | 0.060  | 3.5E-03 | 4  | 22.4 |
| P62280 | 40S ribosomal protein S11                                            | 1.32 | 0.046  | 4.0E-03 | 5  | 21.5 |
| P10644 | cAMP-dependent protein kinase type I-alpha regulatory subunit        | 1.32 | 0.528  | 3.8E-01 | 4  | 13.6 |
| Q14847 | LIM and SH3 domain protein 1                                         | 1.32 | 0.398  | 3.8E-01 | 4  | 18.4 |
| P27797 | Calreticulin                                                         | 1.32 | 0.278  | 1.1E-01 | 9  | 24.2 |
| P37108 | Signal recognition particle 14 kDa protein                           | 1.32 | 0.182  | 2.8E-01 | 3  | 22.1 |
| Q99873 | Protein arginine N-methyltransferase 1                               | 1.32 | NA     | NA      | 2  | 7.5  |
| P09525 | Annexin A4                                                           | 1.31 | 0.494  | 2.2E-02 | 7  | 16.6 |
| P48047 | ATP synthase subunit O, mitochondrial                                | 1.31 | 0.155  | 8.6E-03 | 4  | 22.5 |
| P47985 | Cytochrome b-c1 complex subunit Rieske, mitochondrial                | 1.31 | NA     | NA      | 2  | 8.0  |
| P30837 | Aldehyde dehydrogenase X, mitochondrial                              | 1.31 | 0.088  | 1.1E-02 | 5  | 14.1 |
| P62851 | 40S ribosomal protein S25                                            | 1.31 | 0.052  | 4.5E-04 | 4  | 24.0 |
| Q92841 | Probable ATP-dependent RNA helicase DDX17                            | 1.31 | 0.121  | 8.6E-02 | 4  | 7.4  |
| O00231 | 26S proteasome non-ATPase regulatory subunit 11                      | 1.31 | 0.046  | 1.2E-02 | 3  | 6.9  |
| P12830 | Cadherin-1                                                           | 1.30 | NA     | NA      | 2  | 3.4  |
| O75390 | Citrate synthase, mitochondrial                                      | 1.30 | 0.046  | 9.3E-03 | 5  | 11.8 |
| P21281 | V-type proton ATPase subunit B, brain isoform                        | 1.30 | 0.133  | 2.2E-02 | 4  | 9.8  |
| P09661 | U2 small nuclear ribonucleoprotein A'                                | 1.30 | NA     | NA      | 2  | 8.6  |
| P62318 | Small nuclear ribonucleoprotein Sm D3                                | 1.29 | NA     | NA      | 2  | 24.6 |
| P0CW22 | 40S ribosomal protein S17-like                                       | 1.29 | 0.069  | 4.2E-03 | 3  | 16.3 |
| P13804 | Electron transfer flavoprotein subunit alpha, mitochondrial          | 1.29 | NA     | NA      | 2  | 8.1  |
| P23396 | 40S ribosomal protein S3                                             | 1.29 | 0.058  | 5.4E-03 | 6  | 24.7 |
| O75367 | Core histone macro-H2A.1                                             | 1.29 | 0.823  | 8.3E-02 | 6  | 16.4 |
| P50897 | Palmitoyl-protein thioesterase 1                                     | 1.28 | 0.102  | 1.3E-01 | 3  | 10.5 |
| Q13459 | Unconventional myosin-IXb                                            | 1.28 | NA     | NA      | 2  | 1.1  |
| O75165 | DnaJ homolog subfamily C member 13                                   | 1.28 | NA     | NA      | 2  | 0.8  |
| Q9UNH7 | Sorting nexin-6                                                      | 1.28 | NA     | NA      | 2  | 3.2  |
| Q9BZ25 | Apoptosis inhibitor 5                                                | 1.28 | 0.696  | 4.9E-01 | 3  | 6.5  |
| Q9Y4W6 | AFG3-like protein 2                                                  | 1.28 | 0.138  | 9.4E-02 | 5  | 7.5  |
| P32969 | 60S ribosomal protein L9                                             | 1.28 | NA     | NA      | 2  | 5.7  |
| O75396 | Vesicle-trafficking protein SEC22b                                   | 1.28 | NA     | NA      | 2  | 12.6 |
| Q9UJZ1 | Stomatin-like protein 2, mitochondrial                               | 1.27 | NA     | NA      | 2  | 8.7  |
| P61026 | Ras-related protein Rab-10                                           | 1.27 | 0.146  | 1.8E-01 | 4  | 18.5 |
| O14737 | Programmed cell death protein 5                                      | 1.27 | NA     | NA      | 2  | 17.6 |
| Q3SY69 | Mitochondrial 10-formyltetrahydrofolate dehydrogenase                | 1.27 | NA     | NA      | 2  | 2.3  |
| O75306 | NADH dehydrogenase [ubiquinone] iron-sulfur protein 2, mitochondrial | 1.27 | 0.364  | 3.8E-01 | 3  | 6.7  |
| Q9NTJ5 | Phosphatidylinositol phosphatase SAC1                                | 1.25 | 0.030  | 3.7E-02 | 3  | 5.8  |
| O60486 | Plexin-C1                                                            | 1.25 | NA     | NA      | 2  | 1.4  |
| P63000 | Ras-related C3 botulinum toxin substrate 1                           | 1.25 | 0.031  | 1.5E-04 | 5  | 29.2 |
| P31146 | Coronin-1A                                                           | 1.25 | NA     | NA      | 2  | 4.6  |
| P15880 | 40S ribosomal protein S2                                             | 1.25 | 0.046  | 5.5E-03 | 3  | 10.2 |
| P62316 | Small nuclear ribonucleoprotein Sm D2                                | 1.25 | NA     | NA      | 2  | 16.1 |
| P30049 | ATP synthase subunit delta, mitochondrial                            | 1.24 | NA     | NA      | 2  | 13.7 |
| Q99623 | Prohibitin-2                                                         | 1.24 | 0.058  | 1.7E-02 | 8  | 29.4 |
| P38646 | Stress-70 protein, mitochondrial                                     | 1.24 | 0.178  | 1.4E-01 | 10 | 17.5 |
| Q93050 | V-type proton ATPase 116 kDa subunit a isoform 1                     | 1.24 | NA     | NA      | 2  | 4.1  |
| P00352 | Retinal dehydrogenase 1                                              | 1.24 | 0.067  | 2.1E-02 | 8  | 22.0 |
| P11142 | Heat shock cognate 71 kDa protein                                    | 1.24 | 0.106  | 1.4E-02 | 10 | 16.6 |
| Q13596 | Sorting nexin-1                                                      | 1.23 | 1.886  | 5.9E-01 | 3  | 7.7  |
| Q16851 | UTP--glucose-1-phosphate uridylyltransferase                         | 1.23 | 0.034  | 3.3E-02 | 3  | 6.3  |
| P43121 | Cell surface glycoprotein MUC18                                      | 1.23 | 0.158  | 1.2E-01 | 5  | 11.6 |
| P36578 | 60S ribosomal protein L4                                             | 1.23 | 0.560  | 3.7E-01 | 5  | 11.5 |
| O43852 | Calumenin                                                            | 1.22 | 0.181  | 1.4E-01 | 4  | 11.1 |
| P55265 | Double-stranded RNA-specific adenosine deaminase                     | 1.22 | NA     | NA      | 2  | 1.5  |
| P53990 | IST1 homolog                                                         | 1.22 | NA     | NA      | 2  | 4.4  |
| P62753 | 40S ribosomal protein S6                                             | 1.22 | 0.035  | 3.9E-04 | 3  | 12.0 |
| P59998 | Actin-related protein 2/3 complex subunit 4                          | 1.22 | 0.093  | 2.9E-01 | 3  | 16.1 |
| P38117 | Electron transfer flavoprotein subunit beta                          | 1.22 | 0.234  | 4.8E-01 | 3  | 13.7 |
| P30101 | Protein disulfide-isomerase A3                                       | 1.22 | 0.062  | 9.1E-03 | 14 | 26.1 |
| P35998 | 26S protease regulatory subunit 7                                    | 1.22 | NA     | NA      | 2  | 5.8  |
| Q13310 | Polyadenylate-binding protein 4                                      | 1.22 | NA     | NA      | 2  | 4.7  |
| P12270 | Nucleoprotein TPR                                                    | 1.22 | 0.593  | 4.1E-01 | 3  | 1.9  |
| Q14165 | Malectin                                                             | 1.22 | 0.118  | 1.8E-01 | 3  | 7.9  |
| P69905 | Hemoglobin subunit alpha                                             | 1.21 | 0.119  | 5.0E-03 | 7  | 61.3 |
| P61225 | Ras-related protein Rap-2b                                           | 1.21 | NA     | NA      | 2  | 10.4 |
| O94826 | Mitochondrial import receptor subunit TOM70                          | 1.21 | 0.153  | 2.2E-01 | 3  | 4.3  |
| P18124 | 60S ribosomal protein L7                                             | 1.21 | 0.058  | 9.9E-03 | 6  | 20.6 |
| P78371 | T-complex protein 1 subunit beta                                     | 1.20 | 0.143  | 1.6E-01 | 8  | 14.4 |
| P53597 | Succinyl-CoA ligase [ADP/GDP-forming] subunit alpha, mitochondrial   | 1.20 | NA     | NA      | 2  | 6.9  |
| Q14980 | Nuclear mitotic apparatus protein 1                                  | 1.20 | 0.172  | 9.9E-02 | 7  | 4.1  |
| O75947 | ATP synthase subunit d, mitochondrial                                | 1.20 | 0.127  | 2.1E-01 | 3  | 15.5 |
| P43686 | 26S protease regulatory subunit 6B                                   | 1.20 | 0.041  | 2.5E-02 | 4  | 10.3 |
| P20810 | Calpastatin                                                          | 1.19 | 0.122  | 4.9E-01 | 3  | 8.2  |
| O15511 | Actin-related protein 2/3 complex subunit 5                          | 1.19 | 0.067  | 1.4E-01 | 3  | 21.9 |
| P06730 | Eukaryotic translation initiation factor 4E                          | 1.19 | NA     | NA      | 2  | 9.7  |
| P49821 | NADH dehydrogenase [ubiquinone] flavoprotein 1, mitochondrial        | 1.19 | NA     | NA      | 2  | 3.4  |
| P26038 | Moesin                                                               | 1.18 | 0.095  | 1.1E-02 | 11 | 13.9 |
| Q16543 | Hsp90 co-chaperone Cdc37                                             | 1.18 | NA     | NA      | 2  | 5.3  |
| Q14152 | Eukaryotic translation initiation factor 3 subunit A                 | 1.18 | NA     | NA      | 2  | 1.8  |
| P14314 | Glucosidase 2 subunit beta                                           | 1.17 | 0.188  | 1.9E-01 | 11 | 18.6 |
| P61106 | Ras-related protein Rab-14                                           | 1.17 | 0.088  | 2.2E-01 | 4  | 21.4 |
| Q06830 | Peroxisiredoxin-1                                                    | 1.17 | 0.134  | 6.6E-02 | 10 | 48.7 |
| Q86VP6 | Cullin-associated NEDD8-dissociated protein 1                        | 1.17 | 0.410  | 3.8E-01 | 5  | 4.2  |
| Q8N1G4 | Leucine-rich repeat-containing protein 47                            | 1.16 | 0.038  | 2.5E-02 | 4  | 7.0  |
| P31150 | Rab GDP dissociation inhibitor alpha                                 | 1.15 | NA     | NA      | 2  | 5.4  |
| P07237 | Protein disulfide-isomerase                                          | 1.15 | 0.128  | 1.9E-01 | 13 | 21.5 |
| P02774 | Vitamin D-binding protein                                            | 1.15 | NA     | NA      | 2  | 3.0  |
| Q9Y411 | Unconventional myosin-Va                                             | 1.14 | NA     | NA      | 2  | 1.3  |
| P40939 | Trifunctional enzyme subunit alpha, mitochondrial                    | 1.13 | 0.073  | 5.9E-02 | 10 | 14.3 |
| P20700 | Lamin-B1                                                             | 1.13 | 0.053  | 2.7E-02 | 6  | 10.4 |
| Q16629 | Serine/arginine-rich splicing factor 7                               | 1.12 | NA     | NA      | 2  | 7.6  |
| P13796 | Plastin-2                                                            | 1.12 | 0.168  | 3.5E-01 | 5  | 8.5  |
| P46781 | 40S ribosomal protein S9                                             | 1.12 | 0.682  | 4.9E-01 | 6  | 22.7 |
| P27708 | CAD protein                                                          | 1.12 | NA     | NA      | 2  | 0.9  |
| P01023 | Alpha-2-macroglobulin                                                | 1.12 | 0.102  | 9.7E-02 | 5  | 3.9  |
| P14866 | Heterogeneous nuclear ribonucleoprotein L                            | 1.12 | 0.220  | 2.1E-01 | 5  | 10.2 |
| Q9H3N1 | Thioredoxin-related transmembrane protein 1                          | 1.11 | NA     | NA      | 2  | 8.2  |
| Q53GQ0 | Estradiol 17-beta-dehydrogenase 12                                   | 1.11 | 0.093  | 1.8E-01 | 4  | 15.1 |
| Q9Y265 | RuvB-like 1                                                          | 1.11 | NA     | NA      | 2  | 5.0  |
| P35613 | Basigin                                                              | 1.11 | NA     | NA      | 2  | 8.3  |
| P13073 | Cytochrome c oxidase subunit 4 isoform 1, mitochondrial              | 1.10 | 0.550  | 6.5E-01 | 3  | 19.5 |
| P54709 | Sodium/potassium-transporting ATPase subunit beta-3                  | 1.10 | 0.101  | 4.0E-01 | 4  | 15.8 |
| Q8NBS9 | Thioredoxin domain-containing protein 5                              | 1.10 | 14.905 | 7.3E-01 | 3  | 4.6  |
| P49368 | T-complex protein 1 subunit gamma                                    | 1.10 | 0.117  | 1.2E-01 | 8  | 15.4 |
| Q86UP2 | Kinectin                                                             | 1.10 | 0.342  | 5.8E-01 | 5  | 4.3  |
| P45880 | Voltage-dependent anion-selective channel protein 2                  | 1.10 | 0.163  | 3.0E-01 | 7  | 24.5 |

Table S10-Sample UM26

|        |                                                                                                                   |      |       |         |    |      |
|--------|-------------------------------------------------------------------------------------------------------------------|------|-------|---------|----|------|
| P40429 | 60S ribosomal protein L13a                                                                                        | 1.10 | 0.173 | 3.6E-01 | 6  | 23.6 |
| P29692 | Elongation factor 1-delta                                                                                         | 1.09 | 0.199 | 6.8E-01 | 3  | 11.4 |
| Q9BX00 | EMILIN-2                                                                                                          | 1.09 | 2.156 | 7.2E-01 | 3  | 3.1  |
| P42858 | Huntingtin                                                                                                        | 1.09 | NA    | NA      | 2  | 0.5  |
| P61160 | Actin-related protein 2                                                                                           | 1.09 | 0.334 | 4.0E-01 | 4  | 10.7 |
| P46109 | Crk-like protein                                                                                                  | 1.08 | NA    | NA      | 2  | 7.9  |
| Q92896 | Golgi apparatus protein 1                                                                                         | 1.08 | 0.047 | 1.8E-01 | 3  | 2.5  |
| Q02543 | 60S ribosomal protein L18a                                                                                        | 1.08 | NA    | NA      | 2  | 10.2 |
| P01857 | Ig gamma-1 chain C region                                                                                         | 1.08 | 0.192 | 2.1E-01 | 4  | 18.5 |
| Q9UNZ2 | NSFL1 cofactor p47                                                                                                | 1.08 | NA    | NA      | 2  | 7.8  |
| Q9Y2B0 | Protein canopy homolog 2                                                                                          | 1.08 | NA    | NA      | 2  | 13.7 |
| Q9NSE4 | Isoleucine--tRNA ligase, mitochondrial                                                                            | 1.08 | 3.183 | 6.0E-01 | 4  | 5.9  |
| O75340 | Programmed cell death protein 6                                                                                   | 1.08 | 0.438 | 4.8E-01 | 3  | 16.2 |
| P06576 | ATP synthase subunit beta, mitochondrial                                                                          | 1.08 | 0.084 | 2.0E-01 | 10 | 24.6 |
| Q9HD20 | Manganese-transporting ATPase 13A1                                                                                | 1.07 | 0.187 | 7.9E-01 | 3  | 3.6  |
| P46782 | 40S ribosomal protein S5                                                                                          | 1.07 | 1.281 | 6.0E-01 | 3  | 8.8  |
| O15173 | Membrane-associated progesterone receptor component 2                                                             | 1.07 | 0.114 | 2.5E-01 | 3  | 17.9 |
| Q01844 | RNA-binding protein EWS                                                                                           | 1.07 | NA    | NA      | 2  | 2.3  |
| P50454 | Serin H1                                                                                                          | 1.06 | NA    | NA      | 2  | 6.0  |
| P07919 | Cytochrome b-c1 complex subunit 6, mitochondrial                                                                  | 1.06 | NA    | NA      | 2  | 15.4 |
| P58876 | Histone H2B type 1-D                                                                                              | 1.06 | NA    | NA      | 2  | 7.9  |
| O43707 | Alpha-actinin-4                                                                                                   | 1.06 | 0.193 | 1.4E-01 | 22 | 27.7 |
| P62701 | 40S ribosomal protein S4, X isoform                                                                               | 1.06 | 0.133 | 2.9E-01 | 4  | 9.5  |
| P11586 | C-1-tetrahydrofolate synthase, cytoplasmic                                                                        | 1.05 | 0.119 | 3.5E-01 | 5  | 6.6  |
| P61247 | 40S ribosomal protein S3a                                                                                         | 1.05 | 0.407 | 8.9E-01 | 6  | 20.5 |
| P04632 | Calpain small subunit 1                                                                                           | 1.05 | 0.744 | 6.4E-01 | 3  | 9.0  |
| Q9P2E9 | Ribosome-binding protein 1                                                                                        | 1.05 | 0.218 | 6.4E-01 | 5  | 4.1  |
| P50213 | Isocitrate dehydrogenase [NAD] subunit alpha, mitochondrial                                                       | 1.05 | 0.319 | 6.4E-01 | 3  | 10.1 |
| Q9HDC9 | Adipocyte plasma membrane-associated protein                                                                      | 1.04 | NA    | NA      | 2  | 5.5  |
| P02042 | Hemoglobin subunit delta                                                                                          | 1.04 | NA    | NA      | 2  | 17.7 |
| Q09874 | Poly [ADP-ribose] polymerase 1                                                                                    | 1.04 | 0.396 | 8.4E-01 | 6  | 7.7  |
| Q15393 | Splicing factor 3B subunit 3                                                                                      | 1.04 | NA    | NA      | 2  | 2.1  |
| P50502 | Hsc70-interacting protein                                                                                         | 1.03 | 0.873 | 6.9E-01 | 3  | 8.9  |
| P55072 | Transitional endoplasmic reticulum ATPase                                                                         | 1.03 | 0.424 | 4.4E-01 | 11 | 14.0 |
| P01009 | Alpha-1-antitrypsin                                                                                               | 1.03 | 0.280 | 6.7E-01 | 10 | 24.2 |
| Q9UQE7 | Structural maintenance of chromosomes protein 3                                                                   | 1.03 | NA    | NA      | 2  | 1.7  |
| P35580 | Myosin-10                                                                                                         | 1.03 | 0.601 | 5.8E-01 | 23 | 14.1 |
| Q99442 | Translocation protein SEC62                                                                                       | 1.03 | 0.282 | 8.1E-01 | 3  | 7.3  |
| P25705 | ATP synthase subunit alpha, mitochondrial                                                                         | 1.03 | 0.188 | 6.0E-01 | 14 | 26.8 |
| Q9UHD8 | Septin-9                                                                                                          | 1.03 | 0.439 | 8.5E-01 | 4  | 7.2  |
| Q9Y3U8 | 60S ribosomal protein L36                                                                                         | 1.02 | 0.598 | 9.1E-01 | 3  | 21.9 |
| P62136 | Serine/threonine-protein phosphatase PP1-alpha catalytic subunit                                                  | 1.02 | 0.082 | 5.8E-01 | 3  | 9.7  |
| Q02818 | Nucleobindin-1                                                                                                    | 1.02 | NA    | NA      | 2  | 4.8  |
| Q16795 | NADH dehydrogenase [ubiquinone] 1 alpha subcomplex subunit 9, mitochondrial                                       | 1.02 | 0.281 | 8.9E-01 | 3  | 9.8  |
| P48681 | Nestin                                                                                                            | 1.01 | NA    | NA      | 2  | 1.5  |
| Q15233 | Non-POU domain-containing octamer-binding protein                                                                 | 1.01 | 0.294 | 9.6E-01 | 4  | 6.6  |
| P35221 | Catenin alpha-1                                                                                                   | 1.01 | 0.422 | 9.7E-01 | 4  | 5.4  |
| P50990 | T-complex protein 1 subunit theta                                                                                 | 1.00 | 1.381 | 9.6E-01 | 11 | 19.7 |
| P10606 | Cytochrome c oxidase subunit 5B, mitochondrial                                                                    | 1.00 | 0.544 | 9.9E-01 | 5  | 25.6 |
| P39023 | 60S ribosomal protein L3                                                                                          | 1.00 | NA    | NA      | 2  | 6.0  |
| P61421 | V-type proton ATPase subunit d 1                                                                                  | 1.00 | 0.242 | 9.4E-01 | 3  | 7.7  |
| Q13162 | Peroxisomal protein 4                                                                                             | 1.00 | 0.081 | 9.8E-01 | 3  | 12.9 |
| Q8N5K1 | CDGSH iron-sulfur domain-containing protein 2                                                                     | 0.99 | NA    | NA      | 2  | 15.6 |
| P02545 | Prelamin-A/C                                                                                                      | 0.99 | 0.408 | 8.0E-01 | 34 | 49.8 |
| O75964 | ATP synthase subunit g, mitochondrial                                                                             | 0.99 | 0.219 | 8.8E-01 | 3  | 38.8 |
| P22695 | Cytochrome b-c1 complex subunit 2, mitochondrial                                                                  | 0.99 | 0.765 | 8.9E-01 | 6  | 17.0 |
| P17858 | ATP-dependent 6-phosphofructokinase, liver type                                                                   | 0.99 | 0.739 | 9.5E-01 | 4  | 6.4  |
| P36957 | Dihydropyridyllysine-residue succinyltransferase component of 2-oxoglutarate dehydrogenase complex, mitochondrial | 0.99 | 0.080 | 7.7E-01 | 5  | 11.5 |
| P54920 | Alpha-soluble NSF attachment protein                                                                              | 0.99 | 0.532 | 9.3E-01 | 5  | 17.6 |
| O75643 | U5 small nuclear ribonucleoprotein 200 kDa helicase                                                               | 0.99 | NA    | NA      | 2  | 0.9  |
| P11021 | 78 kDa glucose-regulated protein                                                                                  | 0.98 | 0.203 | 7.4E-01 | 21 | 29.4 |
| Q92499 | ATP-dependent RNA helicase DDX1                                                                                   | 0.98 | 1.230 | 8.9E-01 | 5  | 5.9  |
| Q7L5N1 | COP9 signalosome complex subunit 6                                                                                | 0.98 | 0.102 | 6.5E-01 | 3  | 10.1 |
| P08107 | Heat shock 70 kDa protein 1A/1B                                                                                   | 0.98 | 0.337 | 7.9E-01 | 14 | 23.1 |
| P04844 | Dolichyl-diphosphooligosaccharide--protein glycosyltransferase subunit 2                                          | 0.98 | NA    | NA      | 2  | 4.1  |
| Q9UBQ0 | Vacuolar protein sorting-associated protein 29                                                                    | 0.98 | NA    | NA      | 2  | 8.2  |
| O60506 | Heterogeneous nuclear ribonucleoprotein Q                                                                         | 0.98 | NA    | NA      | 2  | 2.9  |
| P31689 | DnaJ homolog subfamily A member 1                                                                                 | 0.97 | NA    | NA      | 2  | 4.8  |
| Q00765 | Receptor expression-enhancing protein 5                                                                           | 0.96 | 0.785 | 7.8E-01 | 3  | 10.6 |
| Q9Y3Z3 | Deoxynucleoside triphosphate triphosphohydrolase SAMHD1                                                           | 0.96 | NA    | NA      | 2  | 3.5  |
| P11177 | Pyruvate dehydrogenase E1 component subunit beta, mitochondrial                                                   | 0.96 | 0.512 | 5.5E-01 | 3  | 7.2  |
| P10515 | Dihydropyridyllysine-residue acetyltransferase component of pyruvate dehydrogenase complex, mitochondrial         | 0.96 | NA    | NA      | 2  | 2.6  |
| Q02878 | 60S ribosomal protein L6                                                                                          | 0.96 | 0.090 | 5.5E-01 | 5  | 18.4 |
| P18077 | 60S ribosomal protein L35a                                                                                        | 0.95 | NA    | NA      | 2  | 17.3 |
| Q14108 | Lysosome membrane protein 2                                                                                       | 0.95 | NA    | NA      | 2  | 4.6  |
| P50402 | Emerin                                                                                                            | 0.95 | 0.314 | 7.6E-01 | 4  | 17.3 |
| O75915 | PRA1 family protein 3                                                                                             | 0.95 | NA    | NA      | 2  | 9.6  |
| Q96AE4 | Far upstream element-binding protein 1                                                                            | 0.95 | 1.644 | 8.5E-01 | 3  | 4.5  |
| Q9NYU2 | UDP-glucose:glycoprotein glucosyltransferase 1                                                                    | 0.95 | NA    | NA      | 2  | 1.5  |
| P30153 | Serine/threonine-protein phosphatase 2A 65 kDa regulatory subunit A alpha isoform                                 | 0.94 | NA    | NA      | 2  | 4.8  |
| Q02252 | Methylmalonate-semialdehyde dehydrogenase [acylating], mitochondrial                                              | 0.94 | 0.138 | 4.8E-01 | 3  | 6.2  |
| P63092 | Guanine nucleotide-binding protein G(s) subunit alpha isoforms short                                              | 0.94 | 0.456 | 8.4E-01 | 3  | 10.4 |
| Q00325 | Phosphate carrier protein, mitochondrial                                                                          | 0.94 | 0.216 | 5.6E-01 | 5  | 13.5 |
| P68871 | Hemoglobin subunit beta                                                                                           | 0.94 | 0.127 | 3.7E-01 | 5  | 44.9 |
| O60716 | Catenin delta-1                                                                                                   | 0.93 | NA    | NA      | 2  | 2.0  |
| P11940 | Polyadenylate-binding protein 1                                                                                   | 0.93 | 0.113 | 2.5E-01 | 4  | 8.2  |
| Q16891 | Mitochondrial inner membrane protein                                                                              | 0.93 | 0.523 | 5.4E-01 | 7  | 11.3 |
| P53618 | Coatamer subunit beta                                                                                             | 0.93 | NA    | NA      | 2  | 1.7  |
| P11216 | Glycogen phosphorylase, brain form                                                                                | 0.93 | 0.128 | 4.3E-01 | 4  | 6.3  |
| Q7KZF4 | Staphylococcal nuclease domain-containing protein 1                                                               | 0.92 | 0.299 | 6.2E-01 | 4  | 4.8  |
| O60313 | Dynamin-like 120 kDa protein, mitochondrial                                                                       | 0.92 | 0.054 | 2.1E-01 | 4  | 6.4  |
| O95299 | NADH dehydrogenase [ubiquinone] 1 alpha subcomplex subunit 10, mitochondrial                                      | 0.92 | NA    | NA      | 2  | 2.8  |
| P61586 | Transforming protein RhoA                                                                                         | 0.92 | 0.220 | 4.5E-01 | 5  | 24.9 |
| Q07020 | 60S ribosomal protein L18                                                                                         | 0.91 | NA    | NA      | 2  | 13.8 |
| Q13200 | 26S proteasome non-ATPase regulatory subunit 2                                                                    | 0.90 | NA    | NA      | 2  | 2.3  |
| Q9Y262 | Eukaryotic translation initiation factor 3 subunit L                                                              | 0.90 | 0.954 | 6.7E-01 | 3  | 4.6  |
| Q99832 | T-complex protein 1 subunit eta                                                                                   | 0.90 | 0.070 | 2.5E-01 | 3  | 6.6  |
| Q9UHQ9 | NADH-cytochrome b5 reductase 1                                                                                    | 0.90 | 0.451 | 5.1E-01 | 3  | 9.8  |
| P00738 | Haptoglobin                                                                                                       | 0.90 | 0.132 | 2.2E-01 | 8  | 20.0 |
| P17987 | T-complex protein 1 subunit alpha                                                                                 | 0.90 | 0.101 | 2.4E-01 | 6  | 11.5 |
| P39656 | Dolichyl-diphosphooligosaccharide--protein glycosyltransferase 48 kDa subunit                                     | 0.89 | 0.054 | 4.3E-02 | 5  | 10.3 |
| P30048 | Thioredoxin-dependent peroxide reductase, mitochondrial                                                           | 0.89 | NA    | NA      | 2  | 7.0  |
| P33176 | Kinesin-1 heavy chain                                                                                             | 0.88 | NA    | NA      | 2  | 3.0  |
| P35222 | Catenin beta-1                                                                                                    | 0.88 | 0.021 | 7.1E-03 | 6  | 9.3  |
| Q13561 | Dynactin subunit 2                                                                                                | 0.88 | 0.292 | 3.2E-01 | 5  | 13.0 |
| Q9BRX8 | Redox-regulatory protein FAM213A                                                                                  | 0.88 | 0.448 | 2.9E-01 | 4  | 16.6 |
| P09543 | 2',3'-cyclic-nucleotide 3'-phosphodiesterase                                                                      | 0.88 | 0.084 | 1.8E-01 | 6  | 11.9 |

Table S10-Sample UM26

|        |                                                                              |      |       |         |    |      |
|--------|------------------------------------------------------------------------------|------|-------|---------|----|------|
| Q9UIJ7 | GTP:AMP phosphotransferase AK3, mitochondrial                                | 0.88 | 0.094 | 2.1E-01 | 3  | 15.0 |
| P48643 | T-complex protein 1 subunit epsilon                                          | 0.88 | 0.256 | 3.1E-01 | 7  | 12.6 |
| P28331 | NADH-ubiquinone oxidoreductase 75 kDa subunit, mitochondrial                 | 0.87 | NA    | NA      | 2  | 2.3  |
| O95865 | N(G),N(G)-dimethylarginine dimethylaminohydrolase 2                          | 0.87 | NA    | NA      | 2  | 8.4  |
| P51572 | B-cell receptor-associated protein 31                                        | 0.87 | 0.727 | 3.8E-01 | 7  | 27.2 |
| P43304 | Glycerol-3-phosphate dehydrogenase, mitochondrial                            | 0.86 | 0.186 | 3.6E-01 | 3  | 5.2  |
| P31930 | Cytochrome b-c1 complex subunit 1, mitochondrial                             | 0.86 | 0.326 | 3.3E-01 | 4  | 9.8  |
| P60709 | Actin, cytoplasmic 1                                                         | 0.86 | 0.084 | 4.5E-02 | 5  | 21.3 |
| P00505 | Aspartate aminotransferase, mitochondrial                                    | 0.86 | 1.264 | 2.3E-01 | 6  | 16.7 |
| P24752 | Acetyl-CoA acetyltransferase, mitochondrial                                  | 0.86 | 0.430 | 4.8E-01 | 4  | 10.1 |
| P46977 | Dolichyl-diphosphooligosaccharide--protein glycosyltransferase subunit STT3A | 0.85 | NA    | NA      | 2  | 2.3  |
| P14927 | Cytochrome b-c1 complex subunit 7                                            | 0.85 | NA    | NA      | 2  | 20.7 |
| O94979 | Protein transport protein Sec31A                                             | 0.85 | NA    | NA      | 2  | 2.3  |
| P04843 | Dolichyl-diphosphooligosaccharide--protein glycosyltransferase subunit 1     | 0.85 | 0.093 | 4.2E-02 | 9  | 15.5 |
| P30533 | Alpha-2-macroglobulin receptor-associated protein                            | 0.85 | NA    | NA      | 2  | 4.5  |
| Q13098 | COP9 signalosome complex subunit 1                                           | 0.85 | 1.196 | 7.9E-01 | 3  | 5.3  |
| Q12797 | Aspartyl/asparaginyl beta-hydroxylase                                        | 0.85 | 0.210 | 4.0E-01 | 4  | 4.1  |
| Q15075 | Early endosome antigen 1                                                     | 0.85 | NA    | NA      | 2  | 1.9  |
| Q10567 | AP-1 complex subunit beta-1                                                  | 0.84 | NA    | NA      | 2  | 2.1  |
| Q02218 | 2-oxoglutarate dehydrogenase, mitochondrial                                  | 0.84 | 0.114 | 6.5E-02 | 7  | 8.5  |
| Q13228 | Selenium-binding protein 1                                                   | 0.84 | NA    | NA      | 2  | 4.9  |
| Q9Y277 | Voltage-dependent anion-selective channel protein 3                          | 0.83 | NA    | NA      | 2  | 8.5  |
| Q14204 | Cytoplasmic dynein 1 heavy chain 1                                           | 0.83 | 0.055 | 4.5E-04 | 35 | 8.0  |
| Q9POL0 | Vesicle-associated membrane protein-associated protein A                     | 0.83 | NA    | NA      | 2  | 11.2 |
| P04217 | Alpha-1B-glycoprotein                                                        | 0.82 | NA    | NA      | 2  | 4.8  |
| P38919 | Eukaryotic initiation factor 4A-III                                          | 0.82 | 0.026 | 2.6E-01 | 3  | 9.2  |
| P24539 | ATP synthase F(0) complex subunit B1, mitochondrial                          | 0.82 | NA    | NA      | 2  | 9.0  |
| P28838 | Cytosol aminopeptidase                                                       | 0.82 | 0.879 | 6.5E-01 | 4  | 10.8 |
| Q9NQC3 | Reticulon-4                                                                  | 0.82 | NA    | NA      | 2  | 2.3  |
| P50991 | T-complex protein 1 subunit delta                                            | 0.82 | 0.169 | 8.4E-02 | 4  | 8.5  |
| P27824 | Calnexin                                                                     | 0.82 | 0.236 | 6.6E-02 | 12 | 20.6 |
| O43242 | 26S proteasome non-ATPase regulatory subunit 3                               | 0.82 | NA    | NA      | 2  | 3.0  |
| P05388 | 60S acidic ribosomal protein P0                                              | 0.81 | 0.710 | 4.4E-01 | 3  | 10.1 |
| P16615 | Sarcoplasmic/endoplasmic reticulum calcium ATPase 2                          | 0.81 | 0.033 | 1.4E-03 | 6  | 5.8  |
| Q9Y310 | tRNA-splicing ligase RtcB homolog                                            | 0.81 | 0.216 | 3.2E-01 | 5  | 12.7 |
| P02511 | Alpha-crystallin B chain                                                     | 0.81 | 0.137 | 4.4E-02 | 6  | 35.4 |
| P53621 | Coatamer subunit alpha                                                       | 0.81 | 0.266 | 5.0E-01 | 3  | 2.9  |
| P40227 | T-complex protein 1 subunit zeta                                             | 0.81 | 0.580 | 5.2E-01 | 3  | 5.6  |
| O14950 | Myosin regulatory light chain 12B                                            | 0.81 | 0.078 | 1.8E-03 | 3  | 12.8 |
| Q969X5 | Endoplasmic reticulum-Golgi intermediate compartment protein 1               | 0.81 | NA    | NA      | 2  | 6.2  |
| Q71U36 | Tubulin alpha-1A chain                                                       | 0.81 | NA    | NA      | 2  | 6.7  |
| P12236 | ADP/ATP translocase 3                                                        | 0.80 | 0.096 | 1.3E-02 | 7  | 21.8 |
| P49748 | Very long-chain specific acyl-CoA dehydrogenase, mitochondrial               | 0.80 | 0.216 | 1.5E-01 | 7  | 9.3  |
| P50995 | Annexin A11                                                                  | 0.80 | NA    | NA      | 2  | 4.4  |
| P42765 | 3-ketoacyl-CoA thiolase, mitochondrial                                       | 0.80 | 0.148 | 4.0E-01 | 3  | 9.6  |
| P04179 | Superoxide dismutase [Mn], mitochondrial                                     | 0.80 | 0.239 | 1.9E-01 | 7  | 24.3 |
| Q9GZM7 | Tubulointerstitial nephritis antigen-like                                    | 0.80 | NA    | NA      | 2  | 6.2  |
| Q13423 | NAD(P) transhydrogenase, mitochondrial                                       | 0.79 | NA    | NA      | 2  | 2.3  |
| Q9BS26 | Endoplasmic reticulum resident protein 44                                    | 0.79 | 0.064 | 2.6E-02 | 3  | 7.9  |
| P08133 | Annexin A6                                                                   | 0.79 | 0.038 | 4.2E-07 | 27 | 44.3 |
| Q8IVF2 | Protein AHNAK2                                                               | 0.79 | NA    | NA      | 2  | 0.4  |
| Q9NZ08 | Endoplasmic reticulum aminopeptidase 1                                       | 0.79 | NA    | NA      | 2  | 2.2  |
| Q14203 | Dynactin subunit 1                                                           | 0.78 | 0.056 | 8.8E-03 | 4  | 4.1  |
| O00203 | AP-3 complex subunit beta-1                                                  | 0.78 | NA    | NA      | 2  | 2.7  |
| P09496 | Clathrin light chain A                                                       | 0.78 | NA    | NA      | 2  | 5.6  |
| P46937 | Yorkie homolog                                                               | 0.78 | NA    | NA      | 2  | 6.2  |
| P47756 | F-actin-capping protein subunit beta                                         | 0.78 | 0.118 | 1.5E-01 | 3  | 11.6 |
| P07384 | Calpain-1 catalytic subunit                                                  | 0.77 | NA    | NA      | 2  | 3.9  |
| P00390 | Glutathione reductase, mitochondrial                                         | 0.77 | NA    | NA      | 2  | 5.7  |
| O43390 | Heterogeneous nuclear ribonucleoprotein R                                    | 0.77 | 0.079 | 1.0E-02 | 6  | 8.7  |
| P04040 | Catalase                                                                     | 0.77 | 0.057 | 1.7E-01 | 3  | 6.5  |
| Q6IAA8 | Regulator complex protein LAMTOR1                                            | 0.76 | NA    | NA      | 2  | 17.4 |
| P05556 | Integrin beta-1                                                              | 0.75 | 0.234 | 7.9E-02 | 5  | 6.8  |
| Q16698 | 2,4-dienoyl-CoA reductase, mitochondrial                                     | 0.75 | 0.275 | 5.6E-01 | 3  | 11.3 |
| Q9UHG3 | Prenylcysteine oxidase 1                                                     | 0.75 | 0.103 | 1.1E-01 | 3  | 6.3  |
| P43307 | Translocon-associated protein subunit alpha                                  | 0.75 | NA    | NA      | 2  | 6.6  |
| P61626 | Lysozyme C                                                                   | 0.75 | NA    | NA      | 2  | 12.8 |
| P14625 | Endoplasmin                                                                  | 0.75 | 0.050 | 2.9E-06 | 10 | 13.4 |
| P00387 | NADH-cytochrome b5 reductase 3                                               | 0.75 | 0.191 | 8.6E-02 | 5  | 18.3 |
| P13667 | Protein disulfide-isomerase A4                                               | 0.74 | 0.075 | 9.7E-04 | 7  | 11.3 |
| Q5SSJ5 | Heterochromatin protein 1-binding protein 3                                  | 0.74 | NA    | NA      | 2  | 5.2  |
| Q93009 | Ubiquitin carboxyl-terminal hydrolase 7                                      | 0.74 | NA    | NA      | 2  | 1.5  |
| P31153 | S-adenosylmethionine synthase isoform type-2                                 | 0.74 | NA    | NA      | 2  | 7.6  |
| P62805 | Histone H4                                                                   | 0.73 | 0.034 | 1.0E-08 | 8  | 52.4 |
| P17655 | Calpain-2 catalytic subunit                                                  | 0.73 | NA    | NA      | 2  | 2.9  |
| P0C0S5 | Histone H2A.Z                                                                | 0.73 | NA    | NA      | 2  | 18.8 |
| Q8WUM4 | Programmed cell death 6-interacting protein                                  | 0.73 | 0.056 | 1.4E-02 | 5  | 6.2  |
| P62873 | Guanine nucleotide-binding protein G(I)/G(S)/G(T) subunit beta-1             | 0.72 | NA    | NA      | 2  | 9.4  |
| P01860 | Ig gamma-3 chain C region                                                    | 0.72 | 0.092 | 3.8E-02 | 3  | 6.4  |
| Q07065 | Cytoskeleton-associated protein 4                                            | 0.72 | 0.068 | 3.0E-03 | 5  | 11.8 |
| Q15293 | Reticulocalbin-1                                                             | 0.71 | 0.253 | 2.0E-01 | 3  | 8.2  |
| P48735 | Isocitrate dehydrogenase [NADP], mitochondrial                               | 0.71 | 0.127 | 4.4E-02 | 4  | 10.6 |
| P07305 | Histone H1.0                                                                 | 0.71 | 0.058 | 1.3E-01 | 4  | 20.6 |
| Q9P0M6 | Core histone macro-H2A.2                                                     | 0.71 | NA    | NA      | 2  | 7.3  |
| P00367 | Glutamate dehydrogenase 1, mitochondrial                                     | 0.70 | 0.136 | 6.1E-02 | 8  | 16.5 |
| P21589 | 5'-nucleotidase                                                              | 0.70 | NA    | NA      | 2  | 4.0  |
| P13987 | CD59 glycoprotein                                                            | 0.69 | NA    | NA      | 2  | 15.6 |
| P13861 | cAMP-dependent protein kinase type II-alpha regulatory subunit               | 0.69 | 0.096 | 7.6E-02 | 4  | 13.9 |
| P68371 | Tubulin beta-4B chain                                                        | 0.67 | 0.033 | 5.9E-10 | 3  | 9.9  |
| Q00610 | Clathrin heavy chain 1                                                       | 0.67 | 0.040 | 7.1E-10 | 23 | 15.4 |
| Q9BSJ8 | Extended synaptotagmin-1                                                     | 0.67 | 0.130 | 6.2E-02 | 3  | 3.5  |
| Q14344 | Guanine nucleotide-binding protein subunit alpha-13                          | 0.67 | 0.022 | 3.8E-04 | 3  | 8.5  |
| P17980 | 26S protease regulatory subunit 6A                                           | 0.67 | 0.040 | 2.0E-02 | 3  | 5.5  |
| P01834 | Ig kappa chain C region                                                      | 0.66 | NA    | NA      | 2  | 34.9 |
| P67936 | Tropomyosin alpha-4 chain                                                    | 0.66 | 0.166 | 9.6E-03 | 8  | 25.8 |
| Q13425 | Beta-2-syntrophin                                                            | 0.66 | NA    | NA      | 2  | 3.1  |
| P05023 | Sodium/potassium-transporting ATPase subunit alpha-1                         | 0.65 | 0.034 | 4.4E-07 | 20 | 22.4 |
| P04899 | Guanine nucleotide-binding protein G(I) subunit alpha-2                      | 0.64 | NA    | NA      | 2  | 7.6  |
| P05091 | Aldehyde dehydrogenase, mitochondrial                                        | 0.64 | 0.165 | 7.1E-02 | 3  | 6.0  |
| O00264 | Membrane-associated progesterone receptor component 1                        | 0.63 | 0.122 | 9.1E-03 | 3  | 12.3 |
| Q99584 | Protein S100-A13                                                             | 0.63 | 0.095 | 6.4E-03 | 5  | 41.8 |
| Q16695 | Histone H3.1t                                                                | 0.62 | 0.062 | 2.1E-04 | 3  | 14.7 |
| P61769 | Beta-2-microglobulin                                                         | 0.62 | 0.119 | 2.5E-02 | 3  | 19.3 |
| P17612 | cAMP-dependent protein kinase catalytic subunit alpha                        | 0.62 | NA    | NA      | 2  | 4.3  |
| Q03252 | Lamin-B2                                                                     | 0.62 | 0.042 | 6.1E-05 | 16 | 27.8 |
| Q6DD88 | Atlastin-3                                                                   | 0.62 | 0.045 | 1.8E-01 | 3  | 5.7  |
| P06899 | Histone H2B type 1-J                                                         | 0.62 | NA    | NA      | 2  | 7.9  |

Table S10-Sample UM26

|        |                                                                            |      |       |         |    |      |
|--------|----------------------------------------------------------------------------|------|-------|---------|----|------|
| P83731 | 60S ribosomal protein L24                                                  | 0.61 | NA    | NA      | 2  | 13.4 |
| P09497 | Claathrin light chain B                                                    | 0.61 | NA    | NA      | 2  | 8.3  |
| Q08722 | Leukocyte surface antigen CD47                                             | 0.61 | NA    | NA      | 2  | 5.9  |
| Q01082 | Spectrin beta chain, non-erythrocytic 1                                    | 0.60 | 0.033 | 2.2E-16 | 54 | 27.1 |
| O94905 | Erlin-2                                                                    | 0.60 | NA    | NA      | 2  | 5.0  |
| P01042 | Kininogen-1                                                                | 0.60 | 0.122 | 1.9E-02 | 4  | 6.1  |
| P01024 | Complement C3                                                              | 0.60 | 0.157 | 3.1E-03 | 22 | 13.2 |
| P11413 | Glucose-6-phosphate 1-dehydrogenase                                        | 0.59 | NA    | NA      | 2  | 3.7  |
| P06727 | Apolipoprotein A-IV                                                        | 0.59 | 0.073 | 3.9E-03 | 8  | 17.4 |
| P07099 | Epoxide hydrolase 1                                                        | 0.57 | 0.072 | 3.4E-05 | 8  | 15.4 |
| O94911 | ATP-binding cassette sub-family A member 8                                 | 0.57 | 0.551 | 4.4E-01 | 3  | 2.2  |
| Q13813 | Spectrin alpha chain, non-erythrocytic 1                                   | 0.57 | 0.021 | 0.0E+00 | 72 | 32.2 |
| P60660 | Myosin light polypeptide 6                                                 | 0.57 | 0.047 | 6.2E-10 | 9  | 62.3 |
| Q9Y490 | Talin-1                                                                    | 0.56 | 0.044 | 5.0E-11 | 28 | 14.0 |
| Q92556 | Engulfment and cell motility protein 1                                     | 0.55 | 0.177 | 1.9E-01 | 3  | 5.0  |
| P35579 | Myosin-9                                                                   | 0.55 | 0.025 | 0.0E+00 | 59 | 26.9 |
| P29992 | Guanine nucleotide-binding protein subunit alpha-11                        | 0.54 | NA    | NA      | 2  | 6.7  |
| P05090 | Apolipoprotein D                                                           | 0.54 | NA    | NA      | 2  | 12.7 |
| Q14764 | Major vault protein                                                        | 0.53 | 0.127 | 1.7E-02 | 3  | 3.7  |
| O75923 | Dysferlin                                                                  | 0.53 | NA    | NA      | 2  | 1.6  |
| Q8TD19 | Serine/threonine-protein kinase Nek9                                       | 0.53 | NA    | NA      | 2  | 2.2  |
| P0C0L5 | Complement C4-B                                                            | 0.53 | 0.074 | 1.8E-05 | 7  | 3.4  |
| P06756 | Integrin alpha-V                                                           | 0.53 | 0.159 | 2.9E-02 | 3  | 2.3  |
| Q15149 | Plectin                                                                    | 0.52 | 0.030 | 0.0E+00 | 44 | 10.1 |
| P10301 | Ras-related protein R-Ras                                                  | 0.52 | NA    | NA      | 2  | 10.6 |
| P80723 | Brain acid soluble protein 1                                               | 0.51 | 0.095 | 7.7E-04 | 8  | 40.1 |
| Q9Y6N5 | Sulfide:quinone oxidoreductase, mitochondrial                              | 0.51 | 0.268 | 7.7E-02 | 3  | 7.3  |
| P01876 | Ig alpha-1 chain C region                                                  | 0.50 | NA    | NA      | 2  | 4.5  |
| Q14624 | Inter-alpha-trypsin inhibitor heavy chain H4                               | 0.50 | 0.128 | 3.3E-02 | 4  | 5.4  |
| O00159 | Unconventional myosin-1c                                                   | 0.49 | 0.080 | 2.2E-03 | 6  | 5.4  |
| P0CG05 | Ig lambda-2 chain C regions                                                | 0.49 | NA    | NA      | 2  | 27.4 |
| O43301 | Heat shock 70 kDa protein 12A                                              | 0.49 | 0.178 | 1.0E-01 | 4  | 7.3  |
| Q15582 | Transforming growth factor-beta-induced protein ig-h3                      | 0.48 | NA    | NA      | 2  | 3.4  |
| Q16181 | Septin-7                                                                   | 0.47 | 0.083 | 3.8E-05 | 5  | 12.4 |
| Q15019 | Septin-2                                                                   | 0.47 | 0.067 | 5.3E-04 | 3  | 12.2 |
| P42167 | Lamina-associated polypeptide 2, isoforms beta/gamma                       | 0.47 | NA    | NA      | 2  | 4.4  |
| P12111 | Collagen alpha-3(VI) chain                                                 | 0.46 | 0.045 | 5.9E-13 | 31 | 10.5 |
| P12109 | Collagen alpha-1(VI) chain                                                 | 0.46 | 0.080 | 4.8E-06 | 9  | 9.8  |
| P12110 | Collagen alpha-2(VI) chain                                                 | 0.46 | 0.064 | 1.5E-07 | 9  | 9.2  |
| P07355 | Annexin A2                                                                 | 0.46 | 0.035 | 0.0E+00 | 23 | 56.0 |
| P32119 | Peroxisredoxin-2                                                           | 0.45 | 0.070 | 1.4E-06 | 4  | 18.2 |
| P20073 | Annexin A7                                                                 | 0.45 | 0.167 | 5.6E-01 | 3  | 8.6  |
| Q2VIR3 | Putative eukaryotic translation initiation factor 2 subunit 3-like protein | 0.44 | NA    | NA      | 2  | 3.4  |
| Q09666 | Neuroblast differentiation-associated protein AHNAK                        | 0.44 | 0.035 | 0.0E+00 | 68 | 10.4 |
| Q9HBL0 | Tensin-1                                                                   | 0.44 | 0.262 | 3.6E-01 | 4  | 3.9  |
| Q96CW1 | AP-2 complex subunit mu                                                    | 0.44 | NA    | NA      | 2  | 4.1  |
| P06703 | Protein S100-A6                                                            | 0.43 | NA    | NA      | 2  | 16.7 |
| P00747 | Plasminogen                                                                | 0.43 | 0.118 | 5.1E-02 | 5  | 8.4  |
| O43760 | Synaptogyrin-2                                                             | 0.42 | NA    | NA      | 2  | 8.9  |
| P55083 | Microfibril-associated glycoprotein 4                                      | 0.40 | NA    | NA      | 2  | 5.1  |
| P23634 | Plasma membrane calcium-transporting ATPase 4                              | 0.38 | NA    | NA      | 2  | 2.7  |
| P28289 | Tropomodulin-1                                                             | 0.37 | NA    | NA      | 2  | 4.7  |
| P02462 | Collagen alpha-1(IV) chain                                                 | 0.36 | 0.106 | 7.4E-02 | 3  | 2.3  |
| P46939 | Utrophin                                                                   | 0.36 | NA    | NA      | 2  | 0.8  |
| P22105 | Tenascin-X                                                                 | 0.35 | NA    | NA      | 2  | 0.8  |
| Q63HR2 | Tensin-like C1 domain-containing phosphatase                               | 0.34 | NA    | NA      | 2  | 1.5  |
| P35611 | Alpha-adducin                                                              | 0.32 | NA    | NA      | 2  | 4.5  |
| P23229 | Integrin alpha-6                                                           | 0.32 | NA    | NA      | 2  | 1.4  |
| Q9BS40 | Latexin                                                                    | 0.31 | NA    | NA      | 2  | 12.2 |
| P01892 | HLA class I histocompatibility antigen, A-2 alpha chain                    | 0.25 | NA    | NA      | 2  | 6.6  |
| Q92777 | Synapsin-2                                                                 | 0.24 | NA    | NA      | 2  | 4.1  |
| Q16363 | Laminin subunit alpha-4                                                    | 0.24 | 0.278 | 6.6E-02 | 5  | 3.8  |
| O14495 | Lipid phosphate phosphohydrolase 3                                         | 0.23 | NA    | NA      | 2  | 7.1  |
| Q14699 | Raftlin                                                                    | 0.22 | NA    | NA      | 2  | 3.8  |
| P07996 | Thrombospondin-1                                                           | 0.22 | NA    | NA      | 2  | 2.5  |
| P10745 | Retinol-binding protein 3                                                  | 0.22 | NA    | NA      | 2  | 1.8  |
| Q92522 | Histone H1x                                                                | 0.20 | NA    | NA      | 2  | 11.7 |
| Q12805 | EGF-containing fibulin-like extracellular matrix protein 1                 | 0.20 | NA    | NA      | 2  | 3.9  |
| Q03135 | Caveolin-1                                                                 | 0.19 | NA    | NA      | 2  | 11.8 |
| P16157 | Ankyrin-1                                                                  | 0.19 | 0.306 | 2.1E-01 | 3  | 1.8  |
| P11277 | Spectrin beta chain, erythrocytic                                          | 0.18 | 0.455 | 1.1E-01 | 5  | 3.2  |
| P58166 | Inhibin beta E chain                                                       | 0.18 | NA    | NA      | 2  | 5.7  |
| Q9BXN1 | Asporin                                                                    | 0.17 | NA    | NA      | 2  | 5.5  |
| P05186 | Alkaline phosphatase, tissue-nonspecific isozyme                           | 0.15 | 0.424 | 2.6E-01 | 3  | 5.0  |
| P23946 | Chymase                                                                    | 0.14 | 0.260 | 9.5E-02 | 4  | 21.1 |
| P07196 | Neurofilament light polypeptide                                            | 0.14 | NA    | NA      | 2  | 3.7  |
| P24844 | Myosin regulatory light polypeptide 9                                      | 0.10 | NA    | NA      | 2  | 12.2 |
| P02452 | Collagen alpha-1(I) chain                                                  | 0.07 | NA    | NA      | 2  | 2.2  |
| O75369 | Filamin-B                                                                  | 0.41 | 0.115 | 5.9E-04 | 8  | 4.7  |
| Q05682 | Caldesmon                                                                  | 0.41 | 0.031 | 2.2E-04 | 5  | 7.2  |
| Q07954 | Prolow-density lipoprotein receptor-related protein 1                      | 0.40 | 0.049 | 1.7E-04 | 13 | 3.7  |
| P02751 | Fibronectin                                                                | 0.40 | 0.094 | 6.1E-04 | 13 | 7.4  |
| P12814 | Alpha-actinin-1                                                            | 0.40 | 0.074 | 1.6E-08 | 8  | 10.3 |
| P00167 | Cytochrome b5                                                              | 0.37 | 0.108 | 5.9E-04 | 4  | 42.5 |
| P18206 | Vinculin                                                                   | 0.36 | 0.091 | 1.2E-08 | 15 | 16.7 |
| P00450 | Ceruloplasmin                                                              | 0.36 | 0.052 | 7.3E-10 | 9  | 10.4 |
| Q13509 | Tubulin beta-3 chain                                                       | 0.36 | 0.122 | 1.6E-03 | 3  | 6.7  |
| P05362 | Intercellular adhesion molecule 1                                          | 0.36 | 0.123 | 3.2E-02 | 3  | 7.9  |
| P22413 | Ectonucleotide pyrophosphatase/phosphodiesterase family member 1           | 0.33 | 0.057 | 8.8E-04 | 4  | 4.4  |
| P55268 | Laminin subunit beta-2                                                     | 0.33 | 0.085 | 4.1E-06 | 12 | 7.3  |
| P21333 | Filamin-A                                                                  | 0.33 | 0.038 | 0.0E+00 | 53 | 26.3 |
| P50895 | Basal cell adhesion molecule                                               | 0.33 | 0.150 | 4.4E-04 | 4  | 8.9  |
| O15230 | Laminin subunit alpha-5                                                    | 0.31 | 0.107 | 2.4E-05 | 13 | 4.8  |
| P21926 | CD9 antigen                                                                | 0.31 | 0.098 | 9.4E-07 | 3  | 9.6  |
| P06396 | Gelsolin                                                                   | 0.31 | 0.104 | 2.2E-08 | 11 | 14.6 |
| P02654 | Apolipoprotein C-I                                                         | 0.30 | 0.109 | 2.4E-04 | 3  | 24.1 |
| Q969G5 | Protein kinase C delta-binding protein                                     | 0.30 | 0.154 | 2.3E-02 | 3  | 11.5 |
| P02675 | Fibrinogen beta chain                                                      | 0.30 | 0.061 | 1.8E-06 | 9  | 25.3 |
| P01011 | Alpha-1-antichymotrypsin                                                   | 0.29 | 0.126 | 2.4E-05 | 5  | 8.3  |
| Q6NZ12 | Polymerase I and transcript release factor                                 | 0.29 | 0.127 | 1.1E-05 | 6  | 19.2 |
| P68032 | Actin, alpha cardiac muscle 1                                              | 0.29 | 0.235 | 1.0E-03 | 6  | 21.0 |
| Q16555 | Dihydropyrimidinase-related protein 2                                      | 0.28 | 0.106 | 1.8E-07 | 8  | 15.6 |
| P11166 | Solute carrier family 2, facilitated glucose transporter member 1          | 0.28 | 0.079 | 1.1E-04 | 3  | 5.5  |
| P07942 | Laminin subunit beta-1                                                     | 0.27 | 0.201 | 9.3E-03 | 3  | 1.7  |
| Q9NZM1 | Myoferlin                                                                  | 0.26 | 0.243 | 4.1E-02 | 3  | 1.6  |
| P02679 | Fibrinogen gamma chain                                                     | 0.25 | 0.076 | 7.9E-10 | 10 | 22.1 |
| P02549 | Spectrin alpha chain, erythrocytic 1                                       | 0.24 | 0.119 | 4.4E-06 | 7  | 3.7  |

Table S10-Sample UM26

|        |                                                                      |      |       |         |    |      |
|--------|----------------------------------------------------------------------|------|-------|---------|----|------|
| P11047 | Laminin subunit gamma-1                                              | 0.24 | 0.110 | 4.4E-04 | 12 | 7.8  |
| P36269 | Gamma-glutamyltransferase 5                                          | 0.24 | 0.178 | 7.2E-06 | 7  | 14.8 |
| P02686 | Myelin basic protein                                                 | 0.24 | 0.152 | 1.1E-05 | 4  | 14.5 |
| P46821 | Microtubule-associated protein 1B                                    | 0.24 | 0.191 | 2.7E-02 | 6  | 3.0  |
| P07197 | Neurofilament medium polypeptide                                     | 0.22 | 0.122 | 2.7E-02 | 3  | 3.8  |
| O43491 | Band 4.1-like protein 2                                              | 0.22 | 0.150 | 2.0E-03 | 5  | 6.7  |
| P26447 | Protein S100-A4                                                      | 0.22 | 0.118 | 6.1E-04 | 3  | 27.7 |
| P08572 | Collagen alpha-2(IV) chain                                           | 0.21 | 0.170 | 9.7E-05 | 7  | 5.5  |
| P98160 | Basement membrane-specific heparan sulfate proteoglycan core protein | 0.21 | 0.070 | 0.0E+00 | 25 | 6.9  |
| P08294 | Extracellular superoxide dismutase [Cu-Zn]                           | 0.21 | 0.176 | 2.2E-03 | 3  | 15.4 |
| P39060 | Collagen alpha-1(XVIII) chain                                        | 0.21 | 0.105 | 1.3E-09 | 7  | 4.1  |
| P02649 | Apolipoprotein E                                                     | 0.19 | 0.073 | 3.4E-12 | 15 | 46.1 |
| Q14112 | Nidogen-2                                                            | 0.19 | 0.134 | 2.8E-06 | 6  | 4.9  |
| P01008 | Antithrombin-III                                                     | 0.18 | 0.223 | 1.6E-02 | 5  | 12.1 |
| P02760 | Protein AMBP                                                         | 0.18 | 0.116 | 5.5E-06 | 4  | 19.0 |
| Q02952 | A-kinase anchor protein 12                                           | 0.18 | 0.115 | 8.1E-07 | 15 | 10.6 |
| P04083 | Annexin A1                                                           | 0.17 | 0.080 | 8.2E-15 | 10 | 28.3 |
| P09493 | Tropomyosin alpha-1 chain                                            | 0.17 | 0.170 | 1.4E-04 | 5  | 12.0 |
| P39059 | Collagen alpha-1(XV) chain                                           | 0.17 | 0.172 | 2.2E-04 | 3  | 2.2  |
| P01871 | Ig mu chain C region                                                 | 0.17 | 0.199 | 1.8E-04 | 7  | 19.5 |
| P22748 | Carbonic anhydrase 4                                                 | 0.17 | 0.073 | 1.5E-10 | 9  | 29.8 |
| P43320 | Beta-crystallin B2                                                   | 0.16 | 0.157 | 1.8E-02 | 3  | 15.6 |
| O94875 | Sorbin and SH3 domain-containing protein 2                           | 0.16 | 0.338 | 1.7E-02 | 3  | 4.6  |
| P27105 | Erythrocyte band 7 integral membrane protein                         | 0.16 | 0.136 | 1.1E-04 | 6  | 22.9 |
| Q9BXM0 | Periaxin                                                             | 0.15 | 0.279 | 5.1E-03 | 5  | 1.6  |
| Q05707 | Collagen alpha-1(XIV) chain                                          | 0.15 | 0.313 | 3.2E-03 | 5  | 3.0  |
| Q01995 | Transgelin                                                           | 0.15 | 0.097 | 1.3E-02 | 5  | 25.9 |
| Q14195 | Dihydropyrimidinase-related protein 3                                | 0.15 | 0.149 | 1.6E-07 | 9  | 21.6 |
| P60903 | Protein S100-A10                                                     | 0.15 | 0.158 | 1.3E-02 | 3  | 35.1 |
| Q9Y6C2 | EMILIN-1                                                             | 0.15 | 0.163 | 5.9E-04 | 6  | 8.5  |
| P01031 | Complement C5                                                        | 0.15 | 0.160 | 9.8E-06 | 5  | 3.0  |
| P04275 | von Willebrand factor                                                | 0.15 | 0.136 | 3.7E-07 | 9  | 3.6  |
| P02671 | Fibrinogen alpha chain                                               | 0.15 | 0.100 | 2.9E-06 | 9  | 12.5 |
| P07585 | Decorin                                                              | 0.14 | 0.176 | 1.1E-04 | 7  | 19.5 |
| P35749 | Myosin-11                                                            | 0.14 | 0.109 | 1.9E-12 | 28 | 15.5 |
| P14543 | Nidogen-1                                                            | 0.14 | 0.122 | 3.6E-06 | 7  | 6.0  |
| P22352 | Glutathione peroxidase 3                                             | 0.13 | 0.174 | 1.4E-05 | 3  | 11.5 |
| P35555 | Fibrillin-1                                                          | 0.13 | 0.045 | 0.0E+00 | 38 | 14.5 |
| P20774 | Mimecan                                                              | 0.13 | 0.133 | 2.3E-08 | 6  | 16.4 |
| P15088 | Mast cell carboxypeptidase A                                         | 0.12 | 0.499 | 4.0E-02 | 3  | 6.5  |
| P41219 | Peripherin                                                           | 0.12 | 0.215 | 8.9E-05 | 9  | 20.0 |
| P21980 | Protein-glutamine gamma-glutamyltransferase 2                        | 0.12 | 0.098 | 0.0E+00 | 14 | 20.1 |
| Q15661 | Trypsin alpha/beta-1                                                 | 0.12 | 0.131 | 6.3E-10 | 4  | 17.1 |
| P02748 | Complement component C9                                              | 0.11 | 0.160 | 1.9E-05 | 7  | 13.2 |
| Q16518 | Retinoid isomerohydrolase                                            | 0.11 | 0.168 | 1.2E-02 | 3  | 6.2  |
| P21810 | Biglycan                                                             | 0.11 | 0.116 | 1.3E-12 | 7  | 18.2 |
| P10909 | Clusterin                                                            | 0.10 | 0.078 | 0.0E+00 | 14 | 26.9 |
| P02730 | Band 3 anion transport protein                                       | 0.10 | 0.137 | 2.5E-07 | 7  | 9.2  |
| P51888 | Prolargin                                                            | 0.10 | 0.114 | 0.0E+00 | 11 | 30.6 |
| P02743 | Serum amyloid P-component                                            | 0.09 | 0.135 | 1.1E-04 | 7  | 27.8 |
| P35625 | Metalloproteinase inhibitor 3                                        | 0.09 | 0.092 | 7.7E-07 | 3  | 10.4 |
| P51884 | Lumican                                                              | 0.08 | 0.051 | 0.0E+00 | 7  | 20.4 |
| P04004 | Vitronectin                                                          | 0.08 | 0.134 | 1.7E-13 | 8  | 16.3 |
| P08123 | Collagen alpha-2(I) chain                                            | 0.06 | 0.133 | 4.3E-08 | 3  | 3.7  |
| P25189 | Myelin protein P0                                                    | 0.04 | 0.167 | 4.4E-09 | 7  | 27.4 |

Brown denotes change  $\geq 2$  standard deviations (SD) from the mean, yellow denotes change  $\geq 1$  SD and green highlights p values  $\leq 0.05$ . NA, not applicable, n<3 unique peptides.
