# Supplementary material for: iTRAQ Quantitative Proteomic Comparison of Metastatic and Non-Metastatic Uveal Melanoma Tumors
Source: PubMed Central journal article supplement (PMC4549237; doi:10.1371/journal.pone.0135543), 2015-08-25
Supplement: pone.0135543.s011.pdf [file pone.0135543.s011.pdf]

**Supplementary Table S11**  
**Relative Protein Abundance: Sample UM02, Non-Metastatic**  
 Total Proteins Quantified = 239; LogMedian Protein Ratio = 0.13; LogMean Protein Ratio = 0; Standard Deviation = 0.85

| Uni-Prot Accession | Protein                                                                                                        | Ratio UM/Control | Standard Deviation | p value | Unique Peptides | % Sequence Coverage |
|--------------------|----------------------------------------------------------------------------------------------------------------|------------------|--------------------|---------|-----------------|---------------------|
| P09211             | Glutathione S-transferase P                                                                                    | 7.50             | 0.065              | 1.6E-12 | 6               | 39.5                |
| P62937             | Peptidyl-prolyl cis-trans isomerase A                                                                          | 5.90             | 0.091              | 0.0E+00 | 9               | 43.6                |
| P30086             | Phosphatidylethanolamine-binding protein 1                                                                     | 5.69             | 0.083              | 0.0E+00 | 9               | 51.3                |
| P06748             | Nucleophosmin                                                                                                  | 5.51             | 0.075              | 0.0E+00 | 9               | 33.3                |
| P52565             | Rho GDP-dissociation inhibitor 1                                                                               | 5.21             | 0.113              | 1.6E-09 | 4               | 22.5                |
| P06733             | Alpha-enolase                                                                                                  | 5.12             | 0.092              | 4.0E-15 | 13              | 39.6                |
| P23528             | Cofilin-1                                                                                                      | 4.21             | 0.120              | 6.2E-07 | 10              | 55.4                |
| P13645             | Keratin, type I cytoskeletal 10                                                                                | 4.03             | 0.261              | 2.6E-02 | 3               | 5.0                 |
| P02768             | Serum albumin                                                                                                  | 3.71             | 0.024              | 0.0E+00 | 38              | 55.7                |
| P16949             | Stathmin                                                                                                       | 3.54             | 0.148              | 1.2E-04 | 5               | 38.9                |
| P40926             | Malate dehydrogenase, mitochondrial                                                                            | 3.31             | 0.066              | 1.7E-11 | 13              | 50.0                |
| P61604             | 10 kDa heat shock protein, mitochondrial                                                                       | 3.24             | 0.094              | 3.9E-07 | 5               | 41.2                |
| Q92820             | Gamma-glutamyl hydrolase                                                                                       | 3.11             | 0.071              | 1.2E-09 | 3               | 11.0                |
| P23284             | Peptidyl-prolyl cis-trans isomerase B                                                                          | 3.02             | 0.064              | 2.0E-15 | 12              | 54.6                |
| P60174             | Triosephosphate isomerase                                                                                      | 2.95             | 0.099              | 3.0E-04 | 11              | 38.8                |
| Q04760             | Lactoylglutathione lyase                                                                                       | 2.92             | 0.145              | 6.3E-06 | 5               | 27.7                |
| P05387             | 60S acidic ribosomal protein P2                                                                                | 2.78             | 0.120              | 2.5E-04 | 5               | 70.4                |
| P63241             | Eukaryotic translation initiation factor 5A-1                                                                  | 2.77             | 0.144              | 2.7E-02 | 4               | 32.5                |
| P09429             | High mobility group protein B1                                                                                 | 2.76             | 0.046              | 2.0E-15 | 6               | 33.0                |
| P00558             | Phosphoglycerate kinase 1                                                                                      | 2.69             | 0.133              | 1.5E-04 | 4               | 14.6                |
| P04264             | Keratin, type II cytoskeletal 1                                                                                | 2.62             | 0.143              | 2.7E-03 | 4               | 7.1                 |
| P19338             | Nucleolin                                                                                                      | 2.61             | 0.203              | 3.3E-02 | 3               | 4.1                 |
| P07195             | L-lactate dehydrogenase B chain                                                                                | 2.46             | 0.124              | 3.6E-04 | 4               | 12.0                |
| P04792             | Heat shock protein beta-1                                                                                      | 2.36             | 0.062              | 7.9E-10 | 7               | 38.0                |
| P14174             | Macrophage migration inhibitory factor                                                                         | 6.95             | NA                 | NA      | 2               | 17.4                |
| P15531             | Nucleoside diphosphate kinase A                                                                                | 5.36             | NA                 | NA      | 2               | 13.2                |
| P17096             | High mobility group protein HMG-I/HMG-Y                                                                        | 3.77             | NA                 | NA      | 2               | 23.4                |
| Q99497             | Protein DJ-1                                                                                                   | 2.97             | NA                 | NA      | 2               | 16.4                |
| Q9BV36             | Melanophilin                                                                                                   | 2.84             | NA                 | NA      | 2               | 4.7                 |
| P35908             | Keratin, type II cytoskeletal 2 epidermal                                                                      | 2.76             | NA                 | NA      | 2               | 3.0                 |
| Q01469             | Fatty acid-binding protein, epidermal                                                                          | 2.50             | NA                 | NA      | 2               | 11.9                |
| P12955             | Xaa-Pro dipeptidase                                                                                            | 2.49             | NA                 | NA      | 2               | 5.3                 |
| P62158             | Calmodulin                                                                                                     | 2.41             | NA                 | NA      | 2               | 22.1                |
| P63104             | 14-3-3 protein zeta/delta                                                                                      | 2.39             | 0.234              | 7.9E-02 | 4               | 21.2                |
| O75368             | SH3 domain-binding glutamic acid-rich-like protein                                                             | 2.31             | 0.130              | 3.5E-02 | 3               | 32.5                |
| P09651             | Heterogeneous nuclear ribonucleoprotein A1                                                                     | 2.25             | 0.079              | 9.0E-12 | 6               | 18.5                |
| P08238             | Heat shock protein HSP 90-beta                                                                                 | 2.08             | 0.099              | 1.0E-04 | 5               | 7.7                 |
| P31948             | Stress-induced-phosphoprotein 1                                                                                | 2.04             | 0.252              | 1.0E-01 | 4               | 7.2                 |
| P00338             | L-lactate dehydrogenase A chain                                                                                | 2.03             | 0.074              | 1.5E-04 | 3               | 7.2                 |
| P29401             | Transketolase                                                                                                  | 2.03             | 0.155              | 4.1E-02 | 11              | 19.4                |
| P50213             | Isocitrate dehydrogenase [NAD] subunit alpha, mitochondrial                                                    | 2.01             | NA                 | NA      | 2               | 5.5                 |
| P16070             | CD44 antigen                                                                                                   | 2.00             | 0.143              | 5.8E-03 | 8               | 10.9                |
| P07108             | Acyl-CoA-binding protein                                                                                       | 1.99             | NA                 | NA      | 2               | 27.6                |
| P99999             | Cytochrome c                                                                                                   | 1.91             | 0.131              | 1.2E-03 | 4               | 39.0                |
| P07910             | Heterogeneous nuclear ribonucleoproteins C1/C2                                                                 | 1.90             | 0.590              | 2.4E-01 | 3               | 11.8                |
| P08670             | Vimentin                                                                                                       | 1.90             | 0.021              | 0.0E+00 | 33              | 66.5                |
| P07237             | Protein disulfide-isomerase                                                                                    | 1.89             | 0.044              | 1.1E-08 | 10              | 20.3                |
| P14618             | Pyruvate kinase PKM                                                                                            | 1.83             | 0.229              | 3.0E-03 | 7               | 14.5                |
| P62263             | 40S ribosomal protein S14                                                                                      | 1.80             | NA                 | NA      | 2               | 15.9                |
| Q00796             | Sorbitol dehydrogenase                                                                                         | 1.78             | NA                 | NA      | 2               | 7.3                 |
| P06454             | Prothymosin alpha                                                                                              | 1.77             | NA                 | NA      | 2               | 20.7                |
| P18669             | Phosphoglycerate mutase 1                                                                                      | 1.77             | 0.052              | 9.1E-11 | 3               | 15.4                |
| P08758             | Annexin A5                                                                                                     | 1.75             | 0.083              | 6.6E-06 | 12              | 32.8                |
| P30044             | Peroxisome oxidin-5, mitochondrial                                                                             | 1.73             | NA                 | NA      | 2               | 8.9                 |
| P30101             | Protein disulfide-isomerase A3                                                                                 | 1.72             | 0.072              | 3.8E-06 | 14              | 25.0                |
| Q06830             | Peroxisome oxidin-1                                                                                            | 1.71             | 0.042              | 3.7E-13 | 9               | 51.8                |
| Q9H0U4             | Ras-related protein Rab-1B                                                                                     | 1.70             | NA                 | NA      | 2               | 11.4                |
| Q08380             | Galectin-3-binding protein                                                                                     | 1.68             | NA                 | NA      | 2               | 5.6                 |
| P49189             | 4-trimethylaminobutylaldehyde dehydrogenase                                                                    | 1.68             | NA                 | NA      | 2               | 4.9                 |
| P29966             | Myristoylated alanine-rich C-kinase substrate                                                                  | 1.67             | NA                 | NA      | 2               | 5.4                 |
| P36873             | Serine/threonine-protein phosphatase PP1-gamma catalytic subunit                                               | 1.66             | NA                 | NA      | 2               | 6.2                 |
| P61313             | 60S ribosomal protein L15                                                                                      | 1.65             | NA                 | NA      | 2               | 11.3                |
| P02787             | Serotransferrin                                                                                                | 1.65             | 0.090              | 1.3E-03 | 5               | 8.6                 |
| P62851             | 40S ribosomal protein S25                                                                                      | 1.63             | NA                 | NA      | 2               | 15.2                |
| P30041             | Peroxisome oxidin-6                                                                                            | 1.60             | 0.326              | 2.2E-01 | 3               | 12.9                |
| P25398             | 40S ribosomal protein S12                                                                                      | 1.60             | 0.095              | 8.4E-04 | 3               | 25.0                |
| P21796             | Voltage-dependent anion-selective channel protein 1                                                            | 1.58             | 0.081              | 3.0E-03 | 4               | 17.7                |
| P26373             | 60S ribosomal protein L13                                                                                      | 1.57             | NA                 | NA      | 2               | 10.0                |
| P35232             | Prohibitin                                                                                                     | 1.56             | 0.101              | 1.9E-03 | 7               | 27.6                |
| P04406             | Glyceraldehyde-3-phosphate dehydrogenase                                                                       | 1.56             | 0.103              | 5.4E-06 | 8               | 31.0                |
| P10809             | 60 kDa heat shock protein, mitochondrial                                                                       | 1.55             | 0.092              | 7.3E-04 | 10              | 18.3                |
| P20674             | Cytochrome c oxidase subunit 5A, mitochondrial                                                                 | 1.54             | NA                 | NA      | 2               | 20.7                |
| P62906             | 60S ribosomal protein L10a                                                                                     | 1.54             | 0.115              | 7.2E-02 | 3               | 18.4                |
| P63244             | Guanine nucleotide-binding protein subunit beta-2-like 1                                                       | 1.50             | NA                 | NA      | 2               | 7.6                 |
| P0CW22             | 40S ribosomal protein S17-like                                                                                 | 1.50             | NA                 | NA      | 2               | 16.3                |
| Q13185             | Chromobox protein homolog 3                                                                                    | 1.50             | NA                 | NA      | 2               | 14.8                |
| P61088             | Ubiquitin-conjugating enzyme E2 N                                                                              | 1.50             | NA                 | NA      | 2               | 11.2                |
| P78417             | Glutathione S-transferase omega-1                                                                              | 1.50             | NA                 | NA      | 2               | 7.5                 |
| P35637             | RNA-binding protein FUS                                                                                        | 1.48             | NA                 | NA      | 2               | 6.3                 |
| P39019             | 40S ribosomal protein S19                                                                                      | 1.48             | 0.031              | 7.2E-08 | 4               | 23.4                |
| P46783             | 40S ribosomal protein S10                                                                                      | 1.47             | NA                 | NA      | 2               | 14.5                |
| P36957             | Dihydrolypolysine-residue succinyltransferase component of 2-oxoglutarate dehydrogenase complex, mitochondrial | 1.46             | NA                 | NA      | 2               | 5.5                 |
| P50914             | 60S ribosomal protein L14                                                                                      | 1.43             | NA                 | NA      | 2               | 11.2                |
| P51149             | Ras-related protein Rab-7a                                                                                     | 1.42             | NA                 | NA      | 2               | 11.6                |
| P62277             | 40S ribosomal protein S13                                                                                      | 1.42             | NA                 | NA      | 2               | 11.3                |
| P10599             | Thioredoxin                                                                                                    | 1.41             | NA                 | NA      | 2               | 20.0                |
| P40967             | Melanocyte protein PMEL                                                                                        | 1.40             | NA                 | NA      | 2               | 3.3                 |
| Q14956             | Transmembrane glycoprotein NMB                                                                                 | 1.40             | 0.083              | 2.9E-04 | 3               | 5.8                 |
| Q99536             | Synaptic vesicle membrane protein VAT-1 homolog                                                                | 1.39             | 0.081              | 5.0E-04 | 6               | 20.4                |
| O60814             | Histone H2B type 1-K                                                                                           | 1.39             | NA                 | NA      | 2               | 7.9                 |
| P22392             | Nucleoside diphosphate kinase B                                                                                | 1.38             | NA                 | NA      | 2               | 10.5                |
| P07339             | Cathepsin D                                                                                                    | 1.38             | 0.056              | 1.2E-02 | 3               | 7.3                 |
| P62424             | 60S ribosomal protein L7a                                                                                      | 1.38             | NA                 | NA      | 2               | 9.4                 |
| O00148             | ATP-dependent RNA helicase DDX39A                                                                              | 1.37             | NA                 | NA      | 2               | 5.2                 |
| P06744             | Glucose-6-phosphate isomerase                                                                                  | 1.36             | NA                 | NA      | 2               | 4.5                 |
| P51572             | B-cell receptor-associated protein 31                                                                          | 1.35             | 0.112              | 4.8E-02 | 5               | 23.2                |
| P01859             | Ig gamma-2 chain C region                                                                                      | 1.34             | 0.051              | 2.4E-03 | 3               | 11.0                |
| P08107             | Heat shock 70 kDa protein 1A/1B                                                                                | 1.34             | 0.043              | 4.5E-06 | 10              | 18.3                |
| P10412             | Histone H1.4                                                                                                   | 1.32             | 0.030              | 1.4E-08 | 4               | 15.5                |
| O14773             | Tripeptidyl-peptidase 1                                                                                        | 1.31             | 0.028              | 2.3E-07 | 3               | 7.5                 |
| P38646             | Stress-70 protein, mitochondrial                                                                               | 1.28             | 0.086              | 1.3E-02 | 8               | 13.7                |
| P09382             | Galectin-1                                                                                                     | 1.27             | 0.035              | 4.8E-06 | 4               | 31.9                |
| P69905             | Hemoglobin subunit alpha                                                                                       | 1.27             | 0.034              | 1.6E-05 | 6               | 58.5                |
| P45880             | Voltage-dependent anion-selective channel protein 2                                                            | 1.27             | 0.034              | 5.1E-03 | 3               | 8.8                 |

Table S11-Sample UM02

|        |                                                         |      |       |         |    |      |
|--------|---------------------------------------------------------|------|-------|---------|----|------|
| P04075 | Fructose-bisphosphate aldolase A                        | 1.26 | 0.209 | 6.2E-02 | 8  | 26.9 |
| P10606 | Cytochrome c oxidase subunit 5B, mitochondrial          | 1.24 | 0.056 | 3.2E-01 | 3  | 24.0 |
| P68871 | Hemoglobin subunit beta                                 | 1.24 | 0.220 | 1.7E-02 | 6  | 51.0 |
| P22626 | Heterogeneous nuclear ribonucleoproteins A2/B1          | 1.23 | 0.044 | 3.2E-03 | 8  | 22.9 |
| P37802 | Transgelin-2                                            | 1.23 | NA    | NA      | 2  | 10.1 |
| Q8NFI4 | Putative protein FAM10A5                                | 1.23 | NA    | NA      | 2  | 4.6  |
| P62258 | 14-3-3 protein epsilon                                  | 1.22 | 0.538 | 5.0E-01 | 3  | 12.2 |
| Q14103 | Heterogeneous nuclear ribonucleoprotein D0              | 1.21 | NA    | NA      | 2  | 6.2  |
| P15880 | 40S ribosomal protein S2                                | 1.20 | NA    | NA      | 2  | 7.8  |
| P09533 | Cell division control protein 42 homolog                | 1.20 | NA    | NA      | 2  | 9.9  |
| Q9UHQ9 | NADH-cytochrome b5 reductase 1                          | 1.18 | 0.266 | 4.5E-01 | 4  | 16.1 |
| P09497 | Clathrin light chain B                                  | 1.17 | NA    | NA      | 2  | 8.3  |
| P11216 | Glycogen phosphorylase, brain form                      | 1.17 | NA    | NA      | 2  | 3.0  |
| P12236 | ADP/ATP translocase 3                                   | 1.15 | 0.095 | 9.0E-02 | 8  | 23.2 |
| P0C0S5 | Histone H2A.Z                                           | 1.14 | NA    | NA      | 2  | 18.8 |
| Q5VTE0 | Putative elongation factor 1-alpha-like 3               | 1.14 | 0.155 | 1.4E-01 | 4  | 7.8  |
| Q99623 | Prohibitin-2                                            | 1.12 | 0.185 | 3.1E-01 | 4  | 18.1 |
| P00505 | Aspartate aminotransferase, mitochondrial               | 1.12 | NA    | NA      | 2  | 6.0  |
| P0CG47 | Polyubiquitin-B                                         | 1.11 | 0.280 | 1.1E-01 | 6  | 27.1 |
| P49411 | Elongation factor Tu, mitochondrial                     | 1.09 | 0.588 | 7.3E-01 | 5  | 14.2 |
| P06703 | Protein S100-A6                                         | 1.09 | NA    | NA      | 2  | 16.7 |
| P01857 | Ig gamma-1 chain C region                               | 1.08 | 0.196 | 1.8E-01 | 7  | 30.3 |
| P27797 | Calreticulin                                            | 1.06 | NA    | NA      | 2  | 5.8  |
| P06576 | ATP synthase subunit beta, mitochondrial                | 1.05 | 0.130 | 2.6E-01 | 11 | 29.5 |
| P0CG05 | Ig lambda-b2 chain C regions                            | 1.05 | NA    | NA      | 2  | 23.6 |
| P51991 | Heterogeneous nuclear ribonucleoprotein A3              | 1.05 | 0.196 | 5.5E-01 | 4  | 14.3 |
| P02647 | Apolipoprotein A-I                                      | 1.04 | 0.438 | 6.7E-01 | 3  | 11.6 |
| P61978 | Heterogeneous nuclear ribonucleoprotein K               | 1.03 | 0.608 | 7.9E-01 | 3  | 8.0  |
| P25705 | ATP synthase subunit alpha, mitochondrial               | 1.02 | 0.238 | 6.5E-01 | 7  | 16.8 |
| Q9UHD8 | Septin-9                                                | 1.02 | 0.274 | 8.8E-01 | 3  | 6.7  |
| P62701 | 40S ribosomal protein S4, X isoform                     | 1.02 | 0.696 | 7.5E-01 | 3  | 9.5  |
| P06753 | Tropomyosin alpha-3 chain                               | 1.01 | NA    | NA      | 2  | 8.4  |
| O75964 | ATP synthase subunit g, mitochondrial                   | 1.01 | NA    | NA      | 2  | 27.2 |
| P26641 | Elongation factor 1-gamma                               | 1.00 | NA    | NA      | 2  | 6.6  |
| P02511 | Alpha-crystallin B chain                                | 1.00 | 0.133 | 9.6E-01 | 6  | 35.4 |
| P52272 | Heterogeneous nuclear ribonucleoprotein M               | 0.98 | NA    | NA      | 2  | 2.7  |
| P13987 | CD59 glycoprotein                                       | 0.97 | NA    | NA      | 2  | 15.6 |
| Q00325 | Phosphate carrier protein, mitochondrial                | 0.97 | 1.418 | 7.9E-01 | 4  | 11.3 |
| P12956 | X-ray repair cross-complementing protein 6              | 0.97 | 0.924 | 6.9E-01 | 3  | 5.6  |
| P61247 | 40S ribosomal protein S3a                               | 0.94 | NA    | NA      | 2  | 8.3  |
| P02545 | Prelamin-A/C                                            | 0.92 | 0.155 | 7.8E-02 | 28 | 45.2 |
| P11142 | Heat shock cognate 71 kDa protein                       | 0.92 | 0.054 | 1.3E-01 | 6  | 11.0 |
| P04179 | Superoxide dismutase [Mn], mitochondrial                | 0.92 | NA    | NA      | 2  | 9.9  |
| P30048 | Thioredoxin-dependent peroxide reductase, mitochondrial | 0.90 | NA    | NA      | 2  | 10.2 |
| Q9H361 | Polyadenylate-binding protein 3                         | 0.89 | 1.045 | 7.6E-01 | 4  | 8.6  |
| P67936 | Tropomyosin alpha-4 chain                               | 0.89 | 0.232 | 3.3E-01 | 3  | 13.7 |
| P27824 | Calnexin                                                | 0.89 | 0.456 | 1.9E-01 | 8  | 17.4 |
| Q9Y3U8 | 60S ribosomal protein L36                               | 0.86 | NA    | NA      | 2  | 21.9 |
| O75367 | Core histone macro-H2A.1                                | 0.86 | 0.109 | 2.3E-01 | 3  | 11.8 |
| O43707 | Alpha-actinin-4                                         | 0.85 | NA    | NA      | 2  | 3.1  |
| P01009 | Alpha-1-antitrypsin                                     | 0.85 | 0.055 | 7.9E-03 | 6  | 15.8 |
| P68371 | Tubulin beta-4B chain                                   | 0.84 | 0.050 | 6.2E-03 | 3  | 10.6 |
| P18124 | 60S ribosomal protein L7                                | 0.84 | NA    | NA      | 2  | 8.5  |
| P11021 | 78 kDa glucose-regulated protein                        | 0.84 | 0.085 | 4.9E-02 | 12 | 21.1 |
| Q15149 | Plectin                                                 | 0.84 | 0.143 | 1.6E-01 | 6  | 1.1  |
| P13671 | Complement component C6                                 | 0.83 | NA    | NA      | 2  | 1.8  |
| P17858 | ATP-dependent 6-phosphofructokinase, liver type         | 0.83 | NA    | NA      | 2  | 4.5  |
| P62805 | Histone H4                                              | 0.82 | 0.038 | 2.3E-05 | 7  | 52.4 |
| P07437 | Tubulin beta chain                                      | 0.79 | 0.078 | 1.6E-02 | 3  | 10.6 |
| P09525 | Annexin A4                                              | 0.79 | 0.068 | 2.9E-02 | 3  | 6.9  |
| P06396 | Gelsolin                                                | 0.78 | 0.086 | 2.8E-02 | 4  | 5.5  |
| O00264 | Membrane-associated progesterone receptor component 1   | 0.77 | 0.089 | 8.3E-02 | 3  | 15.4 |
| P24539 | ATP synthase F(0) complex subunit B1, mitochondrial     | 0.77 | NA    | NA      | 2  | 9.0  |
| Q16181 | Septin-7                                                | 0.77 | NA    | NA      | 2  | 4.3  |
| P26038 | Moesin                                                  | 0.77 | 0.112 | 1.1E-02 | 7  | 12.5 |
| Q16695 | Histone H3.1t                                           | 0.73 | 0.048 | 6.2E-04 | 4  | 21.3 |
| P22695 | Cytochrome b-c1 complex subunit 2, mitochondrial        | 0.71 | 0.081 | 2.2E-02 | 3  | 10.8 |
| P55072 | Transitional endoplasmic reticulum ATPase               | 0.70 | 0.052 | 3.3E-03 | 3  | 4.0  |
| Q00610 | Clathrin heavy chain 1                                  | 0.69 | 0.098 | 2.8E-02 | 5  | 3.8  |
| Q03252 | Lamin-B2                                                | 0.67 | NA    | NA      | 2  | 2.8  |
| Q9NQC3 | Reticulon-4                                             | 0.66 | NA    | NA      | 2  | 2.3  |
| P06899 | Histone H2B type 1-J                                    | 0.66 | NA    | NA      | 2  | 7.9  |
| P08133 | Annexin A6                                              | 0.65 | 0.052 | 1.9E-08 | 18 | 30.6 |
| P17931 | Galectin-3                                              | 0.64 | 0.058 | 5.3E-06 | 4  | 21.2 |
| Q05682 | Caldesmon                                               | 0.64 | NA    | NA      | 2  | 2.5  |
| P00387 | NADH-cytochrome b5 reductase 3                          | 0.63 | NA    | NA      | 2  | 11.6 |
| Q9BQE3 | Tubulin alpha-1C chain                                  | 0.63 | 0.037 | 3.4E-10 | 11 | 27.2 |
| Q09666 | Neuroblast differentiation-associated protein AHNAK     | 0.63 | 0.031 | 2.2E-10 | 8  | 0.8  |
| Q16555 | Dihydropyrimidinase-related protein 2                   | 0.62 | 0.086 | 9.9E-03 | 5  | 12.9 |
| O75131 | Copine-3                                                | 0.60 | NA    | NA      | 2  | 3.4  |
| P01024 | Complement C3                                           | 0.58 | NA    | NA      | 2  | 1.2  |
| P09493 | Tropomyosin alpha-1 chain                               | 0.57 | NA    | NA      | 2  | 8.8  |
| P02679 | Fibrinogen gamma chain                                  | 0.57 | 0.728 | 3.5E-01 | 3  | 8.2  |
| P07099 | Epoxide hydrolase 1                                     | 0.56 | NA    | NA      | 2  | 5.9  |
| P14625 | Endoplasmin                                             | 0.55 | 0.008 | 4.0E-04 | 5  | 7.0  |
| P60660 | Myosin light polypeptide 6                              | 0.54 | 0.038 | 4.0E-10 | 7  | 58.3 |
| P11047 | Laminin subunit gamma-1                                 | 0.49 | NA    | NA      | 2  | 1.7  |
| P02675 | Fibrinogen beta chain                                   | 0.47 | NA    | NA      | 2  | 4.5  |
| O14950 | Myosin regulatory light chain 12B                       | 0.45 | NA    | NA      | 2  | 12.2 |
| P60709 | Actin, cytoplasmic 1                                    | 0.45 | 0.042 | 1.6E-06 | 4  | 21.1 |
| P21333 | Filamin-A                                               | 0.45 | 0.112 | 1.0E-05 | 15 | 8.1  |
| P07355 | Annexin A2                                              | 0.44 | 0.034 | 0.0E+00 | 18 | 58.1 |
| Q13813 | Spectrin alpha chain, non-erythrocytic 1                | 0.44 | 0.056 | 1.6E-11 | 23 | 12.8 |
| P35579 | Myosin-9                                                | 0.44 | 0.068 | 3.1E-07 | 22 | 12.6 |
| P68032 | Actin, alpha cardiac muscle 1                           | 0.43 | NA    | NA      | 2  | 12.2 |
| P22748 | Carbonic anhydrase 4                                    | 0.43 | NA    | NA      | 2  | 6.4  |
| Q6NZ12 | Polymerase I and transcript release factor              | 0.38 | NA    | NA      | 2  | 7.4  |
| Q14195 | Dihydropyrimidinase-related protein 3                   | 0.28 | NA    | NA      | 2  | 4.6  |
| P39060 | Collagen alpha-1(XVIII) chain                           | 0.28 | NA    | NA      | 2  | 1.5  |
| O15230 | Laminin subunit alpha-5                                 | 0.27 | NA    | NA      | 2  | 0.9  |
| P36269 | Gamma-glutamyltransferase 5                             | 0.27 | NA    | NA      | 2  | 4.1  |
| P02760 | Protein AMBP                                            | 0.26 | NA    | NA      | 2  | 7.1  |
| P21926 | CD9 antigen                                             | 0.25 | NA    | NA      | 2  | 7.5  |
| P04275 | von Willebrand factor                                   | 0.25 | 0.195 | 5.8E-02 | 3  | 1.2  |
| P02452 | Collagen alpha-1(I) chain                               | 0.08 | NA    | NA      | 2  | 2.2  |
| P12109 | Collagen alpha-1(VI) chain                              | 0.43 | 0.145 | 8.5E-04 | 3  | 4.1  |
| Q01082 | Spectrin beta chain, non-erythrocytic 1                 | 0.42 | 0.080 | 5.6E-07 | 11 | 5.5  |
| P04899 | Guanine nucleotide-binding protein G(i) subunit alpha-2 | 0.41 | 0.168 | 1.5E-02 | 3  | 9.9  |
| P02649 | Apolipoprotein E                                        | 0.38 | 0.075 | 7.8E-08 | 10 | 34.1 |
| Q9Y490 | Talin-1                                                 | 0.38 | 0.081 | 1.1E-03 | 3  | 1.1  |

Table S11-Sample UM02

|        |                                                                      |      |       |         |    |      |
|--------|----------------------------------------------------------------------|------|-------|---------|----|------|
| P12111 | Collagen alpha-3(VI) chain                                           | 0.37 | 0.135 | 2.0E-03 | 4  | 1.5  |
| P32119 | Peroxiredoxin-2                                                      | 0.37 | 0.169 | 7.8E-03 | 3  | 17.7 |
| P01011 | Alpha-1-antichymotrypsin                                             | 0.36 | 0.079 | 2.3E-03 | 3  | 6.6  |
| P01871 | Ig mu chain C region                                                 | 0.33 | 0.115 | 7.4E-06 | 5  | 14.8 |
| P04083 | Annexin A1                                                           | 0.32 | 0.166 | 6.3E-04 | 8  | 23.1 |
| P98160 | Basement membrane-specific heparan sulfate proteoglycan core protein | 0.29 | 0.159 | 1.2E-04 | 9  | 2.7  |
| P02749 | Beta-2-glycoprotein 1                                                | 0.29 | 0.120 | 5.3E-03 | 3  | 9.3  |
| P02730 | Band 3 anion transport protein                                       | 0.29 | 0.123 | 1.3E-02 | 3  | 4.5  |
| P35749 | Myosin-11                                                            | 0.27 | 0.118 | 1.2E-04 | 8  | 5.1  |
| P22352 | Glutathione peroxidase 3                                             | 0.25 | 0.090 | 1.2E-02 | 3  | 16.4 |
| Q15661 | Tryptase alpha/beta-1                                                | 0.23 | 0.151 | 3.6E-05 | 4  | 15.6 |
| P21980 | Protein-glutamine gamma-glutamyltransferase 2                        | 0.23 | 0.132 | 1.2E-05 | 8  | 12.2 |
| P51888 | Prolargin                                                            | 0.22 | 0.052 | 0.0E+00 | 10 | 30.9 |
| P35555 | Fibrillin-1                                                          | 0.18 | 0.066 | 0.0E+00 | 21 | 7.6  |
| P04004 | Vitronectin                                                          | 0.18 | 0.110 | 6.3E-09 | 7  | 16.1 |
| P35625 | Metalloproteinase inhibitor 3                                        | 0.18 | 0.137 | 1.9E-04 | 4  | 15.6 |
| P02671 | Fibrinogen alpha chain                                               | 0.18 | 0.142 | 3.8E-03 | 3  | 4.3  |
| P51884 | Lumican                                                              | 0.16 | 0.068 | 0.0E+00 | 9  | 29.0 |
| P20774 | Mimectan                                                             | 0.16 | 0.130 | 2.1E-08 | 5  | 14.1 |
| P25189 | Myelin protein P0                                                    | 0.15 | 0.095 | 6.1E-10 | 5  | 17.7 |
| P21810 | Biglycan                                                             | 0.15 | 0.080 | 0.0E+00 | 9  | 30.7 |
| P02748 | Complement component C9                                              | 0.14 | 0.069 | 5.5E-06 | 4  | 7.9  |
| P10909 | Clusterin                                                            | 0.14 | 0.082 | 4.2E-14 | 8  | 17.6 |
| P02743 | Serum amyloid P-component                                            | 0.11 | 0.211 | 3.6E-04 | 3  | 13.0 |
| P08123 | Collagen alpha-2(I) chain                                            | 0.10 | 0.226 | 7.1E-05 | 3  | 3.2  |

Brown denotes change  $\geq 2$  standard deviations (SD) from the mean, yellow denotes change  $\geq 1$  SD and green highlights p values  $\leq 0.05$ . NA, not applicable, n<3 unique peptides.
