# Supplementary material for: iTRAQ Quantitative Proteomic Comparison of Metastatic and Non-Metastatic Uveal Melanoma Tumors
Source: PubMed Central journal article supplement (PMC4549237; doi:10.1371/journal.pone.0135543), 2015-08-25
Supplement: pone.0135543.s012.pdf [file pone.0135543.s012.pdf]

**Supplementary Table S12**  
**Relative Protein Abundance: Sample UM09, Metastatic**

Total Proteins Quantified = 250; LogMedian Protein Ratio = 0.14; LogMean Protein Ratio = 0; Standard Deviation = 0.81

| Uni-Prot Accession | Protein                                                       | Ratio UM/Control | Standard Deviation | p value | Unique Peptides | % Sequence Coverage |
|--------------------|---------------------------------------------------------------|------------------|--------------------|---------|-----------------|---------------------|
| P14174             | Macrophage migration inhibitory factor                        | 8.67             | 0.107              | 2.6E-10 | 2               | 17.4                |
| P06454             | Prothymosin alpha                                             | 6.11             | 0.133              | 1.5E-02 | 2               | 12.6                |
| P62937             | Peptidyl-prolyl cis-trans isomerase A                         | 4.67             | 0.095              | 4.4E-16 | 8               | 41.8                |
| O15400             | Syntaxin-7                                                    | 3.33             | 0.171              | 2.1E-02 | 3               | 13.4                |
| P30086             | Phosphatidylethanolamine-binding protein 1                    | 3.31             | 0.090              | 1.4E-07 | 6               | 34.2                |
| P17096             | High mobility group protein HMG-I/HMG-Y                       | 3.28             | 0.110              | 1.3E-08 | 2               | 23.4                |
| P09651             | Heterogeneous nuclear ribonucleoprotein A1                    | 3.28             | 0.105              | 4.6E-14 | 6               | 18.5                |
| P02768             | Serum albumin                                                 | 3.26             | 0.023              | 0.0E+00 | 34              | 48.8                |
| P00338             | L-lactate dehydrogenase A chain                               | 3.18             | 0.082              | 5.9E-05 | 4               | 13.0                |
| P00558             | Phosphoglycerate kinase 1                                     | 3.17             | 0.130              | 1.7E-05 | 7               | 20.1                |
| P06748             | Nucleophosmin                                                 | 3.09             | 0.077              | 3.8E-10 | 7               | 23.8                |
| P63104             | 14-3-3 protein zeta/delta                                     | 2.80             | 0.189              | 1.6E-02 | 5               | 26.1                |
| P06733             | Alpha-enolase                                                 | 2.73             | 0.100              | 9.1E-08 | 8               | 19.8                |
| P16070             | CD44 antigen                                                  | 2.71             | 0.195              | 9.4E-04 | 8               | 12.0                |
| P07900             | Heat shock protein HSP 90-alpha                               | 2.70             | 0.170              | 3.3E-03 | 4               | 5.5                 |
| P22392             | Nucleoside diphosphate kinase B                               | 2.70             | 0.157              | 1.5E-04 | 4               | 30.3                |
| P60174             | Triosephosphate isomerase                                     | 2.66             | 0.206              | 1.0E-03 | 10              | 36.4                |
| P52565             | Rho GDP-dissociation inhibitor 1                              | 2.63             | 0.142              | 1.4E-03 | 3               | 15.2                |
| P08758             | Annexin A5                                                    | 2.62             | 0.065              | 1.6E-14 | 13              | 45.3                |
| P09429             | High mobility group protein B1                                | 2.54             | 0.053              | 3.4E-13 | 4               | 27.0                |
| P04406             | Glyceraldehyde-3-phosphate dehydrogenase                      | 2.45             | 0.052              | 7.8E-07 | 13              | 43.6                |
| P07195             | L-lactate dehydrogenase B chain                               | 2.41             | 0.121              | 7.6E-04 | 3               | 9.3                 |
| Q13510             | Acid ceramidase                                               | 2.38             | 0.253              | 1.8E-02 | 3               | 6.8                 |
| P16403             | Histone H1.2                                                  | 2.38             | 0.038              | 0.0E+00 | 7               | 17.8                |
| P63241             | Eukaryotic translation initiation factor 5A-1                 | 2.36             | 0.129              | 1.1E-02 | 2               | 13.0                |
| P16401             | Histone H1.5                                                  | 2.34             | 0.105              | 4.8E-05 | 3               | 14.6                |
| P08195             | 4F2 cell-surface antigen heavy chain                          | 2.31             | 0.182              | 3.0E-02 | 4               | 9.5                 |
| Q8IVF2             | Protein AHNAK2                                                | 2.29             | 0.225              | 1.5E-02 | 2               | 0.4                 |
| P10599             | Thioredoxin                                                   | 2.27             | 0.084              | 5.3E-05 | 3               | 28.6                |
| P19338             | Nucleolin                                                     | 2.25             | 0.092              | 1.5E-04 | 10              | 13.9                |
| Q9BV36             | Melanophilin                                                  | 2.77             | 0.544              | NA      | 2               | 4.7                 |
| P07686             | Beta-hexosaminidase subunit beta                              | 2.74             | 0.537              | NA      | 2               | 2.9                 |
| P37802             | Transgelin-2                                                  | 2.18             | 0.073              | 2.1E-04 | 3               | 15.1                |
| P62158             | Calmodulin                                                    | 2.17             | 0.047              | 4.9E-08 | 2               | 22.1                |
| P78417             | Glutathione S-transferase omega-1                             | 2.16             | 0.169              | 5.3E-03 | 3               | 13.3                |
| P40926             | Malate dehydrogenase, mitochondrial                           | 2.12             | 0.052              | 1.1E-10 | 10              | 36.4                |
| P23528             | Cofilin-1                                                     | 2.09             | 0.102              | 8.3E-04 | 3               | 18.1                |
| P07910             | Heterogeneous nuclear ribonucleoproteins C1/C2                | 2.06             | 0.080              | 5.6E-04 | 4               | 12.1                |
| Q99798             | Aconitate hydratase, mitochondrial                            | 2.05             | 0.070              | 1.7E-03 | 4               | 7.1                 |
| P08670             | Vimentin                                                      | 2.04             | 0.039              | 0.0E+00 | 30              | 60.3                |
| P14618             | Pyruvate kinase PKM                                           | 2.02             | 0.174              | 3.6E-03 | 8               | 14.5                |
| Q08380             | Galectin-3-binding protein                                    | 2.02             | 0.174              | NA      | 2               | 5.6                 |
| Q5VTE0             | Putative elongation factor 1-alpha-like 3                     | 1.99             | 0.058              | 5.0E-09 | 7               | 14.1                |
| Q99536             | Synaptic vesicle membrane protein VAT-1 homolog               | 1.98             | 0.049              | 2.6E-14 | 8               | 23.9                |
| O14556             | Glyceraldehyde-3-phosphate dehydrogenase, testis-specific     | 1.98             | 0.190              | 1.3E-02 | 3               | 9.8                 |
| P29401             | Transketolase                                                 | 1.97             | 0.170              | 9.7E-03 | 4               | 6.4                 |
| P63244             | Guanine nucleotide-binding protein subunit beta-2-like 1      | 1.96             | 0.063              | 5.8E-05 | 3               | 10.4                |
| P02787             | Serotransferrin                                               | 1.94             | 0.178              | 6.5E-03 | 6               | 8.5                 |
| PODME0             | Protein SETSIP                                                | 1.93             | 0.075              | 2.7E-02 | 2               | 5.3                 |
| P60842             | Eukaryotic initiation factor 4A-I                             | 1.90             | 0.160              | 5.8E-03 | 3               | 10.8                |
| P23526             | Adenosylhomocysteinase                                        | 1.89             | 0.064              | 4.9E-06 | 2               | 6.5                 |
| P08238             | Heat shock protein HSP 90-beta                                | 1.87             | 0.434              | NA      | 2               | 3.2                 |
| Q12906             | Interleukin enhancer-binding factor 3                         | 1.86             | 0.083              | 2.1E-02 | 2               | 3.0                 |
| P04075             | Fructose-bisphosphate aldolase A                              | 1.83             | 0.090              | 2.7E-04 | 12              | 39.0                |
| P61604             | 10 kDa heat shock protein, mitochondrial                      | 1.81             | 0.071              | 2.5E-05 | 4               | 29.4                |
| P05387             | 60S acidic ribosomal protein P2                               | 1.79             | 0.145              | 4.2E-03 | 3               | 25.2                |
| P08865             | 40S ribosomal protein SA                                      | 1.76             | 0.107              | 9.1E-02 | 3               | 15.3                |
| Q13185             | Chromobox protein homolog 3                                   | 1.74             | 0.072              | 4.4E-03 | 2               | 14.8                |
| P21796             | Voltage-dependent anion-selective channel protein 1           | 1.69             | 0.110              | 5.1E-03 | 6               | 22.3                |
| P61978             | Heterogeneous nuclear ribonucleoprotein K                     | 1.67             | 0.086              | 2.2E-02 | 4               | 10.8                |
| O60814             | Histone H2B type 1-K                                          | 1.66             | 0.025              | 0.0E+00 | 2               | 7.9                 |
| P22626             | Heterogeneous nuclear ribonucleoproteins A2/B1                | 1.65             | 0.053              | 2.3E-08 | 9               | 22.9                |
| P02545             | Prelamin-A/C                                                  | 1.65             | 0.030              | 0.0E+00 | 34              | 48.5                |
| P07339             | Cathepsin D                                                   | 1.65             | 0.095              | 5.7E-03 | 4               | 9.2                 |
| Q12905             | Interleukin enhancer-binding factor 2                         | 1.63             | 0.138              | 3.1E-02 | 2               | 6.7                 |
| Q14956             | Transmembrane glycoprotein NMB                                | 1.62             | 0.076              | 2.9E-04 | 3               | 6.5                 |
| P30044             | Peroxisome protein PEX5, mitochondrial                        | 1.61             | 0.094              | 2.8E-03 | 2               | 10.3                |
| P06744             | Glucose-6-phosphate isomerase                                 | 1.60             | 0.203              | 1.0E-01 | 5               | 9.5                 |
| P23284             | Peptidyl-prolyl cis-trans isomerase B                         | 1.59             | 0.100              | 3.6E-04 | 9               | 32.4                |
| P61026             | Ras-related protein Rab-10                                    | 1.59             | 0.081              | 4.6E-02 | 2               | 11.5                |
| Q14103             | Heterogeneous nuclear ribonucleoprotein D0                    | 1.58             | 0.073              | 4.6E-04 | 2               | 6.2                 |
| P06753             | Tropomyosin alpha-3 chain                                     | 1.57             | 15.190             | 2.3E-01 | 2               | 8.4                 |
| P27816             | Microtubule-associated protein 4                              | 1.57             | 0.171              | 1.1E-01 | 5               | 5.4                 |
| P27635             | 60S ribosomal protein L10                                     | 1.57             | 0.034              | 2.2E-04 | 2               | 9.8                 |
| Q14697             | Neutral alpha-glucosidase AB                                  | 1.57             | 0.092              | 3.4E-03 | 3               | 4.9                 |
| Q00839             | Heterogeneous nuclear ribonucleoprotein U                     | 1.56             | 0.239              | 4.0E-01 | 4               | 6.3                 |
| P40967             | Melanocyte protein PMEL                                       | 1.53             | 0.102              | 8.0E-05 | 2               | 3.3                 |
| P54709             | Sodium/potassium-transporting ATPase subunit beta-3           | 1.53             | 0.130              | 5.1E-02 | 2               | 10.4                |
| Q13011             | Delta(3,5)-Delta(2,4)-dienoyl-CoA isomerase, mitochondrial    | 1.50             | 0.098              | 2.7E-02 | 2               | 5.8                 |
| P62249             | 40S ribosomal protein S16                                     | 1.49             | 0.123              | NA      | 2               | 15.1                |
| P62851             | 40S ribosomal protein S25                                     | 1.49             | 0.119              | 2.2E-02 | 3               | 24.0                |
| P11216             | Glycogen phosphorylase, brain form                            | 1.48             | 0.315              | 3.6E-01 | 2               | 3.0                 |
| P26373             | 60S ribosomal protein L13                                     | 1.47             | 0.668              | 3.2E-01 | 4               | 20.4                |
| P39687             | Acidic leucine-rich nuclear phosphoprotein 32 family member A | 1.46             | 0.091              | 8.3E-04 | 2               | 9.6                 |

Table S12-Sample UM09

|        |                                                                          |      |        |         |    |      |
|--------|--------------------------------------------------------------------------|------|--------|---------|----|------|
| P11142 | Heat shock cognate 71 kDa protein                                        | 1.45 | 0.080  | 2.7E-04 | 9  | 16.9 |
| P51991 | Heterogeneous nuclear ribonucleoprotein A3                               | 1.45 | 0.092  | 1.1E-03 | 4  | 14.3 |
| P31040 | Succinate dehydrogenase [ubiquinone] flavoprotein subunit, mitochondrial | 1.44 | 0.108  | 6.0E-02 | 2  | 3.2  |
| P26641 | Elongation factor 1-gamma                                                | 1.44 | 0.110  | 1.7E-02 | 4  | 12.1 |
| P39019 | 40S ribosomal protein S19                                                | 1.42 | 0.064  | 3.2E-03 | 3  | 17.2 |
| P46777 | 60S ribosomal protein L5                                                 | 1.41 | 0.097  | NA      | 2  | 8.8  |
| P18669 | Phosphoglycerate mutase 1                                                | 1.41 | 0.046  | 1.5E-04 | 2  | 15.4 |
| P62753 | 40S ribosomal protein S6                                                 | 1.40 | 0.049  | NA      | 2  | 8.8  |
| P12956 | X-ray repair cross-complementing protein 6                               | 1.39 | 0.109  | 3.6E-02 | 6  | 11.0 |
| P15880 | 40S ribosomal protein S2                                                 | 1.39 | 0.110  | 1.4E-02 | 3  | 11.6 |
| P38646 | Stress-70 protein, mitochondrial                                         | 1.37 | 0.146  | 7.8E-03 | 9  | 17.2 |
| P20700 | Lamin-B1                                                                 | 1.36 | 0.119  | 1.3E-01 | 2  | 3.2  |
| P13639 | Elongation factor 2                                                      | 1.36 | 0.443  | 3.4E-01 | 2  | 3.4  |
| P62857 | 40S ribosomal protein S28                                                | 1.36 | 0.381  | NA      | 2  | 30.4 |
| P22087 | rRNA 2'-O-methyltransferase fibrillar                                    | 1.34 | 0.067  | 8.8E-02 | 2  | 10.3 |
| Q13423 | NAD(P) transhydrogenase, mitochondrial                                   | 1.33 | 0.214  | NA      | 2  | 1.6  |
| Q15084 | Protein disulfide-isomerase A6                                           | 1.33 | 0.022  | 1.2E-02 | 2  | 7.3  |
| P07237 | Protein disulfide-isomerase                                              | 1.30 | 0.076  | 5.1E-03 | 6  | 13.4 |
| P62701 | 40S ribosomal protein S4, X isoform                                      | 1.30 | 0.109  | 6.6E-02 | 2  | 5.7  |
| P30101 | Protein disulfide-isomerase A3                                           | 1.29 | 0.070  | 1.7E-03 | 10 | 22.4 |
| O15173 | Membrane-associated progesterone receptor component 2                    | 1.29 | 0.596  | NA      | 2  | 14.8 |
| P25398 | 40S ribosomal protein S12                                                | 1.28 | 0.245  | 1.1E-01 | 3  | 25.0 |
| O60506 | Heterogeneous nuclear ribonucleoprotein Q                                | 1.27 | 0.074  | 1.2E-01 | 2  | 2.9  |
| P49411 | Elongation factor Tu, mitochondrial                                      | 1.26 | 0.079  | 1.3E-02 | 5  | 13.7 |
| P51149 | Ras-related protein Rab-7a                                               | 1.26 | 0.016  | 5.1E-03 | 2  | 9.7  |
| P0C0S8 | Histone H2A type 1                                                       | 1.26 | 0.047  | 2.2E-03 | 2  | 23.1 |
| P09525 | Annexin A4                                                               | 1.26 | 0.097  | 5.0E-02 | 3  | 6.9  |
| P99999 | Cytochrome c                                                             | 1.24 | 0.356  | 4.3E-01 | 2  | 21.9 |
| P17643 | 5,6-dihydroxyindole-2-carboxylic acid oxidase                            | 1.23 | 0.475  | 4.4E-01 | 5  | 9.5  |
| O75367 | Core histone macro-H2A.1                                                 | 1.22 | 0.599  | 1.2E-01 | 5  | 19.1 |
| P30049 | ATP synthase subunit delta, mitochondrial                                | 1.22 | 0.323  | 3.6E-01 | 2  | 13.7 |
| P10809 | 60 kDa heat shock protein, mitochondrial                                 | 1.22 | 0.411  | 3.8E-01 | 3  | 7.7  |
| P27824 | Calnexin                                                                 | 1.21 | 0.064  | 9.4E-04 | 9  | 17.1 |
| P09382 | Galectin-1                                                               | 1.20 | 0.051  | 1.2E-03 | 4  | 31.9 |
| P52272 | Heterogeneous nuclear ribonucleoprotein M                                | 1.19 | 0.082  | 8.3E-02 | 2  | 2.7  |
| P61247 | 40S ribosomal protein S3a                                                | 1.19 | 7.754  | 6.9E-01 | 3  | 11.7 |
| O43707 | Alpha-actinin-4                                                          | 1.18 | 0.074  | 1.3E-03 | 11 | 17.2 |
| P04439 | HLA class I histocompatibility antigen, A-3 alpha chain                  | 1.17 | 1.510  | NA      | 2  | 6.8  |
| P67936 | Tropomyosin alpha-4 chain                                                | 1.16 | 0.068  | 2.9E-01 | 3  | 12.1 |
| P45880 | Voltage-dependent anion-selective channel protein 2                      | 1.16 | 0.115  | 1.1E-01 | 4  | 15.0 |
| P18124 | 60S ribosomal protein L7                                                 | 1.15 | 41.991 | NA      | 2  | 12.5 |
| P0CG47 | Polyubiquitin-B                                                          | 1.15 | 0.319  | 1.7E-02 | 7  | 29.7 |
| P62906 | 60S ribosomal protein L10a                                               | 1.14 | 0.164  | 3.3E-01 | 3  | 16.1 |
| P14314 | Glucosidase 2 subunit beta                                               | 1.13 | 0.189  | 5.3E-01 | 5  | 9.7  |
| P25705 | ATP synthase subunit alpha, mitochondrial                                | 1.13 | 0.284  | 3.0E-01 | 7  | 17.5 |
| P30041 | Peroxiredoxin-6                                                          | 1.13 | 0.258  | 5.3E-01 | 4  | 16.1 |
| Q71DI3 | Histone H3.2                                                             | 1.10 | 0.319  | 7.1E-02 | 3  | 16.2 |
| P0CG05 | Ig lambda-2 chain C regions                                              | 1.10 | 0.474  | 2.4E-01 | 2  | 23.6 |
| Q9UHD8 | Septin-9                                                                 | 1.10 | 0.131  | 3.2E-01 | 2  | 4.1  |
| Q8NBS9 | Thioredoxin domain-containing protein 5                                  | 1.10 | 0.036  | 2.2E-01 | 2  | 4.4  |
| P11940 | Polyadenylate-binding protein 1                                          | 1.09 | 0.038  | 1.4E-01 | 2  | 4.7  |
| Q86UP2 | Kinetin                                                                  | 1.09 | 4.061  | NA      | 2  | 1.8  |
| P62805 | Histone H4                                                               | 1.08 | 0.065  | 6.2E-02 | 7  | 58.3 |
| P50502 | Hsc70-interacting protein                                                | 1.08 | 0.096  | 3.2E-01 | 2  | 6.5  |
| Q15233 | Non-POU domain-containing octamer-binding protein                        | 1.07 | 1.524  | 7.6E-01 | 2  | 5.1  |
| P35232 | Prohibitin                                                               | 1.07 | 0.252  | 4.2E-01 | 7  | 28.3 |
| O14773 | Tripeptidyl-peptidase 1                                                  | 1.06 | 0.297  | 9.2E-02 | 3  | 7.5  |
| P26038 | Moesin                                                                   | 1.05 | 0.088  | 2.2E-01 | 6  | 6.4  |
| Q99584 | Protein S100-A13                                                         | 1.05 | 1.311  | 3.5E-01 | 2  | 23.5 |
| P51572 | B-cell receptor-associated protein 31                                    | 1.04 | 0.555  | 6.9E-01 | 5  | 23.2 |
| P13987 | CD59 glycoprotein                                                        | 1.03 | 0.234  | 8.3E-01 | 2  | 15.6 |
| P06576 | ATP synthase subunit beta, mitochondrial                                 | 1.02 | 0.299  | 7.5E-01 | 15 | 35.2 |
| P17858 | ATP-dependent 6-phosphofructokinase, liver type                          | 1.01 | 0.637  | 9.1E-01 | 2  | 4.5  |
| P0C0S5 | Histone H2A.Z                                                            | 1.01 | 0.392  | 8.4E-01 | 2  | 18.8 |
| P02652 | Apolipoprotein A-II                                                      | 0.99 | 1.051  | 9.7E-01 | 2  | 11.0 |
| P01859 | Ig gamma-2 chain C region                                                | 0.98 | 0.039  | 5.5E-01 | 2  | 6.1  |
| P31930 | Cytochrome b-c1 complex subunit 1, mitochondrial                         | 0.97 | 1.741  | 9.6E-01 | 2  | 6.5  |
| P23396 | 40S ribosomal protein S3                                                 | 0.96 | 0.181  | 7.5E-01 | 3  | 11.9 |
| P62841 | 40S ribosomal protein S15                                                | 0.96 | 0.525  | 8.9E-01 | 2  | 9.0  |
| Q03252 | Lamin-B2                                                                 | 0.96 | 0.483  | 8.7E-01 | 4  | 5.8  |
| P05141 | ADP/ATP translocase 2                                                    | 0.95 | 0.353  | 6.3E-01 | 6  | 18.1 |
| P02511 | Alpha-crystallin B chain                                                 | 0.94 | 0.223  | 5.0E-01 | 5  | 29.1 |
| P55072 | Transitional endoplasmic reticulum ATPase                                | 0.93 | 0.377  | 4.2E-01 | 3  | 4.6  |
| P09493 | Tropomyosin alpha-1 chain                                                | 0.93 | 1.386  | 7.9E-01 | 3  | 12.0 |
| P14625 | Endoplasmic reticulum chaperone                                          | 0.92 | 0.103  | 3.0E-01 | 7  | 9.0  |
| P06899 | Histone H2B type 1-J                                                     | 0.92 | 0.054  | 9.8E-02 | 2  | 7.9  |
| P01024 | Complement C3                                                            | 0.90 | 0.236  | 5.8E-01 | 3  | 2.0  |
| Q16181 | Septin-7                                                                 | 0.90 | 0.134  | 5.3E-01 | 2  | 4.3  |
| P04792 | Heat shock protein beta-1                                                | 0.89 | 0.150  | 1.2E-01 | 6  | 33.2 |
| P08107 | Heat shock 70 kDa protein 1A/1B                                          | 0.89 | 0.064  | 5.2E-02 | 9  | 16.5 |
| Q02952 | A-kinase anchor protein 12                                               | 0.89 | 0.220  | 3.2E-01 | 8  | 6.2  |
| P11021 | 78 kDa glucose-regulated protein                                         | 0.88 | 0.107  | 2.0E-01 | 10 | 18.5 |
| P07437 | Tubulin beta chain                                                       | 0.88 | 0.060  | 4.2E-03 | 4  | 13.3 |
| P27797 | Calreticulin                                                             | 0.88 | 0.369  | 4.6E-01 | 2  | 6.7  |
| Q00325 | Phosphate carrier protein, mitochondrial                                 | 0.87 | 0.497  | 5.9E-01 | 2  | 7.2  |
| P40939 | Trifunctional enzyme subunit alpha, mitochondrial                        | 0.87 | 0.011  | NA      | 2  | 4.3  |
| P04843 | Dolichyl-diphosphooligosaccharide--protein glycosyltransferase subunit 1 | 0.87 | 0.895  | 6.7E-01 | 2  | 4.1  |
| P01009 | Alpha-1-antitrypsin                                                      | 0.86 | 0.161  | 3.8E-01 | 4  | 11.5 |
| P68371 | Tubulin beta-4B chain                                                    | 0.86 | 0.055  | 6.1E-03 | 3  | 10.6 |
| P60709 | Actin, cytoplasmic 1                                                     | 0.84 | 0.041  | 2.7E-02 | 6  | 24.8 |

Table S12-Sample UM09

|        |                                                                      |      |       |         |    |      |
|--------|----------------------------------------------------------------------|------|-------|---------|----|------|
| P17931 | Galectin-3                                                           | 0.84 | 0.061 | 1.1E-02 | 5  | 24.0 |
| Q06830 | Peroxiredoxin-1                                                      | 0.83 | 0.049 | 4.2E-04 | 7  | 36.7 |
| O14950 | Myosin regulatory light chain 12B                                    | 0.82 | 0.071 | 8.8E-02 | 2  | 12.2 |
| Q00610 | Clathrin heavy chain 1                                               | 0.80 | 0.031 | 2.6E-05 | 8  | 6.1  |
| Q9BQE3 | Tubulin alpha-1C chain                                               | 0.80 | 0.167 | 1.2E-01 | 5  | 13.8 |
| P22695 | Cytochrome b-c1 complex subunit 2, mitochondrial                     | 0.78 | 0.153 | 7.4E-02 | 2  | 7.7  |
| P68032 | Actin, alpha cardiac muscle 1                                        | 0.77 | 0.113 | 4.4E-02 | 2  | 12.2 |
| P13010 | X-ray repair cross-complementing protein 5                           | 0.75 | 0.549 | 4.5E-01 | 2  | 3.0  |
| P00387 | NADH-cytochrome b5 reductase 3                                       | 0.75 | 0.048 | 9.4E-04 | 4  | 12.0 |
| P61769 | Beta-2-microglobulin                                                 | 0.75 | 0.105 | 1.2E-01 | 2  | 16.8 |
| P35580 | Myosin-10                                                            | 0.74 | 0.304 | 4.5E-01 | 3  | 2.0  |
| Q15019 | Septin-2                                                             | 0.73 | 0.135 | 9.2E-02 | 2  | 7.5  |
| P07099 | Epoxide hydrolase 1                                                  | 0.72 | 0.350 | 3.3E-01 | 2  | 5.9  |
| P60660 | Myosin light polypeptide 6                                           | 0.72 | 0.025 | 2.8E-12 | 7  | 58.3 |
| P01857 | Ig gamma-1 chain C region                                            | 0.72 | 0.055 | 1.6E-03 | 5  | 21.2 |
| Q9NQC3 | Reticulon-4                                                          | 0.71 | 0.050 | 3.0E-03 | 2  | 2.3  |
| P08133 | Annexin A6                                                           | 0.70 | 0.076 | 1.1E-04 | 16 | 26.3 |
| P01834 | Ig kappa chain C region                                              | 0.69 | 0.082 | 1.4E-02 | 2  | 33.0 |
| P35579 | Myosin-9                                                             | 0.68 | 0.045 | 8.9E-09 | 36 | 20.5 |
| P02647 | Apolipoprotein A-I                                                   | 0.68 | 0.084 | 6.3E-02 | 2  | 7.1  |
| P12814 | Alpha-actinin-1                                                      | 0.64 | 0.066 | 1.2E-03 | 4  | 5.5  |
| P05023 | Sodium/potassium-transporting ATPase subunit alpha-1                 | 0.63 | 0.112 | 2.4E-02 | 6  | 5.7  |
| P12111 | Collagen alpha-3(VI) chain                                           | 0.60 | 0.062 | 1.7E-02 | 2  | 0.7  |
| P69905 | Hemoglobin subunit alpha                                             | 0.59 | 0.035 | 8.7E-06 | 5  | 38.0 |
| P05556 | Integrin beta-1                                                      | 0.56 | 0.117 | 6.4E-02 | 2  | 3.3  |
| Q15149 | Plectin                                                              | 0.56 | 0.215 | 2.8E-01 | 6  | 1.5  |
| P07355 | Annexin A2                                                           | 0.55 | 0.026 | 0.0E+00 | 23 | 60.8 |
| P32119 | Peroxiredoxin-2                                                      | 0.54 | 0.176 | 1.2E-02 | 4  | 22.2 |
| Q9Y490 | Talin-1                                                              | 0.53 | 0.148 | 1.0E-01 | 5  | 2.4  |
| P21333 | Filamin-A                                                            | 0.53 | 0.036 | 1.8E-15 | 26 | 12.9 |
| Q01082 | Spectrin beta chain, non-erythrocytic 1                              | 0.53 | 0.038 | 2.1E-14 | 17 | 9.1  |
| P07305 | Histone H1.0                                                         | 0.52 | 0.196 | 5.8E-02 | 2  | 10.8 |
| Q09666 | Neuroblast differentiation-associated protein AHNAK                  | 0.52 | 0.023 | 1.3E-10 | 7  | 0.8  |
| Q13813 | Spectrin alpha chain, non-erythrocytic 1                             | 0.51 | 0.043 | 2.2E-16 | 27 | 13.2 |
| P12109 | Collagen alpha-1(VI) chain                                           | 0.51 | 0.088 | 5.2E-03 | 4  | 5.1  |
| O15230 | Laminin subunit alpha-5                                              | 0.50 | 0.072 | 6.3E-04 | 2  | 1.0  |
| P63096 | Guanine nucleotide-binding protein G(i) subunit alpha-1              | 0.50 | 0.174 | 6.3E-02 | 2  | 5.9  |
| P68871 | Hemoglobin subunit beta                                              | 0.49 | 0.023 | 0.0E+00 | 11 | 78.2 |
| P02679 | Fibrinogen gamma chain                                               | 0.45 | 0.478 | 1.8E-01 | 2  | 5.7  |
| P11047 | Laminin subunit gamma-1                                              | 0.38 | 0.484 | 2.9E-01 | 3  | 2.6  |
| P18206 | Vinculin                                                             | 0.37 | 0.575 | NA      | 2  | 2.2  |
| P02462 | Collagen alpha-1(IV) chain                                           | 0.37 | 0.296 | NA      | 2  | 1.7  |
| P39060 | Collagen alpha-1(XVIII) chain                                        | 0.27 | 0.190 | 6.8E-02 | 3  | 2.1  |
| P02730 | Band 3 anion transport protein                                       | 0.24 | 0.184 | 2.8E-01 | 2  | 2.3  |
| Q43491 | Band 4.1-like protein 2                                              | 0.23 | 0.550 | NA      | 2  | 2.2  |
| P01011 | Alpha-1-antitrypsin                                                  | 0.42 | 0.102 | 5.4E-04 | 3  | 7.1  |
| P22748 | Carbonic anhydrase 4                                                 | 0.41 | 0.068 | 7.9E-03 | 2  | 6.4  |
| P02749 | Beta-2-glycoprotein 1                                                | 0.40 | 0.115 | 1.1E-02 | 4  | 13.3 |
| P06396 | Gelsolin                                                             | 0.39 | 0.051 | 2.0E-08 | 6  | 7.9  |
| Q16555 | Dihydropyrimidinase-related protein 2                                | 0.38 | 0.226 | 6.9E-03 | 4  | 7.3  |
| P01871 | Ig mu chain C region                                                 | 0.36 | 0.190 | 4.8E-05 | 4  | 13.1 |
| P02675 | Fibrinogen beta chain                                                | 0.34 | 0.214 | 2.7E-03 | 2  | 4.3  |
| P14543 | Nidogen-1                                                            | 0.32 | 0.096 | 1.1E-02 | 2  | 2.2  |
| P36269 | Gamma-glutamyltransferase 5                                          | 0.31 | 0.238 | 3.2E-02 | 2  | 4.1  |
| P04083 | Annexin A1                                                           | 0.29 | 0.099 | 2.1E-06 | 6  | 18.2 |
| P02649 | Apolipoprotein E                                                     | 0.27 | 0.100 | 3.3E-06 | 9  | 33.8 |
| P63211 | Guanine nucleotide-binding protein G(T) subunit gamma-T1             | 0.26 | 0.091 | 3.8E-03 | 2  | 17.6 |
| P51888 | Prolargin                                                            | 0.24 | 0.056 | 0.0E+00 | 12 | 34.0 |
| P98160 | Basement membrane-specific heparan sulfate proteoglycan core protein | 0.24 | 0.226 | 8.2E-04 | 5  | 1.5  |
| Q15661 | Tryptase alpha/beta-1                                                | 0.23 | 0.215 | 1.2E-04 | 4  | 17.1 |
| P02748 | Complement component C9                                              | 0.22 | 0.087 | 1.6E-04 | 4  | 7.9  |
| P35749 | Myosin-11                                                            | 0.21 | 0.213 | 2.7E-03 | 6  | 4.4  |
| P02760 | Protein AMBP                                                         | 0.21 | 0.059 | 4.2E-03 | 2  | 7.7  |
| P21980 | Protein-glutamine gamma-glutamyltransferase 2                        | 0.18 | 0.074 | 4.3E-09 | 7  | 12.2 |
| P21926 | CD9 antigen                                                          | 0.18 | 0.154 | 2.1E-04 | 2  | 7.5  |
| P21810 | Biglycan                                                             | 0.17 | 0.075 | 2.2E-16 | 9  | 30.7 |
| P51884 | Lumican                                                              | 0.16 | 0.052 | 2.2E-16 | 9  | 29.0 |
| P20774 | Mimecan                                                              | 0.16 | 0.141 | 2.5E-07 | 5  | 14.1 |
| P04004 | Vitronectin                                                          | 0.15 | 0.140 | 1.3E-07 | 6  | 14.6 |
| P35625 | Metalloproteinase inhibitor 3                                        | 0.15 | 0.220 | 2.7E-02 | 3  | 12.8 |
| P10909 | Clusterin                                                            | 0.14 | 0.091 | 1.5E-11 | 9  | 17.6 |
| P02671 | Fibrinogen alpha chain                                               | 0.14 | 0.109 | 1.4E-04 | 2  | 2.3  |
| P35555 | Fibrillin-1                                                          | 0.14 | 0.062 | 0.0E+00 | 15 | 5.4  |
| P25189 | Myelin protein P0                                                    | 0.11 | 0.179 | 1.5E-06 | 5  | 17.7 |
| P08123 | Collagen alpha-2(I) chain                                            | 0.06 | 0.117 | 6.2E-06 | 2  | 2.4  |
| P02743 | Serum amyloid P-component                                            | 0.04 | 0.059 | 3.2E-07 | 2  | 8.5  |

Brown denotes change  $\geq 2$  standard deviations (SD) from the mean, yellow denotes change  $\geq 1$  SD and green highlights p values  $\leq 0.05$ . NA, not applicable, n<3 unique peptides.
