# Supplementary material for: iTRAQ Quantitative Proteomic Comparison of Metastatic and Non-Metastatic Uveal Melanoma Tumors
Source: PubMed Central journal article supplement (PMC4549237; doi:10.1371/journal.pone.0135543), 2015-08-25
Supplement: pone.0135543.s013.pdf [file pone.0135543.s013.pdf]

**Supplementary Table S13**  
**Relative Protein Abundance: Sample UM11, Metastatic**

Total Proteins Quantified = 193; LogMedian Protein Ratio = .11; LogMean ProteinRatio = 0; Standard Deviation = 0.70

| Uni-Prot<br>Accession | Protein                                                                                                           | Ratio<br>UM/Control | Standard<br>Deviation | p value | Unique<br>Peptides | % Sequence<br>Coverage |
|-----------------------|-------------------------------------------------------------------------------------------------------------------|---------------------|-----------------------|---------|--------------------|------------------------|
| P02768                | Serum albumin                                                                                                     | 4.61                | 0.035                 | 0.0E+00 | 33                 | 51.4                   |
| P00558                | Phosphoglycerate kinase 1                                                                                         | 3.91                | 0.092                 | 6.6E-04 | 3                  | 7.9                    |
| P63104                | 14-3-3 protein zeta/delta                                                                                         | 3.66                | 0.117                 | 6.1E-04 | 3                  | 15.5                   |
| P62937                | Peptidyl-prolyl cis-trans isomerase A                                                                             | 3.21                | 0.078                 | 1.3E-11 | 7                  | 41.8                   |
| P08670                | Vimentin                                                                                                          | 2.78                | 0.027                 | 0.0E+00 | 31                 | 61.6                   |
| P06733                | Alpha-enolase                                                                                                     | 2.60                | 0.070                 | 2.4E-06 | 7                  | 14.3                   |
| P02787                | Serotransferrin                                                                                                   | 2.58                | 0.103                 | 4.5E-05 | 3                  | 5.0                    |
| P04406                | Glyceraldehyde-3-phosphate dehydrogenase                                                                          | 2.57                | 0.064                 | 6.6E-11 | 10                 | 36.7                   |
| P06748                | Nucleophosmin                                                                                                     | 2.57                | 0.094                 | 5.0E-05 | 5                  | 14.6                   |
| P08758                | Annexin A5                                                                                                        | 2.53                | 0.049                 | 0.0E+00 | 10                 | 35.0                   |
| P60174                | Triosephosphate isomerase                                                                                         | 2.52                | 0.186                 | 2.4E-02 | 3                  | 13.6                   |
| P07900                | Heat shock protein HSP 90-alpha                                                                                   | 2.50                | 0.125                 | 1.4E-03 | 5                  | 7.7                    |
| P10412                | Histone H1.4                                                                                                      | 2.48                | 0.045                 | 3.8E-15 | 6                  | 15.5                   |
| P07339                | Cathepsin D                                                                                                       | 2.48                | 0.105                 | 1.2E-05 | 4                  | 9.2                    |
| P14618                | Pyruvate kinase PKM                                                                                               | 2.48                | 0.107                 | 1.1E-05 | 6                  | 11.1                   |
| Q13423                | NAD(P) transhydrogenase, mitochondrial                                                                            | 2.46                | 0.037                 | 5.0E-05 | 4                  | 3.3                    |
| P40926                | Malate dehydrogenase, mitochondrial                                                                               | 2.29                | 0.058                 | 2.1E-10 | 9                  | 32.8                   |
| P21796                | Voltage-dependent anion-selective channel protein 1                                                               | 2.25                | 0.063                 | 4.3E-06 | 6                  | 22.3                   |
| P22392                | Nucleoside diphosphate kinase B                                                                                   | 2.21                | 0.137                 | 2.0E-03 | 3                  | 24.3                   |
| P14174                | Macrophage migration inhibitory factor                                                                            | 3.96                | NA                    | NA      | 2                  | 17.4                   |
| P00338                | L-lactate dehydrogenase A chain                                                                                   | 3.33                | NA                    | NA      | 2                  | 5.4                    |
| P21912                | Succinate dehydrogenase [ubiquinone] iron-sulfur subunit, mitochondrial                                           | 2.15                | NA                    | NA      | 2                  | 7.1                    |
| P07910                | Heterogeneous nuclear ribonucleoproteins C1/C2                                                                    | 2.08                | NA                    | NA      | 2                  | 8.2                    |
| P52565                | Rho GDP-dissociation inhibitor 1                                                                                  | 2.07                | NA                    | NA      | 2                  | 14.7                   |
| P23528                | Cofilin-1                                                                                                         | 2.02                | NA                    | NA      | 2                  | 10.8                   |
| P01859                | Ig gamma-2 chain C region                                                                                         | 2.02                | 0.210                 | 1.4E-02 | 3                  | 11.0                   |
| P07195                | L-lactate dehydrogenase B chain                                                                                   | 2.01                | NA                    | NA      | 2                  | 6.9                    |
| P99999                | Cytochrome c                                                                                                      | 2.00                | NA                    | NA      | 2                  | 21.9                   |
| P55084                | Trifunctional enzyme subunit beta, mitochondrial                                                                  | 1.97                | NA                    | NA      | 2                  | 4.2                    |
| P30086                | Phosphatidylethanolamine-binding protein 1                                                                        | 1.95                | 0.094                 | 3.5E-02 | 5                  | 31.0                   |
| P01857                | Ig gamma-1 chain C region                                                                                         | 1.94                | 0.054                 | 3.9E-07 | 5                  | 20.3                   |
| Q14103                | Heterogeneous nuclear ribonucleoprotein D0                                                                        | 1.93                | NA                    | NA      | 2                  | 6.2                    |
| P30049                | ATP synthase subunit delta, mitochondrial                                                                         | 1.93                | NA                    | NA      | 2                  | 13.7                   |
| P06576                | ATP synthase subunit beta, mitochondrial                                                                          | 1.93                | 0.053                 | 1.4E-13 | 15                 | 34.4                   |
| P05141                | ADP/ATP translocase 2                                                                                             | 1.92                | 0.068                 | 4.7E-06 | 6                  | 16.4                   |
| Q99798                | Aconitate hydratase, mitochondrial                                                                                | 1.91                | NA                    | NA      | 2                  | 4.0                    |
| P17096                | High mobility group protein HMG-I/HMG-Y                                                                           | 1.91                | NA                    | NA      | 2                  | 23.4                   |
| P62277                | 40S ribosomal protein S13                                                                                         | 1.90                | NA                    | NA      | 2                  | 12.6                   |
| P61604                | 10 kDa heat shock protein, mitochondrial                                                                          | 1.88                | 0.112                 | 1.6E-03 | 4                  | 29.4                   |
| P04075                | Fructose-bisphosphate aldolase A                                                                                  | 1.83                | 0.062                 | 1.3E-05 | 11                 | 36.3                   |
| P09651                | Heterogeneous nuclear ribonucleoprotein A1                                                                        | 1.81                | 0.137                 | 2.9E-03 | 3                  | 9.1                    |
| P78417                | Glutathione S-transferase omega-1                                                                                 | 1.77                | 0.202                 | 4.1E-02 | 3                  | 13.3                   |
| P09622                | Dihydropolypyl dehydrogenase, mitochondrial                                                                       | 1.75                | NA                    | NA      | 2                  | 5.1                    |
| P45880                | Voltage-dependent anion-selective channel protein 2                                                               | 1.71                | 0.119                 | 4.1E-03 | 3                  | 12.9                   |
| P01834                | Ig kappa chain C region                                                                                           | 1.70                | NA                    | NA      | 2                  | 33.0                   |
| P10809                | 60 kDa heat shock protein, mitochondrial                                                                          | 1.67                | 0.183                 | 4.1E-02 | 6                  | 11.5                   |
| P14927                | Cytochrome b-c1 complex subunit 7                                                                                 | 1.66                | NA                    | NA      | 2                  | 19.8                   |
| Q5VTE0                | Putative elongation factor 1-alpha-like 3                                                                         | 1.66                | 0.053                 | 1.1E-06 | 7                  | 14.1                   |
| P11142                | Heat shock cognate 71 kDa protein                                                                                 | 1.66                | 0.060                 | 2.4E-06 | 11                 | 20.6                   |
| Q8IVF2                | Protein AHNK2                                                                                                     | 1.64                | NA                    | NA      | 2                  | 0.4                    |
| Q00325                | Phosphate carrier protein, mitochondrial                                                                          | 1.63                | 0.039                 | 4.2E-04 | 3                  | 9.7                    |
| P62158                | Calmodulin                                                                                                        | 1.59                | NA                    | NA      | 2                  | 22.1                   |
| P25705                | ATP synthase subunit alpha, mitochondrial                                                                         | 1.58                | 0.079                 | 2.3E-04 | 11                 | 23.9                   |
| P04179                | Superoxide dismutase [Mn], mitochondrial                                                                          | 1.58                | 0.089                 | 3.0E-02 | 4                  | 16.7                   |
| P19338                | Nucleolin                                                                                                         | 1.57                | NA                    | NA      | 2                  | 2.8                    |
| P09429                | High mobility group protein B1                                                                                    | 1.56                | 0.060                 | 9.1E-05 | 4                  | 27.0                   |
| Q99623                | Prohibitin-2                                                                                                      | 1.56                | NA                    | NA      | 2                  | 9.4                    |
| P30048                | Thioredoxin-dependent peroxide reductase, mitochondrial                                                           | 1.55                | NA                    | NA      | 2                  | 10.2                   |
| P0CG05                | Ig lambda-2 chain C regions                                                                                       | 1.54                | NA                    | NA      | 2                  | 23.6                   |
| O75964                | ATP synthase subunit g, mitochondrial                                                                             | 1.49                | 0.290                 | 1.7E-01 | 3                  | 33.0                   |
| P38646                | Stress-70 protein, mitochondrial                                                                                  | 1.49                | 0.078                 | 5.7E-04 | 9                  | 17.2                   |
| O14773                | Tripeptidyl-peptidase 1                                                                                           | 1.49                | 0.080                 | 2.3E-04 | 4                  | 8.7                    |
| P01903                | HLA class II histocompatibility antigen, DR alpha chain                                                           | 1.48                | NA                    | NA      | 2                  | 9.8                    |
| P35232                | Prohibitin                                                                                                        | 1.47                | 0.171                 | 1.1E-01 | 6                  | 23.9                   |
| Q99536                | Synaptic vesicle membrane protein VAT-1 homolog                                                                   | 1.43                | 0.050                 | 8.9E-06 | 5                  | 13.2                   |
| P62851                | 40S ribosomal protein S25                                                                                         | 1.43                | NA                    | NA      | 2                  | 12.0                   |
| P36957                | Dihydropolypyllysine-residue succinyltransferase component of 2-oxoglutarate dehydrogenase complex, mitochondrial | 1.41                | 0.124                 | 3.5E-02 | 4                  | 11.0                   |
| P30044                | Peroxisome oxidin-5, mitochondrial                                                                                | 1.40                | NA                    | NA      | 2                  | 8.9                    |
| P49411                | Elongation factor Tu, mitochondrial                                                                               | 1.39                | 0.059                 | 7.1E-03 | 7                  | 18.4                   |
| P22626                | Heterogeneous nuclear ribonucleoproteins A2/B1                                                                    | 1.37                | 0.065                 | 4.8E-04 | 7                  | 21.5                   |
| Q12905                | Interleukin enhancer-binding factor 2                                                                             | 1.34                | NA                    | NA      | 2                  | 6.7                    |
| O60814                | Histone H2B type 1-K                                                                                              | 1.34                | NA                    | NA      | 2                  | 7.9                    |
| P01009                | Alpha-1-antitrypsin                                                                                               | 1.34                | 0.046                 | 1.4E-03 | 4                  | 11.7                   |
| P09382                | Galectin-1                                                                                                        | 1.34                | 0.065                 | 1.5E-04 | 3                  | 23.0                   |
| P40939                | Trifunctional enzyme subunit alpha, mitochondrial                                                                 | 1.33                | NA                    | NA      | 2                  | 2.8                    |
| P40967                | Melanocyte protein PMEL                                                                                           | 1.32                | NA                    | NA      | 2                  | 3.3                    |
| O75367                | Core histone macro-H2A.1                                                                                          | 1.32                | 0.107                 | 1.3E-02 | 5                  | 19.1                   |
| P29401                | Transketolase                                                                                                     | 1.31                | NA                    | NA      | 2                  | 3.4                    |
| P24539                | ATP synthase F(0) complex subunit B1, mitochondrial                                                               | 1.31                | NA                    | NA      | 2                  | 9.0                    |
| Q14697                | Neutral alpha-glucosidase AB                                                                                      | 1.31                | 0.125                 | 9.4E-02 | 3                  | 4.8                    |
| P30101                | Protein disulfide-isomerase A3                                                                                    | 1.30                | 0.046                 | 9.9E-03 | 8                  | 16.0                   |
| P23284                | Peptidyl-prolyl cis-trans isomerase B                                                                             | 1.30                | 0.037                 | 5.1E-05 | 5                  | 25.5                   |
| P61978                | Heterogeneous nuclear ribonucleoprotein K                                                                         | 1.30                | 0.299                 | 3.5E-01 | 3                  | 6.3                    |
| P22695                | Cytochrome b-c1 complex subunit 2, mitochondrial                                                                  | 1.25                | 0.071                 | 4.9E-03 | 4                  | 13.9                   |
| P31930                | Cytochrome b-c1 complex subunit 1, mitochondrial                                                                  | 1.23                | NA                    | NA      | 2                  | 6.5                    |
| Q15149                | Plectin                                                                                                           | 1.20                | 0.159                 | 9.2E-02 | 10                 | 2.3                    |
| P26038                | Moesin                                                                                                            | 1.19                | 0.152                 | 1.2E-01 | 7                  | 9.7                    |
| P61247                | 40S ribosomal protein S3a                                                                                         | 1.17                | 0.618                 | 3.8E-01 | 3                  | 11.4                   |
| O15230                | Laminin subunit alpha-5                                                                                           | 1.16                | 1.878                 | 2.3E-01 | 5                  | 2.1                    |
| P27797                | Calreticulin                                                                                                      | 1.16                | 0.053                 | 1.3E-01 | 3                  | 6.2                    |
| P18124                | 60S ribosomal protein L7                                                                                          | 1.15                | NA                    | NA      | 2                  | 7.7                    |
| P12956                | X-ray repair cross-complementing protein 6                                                                        | 1.15                | 0.074                 | 7.3E-02 | 4                  | 6.6                    |
| P07237                | Protein disulfide-isomerase                                                                                       | 1.15                | 0.082                 | 8.1E-02 | 5                  | 9.8                    |
| P02545                | Prelamin-A/C                                                                                                      | 1.15                | 0.059                 | 5.1E-04 | 25                 | 35.7                   |
| P02647                | Apolipoprotein A-I                                                                                                | 1.14                | NA                    | NA      | 2                  | 7.1                    |
| Q99584                | Protein S100-A13                                                                                                  | 1.13                | NA                    | NA      | 2                  | 23.5                   |

Table S13-Sample UM11

|        |                                                                      |      |        |         |    |      |
|--------|----------------------------------------------------------------------|------|--------|---------|----|------|
| P10606 | Cytochrome c oxidase subunit 5B, mitochondrial                       | 1.11 | NA     | NA      | 2  | 18.6 |
| P11021 | 78 kDa glucose-regulated protein                                     | 1.10 | 0.022  | 3.4E-02 | 5  | 5.8  |
| P51572 | B-cell receptor-associated protein 31                                | 1.09 | 0.714  | 6.4E-01 | 3  | 13.8 |
| P67936 | Tropomyosin alpha-4 chain                                            | 1.08 | 0.338  | 3.0E-01 | 5  | 18.5 |
| Q9NQC3 | Reticulon-4                                                          | 1.06 | NA     | NA      | 2  | 2.3  |
| P09493 | Tropomyosin alpha-1 chain                                            | 1.04 | 3.565  | 7.0E-01 | 4  | 12.0 |
| O00264 | Membrane-associated progesterone receptor component 1                | 1.03 | NA     | NA      | 2  | 12.3 |
| Q8NFI4 | Putative protein FAM10A5                                             | 1.02 | NA     | NA      | 2  | 4.6  |
| Q06830 | Peroxioredoxin-1                                                     | 1.01 | 20.667 | 7.6E-01 | 8  | 40.7 |
| Q71DI3 | Histone H3.2                                                         | 1.00 | 1.198  | 9.8E-01 | 3  | 16.2 |
| P63261 | Actin, cytoplasmic 2                                                 | 1.00 | 0.122  | 9.6E-01 | 6  | 24.8 |
| P08107 | Heat shock 70 kDa protein 1A/1B                                      | 0.99 | 0.238  | 9.5E-01 | 5  | 8.9  |
| P68032 | Actin, alpha cardiac muscle 1                                        | 0.98 | 0.106  | 7.3E-01 | 6  | 25.5 |
| P35637 | RNA-binding protein FUS                                              | 0.98 | NA     | NA      | 2  | 6.3  |
| P27824 | Calnexin                                                             | 0.97 | 0.062  | 2.1E-01 | 4  | 6.8  |
| P55072 | Transitional endoplasmic reticulum ATPase                            | 0.96 | 0.167  | 6.2E-01 | 3  | 5.0  |
| P0C0S5 | Histone H2A.Z                                                        | 0.96 | NA     | NA      | 2  | 18.8 |
| P14625 | Endoplasmic reticulum chaperone protein                              | 0.95 | 1.153  | 5.4E-01 | 9  | 11.2 |
| P69905 | Hemoglobin subunit alpha                                             | 0.94 | 0.227  | 3.4E-01 | 5  | 38.0 |
| O43707 | Alpha-actinin-4                                                      | 0.93 | 1.055  | 6.4E-01 | 6  | 9.3  |
| P12814 | Alpha-actinin-1                                                      | 0.92 | 0.167  | 3.4E-01 | 5  | 6.8  |
| Q03252 | Lamin-B2                                                             | 0.90 | 0.655  | 5.7E-01 | 6  | 9.5  |
| P17931 | Galectin-3                                                           | 0.90 | 0.838  | 3.6E-01 | 4  | 21.2 |
| P18206 | Vinculin                                                             | 0.90 | 0.414  | 4.6E-01 | 4  | 4.7  |
| P02751 | Fibronectin                                                          | 0.89 | 0.491  | 5.0E-01 | 4  | 2.4  |
| P62805 | Histone H4                                                           | 0.88 | 0.060  | 5.4E-03 | 8  | 59.2 |
| Q00610 | Clathrin heavy chain 1                                               | 0.88 | 0.118  | 3.5E-01 | 8  | 6.4  |
| P06396 | Gelsolin                                                             | 0.82 | 0.122  | 8.4E-02 | 5  | 6.9  |
| P0CG47 | Polyubiquitin-B                                                      | 0.82 | 0.046  | 7.8E-03 | 5  | 23.1 |
| P08133 | Annexin A6                                                           | 0.82 | 0.069  | 5.3E-04 | 14 | 24.1 |
| P06899 | Histone H2B type 1-J                                                 | 0.82 | NA     | NA      | 2  | 7.9  |
| P68871 | Hemoglobin subunit beta                                              | 0.82 | 0.087  | 1.6E-02 | 12 | 84.4 |
| P39060 | Collagen alpha-1(XVIII) chain                                        | 0.81 | 0.141  | 1.1E-01 | 4  | 3.0  |
| P21333 | Filamin-A                                                            | 0.79 | 0.083  | 7.9E-05 | 25 | 11.6 |
| P26447 | Protein S100-A4                                                      | 0.78 | NA     | NA      | 2  | 15.8 |
| P35555 | Fibrillin-1                                                          | 0.78 | 0.038  | 2.9E-09 | 27 | 9.7  |
| P55268 | Laminin subunit beta-2                                               | 0.77 | 0.055  | 2.2E-02 | 4  | 2.2  |
| P12111 | Collagen alpha-3(VI) chain                                           | 0.76 | 0.047  | 2.8E-03 | 5  | 1.8  |
| P11047 | Laminin subunit gamma-1                                              | 0.75 | 0.073  | 1.7E-02 | 3  | 2.3  |
| P04792 | Heat shock protein beta-1                                            | 0.73 | 0.075  | 1.8E-03 | 6  | 36.1 |
| P35749 | Myosin-11                                                            | 0.72 | 0.119  | 3.5E-02 | 12 | 7.3  |
| P50993 | Sodium/potassium-transporting ATPase subunit alpha-2                 | 0.71 | 0.083  | 2.8E-02 | 3  | 3.7  |
| P08572 | Collagen alpha-2(IV) chain                                           | 0.71 | 0.213  | 2.1E-01 | 3  | 2.5  |
| P24844 | Myosin regulatory light polypeptide 9                                | 0.68 | NA     | NA      | 2  | 12.2 |
| P14543 | Nidogen-1                                                            | 0.67 | 0.171  | 9.3E-02 | 3  | 3.0  |
| P12110 | Collagen alpha-2(VI) chain                                           | 0.67 | 0.102  | 1.0E-01 | 3  | 3.2  |
| P98160 | Basement membrane-specific heparan sulfate proteoglycan core protein | 0.66 | 0.097  | 7.9E-03 | 9  | 2.6  |
| P60660 | Myosin light polypeptide 6                                           | 0.65 | 0.045  | 3.2E-07 | 7  | 58.3 |
| P05556 | Integrin beta-1                                                      | 0.63 | NA     | NA      | 2  | 3.3  |
| Q09666 | Neuroblast differentiation-associated protein AHNK                   | 0.63 | 0.047  | 3.7E-07 | 7  | 0.6  |
| P32119 | Peroxioredoxin-2                                                     | 0.61 | 0.062  | 2.6E-03 | 5  | 27.3 |
| P12109 | Collagen alpha-1(VI) chain                                           | 0.60 | 0.107  | 5.5E-03 | 4  | 4.7  |
| Q01082 | Spectrin beta chain, non-erythrocytic 1                              | 0.59 | 0.054  | 3.9E-07 | 9  | 5.2  |
| P07437 | Tubulin beta chain                                                   | 0.58 | NA     | NA      | 2  | 7.2  |
| P02511 | Alpha-crystallin B chain                                             | 0.58 | NA     | NA      | 2  | 12.6 |
| Q9Y490 | Talin-1                                                              | 0.58 | 0.091  | 2.0E-03 | 6  | 2.6  |
| Q9Y6C2 | EMILIN-1                                                             | 0.58 | NA     | NA      | 2  | 2.9  |
| O14950 | Myosin regulatory light chain 12B                                    | 0.56 | NA     | NA      | 2  | 12.2 |
| Q13813 | Spectrin alpha chain, non-erythrocytic 1                             | 0.55 | 0.059  | 2.0E-10 | 22 | 11.7 |
| P68371 | Tubulin beta-4B chain                                                | 0.54 | 0.060  | 3.3E-05 | 3  | 10.6 |
| P02749 | Beta-2-glycoprotein 1                                                | 0.54 | 0.055  | 6.3E-04 | 3  | 9.3  |
| P35579 | Myosin-9                                                             | 0.52 | 0.090  | 7.6E-05 | 18 | 9.3  |
| P51884 | Lumican                                                              | 0.51 | 0.025  | 0.0E+00 | 9  | 29.0 |
| P07099 | Epoxide hydrolase 1                                                  | 0.45 | NA     | NA      | 2  | 4.0  |
| P01011 | Alpha-1-antitrypsin                                                  | 0.44 | NA     | NA      | 2  | 4.0  |
| Q02952 | A-kinase anchor protein 12                                           | 0.42 | NA     | NA      | 2  | 1.5  |
| P80723 | Brain acid soluble protein 1                                         | 0.42 | NA     | NA      | 2  | 11.9 |
| P22352 | Glutathione peroxidase 3                                             | 0.41 | NA     | NA      | 2  | 8.0  |
| P07585 | Decorin                                                              | 0.41 | NA     | NA      | 2  | 6.7  |
| Q14195 | Dihydropyrimidinase-related protein 3                                | 0.39 | 0.116  | 7.1E-02 | 3  | 7.2  |
| P04275 | von Willebrand factor                                                | 0.38 | NA     | NA      | 2  | 0.7  |
| P02730 | Band 3 anion transport protein                                       | 0.27 | NA     | NA      | 2  | 2.3  |
| P08123 | Collagen alpha-2(I) chain                                            | 0.20 | NA     | NA      | 2  | 2.4  |
| P02452 | Collagen alpha-1(I) chain                                            | 0.18 | NA     | NA      | 2  | 2.2  |
| P01024 | Complement C3                                                        | 0.48 | 0.091  | 6.9E-03 | 4  | 2.4  |
| P51888 | Prolargin                                                            | 0.47 | 0.030  | 0.0E+00 | 13 | 37.4 |
| P04899 | Guanine nucleotide-binding protein G(i) subunit alpha-2              | 0.47 | 0.003  | 5.0E-05 | 3  | 9.9  |
| P07355 | Annexin A2                                                           | 0.46 | 0.050  | 0.0E+00 | 20 | 55.5 |
| P21810 | Biglycan                                                             | 0.46 | 0.037  | 0.0E+00 | 12 | 37.8 |
| Q9BQE3 | Tubulin alpha-1C chain                                               | 0.46 | 0.061  | 1.1E-07 | 11 | 24.7 |
| Q16555 | Dihydropyrimidinase-related protein 2                                | 0.45 | 0.076  | 9.5E-04 | 3  | 5.6  |
| P01871 | Ig mu chain C region                                                 | 0.44 | 0.111  | 6.1E-06 | 4  | 13.3 |
| P04083 | Annexin A1                                                           | 0.42 | 0.145  | 1.8E-03 | 8  | 26.9 |
| P02675 | Fibrinogen beta chain                                                | 0.38 | 0.196  | 2.2E-02 | 4  | 12.8 |
| Q15661 | Tryptase alpha/beta-1                                                | 0.35 | 0.157  | 2.5E-04 | 3  | 11.6 |
| P41219 | Peripherin                                                           | 0.35 | 0.181  | 1.4E-02 | 3  | 5.3  |
| P21926 | CD9 antigen                                                          | 0.33 | 0.127  | 2.8E-03 | 3  | 9.6  |
| P20774 | Mimecan                                                              | 0.32 | 0.098  | 3.5E-07 | 5  | 14.1 |
| P02671 | Fibrinogen alpha chain                                               | 0.29 | 0.140  | 4.6E-03 | 4  | 4.8  |
| P21980 | Protein-glutamine gamma-glutamyltransferase 2                        | 0.29 | 0.083  | 7.9E-09 | 10 | 13.5 |
| P10909 | Clusterin                                                            | 0.28 | 0.056  | 0.0E+00 | 11 | 24.5 |
| P02649 | Apolipoprotein E                                                     | 0.27 | 0.099  | 5.0E-08 | 9  | 31.2 |
| P60903 | Protein S100-A10                                                     | 0.27 | 0.107  | 2.3E-06 | 3  | 35.1 |
| P04004 | Vitronectin                                                          | 0.19 | 0.081  | 5.7E-09 | 7  | 16.9 |
| P02748 | Complement component C9                                              | 0.16 | 0.082  | 3.1E-06 | 5  | 9.3  |
| P02743 | Serum amyloid P-component                                            | 0.15 | 0.209  | 4.2E-04 | 3  | 13.9 |
| P25189 | Myelin protein P0                                                    | 0.08 | 0.117  | 1.2E-08 | 4  | 15.3 |

Brown denotes change  $\geq 2$  standard deviations (SD) from the mean, yellow denotes change  $\geq 1$  SD and green highlights p values  $\leq 0.05$ . NA, not applicable, n<3 unique peptides.
