# Supplementary material for: iTRAQ Quantitative Proteomic Comparison of Metastatic and Non-Metastatic Uveal Melanoma Tumors
Source: PubMed Central journal article supplement (PMC4549237; doi:10.1371/journal.pone.0135543), 2015-08-25
Supplement: pone.0135543.s014.pdf [file pone.0135543.s014.pdf]

Supplementary Table S14

## Relative Protein Abundance: Sample UM12, Metastatic

Total Proteins Quantified = 193; LogMedian Protein Ratio = 0.07; LogMean Protein Ratio = 0; Standard Deviation = 0.69

| Uni-Prot Accession | Protein                                                                  | Ratio UM/Control | Standard Deviation | p value | Unique Peptides | % Sequence Coverage |
|--------------------|--------------------------------------------------------------------------|------------------|--------------------|---------|-----------------|---------------------|
| P02768             | Serum albumin                                                            | 6.84             | 0.035              | 0.0E+00 | 42              | 66.3                |
| P08670             | Vimentin                                                                 | 4.04             | 0.029              | 0.0E+00 | 26              | 55.2                |
| P00338             | L-lactate dehydrogenase A chain                                          | 3.99             | 0.149              | 1.2E-03 | 3               | 10.2                |
| P07195             | L-lactate dehydrogenase B chain                                          | 3.53             | 0.069              | 5.4E-05 | 3               | 9.6                 |
| P62937             | Peptidyl-prolyl cis-trans isomerase A                                    | 3.45             | 0.148              | 2.7E-03 | 6               | 35.2                |
| P06733             | Alpha-enolase                                                            | 3.34             | 0.101              | 1.4E-03 | 6               | 16.8                |
| P23528             | Cofilin-1                                                                | 3.25             | 0.132              | 1.1E-04 | 3               | 15.7                |
| P00558             | Phosphoglycerate kinase 1                                                | 3.08             | 0.080              | 1.3E-04 | 6               | 15.3                |
| P69905             | Hemoglobin subunit alpha                                                 | 2.75             | 0.050              | 2.2E-16 | 6               | 58.5                |
| P04406             | Glyceraldehyde-3-phosphate dehydrogenase                                 | 2.68             | 0.060              | 0.0E+00 | 12              | 42.1                |
| P68871             | Hemoglobin subunit beta                                                  | 2.42             | 0.023              | 0.0E+00 | 12              | 84.4                |
| P22392             | Nucleoside diphosphate kinase B                                          | 2.39             | 0.070              | 7.1E-04 | 3               | 24.3                |
| Q15746             | Myosin light chain kinase, smooth muscle                                 | 2.39             | 0.106              | 9.7E-05 | 6               | 4.3                 |
| P02787             | Serotransferrin                                                          | 2.29             | 0.074              | 8.0E-10 | 11              | 19.9                |
| P01024             | Complement C3                                                            | 2.22             | 0.298              | 6.9E-03 | 5               | 3.8                 |
| P60174             | Triosephosphate isomerase                                                | 2.18             | 0.198              | 4.6E-03 | 5               | 21.3                |
| P30086             | Phosphatidylethanolamine-binding protein 1                               | 2.13             | 0.059              | 6.5E-06 | 6               | 36.9                |
| Q99798             | Aconitate hydratase, mitochondrial                                       | 2.07             | 0.063              | 7.6E-03 | 3               | 5.3                 |
| P04075             | Fructose-bisphosphate aldolase A                                         | 2.07             | 0.078              | 4.1E-03 | 8               | 28.3                |
| P06748             | Nucleophosmin                                                            | 2.03             | 0.103              | 4.3E-03 | 4               | 12.2                |
| P30044             | Peroxisome oxidin-5, mitochondrial                                       | 1.99             | 0.137              | 4.6E-03 | 3               | 15.4                |
| P14174             | Macrophage migration inhibitory factor                                   | 8.48             | NA                 | NA      | 2               | 17.4                |
| P63104             | 14-3-3 protein zeta/delta                                                | 2.98             | NA                 | NA      | 2               | 10.6                |
| P06744             | Glucose-6-phosphate isomerase                                            | 2.69             | NA                 | NA      | 2               | 4.7                 |
| O75083             | WD repeat-containing protein 1                                           | 2.63             | NA                 | NA      | 2               | 5.9                 |
| P09211             | Glutathione S-transferase P                                              | 2.53             | 0.152              | 3.4E-01 | 4               | 25.7                |
| P31946             | 14-3-3 protein beta/alpha                                                | 2.02             | NA                 | NA      | 2               | 8.9                 |
| P52565             | Rho GDP-dissociation inhibitor 1                                         | 1.95             | 0.156              | 5.6E-03 | 3               | 15.2                |
| P14618             | Pyruvate kinase PKM                                                      | 1.94             | 0.117              | 1.5E-01 | 10              | 21.3                |
| P30041             | Peroxisome oxidin-6                                                      | 1.93             | 0.075              | 1.1E-02 | 5               | 16.5                |
| P40926             | Malate dehydrogenase, mitochondrial                                      | 1.90             | 0.059              | 1.2E-06 | 8               | 29.0                |
| P07339             | Cathepsin D                                                              | 1.90             | 0.052              | 6.1E-03 | 3               | 7.3                 |
| P02652             | Apolipoprotein A-II                                                      | 1.85             | NA                 | NA      | 2               | 11.0                |
| P08758             | Annexin A5                                                               | 1.81             | 0.074              | 1.3E-07 | 10              | 33.4                |
| P02647             | Apolipoprotein A-I                                                       | 1.79             | 0.066              | 6.6E-07 | 6               | 24.0                |
| P05141             | ADP/ATP translocase 2                                                    | 1.78             | 0.079              | 1.6E-02 | 6               | 17.8                |
| P62158             | Calmodulin                                                               | 1.77             | NA                 | NA      | 2               | 22.1                |
| P29401             | Transketolase                                                            | 1.76             | 0.104              | 2.0E-02 | 3               | 5.5                 |
| Q01995             | Transgelin                                                               | 1.75             | 0.026              | 3.3E-06 | 3               | 15.9                |
| P35749             | Myosin-11                                                                | 1.74             | 0.042              | 0.0E+00 | 36              | 20.0                |
| P09493             | Tropomyosin alpha-1 chain                                                | 1.73             | 0.042              | 4.9E-09 | 7               | 19.7                |
| Q9H0U4             | Ras-related protein Rab-1B                                               | 1.70             | NA                 | NA      | 2               | 11.4                |
| P07900             | Heat shock protein HSP 90-alpha                                          | 1.67             | NA                 | NA      | 2               | 2.2                 |
| P0CG05             | Ig lambda-2 chain C regions                                              | 1.67             | NA                 | NA      | 2               | 23.6                |
| P45880             | Voltage-dependent anion-selective channel protein 2                      | 1.65             | 0.105              | 5.6E-02 | 3               | 12.9                |
| P21796             | Voltage-dependent anion-selective channel protein 1                      | 1.61             | 0.115              | 1.1E-02 | 5               | 22.3                |
| P11142             | Heat shock cognate 71 kDa protein                                        | 1.61             | 0.077              | 1.6E-02 | 12              | 20.9                |
| Q12905             | Interleukin enhancer-binding factor 2                                    | 1.57             | NA                 | NA      | 2               | 6.7                 |
| P01009             | Alpha-1-antitrypsin                                                      | 1.57             | 0.058              | 9.9E-07 | 6               | 17.7                |
| P31040             | Succinate dehydrogenase [ubiquinone] flavoprotein subunit, mitochondrial | 1.52             | NA                 | NA      | 2               | 4.2                 |
| P25705             | ATP synthase subunit alpha, mitochondrial                                | 1.49             | 0.072              | 1.8E-05 | 5               | 11.8                |
| Q5VTE0             | Putative elongation factor 1-alpha-like 3                                | 1.49             | 0.073              | 4.0E-05 | 7               | 14.1                |
| P16615             | Sarcoplasmic/endoplasmic reticulum calcium ATPase 2                      | 1.49             | NA                 | NA      | 2               | 2.6                 |
| P10412             | Histone H1.4                                                             | 1.48             | 0.035              | 6.2E-09 | 4               | 15.1                |
| P06576             | ATP synthase subunit beta, mitochondrial                                 | 1.48             | 0.066              | 4.0E-07 | 11              | 23.1                |
| P09651             | Heterogeneous nuclear ribonucleoprotein A1                               | 1.47             | 0.040              | 1.1E-07 | 5               | 13.7                |
| P24844             | Myosin regulatory light polypeptide 9                                    | 1.43             | NA                 | NA      | 2               | 12.2                |
| Q15063             | Periostin                                                                | 1.43             | NA                 | NA      | 2               | 4.7                 |
| Q02878             | 60S ribosomal protein L6                                                 | 1.42             | NA                 | NA      | 2               | 8.0                 |
| P05787             | Keratin, type II cytoskeletal 8                                          | 1.41             | NA                 | NA      | 2               | 4.6                 |
| P30101             | Protein disulfide-isomerase A3                                           | 1.39             | 0.027              | 1.5E-04 | 6               | 12.9                |
| P06703             | Protein S100-A6                                                          | 1.39             | NA                 | NA      | 2               | 16.7                |
| P38646             | Stress-70 protein, mitochondrial                                         | 1.38             | 0.100              | 1.8E-02 | 5               | 9.1                 |
| P22626             | Heterogeneous nuclear ribonucleoproteins A2/B1                           | 1.38             | 0.036              | 3.0E-09 | 6               | 17.8                |
| P49411             | Elongation factor Tu, mitochondrial                                      | 1.36             | 0.084              | 9.4E-03 | 5               | 14.2                |
| P09429             | High mobility group protein B1                                           | 1.36             | 0.069              | 1.0E-04 | 3               | 18.1                |
| P35232             | Prohibitin                                                               | 1.35             | 0.025              | 3.2E-03 | 3               | 12.9                |
| P01857             | Ig gamma-1 chain C region                                                | 1.32             | 0.062              | 3.1E-05 | 4               | 18.8                |
| P50895             | Basal cell adhesion molecule                                             | 1.31             | NA                 | NA      | 2               | 4.3                 |
| O15230             | Laminin subunit alpha-5                                                  | 1.30             | 0.163              | 2.6E-02 | 6               | 2.4                 |
| Q99623             | Prohibitin-2                                                             | 1.29             | NA                 | NA      | 2               | 11.0                |
| Q14697             | Neutral alpha-glucosidase AB                                             | 1.29             | NA                 | NA      | 2               | 3.2                 |
| P61978             | Heterogeneous nuclear ribonucleoprotein K                                | 1.28             | NA                 | NA      | 2               | 5.2                 |
| O75964             | ATP synthase subunit g, mitochondrial                                    | 1.27             | NA                 | NA      | 2               | 27.2                |
| P39019             | 40S ribosomal protein S19                                                | 1.23             | 0.247              | 3.2E-01 | 3               | 18.6                |
| P24539             | ATP synthase F(0) complex subunit B1, mitochondrial                      | 1.21             | NA                 | NA      | 2               | 10.5                |
| Q06830             | Peroxisome oxidin-1                                                      | 1.21             | 0.164              | 8.3E-03 | 9               | 51.8                |
| P12814             | Alpha-actinin-1                                                          | 1.20             | 0.084              | 1.3E-02 | 8               | 11.3                |
| P26641             | Elongation factor 1-gamma                                                | 1.19             | 0.050              | 2.4E-02 | 3               | 8.9                 |
| P61604             | 10 kDa heat shock protein, mitochondrial                                 | 1.18             | NA                 | NA      | 2               | 19.6                |
| P11047             | Laminin subunit gamma-1                                                  | 1.18             | 0.070              | 4.7E-02 | 3               | 2.4                 |
| P62701             | 40S ribosomal protein S4, X isoform                                      | 1.17             | NA                 | NA      | 2               | 7.2                 |
| P23284             | Peptidyl-prolyl cis-trans isomerase B                                    | 1.17             | 0.075              | 9.5E-02 | 5               | 22.7                |
| P55268             | Laminin subunit beta-2                                                   | 1.17             | 0.098              | 4.5E-02 | 9               | 5.3                 |
| P18206             | Vinculin                                                                 | 1.15             | NA                 | NA      | 2               | 2.0                 |
| P26447             | Protein S100-A4                                                          | 1.13             | NA                 | NA      | 2               | 18.8                |
| P08107             | Heat shock 70 kDa protein 1A/1B                                          | 1.12             | 0.316              | 2.1E-01 | 7               | 10.1                |
| O00264             | Membrane-associated progesterone receptor component 1                    | 1.11             | 0.092              | 1.4E-01 | 3               | 15.4                |
| P17931             | Galectin-3                                                               | 1.11             | 0.156              | 8.4E-02 | 5               | 24.0                |
| O14773             | Tripeptidyl-peptidase 1                                                  | 1.10             | 0.069              | 2.3E-02 | 3               | 7.5                 |
| P07237             | Protein disulfide-isomerase                                              | 1.10             | 0.143              | 4.8E-01 | 4               | 7.9                 |
| P12956             | X-ray repair cross-complementing protein 6                               | 1.09             | NA                 | NA      | 2               | 3.0                 |
| P10809             | 60 kDa heat shock protein, mitochondrial                                 | 1.09             | NA                 | NA      | 2               | 3.3                 |
| P11166             | Solute carrier family 2, facilitated glucose transporter member 1        | 1.09             | 0.020              | 5.9E-02 | 3               | 7.1                 |
| P27797             | Calreticulin                                                             | 1.08             | 0.119              | 3.4E-01 | 3               | 7.2                 |
| P04843             | Dolichyl-diphosphooligosaccharide--protein glycosyltransferase subunit 1 | 1.08             | NA                 | NA      | 2               | 4.1                 |

Table S14-Sample UM12

|        |                                                                      |      |       |          |    |      |
|--------|----------------------------------------------------------------------|------|-------|----------|----|------|
| P22695 | Cytochrome b-c1 complex subunit 2, mitochondrial                     | 1.07 | 0.143 | 3.0E-01  | 3  | 10.4 |
| P62906 | 60S ribosomal protein L10a                                           | 1.07 | NA    | NA       | 2  | 12.0 |
| P06396 | Gelsolin                                                             | 1.04 | 2.839 | 6.9E-01  | 6  | 10.9 |
| P26038 | Moesin                                                               | 1.04 | 0.321 | 7.4E-01  | 6  | 9.5  |
| P67936 | Tropomyosin alpha-4 chain                                            | 1.04 | 0.266 | 5.8E-01  | 4  | 17.3 |
| P0CG47 | Polyubiquitin-B                                                      | 1.03 | 0.132 | 3.5E-01  | 7  | 32.3 |
| Q15084 | Protein disulfide-isomerase A6                                       | 1.03 | NA    | NA       | 2  | 6.8  |
| Q15149 | Plectin                                                              | 1.02 | 0.043 | 4.4E-01  | 5  | 1.2  |
| Q16891 | Mitochondrial inner membrane protein                                 | 0.97 | NA    | NA       | 2  | 4.4  |
| P14625 | Endoplasmin                                                          | 0.97 | 0.402 | 8.9E-01  | 6  | 8.8  |
| P60660 | Myosin light polypeptide 6                                           | 0.97 | 0.223 | 5.2E-01  | 7  | 58.3 |
| P27824 | Calnexin                                                             | 0.96 | 0.779 | 5.5E-01  | 5  | 11.0 |
| P62736 | Actin, aortic smooth muscle                                          | 0.96 | 0.108 | 6.2E-01  | 8  | 33.4 |
| Q99536 | Synaptic vesicle membrane protein VAT-1 homolog                      | 0.95 | 0.087 | 2.5E-01  | 3  | 7.9  |
| P32119 | Peroxisredoxin-2                                                     | 0.94 | 0.287 | 7.7E-01  | 4  | 22.2 |
| P11021 | 78 kDa glucose-regulated protein                                     | 0.94 | 0.350 | 7.3E-01  | 6  | 11.3 |
| P40939 | Trifunctional enzyme subunit alpha, mitochondrial                    | 0.93 | 0.121 | 4.2E-01  | 3  | 5.6  |
| P02751 | Fibronectin                                                          | 0.92 | NA    | NA       | 2  | 1.1  |
| P14543 | Nidogen-1                                                            | 0.90 | 0.185 | 3.9E-01  | 3  | 3.4  |
| P17858 | ATP-dependent 6-phosphofructokinase, liver type                      | 0.88 | NA    | NA       | 2  | 4.5  |
| Q43707 | Alpha-actinin-4                                                      | 0.86 | 0.152 | 1.5E-01  | 5  | 9.2  |
| P55072 | Transitional endoplasmic reticulum ATPase                            | 0.84 | 0.330 | 5.3E-01  | 3  | 5.0  |
| P08133 | Annexin A6                                                           | 0.83 | 0.096 | 4.2E-03  | 13 | 23.0 |
| P01834 | Ig kappa chain C region                                              | 0.83 | NA    | NA       | 2  | 33.0 |
| P37802 | Transgelin-2                                                         | 0.83 | NA    | NA       | 2  | 11.1 |
| Q00610 | Clathrin heavy chain 1                                               | 0.83 | 0.156 | 1.1E-01  | 7  | 5.1  |
| P63096 | Guanine nucleotide-binding protein G(i) subunit alpha-1              | 0.83 | NA    | NA       | 2  | 5.9  |
| P05023 | Sodium/potassium-transporting ATPase subunit alpha-1                 | 0.83 | NA    | NA       | 2  | 3.2  |
| O75367 | Core histone macro-H2A.1                                             | 0.81 | 0.090 | 2.7E-02  | 4  | 13.7 |
| P98160 | Basement membrane-specific heparan sulfate proteoglycan core protein | 0.81 | 0.050 | 2.2E-04  | 12 | 3.3  |
| Q9NQC3 | Reticulon-4                                                          | 0.81 | NA    | NA       | 2  | 2.3  |
| P07099 | Epoxide hydrolase 1                                                  | 0.81 | 0.092 | 1.1E-01  | 4  | 13.4 |
| P08294 | Extracellular superoxide dismutase [Cu-Zn]                           | 0.81 | NA    | NA       | 2  | 12.1 |
| P01903 | HLA class II histocompatibility antigen, DR alpha chain              | 0.80 | NA    | NA       | 2  | 11.4 |
| P58876 | Histone H2B type 1-D                                                 | 0.78 | NA    | NA       | 2  | 7.9  |
| P60709 | Actin, cytoplasmic 1                                                 | 0.77 | 0.046 | 1.2E-04  | 7  | 27.7 |
| P09382 | Galectin-1                                                           | 0.75 | 0.060 | 2.5E-04  | 5  | 43.7 |
| P21333 | Filamin-A                                                            | 0.74 | 0.057 | 1.9E-05  | 22 | 11.4 |
| P08572 | Collagen alpha-2(IV) chain                                           | 0.74 | 0.171 | 6.0E-02  | 4  | 2.9  |
| Q9UHG3 | Prenylcysteine oxidase 1                                             | 0.73 | NA    | NA       | 2  | 4.4  |
| Q09666 | Neuroblast differentiation-associated protein AHNAK                  | 0.73 | 0.080 | 1.9E-03  | 12 | 1.4  |
| P04792 | Heat shock protein beta-1                                            | 0.68 | 0.076 | 4.0E-04  | 6  | 36.1 |
| Q01082 | Spectrin beta chain, non-erythrocytic 1                              | 0.68 | 0.055 | 4.4E-06  | 12 | 7.7  |
| P02545 | Prelamin-A/C                                                         | 0.67 | 0.023 | 5.3E-15  | 19 | 29.1 |
| P02511 | Alpha-crystallin B chain                                             | 0.66 | NA    | NA       | 2  | 12.6 |
| Q71D13 | Histone H3.2                                                         | 0.65 | 0.026 | 2.4E-08  | 4  | 21.3 |
| P00450 | Ceruloplasmin                                                        | 0.64 | 0.140 | 6.2E-02  | 3  | 4.4  |
| Q9Y490 | Talin-1                                                              | 0.64 | NA    | NA       | 2  | 0.7  |
| Q29718 | HLA class I histocompatibility antigen, B-2 alpha chain              | 0.64 | NA    | NA       | 2  | 8.3  |
| P00738 | Haptoglobin                                                          | 0.63 | 0.024 | 1.3E-02  | 3  | 6.2  |
| P35579 | Myosin-9                                                             | 0.62 | 0.061 | 9.1E-09  | 22 | 13.0 |
| P06899 | Histone H2B type 1-J                                                 | 0.62 | NA    | NA       | 2  | 7.9  |
| P12111 | Collagen alpha-3(VI) chain                                           | 0.62 | 0.171 | 4.6E-02  | 3  | 1.3  |
| P39060 | Collagen alpha-1(XVIII) chain                                        | 0.61 | 0.200 | 5.8E-01  | 3  | 2.5  |
| P13987 | CD59 glycoprotein                                                    | 0.60 | NA    | NA       | 2  | 15.6 |
| P12109 | Collagen alpha-1(VI) chain                                           | 0.58 | NA    | NA       | 2  | 2.6  |
| Q9BQE3 | Tubulin alpha-1C chain                                               | 0.58 | 0.039 | 2.9E-08  | 11 | 29.4 |
| P62805 | Histone H4                                                           | 0.58 | 0.029 | 1.2E-10  | 6  | 51.5 |
| P41219 | Peripherin                                                           | 0.57 | 0.023 | 2.9E-06  | 4  | 10.9 |
| P07437 | Tubulin beta chain                                                   | 0.55 | 0.049 | 6.4E-06  | 3  | 10.6 |
| Q14195 | Dihydropyrimidinase-related protein 3                                | 0.54 | 0.091 | 2.7E-03  | 3  | 7.7  |
| Q13813 | Spectrin alpha chain, non-erythrocytic 1                             | 0.54 | 0.038 | 0.0E+00  | 27 | 15.1 |
| P0C0S5 | Histone H2A.Z                                                        | 0.54 | NA    | NA       | 2  | 18.8 |
| P68371 | Tubulin beta-4B chain                                                | 0.54 | 0.067 | 2.1E-04  | 3  | 10.6 |
| Q16555 | Dihydropyrimidinase-related protein 2                                | 0.54 | 0.086 | 4.3E-03  | 3  | 9.1  |
| P01011 | Alpha-1-antichymotrypsin                                             | 0.54 | 0.116 | 7.1E-03  | 4  | 9.0  |
| P80723 | Brain acid soluble protein 1                                         | 0.52 | 0.262 | 1.5E-01  | 4  | 31.7 |
| Q03252 | Lamin-B2                                                             | 0.51 | NA    | NA       | 2  | 3.0  |
| O14950 | Myosin regulatory light chain 12B                                    | 0.50 | NA    | NA       | 2  | 12.2 |
| Q15019 | Septin-2                                                             | 0.50 | NA    | NA       | 2  | 6.4  |
| Q14956 | Transmembrane glycoprotein NMB                                       | 0.48 | NA    | NA       | 2  | 4.7  |
| P02675 | Fibrinogen beta chain                                                | 0.46 | NA    | NA       | 2  | 6.7  |
| P07585 | Decorin                                                              | 0.35 | 0.198 | 2.5E-01  | 3  | 6.4  |
| P21926 | CD9 antigen                                                          | 0.32 | NA    | NA       | 2  | 7.5  |
| P08123 | Collagen alpha-2(I) chain                                            | 0.32 | NA    | NA       | 2  | 2.4  |
| P60903 | Protein S100-A10                                                     | 0.28 | NA    | NA       | 2  | 35.1 |
| P23946 | Chymase                                                              | 0.21 | NA    | NA       | 2  | 11.7 |
| P02743 | Serum amyloid P-component                                            | 0.13 | NA    | NA       | 2  | 11.2 |
| P07355 | Annexin A2                                                           | 0.48 | 0.043 | 1.2E-14  | 19 | 53.7 |
| P01871 | Ig mu chain C region                                                 | 0.46 | 0.074 | 2.9E-09  | 4  | 13.1 |
| P35555 | Fibrillin-1                                                          | 0.43 | 0.023 | 0.00E+00 | 18 | 6.9  |
| P51888 | Prolargin                                                            | 0.43 | 0.040 | 0.00E+00 | 13 | 37.7 |
| P02749 | Beta-2-glycoprotein 1                                                | 0.38 | 0.033 | 3.8E-05  | 3  | 9.3  |
| P21810 | Biglycan                                                             | 0.37 | 0.055 | 1.5E-10  | 10 | 32.9 |
| P21980 | Protein-glutamine gamma-glutamyltransferase 2                        | 0.35 | 0.097 | 4.4E-06  | 8  | 13.1 |
| P51884 | Lumican                                                              | 0.34 | 0.048 | 1.0E-10  | 11 | 40.5 |
| P04083 | Annexin A1                                                           | 0.34 | 0.087 | 1.1E-04  | 9  | 32.7 |
| P02671 | Fibrinogen alpha chain                                               | 0.33 | 0.220 | 2.4E-03  | 5  | 7.3  |
| P20774 | Mimecan                                                              | 0.31 | 0.109 | 4.6E-06  | 4  | 11.4 |
| P10909 | Clusterin                                                            | 0.31 | 0.068 | 2.2E-12  | 12 | 27.8 |
| Q15661 | Tryptase alpha/beta-1                                                | 0.31 | 0.121 | 1.2E-06  | 4  | 17.1 |
| P25189 | Myelin protein P0                                                    | 0.30 | 0.097 | 4.8E-10  | 5  | 20.6 |
| P04004 | Vitronectin                                                          | 0.29 | 0.097 | 8.1E-07  | 8  | 20.7 |
| P02730 | Band 3 anion transport protein                                       | 0.24 | 0.103 | 1.4E-06  | 5  | 8.7  |
| P02649 | Apolipoprotein E                                                     | 0.24 | 0.132 | 2.3E-05  | 7  | 23.3 |
| P02748 | Complement component C9                                              | 0.22 | 0.103 | 1.7E-06  | 4  | 7.9  |
| P35625 | Metalloproteinase inhibitor 3                                        | 0.21 | 0.200 | 8.0E-03  | 3  | 15.6 |

Brown denotes change  $\geq 2$  standard deviations (SD) from the mean, yellow denotes change  $\geq 1$  SD and green highlights p values  $\leq 0.05$ . NA, not applicable, n<3 unique peptides.
