# Supplementary material for: iTRAQ Quantitative Proteomic Comparison of Metastatic and Non-Metastatic Uveal Melanoma Tumors
Source: PubMed Central journal article supplement (PMC4549237; doi:10.1371/journal.pone.0135543), 2015-08-25
Supplement: pone.0135543.s015.pdf [file pone.0135543.s015.pdf]

## Supplementary Table S15

## Relative Protein Abundance: Sample UM15, Non-Metastatic

Total Proteins Quantified = 965; LogMedian Protein Ratio = 0.15; LogMean Protein Ratio = 0; Standard Deviation = 0.89

| Uni-Prot Accession | Protein                                              | Ratio UM/Control | Standard Deviation | p value | Unique Peptides | % Sequence Coverage |
|--------------------|------------------------------------------------------|------------------|--------------------|---------|-----------------|---------------------|
| P09211             | Glutathione S-transferase P                          | 8.91             | 0.109              | 4.1E-09 | 6               | 30.5                |
| P08473             | Nephrilysin                                          | 8.12             | 0.306              | 4.1E-03 | 4               | 5.5                 |
| P55769             | NHP2-like protein 1                                  | 8.00             | 0.025              | 9.0E-07 | 3               | 24.2                |
| P00338             | L-lactate dehydrogenase A chain                      | 6.58             | 0.094              | 3.2E-10 | 9               | 22.9                |
| P63241             | Eukaryotic translation initiation factor 5A-1        | 6.45             | 0.175              | 1.0E-03 | 7               | 33.1                |
| P29401             | Transketolase                                        | 6.23             | 0.161              | 2.7E-08 | 14              | 23.1                |
| P62937             | Peptidyl-prolyl cis-trans isomerase A                | 5.68             | 0.108              | 1.1E-15 | 7               | 38.2                |
| P31948             | Stress-induced-phosphoprotein 1                      | 5.36             | 0.102              | 1.8E-13 | 19              | 25.8                |
| P06748             | Nucleophosmin                                        | 5.02             | 0.120              | 2.3E-09 | 7               | 19.4                |
| P00558             | Phosphoglycerate kinase 1                            | 4.90             | 0.080              | 1.3E-15 | 13              | 27.3                |
| P78417             | Glutathione S-transferase omega-1                    | 4.87             | 0.134              | 1.5E-07 | 7               | 24.5                |
| P07195             | L-lactate dehydrogenase B chain                      | 4.78             | 0.100              | 5.9E-08 | 11              | 31.1                |
| P39748             | Flap endonuclease 1                                  | 4.75             | 0.251              | 9.8E-04 | 3               | 7.4                 |
| Q04760             | Lactoylglutathione lyase                             | 4.73             | 0.123              | 1.4E-05 | 4               | 18.5                |
| P04080             | Cystatin-B                                           | 4.66             | 0.139              | 5.7E-07 | 4               | 55.1                |
| Q9Y2X3             | Nucleolar protein 58                                 | 4.65             | 0.431              | 1.9E-02 | 6               | 14.7                |
| P19338             | Nucleolin                                            | 4.60             | 0.076              | 0.0E+00 | 17              | 22.1                |
| Q12931             | Heat shock protein 75 kDa, mitochondrial             | 4.50             | 0.331              | 4.3E-03 | 3               | 6.1                 |
| Q9Y2S2             | Lambda-crystallin homolog                            | 4.41             | 0.194              | 4.8E-04 | 5               | 16.0                |
| Q9UQ80             | Proliferation-associated protein 2G4                 | 4.41             | 0.174              | 2.4E-03 | 3               | 9.9                 |
| P22087             | rRNA 2'-O-methyltransferase fibrillar                | 4.37             | 0.161              | 1.6E-05 | 7               | 27.4                |
| P30086             | Phosphatidylethanolamine-binding protein 1           | 4.33             | 0.094              | 7.9E-06 | 8               | 48.7                |
| P23528             | Cofilin-1                                            | 4.22             | 0.125              | 9.1E-07 | 9               | 42.8                |
| P02768             | Serum albumin                                        | 4.14             | 0.030              | 0.0E+00 | 39              | 53.4                |
| P60174             | Triosephosphate isomerase                            | 4.13             | 0.117              | 1.1E-06 | 13              | 49.7                |
| P40925             | Malate dehydrogenase, cytoplasmic                    | 4.12             | 0.121              | 9.9E-07 | 6               | 22.2                |
| P15531             | Nucleoside diphosphate kinase A                      | 3.98             | 0.078              | 6.8E-09 | 7               | 48.0                |
| Q92820             | Gamma-glutamyl hydrolase                             | 3.93             | 0.104              | 5.3E-06 | 5               | 16.4                |
| P15121             | Aldose reductase                                     | 3.93             | 0.283              | 2.5E-03 | 5               | 20.3                |
| P06733             | Alpha-enolase                                        | 3.82             | 0.073              | 6.5E-13 | 13              | 36.6                |
| Q13838             | Spliceosome RNA helicase DDX39B                      | 3.67             | 0.151              | 3.0E-02 | 5               | 12.4                |
| O75347             | Tubulin-specific chaperone A                         | 3.61             | 0.184              | 4.6E-03 | 4               | 33.3                |
| P63104             | 14-3-3 protein zeta/delta                            | 3.59             | 0.107              | 6.6E-06 | 5               | 26.5                |
| P04406             | Glyceraldehyde-3-phosphate dehydrogenase             | 3.57             | 0.061              | 2.2E-16 | 11              | 38.2                |
| P07108             | Acyl-CoA-binding protein                             | 3.55             | 0.149              | 5.4E-03 | 3               | 52.9                |
| P20591             | Interferon-induced GTP-binding protein Mx1           | 3.50             | 0.285              | 3.4E-03 | 9               | 15.0                |
| P07900             | Heat shock protein HSP 90-alpha                      | 3.45             | 0.078              | 8.7E-13 | 15              | 16.0                |
| P16152             | Carbonyl reductase [NADPH] 1                         | 3.43             | 0.181              | 1.8E-03 | 5               | 23.1                |
| Q13185             | Chromobox protein homolog 3                          | 3.36             | 0.143              | 2.1E-05 | 4               | 20.8                |
| P57729             | Ras-related protein Rab-38                           | 3.29             | 0.183              | 2.8E-03 | 4               | 17.5                |
| P23526             | Adenosylhomocysteinase                               | 3.28             | 0.157              | 3.1E-04 | 7               | 18.8                |
| P24941             | Cyclin-dependent kinase 2                            | 3.23             | 0.028              | 1.4E-03 | 3               | 14.8                |
| P08670             | Vimentin                                             | 3.23             | 0.033              | 0.0E+00 | 32              | 61.6                |
| P50453             | Serpin B9                                            | 3.21             | 0.159              | 2.3E-04 | 8               | 25.0                |
| P61088             | Ubiquitin-conjugating enzyme E2 N                    | 3.21             | 0.259              | 2.0E-02 | 3               | 20.4                |
| P13639             | Elongation factor 2                                  | 3.20             | 0.107              | 5.1E-09 | 16              | 18.4                |
| P02787             | Serotransferrin                                      | 3.19             | 0.069              | 8.0E-15 | 20              | 30.9                |
| O00567             | Nucleolar protein 56                                 | 3.12             | 0.102              | 8.3E-06 | 7               | 11.8                |
| P16401             | Histone H1.5                                         | 3.12             | 0.092              | 7.7E-03 | 4               | 14.6                |
| O75368             | SH3 domain-binding glutamic acid-rich-like protein   | 3.00             | 0.093              | 1.6E-05 | 3               | 32.5                |
| P62826             | GTP-binding nuclear protein Ran                      | 2.99             | 0.180              | 3.4E-03 | 3               | 18.5                |
| P13798             | Acylation-acid-releasing enzyme                      | 2.93             | 0.170              | 5.6E-03 | 4               | 5.7                 |
| Q13576             | Ras GTPase-activating-like protein IQGAP2            | 2.90             | 0.107              | 1.7E-02 | 3               | 1.8                 |
| P17931             | Galectin-3                                           | 2.87             | 0.052              | 4.3E-06 | 6               | 28.4                |
| P14618             | Pyruvate kinase PKM                                  | 2.86             | 0.061              | 1.5E-12 | 13              | 27.3                |
| Q12906             | Interleukin enhancer-binding factor 3                | 2.85             | 0.095              | 1.2E-06 | 12              | 16.1                |
| P12955             | Xaa-Pro dipeptidase                                  | 2.77             | 0.039              | 4.1E-02 | 3               | 5.5                 |
| P06842             | Eukaryotic initiation factor 4A-I                    | 2.75             | 0.223              | 2.8E-03 | 4               | 12.1                |
| Q92598             | Heat shock protein 105 kDa                           | 2.73             | 0.117              | 7.1E-04 | 8               | 9.8                 |
| P08238             | Heat shock protein HSP 90-beta                       | 2.72             | 0.101              | 3.8E-08 | 14              | 17.4                |
| Q8IV08             | Phospholipase D3                                     | 2.70             | 0.195              | 3.7E-03 | 3               | 6.3                 |
| Q08380             | Galectin-3-binding protein                           | 2.67             | 0.168              | 1.2E-03 | 4               | 6.5                 |
| P52565             | Rho GDP-dissociation inhibitor 1                     | 2.64             | 0.175              | 1.0E-02 | 4               | 22.5                |
| P06744             | Glucose-6-phosphate isomerase                        | 2.63             | 0.119              | 1.2E-05 | 8               | 14.7                |
| Q14247             | Src substrate cortactin                              | 2.62             | 0.168              | 8.2E-04 | 7               | 16.5                |
| P05387             | 60S acidic ribosomal protein P2                      | 2.60             | 0.190              | 9.7E-03 | 5               | 25.2                |
| P07910             | Heterogeneous nuclear ribonucleoproteins C1/C2       | 2.58             | 0.098              | 1.3E-05 | 8               | 28.8                |
| Q07955             | Serine/arginine-rich splicing factor 1               | 2.52             | 0.134              | 3.9E-04 | 5               | 17.3                |
| P50395             | Rab GDP dissociation inhibitor beta                  | 2.51             | 0.170              | 1.3E-03 | 8               | 20.7                |
| Q96AG4             | Leucine-rich repeat-containing protein 59            | 2.49             | 0.198              | 2.6E-03 | 5               | 16.9                |
| Q13423             | NAD(P) transhydrogenase, mitochondrial               | 2.48             | 0.092              | 1.6E-06 | 21              | 19.3                |
| P07737             | Profilin-1                                           | 2.48             | 0.118              | 1.9E-05 | 5               | 32.9                |
| P09429             | High mobility group protein B1                       | 2.47             | 0.155              | 7.1E-03 | 9               | 36.7                |
| Q15233             | Non-POU domain-containing octamer-binding protein    | 2.44             | 0.201              | 2.2E-03 | 4               | 9.3                 |
| P23381             | Tryptophan-tRNA ligase, cytoplasmic                  | 7.92             | NA                 | NA      | 2               | 4.5                 |
| P40967             | Melanocyte protein PMEL                              | 6.08             | NA                 | NA      | 2               | 3.3                 |
| Q99541             | Perilipin-2                                          | 6.02             | NA                 | NA      | 2               | 8.0                 |
| Q9UBE0             | SUMO-activating enzyme subunit 1                     | 5.88             | NA                 | NA      | 2               | 5.5                 |
| P20042             | Eukaryotic translation initiation factor 2 subunit 2 | 5.67             | NA                 | NA      | 2               | 9.9                 |
| Q96IU4             | Alpha/beta hydrolase domain-containing protein 14B   | 4.97             | NA                 | NA      | 2               | 11.0                |
| Q13247             | Serine/arginine-rich splicing factor 6               | 4.83             | NA                 | NA      | 2               | 5.5                 |
| P48739             | Phosphatidylinositol transfer protein beta isoform   | 4.13             | NA                 | NA      | 2               | 7.0                 |
| Q00796             | Sorbitol dehydrogenase                               | 3.95             | NA                 | NA      | 2               | 4.8                 |
| P13693             | Translationally-controlled tumor protein             | 3.70             | NA                 | NA      | 2               | 15.7                |
| P10768             | S-formylglutathione hydrolase                        | 3.65             | NA                 | NA      | 2               | 6.0                 |
| P58546             | Myotrophin                                           | 3.62             | NA                 | NA      | 2               | 25.4                |
| P05413             | Fatty acid-binding protein, heart                    | 3.59             | NA                 | NA      | 2               | 11.3                |
| Q86WA6             | Valacyclovir hydrolase                               | 3.54             | NA                 | NA      | 2               | 8.6                 |
| Q03154             | Aminoacylase-1                                       | 3.43             | 0.369              | 3.6E-01 | 3               | 7.4                 |
| P05067             | Amyloid beta A4 protein                              | 3.40             | NA                 | NA      | 2               | 2.3                 |
| Q9Y2W1             | Thyroid hormone receptor-associated protein 3        | 3.20             | 0.294              | 8.8E-02 | 3               | 4.3                 |
| Q99497             | Protein DJ-1                                         | 3.15             | NA                 | NA      | 2               | 16.4                |
| Q16658             | Fascin                                               | 3.08             | NA                 | NA      | 2               | 5.3                 |
| P17096             | High mobility group protein HMG-I/HMG-Y              | 3.04             | NA                 | NA      | 2               | 23.4                |
| P60900             | Proteasome subunit alpha type-6                      | 2.96             | NA                 | NA      | 2               | 8.5                 |
| Q6BCY4             | NADH-cytochrome b5 reductase 2                       | 2.92             | NA                 | NA      | 2               | 11.2                |
| P30085             | UMP-CMP kinase                                       | 2.88             | NA                 | NA      | 2               | 10.7                |
| Q9BVP2             | Guanine nucleotide-binding protein-like 3            | 2.84             | 0.729              | 2.1E-01 | 3               | 4.4                 |
| Q9BRA2             | Thioredoxin domain-containing protein 17             | 2.83             | NA                 | NA      | 2               | 18.7                |
| P12081             | Histidine-tRNA ligase, cytoplasmic                   | 2.82             | NA                 | NA      | 2               | 3.9                 |
| P49773             | Histidine triad nucleotide-binding protein 1         | 2.79             | 0.572              | 1.2E-01 | 3               | 37.3                |
| P54819             | Adenylate kinase 2, mitochondrial                    | 2.77             | NA                 | NA      | 2               | 10.9                |
| Q00688             | Peptidyl-prolyl cis-trans isomerase FKBP3            | 2.73             | NA                 | NA      | 2               | 12.9                |
| Q9BUP0             | EF-hand domain-containing protein D1                 | 2.72             | 0.227              | 1.2E-01 | 3               | 10.9                |
| P21283             | V-type proton ATPase subunit C 1                     | 2.71             | NA                 | NA      | 2               | 3.9                 |
| P30040             | Endoplasmic reticulum resident protein 29            | 2.62             | NA                 | NA      | 2               | 8.4                 |
| P00441             | Superoxide dismutase [Cu-Zn]                         | 2.61             | NA                 | NA      | 2               | 13.0                |
| Q14978             | Nucleolar and coiled-body phosphoprotein 1           | 2.60             | NA                 | NA      | 2               | 3.9                 |

Table S15-Sample UM15

|        |                                                                            |      |       |         |    |      |
|--------|----------------------------------------------------------------------------|------|-------|---------|----|------|
| P13929 | Beta-enolase                                                               | 2.59 | NA    | NA      | 2  | 6.7  |
| P62495 | Eukaryotic peptide chain release factor subunit 1                          | 2.55 | 0.202 | 5.8E-02 | 3  | 6.6  |
| O00541 | Pescadillo homolog                                                         | 2.55 | NA    | NA      | 2  | 2.7  |
| P10599 | Thioredoxin                                                                | 2.53 | NA    | NA      | 2  | 20.0 |
| P25788 | Proteasome subunit alpha type-3                                            | 2.50 | NA    | NA      | 2  | 4.7  |
| P36915 | Guanine nucleotide-binding protein-like 1                                  | 2.50 | NA    | NA      | 2  | 4.3  |
| Q16629 | Serine/arginine-rich splicing factor 7                                     | 2.49 | NA    | NA      | 2  | 8.8  |
| Q9BV40 | Vesicle-associated membrane protein 8                                      | 2.49 | NA    | NA      | 2  | 24.0 |
| Q9UBR2 | Cathepsin Z                                                                | 2.47 | NA    | NA      | 2  | 7.3  |
| P49006 | MARCKS-related protein                                                     | 2.47 | 0.295 | 5.9E-02 | 3  | 17.9 |
| O15371 | Eukaryotic translation initiation factor 3 subunit D                       | 2.45 | NA    | NA      | 2  | 3.5  |
| Q01105 | Protein SET                                                                | 2.43 | 0.098 | 1.1E-04 | 6  | 21.4 |
| Q92688 | Acidic leucine-rich nuclear phosphoprotein 32 family member B              | 2.42 | NA    | NA      | 2  | 9.6  |
| P27816 | Microtubule-associated protein 4                                           | 2.42 | 0.217 | 3.2E-04 | 7  | 9.0  |
| Q12905 | Interleukin enhancer-binding factor 2                                      | 2.42 | 0.087 | 2.0E-05 | 3  | 9.5  |
| P62258 | 14-3-3 protein epsilon                                                     | 2.40 | 0.074 | 3.3E-07 | 9  | 31.4 |
| P26640 | Valine-tRNA ligase                                                         | 2.40 | 0.158 | 3.4E-03 | 4  | 4.4  |
| P18754 | Regulator of chromosome condensation                                       | 2.39 | NA    | NA      | 2  | 8.6  |
| Q9UHX1 | Poly(U)-binding-splicing factor PUF60                                      | 2.36 | 0.142 | 1.6E-02 | 3  | 5.0  |
| O76021 | Ribosomal L1 domain-containing protein 1                                   | 2.33 | 0.283 | 9.1E-02 | 4  | 7.1  |
| P18669 | Phosphoglycerate mutase 1                                                  | 2.32 | 0.102 | 1.5E-04 | 4  | 26.8 |
| P31949 | Protein S100-A11                                                           | 2.32 | NA    | NA      | 2  | 23.8 |
| P50454 | Serpin H1                                                                  | 2.32 | 0.087 | 1.9E-06 | 9  | 23.4 |
| O00625 | Pirin                                                                      | 2.31 | NA    | NA      | 2  | 6.2  |
| P67809 | Nuclease-sensitive element-binding protein 1                               | 2.30 | NA    | NA      | 2  | 11.7 |
| P53999 | Activated RNA polymerase II transcriptional coactivator p15                | 2.28 | NA    | NA      | 2  | 15.7 |
| P25786 | Proteasome subunit alpha type-1                                            | 2.27 | 0.135 | 5.4E-04 | 4  | 15.6 |
| P42224 | Signal transducer and activator of transcription 1-alpha/beta              | 2.26 | 0.138 | 4.7E-03 | 6  | 9.1  |
| P31939 | Bifunctional purine biosynthesis protein PURH                              | 2.25 | 0.271 | 1.4E-01 | 4  | 7.4  |
| P06454 | Prothymosin alpha                                                          | 2.23 | NA    | NA      | 2  | 20.7 |
| P20618 | Proteasome subunit beta type-1                                             | 2.22 | 0.090 | 5.3E-04 | 3  | 13.3 |
| P05198 | Eukaryotic translation initiation factor 2 subunit 1                       | 2.21 | NA    | NA      | 2  | 7.0  |
| Q08211 | ATP-dependent RNA helicase A                                               | 2.20 | 0.142 | 4.0E-05 | 8  | 6.8  |
| P11216 | Glycogen phosphorylase, brain form                                         | 2.20 | 0.085 | 4.3E-08 | 12 | 16.4 |
| P30044 | Peroxisome oxidin-5, mitochondrial                                         | 2.20 | NA    | NA      | 2  | 11.7 |
| P30043 | Flavin reductase (NADPH)                                                   | 2.19 | 0.104 | 7.8E-03 | 3  | 18.9 |
| P42766 | 60S ribosomal protein L35                                                  | 2.19 | NA    | NA      | 2  | 13.8 |
| Q13435 | Splicing factor 3B subunit 2                                               | 2.19 | 0.155 | 8.1E-03 | 5  | 7.2  |
| P49207 | 60S ribosomal protein L34                                                  | 2.18 | 0.144 | 5.5E-02 | 3  | 20.5 |
| P62906 | 60S ribosomal protein L10a                                                 | 2.15 | 0.081 | 1.6E-05 | 8  | 35.9 |
| P27348 | 14-3-3 protein theta                                                       | 2.15 | 0.076 | 1.1E-05 | 5  | 21.6 |
| P02765 | Alpha-2-HS-glycoprotein                                                    | 2.13 | 0.225 | 6.5E-02 | 4  | 9.3  |
| P26641 | Elongation factor 1-gamma                                                  | 2.12 | 0.159 | 5.8E-03 | 5  | 11.9 |
| Q8NC51 | Plasminogen activator inhibitor 1 RNA-binding protein                      | 2.12 | 0.420 | 2.5E-01 | 3  | 10.8 |
| Q92945 | Far upstream element-binding protein 2                                     | 2.11 | 0.136 | 1.9E-04 | 10 | 14.2 |
| P63244 | Guanine nucleotide-binding protein subunit beta-2-like 1                   | 2.11 | 0.218 | 1.6E-02 | 3  | 11.0 |
| P08758 | Annexin A5                                                                 | 2.10 | 0.061 | 3.7E-10 | 16 | 38.8 |
| Q9HAU0 | Pleckstrin homology domain-containing family A member 5                    | 2.10 | NA    | NA      | 2  | 3.3  |
| P40926 | Malate dehydrogenase, mitochondrial                                        | 2.08 | 0.129 | 2.2E-04 | 7  | 22.5 |
| Q13442 | 28 kDa heat- and acid-stable phosphoprotein                                | 2.07 | NA    | NA      | 2  | 13.8 |
| Q02790 | Peptidyl-prolyl cis-trans isomerase FKBP4                                  | 2.06 | 0.235 | 1.7E-02 | 6  | 21.4 |
| P62750 | 60S ribosomal protein L23a                                                 | 2.06 | 0.062 | 2.5E-05 | 5  | 27.6 |
| Q9H0A0 | N-acetyltransferase 10                                                     | 2.05 | NA    | NA      | 2  | 2.2  |
| Q13510 | Acid ceramidase                                                            | 2.05 | 0.182 | 9.5E-03 | 4  | 7.6  |
| O75533 | Splicing factor 3B subunit 1                                               | 2.04 | 0.192 | 9.6E-02 | 4  | 3.6  |
| P21796 | Voltage-dependent anion-selective channel protein 1                        | 2.03 | 0.075 | 4.8E-07 | 8  | 35.0 |
| Q01130 | Serine/arginine-rich splicing factor 2                                     | 2.03 | NA    | NA      | 2  | 10.9 |
| P99999 | Cytochrome c                                                               | 2.02 | NA    | NA      | 2  | 17.1 |
| P07741 | Adenine phosphoribosyltransferase                                          | 2.00 | 0.491 | 3.0E-01 | 3  | 20.0 |
| P61247 | 40S ribosomal protein S3a                                                  | 2.00 | 0.090 | 1.4E-05 | 7  | 28.4 |
| P46777 | 60S ribosomal protein L5                                                   | 2.00 | 0.089 | 5.5E-04 | 5  | 17.8 |
| P48426 | Phosphatidylinositol 5-phosphate 4-kinase type-2 alpha                     | 1.99 | NA    | NA      | 2  | 6.2  |
| P62136 | Serine/threonine-protein phosphatase PP1-alpha catalytic subunit           | 1.99 | 0.177 | 3.2E-02 | 3  | 9.1  |
| Q8WXF1 | Paraspeckle component 1                                                    | 1.99 | NA    | NA      | 2  | 4.0  |
| O14818 | Proteasome subunit alpha type-7                                            | 1.99 | 0.110 | 1.3E-03 | 5  | 20.6 |
| P23246 | Splicing factor, proline- and glutamine-rich                               | 1.99 | 0.259 | 8.8E-03 | 8  | 11.9 |
| Q9NY12 | H/ACA ribonucleoprotein complex subunit 1                                  | 1.99 | NA    | NA      | 2  | 7.4  |
| Q01628 | Interferon-induced transmembrane protein 3                                 | 1.98 | NA    | NA      | 2  | 12.8 |
| P10619 | Lysosomal protective protein                                               | 1.98 | 0.176 | 1.8E-02 | 3  | 6.9  |
| P41091 | Eukaryotic translation initiation factor 2 subunit 3                       | 1.97 | NA    | NA      | 2  | 5.5  |
| Q15631 | Translin                                                                   | 1.97 | 0.517 | 2.5E-01 | 3  | 12.7 |
| P05388 | 60S acidic ribosomal protein P0                                            | 1.97 | 0.171 | 3.6E-02 | 4  | 10.7 |
| P07858 | Cathepsin B                                                                | 1.97 | 0.191 | 5.3E-03 | 5  | 15.9 |
| P61916 | Epididymal secretory protein E1                                            | 1.96 | NA    | NA      | 2  | 12.6 |
| P07954 | Fumarate hydratase, mitochondrial                                          | 1.96 | 0.231 | 5.3E-02 | 3  | 6.9  |
| O14556 | Glyceraldehyde-3-phosphate dehydrogenase, testis-specific                  | 1.96 | 0.149 | 8.6E-02 | 3  | 8.8  |
| P48681 | Nestin                                                                     | 1.95 | 0.299 | 4.2E-02 | 3  | 3.0  |
| Q16576 | Histone-binding protein RBBP7                                              | 1.95 | NA    | NA      | 2  | 9.2  |
| P05141 | ADP/ATP translocase 2                                                      | 1.94 | 0.106 | 4.7E-03 | 5  | 16.8 |
| Q99436 | Proteasome subunit beta type-7                                             | 1.94 | NA    | NA      | 2  | 7.2  |
| P13010 | X-ray repair cross-complementing protein 5                                 | 1.94 | 0.081 | 8.5E-06 | 13 | 16.0 |
| P46783 | 40S ribosomal protein S10                                                  | 1.94 | 0.293 | 5.8E-02 | 3  | 20.0 |
| Q9BZZ5 | Apoptosis inhibitor 5                                                      | 1.93 | 0.064 | 2.2E-03 | 3  | 6.5  |
| P27695 | DNA-(apurinic or apyrimidinic site) lyase                                  | 1.93 | 0.973 | 5.5E-01 | 4  | 12.9 |
| Q15181 | Inorganic pyrophosphatase                                                  | 1.92 | 1.006 | 2.4E-01 | 3  | 13.1 |
| P10809 | 60 kDa heat shock protein, mitochondrial                                   | 1.92 | 0.109 | 3.6E-05 | 14 | 25.5 |
| P16070 | CD44 antigen                                                               | 1.92 | 0.146 | 1.0E-01 | 8  | 10.0 |
| P09651 | Heterogeneous nuclear ribonucleoprotein A1                                 | 1.92 | 0.117 | 5.5E-05 | 7  | 25.5 |
| Q9Y5B9 | FACT complex subunit SPT16                                                 | 1.92 | 0.437 | 2.7E-01 | 3  | 3.4  |
| P62263 | 40S ribosomal protein S14                                                  | 1.91 | 0.087 | 6.0E-04 | 4  | 36.4 |
| E9PAV3 | Nascent polypeptide-associated complex subunit alpha, muscle-specific form | 1.90 | 0.134 | 1.1E-02 | 3  | 2.0  |
| P51159 | Ras-related protein Rab-27A                                                | 1.90 | NA    | NA      | 2  | 10.9 |
| P61204 | ADP-ribosylation factor 3                                                  | 1.90 | NA    | NA      | 2  | 10.5 |
| P61254 | 60S ribosomal protein L26                                                  | 1.89 | 0.082 | 5.2E-03 | 4  | 26.2 |
| O75083 | WD repeat-containing protein 1                                             | 1.89 | 0.126 | 7.1E-04 | 5  | 8.3  |
| Q07020 | 60S ribosomal protein L18                                                  | 1.89 | 0.171 | 4.2E-02 | 3  | 18.6 |
| Q14974 | Importin subunit beta-1                                                    | 1.88 | 0.070 | 1.9E-02 | 4  | 6.7  |
| P25398 | 40S ribosomal protein S12                                                  | 1.88 | 0.081 | 3.4E-03 | 3  | 22.0 |
| P23284 | Peptidyl-prolyl cis-trans isomerase B                                      | 1.88 | 0.054 | 1.3E-04 | 13 | 51.4 |
| Q9BUJ2 | Heterogeneous nuclear ribonucleoprotein U-like protein 1                   | 1.88 | NA    | NA      | 2  | 3.4  |
| Q92616 | Translational activator GCN1                                               | 1.88 | 0.080 | 8.0E-02 | 3  | 1.2  |
| Q9BR76 | Coronin-1B                                                                 | 1.88 | 0.102 | 3.8E-03 | 4  | 6.7  |
| Q9Y608 | Leucine-rich repeat flightless-interacting protein 2                       | 1.88 | NA    | NA      | 2  | 4.9  |
| P51858 | Hepatoma-derived growth factor                                             | 1.87 | 0.154 | 2.4E-02 | 3  | 14.6 |
| O75436 | Vacuolar protein sorting-associated protein 26A                            | 1.87 | 0.301 | 1.2E-01 | 3  | 11.0 |
| P26373 | 60S ribosomal protein L13                                                  | 1.87 | 0.044 | 3.7E-08 | 4  | 19.4 |
| P43243 | Matrin-3                                                                   | 1.87 | 0.164 | 1.4E-02 | 5  | 7.6  |
| P62829 | 60S ribosomal protein L23                                                  | 1.87 | NA    | NA      | 2  | 12.9 |
| P49792 | E3 SUMO-protein ligase RanBP2                                              | 1.87 | 0.212 | 4.9E-02 | 4  | 0.8  |
| Q9UJS0 | Calcium-binding mitochondrial carrier protein Aralar2                      | 1.86 | 0.214 | 4.2E-02 | 4  | 6.8  |
| P51991 | Heterogeneous nuclear ribonucleoprotein A3                                 | 1.86 | 0.054 | 5.2E-05 | 8  | 24.9 |
| P42704 | Leucine-rich PPR motif-containing protein, mitochondrial                   | 1.85 | 0.089 | 2.4E-03 | 5  | 3.8  |
| P29692 | Elongation factor 1-delta                                                  | 1.85 | 0.106 | 2.2E-01 | 3  | 15.7 |
| P34932 | Heat shock 70 kDa protein 4                                                | 1.85 | 0.123 | 1.0E-03 | 8  | 11.1 |
| P13796 | Plastin-2                                                                  | 1.85 | NA    | NA      | 2  | 3.3  |

Table S15-Sample UM15

|        |                                                                             |      |       |         |    |      |
|--------|-----------------------------------------------------------------------------|------|-------|---------|----|------|
| P39687 | Acidic leucine-rich nuclear phosphoprotein 32 family member A               | 1.84 | 0.249 | 6.6E-02 | 3  | 14.1 |
| Q07666 | KH domain-containing, RNA-binding, signal transduction-associated protein 1 | 1.84 | 0.092 | 6.6E-04 | 6  | 11.5 |
| P17900 | Ganglioside GM2 activator                                                   | 1.84 | NA    | NA      | 2  | 7.8  |
| P61604 | 10 kDa heat shock protein, mitochondrial                                    | 1.84 | 0.115 | 2.1E-03 | 5  | 49.0 |
| P61353 | 60S ribosomal protein L27                                                   | 1.84 | 0.104 | 3.2E-04 | 3  | 27.9 |
| Q13303 | Voltage-gated potassium channel subunit beta-2                              | 1.83 | NA    | NA      | 2  | 4.9  |
| P12956 | X-ray repair cross-complementing protein 6                                  | 1.82 | 0.104 | 7.7E-04 | 9  | 16.6 |
| Q02878 | 60S ribosomal protein L6                                                    | 1.82 | 0.069 | 8.7E-06 | 9  | 33.0 |
| P18621 | 60S ribosomal protein L17                                                   | 1.82 | 0.040 | 4.9E-02 | 3  | 19.0 |
| O14879 | Interferon-induced protein with tetratricopeptide repeats 3                 | 1.82 | NA    | NA      | 2  | 4.5  |
| P28070 | Proteasome subunit beta type-4                                              | 1.81 | NA    | NA      | 2  | 7.2  |
| Q8TCS8 | Polyribonucleotide nucleotidyltransferase 1, mitochondrial                  | 1.80 | NA    | NA      | 2  | 2.8  |
| P50914 | 60S ribosomal protein L14                                                   | 1.80 | 0.098 | 1.4E-04 | 3  | 16.3 |
| P24534 | Elongation factor 1-beta                                                    | 1.78 | 0.147 | 2.0E-02 | 3  | 9.8  |
| Q9GZT3 | SRA stem-loop-interacting RNA-binding protein, mitochondrial                | 1.77 | NA    | NA      | 2  | 23.9 |
| P02790 | Hemopexin                                                                   | 1.77 | 0.053 | 1.6E-05 | 3  | 6.3  |
| P09622 | Dihydropyridyl dehydrogenase, mitochondrial                                 | 1.77 | 0.142 | 4.1E-02 | 6  | 12.8 |
| P07093 | Glia-derived nexin                                                          | 1.77 | NA    | NA      | 2  | 6.0  |
| P52272 | Heterogeneous nuclear ribonucleoprotein M                                   | 1.76 | 0.076 | 4.7E-02 | 10 | 15.8 |
| P31153 | S-adenosylmethionine synthase isoform type-2                                | 1.76 | 0.239 | 9.4E-02 | 3  | 9.4  |
| P01859 | Ig gamma-2 chain C region                                                   | 1.76 | 0.167 | 7.6E-02 | 3  | 12.0 |
| P52597 | Heterogeneous nuclear ribonucleoprotein F                                   | 1.76 | 0.132 | 1.1E-02 | 4  | 10.1 |
| P46926 | Glucosamine-6-phosphate isomerase 1                                         | 1.76 | NA    | NA      | 2  | 5.9  |
| P36578 | 60S ribosomal protein L4                                                    | 1.75 | 0.102 | 2.2E-03 | 7  | 17.8 |
| Q1KMD3 | Heterogeneous nuclear ribonucleoprotein U-like protein 2                    | 1.75 | 0.191 | 7.8E-02 | 3  | 4.1  |
| Q9NR30 | Nucleolar RNA helicase 2                                                    | 1.75 | NA    | NA      | 2  | 3.3  |
| P11142 | Heat shock cognate 71 kDa protein                                           | 1.74 | 0.058 | 5.9E-07 | 10 | 16.1 |
| Q60866 | 40S ribosomal protein S20                                                   | 1.74 | NA    | NA      | 2  | 19.3 |
| Q00059 | Transcription factor A, mitochondrial                                       | 1.73 | 0.104 | 9.1E-03 | 4  | 16.7 |
| P22626 | Heterogeneous nuclear ribonucleoproteins A2/B1                              | 1.73 | 0.080 | 6.4E-06 | 14 | 37.7 |
| P62316 | Small nuclear ribonucleoprotein Sm D2                                       | 1.73 | NA    | NA      | 2  | 16.1 |
| Q14165 | Malectin                                                                    | 1.72 | NA    | NA      | 2  | 10.6 |
| Q92499 | ATP-dependent RNA helicase DDX1                                             | 1.72 | NA    | NA      | 2  | 2.8  |
| Q99729 | Heterogeneous nuclear ribonucleoprotein A/B                                 | 1.71 | NA    | NA      | 2  | 3.9  |
| P55265 | Double-stranded RNA-specific adenosine deaminase                            | 1.71 | 0.482 | 2.7E-01 | 3  | 2.7  |
| P17844 | Probable ATP-dependent RNA helicase DDX5                                    | 1.71 | 0.104 | 6.3E-02 | 4  | 6.4  |
| POCW22 | 40S ribosomal protein S17-like                                              | 1.71 | NA    | NA      | 2  | 15.6 |
| Q15102 | Platelet-activating factor acetylhydrolase 1B subunit gamma                 | 1.70 | NA    | NA      | 2  | 15.2 |
| O00170 | AH receptor-interacting protein                                             | 1.70 | 0.268 | 7.0E-02 | 5  | 18.5 |
| P83731 | 60S ribosomal protein L24                                                   | 1.70 | 0.298 | 8.7E-02 | 3  | 19.1 |
| P51149 | Ras-related protein Rab-7a                                                  | 1.69 | 0.129 | 5.0E-04 | 7  | 35.7 |
| P78527 | DNA-dependent protein kinase catalytic subunit                              | 1.69 | 0.045 | 1.7E-10 | 20 | 4.5  |
| P39019 | 40S ribosomal protein S19                                                   | 1.69 | 0.136 | 2.2E-03 | 4  | 19.3 |
| P21281 | V-type proton ATPase subunit B, brain isoform                               | 1.69 | NA    | NA      | 2  | 5.1  |
| Q5VTE0 | Putative elongation factor 1-alpha-like 3                                   | 1.69 | 0.049 | 3.0E-06 | 10 | 21.4 |
| P62857 | 40S ribosomal protein S28                                                   | 1.68 | NA    | NA      | 2  | 30.4 |
| P62277 | 40S ribosomal protein S13                                                   | 1.68 | 0.107 | 2.8E-04 | 6  | 29.1 |
| P06737 | Glycogen phosphorylase, liver form                                          | 1.68 | 0.077 | 3.2E-05 | 15 | 19.7 |
| Q9UKM9 | RNA-binding protein Raly                                                    | 1.67 | 0.081 | 3.0E-02 | 5  | 19.0 |
| Q9NTK5 | Obg-like ATPase 1                                                           | 1.67 | 0.615 | 2.7E-01 | 3  | 10.4 |
| Q99873 | Protein arginine N-methyltransferase 1                                      | 1.66 | NA    | NA      | 2  | 7.5  |
| Q00839 | Heterogeneous nuclear ribonucleoprotein U                                   | 1.65 | 0.090 | 4.3E-04 | 8  | 9.6  |
| P07919 | Cytochrome b-c1 complex subunit 6, mitochondrial                            | 1.65 | NA    | NA      | 2  | 15.4 |
| P53985 | Monocarboxylate transporter 1                                               | 1.65 | NA    | NA      | 2  | 6.4  |
| P38646 | Stress-70 protein, mitochondrial                                            | 1.65 | 0.102 | 6.1E-04 | 16 | 28.4 |
| Q06323 | Proteasome activator complex subunit 1                                      | 1.65 | 0.133 | 4.9E-03 | 5  | 21.7 |
| P62888 | 60S ribosomal protein L30                                                   | 1.64 | NA    | NA      | 2  | 20.9 |
| P62424 | 60S ribosomal protein L7a                                                   | 1.64 | 0.299 | 9.8E-02 | 6  | 20.3 |
| Q8IWB7 | WD repeat and FYVE domain-containing protein 1                              | 1.64 | NA    | NA      | 2  | 5.1  |
| P55209 | Nucleosome assembly protein 1-like 1                                        | 1.63 | 0.056 | 5.2E-03 | 3  | 12.0 |
| P50402 | Emerin                                                                      | 1.63 | NA    | NA      | 2  | 9.8  |
| P60981 | Dextrin                                                                     | 1.63 | 0.175 | 4.6E-02 | 3  | 18.2 |
| P06753 | Tropomyosin alpha-3 chain                                                   | 1.63 | 0.169 | 3.5E-03 | 4  | 13.0 |
| Q12874 | Splicing factor 3A subunit 3                                                | 1.62 | 0.502 | 2.2E-01 | 3  | 5.8  |
| Q15717 | ELAV-like protein 1                                                         | 1.62 | 0.344 | 1.2E-01 | 5  | 19.0 |
| P62899 | 60S ribosomal protein L31                                                   | 1.61 | NA    | NA      | 2  | 13.6 |
| P62158 | Calmodulin                                                                  | 1.61 | 0.159 | 1.0E-02 | 3  | 22.1 |
| P20700 | Lamin-B1                                                                    | 1.61 | 0.155 | 2.2E-02 | 12 | 21.3 |
| P46937 | Yorkie homolog                                                              | 1.61 | NA    | NA      | 2  | 6.7  |
| P62318 | Small nuclear ribonucleoprotein Sm D3                                       | 1.60 | NA    | NA      | 2  | 23.8 |
| Q8N766 | ER membrane protein complex subunit 1                                       | 1.60 | NA    | NA      | 2  | 2.4  |
| P13489 | Ribonuclease inhibitor                                                      | 1.60 | 0.244 | 1.9E-01 | 3  | 6.1  |
| Q02543 | 60S ribosomal protein L18a                                                  | 1.59 | NA    | NA      | 2  | 10.2 |
| Q96C86 | m7GpppX diphosphatase                                                       | 1.59 | NA    | NA      | 2  | 7.1  |
| Q99623 | Prohibitin-2                                                                | 1.59 | 0.042 | 5.8E-06 | 7  | 24.7 |
| P61981 | 14-3-3 protein gamma                                                        | 1.59 | NA    | NA      | 2  | 9.7  |
| P04075 | Fructose-bisphosphate aldolase A                                            | 1.59 | 0.073 | 2.8E-04 | 11 | 37.9 |
| P08107 | Heat shock 70 kDa protein 1A/1B                                             | 1.57 | 0.056 | 1.1E-07 | 14 | 23.2 |
| P35232 | Prohibitin                                                                  | 1.56 | 0.049 | 2.0E-07 | 7  | 25.4 |
| O14773 | Tripeptidyl-peptidase 1                                                     | 1.56 | 0.188 | 1.4E-02 | 4  | 8.7  |
| Q07960 | Rho GTPase-activating protein 1                                             | 1.55 | NA    | NA      | 2  | 3.6  |
| P14854 | Cytochrome c oxidase subunit 6B1                                            | 1.55 | NA    | NA      | 2  | 24.4 |
| Q15365 | Poly(rC)-binding protein 1                                                  | 1.54 | 0.097 | 2.2E-03 | 5  | 16.3 |
| P04792 | Heat shock protein beta-1                                                   | 1.54 | 0.137 | 1.5E-02 | 6  | 31.2 |
| Q13428 | Treacle protein                                                             | 1.54 | 0.133 | 6.4E-02 | 3  | 2.3  |
| O00560 | Syntenin-1                                                                  | 1.54 | 0.411 | 2.8E-01 | 4  | 11.4 |
| Q60506 | Heterogeneous nuclear ribonucleoprotein Q                                   | 1.54 | 0.166 | 2.0E-02 | 4  | 5.8  |
| Q00341 | Vigilin                                                                     | 1.54 | NA    | NA      | 2  | 1.0  |
| Q9Y6M9 | NADH dehydrogenase [ubiquinone] 1 beta subcomplex subunit 9                 | 1.54 | NA    | NA      | 2  | 15.6 |
| Q13347 | Eukaryotic translation initiation factor 3 subunit I                        | 1.53 | NA    | NA      | 2  | 7.1  |
| Q92841 | Probable ATP-dependent RNA helicase DDX17                                   | 1.53 | 0.175 | 2.8E-02 | 8  | 12.3 |
| P02766 | Transthyretin                                                               | 1.52 | NA    | NA      | 2  | 24.5 |
| P09661 | U2 small nuclear ribonucleoprotein A'                                       | 1.52 | 0.167 | 5.9E-02 | 3  | 12.9 |
| O75643 | U5 small nuclear ribonucleoprotein 200 kDa helicase                         | 1.52 | 0.202 | 3.7E-02 | 7  | 3.1  |
| P62847 | 40S ribosomal protein S24                                                   | 1.51 | NA    | NA      | 2  | 9.0  |
| P02652 | Apolipoprotein A-II                                                         | 1.51 | 1.149 | 3.0E-01 | 3  | 21.0 |
| Q9HD20 | Manganese-transporting ATPase 13A1                                          | 1.50 | NA    | NA      | 2  | 2.6  |
| P07602 | Prosaposin                                                                  | 1.50 | 0.135 | 3.7E-02 | 4  | 5.3  |
| P14406 | Cytochrome c oxidase subunit 7A2, mitochondrial                             | 1.50 | NA    | NA      | 2  | 27.7 |
| P13797 | Plastin-3                                                                   | 1.50 | NA    | NA      | 2  | 4.0  |
| P08865 | 40S ribosomal protein SA                                                    | 1.50 | 0.064 | 1.6E-03 | 6  | 24.4 |
| O95336 | 6-phosphogluconolactonase                                                   | 1.50 | 0.356 | 2.2E-01 | 4  | 20.9 |
| P62249 | 40S ribosomal protein S16                                                   | 1.50 | 0.127 | 1.9E-03 | 4  | 26.7 |
| Q15907 | Ras-related protein Rab-11B                                                 | 1.49 | 0.106 | 2.6E-02 | 4  | 17.0 |
| P69905 | Hemoglobin subunit alpha                                                    | 1.49 | 0.105 | 5.5E-04 | 5  | 53.5 |
| P09874 | Poly [ADP-ribose] polymerase 1                                              | 1.49 | 0.075 | 1.5E-03 | 7  | 7.9  |
| Q9Y411 | Unconventional myosin-Va                                                    | 1.48 | 0.119 | 1.5E-02 | 9  | 5.0  |
| P02042 | Hemoglobin subunit delta                                                    | 1.48 | NA    | NA      | 2  | 17.7 |
| P40429 | 60S ribosomal protein L13a                                                  | 1.48 | 0.136 | 1.0E-02 | 7  | 26.6 |
| Q96199 | Succinyl-CoA ligase [GDP-forming] subunit beta, mitochondrial               | 1.48 | NA    | NA      | 2  | 4.6  |
| Q13310 | Polyadenylate-binding protein 4                                             | 1.48 | NA    | NA      | 2  | 3.6  |
| P27635 | 60S ribosomal protein L10                                                   | 1.47 | 0.075 | 1.3E-02 | 5  | 22.0 |
| P39023 | 60S ribosomal protein L3                                                    | 1.47 | 0.271 | 1.5E-01 | 5  | 10.9 |
| P49327 | Fatty acid synthase                                                         | 1.47 | NA    | NA      | 2  | 1.0  |
| P46779 | 60S ribosomal protein L28                                                   | 1.46 | 0.096 | 1.9E-02 | 3  | 19.0 |

Table S15-Sample UM15

|        |                                                                                   |      |       |         |    |      |
|--------|-----------------------------------------------------------------------------------|------|-------|---------|----|------|
| Q9Y3U8 | 60S ribosomal protein L36                                                         | 1.45 | 0.121 | 6.1E-03 | 5  | 36.2 |
| Q9UNF0 | Protein kinase C and casein kinase substrate in neurons protein 2                 | 1.45 | 0.109 | 1.1E-01 | 3  | 6.8  |
| Q9BWZ7 | Nuclear pore complex protein Nup85                                                | 1.45 | NA    | NA      | 2  | 2.6  |
| P46109 | Crk-like protein                                                                  | 1.44 | NA    | NA      | 2  | 7.9  |
| P35268 | 60S ribosomal protein L22                                                         | 1.44 | NA    | NA      | 2  | 18.8 |
| P61978 | Heterogeneous nuclear ribonucleoprotein K                                         | 1.44 | 0.078 | 3.5E-04 | 13 | 32.4 |
| P02774 | Vitamin D-binding protein                                                         | 1.44 | 0.161 | 3.5E-02 | 6  | 8.6  |
| P14866 | Heterogeneous nuclear ribonucleoprotein L                                         | 1.44 | 0.160 | 3.3E-02 | 8  | 19.5 |
| P30101 | Protein disulfide-isomerase A3                                                    | 1.44 | 0.073 | 2.6E-05 | 16 | 28.9 |
| O14979 | Heterogeneous nuclear ribonucleoprotein D-like                                    | 1.43 | NA    | NA      | 2  | 2.1  |
| P23396 | 40S ribosomal protein S3                                                          | 1.43 | 0.034 | 4.9E-09 | 9  | 37.0 |
| P07339 | Cathepsin D                                                                       | 1.42 | 0.096 | 3.5E-03 | 4  | 9.7  |
| P62851 | 40S ribosomal protein S25                                                         | 1.42 | 0.159 | 1.9E-02 | 3  | 24.0 |
| P30837 | Aldehyde dehydrogenase X, mitochondrial                                           | 1.42 | 0.189 | 9.1E-02 | 5  | 14.1 |
| P84103 | Serine/arginine-rich splicing factor 3                                            | 1.42 | 0.329 | 1.9E-01 | 3  | 20.7 |
| P15880 | 40S ribosomal protein S2                                                          | 1.42 | 0.124 | 1.9E-02 | 4  | 16.0 |
| Q16666 | Gamma-interferon-inducible protein 16                                             | 1.41 | NA    | NA      | 2  | 2.5  |
| P61421 | V-type proton ATPase subunit d 1                                                  | 1.41 | 0.066 | 4.8E-03 | 3  | 7.4  |
| O75390 | Citrate synthase, mitochondrial                                                   | 1.41 | 0.345 | 2.9E-01 | 4  | 8.4  |
| P49189 | 4-trimethylaminobutyraldehyde dehydrogenase                                       | 1.41 | NA    | NA      | 2  | 3.6  |
| P18124 | 60S ribosomal protein L7                                                          | 1.41 | 0.051 | 5.2E-05 | 5  | 15.7 |
| Q9ULV4 | Coronin-1C                                                                        | 1.40 | 2.010 | 5.9E-01 | 3  | 6.5  |
| P30050 | 60S ribosomal protein L12                                                         | 1.40 | 0.247 | 1.2E-01 | 4  | 35.8 |
| Q9Y6U3 | Adseverin                                                                         | 1.40 | 0.291 | 7.3E-01 | 4  | 4.9  |
| O75494 | Serine/arginine-rich splicing factor 10                                           | 1.40 | NA    | NA      | 2  | 8.4  |
| O75367 | Core histone macro-H2A.1                                                          | 1.40 | 0.165 | 5.8E-03 | 9  | 22.0 |
| Q86U42 | Polyadenylate-binding protein 2                                                   | 1.40 | 0.094 | 2.2E-02 | 4  | 12.4 |
| P62280 | 40S ribosomal protein S11                                                         | 1.39 | 0.372 | 3.3E-01 | 4  | 22.8 |
| P10155 | 60 kDa SS-A/Ro ribonucleoprotein                                                  | 1.39 | NA    | NA      | 2  | 4.5  |
| Q9Y262 | Eukaryotic translation initiation factor 3 subunit L                              | 1.39 | 0.226 | 9.8E-02 | 6  | 10.3 |
| P32969 | 60S ribosomal protein L9                                                          | 1.39 | 0.076 | 3.4E-02 | 5  | 22.9 |
| Q9P2E9 | Ribosome-binding protein 1                                                        | 1.39 | 0.709 | 1.3E-01 | 8  | 7.0  |
| O00231 | 26S proteasome non-ATPase regulatory subunit 11                                   | 1.38 | 0.244 | 9.8E-02 | 5  | 12.6 |
| P11586 | C-1-tetrahydrofolate synthase, cytoplasmic                                        | 1.38 | 0.233 | 6.4E-02 | 5  | 6.3  |
| Q16543 | Hsp90 co-chaperone Cdc37                                                          | 1.38 | NA    | NA      | 2  | 5.3  |
| Q14103 | Heterogeneous nuclear ribonucleoprotein D0                                        | 1.38 | NA    | NA      | 2  | 6.8  |
| P11940 | Polyadenylate-binding protein 1                                                   | 1.38 | 0.069 | 2.1E-03 | 6  | 11.3 |
| Q13263 | Transcription intermediary factor 1-beta                                          | 1.38 | 0.080 | 9.1E-03 | 4  | 5.3  |
| Q15942 | Zyxin                                                                             | 1.37 | NA    | NA      | 2  | 5.4  |
| Q96KP4 | Cytosolic non-specific dipeptidase                                                | 1.37 | 0.070 | 9.0E-03 | 4  | 11.8 |
| P37802 | Transgelin-2                                                                      | 1.37 | NA    | NA      | 2  | 10.1 |
| O14561 | Acyl carrier protein, mitochondrial                                               | 1.37 | NA    | NA      | 2  | 9.6  |
| P30533 | Alpha-2-macroglobulin receptor-associated protein                                 | 1.36 | 0.509 | 2.9E-01 | 4  | 9.0  |
| Q9Y4W6 | AFG3-like protein 2                                                               | 1.36 | 0.472 | 2.2E-01 | 7  | 10.0 |
| P52566 | Rho GDP-dissociation inhibitor 2                                                  | 1.36 | NA    | NA      | 2  | 15.4 |
| B5ME19 | Eukaryotic translation initiation factor 3 subunit C-like protein                 | 1.36 | NA    | NA      | 2  | 2.2  |
| P36543 | V-type proton ATPase subunit E 1                                                  | 1.35 | 0.372 | 3.4E-01 | 3  | 12.4 |
| P65786 | Puromycin-sensitive aminopeptidase                                                | 1.35 | 0.193 | 1.0E-01 | 5  | 6.3  |
| P50213 | Isocitrate dehydrogenase [NAD] subunit alpha, mitochondrial                       | 1.34 | 0.101 | 3.1E-02 | 3  | 10.1 |
| P12830 | Cadherin-1                                                                        | 1.34 | NA    | NA      | 2  | 2.7  |
| P12270 | Nucleoprotein TPR                                                                 | 1.34 | 0.172 | 7.1E-02 | 13 | 7.2  |
| P27144 | Adenylate kinase 4, mitochondrial                                                 | 1.34 | NA    | NA      | 2  | 9.9  |
| P61758 | Prefoldin subunit 3                                                               | 1.34 | NA    | NA      | 2  | 8.1  |
| P62269 | 40S ribosomal protein S18                                                         | 1.34 | 0.184 | 8.9E-02 | 6  | 31.6 |
| P38606 | V-type proton ATPase catalytic subunit A                                          | 1.33 | 0.147 | 7.4E-02 | 3  | 5.7  |
| P30041 | Peroxisomal protein 6                                                             | 1.33 | 0.111 | 1.4E-02 | 7  | 25.4 |
| O14949 | Cytochrome b-c1 complex subunit 8                                                 | 1.33 | NA    | NA      | 2  | 25.6 |
| O43681 | ATPase ASNA1                                                                      | 1.33 | NA    | NA      | 2  | 4.6  |
| P62913 | 60S ribosomal protein L11                                                         | 1.33 | 0.038 | 5.6E-03 | 3  | 16.9 |
| P27824 | Calnexin                                                                          | 1.33 | 0.258 | 5.8E-02 | 11 | 20.8 |
| P37837 | Transaldolase                                                                     | 1.32 | 0.212 | 3.2E-01 | 5  | 14.2 |
| Q9GZS3 | WD repeat-containing protein 61                                                   | 1.31 | NA    | NA      | 2  | 7.5  |
| Q8N1F7 | Nuclear pore complex protein Nup93                                                | 1.31 | NA    | NA      | 2  | 3.2  |
| Q99536 | Synaptic vesicle membrane protein VAT-1 homolog                                   | 1.31 | 0.179 | 3.7E-02 | 10 | 28.2 |
| P45880 | Voltage-dependent anion-selective channel protein 2                               | 1.31 | 0.093 | 1.7E-03 | 6  | 21.8 |
| P53396 | ATP-citrate synthase                                                              | 1.31 | NA    | NA      | 2  | 2.6  |
| Q13098 | COP9 signalosome complex subunit 1                                                | 1.30 | NA    | NA      | 2  | 3.3  |
| Q9NSD9 | Phenylalanine-tRNA ligase beta subunit                                            | 1.30 | 0.793 | 6.9E-01 | 3  | 5.4  |
| O75380 | NADH dehydrogenase [ubiquinone] iron-sulfur protein 6, mitochondrial              | 1.30 | NA    | NA      | 2  | 20.2 |
| Q04837 | Single-stranded DNA-binding protein, mitochondrial                                | 1.30 | NA    | NA      | 2  | 11.5 |
| P26599 | Polypyrimidine tract-binding protein 1                                            | 1.30 | 0.076 | 1.2E-02 | 5  | 8.3  |
| Q7KZF4 | Staphylococcal nuclease domain-containing protein 1                               | 1.30 | 0.104 | 4.2E-02 | 4  | 6.5  |
| P47813 | Eukaryotic translation initiation factor 1A, X-chromosomal                        | 1.30 | NA    | NA      | 2  | 15.3 |
| P35613 | Basigin                                                                           | 1.29 | NA    | NA      | 2  | 8.3  |
| P42167 | Lamina-associated polypeptide 2, isoforms beta/gamma                              | 1.29 | NA    | NA      | 2  | 4.6  |
| P26885 | Peptidyl-prolyl cis-trans isomerase FKBP2                                         | 1.29 | NA    | NA      | 2  | 14.1 |
| Q9NV17 | ATPase family AAA domain-containing protein 3A                                    | 1.29 | NA    | NA      | 2  | 3.9  |
| P35580 | Myosin-10                                                                         | 1.29 | 0.075 | 1.1E-04 | 32 | 17.6 |
| P49755 | Transmembrane emp24 domain-containing protein 10                                  | 1.29 | 0.118 | 8.0E-02 | 3  | 14.6 |
| O43852 | Calumenin                                                                         | 1.28 | 0.091 | 3.8E-02 | 6  | 25.7 |
| Q15424 | Scaffold attachment factor B1                                                     | 1.28 | NA    | NA      | 2  | 1.9  |
| P35998 | 26S protease regulatory subunit 7                                                 | 1.28 | NA    | NA      | 2  | 5.8  |
| Q92597 | Protein NDRG1                                                                     | 1.28 | 0.038 | 6.6E-03 | 3  | 9.1  |
| P30519 | Heme oxygenase 2                                                                  | 1.28 | 0.683 | 3.1E-01 | 3  | 15.8 |
| Q16891 | Mitochondrial inner membrane protein                                              | 1.28 | 0.112 | 2.3E-02 | 8  | 14.6 |
| Q92599 | Septin-8                                                                          | 1.28 | NA    | NA      | 2  | 6.0  |
| P40616 | ADP-ribosylation factor-like protein 1                                            | 1.27 | NA    | NA      | 2  | 12.7 |
| O75694 | Nuclear pore complex protein Nup155                                               | 1.27 | NA    | NA      | 2  | 1.6  |
| P31689 | DnaJ homolog subfamily A member 1                                                 | 1.27 | 0.178 | 2.7E-01 | 3  | 6.8  |
| P21266 | Glutathione S-transferase Mu 3                                                    | 1.27 | NA    | NA      | 2  | 8.4  |
| P14868 | Aspartate-tRNA ligase, cytoplasmic                                                | 1.26 | 0.207 | 1.2E-01 | 5  | 13.2 |
| P51532 | Transcription activator BRG1                                                      | 1.26 | NA    | NA      | 2  | 1.7  |
| Q13011 | Delta(3,5)-Delta(2,4)-dienoyl-CoA isomerase, mitochondrial                        | 1.26 | 0.221 | 1.7E-01 | 3  | 7.6  |
| Q15063 | Periostin                                                                         | 1.26 | 0.044 | 7.5E-03 | 4  | 6.5  |
| Q99798 | Aconitate hydratase, mitochondrial                                                | 1.26 | 0.483 | 9.8E-02 | 7  | 13.3 |
| P49588 | Alanine-tRNA ligase, cytoplasmic                                                  | 1.25 | NA    | NA      | 2  | 3.2  |
| P00747 | Plasminogen                                                                       | 1.25 | 0.084 | 3.9E-02 | 9  | 14.9 |
| P08574 | Cytochrome c1, heme protein, mitochondrial                                        | 1.25 | 0.125 | 3.3E-02 | 4  | 17.2 |
| P53597 | Succinyl-CoA ligase [ADP/GDP-forming] subunit alpha, mitochondrial                | 1.25 | NA    | NA      | 2  | 6.9  |
| P37108 | Signal recognition particle 14 kDa protein                                        | 1.25 | 0.202 | 3.5E-01 | 3  | 24.3 |
| P46782 | 40S ribosomal protein S5                                                          | 1.24 | 0.048 | 1.1E-02 | 4  | 16.2 |
| O15145 | Actin-related protein 2/3 complex subunit 3                                       | 1.24 | NA    | NA      | 2  | 9.6  |
| Q86VP6 | Cullin-associated NEDD8-dissociated protein 1                                     | 1.24 | NA    | NA      | 2  | 1.9  |
| P30153 | Serine/threonine-protein phosphatase 2A 65 kDa regulatory subunit A alpha isoform | 1.24 | 0.032 | 3.5E-02 | 3  | 7.0  |
| P08195 | 4F2 cell-surface antigen heavy chain                                              | 1.24 | 0.128 | 6.8E-02 | 5  | 9.0  |
| P62241 | 40S ribosomal protein S8                                                          | 1.23 | 0.111 | 1.3E-01 | 3  | 11.5 |
| Q07065 | Cytoskeleton-associated protein 4                                                 | 1.22 | 0.675 | 1.5E-01 | 10 | 21.9 |
| Q5JTV8 | Torsin-1A-interacting protein 1                                                   | 1.22 | 0.104 | 1.7E-01 | 3  | 5.7  |
| Q9NP81 | Serine-tRNA ligase, mitochondrial                                                 | 1.22 | NA    | NA      | 2  | 6.9  |
| P67936 | Tropomyosin alpha-4 chain                                                         | 1.22 | 0.218 | 7.3E-02 | 6  | 23.0 |
| P62753 | 40S ribosomal protein S6                                                          | 1.22 | 0.153 | 8.6E-02 | 3  | 12.9 |
| P49411 | Elongation factor Tu, mitochondrial                                               | 1.22 | 0.096 | 3.5E-02 | 13 | 32.7 |
| Q13363 | C-terminal-binding protein 1                                                      | 1.21 | NA    | NA      | 2  | 4.3  |
| P61158 | Actin-related protein 3                                                           | 1.21 | 0.038 | 4.5E-03 | 5  | 13.9 |
| O15144 | Actin-related protein 2/3 complex subunit 2                                       | 1.21 | 1.034 | 4.3E-01 | 5  | 17.0 |

Table S15-Sample UM15

|        |                                                                                |      |        |         |    |      |
|--------|--------------------------------------------------------------------------------|------|--------|---------|----|------|
| Q13547 | Histone deacetylase 1                                                          | 1.20 | NA     | NA      | 2  | 4.1  |
| P22314 | Ubiquitin-like modifier-activating enzyme 1                                    | 1.20 | 0.105  | 1.4E-01 | 7  | 7.7  |
| Q05682 | Caldesmon                                                                      | 1.20 | 0.636  | 3.4E-01 | 5  | 8.8  |
| Q9Y512 | Sorting and assembly machinery component 50 homolog                            | 1.20 | NA     | NA      | 2  | 3.8  |
| P27797 | Calreticulin                                                                   | 1.20 | 1.188  | 5.0E-01 | 8  | 22.3 |
| P40227 | T-complex protein 1 subunit zeta                                               | 1.20 | 0.067  | 6.0E-02 | 6  | 12.8 |
| Q9BVJ6 | U3 small nucleolar RNA-associated protein 14 homolog A                         | 1.20 | NA     | NA      | 2  | 4.0  |
| P62917 | 60S ribosomal protein L8                                                       | 1.20 | NA     | NA      | 2  | 10.5 |
| Q5H9R7 | Serine/threonine-protein phosphatase 6 regulatory subunit 3                    | 1.19 | NA     | NA      | 2  | 2.6  |
| P09012 | U1 small nuclear ribonucleoprotein A                                           | 1.19 | NA     | NA      | 2  | 7.4  |
| O94826 | Mitochondrial import receptor subunit TOM70                                    | 1.19 | 0.465  | 2.9E-01 | 5  | 9.7  |
| P19367 | Hexokinase-1                                                                   | 1.19 | 0.117  | 2.0E-01 | 5  | 6.0  |
| Q15008 | 26S proteasome non-ATPase regulatory subunit 6                                 | 1.19 | NA     | NA      | 2  | 5.4  |
| Q9NTJ5 | Phosphatidylinositol phosphatase SAC1                                          | 1.19 | 0.150  | 1.3E-01 | 4  | 7.2  |
| P20340 | Ras-related protein Rab-6A                                                     | 1.18 | NA     | NA      | 2  | 10.6 |
| Q9BVK6 | Transmembrane emp24 domain-containing protein 9                                | 1.18 | 0.283  | 3.4E-01 | 3  | 10.6 |
| P09669 | Cytochrome c oxidase subunit 6C                                                | 1.18 | 0.165  | 2.7E-01 | 3  | 32.0 |
| P15691 | Microtubule-associated protein RP/EB family member 1                           | 1.18 | 0.030  | 1.4E-02 | 3  | 8.6  |
| P62701 | 40S ribosomal protein S4, X isoform                                            | 1.18 | 0.173  | 1.6E-01 | 7  | 24.3 |
| Q63HN8 | E3 ubiquitin-protein ligase RNF213                                             | 1.18 | NA     | NA      | 2  | 0.4  |
| P42765 | 3-ketoacyl-CoA thiolase, mitochondrial                                         | 1.18 | 0.258  | 2.0E-01 | 6  | 18.9 |
| P28838 | Cytosol aminopeptidase                                                         | 1.18 | 0.475  | 6.3E-01 | 6  | 15.2 |
| Q9BQG0 | Myb-binding protein 1A                                                         | 1.18 | NA     | NA      | 2  | 2.0  |
| O43399 | Tumor protein D54                                                              | 1.17 | NA     | NA      | 2  | 7.8  |
| Q8N5K1 | CDGSH iron-sulfur domain-containing protein 2                                  | 1.17 | 0.097  | 1.5E-01 | 3  | 26.7 |
| P35637 | RNA-binding protein FUS                                                        | 1.17 | 0.386  | 2.5E-01 | 3  | 6.8  |
| Q9UQE7 | Structural maintenance of chromosomes protein 3                                | 1.16 | NA     | NA      | 2  | 1.4  |
| Q96HE7 | ERO1-like protein alpha                                                        | 1.16 | NA     | NA      | 2  | 5.3  |
| P14927 | Cytochrome b-c1 complex subunit 7                                              | 1.16 | 0.176  | 3.9E-01 | 3  | 28.8 |
| Q16851 | UTP--glucose-1-phosphate uridylyltransferase                                   | 1.16 | 0.883  | 4.1E-01 | 7  | 15.4 |
| Q8NC56 | LEM domain-containing protein 2                                                | 1.16 | 0.041  | 3.3E-02 | 6  | 11.3 |
| P48047 | ATP synthase subunit O, mitochondrial                                          | 1.15 | 0.856  | 1.6E-01 | 5  | 30.0 |
| P51572 | B-cell receptor-associated protein 31                                          | 1.15 | 0.167  | 2.5E-01 | 7  | 25.6 |
| Q06568 | Procollagen-lysine, 2-oxoglutarate 5-dioxygenase 3                             | 1.15 | NA     | NA      | 2  | 4.6  |
| Q15029 | 116 kDa U5 small nuclear ribonucleoprotein component                           | 1.15 | 0.061  | 1.1E-01 | 3  | 3.4  |
| P13073 | Cytochrome c oxidase subunit 4 isoform 1, mitochondrial                        | 1.15 | 0.085  | 6.8E-02 | 4  | 25.4 |
| P07237 | Protein disulfide-isomerase                                                    | 1.15 | 0.176  | 1.0E-01 | 13 | 21.5 |
| Q15084 | Protein disulfide-isomerase A6                                                 | 1.14 | 0.248  | 1.5E-01 | 8  | 25.9 |
| P25685 | DnaJ homolog subfamily B member 1                                              | 1.14 | NA     | NA      | 2  | 6.8  |
| O60664 | Penlipin-3                                                                     | 1.13 | NA     | NA      | 2  | 7.4  |
| P36776 | Lon protease homolog, mitochondrial                                            | 1.13 | NA     | NA      | 2  | 2.7  |
| Q13162 | Peroxisredoxin-4                                                               | 1.13 | NA     | NA      | 2  | 8.9  |
| O60716 | Catenin delta-1                                                                | 1.13 | 1.751  | 7.6E-01 | 3  | 4.1  |
| Q9GZR7 | ATP-dependent RNA helicase DDX24                                               | 1.13 | 0.624  | 5.6E-01 | 3  | 5.0  |
| O75915 | PRA1 family protein 3                                                          | 1.12 | 0.377  | 7.8E-01 | 3  | 19.7 |
| Q00765 | Receptor expression-enhancing protein 5                                        | 1.12 | 0.397  | 6.9E-01 | 3  | 10.6 |
| P48735 | Isocitrate dehydrogenase [NADP], mitochondrial                                 | 1.12 | 0.218  | 3.7E-01 | 8  | 19.0 |
| Q86UP2 | Kinectin                                                                       | 1.12 | 0.191  | 5.0E-01 | 6  | 5.5  |
| P11234 | Ras-related protein Ral-B                                                      | 1.12 | NA     | NA      | 2  | 12.1 |
| O94906 | Pre-mRNA-processing factor 6                                                   | 1.12 | NA     | NA      | 2  | 3.0  |
| P68871 | Hemoglobin subunit beta                                                        | 1.12 | 0.459  | 1.8E-01 | 4  | 32.0 |
| Q92542 | Nicastrin                                                                      | 1.12 | NA     | NA      | 2  | 2.7  |
| P30740 | Leukocyte elastase inhibitor                                                   | 1.11 | 0.835  | 5.9E-01 | 4  | 14.5 |
| P46940 | Ras GTPase-activating-like protein IQGAP1                                      | 1.11 | 0.392  | 4.8E-01 | 6  | 4.0  |
| P51810 | G-protein coupled receptor 143                                                 | 1.11 | 0.205  | 4.1E-01 | 3  | 9.9  |
| Q02818 | Nucleobindin-1                                                                 | 1.10 | 0.192  | 4.3E-01 | 4  | 11.7 |
| P35659 | Protein DEK                                                                    | 1.10 | NA     | NA      | 2  | 6.9  |
| P05091 | Aldehyde dehydrogenase, mitochondrial                                          | 1.10 | 0.254  | 4.3E-01 | 5  | 10.6 |
| Q9NX63 | Coiled-coil-helix-coiled-coil-helix domain-containing protein 3, mitochondrial | 1.10 | 0.406  | 4.9E-01 | 3  | 12.3 |
| P51148 | Ras-related protein Rab-5C                                                     | 1.09 | NA     | NA      | 2  | 10.6 |
| Q99832 | T-complex protein 1 subunit eta                                                | 1.09 | 0.035  | 6.5E-02 | 6  | 11.4 |
| Q14152 | Eukaryotic translation initiation factor 3 subunit A                           | 1.09 | 0.177  | 5.7E-01 | 10 | 8.7  |
| Q9NSE4 | Isoleucine--tRNA ligase, mitochondrial                                         | 1.09 | 0.234  | 6.4E-01 | 5  | 7.1  |
| O15511 | Actin-related protein 2/3 complex subunit 5                                    | 1.09 | NA     | NA      | 2  | 11.9 |
| O00571 | ATP-dependent RNA helicase DDX3X                                               | 1.08 | 3.908  | 8.5E-01 | 3  | 5.7  |
| P22307 | Non-specific lipid-transfer protein                                            | 1.08 | 0.344  | 8.4E-01 | 3  | 4.8  |
| P62081 | 40S ribosomal protein S7                                                       | 1.08 | NA     | NA      | 2  | 9.3  |
| P47985 | Cytochrome b-c1 complex subunit Rieske, mitochondrial                          | 1.08 | 0.060  | 2.2E-01 | 3  | 11.3 |
| P46977 | Dolichyl-diphosphooligosaccharide--protein glycosyltransferase subunit STT3A   | 1.07 | NA     | NA      | 2  | 2.3  |
| P62244 | 40S ribosomal protein S15a                                                     | 1.07 | 0.097  | 3.0E-01 | 4  | 29.2 |
| P27708 | CAD protein                                                                    | 1.07 | NA     | NA      | 2  | 0.9  |
| P49458 | Signal recognition particle 9 kDa protein                                      | 1.07 | NA     | NA      | 2  | 22.1 |
| P46781 | 40S ribosomal protein S9                                                       | 1.07 | 0.618  | 7.6E-01 | 6  | 27.3 |
| P78347 | General transcription factor II-I                                              | 1.07 | 0.847  | 8.3E-01 | 4  | 4.0  |
| P50990 | T-complex protein 1 subunit theta                                              | 1.07 | 0.101  | 2.5E-01 | 13 | 24.8 |
| P04844 | Dolichyl-diphosphooligosaccharide--protein glycosyltransferase subunit 2       | 1.06 | NA     | NA      | 2  | 4.1  |
| O60271 | C-Jun-amino-terminal kinase-interacting protein 4                              | 1.06 | NA     | NA      | 2  | 2.1  |
| P63279 | SUMO-conjugating enzyme UBC9                                                   | 1.06 | 0.171  | 6.6E-01 | 3  | 22.8 |
| O75131 | Copine-3                                                                       | 1.06 | 11.287 | 7.4E-01 | 4  | 6.7  |
| Q9Y6C9 | Mitochondrial carrier homolog 2                                                | 1.06 | NA     | NA      | 2  | 11.2 |
| P09525 | Annexin A4                                                                     | 1.06 | 0.245  | 5.4E-01 | 8  | 23.8 |
| Q14956 | Transmembrane glycoprotein NMB                                                 | 1.06 | 0.938  | 8.5E-01 | 5  | 10.0 |
| P82909 | 28S ribosomal protein S36, mitochondrial                                       | 1.06 | NA     | NA      | 2  | 24.3 |
| P61160 | Actin-related protein 2                                                        | 1.06 | 0.210  | 4.2E-01 | 6  | 17.3 |
| P22695 | Cytochrome b-c1 complex subunit 2, mitochondrial                               | 1.06 | 1.318  | 7.5E-01 | 6  | 18.3 |
| P01857 | Ig gamma-1 chain C region                                                      | 1.05 | NA     | NA      | 2  | 7.9  |
| O95292 | Vesicle-associated membrane protein-associated protein B/C                     | 1.05 | 0.490  | 7.8E-01 | 4  | 21.0 |
| Q06830 | Peroxisredoxin-1                                                               | 1.05 | 0.764  | 6.0E-01 | 8  | 36.7 |
| O60814 | Histone H2B type 1-K                                                           | 1.05 | NA     | NA      | 2  | 7.9  |
| O75323 | Protein NipSnap homolog 2                                                      | 1.04 | NA     | NA      | 2  | 8.7  |
| Q9H2G2 | STE20-like serine/threonine-protein kinase                                     | 1.04 | 0.629  | 8.7E-01 | 3  | 3.0  |
| P01892 | HLA class I histocompatibility antigen, A-2 alpha chain                        | 1.04 | 1.390  | 8.5E-01 | 4  | 13.7 |
| P59998 | Actin-related protein 2/3 complex subunit 4                                    | 1.04 | 0.452  | 6.5E-01 | 3  | 16.1 |
| P31942 | Heterogeneous nuclear ribonucleoprotein H3                                     | 1.04 | 0.238  | 8.0E-01 | 3  | 11.3 |
| P30405 | Peptidyl-prolyl cis-trans isomerase F, mitochondrial                           | 1.04 | NA     | NA      | 2  | 8.7  |
| P19823 | Inter-alpha-trypsin inhibitor heavy chain H2                                   | 1.04 | NA     | NA      | 2  | 2.4  |
| P47897 | Glutamine--tRNA ligase                                                         | 1.04 | 0.175  | 7.9E-01 | 3  | 3.9  |
| Q99733 | Nucleosome assembly protein 1-like 4                                           | 1.03 | NA     | NA      | 2  | 7.7  |
| P49368 | T-complex protein 1 subunit gamma                                              | 1.03 | 0.145  | 6.5E-01 | 9  | 20.0 |
| Q15370 | Transcription elongation factor B polypeptide 2                                | 1.02 | 0.779  | 8.5E-01 | 3  | 23.7 |
| P31930 | Cytochrome b-c1 complex subunit 1, mitochondrial                               | 1.02 | 5.017  | 8.8E-01 | 4  | 9.8  |
| P53990 | IST1 homolog                                                                   | 1.02 | NA     | NA      | 2  | 5.5  |
| P20810 | Calpastatin                                                                    | 1.02 | 0.950  | 9.8E-01 | 3  | 6.2  |
| Q00325 | Phosphate carrier protein, mitochondrial                                       | 1.02 | 0.132  | 7.9E-01 | 5  | 12.2 |
| P78371 | T-complex protein 1 subunit beta                                               | 1.02 | 0.909  | 9.1E-01 | 9  | 17.9 |
| P30049 | ATP synthase subunit delta, mitochondrial                                      | 1.01 | NA     | NA      | 2  | 13.7 |
| Q13200 | 26S proteasome non-ATPase regulatory subunit 2                                 | 1.01 | 0.385  | 9.6E-01 | 3  | 3.4  |
| P30048 | Thioredoxin-dependent peroxide reductase, mitochondrial                        | 1.01 | 0.272  | 9.3E-01 | 5  | 20.3 |
| Q9Y394 | Dehydrogenase/reductase SDR family member 7                                    | 1.01 | NA     | NA      | 2  | 5.0  |
| O43390 | Heterogeneous nuclear ribonucleoprotein R                                      | 1.01 | 0.396  | 9.6E-01 | 6  | 11.5 |
| Q14980 | Nuclear mitotic apparatus protein 1                                            | 1.01 | 0.435  | 9.1E-01 | 5  | 3.3  |
| P02786 | Transferrin receptor protein 1                                                 | 1.00 | NA     | NA      | 2  | 3.2  |
| Q8N1G4 | Leucine-rich repeat-containing protein 47                                      | 1.00 | 1.001  | 9.9E-01 | 3  | 6.7  |
| P36955 | Pigment epithelium-derived factor                                              | 1.00 | NA     | NA      | 2  | 5.7  |
| P51812 | Ribosomal protein S6 kinase alpha-3                                            | 1.00 | 5.093  | 1.0E+00 | 3  | 4.1  |

Table S15-Sample UM15

|        |                                                                               |      |        |         |    |      |
|--------|-------------------------------------------------------------------------------|------|--------|---------|----|------|
| P08237 | ATP-dependent 6-phosphofructokinase, muscle type                              | 0.99 | 1.158  | 9.7E-01 | 5  | 7.8  |
| Q7L014 | Probable ATP-dependent RNA helicase DDX46                                     | 0.99 | 0.424  | 9.8E-01 | 3  | 2.8  |
| O75947 | ATP synthase subunit d, mitochondrial                                         | 0.99 | 2.037  | 9.7E-01 | 4  | 22.4 |
| P55884 | Eukaryotic translation initiation factor 3 subunit B                          | 0.99 | NA     | NA      | 2  | 2.3  |
| P22061 | Protein-L-isoaspartate(D-aspartate) O-methyltransferase                       | 0.99 | NA     | NA      | 2  | 13.2 |
| O95202 | LETM1 and EF-hand domain-containing protein 1, mitochondrial                  | 0.99 | NA     | NA      | 2  | 3.9  |
| O75832 | 26S proteasome non-ATPase regulatory subunit 10                               | 0.99 | NA     | NA      | 2  | 11.9 |
| P48643 | T-complex protein 1 subunit epsilon                                           | 0.99 | 1.585  | 8.4E-01 | 14 | 21.8 |
| P13674 | Prolyl 4-hydroxylase subunit alpha-1                                          | 0.99 | NA     | NA      | 2  | 5.8  |
| P21291 | Cysteine and glycine-rich protein 1                                           | 0.98 | NA     | NA      | 2  | 22.8 |
| Q8TD19 | Serine/threonine-protein kinase Nek9                                          | 0.98 | NA     | NA      | 2  | 2.2  |
| P54136 | Arginine-tRNA ligase, cytoplasmic                                             | 0.98 | 0.496  | 9.0E-01 | 3  | 5.5  |
| O00264 | Membrane-associated progesterone receptor component 1                         | 0.98 | 0.725  | 9.1E-01 | 4  | 16.4 |
| P09914 | Interferon-induced protein with tetratricopeptide repeats 1                   | 0.98 | 3.223  | 9.5E-01 | 3  | 8.8  |
| P30626 | Sorcin                                                                        | 0.98 | NA     | NA      | 2  | 10.6 |
| P31040 | Succinate dehydrogenase [ubiquinone] flavoprotein subunit, mitochondrial      | 0.97 | 0.626  | 9.3E-01 | 4  | 9.0  |
| Q3ZCQ8 | Mitochondrial import inner membrane translocase subunit TIM50                 | 0.97 | NA     | NA      | 2  | 5.1  |
| Q9Y230 | RuvB-like 2                                                                   | 0.97 | 0.364  | 8.3E-01 | 3  | 7.3  |
| P53618 | Coatomer subunit beta                                                         | 0.97 | 0.129  | 8.5E-01 | 4  | 4.9  |
| Q9BSF4 | Uncharacterized protein C19orf52                                              | 0.97 | NA     | NA      | 2  | 11.5 |
| P0C0S5 | Histone H2A.Z                                                                 | 0.97 | 0.176  | 7.1E-01 | 4  | 31.3 |
| Q9P0M6 | Core histone macro-H2A.2                                                      | 0.96 | 2.553  | 9.1E-01 | 3  | 12.6 |
| P49591 | Serine-tRNA ligase, cytoplasmic                                               | 0.96 | NA     | NA      | 2  | 5.3  |
| P02647 | Apolipoprotein A-I                                                            | 0.96 | 0.902  | 7.0E-01 | 4  | 15.4 |
| Q9BXF6 | Rab11 family-interacting protein 5                                            | 0.96 | NA     | NA      | 2  | 4.6  |
| P50502 | Hsc70-interacting protein                                                     | 0.96 | 0.847  | 9.0E-01 | 3  | 7.0  |
| Q16698 | 2,4-dienoyl-CoA reductase, mitochondrial                                      | 0.95 | 0.411  | 9.3E-01 | 3  | 10.7 |
| Q52LJ0 | Protein FAM98B                                                                | 0.95 | NA     | NA      | 2  | 7.0  |
| P12268 | Inosine-5'-monophosphate dehydrogenase 2                                      | 0.95 | 0.045  | 3.0E-01 | 3  | 9.1  |
| P14314 | Glucosidase 2 subunit beta                                                    | 0.95 | 18.388 | 6.1E-01 | 5  | 9.8  |
| O43678 | NADH dehydrogenase [ubiquinone] 1 alpha subcomplex subunit 2                  | 0.95 | NA     | NA      | 2  | 11.1 |
| Q14315 | Filamin-C                                                                     | 0.95 | NA     | NA      | 2  | 1.0  |
| Q9P0K7 | Ankyrin                                                                       | 0.94 | NA     | NA      | 2  | 1.8  |
| Q93050 | V-type proton ATPase 116 kDa subunit a isoform 1                              | 0.94 | 0.119  | 5.9E-01 | 4  | 6.6  |
| P01009 | Alpha-1-antitrypsin                                                           | 0.94 | 0.457  | 6.4E-01 | 10 | 22.7 |
| O75306 | NADH dehydrogenase [ubiquinone] iron-sulfur protein 2, mitochondrial          | 0.94 | 0.022  | 1.1E-01 | 3  | 6.7  |
| Q14683 | Structural maintenance of chromosomes protein 1A                              | 0.94 | 0.226  | 5.7E-01 | 4  | 4.0  |
| P51608 | Methyl-CpG-binding protein 2                                                  | 0.94 | 0.228  | 5.5E-01 | 3  | 8.0  |
| Q14697 | Neutral alpha-glucosidase AB                                                  | 0.93 | 0.164  | 5.6E-01 | 10 | 10.8 |
| Q6P2Q9 | Pre-mRNA-processing-splicing factor 8                                         | 0.93 | 0.123  | 4.3E-01 | 3  | 1.3  |
| P04843 | Dolichyl-diphosphooligosaccharide--protein glycosyltransferase subunit 1      | 0.93 | 0.120  | 4.0E-01 | 12 | 22.6 |
| P38117 | Electron transfer flavoprotein subunit beta                                   | 0.93 | NA     | NA      | 2  | 7.8  |
| Q8NBS9 | Thioredoxin domain-containing protein 5                                       | 0.93 | 3.633  | 6.6E-01 | 5  | 10.0 |
| P05090 | Apolipoprotein D                                                              | 0.93 | 0.239  | 6.1E-01 | 3  | 16.4 |
| Q8IVF2 | Protein AHNK2                                                                 | 0.93 | NA     | NA      | 2  | 0.4  |
| P40763 | Signal transducer and activator of transcription 3                            | 0.93 | 2.009  | 8.7E-01 | 3  | 3.9  |
| P09496 | Clathrin light chain A                                                        | 0.92 | 0.216  | 3.3E-01 | 4  | 12.5 |
| P50991 | T-complex protein 1 subunit delta                                             | 0.92 | 0.630  | 4.5E-01 | 7  | 16.3 |
| Q96TC7 | Regulator of microtubule dynamics protein 3                                   | 0.91 | NA     | NA      | 2  | 4.0  |
| O75340 | Programmed cell death protein 6                                               | 0.91 | NA     | NA      | 2  | 9.9  |
| Q53H12 | Acylglycerol kinase, mitochondrial                                            | 0.91 | NA     | NA      | 2  | 5.9  |
| Q9UIQ6 | Leucyl-cystinyl aminopeptidase                                                | 0.91 | NA     | NA      | 2  | 2.7  |
| P62979 | Ubiquitin-40S ribosomal protein S27a                                          | 0.91 | 0.262  | 2.4E-01 | 9  | 41.0 |
| P06576 | ATP synthase subunit beta, mitochondrial                                      | 0.90 | 0.139  | 6.1E-02 | 11 | 26.5 |
| P11021 | 78 kDa glucose-regulated protein                                              | 0.90 | 0.139  | 9.5E-02 | 17 | 25.8 |
| P43490 | Nicotinamide phosphoribosyltransferase                                        | 0.89 | 0.958  | 7.6E-01 | 4  | 8.4  |
| P16435 | NADPH-cytochrome P450 reductase                                               | 0.89 | 0.168  | 4.0E-01 | 3  | 5.8  |
| Q15293 | Reticulocalbin-1                                                              | 0.89 | 0.317  | 5.0E-01 | 4  | 11.5 |
| Q15413 | Ryanodine receptor 3                                                          | 0.89 | NA     | NA      | 2  | 0.3  |
| P43886 | 26S protease regulatory subunit 6B                                            | 0.88 | 0.137  | 2.9E-01 | 3  | 8.4  |
| P10606 | Cytochrome c oxidase subunit 5B, mitochondrial                                | 0.88 | 0.099  | 1.0E-01 | 6  | 31.0 |
| P61586 | Transforming protein RhoA                                                     | 0.88 | 0.114  | 1.2E-01 | 3  | 10.4 |
| P01834 | Ig kappa chain C region                                                       | 0.88 | 0.203  | 3.0E-01 | 3  | 48.1 |
| P07384 | Calpain-1 catalytic subunit                                                   | 0.87 | 0.126  | 2.3E-01 | 3  | 4.8  |
| P02545 | Prelamin-A/C                                                                  | 0.87 | 0.102  | 4.0E-03 | 33 | 46.5 |
| P21912 | Succinate dehydrogenase [ubiquinone] iron-sulfur subunit, mitochondrial       | 0.87 | 0.147  | 2.1E-01 | 3  | 11.4 |
| P63000 | Ras-related C3 botulinum toxin substrate 1                                    | 0.87 | 0.097  | 2.0E-01 | 4  | 24.5 |
| P00505 | Aspartate aminotransferase, mitochondrial                                     | 0.86 | 0.180  | 1.3E-01 | 5  | 13.5 |
| Q15075 | Early endosome antigen 1                                                      | 0.86 | NA     | NA      | 2  | 1.8  |
| P14625 | Endoplasmic reticulum chaperone protein                                       | 0.86 | 0.089  | 8.8E-03 | 17 | 21.5 |
| O00429 | Dynamin-1-like protein                                                        | 0.86 | NA     | NA      | 2  | 3.5  |
| P04040 | Catalase                                                                      | 0.86 | 0.063  | 1.7E-01 | 4  | 10.1 |
| P51116 | Fragile X mental retardation syndrome-related protein 2                       | 0.86 | NA     | NA      | 2  | 4.0  |
| P36542 | ATP synthase subunit gamma, mitochondrial                                     | 0.86 | NA     | NA      | 2  | 7.0  |
| P67870 | Casein kinase II subunit beta                                                 | 0.86 | 0.996  | 6.1E-01 | 3  | 12.6 |
| P17987 | T-complex protein 1 subunit alpha                                             | 0.86 | 0.153  | 8.1E-02 | 7  | 13.3 |
| Q9UGP8 | Translocation protein SEC63 homolog                                           | 0.86 | NA     | NA      | 2  | 3.0  |
| P11177 | Pyruvate dehydrogenase E1 component subunit beta, mitochondrial               | 0.85 | NA     | NA      | 2  | 4.2  |
| Q8N0X7 | Spartin                                                                       | 0.85 | NA     | NA      | 2  | 3.2  |
| Q9UHD8 | Septin-9                                                                      | 0.85 | 0.198  | 3.5E-01 | 5  | 11.1 |
| Q14108 | Lysosome membrane protein 2                                                   | 0.85 | 0.201  | 2.5E-01 | 3  | 6.3  |
| P29966 | Myristoylated alanine-rich C-kinase substrate                                 | 0.85 | 0.333  | 6.6E-01 | 5  | 22.0 |
| P26038 | Moesin                                                                        | 0.85 | 0.076  | 3.0E-02 | 8  | 13.0 |
| P40939 | Trifunctional enzyme subunit alpha, mitochondrial                             | 0.85 | 0.190  | 2.7E-01 | 14 | 20.4 |
| Q01844 | RNA-binding protein EWS                                                       | 0.84 | 0.219  | 3.1E-01 | 3  | 3.4  |
| P13667 | Protein disulfide-isomerase A4                                                | 0.84 | 0.342  | 2.7E-01 | 8  | 14.7 |
| O96000 | NADH dehydrogenase [ubiquinone] 1 beta subcomplex subunit 10                  | 0.84 | NA     | NA      | 2  | 12.2 |
| P43304 | Glycerol-3-phosphate dehydrogenase, mitochondrial                             | 0.84 | 0.113  | 1.4E-01 | 4  | 6.5  |
| P04632 | Calpain small subunit 1                                                       | 0.84 | 0.057  | 1.7E-02 | 5  | 16.0 |
| Q8IZP0 | Abl interactor 1                                                              | 0.84 | NA     | NA      | 2  | 4.9  |
| Q13561 | Dynactin subunit 2                                                            | 0.83 | 0.210  | 3.1E-01 | 4  | 12.2 |
| P17858 | ATP-dependent 6-phosphofructokinase, liver type                               | 0.83 | 0.099  | 1.4E-01 | 4  | 6.9  |
| A1L0T0 | Acetolactate synthase-like protein                                            | 0.83 | NA     | NA      | 2  | 5.1  |
| P25705 | ATP synthase subunit alpha, mitochondrial                                     | 0.83 | 0.092  | 6.6E-03 | 16 | 31.1 |
| P24539 | ATP synthase F(0) complex subunit B1, mitochondrial                           | 0.83 | 0.100  | 1.5E-01 | 3  | 13.7 |
| P01042 | Kinogen-1                                                                     | 0.82 | NA     | NA      | 2  | 1.4  |
| P43307 | Translocon-associated protein subunit alpha                                   | 0.82 | NA     | NA      | 2  | 6.6  |
| P61225 | Ras-related protein Rap-2b                                                    | 0.81 | NA     | NA      | 2  | 10.4 |
| P49257 | Protein ERGIC-53                                                              | 0.81 | 0.051  | 4.2E-02 | 3  | 8.0  |
| P15311 | Ezrin                                                                         | 0.81 | 0.154  | 3.2E-01 | 3  | 3.8  |
| P60953 | Cell division control protein 42 homolog                                      | 0.80 | NA     | NA      | 2  | 12.6 |
| P07951 | Tropomyosin beta chain                                                        | 0.80 | NA     | NA      | 2  | 7.0  |
| Q7L5N1 | COP9 signalosome complex subunit 6                                            | 0.80 | 0.025  | 1.7E-02 | 3  | 10.4 |
| Q96N67 | Dedicator of cytokinesis protein 7                                            | 0.80 | 0.517  | 6.3E-01 | 3  | 2.0  |
| P13861 | cAMP-dependent protein kinase type II-alpha regulatory subunit                | 0.79 | 0.256  | 8.9E-02 | 5  | 15.1 |
| Q9BRX8 | Redox-regulatory protein FAM213A                                              | 0.79 | NA     | NA      | 2  | 8.7  |
| Q99805 | Transmembrane 9 superfamily member 2                                          | 0.79 | NA     | NA      | 2  | 3.5  |
| P10644 | cAMP-dependent protein kinase type I-alpha regulatory subunit                 | 0.79 | NA     | NA      | 2  | 5.5  |
| P00390 | Glutathione reductase, mitochondrial                                          | 0.78 | NA     | NA      | 2  | 5.7  |
| P39656 | Dolichyl-diphosphooligosaccharide--protein glycosyltransferase 48 kDa subunit | 0.78 | 0.067  | 2.0E-02 | 5  | 10.7 |
| Q13596 | Sorting nexin-1                                                               | 0.78 | 0.180  | 2.9E-01 | 3  | 7.1  |
| P26196 | Probable ATP-dependent RNA helicase DDX6                                      | 0.77 | 0.090  | 4.2E-02 | 3  | 9.3  |
| P20674 | Cytochrome c oxidase subunit 5A, mitochondrial                                | 0.77 | 0.227  | 3.8E-01 | 5  | 25.3 |
| P42566 | Epidermal growth factor receptor substrate 15                                 | 0.76 | NA     | NA      | 2  | 3.2  |
| Q99714 | 3-hydroxyacyl-CoA dehydrogenase type-2                                        | 0.76 | NA     | NA      | 2  | 7.7  |

Table S15-Sample UM15

|        |                                                                                                                 |      |       |         |    |      |
|--------|-----------------------------------------------------------------------------------------------------------------|------|-------|---------|----|------|
| Q8IYB3 | Serine/arginine repetitive matrix protein 1                                                                     | 0.76 | NA    | NA      | 2  | 2.4  |
| O60256 | Phosphoribosyl pyrophosphate synthase-associated protein 2                                                      | 0.76 | NA    | NA      | 2  | 8.1  |
| P36957 | Dihydropolyllysine-residue succinyltransferase component of 2-oxoglutarate dehydrogenase complex, mitochondrial | 0.76 | 0.059 | 4.4E-04 | 6  | 14.3 |
| Q8IUX7 | Adipocyte enhancer-binding protein 1                                                                            | 0.75 | NA    | NA      | 2  | 2.8  |
| O43837 | Isocitrate dehydrogenase [NAD] subunit beta, mitochondrial                                                      | 0.75 | NA    | NA      | 2  | 5.5  |
| P17643 | 5,6-dihydroxyindole-2-carboxylic acid oxidase                                                                   | 0.74 | 0.121 | 9.5E-02 | 5  | 11.5 |
| P61769 | Beta-2-microglobulin                                                                                            | 0.74 | NA    | NA      | 2  | 16.8 |
| Q9BQE3 | Tubulin alpha-1C chain                                                                                          | 0.73 | 0.159 | 2.8E-02 | 4  | 12.0 |
| Q9NY61 | Protein AATF                                                                                                    | 0.73 | NA    | NA      | 2  | 5.0  |
| P51665 | 26S proteasome non-ATPase regulatory subunit 7                                                                  | 0.73 | NA    | NA      | 2  | 6.2  |
| O00487 | 26S proteasome non-ATPase regulatory subunit 14                                                                 | 0.72 | NA    | NA      | 2  | 6.5  |
| P18859 | ATP synthase-coupling factor 6, mitochondrial                                                                   | 0.72 | NA    | NA      | 2  | 13.0 |
| Q00577 | Transcriptional activator protein Pur-alpha                                                                     | 0.72 | NA    | NA      | 2  | 5.0  |
| Q5JWF2 | Guanine nucleotide-binding protein G(s) subunit alpha isoforms XLas                                             | 0.72 | 0.241 | 1.3E-01 | 3  | 4.0  |
| Q9Y277 | Voltage-dependent anion-selective channel protein 3                                                             | 0.72 | NA    | NA      | 2  | 6.7  |
| Q14789 | Golgin subfamily B member 1                                                                                     | 0.72 | NA    | NA      | 2  | 0.9  |
| P05107 | Integrin beta-2                                                                                                 | 0.72 | NA    | NA      | 2  | 2.9  |
| Q16795 | NADH dehydrogenase [ubiquinone] 1 alpha subcomplex subunit 9, mitochondrial                                     | 0.72 | NA    | NA      | 2  | 6.4  |
| Q9P2R7 | Succinyl-CoA ligase [ADP-forming] subunit beta, mitochondrial                                                   | 0.71 | NA    | NA      | 2  | 4.3  |
| Q9UHG3 | Prelycysteine oxidase 1                                                                                         | 0.71 | 0.134 | 4.9E-02 | 6  | 15.4 |
| P11310 | Medium-chain specific acyl-CoA dehydrogenase, mitochondrial                                                     | 0.71 | NA    | NA      | 2  | 5.5  |
| O60313 | Dynamin-like 120 kDa protein, mitochondrial                                                                     | 0.71 | 0.084 | 3.2E-02 | 6  | 7.9  |
| P54727 | UV excision repair protein RAD23 homolog B                                                                      | 0.71 | 0.057 | 4.0E-02 | 3  | 7.3  |
| Q9Y3Z3 | Deoxynucleoside triphosphate triphosphohydrolase SAMHD1                                                         | 0.70 | NA    | NA      | 2  | 5.1  |
| Q9Y3I0 | tRNA-splicing ligase RtcB homolog                                                                               | 0.70 | 0.471 | 1.8E-01 | 6  | 15.8 |
| Q00610 | Clathrin heavy chain 1                                                                                          | 0.70 | 0.051 | 6.1E-07 | 27 | 16.2 |
| P62805 | Histone H4                                                                                                      | 0.69 | 0.048 | 9.5E-07 | 7  | 52.4 |
| P35606 | Coatamer subunit beta'                                                                                          | 0.69 | NA    | NA      | 2  | 3.5  |
| Q9UHQ9 | NADH-cytochrome b5 reductase 1                                                                                  | 0.69 | 0.096 | 4.9E-03 | 5  | 18.7 |
| P04217 | Alpha-1B-glycoprotein                                                                                           | 0.69 | 0.520 | 3.9E-01 | 3  | 6.7  |
| Q6DD88 | Atlastin-3                                                                                                      | 0.69 | NA    | NA      | 2  | 4.3  |
| P35573 | Glycogen debranching enzyme                                                                                     | 0.69 | NA    | NA      | 2  | 2.1  |
| P09382 | Galectin-1                                                                                                      | 0.68 | 0.062 | 1.3E-04 | 6  | 46.7 |
| P05787 | Keratin, type II cytoskeletal 8                                                                                 | 0.68 | 0.054 | 6.0E-03 | 3  | 5.4  |
| P61163 | Alpha-centractin                                                                                                | 0.68 | NA    | NA      | 2  | 4.5  |
| Q14764 | Major vault protein                                                                                             | 0.68 | 0.100 | 5.4E-03 | 7  | 8.7  |
| P55084 | Trifunctional enzyme subunit beta, mitochondrial                                                                | 0.68 | 0.061 | 6.9E-05 | 10 | 20.5 |
| P04196 | Histidine-rich glycoprotein                                                                                     | 0.67 | 0.160 | 3.7E-02 | 4  | 7.4  |
| Q07157 | Tight junction protein ZO-1                                                                                     | 0.67 | NA    | NA      | 2  | 1.3  |
| P35221 | Catenin alpha-1                                                                                                 | 0.67 | 0.261 | 2.5E-01 | 3  | 3.4  |
| O14950 | Myosin regulatory light chain 12B                                                                               | 0.65 | NA    | NA      | 2  | 12.2 |
| Q16695 | Histone H3.1t                                                                                                   | 0.64 | 0.072 | 2.2E-04 | 3  | 14.7 |
| P16402 | Histone H1.3                                                                                                    | 0.64 | 0.155 | 9.3E-03 | 6  | 15.4 |
| P57105 | Synaptojanin-2-binding protein                                                                                  | 0.64 | NA    | NA      | 2  | 16.6 |
| P61026 | Ras-related protein Rab-10                                                                                      | 0.64 | 0.127 | 3.1E-01 | 3  | 15.0 |
| P60709 | Actin, cytoplasmic 1                                                                                            | 0.64 | 0.079 | 7.3E-05 | 5  | 16.8 |
| Q9UJ7  | GTP-AMP phosphotransferase AK3, mitochondrial                                                                   | 0.64 | NA    | NA      | 2  | 11.0 |
| Q9Y305 | Acyl-coenzyme A thioesterase 9, mitochondrial                                                                   | 0.64 | NA    | NA      | 2  | 5.5  |
| P01860 | Ig gamma-3 chain C region                                                                                       | 0.64 | 0.062 | 1.0E-03 | 3  | 6.4  |
| P33176 | Kinesin-1 heavy chain                                                                                           | 0.63 | NA    | NA      | 2  | 2.8  |
| Q9UBS4 | DnaJ homolog subfamily B member 11                                                                              | 0.63 | NA    | NA      | 2  | 6.4  |
| P08133 | Annexin A6                                                                                                      | 0.63 | 0.048 | 1.4E-10 | 25 | 40.6 |
| O14745 | Na(+)/H(+) exchange regulatory cofactor NHE-RF1                                                                 | 0.63 | NA    | NA      | 2  | 5.6  |
| Q969X5 | Endoplasmic reticulum-Golgi intermediate compartment protein 1                                                  | 0.62 | 0.152 | 6.2E-02 | 3  | 11.0 |
| P00367 | Glutamate dehydrogenase 1, mitochondrial                                                                        | 0.62 | 0.059 | 1.6E-04 | 11 | 22.8 |
| P61626 | Lysozyme C                                                                                                      | 0.62 | NA    | NA      | 2  | 12.8 |
| P43121 | Cell surface glycoprotein MUC18                                                                                 | 0.62 | 0.302 | 1.6E-01 | 4  | 7.4  |
| P53992 | Protein transport protein Sec24C                                                                                | 0.62 | NA    | NA      | 2  | 2.6  |
| P28289 | Tropomodulin-1                                                                                                  | 0.61 | NA    | NA      | 2  | 5.3  |
| Q9H4M9 | EH domain-containing protein 1                                                                                  | 0.61 | 0.090 | 3.8E-02 | 5  | 7.5  |
| O43707 | Alpha-actinin-4                                                                                                 | 0.60 | 0.050 | 2.5E-08 | 16 | 21.0 |
| P09543 | 2',3'-cyclic-nucleotide 3'-phosphodiesterase                                                                    | 0.60 | 0.107 | 7.2E-03 | 4  | 9.5  |
| O15173 | Membrane-associated progesterone receptor component 2                                                           | 0.60 | NA    | NA      | 2  | 9.9  |
| P35222 | Catenin beta-1                                                                                                  | 0.60 | 0.067 | 1.1E-02 | 4  | 5.8  |
| Q9BS26 | Endoplasmic reticulum resident protein 44                                                                       | 0.59 | 0.032 | 1.1E-03 | 4  | 8.4  |
| Q9NZ08 | Endoplasmic reticulum aminopeptidase 1                                                                          | 0.59 | NA    | NA      | 2  | 2.2  |
| P55072 | Transitional endoplasmic reticulum ATPase                                                                       | 0.59 | 0.043 | 1.1E-10 | 11 | 14.6 |
| P06899 | Histone H2B type 1-J                                                                                            | 0.59 | NA    | NA      | 2  | 7.9  |
| Q15435 | Protein phosphatase 1 regulatory subunit 7                                                                      | 0.59 | NA    | NA      | 2  | 5.6  |
| P54709 | Sodium/potassium-transporting ATPase subunit beta-3                                                             | 0.59 | 0.170 | 2.2E-01 | 5  | 22.6 |
| P07099 | Epoxide hydrolase 1                                                                                             | 0.58 | 0.080 | 1.2E-04 | 9  | 14.5 |
| P53621 | Coatamer subunit alpha                                                                                          | 0.58 | NA    | NA      | 2  | 1.4  |
| P50995 | Annexin A11                                                                                                     | 0.57 | 0.064 | 7.6E-04 | 4  | 7.7  |
| Q14344 | Guanine nucleotide-binding protein subunit alpha-13                                                             | 0.57 | 0.349 | 1.1E-01 | 5  | 14.3 |
| P47756 | F-actin-capping protein subunit beta                                                                            | 0.57 | 0.169 | 1.2E-01 | 4  | 16.2 |
| P68371 | Tubulin beta-4B chain                                                                                           | 0.57 | 0.109 | 5.6E-03 | 3  | 10.6 |
| Q9Y639 | Neuroplastin                                                                                                    | 0.57 | 0.178 | 5.5E-02 | 3  | 9.3  |
| Q15436 | Protein transport protein Sec23A                                                                                | 0.56 | 0.342 | 3.2E-01 | 3  | 5.6  |
| Q6NUK1 | Calcium-binding mitochondrial carrier protein ScaMC-1                                                           | 0.56 | NA    | NA      | 2  | 3.4  |
| Q8WUM4 | Programmed cell death 6-interacting protein                                                                     | 0.56 | 0.017 | 3.8E-04 | 3  | 2.9  |
| P05109 | Protein S100-A8                                                                                                 | 0.55 | NA    | NA      | 2  | 19.4 |
| P17655 | Calpain-2 catalytic subunit                                                                                     | 0.55 | 0.039 | 1.2E-02 | 3  | 4.3  |
| Q9POV9 | Septin-10                                                                                                       | 0.55 | NA    | NA      | 2  | 3.7  |
| P20073 | Annexin A7                                                                                                      | 0.55 | NA    | NA      | 2  | 4.1  |
| P11166 | Solute carrier family 2, facilitated glucose transporter member 1                                               | 0.55 | 0.023 | 2.2E-07 | 3  | 5.5  |
| Q6UVK1 | Chondroitin sulfate proteoglycan 4                                                                              | 0.54 | 0.382 | 5.0E-01 | 3  | 2.3  |
| Q9NQC3 | Reticulon-4                                                                                                     | 0.54 | NA    | NA      | 2  | 2.3  |
| Q15019 | Septin-2                                                                                                        | 0.54 | 0.060 | 7.1E-03 | 4  | 13.9 |
| Q16181 | Septin-7                                                                                                        | 0.54 | 0.144 | 7.4E-03 | 8  | 23.1 |
| P11413 | Glucose-6-phosphate 1-dehydrogenase                                                                             | 0.54 | NA    | NA      | 2  | 3.7  |
| P01023 | Alpha-2-macroglobulin                                                                                           | 0.53 | 0.135 | 1.0E-01 | 6  | 5.2  |
| P02649 | Apolipoprotein E                                                                                                | 0.53 | 0.076 | 1.2E-06 | 14 | 45.4 |
| Q9UKG1 | DCC-interacting protein 13-alpha                                                                                | 0.52 | NA    | NA      | 2  | 4.7  |
| O95782 | AP-2 complex subunit alpha-1                                                                                    | 0.52 | 0.234 | 1.3E-01 | 3  | 2.9  |
| Q02218 | 2-oxoglutarate dehydrogenase, mitochondrial                                                                     | 0.52 | 0.053 | 5.6E-06 | 7  | 9.1  |
| P16615 | Sarcolemmal/endoplasmic reticulum calcium ATPase 2                                                              | 0.52 | 0.061 | 2.3E-05 | 8  | 8.3  |
| P10515 | Dihydropolyllysine-residue acetyltransferase component of pyruvate dehydrogenase complex, mitochondrial         | 0.52 | NA    | NA      | 2  | 2.6  |
| P01903 | HLA class II histocompatibility antigen, DR alpha chain                                                         | 0.52 | NA    | NA      | 2  | 9.8  |
| Q9Y4G6 | Talin-2                                                                                                         | 0.52 | NA    | NA      | 2  | 1.3  |
| P24752 | Acetyl-CoA acetyltransferase, mitochondrial                                                                     | 0.52 | 0.204 | 8.6E-02 | 5  | 13.1 |
| Q9Y4L1 | Hypoxia up-regulated protein 1                                                                                  | 0.51 | NA    | NA      | 2  | 2.4  |
| P12814 | Alpha-actinin-1                                                                                                 | 0.51 | 0.046 | 1.4E-07 | 14 | 18.9 |
| O43175 | D-3-phosphoglycerate dehydrogenase                                                                              | 0.50 | NA    | NA      | 2  | 5.6  |
| Q14847 | LIM and SH3 domain protein 1                                                                                    | 0.50 | 0.287 | 2.8E-01 | 3  | 12.6 |
| Q01813 | ATP-dependent 6-phosphofructokinase, platelet type                                                              | 0.50 | NA    | NA      | 2  | 3.7  |
| Q14203 | Dynactin subunit 1                                                                                              | 0.50 | 0.046 | 1.6E-02 | 3  | 3.3  |
| Q9Y369 | Filamin-B                                                                                                       | 0.49 | 0.085 | 9.1E-06 | 11 | 6.3  |
| Q9BTV4 | Transmembrane protein 43                                                                                        | 0.49 | NA    | NA      | 2  | 6.3  |
| P60660 | Myosin light polypeptide 6                                                                                      | 0.49 | 0.050 | 1.5E-13 | 6  | 47.7 |
| P09497 | Clathrin light chain B                                                                                          | 0.49 | NA    | NA      | 2  | 7.9  |
| P54920 | Alpha-soluble NSF attachment protein                                                                            | 0.48 | 0.408 | 3.2E-01 | 3  | 11.2 |
| P04179 | Superoxide dismutase [Mn], mitochondrial                                                                        | 0.48 | 0.109 | 7.5E-03 | 5  | 23.0 |
| Q6PIJ2 | Neutral cholesterol ester hydrolase 1                                                                           | 0.48 | NA    | NA      | 2  | 5.4  |
| P32119 | Peroxioredoxin-2                                                                                                | 0.48 | 0.077 | 3.6E-04 | 4  | 18.2 |
| P18206 | Vinculin                                                                                                        | 0.47 | 0.074 | 8.8E-06 | 15 | 15.9 |

Table S15-Sample UM15

|        |                                                                      |      |       |         |    |      |
|--------|----------------------------------------------------------------------|------|-------|---------|----|------|
| Q9NVA2 | Septin-11                                                            | 0.47 | 0.109 | 4.9E-02 | 4  | 10.3 |
| Q15149 | Plectin                                                              | 0.46 | 0.033 | 0.0E+00 | 52 | 11.5 |
| P06727 | Apolipoprotein A-IV                                                  | 0.46 | 0.079 | 2.4E-04 | 8  | 20.7 |
| P01024 | Complement C3                                                        | 0.46 | 0.199 | 1.5E-03 | 21 | 14.7 |
| P60033 | CD81 antigen                                                         | 0.45 | NA    | NA      | 2  | 11.9 |
| Q9UPT5 | Exocyst complex component 7                                          | 0.45 | NA    | NA      | 2  | 3.0  |
| Q15836 | Vesicle-associated membrane protein 3                                | 0.45 | NA    | NA      | 2  | 24.0 |
| Q12797 | Aspartyl/asparaginyl beta-hydroxylase                                | 0.45 | 0.173 | 8.8E-03 | 5  | 4.7  |
| Q13409 | Cytoplasmic dynein 1 intermediate chain 2                            | 0.44 | NA    | NA      | 2  | 3.9  |
| Q96CW1 | AP-2 complex subunit mu                                              | 0.44 | 0.144 | 1.8E-02 | 3  | 6.4  |
| Q14204 | Cytoplasmic dynein 1 heavy chain 1                                   | 0.44 | 0.032 | 3.5E-14 | 20 | 4.6  |
| Q9Y6N5 | Sulfide:quinone oxidoreductase, mitochondrial                        | 0.44 | 0.252 | 3.4E-02 | 5  | 12.7 |
| Q9BZF9 | Uveal autoantigen with coiled-coil domains and ankyrin repeats       | 0.44 | 0.206 | 3.7E-01 | 3  | 2.8  |
| P04899 | Guanine nucleotide-binding protein G(i) subunit alpha-2              | 0.43 | NA    | NA      | 2  | 6.8  |
| P35579 | Myosin-9                                                             | 0.43 | 0.031 | 0.0E+00 | 59 | 29.6 |
| Q9Y240 | C-type lectin domain family 11 member A                              | 0.43 | NA    | NA      | 2  | 7.7  |
| A0FGR8 | Extended synaptotagmin-2                                             | 0.42 | NA    | NA      | 2  | 3.0  |
| P0COL5 | Complement C4-B                                                      | 0.42 | 0.250 | 7.5E-02 | 3  | 1.0  |
| P49748 | Very long-chain specific acyl-CoA dehydrogenase, mitochondrial       | 0.42 | 0.168 | 1.3E-02 | 4  | 6.7  |
| Q14254 | Flotillin-2                                                          | 0.42 | 0.101 | 4.6E-03 | 3  | 7.5  |
| Q96FJ2 | Dynein light chain 2, cytoplasmic                                    | 0.42 | NA    | NA      | 2  | 20.2 |
| Q9UM54 | Unconventional myosin-VI                                             | 0.41 | NA    | NA      | 2  | 1.5  |
| O43865 | Putative adenosylhomocysteinase 2                                    | 0.41 | NA    | NA      | 2  | 3.6  |
| P26447 | Protein S100-A4                                                      | 0.41 | 0.164 | 4.1E-03 | 3  | 27.7 |
| Q13425 | Beta-2-syntrophin                                                    | 0.41 | NA    | NA      | 2  | 3.1  |
| Q9BZQ8 | Protein Niban                                                        | 0.41 | NA    | NA      | 2  | 2.4  |
| O94919 | Endonuclease domain-containing 1 protein                             | 0.40 | NA    | NA      | 2  | 5.8  |
| P05362 | Intercellular adhesion molecule 1                                    | 0.40 | 0.179 | 2.2E-01 | 3  | 7.9  |
| Q13557 | Calcium/calmodulin-dependent protein kinase type II subunit delta    | 0.39 | NA    | NA      | 2  | 4.2  |
| P01876 | Ig alpha-1 chain C region                                            | 0.39 | NA    | NA      | 2  | 4.5  |
| P59768 | Guanine nucleotide-binding protein G(I)/G(S)/G(O) subunit gamma-2    | 0.38 | NA    | NA      | 2  | 42.3 |
| Q03591 | Complement factor H-related protein 1                                | 0.38 | NA    | NA      | 2  | 9.4  |
| P12235 | ADP/ATP translocase 1                                                | 0.36 | NA    | NA      | 2  | 7.4  |
| P00352 | Retinal dehydrogenase 1                                              | 0.35 | NA    | NA      | 2  | 4.8  |
| Q63ZY3 | KN motif and ankyrin repeat domain-containing protein 2              | 0.34 | NA    | NA      | 2  | 4.2  |
| P02654 | Apolipoprotein C-I                                                   | 0.33 | NA    | NA      | 2  | 24.1 |
| Q96AC1 | Fermitin family homolog 2                                            | 0.33 | NA    | NA      | 2  | 3.1  |
| Q6NY19 | KN motif and ankyrin repeat domain-containing protein 3              | 0.31 | NA    | NA      | 2  | 3.3  |
| P07305 | Histone H1.0                                                         | 0.30 | NA    | NA      | 2  | 9.3  |
| P46939 | Utrophin                                                             | 0.30 | 0.179 | 1.3E-01 | 3  | 0.9  |
| P62873 | Guanine nucleotide-binding protein G(I)/G(S)/G(T) subunit beta-1     | 0.29 | 0.302 | 3.8E-01 | 3  | 12.9 |
| P13671 | Complement component C6                                              | 0.29 | NA    | NA      | 2  | 2.7  |
| O94832 | Unconventional myosin-Id                                             | 0.29 | NA    | NA      | 2  | 2.4  |
| P04839 | Cytochrome b-245 heavy chain                                         | 0.28 | NA    | NA      | 2  | 3.0  |
| P13987 | CD59 glycoprotein                                                    | 0.28 | NA    | NA      | 2  | 15.6 |
| P10745 | Retinol-binding protein 3                                            | 0.27 | 0.696 | 1.6E-01 | 3  | 2.3  |
| P06756 | Integrin alpha-V                                                     | 0.27 | NA    | NA      | 2  | 1.4  |
| P05164 | Myeloperoxidase                                                      | 0.27 | 0.209 | 5.6E-02 | 3  | 4.7  |
| Q92556 | Engulfment and cell motility protein 1                               | 0.24 | NA    | NA      | 2  | 3.2  |
| O43301 | Heat shock 70 kDa protein 12A                                        | 0.23 | 0.272 | 1.1E-01 | 3  | 5.2  |
| Q03135 | Caveolin-1                                                           | 0.22 | NA    | NA      | 2  | 13.5 |
| Q12805 | EGF-containing fibulin-like extracellular matrix protein 1           | 0.22 | NA    | NA      | 2  | 3.9  |
| P07942 | Laminin subunit beta-1                                               | 0.22 | 0.173 | 9.8E-02 | 3  | 2.1  |
| Q96CX2 | BTB/POZ domain-containing protein KCTD12                             | 0.22 | 0.183 | 1.7E-01 | 3  | 9.8  |
| Q14767 | Latent-transforming growth factor beta-binding protein 2             | 0.21 | NA    | NA      | 2  | 1.7  |
| Q9HBL0 | Tensin-1                                                             | 0.21 | 0.565 | 7.1E-01 | 3  | 3.1  |
| P23229 | Integrin alpha-6                                                     | 0.20 | NA    | NA      | 2  | 2.3  |
| Q13642 | Four and a half LIM domains protein 1                                | 0.18 | NA    | NA      | 2  | 5.6  |
| Q9BS40 | Latexin                                                              | 0.17 | NA    | NA      | 2  | 12.2 |
| P05186 | Alkaline phosphatase, tissue-nonspecific isozyme                     | 0.15 | NA    | NA      | 2  | 3.8  |
| O94875 | Sorbin and SH3 domain-containing protein 2                           | 0.14 | NA    | NA      | 2  | 3.7  |
| Q14699 | Raftlin                                                              | 0.14 | NA    | NA      | 2  | 3.8  |
| P22105 | Tenascin-X                                                           | 0.13 | NA    | NA      | 2  | 0.4  |
| P35243 | Recoverin                                                            | 0.13 | NA    | NA      | 2  | 13.5 |
| Q969G5 | Protein kinase C delta-binding protein                               | 0.11 | NA    | NA      | 2  | 7.7  |
| Q9BXN1 | Asporin                                                              | 0.11 | NA    | NA      | 2  | 2.9  |
| P24844 | Myosin regulatory light polypeptide 9                                | 0.10 | NA    | NA      | 2  | 12.2 |
| P02686 | Myelin basic protein                                                 | 0.09 | NA    | NA      | 2  | 7.2  |
| P07196 | Neurofilament light polypeptide                                      | 0.07 | NA    | NA      | 2  | 3.5  |
| P08123 | Collagen alpha-2(I) chain                                            | 0.05 | NA    | NA      | 2  | 2.4  |
| P23946 | Chymase                                                              | 0.04 | 0.371 | 5.1E-02 | 5  | 25.5 |
| P02751 | Fibronectin                                                          | 0.41 | 0.049 | 1.7E-10 | 15 | 7.7  |
| Q03252 | Lamin-B2                                                             | 0.41 | 0.051 | 4.4E-12 | 17 | 27.0 |
| P00387 | NADH-cytochrome b5 reductase 3                                       | 0.40 | 0.090 | 5.1E-05 | 6  | 26.6 |
| P51648 | Fatty aldehyde dehydrogenase                                         | 0.39 | 0.028 | 3.5E-02 | 3  | 6.2  |
| P06396 | Gelsolin                                                             | 0.39 | 0.064 | 1.2E-09 | 13 | 18.7 |
| Q9BSJ8 | Extended synaptotagmin-1                                             | 0.39 | 0.182 | 1.4E-02 | 4  | 4.7  |
| Q90666 | Neuroblast differentiation-associated protein AHNAK                  | 0.38 | 0.032 | 0.0E+00 | 63 | 9.4  |
| Q07954 | Prolow-density lipoprotein receptor-related protein 1                | 0.37 | 0.063 | 6.0E-08 | 11 | 3.2  |
| O94905 | Erlin-2                                                              | 0.37 | 0.120 | 1.4E-04 | 5  | 12.4 |
| P07358 | Complement component C8 beta chain                                   | 0.37 | 0.231 | 2.9E-02 | 4  | 7.8  |
| P05023 | Sodium/potassium-transporting ATPase subunit alpha-1                 | 0.36 | 0.061 | 8.5E-10 | 10 | 10.9 |
| P02749 | Beta-2-glycoprotein 1                                                | 0.36 | 0.202 | 1.9E-03 | 3  | 9.6  |
| O00159 | Unconventional myosin-Ic                                             | 0.35 | 0.204 | 7.7E-03 | 7  | 7.0  |
| Q99584 | Protein S100-A13                                                     | 0.34 | 0.126 | 5.1E-04 | 3  | 33.7 |
| P01011 | Alpha-1-antichymotrypsin                                             | 0.34 | 0.091 | 6.4E-08 | 8  | 17.7 |
| P04216 | Thy-1 membrane glycoprotein                                          | 0.34 | 0.066 | 9.1E-05 | 3  | 16.1 |
| P04004 | Vitronectin                                                          | 0.33 | 0.090 | 4.6E-08 | 10 | 20.9 |
| P02675 | Fibrinogen beta chain                                                | 0.33 | 0.074 | 7.8E-11 | 9  | 23.6 |
| P05556 | Integrin beta-1                                                      | 0.33 | 0.080 | 1.9E-04 | 6  | 8.3  |
| P12111 | Collagen alpha-3(VI) chain                                           | 0.33 | 0.049 | 0.0E+00 | 39 | 13.3 |
| P07355 | Annexin A2                                                           | 0.33 | 0.038 | 0.0E+00 | 22 | 54.0 |
| P00167 | Cytochrome b5                                                        | 0.32 | 0.078 | 2.9E-03 | 4  | 42.5 |
| P02679 | Fibrinogen gamma chain                                               | 0.31 | 0.131 | 1.0E-04 | 10 | 22.7 |
| P12110 | Collagen alpha-2(VI) chain                                           | 0.31 | 0.168 | 8.9E-05 | 7  | 7.5  |
| Q9NZM1 | Myoferlin                                                            | 0.30 | 0.210 | 1.6E-03 | 6  | 3.5  |
| P12109 | Collagen alpha-1(VI) chain                                           | 0.30 | 0.064 | 1.1E-07 | 9  | 9.5  |
| P43320 | Beta-crystallin B2                                                   | 0.28 | 0.271 | 3.8E-02 | 3  | 15.6 |
| P00450 | Ceruloplasmin                                                        | 0.28 | 0.063 | 6.1E-08 | 10 | 11.4 |
| P09493 | Tropomyosin alpha-1 chain                                            | 0.27 | 0.125 | 2.3E-05 | 4  | 10.2 |
| P27105 | Erythrocyte band 7 integral membrane protein                         | 0.27 | 0.066 | 6.4E-05 | 4  | 14.2 |
| P00738 | Haptoglobin                                                          | 0.27 | 0.038 | 4.4E-03 | 3  | 6.4  |
| Q9Y490 | Talin-1                                                              | 0.26 | 0.076 | 4.6E-10 | 20 | 10.2 |
| P21333 | Filamin-A                                                            | 0.26 | 0.042 | 0.0E+00 | 43 | 21.8 |
| Q01082 | Spectrin beta chain, non-erythrocytic 1                              | 0.26 | 0.034 | 0.0E+00 | 44 | 22.4 |
| P02671 | Fibrinogen alpha chain                                               | 0.26 | 0.080 | 1.3E-08 | 11 | 14.9 |
| Q9Y6C2 | EMILIN-1                                                             | 0.26 | 0.150 | 2.7E-04 | 7  | 9.2  |
| Q13B13 | Spectrin alpha chain, non-erythrocytic 1                             | 0.26 | 0.031 | 0.0E+00 | 69 | 32.1 |
| P08294 | Extracellular superoxide dismutase [Cu-Zn]                           | 0.24 | 0.125 | 1.1E-03 | 3  | 15.4 |
| Q16363 | Laminin subunit alpha-4                                              | 0.24 | 0.208 | 1.7E-03 | 6  | 3.6  |
| P68032 | Actin, alpha cardiac muscle 1                                        | 0.23 | 0.191 | 2.1E-06 | 6  | 21.0 |
| P02549 | Spectrin alpha chain, erythrocytic 1                                 | 0.23 | 0.189 | 1.3E-04 | 10 | 4.9  |
| P98160 | Basement membrane-specific heparan sulfate proteoglycan core protein | 0.22 | 0.059 | 0.0E+00 | 33 | 9.3  |
| P08572 | Collagen alpha-2(IV) chain                                           | 0.22 | 0.170 | 3.9E-06 | 6  | 3.9  |
| P10909 | Clusterin                                                            | 0.22 | 0.048 | 0.0E+00 | 17 | 34.5 |



Table S15-Sample UM15

|        |                                                  |      |       |         |    |      |
|--------|--------------------------------------------------|------|-------|---------|----|------|
| Q16555 | Dihydropyrimidinase-related protein 2            | 0.21 | 0.112 | 9.5E-07 | 7  | 15.9 |
| P02511 | Alpha-crystallin B chain                         | 0.20 | 0.220 | 5.2E-04 | 3  | 17.1 |
| P55268 | Laminin subunit beta-2                           | 0.20 | 0.090 | 5.1E-10 | 14 | 8.7  |
| P50895 | Basal cell adhesion molecule                     | 0.20 | 0.250 | 8.3E-03 | 4  | 9.2  |
| P09936 | Ubiquitin carboxyl-terminal hydrolase isozyme L1 | 0.19 | 0.141 | 1.0E-04 | 4  | 21.5 |
| P04083 | Annexin A1                                       | 0.17 | 0.058 | 1.6E-12 | 14 | 44.5 |
| Q43491 | Band 4.1-like protein 2                          | 0.17 | 0.046 | 3.2E-05 | 7  | 10.0 |
| P39060 | Collagen alpha-1(XVIII) chain                    | 0.17 | 0.085 | 3.5E-10 | 5  | 3.1  |
| P80723 | Brain acid soluble protein 1                     | 0.17 | 0.093 | 1.8E-07 | 6  | 38.3 |
| P11277 | Spectrin beta chain, erythrocytic                | 0.17 | 0.135 | 5.7E-03 | 9  | 5.1  |
| P60903 | Protein S100-A10                                 | 0.17 | 0.071 | 4.1E-11 | 4  | 35.1 |
| P01008 | Antithrombin-III                                 | 0.16 | 0.147 | 7.7E-04 | 4  | 9.9  |
| Q6NZ12 | Polymerase I and transcript release factor       | 0.16 | 0.131 | 5.4E-05 | 6  | 19.2 |
| Q05707 | Collagen alpha-1(XIV) chain                      | 0.16 | 0.147 | 4.1E-07 | 9  | 5.1  |
| Q01995 | Transgelin                                       | 0.16 | 0.160 | 4.1E-03 | 4  | 21.9 |
| P16157 | Ankyrin-1                                        | 0.15 | 0.138 | 3.9E-04 | 3  | 2.1  |
| Q9BXM0 | Penaxin                                          | 0.15 | 0.254 | 4.1E-03 | 4  | 1.4  |
| P46821 | Microtubule-associated protein 1B                | 0.15 | 0.126 | 4.6E-06 | 6  | 3.1  |
| O15230 | Laminin subunit alpha-5                          | 0.14 | 0.114 | 4.2E-10 | 10 | 3.3  |
| Q14112 | Nidogen-2                                        | 0.14 | 0.149 | 2.0E-06 | 9  | 7.7  |
| P01031 | Complement C5                                    | 0.14 | 0.155 | 1.8E-04 | 7  | 4.3  |
| P02462 | Collagen alpha-1(IV) chain                       | 0.13 | 0.161 | 2.7E-03 | 4  | 3.3  |
| P01871 | Ig mu chain C region                             | 0.13 | 0.194 | 1.5E-04 | 6  | 15.9 |
| P14543 | Nidogen-1                                        | 0.12 | 0.147 | 3.6E-06 | 7  | 7.2  |
| P11047 | Laminin subunit gamma-1                          | 0.12 | 0.131 | 5.6E-06 | 11 | 6.3  |
| P07197 | Neurofilament medium polypeptide                 | 0.12 | 0.272 | 1.8E-02 | 4  | 6.8  |
| P02743 | Serum amyloid P-component                        | 0.12 | 0.135 | 1.7E-08 | 6  | 23.3 |
| P02760 | Protein AMBP                                     | 0.12 | 0.175 | 1.3E-03 | 3  | 12.5 |
| P04275 | von Willebrand factor                            | 0.12 | 0.136 | 1.1E-09 | 11 | 4.3  |
| P22352 | Glutathione peroxidase 3                         | 0.12 | 0.092 | 1.6E-07 | 3  | 11.5 |
| P21980 | Protein-glutamine gamma-glutamyltransferase 2    | 0.11 | 0.097 | 2.7E-11 | 13 | 18.5 |
| P02730 | Band 3 anion transport protein                   | 0.11 | 0.131 | 1.5E-07 | 9  | 12.1 |
| Q14195 | Dihydropyrimidinase-related protein 3            | 0.11 | 0.111 | 5.7E-09 | 9  | 21.6 |
| P58166 | Inhibin beta E chain                             | 0.11 | 0.395 | 3.7E-02 | 3  | 10.0 |
| P07585 | Decorin                                          | 0.11 | 0.134 | 2.5E-05 | 7  | 21.7 |
| P02748 | Complement component C9                          | 0.11 | 0.096 | 4.1E-08 | 9  | 14.5 |
| P51888 | Prolargin                                        | 0.11 | 0.063 | 0.0E+00 | 10 | 29.3 |
| P35749 | Myosin-11                                        | 0.11 | 0.111 | 1.2E-12 | 34 | 20.2 |
| P20774 | Mimecan                                          | 0.10 | 0.115 | 6.0E-11 | 8  | 24.8 |
| P36269 | Gamma-glutamyltransferase 5                      | 0.10 | 0.203 | 4.0E-05 | 6  | 12.3 |
| P35625 | Metalloproteinase inhibitor 3                    | 0.10 | 0.163 | 1.3E-06 | 4  | 19.4 |
| P35555 | Fibrillin-1                                      | 0.10 | 0.057 | 0.0E+00 | 42 | 16.5 |
| Q02952 | A-kinase anchor protein 12                       | 0.10 | 0.161 | 8.4E-05 | 9  | 5.2  |
| P22748 | Carbonic anhydrase 4                             | 0.10 | 0.192 | 9.7E-07 | 8  | 23.1 |
| P15088 | Mast cell carboxypeptidase A                     | 0.08 | 0.156 | 2.2E-06 | 6  | 12.5 |
| P21810 | Biglycan                                         | 0.08 | 0.100 | 1.8E-13 | 8  | 24.5 |
| P21926 | CD9 antigen                                      | 0.08 | 0.133 | 1.7E-03 | 3  | 9.6  |
| P41219 | Peripherin                                       | 0.08 | 0.123 | 2.5E-08 | 13 | 26.6 |
| P39059 | Collagen alpha-1(XV) chain                       | 0.07 | 0.283 | 3.0E-03 | 4  | 2.9  |
| P51884 | Lumican                                          | 0.07 | 0.063 | 0.0E+00 | 10 | 29.3 |
| Q15661 | Tryptase alpha/beta-1                            | 0.06 | 0.139 | 9.1E-09 | 5  | 21.8 |
| P25189 | Myelin protein P0                                | 0.04 | 0.131 | 1.2E-10 | 7  | 27.4 |

Brown denotes change  $\geq 2$  standard deviations (SD) from the mean, yellow denotes change  $\geq 1$  SD and green highlights p values  $\leq 0.05$ . NA, not applicable, n<3 unique peptides.
