# Supplementary material for: iTRAQ Quantitative Proteomic Comparison of Metastatic and Non-Metastatic Uveal Melanoma Tumors
Source: PubMed Central journal article supplement (PMC4549237; doi:10.1371/journal.pone.0135543), 2015-08-25
Supplement: pone.0135543.s016.pdf [file pone.0135543.s016.pdf]

Table S16-Average Metastatic Tumors

| Supplementary Table S16                                                                             |                                                                          |                                 |                     |       |         |  |
|-----------------------------------------------------------------------------------------------------|--------------------------------------------------------------------------|---------------------------------|---------------------|-------|---------|--|
| Average Relative Protein Abundance: Metastatic Tumors (Samples UM19, UM21, UM24, UM25, UM30)        |                                                                          |                                 |                     |       |         |  |
| [All Proteins Quantified > 100, Log2(Ratio) Protein Ratio < 0.11, Log2(Ratio) Protein Ratio > 0.11] |                                                                          |                                 |                     |       |         |  |
| UniProt Accession                                                                                   | Protein                                                                  | Sample Frequency<br>n = # total | Ratio<br>UM/Control | SEM   | p value |  |
| P62937                                                                                              | Peptidyl-prolyl cis-trans isomerase A                                    | 5                               | 8.11                | 0.042 | 1.3E-05 |  |
| P09413                                                                                              | Fatty acid-binding protein, heart                                        | 3                               | 4.91                | 0.193 | 1.4E-02 |  |
| P11706                                                                                              | High mobility group protein HMG-1/HMG-Y                                  | 4                               | 4.70                | 0.369 | 2.1E-02 |  |
| P23381                                                                                              | Tryptophan-tRNA ligase, cytoplasmic                                      | 5                               | 4.42                | 0.151 | 6.0E-04 |  |
| P07108                                                                                              | Acyl-CoA-binding protein                                                 | 3                               | 4.23                | 0.041 | 8.2E-04 |  |
| F78417                                                                                              | Citrate synthase 2                                                       | 5                               | 4.16                | 0.060 | 1.6E-05 |  |
| P06454                                                                                              | Prothymosin alpha                                                        | 4                               | 4.15                | 0.000 | 1.6E-04 |  |
| P02768                                                                                              | Serum albumin                                                            | 4                               | 4.05                | 0.225 | 4.6E-03 |  |
| 075368                                                                                              | SH3 domain-binding glutamic acid-rich-like protein                       | 4                               | 4.04                | 0.144 | 2.3E-03 |  |
| I41656                                                                                              | Glyceraldehyde-3-phosphate dehydrogenase, testis-specific                | 4                               | 3.99                | 0.240 | 1.0E-02 |  |
| P19109                                                                                              | Bifunctional purine biosynthetic protein PURH                            | 4                               | 3.98                | 0.241 | 1.1E-02 |  |
| P30043                                                                                              | Flavin reductase (NADPH)                                                 | 4                               | 3.78                | 0.080 | 4.8E-04 |  |
| P52566                                                                                              | Rho GDP-dissociation inhibitor 2                                         | 4                               | 3.74                | 0.021 | 2.0E-02 |  |
| P09695                                                                                              | Beta-hexosaminidase subunit alpha                                        | 4                               | 3.71                | 0.143 | 0.7E-03 |  |
| 081008                                                                                              | Phospholipase D3                                                         | 4                               | 3.64                | 0.122 | 1.8E-03 |  |
| P62241                                                                                              | Eukaryotic translation initiation factor 5A-1                            | 5                               | 3.58                | 0.122 | 4.6E-04 |  |
| P00559                                                                                              | Phosphoglycerate kinase 1                                                | 5                               | 3.46                | 0.043 | 8.5E-06 |  |
| 000796                                                                                              | Sorbitol dehydrogenase                                                   | 5                               | 3.33                | 0.137 | 9.4E-04 |  |
| P31146                                                                                              | Coronin-1A                                                               | 4                               | 3.31                | 0.222 | 1.6E-02 |  |
| Q9UBRC                                                                                              | Cathepsin Z                                                              | 3                               | 3.28                | 0.067 | 3.1E-03 |  |
| P40925                                                                                              | Malate dehydrogenase, cytoplasmic                                        | 4                               | 3.20                | 0.118 | 2.2E-03 |  |
| Q9Y252                                                                                              | Luminal cristallin homolog                                               | 4                               | 3.19                | 0.226 | 1.4E-02 |  |
| P23528                                                                                              | Cofilin-1                                                                | 5                               | 3.11                | 0.051 | 2.4E-05 |  |
| P06733                                                                                              | Alpha-enolase                                                            | 5                               | 3.09                | 0.135 | 1.1E-03 |  |
| P07737                                                                                              | Protein-1                                                                | 5                               | 3.07                | 0.162 | 0.3E-03 |  |
| P12955                                                                                              | Xaa-Pro dipeptidase                                                      | 4                               | 3.06                | 0.152 | 5.2E-03 |  |
| P06306                                                                                              | Phosphatylethanolamine-binding protein 1                                 | 5                               | 3.06                | 0.288 | 1.9E-02 |  |
| P01714                                                                                              | Triosephosphate isomerase                                                | 5                               | 3.05                | 0.108 | 8.0E-04 |  |
| P61088                                                                                              | Ubiquitin-conjugating enzyme E2 N                                        | 3                               | 3.02                | 0.067 | 3.7E-03 |  |
| P07698                                                                                              | Beta-hexosaminidase subunit beta                                         | 4                               | 3.02                | 0.147 | 4.6E-03 |  |
| Q14665                                                                                              | Fascin                                                                   | 4                               | 3.00                | 0.080 | 8.3E-04 |  |
| 075347                                                                                              | Tubulin-specific chaperone A                                             | 3                               | 2.95                | 0.149 | 1.9E-02 |  |
| Q96286                                                                                              | mTOSpp1 diphosphatase                                                    | 4                               | 2.93                | 0.143 | 3.9E-03 |  |
| P02787                                                                                              | Serotransferrin                                                          | 5                               | 2.91                | 0.207 | 6.6E-03 |  |
| P40121                                                                                              | Macrophage-capping protein                                               | 3                               | 2.88                | 0.110 | 1.1E-02 |  |
| P18401                                                                                              | Histone H1.5                                                             | 5                               | 2.88                | 0.250 | 3.9E-02 |  |
| Q99497                                                                                              | Protein DJ-1                                                             | 5                               | 2.88                | 0.190 | 5.1E-03 |  |
| I15400                                                                                              | Syntaxin-7                                                               | 4                               | 2.88                | 0.215 | 1.6E-02 |  |
| Q10105                                                                                              | Protein SET                                                              | 4                               | 2.79                | 0.144 | 1.6E-02 |  |
| Q65338                                                                                              | 6-phosphogluconolactonase                                                | 4                               | 2.78                | 0.093 | 1.6E-03 |  |
| P19299                                                                                              | Thioredoxin                                                              | 5                               | 2.78                | 0.251 | 1.5E-02 |  |
| P23239                                                                                              | Adenosinephosphorylase                                                   | 5                               | 2.78                | 0.069 | 1.2E-04 |  |
| P29401                                                                                              | Transketolase                                                            | 5                               | 2.78                | 0.108 | 7.1E-04 |  |
| P52565                                                                                              | Rho GDP-dissociation inhibitor 1                                         | 5                               | 2.76                | 0.124 | 1.2E-03 |  |
| P04405                                                                                              | Glyceraldehyde-3-phosphate dehydrogenase                                 | 5                               | 2.74                | 0.052 | 4.3E-05 |  |
| P57729                                                                                              | Ras-related protein Rab-38                                               | 4                               | 2.73                | 0.138 | 5.4E-03 |  |
| P15531                                                                                              | Nucleoside diphosphate kinase A                                          | 5                               | 2.73                | 0.158 | 3.2E-03 |  |
| P08758                                                                                              | Annexin A5                                                               | 5                               | 2.72                | 0.043 | 2.0E-05 |  |
| P13693                                                                                              | Transcriptionally-controlled tumor protein                               | 3                               | 2.70                | 0.128 | 1.6E-02 |  |
| P19338                                                                                              | Nucleolin                                                                | 5                               | 2.70                | 0.151 | 2.9E-03 |  |
| Q9Y2X3                                                                                              | Nucleolar protein 58                                                     | 5                               | 2.68                | 0.082 | 2.8E-04 |  |
| P22067                                                                                              | mRNA 2'-O-methyltransferase fibrillarin                                  | 5                               | 2.67                | 0.100 | 5.9E-04 |  |
| P00295                                                                                              | Rap GTP dissociation inhibitor beta                                      | 4                               | 2.66                | 0.154 | 7.6E-03 |  |
| Q96RA2                                                                                              | Thioredoxin domain-containing protein 17                                 | 3                               | 2.64                | 0.134 | 1.9E-02 |  |
| P11706                                                                                              | Alcohol dehydrogenase class-3                                            | 5                               | 2.64                | 0.129 | 1.7E-03 |  |
| P13796                                                                                              | Fascin-2                                                                 | 4                               | 2.62                | 0.177 | 1.2E-02 |  |
| P06748                                                                                              | Nucleophosmin                                                            | 5                               | 2.60                | 0.128 | 1.7E-03 |  |
| P16070                                                                                              | CD44 antigen                                                             | 5                               | 2.58                | 0.141 | 2.5E-03 |  |
| P04080                                                                                              | Cystatin B                                                               | 5                               | 2.57                | 0.107 | 9.1E-04 |  |
| P20042                                                                                              | Eukaryotic translation initiation factor 2 subunit 2                     | 4                               | 2.56                | 0.103 | 2.8E-03 |  |
| P07195                                                                                              | L-lactate dehydrogenase B chain                                          | 4                               | 2.55                | 0.223 | 1.4E-02 |  |
| P51858                                                                                              | Hepatitis B virus core protein                                           | 3                               | 2.55                | 0.130 | 1.9E-02 |  |
| Q55166                                                                                              | Programmed cell death protein 4                                          | 3                               | 2.50                | 0.076 | 6.9E-03 |  |
| P07741                                                                                              | Adenosine phosphoribosyltransferase                                      | 4                               | 2.49                | 0.100 | 2.7E-03 |  |
| P85846                                                                                              | Myotrophin                                                               | 3                               | 2.46                | 0.085 | 8.7E-03 |  |
| P18152                                                                                              | Carbonyl reductase [NADPH] 1                                             | 5                               | 2.45                | 0.139 | 2.9E-03 |  |
| Q00760                                                                                              | Lactoyglutathione lyase                                                  | 4                               | 2.45                | 0.091 | 2.6E-03 |  |
| Q22234                                                                                              | Multifunctional protein ADE2                                             | 4                               | 2.44                | 0.073 | 1.2E-03 |  |
| P11900                                                                                              | Cardiolipin OMT activator                                                | 3                               | 2.38                | 0.129 | 2.1E-02 |  |
| P63104                                                                                              | 14-3-3 protein zeta/delta                                                | 5                               | 2.37                | 0.116 | 1.6E-03 |  |
| P06744                                                                                              | Glucose-6-phosphate isomerase                                            | 5                               | 2.37                | 0.187 | 9.9E-03 |  |
| Q40967                                                                                              | Melanocyte protein PMEL                                                  | 3                               | 2.36                | 0.154 | 3.1E-02 |  |
| P33121                                                                                              | Long-chain-fatty-acyl-CoA ligase 1                                       | 4                               | 2.35                | 0.145 | 9.7E-03 |  |
| Q9HG55                                                                                              | Probable serine carboxypeptidase CPVL                                    | 3                               | 2.35                | 0.138 | 2.9E-02 |  |
| P13948                                                                                              | Stress-induced phosphoprotein 1                                          | 5                               | 2.33                | 0.080 | 4.6E-04 |  |
| P07858                                                                                              | Cathepsin B                                                              | 5                               | 2.31                | 0.204 | 1.5E-02 |  |
| P66842                                                                                              | Eukaryotic initiation factor 4A-1                                        | 5                               | 2.30                | 0.078 | 4.3E-04 |  |
| Q14816                                                                                              | Proteasome subunit alpha type-7                                          | 3                               | 2.30                | 0.151 | 1.2E-02 |  |
| P07900                                                                                              | Heat shock protein HSP 90-alpha                                          | 5                               | 2.29                | 0.058 | 1.4E-04 |  |
| Q13838                                                                                              | Sylcozyme RNAse Hcase 5D/59B                                             | 5                               | 2.27                | 0.114 | 1.9E-03 |  |
| Q13185                                                                                              | Chromobox protein homolog 3                                              | 5                               | 2.26                | 0.179 | 1.0E-02 |  |
| Q13510                                                                                              | Acid ceramidase                                                          | 5                               | 2.25                | 0.220 | 2.1E-02 |  |
| P15121                                                                                              | Aldehyde reductase                                                       | 4                               | 2.23                | 0.098 | 4.0E-03 |  |
| P07339                                                                                              | Cathepsin D                                                              | 5                               | 2.18                | 0.091 | 1.0E-03 |  |
| P14818                                                                                              | Pyruvate kinase PKM                                                      | 5                               | 2.16                | 0.110 | 2.2E-03 |  |
| P14774                                                                                              | Macrophage migration inhibitory factor                                   | 1                               | 8.66                | NA    | NA      |  |
| Q80E05                                                                                              | Apolipoprotein L2                                                        | 1                               | 7.90                | NA    | NA      |  |
| P27169                                                                                              | Serum paraoxonase/arylesterase 1                                         | 1                               | 7.23                | NA    | NA      |  |
| Q8L141                                                                                              | Paraneoplastic antigen Mac3                                              | 1                               | 6.85                | NA    | NA      |  |
| Q9UJ08                                                                                              | Ena/VASP-like protein                                                    | 1                               | 5.93                | NA    | NA      |  |
| P06702                                                                                              | Protein S100-A9                                                          | 1                               | 5.75                | NA    | NA      |  |
| P13686                                                                                              | Tartate-resistant acid phosphatase type 5                                | 1                               | 5.06                | NA    | NA      |  |
| Q55N78                                                                                              | WASH complex subunit FAM21B                                              | 1                               | 4.95                | NA    | NA      |  |
| Q05919                                                                                              | Antigen peptide transporter 2                                            | 1                               | 4.86                | NA    | NA      |  |
| P23435                                                                                              | Interferon-induced guanylate-binding protein 1                           | 1                               | 4.78                | NA    | NA      |  |
| P18463                                                                                              | HLA class I histocompatibility antigen, B-27 alpha chain                 | 1                               | 4.78                | NA    | NA      |  |
| P52769                                                                                              | IMP2-like protein 1                                                      | 1                               | 4.76                | NA    | NA      |  |
| P48663                                                                                              | Granzyme K                                                               | 1                               | 4.36                | NA    | NA      |  |
| P27895                                                                                              | DNA (apurinic or arymidinic site) lyase                                  | 2                               | 4.29                | NA    | NA      |  |
| P08273                                                                                              | High affinity immunoglobulin epsilon receptor subunit gamma              | 1                               | 4.18                | NA    | NA      |  |
| Q00625                                                                                              | Pinin                                                                    | 2                               | 4.14                | NA    | NA      |  |
| P05109                                                                                              | Protein S100-A8                                                          | 1                               | 4.05                | NA    | NA      |  |
| P56655                                                                                              | Neurophil defensin 1                                                     | 1                               | 4.03                | NA    | NA      |  |
| P43652                                                                                              | Alamin                                                                   | 1                               | 4.01                | NA    | NA      |  |
| Q96948                                                                                              | Probable rRNA-processing protein EBP2                                    | 1                               | 3.96                | NA    | NA      |  |
| P09801                                                                                              | Heme oxygenase 1                                                         | 1                               | 3.78                | NA    | NA      |  |
| Q96203                                                                                              | Phosphoglucomutase-2                                                     | 1                               | 3.68                | NA    | NA      |  |
| Q13637                                                                                              | Ras-related protein Rab-32                                               | 1                               | 3.67                | NA    | NA      |  |
| P17213                                                                                              | Bactericidal permeability-increasing protein                             | 1                               | 3.63                | NA    | NA      |  |
| Q9NRV9                                                                                              | Heme-binding protein 1                                                   | 2                               | 3.62                | NA    | NA      |  |
| Q9N1E3                                                                                              | Nuclear ubiquitin casein and cyclin-dependent kinase substrate 1         | 2                               | 3.58                | NA    | NA      |  |
| P24158                                                                                              | Myotubularin                                                             | 1                               | 3.40                | NA    | NA      |  |
| O18189                                                                                              | Ubiquitin-conjugating enzyme E2 variant 2                                | 2                               | 3.39                | NA    | NA      |  |
| Q80170                                                                                              | Serine/threonine-rich splicing factor 4                                  | 1                               | 3.34                | NA    | NA      |  |
| P33085                                                                                              | UMP-CMP kinase                                                           | 2                               | 3.23                | NA    | NA      |  |
| P18586                                                                                              | N-acetylglucosamine-6-sulfatase                                          | 2                               | 3.23                | NA    | NA      |  |
| Q90115                                                                                              | Cationic aminopropylase 1                                                | 2                               | 3.18                | NA    | NA      |  |
| P04439                                                                                              | HLA class I histocompatibility antigen, A-3 alpha chain                  | 1                               | 3.18                | NA    | NA      |  |
| P66534                                                                                              | HLA class I histocompatibility antigen, A-24 alpha chain                 | 1                               | 3.17                | NA    | NA      |  |
| P62310                                                                                              | UB-protein-associated Ctn-like protein L5n3                              | 1                               | 3.17                | NA    | NA      |  |
| Q03518                                                                                              | Antigen peptide transporter 1                                            | 1                               | 3.16                | NA    | NA      |  |
| P41218                                                                                              | Myosid cell nuclear differentiation antigen                              | 1                               | 3.06                | NA    | NA      |  |
| Q8WMM9                                                                                              | Cytoglobin                                                               | 2                               | 3.03                | NA    | NA      |  |
| Q98XK5                                                                                              | Bcl-2-like protein 1D                                                    | 1                               | 2.99                | NA    | NA      |  |
| Q69VJ8                                                                                              | U3 small nuclear RNA-associated protein 14 homolog A                     | 1                               | 2.94                | NA    | NA      |  |
| P18930                                                                                              | Fumarylacetoacetase                                                      | 2                               | 2.93                | NA    | NA      |  |
| O15347                                                                                              | High mobility group protein B3                                           | 1                               | 2.90                | NA    | NA      |  |
| O15533                                                                                              | Tapasin                                                                  | 2                               | 2.89                | NA    | NA      |  |
| P87809                                                                                              | Nuclease-sensitive element-binding protein 1                             | 1                               | 2.85                | NA    | NA      |  |
| P09695                                                                                              | LeuKylifene A-4 hydrolase                                                | 1                               | 2.83                | NA    | NA      |  |
| Q00115                                                                                              | Deoxyribonuclease-2-alpha                                                | 1                               | 2.78                | NA    | NA      |  |
| O13428                                                                                              | Teacup protein                                                           | 2                               | 2.77                | NA    | NA      |  |
| Q9U290                                                                                              | Proliferation-associated protein 2G4                                     | 1                               | 2.72                | NA    | NA      |  |
| P10253                                                                                              | Lysosomal alpha-glucosidase                                              | 1                               | 2.72                | NA    | NA      |  |
| Q9JHL4                                                                                              | Dipeptidyl peptidase 2                                                   | 2                               | 2.67                | NA    | NA      |  |
| O15348                                                                                              | V-type proton ATPase subunit G1                                          | 1                               | 2.62                | NA    | NA      |  |
| O15943                                                                                              | NEED8                                                                    | 2                               | 2.55                | NA    | NA      |  |
| Q99729                                                                                              | Heterogeneous nuclear ribonucleoprotein A/B                              | 2                               | 2.53                | NA    | NA      |  |
| P38337                                                                                              | Aldehyde dehydrogenase X, mitochondrial                                  | 3                               | 2.51                | 0.217 | 0.051   |  |
| P04233                                                                                              | HLA class II histocompatibility antigen gamma chain                      | 1                               | 2.50                | NA    | NA      |  |
| Q96706                                                                                              | Melanophilin                                                             | 3                               | 2.48                | 0.438 | 0.173   |  |
| P23586                                                                                              | Eukaryotic translation initiation factor 4B                              | 1                               | 2.46                | NA    | NA      |  |
| O14378                                                                                              | UDP-glucose 4-epimerase                                                  | 1                               | 2.48                | NA    | NA      |  |
| P20702                                                                                              | Integrin alpha-X                                                         | 1                               | 2.48                | NA    | NA      |  |
| Q3LXA3                                                                                              | Bifunctional ATP-dependent dihydroxyacetone kinase/FAD-lyase (cyclizing) | 1                               | 2.47                | NA    | NA      |  |
| P55008                                                                                              | Allograft inflammatory factor 1                                          | 2                               | 2.46                | NA    | NA      |  |
| P06236                                                                                              | Beta-glucuronidase                                                       | 2                               | 2.46                | NA    | NA      |  |
| Q96UPO                                                                                              | EF-hand domain-containing protein D1                                     | 1                               | 2.44                | NA    | NA      |  |
| P04043                                                                                              | Serpin B9                                                                | 1                               | 2.43                | NA    | NA      |  |
| P02796                                                                                              | Transferin receptor protein 1                                            | 1                               | 2.43                | NA    | NA      |  |
| P02792                                                                                              | Ferritin light chain                                                     | 1                               | 2.43                | NA    | NA      |  |
| Q9UJ46                                                                                              | Proteasome activator complex subunit 2                                   | 3                               | 2.43                | 0.364 | 0.136   |  |
| P56346                                                                                              | Neurophil elastase                                                       | 1                               | 2.42                | NA    | NA      |  |
| Q15181                                                                                              | Inorganic pyrophosphatase                                                | 3                               | 2.41                | 0.352 | 0.138   |  |
| Q9Y106                                                                                              | Ubiquitin-fold modifier-conjugating enzyme 1                             | 1                               | 2.40                | NA    | NA      |  |
| Q61896                                                                                              | LM domain acid-binding protein 1                                         | 1                               | 2.38                | NA    | NA      |  |
| P19871                                                                                              | Thymidine phosphorylase                                                  | 3                               | 2.38                | 0.405 | 0.204   |  |
| P51688                                                                                              | N-sulphoglucosamine sulphohydrolase                                      | 1                               | 2.38                | NA    | NA      |  |
| P61918                                                                                              | Epididymal secretory protein E1                                          | 1                               | 2.38                | NA    | NA      |  |
| Q03154                                                                                              | Aminopyruvate-1                                                          | 1                               | 2.37                | NA    | NA      |  |
| P28491                                                                                              | Cyclin-dependent kinase 2                                                | 1                               | 2.35                | NA    | NA      |  |
| Q63HND                                                                                              | E3 ubiquitin-protein ligase RNF213                                       | 1                               | 2.35                | NA    | NA      |  |
| Q9Y133                                                                                              | Dipeptidyl peptidase 3                                                   | 1                               | 2.34                | NA    | NA      |  |
| Q13573                                                                                              | SNW domain-containing protein 1                                          | 1                               | 2.34                | NA    | NA      |  |
| P02765                                                                                              | Alpha-2-HS-glycoprotein                                                  | 4                               | 2.34                | 0.383 | 0.113   |  |
| P10219                                                                                              | Lysosomal protective protein                                             | 1                               | 2.33                | NA    | NA      |  |
| Q13303                                                                                              | Voltage-gated potassium channel subunit beta-2                           | 1                               | 2.31                | NA    | NA      |  |
| P28065                                                                                              | Proteasome subunit beta type-9                                           | 1                               | 2.31                | NA    | NA      |  |
| P07093                                                                                              | Glia-derived neuron                                                      | 3                               | 2.30                | 0.211 | 0.059   |  |
| P14550                                                                                              | Alcohol dehydrogenase [NAD(P)]                                           | 3                               | 2.30                | 0.203 | 0.054   |  |
| P01620                                                                                              | Ig kappa chain V8H region SIE                                            | 1                               | 2.30                | NA    | NA      |  |
| Q8LW89                                                                                              | Transmembrane protein 205                                                | 1                               | 2.29                | NA    | NA      |  |
| P05155                                                                                              | Plasma protease C1 inhibitor                                             | 2                               | 2.28                | NA    | NA      |  |
| Q9P9U2                                                                                              | Neutral cholesterol ester hydrolase 1                                    | 1                               | 2.28                | NA    | NA      |  |
| P19426                                                                                              | Annexin A3                                                               | 1                               | 2.25                | NA    | NA      |  |
| Q13442                                                                                              | 28 kDa heat- and acid-stable phosphoprotein                              | 2                               | 2.23                | NA    | NA      |  |
| P10412                                                                                              | Histone H1.4                                                             | 1                               | 2.22                | NA    | NA      |  |
| P10721                                                                                              | Maststem cell growth factor receptor Kit                                 | 1                               | 2.22                | NA    | NA      |  |
| P18188                                                                                              | HLA class I histocompatibility antigen, A-30 alpha chain                 | 1                               | 2.22                | NA    | NA      |  |
| P48537                                                                                              | Glutathione synthetase                                                   | 1                               | 2.21                | NA    | NA      |  |

Table S16-Average Metastatic Tumors

|        |                                                                 |   |      |       |       |
|--------|-----------------------------------------------------------------|---|------|-------|-------|
| Q6Y14  | Peptidyl-prolyl cis-trans isomerase FKBP11                      | 2 | 2.21 | NA    | NA    |
| P81173 | 60S ribosomal protein L38                                       | 1 | 2.20 | NA    | NA    |
| Q9Y112 | WAC4 (ribonucleoprotein complex subunit 1)                      | 1 | 2.20 | NA    | NA    |
| O68A00 | Dehydrogenase/reductase SDR family member 7B                    | 1 | 2.20 | NA    | NA    |
| Q52020 | Gamma-glutamyl hydrolase                                        | 2 | 2.19 | NA    | NA    |
| Q13435 | Splicing factor 3B subunit 2                                    | 2 | 2.17 | NA    | NA    |
| Q43776 | Asparagine-RNA ligase, cytoplasmic                              | 2 | 2.17 | NA    | NA    |
| P04440 | HLA class II histocompatibility antigen, DP beta 1 chain        | 2 | 2.16 | NA    | NA    |
| PE2828 | GTP-binding nuclear protein Ran                                 | 5 | 2.15 | 0.097 | 0.001 |
| Q13576 | Pas GTPase-activating-like protein IQGAP2                       | 1 | 2.15 | NA    | NA    |
| P00751 | Complement factor B                                             | 1 | 2.14 | NA    | NA    |
| P13639 | Elongation factor 2                                             | 5 | 2.13 | 0.129 | 0.004 |
| P52015 | 36S ribosomal protein L12, mitochondrial                        | 2 | 2.13 | NA    | NA    |
| P03044 | Pterostedatin 5, mitochondrial                                  | 2 | 2.12 | 0.076 | 0.001 |
| P20618 | Proteasome subunit beta type-1                                  | 4 | 2.12 | 0.136 | 0.012 |
| Q9P405 | Muscleblind-like protein 1                                      | 1 | 2.10 | NA    | NA    |
| P11215 | Integrin alpha-M                                                | 1 | 2.10 | NA    | NA    |
| P52029 | 6-phosphogluconate dehydrogenase, decarboxylating               | 1 | 2.09 | NA    | NA    |
| Q06688 | Acidic leucine-rich nuclear phosphoprotein 32 family member B   | 5 | 2.09 | 0.081 | 0.001 |
| O86UO7 | Fermitin family homology 3                                      | 2 | 2.08 | NA    | NA    |
| O59K94 | Cytosolic non-specific dipeptidase                              | 4 | 2.08 | 0.157 | 0.019 |
| A40196 | WD repeat-containing protein 91                                 | 2 | 2.08 | NA    | NA    |
| P13797 | Plastin-3                                                       | 4 | 2.07 | 0.126 | 0.010 |
| O6S380 | Galectin-3-binding protein                                      | 4 | 2.07 | 0.145 | 0.016 |
| Q13243 | Serine/arginine-rich splicing factor 5                          | 4 | 2.07 | NA    | NA    |
| Q42224 | Signal transducer and activator of transcription 1-alpha/beta   | 3 | 2.06 | 0.390 | 0.206 |
| Q12906 | Interleukin enhancer-binding factor 3                           | 5 | 2.05 | 0.030 | 0.000 |
| P52069 | Activated RNA polymerase II transcriptional coactivator p15     | 3 | 2.05 | 0.066 | 0.008 |
| O96D65 | Regulator of microtubule dynamics protein 1                     | 1 | 2.05 | NA    | NA    |
| O13371 | Eukaryotic translation initiation factor 3 subunit D            | 1 | 2.04 | NA    | NA    |
| P21599 | Cytoplasmic aspartate hydratase                                 | 1 | 2.03 | NA    | NA    |
| P36871 | Phosphoglucomutase-1                                            | 2 | 2.03 | NA    | NA    |
| Q9C930 | Putative 40S ribosomal protein S10-like                         | 5 | 2.02 | NA    | NA    |
| P25788 | Proteasome subunit alpha type-3                                 | 4 | 2.02 | 0.134 | 0.013 |
| Q99253 | Sirtuin                                                         | 3 | 2.02 | 0.237 | 0.097 |
| Q02725 | Mitochondrial fission factor                                    | 2 | 2.02 | NA    | NA    |
| O75874 | Isocitrate dehydrogenase [NADP] cytoplasmic                     | 2 | 2.02 | NA    | NA    |
| P45588 | Alanine-RNA ligase, cytoplasmic                                 | 1 | 2.01 | NA    | NA    |
| PE2750 | 60S ribosomal protein L26a                                      | 4 | 2.01 | 0.198 | 0.039 |
| P52786 | Proteasome subunit alpha type-1                                 | 5 | 2.01 | 0.191 | 0.022 |
| Q00154 | Cytosolic acyl coenzyme A thioester hydrolase                   | 3 | 2.01 | 0.063 | 0.014 |
| PE2857 | 40S ribosomal protein S28                                       | 2 | 2.00 | NA    | NA    |
| Q00338 | L-lactate dehydrogenase A chain                                 | 5 | 2.00 | 0.195 | 0.024 |
| Q14978 | Nucleolar and coiled-body phosphoprotein 1                      | 1 | 1.99 | NA    | NA    |
| Q02763 | Alpha-1-acid glycoprotein 1                                     | 3 | 1.99 | 0.480 | 0.289 |
| PE4077 | ADP-ribosylation factor 1                                       | 3 | 1.99 | 0.224 | 0.052 |
| P48973 | Chromobox protein homolog 5                                     | 5 | 1.98 | NA    | NA    |
| PE8238 | Heat shock protein HSP 90-beta                                  | 5 | 1.97 | 0.125 | 0.006 |
| P13489 | Ribonuclease inhibitor                                          | 2 | 1.97 | NA    | NA    |
| Q07855 | Serine/arginine-rich splicing factor 1                          | 5 | 1.96 | 0.134 | 0.007 |
| P00734 | Prothrombin                                                     | 2 | 1.96 | NA    | NA    |
| PE2158 | Calmodulin                                                      | 5 | 1.96 | 0.111 | 0.004 |
| O14561 | Axyl carrier protein, mitochondrial                             | 1 | 1.95 | NA    | NA    |
| Q01130 | Serine/arginine-rich splicing factor 2                          | 2 | 1.94 | NA    | NA    |
| O68841 | Eukaryotic translation initiation factor 5B                     | 1 | 1.94 | NA    | NA    |
| Q9UKV3 | Apoptotic chromatin condensation inducer in the nucleus         | 2 | 1.94 | NA    | NA    |
| P54819 | Adenylate kinase 2, mitochondrial                               | 4 | 1.93 | 0.106 | 0.008 |
| Q12931 | Heat shock protein 75 Da, mitochondrial                         | 1 | 1.94 | NA    | NA    |
| P13760 | HLA class II histocompatibility antigen, DRB1-4 beta chain      | 1 | 1.92 | NA    | NA    |
| Q00323 | Proteasome activator complex subunit 1                          | 5 | 1.92 | 0.194 | 0.028 |
| Q01291 | Thyroid hormone receptor-associated protein 3                   | 3 | 1.92 | NA    | NA    |
| P48778 | 60S ribosomal protein L27a                                      | 3 | 1.91 | 0.059 | 0.008 |
| P28506 | Proteasome subunit alpha type-5                                 | 4 | 1.91 | 0.231 | 0.068 |
| P49029 | Maize dehydrogenase, mitochondrial                              | 5 | 1.91 | 0.192 | 0.028 |
| O70883 | WD repeat-containing protein 1                                  | 5 | 1.91 | 0.084 | 0.002 |
| Q9H111 | UDP-glucose 4-epimerase                                         | 1 | 1.91 | NA    | NA    |
| P55809 | Succinyl-CoA:3-ketoacid coenzyme A transferase 1, mitochondrial | 3 | 1.90 | 0.173 | 0.066 |
| Q00900 | Proteasome subunit alpha type-6                                 | 3 | 1.90 | 0.101 | 0.024 |
| P00M83 | Protein SITS3P                                                  | 2 | 1.90 | NA    | NA    |
| Q9HC38 | Glyoxalase domain-containing protein 4                          | 2 | 1.89 | NA    | NA    |
| PE2766 | Transferrin                                                     | 2 | 1.89 | NA    | NA    |
| P19102 | Transferrin-2                                                   | 3 | 1.88 | 0.037 | 0.003 |
| Q8N183 | Mimilin, mitochondrial                                          | 1 | 1.88 | NA    | NA    |
| O66385 | CKII regulatory subunit-associated protein 3                    | 1 | 1.88 | NA    | NA    |
| P29338 | Cytosol aminopeptidase                                          | 1 | 1.87 | 0.267 | 0.105 |
| P48773 | Histidine triad nucleotide-binding protein 1                    | 3 | 1.87 | 0.317 | 0.187 |
| P68670 | Vimentin                                                        | 5 | 1.87 | 0.282 | 0.061 |
| PE3279 | SUMO-conjugating enzyme UBC9                                    | 2 | 1.87 | NA    | NA    |
| Q9H911 | DnaJ homolog subfamily C member 11                              | 1 | 1.86 | NA    | NA    |
| P36867 | Acidic leucine-rich nuclear phosphoprotein 32 family member A   | 1 | 1.86 | 0.137 | 0.020 |
| P35288 | 60S ribosomal protein L22                                       | 1 | 1.86 | NA    | NA    |
| P07854 | Fumarate hydratase, mitochondrial                               | 2 | 1.85 | NA    | NA    |
| P13737 | Transaldolase                                                   | 5 | 1.85 | 0.066 | 0.001 |
| Q8Z025 | Selenoprotein H                                                 | 2 | 1.84 | NA    | NA    |
| Q33769 | Mitochondrial 10-formyltetrahydrofolate dehydrogenase           | 2 | 1.84 | NA    | NA    |
| Q96241 | Thiosulfonate-related transmembrane protein 1                   | 1 | 1.83 | NA    | NA    |
| O00299 | Chloride intracellular channel protein 1                        | 4 | 1.83 | 0.079 | 0.005 |
| P38955 | Pigment epithelium-derived factor                               | 3 | 1.83 | 0.313 | 0.183 |
| P01889 | HLA class I histocompatibility antigen, B*7 alpha chain         | 1 | 1.83 | NA    | NA    |
| P36504 | HLA class I histocompatibility antigen, Cw*4 alpha chain        | 1 | 1.82 | NA    | NA    |
| P07602 | Prospasin                                                       | 5 | 1.81 | 0.150 | 0.010 |
| Q7Z7H5 | Transmembrane emp24 domain-containing protein 4                 | 1 | 1.81 | NA    | NA    |
| O8M251 | Plasminogen activator inhibitor 1 RNA-binding protein           | 3 | 1.81 | 0.121 | 0.039 |
| P12929 | Beta-enkephalin                                                 | 1 | 1.81 | NA    | NA    |
| Q76351 | Vacuolar protein sorting-associated protein 4B                  | 1 | 1.80 | NA    | NA    |
| P07910 | Heterogeneous nuclear ribonucleoproteins C1/C2                  | 5 | 1.80 | 0.071 | 0.001 |
| Q06A86 | Protein VAC4 homolog                                            | 2 | 1.80 | NA    | NA    |
| Q96538 | Leguman                                                         | 1 | 1.79 | NA    | NA    |
| O66424 | Leucine-rich repeat-containing protein 59                       | 4 | 1.79 | 0.119 | 0.016 |
| P24821 | Tetraspan                                                       | 1 | 1.78 | NA    | NA    |
| P52786 | Puromycin-sensitive aminopeptidase                              | 4 | 1.78 | 0.054 | 0.003 |
| P12004 | Proliferating cell nuclear antigen                              | 1 | 1.77 | NA    | NA    |
| O00907 | Nucleolar protein 56                                            | 3 | 1.77 | 0.185 | 0.091 |
| P43243 | Matrin-3                                                        | 3 | 1.76 | 0.063 | 0.012 |
| O15007 | Ras-related protein Rab-11B                                     | 5 | 1.75 | 0.115 | 0.028 |
| PE1204 | ADP-ribosylation factor 3                                       | 2 | 1.75 | NA    | NA    |
| O15631 | Translin                                                        | 3 | 1.75 | 0.047 | 0.007 |
| PE2811 | Glutathione S-transferase P                                     | 5 | 1.74 | 0.156 | 0.024 |
| P21796 | Voltage-dependent anion-selective channel protein 1             | 5 | 1.74 | 0.160 | 0.025 |
| Q43399 | Tumor protein D54                                               | 3 | 1.74 | 0.056 | 0.010 |
| Q00341 | Myosin                                                          | 1 | 1.74 | NA    | NA    |
| P30040 | Endoplasmic reticulum resident protein 29                       | 3 | 1.73 | 0.335 | 0.242 |
| Q9Y496 | AFCS-like protein 2                                             | 5 | 1.73 | 0.084 | 0.003 |
| P36543 | V-type proton ATPase subunit E 1                                | 5 | 1.73 | 0.143 | 0.019 |
| PE6753 | Topomycin alpha-3 chain                                         | 5 | 1.72 | 0.191 | 0.047 |
| Q00160 | Unconventional myosin-III                                       | 2 | 1.72 | NA    | NA    |
| P05990 | Apolipoprotein D                                                | 1 | 1.72 | NA    | NA    |
| P05141 | ADP/ATP translocase 2                                           | 4 | 1.71 | 0.062 | 0.003 |
| Q00688 | Peptidyl-prolyl cis-trans isomerase FKBP3                       | 2 | 1.71 | NA    | NA    |
| P22314 | Ubiquitin-like modifier-activating enzyme 1                     | 5 | 1.70 | 0.085 | 0.003 |
| O68225 | Apoptosis inhibitor 5                                           | 4 | 1.70 | 0.065 | 0.004 |
| P28446 | Isovaleryl-CoA dehydrogenase, mitochondrial                     | 1 | 1.70 | NA    | NA    |
| PE6737 | Glycogen phosphorylase, liver form                              | 5 | 1.70 | 0.394 | 0.249 |
| P48426 | Phosphatidylinositol 5-phosphate 4-kinase type-2 alpha          | 3 | 1.70 | 0.178 | 0.096 |
| PE6874 | Cytochrome c1, heme protein, mitochondrial                      | 5 | 1.70 | 0.237 | 0.111 |
| Q18629 | Serine/arginine-rich splicing factor 7                          | 2 | 1.70 | NA    | NA    |
| O8M474 | Alpha-beta hydrolase domain-containing protein 11               | 1 | 1.70 | NA    | NA    |
| P00441 | Superoxide dismutase [Cu-Zn]                                    | 3 | 1.70 | 0.171 | 0.091 |
| P99999 | Cytochrome c                                                    | 5 | 1.69 | 0.216 | 0.071 |
| P10155 | 60 kDa SIA-Ribonucleoprotein                                    | 1 | 1.69 | NA    | NA    |
| Q12905 | Interleukin enhancer-binding factor 2                           | 5 | 1.69 | 0.051 | 0.001 |
| Q9J922 | Inorganic pyrophosphatase 2, mitochondrial                      | 4 | 1.68 | 0.123 | 0.024 |
| P49792 | E3 SUMO-protein ligase RanBP2                                   | 1 | 1.65 | NA    | NA    |
| Q9Y203 | Glutathione S-transferase kappa 1                               | 4 | 1.68 | 0.231 | 0.111 |
| PE6847 | 40S ribosomal protein S24                                       | 1 | 1.67 | NA    | NA    |
| P90195 | 4F2 cell-surface antigen heavy chain                            | 1 | 1.67 | 0.100 | 0.017 |
| Q07960 | Rho GTPase-activating protein 1                                 | 5 | 1.67 | 0.132 | 0.018 |
| Q549X3 | Presenquence protease, mitochondrial                            | 3 | 1.66 | 0.062 | 0.010 |
| Q14103 | Heterogeneous nuclear ribonucleoprotein D0                      | 5 | 1.66 | 0.141 | 0.023 |
| O78822 | Eukaryotic translation initiation factor 3 subunit J            | 1 | 1.66 | NA    | NA    |
| O14737 | Programmed cell death protein 5                                 | 1 | 1.65 | NA    | NA    |
| O00560 | Syntenin-1                                                      | 2 | 1.65 | NA    | NA    |
| O76021 | Ribosomal L1 domain-containing protein 1                        | 3 | 1.65 | 0.159 | 0.088 |
| Q83A03 | Putative peptidyl-RNA hydrolase PTPRD1                          | 1 | 1.65 | NA    | NA    |
| P46783 | 40S ribosomal protein S10                                       | 2 | 1.65 | NA    | NA    |
| O68945 | FACT complex subunit SSRP1                                      | 2 | 1.64 | NA    | NA    |
| Q13423 | NAD(P)+ dehydrogenase, mitochondrial                            | 5 | 1.64 | 0.088 | 0.005 |
| P23284 | Peptidyl-prolyl cis-trans isomerase B                           | 5 | 1.64 | 0.086 | 0.004 |
| P56387 | 60S acidic ribosomal protein P2                                 | 5 | 1.64 | 0.163 | 0.039 |
| P91769 | Beta-2-microglobulin                                            | 3 | 1.63 | 0.225 | 0.161 |
| O00839 | Heterogeneous nuclear ribonucleoprotein U                       | 5 | 1.63 | 0.120 | 0.015 |
| Q96C19 | EF-hand domain-containing protein D2                            | 3 | 1.63 | 0.107 | 0.045 |
| P16402 | Histone H1.3                                                    | 1 | 1.63 | NA    | NA    |
| O8YV72 | Protein ANNA2                                                   | 4 | 1.62 | 0.253 | 0.152 |
| Q13547 | Histone deacetylase 1                                           | 1 | 1.62 | NA    | NA    |
| Q95182 | NADH dehydrogenase [ubiquinone] 1 alpha subcomplex subunit 7    | 1 | 1.62 | NA    | NA    |
| Q02818 | Nucleobindin-1                                                  | 4 | 1.62 | 0.025 | 0.000 |
| P98426 | High mobility group protein B1                                  | 1 | 1.62 | 0.188 | 0.064 |
| Q14979 | Heterogeneous nuclear ribonucleoprotein D-like                  | 3 | 1.61 | 0.100 | 0.041 |
| P68641 | Elongation factor 1-gamma                                       | 5 | 1.61 | 0.097 | 0.008 |
| P68621 | U1 small nuclear ribonucleoprotein 70 kDa                       | 1 | 1.60 | NA    | NA    |
| O06787 | Fragile X mental retardation protein 1                          | 3 | 1.60 | 0.154 | 0.104 |
| P38651 | Heterogeneous nuclear ribonucleoprotein A1                      | 5 | 1.60 | 0.055 | 0.001 |
| PE2241 | 40S ribosomal protein S8                                        | 4 | 1.60 | 0.096 | 0.016 |
| O15424 | Scaffold attachment factor B1                                   | 1 | 1.59 | NA    | NA    |
| P01034 | Cystatin C                                                      | 1 | 1.59 | NA    | NA    |
| PE2790 | Hempepin                                                        | 5 | 1.58 | 0.223 | 0.109 |
| P18669 | Phosphoglycerate mutase 1                                       | 5 | 1.58 | 0.165 | 0.050 |
| Q15083 | Perisatin                                                       | 3 | 1.58 | 0.207 | 0.263 |
| P35659 | Protein DEK                                                     | 1 | 1.58 | NA    | NA    |
| Q13263 | Transcription intermediary factor 1-beta                        | 4 | 1.58 | 0.073 | 0.008 |
| P30464 | HLA class I histocompatibility antigen, B*15 alpha chain        | 1 | 1.57 | NA    | NA    |
| O1KM03 | Heterogeneous nuclear ribonucleoprotein U-like protein 2        | 5 | 1.57 | 0.120 | 0.020 |
| O66296 | Voltage-gated hydrogen channel 1                                | 1 | 1.56 | NA    | NA    |
| P01625 | 10 kDa chain VVI region Len                                     | 2 | 1.56 | NA    | NA    |
| O9A185 | Switch-associated protein 70                                    | 2 | 1.56 | NA    | NA    |
| P25398 | 40S ribosomal protein S12                                       | 5 | 1.56 | 0.089 | 0.003 |
| P04075 | Fructose biphosphate aldolase A                                 | 2 | 1.55 | 0.039 | 0.000 |
| O9Y3X3 | Sorting nexin-5                                                 | 2 | 1.55 | NA    | NA    |
| P51810 | G-protein coupled receptor 143                                  | 1 | 1.55 | 0.159 | 0.050 |
| P51665 | 26S proteasome non-ATPase regulatory subunit 7                  | 2 | 1.55 | NA    | NA    |
| P07814 | Bi-functional glutamate-proline-RNA ligase                      | 2 | 1.55 | NA    | NA    |
| Q06211 | ATP-dependent RNA helicase A                                    | 5 | 1.55 | 0.088 | 0.011 |
| P30484 | HLA class I histocompatibility antigen, B-46 alpha chain        | 1 | 1.54 | NA    | NA    |
| P17540 | Creatine kinase S-type, mitochondrial                           | 2 | 1.54 | NA    | NA    |
| O43852 | Calumenin                                                       | 5 | 1.54 | 0.063 | 0.002 |
| PE2258 | 14-3-3 protein epsilon                                          | 4 | 1.54 | 0.064 | 0.007 |

Table S16-Average Metastatic Tumors

|         |                                                                              |   |      |       |       |
|---------|------------------------------------------------------------------------------|---|------|-------|-------|
| Q16698  | 2,4-dienyl-CoA reductase, mitochondrial                                      | 5 | 1.53 | 0.081 | 0.006 |
| Q26816  | Transitional activator GCN1                                                  | 1 | 1.53 | NA    | NA    |
| Q73390  | Citrate synthase, mitochondrial                                              | 5 | 1.53 | 0.050 | 0.001 |
| P14854  | Cytochrome c oxidase subunit 8B1                                             | 4 | 1.52 | 0.122 | 0.041 |
| P30533  | Alpha-2-macroglobin receptor-associated protein                              | 5 | 1.52 | 0.076 | 0.005 |
| Q14247  | Src substrate cortactin                                                      | 4 | 1.52 | 0.106 | 0.029 |
| P61604  | 10 kDa heat shock protein, mitochondrial                                     | 5 | 1.51 | 0.278 | 0.211 |
| Q27346  | 14-3-3 protein eta                                                           | 1 | 1.51 | 0.117 | 0.039 |
| P09668  | Pro-cathepsin H                                                              | 1 | 1.51 | NA    | NA    |
| Q07020  | 60S ribosomal protein L18                                                    | 2 | 1.51 | NA    | NA    |
| P02042  | Hemoglobin subunit beta                                                      | 2 | 1.51 | 0.725 | 0.627 |
| P31011  | Protein disulfide-isomerase A3                                               | 5 | 1.51 | 0.118 | 0.026 |
| P31859  | Ig gamma-2 chain C region                                                    | 4 | 1.51 | 0.337 | 0.311 |
| Q01518  | Adenyl cyclase-associated protein 1                                          | 2 | 1.51 | NA    | NA    |
| P36748  | Flap endonuclease 1                                                          | 2 | 1.51 | NA    | NA    |
| P46940  | Ras GTPase-activating-like protein IQGAP1                                    | 5 | 1.51 | 0.066 | 0.002 |
| P10809  | 60 kDa heat shock protein, mitochondrial                                     | 5 | 1.50 | 0.064 | 0.003 |
| Q9Y3D0  | Mitotic spindle-associated MXD complex subunit MP18                          | 1 | 1.50 | NA    | NA    |
| P61619  | Ras-related protein Rab-2A                                                   | 1 | 1.50 | NA    | NA    |
| Q9G273  | SRA stem-loop-interacting RNA-binding protein, mitochondrial                 | 2 | 1.50 | NA    | NA    |
| P31150  | Rab GDP dissociation inhibitor alpha                                         | 1 | 1.50 | NA    | NA    |
| Q9Y628  | Mitochondrial carrier homology 2                                             | 3 | 1.49 | 0.137 | 0.089 |
| P22628  | Heterogeneous nuclear ribonucleoproteins A2/B1                               | 5 | 1.49 | 0.065 | 0.004 |
| P42704  | Leucine-rich PPR motif-containing protein, mitochondrial                     | 4 | 1.48 | 0.097 | 0.027 |
| P31149  | Ras-related protein Rab-7a                                                   | 1 | 1.48 | 0.152 | 0.061 |
| Q96302  | Peptidyl prolyl cis-trans isomerase FKBP9                                    | 2 | 1.48 | NA    | NA    |
| P31949  | Protein S100-A11                                                             | 5 | 1.48 | 0.122 | 0.032 |
| Q43488  | Atlastin 51 alpha-2Npde reductase member 2                                   | 2 | 1.48 | NA    | NA    |
| Q71UM5  | 40S ribosomal protein S27-like                                               | 2 | 1.48 | NA    | NA    |
| Q9Y7E3  | Putative elongation factor 1-alpha-like 3                                    | 1 | 1.47 | 0.110 | 0.024 |
| P46926  | Glucosamine-6-phosphate isomerase 1                                          | 4 | 1.48 | 0.161 | 0.094 |
| Q10904  | V-type proton ATPase subunit S1                                              | 1 | 1.48 | NA    | NA    |
| P19335  | Cathepsin-1                                                                  | 1 | 1.47 | NA    | NA    |
| P08697  | Alpha-2-antiplasmin                                                          | 1 | 1.47 | NA    | NA    |
| P46739  | Phosphatidylinositol transfer protein beta isoform                           | 1 | 1.47 | NA    | NA    |
| Q12171  | ELAV-like protein 1                                                          | 1 | 1.47 | NA    | NA    |
| P46063  | ATP-dependent DNA helicase C1                                                | 1 | 1.47 | NA    | NA    |
| P37020  | Citabathione peroxidase 1                                                    | 1 | 1.46 | NA    | NA    |
| Q96873  | Protein arginine N-methyltransferase 1                                       | 2 | 1.46 | NA    | NA    |
| P30405  | Peptidyl prolyl cis-trans isomerase F, mitochondrial                         | 2 | 1.46 | NA    | NA    |
| P65220  | 40S ribosomal protein S21                                                    | 1 | 1.46 | NA    | NA    |
| P09661  | U2 small nuclear ribonucleoprotein A'                                        | 1 | 1.46 | NA    | NA    |
| Q86UE4  | Protein LYRIC                                                                | 4 | 1.45 | 0.139 | 0.074 |
| Q86UE7  | Sulfatase-modifying factor 2                                                 | 3 | 1.45 | 0.272 | 0.202 |
| P18621  | 60S ribosomal protein L17                                                    | 2 | 1.45 | 0.128 | 0.061 |
| P14317  | Hemopoietic lineage cell-specific protein                                    | 2 | 1.45 | NA    | NA    |
| Q9LX08  | RNA-binding protein Raly                                                     | 5 | 1.45 | 0.078 | 0.008 |
| P62263  | 40S ribosomal protein S14                                                    | 5 | 1.45 | 0.147 | 0.066 |
| Q9P2R7  | Succinyl-CoA ligase [ADP-forming] subunit beta, mitochondrial                | 2 | 1.45 | NA    | NA    |
| P62361  | 40S ribosomal protein S25                                                    | 5 | 1.44 | 0.164 | 0.090 |
| P16610  | Extracellular matrix protein 1                                               | 2 | 1.44 | NA    | NA    |
| P61421  | V-type proton ATPase subunit d 1                                             | 5 | 1.44 | 0.137 | 0.056 |
| Q14874  | Importin subunit beta 1                                                      | 5 | 1.44 | 0.110 | 0.029 |
| Q75533  | Splicing factor SF2 subunit 1                                                | 3 | 1.44 | 0.078 | 0.040 |
| Q9614   | Tetranoptin-peptide repeat protein 1                                         | 1 | 1.44 | NA    | NA    |
| Q571M5  | FK506-binding protein 15                                                     | 1 | 1.44 | NA    | NA    |
| Q81955  | Transmembrane protein 192                                                    | 1 | 1.43 | NA    | NA    |
| P62136  | Serine-threonine-protein phosphatase PP1-alpha catalytic subunit             | 4 | 1.43 | 0.061 | 0.008 |
| P62829  | 60S ribosomal protein L23                                                    | 4 | 1.43 | 0.102 | 0.040 |
| Q92690  | Ubiquitin ligation degradation protein beta isoform                          | 2 | 1.43 | NA    | NA    |
| Q92692  | Fer cutaneous element-binding protein 2                                      | 1 | 1.43 | 0.051 | 0.008 |
| Q73380  | NADH dehydrogenase [ubiquinone] iron-sulfur protein 6, mitochondrial         | 2 | 1.43 | NA    | NA    |
| P54136  | Arginine-tRNA ligase, cytoplasmic                                            | 5 | 1.43 | 0.117 | 0.038 |
| P51159  | Ras-related protein Rab-27a                                                  | 3 | 1.43 | 0.073 | 0.040 |
| Q99798  | Acetate thioester hydrolase, mitochondrial                                   | 5 | 1.43 | 0.086 | 0.014 |
| P13804  | Electron transfer flavoprotein subunit alpha, mitochondrial                  | 2 | 1.43 | NA    | NA    |
| P52597  | Heterogeneous nuclear ribonucleoprotein F                                    | 4 | 1.42 | 0.028 | 0.001 |
| Q9A6Z7  | Glyoxylate reductase/hydroxyypyruvate reductase                              | 1 | 1.42 | NA    | NA    |
| P75227  | DNA-dependent protein kinase catalytic subunit                               | 5 | 1.42 | 0.116 | 0.038 |
| P11142  | Heat shock cognate 71 kDa protein                                            | 5 | 1.42 | 0.049 | 0.002 |
| Q967C7  | Regulator of microtubule dynamics protein 3                                  | 2 | 1.42 | NA    | NA    |
| P02746  | Complement C1c subcomponent subunit B                                        | 3 | 1.42 | NA    | NA    |
| Q49207  | 60S ribosomal protein L34                                                    | 4 | 1.42 | 0.133 | 0.077 |
| Q9Y5J7  | Mitochondrial import inner membrane translocase subunit Tim9                 | 1 | 1.42 | NA    | NA    |
| P62081  | 40S ribosomal protein S7                                                     | 2 | 1.42 | NA    | NA    |
| Q9NYL2  | UDP-glucose-glycoprotein glucosyltransferase 1                               | 2 | 1.42 | NA    | NA    |
| P07237  | Protein disulfide-isomerase                                                  | 5 | 1.42 | 0.089 | 0.025 |
| Q06410  | Importin-5                                                                   | 2 | 1.41 | NA    | NA    |
| P29728  | Z'-5'-oligoadenylate synthase 2                                              | 1 | 1.41 | NA    | NA    |
| P29692  | Elongation factor 1-delta                                                    | 1 | 1.41 | 0.153 | 0.060 |
| Q15118  | Niemann-Pick C1 protein                                                      | 2 | 1.41 | NA    | NA    |
| Q97383  | Putative RNA-binding protein Luc7-like 2                                     | 3 | 1.41 | 0.210 | 0.242 |
| Q92598  | Heat shock protein 105 kDa                                                   | 1 | 1.41 | NA    | NA    |
| Q16836  | Hydroxyacyl-coenzyme A dehydrogenase, mitochondrial                          | 3 | 1.41 | 0.097 | 0.071 |
| P63731  | 60S ribosomal protein L24                                                    | 4 | 1.41 | 0.215 | 0.207 |
| Q96972  | FXR coreceptor 1                                                             | 3 | 1.41 | 0.385 | 0.465 |
| Q14677  | Cathepsin interactor 1                                                       | 2 | 1.41 | NA    | NA    |
| P36204  | Enoyl-CoA hydratase, mitochondrial                                           | 4 | 1.41 | 0.033 | 0.002 |
| Q96989  | Succinyl-CoA ligase [GDP-forming] subunit beta, mitochondrial                | 1 | 1.41 | NA    | NA    |
| Q9A6Z2  | NSFL1 cofactor p47                                                           | 1 | 1.41 | NA    | NA    |
| P37108  | Signal recognition particle 14 kDa protein                                   | 2 | 1.41 | NA    | NA    |
| Q92699  | NADH dehydrogenase [ubiquinone] 1 alpha subcomplex subunit 10, mitochondrial | 2 | 1.41 | NA    | NA    |
| Q15366  | Poly(C)-binding protein 2                                                    | 1 | 1.41 | NA    | NA    |
| Q97919  | Cytochrome b-c1 complex subunit 6, mitochondrial                             | 4 | 1.40 | 0.281 | 0.314 |
| Q9Y2B0  | Protein canopy homolog 2                                                     | 1 | 1.40 | NA    | NA    |
| Q94960  | Ras-related GTP-binding protein C                                            | 1 | 1.40 | NA    | NA    |
| P14904  | NADH dehydrogenase [ubiquinone] flavoprotein 2, mitochondrial                | 5 | 1.40 | NA    | NA    |
| Q13123  | Protein Red                                                                  | 1 | 1.40 | NA    | NA    |
| P21283  | V-type proton ATPase subunit C 1                                             | 3 | 1.40 | 0.089 | 0.064 |
| P21599  | Polypyrimidine tract-binding protein 1                                       | 5 | 1.40 | 0.047 | 0.002 |
| Q96336  | Synaptic vesicle membrane protein VAMP1 homolog                              | 5 | 1.40 | 0.174 | 0.127 |
| P11627  | Killer-alpha-lysin inhibitor heavy chain H1                                  | 1 | 1.40 | NA    | NA    |
| P16219  | Short-chain specific acyl-CoA dehydrogenase, mitochondrial                   | 3 | 1.39 | 0.040 | 0.015 |
| P13010  | X-ray repair cross-complementing protein 5                                   | 5 | 1.39 | 0.046 | 0.002 |
| Q9A9X1  | Poly(I)-binding-splicing factor PUF60                                        | 4 | 1.39 | 0.070 | 0.019 |
| P27144  | Adenylate kinase 4, mitochondrial                                            | 1 | 1.39 | NA    | NA    |
| P12270  | Nucleoprotein TPR                                                            | 4 | 1.38 | 0.068 | 0.018 |
| P62140  | Serine-threonine-protein phosphatase PP1-beta catalytic subunit              | 1 | 1.38 | NA    | NA    |
| P21291  | Cysteine and glycine-rich protein 1                                          | 1 | 1.38 | NA    | NA    |
| Q10665  | Melanoma antigen recognized by T-cells 1                                     | 1 | 1.37 | NA    | NA    |
| Q92622  | Dihydropyridyl dehydrogenase, mitochondrial                                  | 1 | 1.37 | 0.069 | 0.002 |
| P14408  | Cytochrome c oxidase subunit 7A2, mitochondrial                              | 1 | 1.37 | NA    | NA    |
| Q9A917  | 14-3-3 protein eta                                                           | 1 | 1.37 | NA    | NA    |
| Q13817  | CuIin-2                                                                      | 1 | 1.37 | NA    | NA    |
| P11137  | Microtubule-associated protein 2                                             | 1 | 1.37 | NA    | NA    |
| P05388  | 60S acidic ribosomal protein P0                                              | 4 | 1.36 | 0.034 | 0.001 |
| Q15145  | Actin-related protein 2/3 complex subunit 3                                  | 4 | 1.36 | 0.123 | 0.087 |
| P51608  | Methyl-CpG-binding protein 2                                                 | 3 | 1.36 | 0.272 | 0.375 |
| P49756  | RNA-binding protein 25                                                       | 1 | 1.36 | NA    | NA    |
| Q9N063  | Coiled-coil-helix-coiled-coil domain-containing protein 3, mitochondrial     | 4 | 1.36 | 0.063 | 0.016 |
| Q07021  | Complement component 1 Q subcomponent-binding protein, mitochondrial         | 2 | 1.36 | NA    | NA    |
| P56206  | 60S ribosomal protein L16a                                                   | 5 | 1.36 | 0.048 | 0.003 |
| Q15046  | Lysine-tRNA ligase                                                           | 3 | 1.36 | 0.239 | 0.330 |
| D14773  | Tyrosyl-DL-peptidase 1                                                       | 5 | 1.35 | 0.066 | 0.025 |
| P61247  | 40S ribosomal protein S3a                                                    | 4 | 1.35 | 0.106 | 0.046 |
| Q60506  | Heterogeneous nuclear ribonucleoprotein Q                                    | 4 | 1.35 | 0.095 | 0.050 |
| Q9A9F1  | Serine-tRNA ligase, mitochondrial                                            | 4 | 1.35 | 0.179 | 0.162 |
| P19367  | Hexokinase 1                                                                 | 5 | 1.35 | 0.185 | 0.179 |
| P0CV22  | 40S ribosomal protein S17-like                                               | 5 | 1.35 | 0.049 | 0.004 |
| P22059  | Oxytetracycline-binding protein 1                                            | 2 | 1.35 | NA    | NA    |
| Q08379  | Golgin subfamily A member 2                                                  | 1 | 1.35 | NA    | NA    |
| P08685  | 40S ribosomal protein SA                                                     | 5 | 1.35 | 0.089 | 0.029 |
| P61978  | Heterogeneous nuclear ribonucleoprotein K                                    | 1 | 1.34 | 0.091 | 0.031 |
| Q12904  | Aminoacyl-tRNA synthetase complex-interacting multifunctional protein 1      | 1 | 1.34 | NA    | NA    |
| Q9Y323  | Deoxyribose diphosphate triphosphohydrolase SAMHD1                           | 4 | 1.34 | 0.224 | 0.281 |
| Q9A726  | RNA-binding protein 12                                                       | 1 | 1.34 | 0.062 | 0.042 |
| P62191  | 26S protease regulatory subunit 4                                            | 2 | 1.34 | NA    | NA    |
| P15153  | Ras-related C3 botulinum toxin substrate 2                                   | 2 | 1.34 | NA    | NA    |
| Q43598  | Z'-deoxyribose 5'-phosphate N-hydrolase 1                                    | 1 | 1.34 | NA    | NA    |
| P36232  | Prohibitin                                                                   | 5 | 1.34 | 0.190 | 0.200 |
| Q9Y022  | STE20-like serine/threonine protein kinase                                   | 1 | 1.34 | NA    | NA    |
| P51991  | Heterogeneous nuclear ribonucleoprotein A3                                   | 5 | 1.33 | 0.078 | 0.021 |
| P43490  | Nicotinamide phosphoribosyltransferase                                       | 4 | 1.33 | 0.201 | 0.247 |
| Q96976  | Coronin-10                                                                   | 4 | 1.33 | 0.144 | 0.138 |
| Q16666  | Gamma-interferon-inducible protein 16                                        | 2 | 1.33 | NA    | NA    |
| Q00059  | Transcription factor A, mitochondrial                                        | 3 | 1.33 | 0.304 | 0.447 |
| Q90911  | THO complex subunit 4                                                        | 2 | 1.33 | NA    | NA    |
| Q00483  | NADH dehydrogenase [ubiquinone] 1 alpha subcomplex subunit 4                 | 4 | 1.33 | 0.175 | 0.204 |
| P56213  | Isocitrate dehydrogenase [NAD] subunit alpha, mitochondrial                  | 5 | 1.33 | 0.085 | 0.030 |
| Q9A971  | ATPase family AAA domain-containing protein 3A                               | 1 | 1.33 | 0.092 | 0.002 |
| P78347  | General transcription factor II-I                                            | 4 | 1.32 | 0.035 | 0.004 |
| P38606  | V-type proton ATPase catalytic subunit A                                     | 4 | 1.32 | 0.155 | 0.145 |
| P53597  | Succinyl-CoA ligase [ADP-forming] subunit alpha, mitochondrial               | 3 | 1.32 | 0.100 | 0.108 |
| Q10488  | V-type proton ATPase 116 kDa subunit a isoform 3                             | 2 | 1.32 | NA    | NA    |
| P12956  | X-ray repair cross-complementing protein 6                                   | 4 | 1.32 | 0.059 | 0.002 |
| P62979  | Ubiquitin-40S ribosomal protein S27a                                         | 2 | 1.32 | NA    | NA    |
| Q9Y3D9  | 26S ribosomal protein S23, mitochondrial                                     | 4 | 1.32 | NA    | NA    |
| P49721  | Proteasome subunit beta type-2                                               | 1 | 1.32 | NA    | NA    |
| Q9Y411  | Unconventional myosin-Va                                                     | 4 | 1.32 | 0.092 | 0.058 |
| P06675  | Receptor-type tyrosine-protein phosphatase C                                 | 2 | 1.32 | NA    | NA    |
| Q96272  | WD repeat-containing protein 81                                              | 5 | 1.32 | NA    | NA    |
| P62344  | Guanine nucleotide-binding protein subunit beta 2-like 1                     | 5 | 1.31 | 0.032 | 0.001 |
| P62661  | Destrin                                                                      | 1 | 1.31 | 0.169 | 0.186 |
| Q75436  | Nuclear protein sorting-associated protein 26A                               | 1 | 1.31 | NA    | NA    |
| P01857  | Ig gamma-1 chain C region                                                    | 5 | 1.31 | 0.307 | 0.428 |
| Q81802S | Estradiol 17-beta-dehydrogenase 11                                           | 1 | 1.31 | NA    | NA    |
| P53990  | IST1 homolog                                                                 | 1 | 1.31 | NA    | NA    |
| P41091  | Eukaryotic translation initiation factor 2 subunit 3                         | 1 | 1.31 | NA    | NA    |
| P62330  | ADP-ribosylation factor 6                                                    | 1 | 1.31 | NA    | NA    |
| Q43681  | ATPase ASNA1                                                                 | 1 | 1.30 | NA    | NA    |
| Q9NP24  | Prefoldin subunit 4                                                          | 1 | 1.30 | NA    | NA    |
| Q14152  | Eukaryotic translation initiation factor 3 subunit A                         | 1 | 1.30 | 0.034 | 0.001 |
| Q02774  | Vitamin D-binding protein                                                    | 5 | 1.30 | 0.354 | 0.496 |
| P36846  | Stress-70 protein, mitochondrial                                             | 5 | 1.30 | 0.067 | 0.017 |
| P52272  | Heterogeneous nuclear ribonucleoprotein M                                    | 4 | 1.30 | 0.093 | 0.049 |
| P30050  | 60S ribosomal protein L12                                                    | 3 | 1.30 | 0.115 | 0.152 |
| Q96623  | Prohibitin-2                                                                 | 5 | 1.29 | 0.184 | 0.256 |
| Q9P2E5  | Ribosome-binding protein 1                                                   | 5 | 1.29 | 0.117 | 0.094 |
| Q90669  | Cytochrome c oxidase subunit 6C                                              | 3 | 1.29 | 0.089 | 0.086 |
| Q51718  | Toran-1A-interacting protein 1                                               | 2 | 1.29 | NA    | NA    |
| Q96V6G  | Transmembrane etp24 domain-containing protein 9                              | 2 | 1.29 | NA    | NA    |
| P62639  | Threonine-tRNA ligase, cytoplasmic                                           | 1 | 1.28 | NA    | NA    |
| P62246  | 40S ribosomal protein S16                                                    | 1 | 1.28 | 0.031 | 0.001 |
| Q96805  | Transmembrane 9 superfamily member 2                                         | 2 | 1.28 | NA    | NA    |
| P38159  | PNA-binding motif protein, X chromosome                                      | 3 | 1.28 | 0.189 | 0.326 |
| P38176  | Lpx protease homolog, mitochondrial                                          | 1 | 1.28 | NA    | NA    |
| P54552  | Heat shock-related 70 kDa protein 2                                          | 5 | 1.27 | 0.129 | 0.133 |

Table S16-Average Metastatic Tumors

|        |                                                                             |   |      |       |       |
|--------|-----------------------------------------------------------------------------|---|------|-------|-------|
| P2885  | Peptidyl-prolyl cis-trans isomerase FKBP2                                   | 2 | 1.27 | NA    | NA    |
| Q89YF4 | Cullin-associated NEDD8-associated protein 1                                | 5 | 1.27 | 0.070 | 0.034 |
| Q94906 | Pre-mRNA-processing factor 5                                                | 2 | 1.27 | NA    | NA    |
| P59998 | Actin-related protein 2/3 complex subunit 4                                 | 5 | 1.27 | 0.137 | 0.155 |
| Q10225 | 118 kDa US small nuclear ribonucleoprotein component                        | 5 | 1.27 | 0.352 | 0.284 |
| Q9NYF8 | Bcl-2-associated transcription factor 1                                     | 1 | 1.27 | NA    | NA    |
| Q9L3V4 | Coronin-1C                                                                  | 3 | 1.27 | 0.087 | 0.114 |
| Q13998 | GPCR signalingosome complex subunit 1                                       | 1 | 1.28 | NA    | NA    |
| Q15233 | Non-POU domain-containing octamer-binding protein                           | 5 | 1.28 | 0.055 | 0.013 |
| P51572 | B-cell receptor-associated protein 31                                       | 5 | 1.28 | 0.133 | 0.155 |
| P24534 | Elongation factor 1 beta                                                    | 5 | 1.28 | 0.182 | 0.208 |
| P14886 | Heterogeneous nuclear ribonucleoprotein L                                   | 5 | 1.28 | 0.060 | 0.019 |
| Q9Y006 | Leucine-rich repeat flightless-interacting protein 2                        | 1 | 1.28 | NA    | NA    |
| Q9H8J5 | Procollagen galactosyltransferase 1                                         | 3 | 1.28 | 0.352 | 0.589 |
| P34832 | Heat shock 70 kDa protein A                                                 | 4 | 1.28 | 0.073 | 0.059 |
| P10644 | GMP-dependent protein kinase type I alpha regulatory subunit                | 4 | 1.28 | 0.128 | 0.174 |
| Q9G253 | WD repeat-containing protein 61                                             | 1 | 1.28 | NA    | NA    |
| P19823 | Inter-alpha-trypsin inhibitor heavy chain H2                                | 2 | 1.28 | NA    | NA    |
| Q75494 | Serinearginine-rich splicing factor 10                                      | 1 | 1.28 | NA    | NA    |
| Q98874 | Poly (ADP-ribose) polymerase 1                                              | 5 | 1.24 | 0.032 | 0.002 |
| P30042 | ES1 protein homolog, mitochondrial                                          | 4 | 1.24 | 0.219 | 0.396 |
| Q90268 | Histone-binding protein RBSP4                                               | 2 | 1.24 | NA    | NA    |
| Q96WU7 | Sideroflexin-3                                                              | 2 | 1.24 | NA    | NA    |
| Q15459 | Splicing factor 3A subunit 1                                                | 1 | 1.24 | NA    | NA    |
| Q00765 | Receptor expression-enhancing protein 5                                     | 1 | 1.24 | 0.128 | 0.156 |
| Q96202 | LETM1 and EF-hand domain-containing protein 1, mitochondrial                | 5 | 1.24 | 0.057 | 0.021 |
| Q8N263 | Monooxygenolipase ABHD12                                                    | 1 | 1.23 | NA    | NA    |
| P13674 | Prolyl 4-hydroxylase subunit alpha 1                                        | 3 | 1.23 | 0.088 | 0.140 |
| P27635 | 60S ribosomal protein L10                                                   | 5 | 1.23 | 0.084 | 0.068 |
| Q98Y13 | Peptidyl-prolyl cis-trans isomerase FKBP10                                  | 1 | 1.23 | NA    | NA    |
| Q43809 | Cleavage and polyadenylation specificity factor subunit 5                   | 2 | 1.23 | NA    | NA    |
| P22246 | Splicing factor, proline- and glutamine-rich                                | 5 | 1.23 | 0.082 | 0.063 |
| Q73355 | Mannose-6-phosphate utilization defect 1 protein                            | 4 | 1.23 | NA    | NA    |
| Q8N163 | Cell cycle and apoptosis regulator protein 2                                | 1 | 1.23 | NA    | NA    |
| Q547E7 | Nodal modulator 2                                                           | 1 | 1.23 | NA    | NA    |
| P40785 | 40S ribosomal protein S5                                                    | 2 | 1.23 | NA    | NA    |
| Q00700 | HLA class I histocompatibility antigen, Cw-15 alpha chain                   | 1 | 1.23 | NA    | NA    |
| P58012 | U1 small nuclear ribonucleoprotein A                                        | 3 | 1.23 | 0.043 | 0.041 |
| Q9P016 | Thymocyte nuclear protein 1                                                 | 1 | 1.23 | NA    | NA    |
| P04179 | Superoxide dismutase [Mn], mitochondrial                                    | 5 | 1.23 | 0.212 | 0.392 |
| P46779 | 60S ribosomal protein L28                                                   | 2 | 1.22 | 0.044 | 0.045 |
| Q94874 | E3 UFM1 protein ligase 1                                                    | 2 | 1.22 | NA    | NA    |
| P61586 | Transforming protein RhoA                                                   | 1 | 1.22 | NA    | NA    |
| Q96102 | Heterogeneous nuclear ribonucleoprotein U-like protein 1                    | 2 | 1.22 | NA    | NA    |
| Q92556 | Engulfment and cell motility protein 1                                      | 1 | 1.22 | NA    | NA    |
| Q15144 | Actin-related protein 2/3 complex subunit 2                                 | 5 | 1.22 | 0.159 | 0.221 |
| Q95168 | NADH dehydrogenase (ubiquinone) 1 beta subcomplex subunit 4                 | 1 | 1.22 | NA    | NA    |
| Q12874 | Splicing factor 3A subunit 3                                                | 1 | 1.22 | NA    | NA    |
| P11844 | Probable ATP-dependent RNA helicase DDX5                                    | 4 | 1.22 | 0.028 | 0.006 |
| Q04037 | Eukaryotic translation initiation factor 4 gamma 1                          | 4 | 1.22 | NA    | NA    |
| P39023 | 60S ribosomal protein L3                                                    | 5 | 1.22 | 0.052 | 0.019 |
| P26368 | Splicing factor U2AF 65 kDa subunit                                         | 3 | 1.22 | 0.095 | 0.175 |
| Q49591 | Serine--RNA ligase, cytoplasmic                                             | 5 | 1.22 | 0.068 | 0.046 |
| P26040 | Valine--RNA ligase                                                          | 3 | 1.22 | 0.038 | 0.035 |
| Q97294 | Dehydrogenase/oxidoreductase SDR family member 7                            | 2 | 1.21 | NA    | NA    |
| Q15365 | Poly(C) binding protein 1                                                   | 4 | 1.21 | 0.123 | 0.214 |
| P08417 | Dihydropyridine reductase                                                   | 2 | 1.21 | NA    | NA    |
| P28447 | Antioxidant protein A1                                                      | 5 | 1.21 | 0.287 | 0.538 |
| P60886 | 40S ribosomal protein S20                                                   | 5 | 1.21 | 0.096 | 0.116 |
| P14688 | Aspartate--RNA ligase, cytoplasmic                                          | 5 | 1.21 | 0.086 | 0.090 |
| Q10511 | DNA damage-binding protein 1                                                | 1 | 1.21 | 0.102 | 0.158 |
| P20810 | Calpastatin                                                                 | 2 | 1.21 | NA    | NA    |
| P63000 | Ras-related C3 botulinum toxin substrate 1                                  | 1 | 1.21 | 0.119 | 0.203 |
| Q9BTX2 | Acyl-coenzyme A thioesterase 1                                              | 1 | 1.21 | NA    | NA    |
| P53618 | Coasterin subunit beta                                                      | 4 | 1.21 | 0.082 | 0.056 |
| Q42143 | Putative pre-mRNA-splicing factor ATP-dependent RNA helicase DHX15          | 1 | 1.21 | NA    | NA    |
| Q9Y266 | Nuclear migration protein nudC                                              | 1 | 1.21 | NA    | NA    |
| Q00151 | POZ and LIM domain protein 1                                                | 1 | 1.21 | NA    | NA    |
| P11216 | Glycogen phosphorylase, brain form                                          | 5 | 1.20 | 0.159 | 0.163 |
| P11717 | Calcium-independent mannose-6-phosphate receptor                            | 1 | 1.20 | NA    | NA    |
| P30049 | ATP synthase subunit delta, mitochondrial                                   | 5 | 1.20 | 0.111 | 0.170 |
| A11070 | Aminoacetate synthase-like protein                                          | 3 | 1.20 | 0.080 | 0.148 |
| P50454 | Serin H1                                                                    | 5 | 1.20 | 0.160 | 0.318 |
| P46778 | 60S ribosomal protein L21                                                   | 3 | 1.20 | 0.089 | 0.178 |
| P20478 | Beta-lactamase-like protein 2                                               | 1 | 1.20 | NA    | NA    |
| Q75387 | Core histone macro-H2A.1                                                    | 5 | 1.20 | 0.036 | 0.008 |
| Q75599 | Heterotrimeric guanine-nucleotide-binding protein kinase activator A        | 1 | 1.20 | NA    | NA    |
| Q13217 | DnaJ homolog subfamily C member 5                                           | 2 | 1.20 | NA    | NA    |
| P39019 | 40S ribosomal protein S19                                                   | 5 | 1.19 | 0.222 | 0.488 |
| Q26262 | Antioxidant protein A1                                                      | 5 | 1.19 | 0.394 | 0.678 |
| Q49189 | 4-(methylaminobutyl)aldehyde dehydrogenase                                  | 5 | 1.19 | 0.141 | 0.280 |
| Q00231 | 26S proteasome non-ATPase regulatory subunit 11                             | 5 | 1.19 | 0.064 | 0.052 |
| P39200 | Ras-related protein Rab-1A                                                  | 4 | 1.19 | NA    | NA    |
| Q9NSD9 | Phenylalanine--RNA ligase beta subunit                                      | 3 | 1.19 | 0.089 | 0.128 |
| Q96KQ7 | Fumarylacetoacetate hydrolase domain-containing protein 2A                  | 2 | 1.19 | NA    | NA    |
| Q13162 | Peroxiredoxin-4                                                             | 4 | 1.19 | 0.130 | 0.280 |
| Q96044 | Ras-related protein Rab-1B                                                  | 1 | 1.19 | NA    | NA    |
| Q15143 | Actin-related protein 2/3 complex subunit 1B                                | 4 | 1.19 | 0.149 | 0.334 |
| B0NE19 | Eukaryotic translation initiation factor 3 subunit C-like protein           | 5 | 1.19 | 0.041 | 0.015 |
| Q9Y224 | UPF0568 protein C14orf166                                                   | 1 | 1.19 | NA    | NA    |
| Q41619 | Cytochrome b5-like B                                                        | 1 | 1.19 | NA    | NA    |
| Q8TAQ2 | SWI5NF complex subunit SMARCC2                                              | 2 | 1.18 | NA    | NA    |
| P62714 | Serine/threonine-protein phosphatase 2A catalytic subunit beta isoform      | 1 | 1.18 | NA    | NA    |
| Q87879 | Minor histocompatibility antigen H13                                        | 1 | 1.18 | NA    | NA    |
| P21266 | Guthathione S-transferase Mu 3                                              | 4 | 1.18 | 0.152 | 0.354 |
| Q00766 | H1 domain-containing, RNA-binding, signal transduction-associated protein 1 | 4 | 1.18 | 0.065 | 0.065 |
| P62913 | 60S ribosomal protein L11                                                   | 5 | 1.18 | 0.021 | 0.001 |
| P31153 | S-adenosylmethionine synthase isoform type-2                                | 4 | 1.18 | 0.205 | 0.482 |
| DU6D00 | Vacuolar protein sorting-associated protein 29                              | 2 | 1.18 | NA    | NA    |
| P22695 | Cytochrome bc1 complex subunit 2, mitochondrial                             | 5 | 1.18 | 0.158 | 0.364 |
| P62910 | 60S ribosomal protein L32                                                   | 1 | 1.17 | NA    | NA    |
| P11586 | C-1-tetrahydrofolate synthase, cytoplasmic                                  | 4 | 1.17 | 0.085 | 0.158 |
| P61353 | 60S ribosomal protein L27                                                   | 4 | 1.17 | 0.116 | 0.262 |
| P52097 | F-actin-capping protein subunit alpha-1                                     | 4 | 1.17 | 0.181 | 0.396 |
| Q92298 | NADH dehydrogenase (ubiquinone) 1 subunit C2                                | 2 | 1.17 | NA    | NA    |
| P17980 | 26S protease regulatory subunit 8A                                          | 2 | 1.17 | NA    | NA    |
| P55145 | Mesencephalic astrocyte-derived neurotrophic factor                         | 3 | 1.17 | 0.108 | 0.281 |
| P61160 | Actin-related protein 2                                                     | 2 | 1.17 | 0.128 | 0.282 |
| Q75844 | CAAX prenyl protease 1 homolog                                              | 1 | 1.17 | NA    | NA    |
| P28161 | Guthathione S-transferase Mu 2                                              | 2 | 1.17 | NA    | NA    |
| P31195 | Ras-related protein Rab-14                                                  | 1 | 1.17 | NA    | NA    |
| Q9NR28 | Dialdo homolog, mitochondrial                                               | 3 | 1.16 | 0.108 | 0.291 |
| P36219 | Heme oxygenase 2                                                            | 4 | 1.16 | 0.086 | 0.108 |
| Q69526 | Arsenite A4                                                                 | 5 | 1.16 | 0.103 | 0.221 |
| Q13151 | Heterogeneous nuclear ribonucleoprotein A0                                  | 5 | 1.16 | 0.113 | 0.257 |
| Q90730 | Eukaryotic translation initiation factor 2E                                 | 1 | 1.16 | NA    | NA    |
| P66578 | 60S ribosomal protein L4                                                    | 5 | 1.16 | 0.101 | 0.225 |
| Q8M9K1 | CGC5H iron-sulfur domain-containing protein 2                               | 5 | 1.16 | 0.057 | 0.064 |
| P06576 | ATP synthase subunit beta, mitochondrial                                    | 4 | 1.15 | 0.105 | 0.254 |
| Q15212 | Prefoldin subunit 6                                                         | 2 | 1.15 | NA    | NA    |
| Q9L3U8 | Drebrin-like protein                                                        | 1 | 1.15 | NA    | NA    |
| P62318 | Small nuclear ribonucleoprotein Sm D3                                       | 4 | 1.15 | 0.069 | 0.100 |
| Q49755 | Transmembrane emp24 domain-containing protein 10                            | 5 | 1.15 | 0.040 | 0.026 |
| D9M242 | H1ACA ribonucleoprotein domain subunit 2                                    | 2 | 1.15 | NA    | NA    |
| P23492 | Mitogen-activated protein kinase 1                                          | 1 | 1.15 | NA    | NA    |
| Q15393 | Splicing factor 3B subunit 3                                                | 2 | 1.15 | NA    | NA    |
| P11524 | 60S ribosomal protein L7                                                    | 5 | 1.14 | 0.028 | 0.059 |
| Q68P62 | RNA-binding protein 14                                                      | 1 | 1.14 | NA    | NA    |
| P26373 | 60S ribosomal protein L13                                                   | 5 | 1.14 | 0.175 | 0.488 |
| P01008 | Alpha-1-antitrypsin                                                         | 5 | 1.14 | 0.248 | 0.619 |
| P45880 | Voltage-dependent anion-selective channel protein 2                         | 5 | 1.14 | 0.228 | 0.590 |
| Q60568 | Procollagen lysine 2-oxoglutarate 5-dioxygenase 3                           | 1 | 1.14 | NA    | NA    |
| Q10894 | Protein disulfide-isomerase A6                                              | 4 | 1.14 | 0.124 | 0.361 |
| Q92599 | Septin-8                                                                    | 1 | 1.13 | NA    | NA    |
| Q860P2 | Kinecin                                                                     | 5 | 1.13 | 0.050 | 0.071 |
| P50740 | Leukocyte elastase inhibitor                                                | 2 | 1.13 | NA    | NA    |
| P12181 | V-type proton ATPase subunit B, brain isoform                               | 5 | 1.13 | 0.129 | 0.405 |
| P61158 | Actin-related protein 3                                                     | 5 | 1.13 | 0.188 | 0.322 |
| Q92622 | Vesicle-associated membrane protein-associated protein BC                   | 5 | 1.12 | 0.083 | 0.235 |
| P27824 | Calnexin                                                                    | 5 | 1.12 | 0.034 | 0.027 |
| Q43390 | Heterogeneous nuclear ribonucleoprotein R                                   | 5 | 1.12 | 0.162 | 0.516 |
| Q95881 | Thioredoxin domain-containing protein 12                                    | 4 | 1.12 | 0.129 | 0.440 |
| Q9N208 | Endoplasmic reticulum aminopeptidase 1                                      | 5 | 1.12 | 0.131 | 0.438 |
| Q92788 | Lactoferrin                                                                 | 1 | 1.12 | NA    | NA    |
| Q9Y262 | Eukaryotic translation initiation factor 3 subunit L                        | 3 | 1.12 | 0.027 | 0.055 |
| P64244 | 60S ribosomal protein L7a                                                   | 5 | 1.12 | 0.128 | 0.429 |
| P61264 | 60S ribosomal protein L26                                                   | 1 | 1.12 | NA    | NA    |
| Q06830 | Peroxiredoxin-1                                                             | 5 | 1.12 | 0.299 | 0.629 |
| P10140 | Succinate dehydrogenase [ubiquinone] [iron-protein] subunit, mitochondrial  | 5 | 1.12 | 0.088 | 0.265 |
| P00205 | Aspartate aminotransferase, mitochondrial                                   | 4 | 1.11 | 0.163 | 0.556 |
| P11310 | Medium-chain specific acyl-CoA dehydrogenase, mitochondrial                 | 4 | 1.11 | 0.166 | 0.562 |
| P56225 | Sulfatransferase 1A1                                                        | 1 | 1.11 | NA    | NA    |
| P11940 | Polydiphosphate binding protein                                             | 5 | 1.11 | 0.029 | 0.021 |
| P46777 | 60S ribosomal protein L5                                                    | 5 | 1.11 | 0.057 | 0.142 |
| Q9LJ21 | Slimstatin-like protein 2, mitochondrial                                    | 3 | 1.11 | 0.102 | 0.409 |
| Q14165 | Malexin                                                                     | 5 | 1.11 | 0.099 | 0.356 |
| P01911 | HLA class II histocompatibility antigen, DRB1-15 beta chain                 | 3 | 1.11 | NA    | NA    |
| Q9L8V1 | Sorting nexin-8                                                             | 1 | 1.11 | 0.084 | 0.366 |
| P43686 | 26S protease regulatory subunit 8B                                          | 1 | 1.11 | 0.107 | 0.450 |
| P56878 | Histone H2B type 1-D                                                        | 2 | 1.10 | NA    | NA    |
| Q96142 | Polydiphosphate-binding protein 2                                           | 1 | 1.10 | 0.041 | 0.140 |
| Q9UM5A | Pre-mRNA-processing factor 19                                               | 1 | 1.10 | NA    | NA    |
| P01903 | HLA class II histocompatibility antigen, DR alpha chain                     | 5 | 1.10 | 0.251 | 0.667 |
| E9P300 | Nascent polypeptide-associated complex subunit alpha, muscle-specific form  | 3 | 1.10 | 0.582 | 0.886 |
| Q9H020 | Manganese-transporting ATPase 13A1                                          | 3 | 1.10 | 0.228 | 0.721 |
| Q75643 | US small nuclear ribonucleoprotein 200 kDa helicase                         | 5 | 1.09 | 0.044 | 0.111 |
| Q02878 | 60S ribosomal protein L6                                                    | 5 | 1.09 | 0.104 | 0.438 |
| Q76003 | Gutaredoxin-3                                                               | 1 | 1.09 | NA    | NA    |
| P62909 | 26S ribosomal protein S36, mitochondrial                                    | 4 | 1.09 | 0.070 | 0.265 |
| Q02978 | Mitochondrial 2-oxoglutarate/malate carrier protein                         | 2 | 1.09 | NA    | NA    |
| P22396 | 40S ribosomal protein S3                                                    | 5 | 1.09 | 0.034 | 0.066 |
| Q14745 | Na(+)/H(+) exchange regulatory cofactor NHE-RF1                             | 1 | 1.09 | NA    | NA    |
| P18859 | ATP synthase-coupling factor 6, mitochondrial                               | 4 | 1.09 | 0.093 | 0.432 |
| Q15435 | Protein phosphatase 1 regulatory subunit 7                                  | 1 | 1.09 | NA    | NA    |
| Q75366 | Vesicle-trafficking protein SEC22D                                          | 5 | 1.09 | 0.165 | 0.664 |
| Q8UXK7 | Adipocyte enhancer-binding protein 1                                        | 3 | 1.09 | 0.278 | 0.795 |
| P22207 | Non-specific lipid-transfer protein                                         | 1 | 1.08 | NA    | NA    |
| P22269 | 40S ribosomal protein S19                                                   | 5 | 1.08 | 0.075 | 0.342 |
| Q00487 | 26S proteasome non-ATPase regulatory subunit 14                             | 1 | 1.08 | NA    | NA    |
| Q964E4 | Fur upstream element-binding protein 1                                      | 1 | 1.08 | 0.084 | 0.438 |
| P14314 | Glucosylase 2 subunit beta                                                  | 5 | 1.08 | 0.118 | 0.534 |
| P61581 | 14-3-3 protein gamma                                                        | 2 | 1.08 | NA    | NA    |
| Q75847 | ATP synthase subunit c1, mitochondrial                                      | 5 | 1.08 | 0.069 | 0.324 |
| P68871 | Hemoglobin subunit beta                                                     | 5 | 1.08 | 0.439 | 0.869 |
| P08134 | Pro-related GTP-binding protein Rhoc                                        | 4 | 1.08 | 0.098 | 0.493 |
| P11387 | DNA topoisomerase 1                                                         | 1 | 1.08 | NA    | NA    |
| P22368 | NAD-dependent malic enzyme, mitochondrial                                   | 1 | 1.08 | NA    | NA    |

Table S16-Average Metastatic Tumors

|        |                                                                                                              |      |      |       |       |
|--------|--------------------------------------------------------------------------------------------------------------|------|------|-------|-------|
| P30048 | Thioredoxin-dependent peroxide reductase, mitochondrial                                                      | 5    | 1.08 | 0.194 | 0.726 |
| P30041 | Proteindisin-6                                                                                               | 1.08 | 1.08 | 0.069 | 0.287 |
| P22061 | Protein-L-isopartate(O-aspartate) O-methyltransferase                                                        | 1    | 1.07 | NA    | NA    |
| O6626  | Endoplasmic reticulum resident protein 44                                                                    | 5    | 1.07 | 0.172 | 0.705 |
| P80303 | Nucleobindin-2                                                                                               | 1    | 1.07 | NA    | NA    |
| P54727 | UV excision repair protein RAD23 homolog B                                                                   | 4    | 1.07 | 0.092 | 0.509 |
| O9Y1E1 | Hepatitis-derived growth factor-related protein 3                                                            | 1    | 1.07 | NA    | NA    |
| O8H5T7 | Parkinson disease 7 domain-containing protein 1                                                              | 1    | 1.07 | NA    | NA    |
| POC505 | Ig lambda-2 chain C regions                                                                                  | 5    | 1.07 | 0.328 | 0.846 |
| P90237 | ATP-dependent 6-phosphofructokinase, muscle type                                                             | 5    | 1.07 | 0.168 | 0.706 |
| Q2U4N6 | 26S proteasome non-ATPase regulatory subunit 13                                                              | 2    | 1.07 | NA    | NA    |
| P62280 | 40S ribosomal protein S11                                                                                    | 5    | 1.07 | 0.134 | 0.646 |
| P69505 | Hemoglobin subunit alpha                                                                                     | 5    | 1.07 | 0.438 | 0.888 |
| Q13596 | Sorting nexin-1                                                                                              | 1    | 1.07 | 0.106 | 0.606 |
| Q92841 | Probable ATP-dependent RNA helicase DDX17                                                                    | 5    | 1.06 | 0.000 | 0.354 |
| Q8U1K1 | Chondrin sulfate proteoglycan 4                                                                              | 1    | 1.06 | 0.023 | 0.076 |
| P05198 | Eukaryotic translation initiation factor 2 subunit 1                                                         | 3    | 1.06 | 0.093 | 0.583 |
| Q16401 | 26S proteasome non-ATPase regulatory subunit 5                                                               | 1    | 1.06 | NA    | NA    |
| P55684 | Eukaryotic translation initiation factor 3 subunit B                                                         | 4    | 1.06 | 0.168 | 0.640 |
| P38117 | Electron transfer flavoprotein subunit beta                                                                  | 5    | 1.06 | 0.092 | 0.576 |
| O9YJ38 | 60S ribosomal protein L36                                                                                    | 4    | 1.06 | 0.049 | 0.337 |
| P18896 | 40S ribosomal protein S2                                                                                     | 5    | 1.06 | 0.053 | 0.362 |
| Q02543 | 60S ribosomal protein L18a                                                                                   | 4    | 1.05 | 0.078 | 0.548 |
| P62814 | 60S ribosomal protein L14                                                                                    | 5    | 1.05 | 0.085 | 0.579 |
| P03038 | Melexin                                                                                                      | 5    | 1.05 | 0.131 | 0.717 |
| Q16891 | Mitochondrial inner membrane protein                                                                         | 5    | 1.05 | 0.105 | 0.661 |
| Q55353 | Heterochromatin protein 1-binding protein 3                                                                  | 5    | 1.05 | 0.149 | 0.655 |
| P32988 | 26S protease regulatory subunit 5                                                                            | 5    | 1.05 | 0.090 | 0.610 |
| Q8N1G4 | Leucine-rich repeat-containing protein 47                                                                    | 4    | 1.05 | 0.101 | 0.661 |
| P63208 | S-phase kinase-associated protein 1                                                                          | 1    | 1.05 | NA    | NA    |
| Q658Y4 | Protein FAM81A1                                                                                              | 1    | 1.05 | NA    | NA    |
| Q12342 | Serine/arginine-rich splicing factor 9                                                                       | 1    | 1.05 | NA    | NA    |
| P28331 | NADH-ubiquinone oxidoreductase 75 kDa subunit, mitochondrial                                                 | 3    | 1.05 | 0.081 | 0.632 |
| P19190 | Cytochrome b-c1 complex subunit 1, mitochondrial                                                             | 5    | 1.05 | 0.149 | 0.781 |
| Q10591 | Microtubule-associated protein RP/EB family member 1                                                         | 5    | 1.04 | 0.112 | 0.722 |
| P62763 | 40S ribosomal protein S6                                                                                     | 4    | 1.04 | 0.060 | 0.505 |
| PO1023 | Alpha-2-macroglobulin                                                                                        | 5    | 1.04 | 0.232 | 0.861 |
| Q14157 | Ubiquitin-associated protein 2-like                                                                          | 1    | 1.04 | NA    | NA    |
| P62317 | 60S ribosomal protein L8                                                                                     | 4    | 1.04 | 0.169 | 0.818 |
| P52705 | ATP synthase subunit alpha, mitochondrial                                                                    | 5    | 1.04 | 0.076 | 0.609 |
| P11021 | 7S kDa glucose-regulated protein                                                                             | 5    | 1.04 | 0.074 | 0.617 |
| P20700 | Lamin B1                                                                                                     | 5    | 1.04 | 0.055 | 0.509 |
| P11177 | Pyruvate dehydrogenase E1 component subunit beta, mitochondrial                                              | 5    | 1.04 | 0.088 | 0.595 |
| O42424 | 26S proteasome non-ATPase regulatory subunit 3                                                               | 5    | 1.04 | 0.093 | 0.596 |
| A10515 | Dihydropyridine-residue acetyltransferase component of pyruvate dehydrogenase complex, mitochondrial         | 4    | 1.04 | 0.112 | 0.760 |
| P01676 | Ig alpha-1 chain C region                                                                                    | 3    | 1.04 | 0.628 | 0.958 |
| P44456 | Vesicle-fusing ATPase                                                                                        | 3    | 1.04 | 0.165 | 0.849 |
| P27797 | Calreticulin                                                                                                 | 5    | 1.03 | 0.155 | 0.837 |
| Q14890 | Erp97-1                                                                                                      | 2    | 1.03 | NA    | NA    |
| P19371 | T-complex protein 1 subunit beta                                                                             | 5    | 1.03 | 0.070 | 0.609 |
| Q9H5E4 | Isolecithin-3-phosphatase, mitochondrial                                                                     | 5    | 1.03 | 0.054 | 0.575 |
| P21912 | Succinate dehydrogenase (ubiquinone) iron-sulfur subunit, mitochondrial                                      | 5    | 1.03 | 0.150 | 0.803 |
| P64242 | ATP synthase subunit gamma, mitochondrial                                                                    | 4    | 1.03 | 0.075 | 0.709 |
| P46327 | Fatty acid synthase                                                                                          | 2    | 1.03 | NA    | NA    |
| P05107 | Integrin beta-2                                                                                              | 3    | 1.03 | 0.245 | 0.959 |
| P55795 | Heterogeneous nuclear ribonucleoprotein H2                                                                   | 1    | 1.03 | NA    | NA    |
| Q14697 | Neutral alpha-glucosidase AB                                                                                 | 5    | 1.03 | 0.108 | 0.818 |
| P19311 | Ezrin                                                                                                        | 5    | 1.03 | 0.153 | 0.879 |
| P84098 | 60S ribosomal protein L19                                                                                    | 1    | 1.02 | NA    | NA    |
| Q00303 | Eukaryotic translation initiation factor 3 subunit F                                                         | 3    | 1.02 | 0.183 | 0.917 |
| P19373 | Cytochrome c oxidase subunit 4 isozyme 1, mitochondrial                                                      | 5    | 1.02 | 0.130 | 0.658 |
| Q13011 | Delta(3,5)-Delta(2,4)-dienoyl-CoA isomerase, mitochondrial                                                   | 5    | 1.02 | 0.060 | 0.742 |
| Q62664 | Feritin-3                                                                                                    | 1    | 1.02 | NA    | NA    |
| P61026 | Rar-related protein Rab-10                                                                                   | 5    | 1.02 | 0.115 | 0.888 |
| Q8K1X2 | Cell division cycle and apoptosis regulator protein 1                                                        | 1    | 1.02 | NA    | NA    |
| Q8YV03 | Dehydrogenase-CoA heme domain-containing protein                                                             | 1    | 1.02 | NA    | NA    |
| P32969 | 60S ribosomal protein L9                                                                                     | 5    | 1.01 | 0.054 | 0.823 |
| Q10505 | Signal peptidase complex subunit 2                                                                           | 5    | 1.01 | NA    | NA    |
| P29874 | Cytochrome c oxidase subunit 6a, mitochondrial                                                               | 4    | 1.01 | 0.124 | 0.652 |
| Q12907 | Vesicular integral-membrane protein VPS36                                                                    | 1    | 1.01 | NA    | NA    |
| P46781 | 40S ribosomal protein S9                                                                                     | 5    | 1.01 | 0.043 | 0.837 |
| Q83878 | CagA subfamily A member 3                                                                                    | 1    | 1.01 | NA    | NA    |
| P84103 | Serine/arginine-rich splicing factor 3                                                                       | 4    | 1.01 | 0.168 | 0.968 |
| O43637 | Isooctate dehydrogenase (NAD) subunit beta, mitochondrial                                                    | 2    | 1.01 | NA    | NA    |
| Q61477 | GTP-AMF phosphotransferase AK5, mitochondrial                                                                | 1    | 1.01 | 0.045 | 0.696 |
| Q15008 | 26S proteasome non-ATPase regulatory subunit 6                                                               | 2    | 1.00 | NA    | NA    |
| Q10124 | Allosteric phosphoprotein PEA-15                                                                             | 2    | 1.00 | NA    | NA    |
| Q00325 | Phospholipase carrier protein, mitochondrial                                                                 | 5    | 1.00 | 0.090 | 0.578 |
| Q72827 | E3 ubiquitin-protein ligase HUWE1                                                                            | 2    | 1.00 | NA    | NA    |
| P39597 | Dihydropyridine-residue succinyltransferase component of 2-oxoglutarate dehydrogenase complex, mitochondrial | 1    | 1.00 | 0.042 | 0.661 |
| P52943 | Cysteine-rich protein 2                                                                                      | 1    | 1.00 | NA    | NA    |
| Q75489 | NADH dehydrogenase (ubiquinone) iron-sulfur protein 3, mitochondrial                                         | 5    | 1.00 | 0.128 | 0.971 |
| P11443 | 5,6-dihydroxyindole-2-carboxylic acid oxidase                                                                | 5    | 1.00 | 0.488 | 0.961 |
| Q01085 | Nucleosylin TIAR                                                                                             | 1    | 0.99 | NA    | NA    |
| P78734 | Eukaryotic translation initiation factor 4 gamma 2                                                           | 1    | 0.99 | NA    | NA    |
| Q9Q129 | Pyridoxase-2 phosphate oxidase                                                                               | 3    | 0.99 | NA    | NA    |
| Q01844 | RNA-binding protein EWS                                                                                      | 3    | 0.99 | 0.235 | 0.965 |
| Q9Y168 | NADH dehydrogenase (ubiquinone) beta subcomplex subunit 9                                                    | 3    | 0.99 | 0.270 | 0.965 |
| Q9Q1K1 | Nuclear protein sorting associated protein 35                                                                | 4    | 0.99 | 0.083 | 0.873 |
| Q13310 | Polysialyltransferase 4                                                                                      | 1    | 0.98 | NA    | NA    |
| P15608 | Cytochrome c oxidase subunit 5B, mitochondrial                                                               | 5    | 0.98 | 0.141 | 0.913 |
| P27708 | CAD protein                                                                                                  | 3    | 0.98 | 0.182 | 0.929 |
| P46977 | Dolichyl-diphosphooligosaccharide-protein glycosyltransferase subunit STT3A                                  | 2    | 0.98 | NA    | NA    |
| Q00203 | AP-3 complex subunit beta-1                                                                                  | 3    | 0.98 | 0.168 | 0.864 |
| P55084 | Trifunctional enzyme subunit beta, mitochondrial                                                             | 5    | 0.98 | 0.103 | 0.843 |
| P06559 | Pyruvate dehydrogenase E1 component subunit alpha, somatic form, mitochondrial                               | 2    | 0.98 | NA    | NA    |
| P06991 | T-complex protein 1 subunit delta                                                                            | 4    | 0.97 | 0.017 | 0.298 |
| P31688 | DnaJ homolog subfamily A member 1                                                                            | 3    | 0.97 | 0.176 | 0.895 |
| P26359 | ATP synthase F0) complex subunit B1, mitochondrial                                                           | 3    | 0.97 | 0.016 | 0.211 |
| Q15511 | Actin-related protein 2/3 complex subunit 5                                                                  | 3    | 0.97 | 0.200 | 0.899 |
| Q15293 | Reticulocalbin-1                                                                                             | 5    | 0.97 | 0.143 | 0.829 |
| Q86P35 | Actin-related protein 2/3 complex subunit 5-like protein                                                     | 5    | 0.97 | NA    | NA    |
| PO1800 | Ig gamma-3 chain C region                                                                                    | 4    | 0.97 | 0.174 | 0.860 |
| P48643 | T-complex protein 1 subunit epsilon                                                                          | 5    | 0.97 | 0.073 | 0.667 |
| P62701 | 40S ribosomal protein S4, X isoform                                                                          | 5    | 0.97 | 0.082 | 0.616 |
| P35606 | Coatomer subunit beta'                                                                                       | 1    | 0.97 | NA    | NA    |
| Q7L5N1 | COP9 signalosome complex subunit 6                                                                           | 5    | 0.96 | 0.101 | 0.730 |
| Q14256 | E3 ubiquitin(SG2) ligase TRIM25                                                                              | 3    | 0.96 | 0.108 | 0.754 |
| P62277 | 40S ribosomal protein S13                                                                                    | 5    | 0.96 | 0.071 | 0.608 |
| P42768 | 60S ribosomal protein L35                                                                                    | 1    | 0.96 | NA    | NA    |
| Q02216 | 2-oxoglutarate dehydrogenase, mitochondrial                                                                  | 1    | 0.96 | 0.107 | 0.718 |
| Q12000 | 26S proteasome non-ATPase regulatory subunit 2                                                               | 5    | 0.96 | 0.130 | 0.762 |
| P69603 | 60S ribosomal protein L25a                                                                                   | 2    | 0.96 | NA    | NA    |
| P69603 | Cell division control protein 42 homolog                                                                     | 2    | 0.96 | NA    | NA    |
| O9Y512 | Sorting and assembly machinery component 50 homolog                                                          | 2    | 0.96 | NA    | NA    |
| P48735 | Isooctate dehydrogenase (NAD), mitochondrial                                                                 | 4    | 0.95 | 0.155 | 0.758 |
| P11279 | Lysosome-associated membrane glycoprotein 1                                                                  | 3    | 0.96 | 0.490 | 0.935 |
| PO1834 | Ig kappa chain C region                                                                                      | 5    | 0.96 | 0.326 | 0.896 |
| Q15751 | Cytosolic FMR1-interacting protein 1                                                                         | 1    | 0.96 | NA    | NA    |
| Q75165 | DnaJ homolog subfamily C member 13                                                                           | 2    | 0.95 | NA    | NA    |
| P35013 | Basn3in                                                                                                      | 3    | 0.95 | 0.300 | 0.890 |
| P40227 | T-complex protein 1 subunit zeta                                                                             | 5    | 0.95 | 0.069 | 0.527 |
| P48411 | Elongation factor Tu, mitochondrial                                                                          | 5    | 0.95 | 0.243 | 0.853 |
| Q68A48 | Regulator complex protein LAMTOR1                                                                            | 1    | 0.95 | NA    | NA    |
| Q8H859 | Thioredoxin domain-containing protein 5                                                                      | 5    | 0.95 | 0.129 | 0.724 |
| Q42858 | Huntingtin                                                                                                   | 1    | 0.95 | NA    | NA    |
| Q11177 | Serine/threonine-protein kinase PKM 2                                                                        | 1    | 0.95 | NA    | NA    |
| Q8N2H3 | Probable aminopeptidase NPEPL1                                                                               | 1    | 0.95 | NA    | NA    |
| Q14847 | LIM and SH3 domain protein 1                                                                                 | 3    | 0.95 | 0.164 | 0.778 |
| P16403 | Histone H1.2                                                                                                 | 2    | 0.95 | NA    | NA    |
| Q52973 | Transportin-1                                                                                                | 2    | 0.95 | NA    | NA    |
| P14627 | Cytochrome b-c1 complex subunit 7                                                                            | 4    | 0.95 | 0.097 | 0.604 |
| Q00202 | 26S proteasome non-ATPase regulatory subunit 12                                                              | 4    | 0.95 | NA    | NA    |
| Q96653 | Calneum B homologous protein 1                                                                               | 2    | 0.95 | NA    | NA    |
| P39656 | Dolichyl-diphosphooligosaccharide-protein glycosyltransferase 48 kDa subunit                                 | 5    | 0.94 | 0.093 | 0.551 |
| Q96479 | CDH9/PCP2, endoplasmic bifunctional protein                                                                  | 1    | 0.94 | NA    | NA    |
| Q02996 | GoII apparatus protein 1                                                                                     | 2    | 0.94 | NA    | NA    |
| Q62524 | Feruloyltransferase element-binding protein 3                                                                | 2    | 0.94 | NA    | NA    |
| P49748 | Very long-chain specific acyl-CoA dehydrogenase, mitochondrial                                               | 4    | 0.94 | 0.104 | 0.566 |
| Q60262 | Guanine nucleotide-binding protein G(I)/G(S)/G(O) subunit gamma-7                                            | 1    | 0.93 | NA    | NA    |
| Q60749 | Sorting nexin-2                                                                                              | 2    | 0.93 | NA    | NA    |
| Q14980 | Nuclear mitotic apparatus protein 1                                                                          | 5    | 0.93 | 0.023 | 0.039 |
| O9Y4L1 | Hypoxia up-regulated protein 1                                                                               | 5    | 0.93 | 0.148 | 0.865 |
| P28198 | Probable ATP-dependent RNA helicase DDX8                                                                     | 4    | 0.93 | 0.053 | 0.268 |
| P62987 | Ubiquitin-60S ribosomal protein L40                                                                          | 3    | 0.93 | 0.382 | 0.869 |
| P35573 | Clyocyan debranching enzyme                                                                                  | 1    | 0.93 | NA    | NA    |
| P47756 | F-actin-capping protein subunit beta                                                                         | 5    | 0.93 | 0.088 | 0.453 |
| Q15173 | Membrane-associated progesterone receptor component 2                                                        | 4    | 0.93 | 0.117 | 0.566 |
| Q52997 | Protein NGRG1                                                                                                | 3    | 0.93 | 0.128 | 0.610 |
| Q75964 | ATP synthase subunit c, mitochondrial                                                                        | 3    | 0.93 | 0.073 | 0.345 |
| P61758 | Prefoldin subunit 3                                                                                          | 1    | 0.92 | NA    | NA    |
| P11667 | Protein disulfide isomerase A4                                                                               | 5    | 0.92 | 0.155 | 0.569 |
| Q02499 | ATP-dependent RNA helicase DDX1                                                                              | 4    | 0.92 | 0.127 | 0.544 |
| P29119 | Thymidylate kinase                                                                                           | 1    | 0.92 | NA    | NA    |
| Q8U4H9 | NADH-cytochrome b5 reductase 1                                                                               | 5    | 0.92 | 0.065 | 0.249 |
| Q43760 | Synaptotagmin-2                                                                                              | 1    | 0.92 | NA    | NA    |
| P56556 | NADH dehydrogenase (ubiquinone) 1 alpha subcomplex subunit 6                                                 | 2    | 0.91 | NA    | NA    |
| Q30208 | Mitochondrial import inner membrane translocase subunit TIM50                                                | 2    | 0.91 | NA    | NA    |
| P14625 | Endoplasmic                                                                                                  | 5    | 0.91 | 0.125 | 0.490 |
| P06703 | Protein S100-A6                                                                                              | 2    | 0.91 | NA    | NA    |
| P48444 | Coatomer subunit delta                                                                                       | 1    | 0.91 | NA    | NA    |
| P48047 | ATP synthase subunit O, mitochondrial                                                                        | 5    | 0.91 | 0.115 | 0.443 |
| P40703 | Signal transducer and activator of transcription 3                                                           | 4    | 0.91 | 0.108 | 0.423 |
| P17931 | Calnexin-3                                                                                                   | 5    | 0.91 | 0.112 | 0.428 |
| P46109 | Cdk-like protein                                                                                             | 1    | 0.90 | NA    | NA    |
| P46939 | Trifunctional enzyme subunit alpha, mitochondrial                                                            | 5    | 0.90 | 0.163 | 0.378 |
| Q15260 | Surfactant protein 4                                                                                         | 1    | 0.90 | NA    | NA    |
| P06228 | Eukaryotic translation initiation factor 3 subunit E                                                         | 1    | 0.90 | NA    | NA    |
| P39226 | Sironin                                                                                                      | 1    | 0.90 | NA    | NA    |
| Q14683 | Structural maintenance of chromosomes protein 1A                                                             | 4    | 0.90 | 0.056 | 0.149 |
| P47985 | Cytochrome b-c1 complex subunit Rieske, mitochondrial                                                        | 3    | 0.89 | 0.066 | 0.233 |
| P61970 | NADH dehydrogenase (ubiquinone) 1 alpha subcomplex subunit 8                                                 | 1    | 0.89 | NA    | NA    |
| P63261 | Actin, cytoplasmic 2                                                                                         | 2    | 0.89 | NA    | NA    |
| Q8P209 | Pre-miRNA-processing-splicing factor 1                                                                       | 3    | 0.89 | 0.087 | 0.315 |
| P64839 | Cytochrome b-24S heavy chain                                                                                 | 1    | 0.89 | NA    | NA    |
| P48388 | T-complex protein 1 subunit gamma                                                                            | 5    | 0.89 | 0.077 | 0.196 |
| P64632 | Calpain small subunit 1                                                                                      | 5    | 0.89 | 0.087 | 0.148 |
| P50960 | T-complex protein 1 subunit theta                                                                            | 5    | 0.89 | 0.081 | 0.216 |
| Q15942 | Zyxin                                                                                                        | 4    | 0.89 | 0.184 | 0.822 |
| Q50350 | V-type proton ATPase 116 kDa subunit a isoform 1                                                             | 5    | 0.89 | 0.142 | 0.443 |
| Q7KZF4 | Sphingomyelinase 2                                                                                           | 5    | 0.89 | 0.058 | 0.106 |
| Q73036 | NADH dehydrogenase (ubiquinone) iron-sulfur protein 2, mitochondrial                                         | 4    | 0.88 | 0.168 | 0.508 |
| Q8U4P9 | Translocation protein SEC23B homolog                                                                         | 1    | 0.88 | NA    | NA    |
| P40429 | 60S ribosomal protein L13a                                                                                   | 5    | 0.88 | 0.132 | 0.384 |
| Q8U454 | DnaJ homolog subfamily B member 11                                                                           | 3    | 0.88 | 0.097 | 0.308 |
| P46891 | Nestin                                                                                                       | 3    | 0.88 | 0.369 | 0.734 |
| Q9P0L0 | Vesicle-associated membrane protein-associated protein A                                                     | 3    | 0.88 | 0.060 | 0.155 |

Table S16-Average Metastatic Tumors

|        |                                                                               |      |       |       |       |
|--------|-------------------------------------------------------------------------------|------|-------|-------|-------|
| Q9Y265 | RuvB-like 1                                                                   | 2    | 0.87  | NA    | NA    |
| Q9P493 | Microtubule-actin cross-linking factor 1, isoforms 1&2/3/5                    | 4    | 0.87  | 0.162 | 0.379 |
| P43304 | Glycerol-3-phosphate dehydrogenase, mitochondrial                             | 5    | 0.87  | 0.162 | 0.447 |
| P06981 | Ribose phosphate pyrophosphokinase 1                                          | 1    | 0.87  | NA    | NA    |
| P47813 | Eukaryotic translation initiation factor 1A, X-chromosomal                    | 1    | 0.87  | NA    | NA    |
| O60763 | General vesicular transport factor p115                                       | 2    | 0.87  | NA    | NA    |
| Q99460 | 26S proteasome non-ATPase regulatory subunit 1                                | 2    | 0.87  | NA    | NA    |
| P01942 | Kinogen-1                                                                     | 3    | 0.87  | 0.574 | 0.629 |
| Q96733 | Nucleosome assembly protein 1-like 4                                          | 4    | 0.86  | 0.102 | 0.240 |
| Q95864 | Protein S100-A13                                                              | 5    | 0.86  | 0.160 | 0.400 |
| O9P030 | NADH dehydrogenase [ubiquinone] 1 alpha subcomplex subunit 13                 | 1    | 0.86  | NA    | NA    |
| P24752 | Acetyl-CoA acetyltransferase, mitochondrial                                   | 5    | 0.86  | 0.089 | 0.158 |
| O15455 | Toll-like receptor 3                                                          | 1    | 0.86  | NA    | NA    |
| P25685 | DnaJ homolog subfamily B member 1                                             | 1    | 0.86  | NA    | NA    |
| P31376 | Kinesin-1 heavy chain                                                         | 1    | 0.86  | NA    | NA    |
| P30153 | Semithionone-protein phosphatase 2A 65 kDa regulatory subunit A alpha isoform | 6    | 0.86  | 0.163 | 0.386 |
| Q96714 | 3-hydroxyacyl-CoA dehydrogenase type-2                                        | 4    | 0.85  | 0.158 | 0.391 |
| O99832 | T-complex protein 1 subunit eta                                               | 5    | 0.85  | 0.114 | 0.236 |
| Q9Y276 | Calcium-binding protein 39                                                    | 1    | 0.85  | NA    | NA    |
| P55072 | Transitional endoplasmic reticulum ATPase                                     | 5    | 0.85  | 0.122 | 0.244 |
| P51788 | H(+)/Cl(-) exchange transporter 7                                             | 1    | 0.84  | NA    | NA    |
| P56020 | Hsc70-interacting protein                                                     | 1    | 0.84  | 0.136 | 0.278 |
| P42765 | 3-keatoyl-CoA thiolase, mitochondrial                                         | 5    | 0.84  | 0.064 | 0.053 |
| P62461 | Collagen alpha-1(I) chain                                                     | 1    | 0.84  | NA    | NA    |
| P11807 | T-complex protein 1 subunit alpha                                             | 5    | 0.84  | 0.179 | 0.380 |
| O16352 | Alpha-interixin                                                               | 1    | 0.84  | NA    | NA    |
| P51053 | Histone H2B type F-S                                                          | 2    | 0.83  | NA    | NA    |
| Q27381 | Inverted form-2                                                               | 0.83 | 0.067 | 0.071 |       |
| P07384 | Calpain-1 catalytic subunit                                                   | 4    | 0.83  | 0.134 | 0.264 |
| Q9P293 | Arkyrin repeat and FYVE domain-containing protein 1                           | 2    | 0.83  | NA    | NA    |
| P08496 | Cathrin light chain A                                                         | 4    | 0.83  | 0.077 | 0.095 |
| P30622 | CAAP-Gly domain-containing linker protein 1                                   | 1    | 0.83  | NA    | NA    |
| Q9Y230 | RuvB-like 2                                                                   | 4    | 0.83  | 0.122 | 0.224 |
| P53621 | Oatomer subunit alpha                                                         | 4    | 0.83  | 0.090 | 0.129 |
| Q9H449 | EH domain-containing protein 1                                                | 3    | 0.83  | 0.197 | 0.440 |
| P56736 | Topomycin alpha-4 chain                                                       | 3    | 0.83  | 0.101 | 0.132 |
| O14108 | Lysosome membrane protein 2                                                   | 5    | 0.83  | 0.188 | 0.365 |
| O43078 | NADH dehydrogenase [ubiquinone] 1 alpha subcomplex subunit 2                  | 1    | 0.82  | NA    | NA    |
| P31943 | Heterogeneous nuclear ribonucleoprotein H                                     | 2    | 0.82  | NA    | NA    |
| P55209 | Nucleosome assembly protein 1-like 1                                          | 3    | 0.82  | 0.141 | 0.301 |
| P51812 | Ribosomal protein S6 kinase alpha-3                                           | 2    | 0.82  | 0.228 | 0.478 |
| P17858 | ATP-dependent 6-phosphofructokinase, liver type                               | 5    | 0.82  | 0.133 | 0.211 |
| O75340 | Programmed cell death protein 6                                               | 2    | 0.82  | NA    | NA    |
| O62614 | Apoptoprotein O-like                                                          | 1    | 0.82  | NA    | NA    |
| O5ULAO | Aspartyl aminopeptidase                                                       | 2    | 0.82  | NA    | NA    |
| O6UNF0 | Protein kinase C and casein kinase substrate in neurons protein 2             | 1    | 0.82  | NA    | NA    |
| O13561 | Dynactin subunit 2                                                            | 5    | 0.81  | 0.081 | 0.064 |
| P00403 | Cytochrome c oxidase subunit 2                                                | 3    | 0.81  | 0.279 | 0.534 |
| P52244 | 4S5 ribosomal protein S15a                                                    | 5    | 0.81  | 0.071 | 0.043 |
| Q9P324 | DnaJ homolog subfamily C member 5                                             | 1    | 0.81  | NA    | NA    |
| P00488 | Coagulation factor XIII A chain                                               | 1    | 0.81  | NA    | NA    |
| P81225 | Ras-related protein Rap-2b                                                    | 1    | 0.81  | 0.173 | 0.348 |
| P42025 | Beta-centradin                                                                | 1    | 0.81  | NA    | NA    |
| P27816 | Microtubule-associated protein 4                                              | 5    | 0.81  | 0.229 | 0.452 |
| Q9RT55 | Phosphatidylinositol-3-phosphatase SAC1                                       | 1    | 0.81  | 0.145 | 0.274 |
| P51532 | Transcription activator BRG1                                                  | 1    | 0.81  | NA    | NA    |
| P16435 | NADPH-cytochrome P450 reductase                                               | 3    | 0.80  | 0.084 | 0.123 |
| O95811 | Angiogenesis-inducing factor 1, mitochondrial                                 | 2    | 0.80  | NA    | NA    |
| P56402 | Emerin                                                                        | 5    | 0.80  | 0.145 | 0.204 |
| O9H970 | Exocyst complex component 1                                                   | 1    | 0.80  | NA    | NA    |
| P54520 | Alpha-soluble NSF attachment protein                                          | 2    | 0.80  | 0.449 | 0.913 |
| Q9Y4F1 | FERM, RhoGEF and pleckstrin domain-containing protein 1                       | 2    | 0.80  | NA    | NA    |
| P50151 | Guanine nucleotide-binding protein G(I)/G(S)/G(O) subunit gamma-10            | 1    | 0.80  | NA    | NA    |
| Q14556 | Phosphoribosyl pyrophosphate synthase-associated protein 1                    | 2    | 0.80  | NA    | NA    |
| O86V87 | Scavenger receptor cysteine-rich type 1 protein M130                          | 1    | 0.80  | NA    | NA    |
| P21589 | S <sup>2</sup> -nucleotidase                                                  | 0.80 | NA    | NA    |       |
| P21964 | Catechol O-methyltransferase                                                  | 1    | 0.79  | NA    | NA    |
| O10567 | AP-1 complex subunit beta-1                                                   | 3    | 0.79  | 0.169 | 0.306 |
| P02545 | Protein-A2                                                                    | 5    | 0.79  | 0.138 | 0.168 |
| O12913 | Receptor-type tyrosine-protein phosphatase eta                                | 1    | 0.79  | NA    | NA    |
| O75914 | Semithionone-protein kinase PAK 3                                             | 1    | 0.79  | NA    | NA    |
| P48416 | Alpha-aminoadipate-semialdehyde dehydrogenase                                 | 1    | 0.79  | NA    | NA    |
| O94826 | Mitochondrial import receptor subunit TOM70                                   | 2    | 0.79  | NA    | NA    |
| P56362 | Galectin-1                                                                    | 5    | 0.79  | 0.114 | 0.104 |
| O14011 | Casp8-inducible RNA-binding protein                                           | 1    | 0.79  | NA    | NA    |
| O8ZD70 | Abi interactor 1                                                              | 1    | 0.79  | NA    | NA    |
| P25690 | Protein PKM1                                                                  | 5    | 0.78  | 0.143 | 0.162 |
| O86V98 | Stimulator of interferon genes protein                                        | 2    | 0.78  | NA    | NA    |
| P35637 | RNA-binding protein FUS                                                       | 5    | 0.78  | 0.281 | 0.427 |
| P37235 | Hippocampin-like protein 1                                                    | 2    | 0.78  | NA    | NA    |
| Q93009 | Ubiquitin carboxyl-terminal hydrolase 7                                       | 1    | 0.78  | NA    | NA    |
| Q92252 | Methylmalonate-semialdehyde dehydrogenase [acylating], mitochondrial          | 3    | 0.78  | 0.075 | 0.079 |
| O9H444 | Changed nucleoside body protein 4b                                            | 1    | 0.78  | NA    | NA    |
| O05193 | Dynamitin-1                                                                   | 1    | 0.78  | NA    | NA    |
| O9H4D4 | Septin-9                                                                      | 5    | 0.77  | 0.062 | 0.015 |
| P31942 | Heterogeneous nuclear ribonucleoprotein H3                                    | 1    | 0.77  | NA    | NA    |
| O94979 | Protein transport protein Sec13A                                              | 5    | 0.77  | 0.084 | 0.038 |
| O15226 | Selenium-binding protein 1                                                    | 4    | 0.77  | 0.027 | 0.002 |
| O16861 | UTP-glucose-1-phosphate uridylyltransferase                                   | 2    | 0.77  | NA    | NA    |
| P51648 | Fatty acylside dehydrogenase                                                  | 1    | 0.77  | NA    | NA    |
| Q9Y9V9 | Nesprin-2                                                                     | 2    | 0.76  | NA    | NA    |
| P52735 | Protein SEC13 homolog                                                         | 1    | 0.76  | NA    | NA    |
| P06443 | Dolichyl-diphosphooligosaccharide--protein glycosyltransferase subunit 1      | 5    | 0.76  | 0.112 | 0.073 |
| O05271 | ATP-dependent RNA-helicase DDX3X                                              | 3    | 0.76  | 0.167 | 0.085 |
| P35813 | Protein phosphatase 1A                                                        | 1    | 0.76  | NA    | NA    |
| O99629 | Caspase-1                                                                     | 1    | 0.76  | NA    | NA    |
| O9H6L7 | Plasminogen receptor (KT)                                                     | 1    | 0.76  | NA    | NA    |
| P51148 | Ras-related protein Rab-5C                                                    | 1    | 0.76  | NA    | NA    |
| O16270 | Insulin-like growth factor-binding protein 7                                  | 4    | 0.76  | 0.210 | 0.275 |
| P30262 | Guanine nucleotide-binding protein G(i) subunit alpha isoforms short          | 4    | 0.76  | NA    | NA    |
| O9C2R7 | ATP-dependent RNA helicase DDX24                                              | 1    | 0.75  | NA    | NA    |
| O12913 | Ras GTPase-activating protein-binding protein 1                               | 2    | 0.75  | NA    | NA    |
| O62021 | C-Jun amino-terminal kinase-interacting protein 4                             | 1    | 0.75  | NA    | NA    |
| P04792 | Heat shock protein beta-1                                                     | 5    | 0.75  | 0.138 | 0.107 |
| O9P027 | Apoptoprotein A-V                                                             | 5    | 0.75  | 0.293 | 0.384 |
| O9Y6N5 | Sulfide quinone oxidoreductase, mitochondrial                                 | 5    | 0.75  | 0.260 | 0.331 |
| O53QD0 | Estradiol 17 beta-dehydrogenase 12                                            | 5    | 0.75  | 0.117 | 0.070 |
| O13075 | Early endosome antigen 1                                                      | 2    | 0.75  | NA    | NA    |
| O96S07 | Cancer-related nucleoside-triphosphatase                                      | 1    | 0.75  | NA    | NA    |
| O12787 | Aspartyl-asparaginyl beta-hydroxylase                                         | 5    | 0.74  | 0.068 | 0.012 |
| P48444 | Dolichyl-diphosphooligosaccharide--protein glycosyltransferase subunit 2      | 5    | 0.74  | 0.135 | 0.114 |
| P48458 | Signal recognition particle 9 kDa protein                                     | 3    | 0.74  | 0.217 | 0.302 |
| AF9598 | E3-ubiquitin-protein ligase complex subunit 2                                 | 4    | 0.74  | NA    | NA    |
| P55060 | Exportin-2                                                                    | 4    | 0.74  | 0.037 | 0.004 |
| O9P0K7 | Arkytorin                                                                     | 1    | 0.74  | NA    | NA    |
| Q9U2E7 | Structural maintenance of chromosomes protein 3                               | 1    | 0.74  | 0.067 | 0.045 |
| O14735 | CDP-diacylglycerol-inositol 3-phosphatidyliniferase                           | 2    | 0.74  | NA    | NA    |
| O00765 | Cytoskeleton-associated protein 4                                             | 5    | 0.73  | 0.086 | 0.023 |
| O12718 | NADH dehydrogenase [ubiquinone] 1 alpha subcomplex subunit 5                  | 1    | 0.73  | NA    | NA    |
| P00367 | Glutamate dehydrogenase 1, mitochondrial                                      | 5    | 0.72  | 0.043 | 0.002 |
| O6U050 | Calcium-binding mitochondrial carrier protein Aralar2                         | 1    | 0.72  | NA    | NA    |
| P00452 | Collagen alpha-1(I) chain                                                     | 3    | 0.72  | 0.068 | 0.029 |
| P53992 | Protein transport protein Sec24C                                              | 1    | 0.72  | NA    | NA    |
| P56221 | Catenin alpha-1                                                               | 3    | 0.72  | 0.060 | 0.031 |
| P46297 | Protein ERN1-53                                                               | 0.71 | 0.132 | 0.062 |       |
| P22786 | Camifene O-palmitoyltransferase 2, mitochondrial                              | 1    | 0.71  | NA    | NA    |
| O14633 | Dynactin subunit 1                                                            | 5    | 0.71  | 0.087 | 0.018 |
| O8TE3X | Importin-4                                                                    | 1    | 0.71  | NA    | NA    |
| O99442 | Translocation protein SEC28                                                   | 3    | 0.71  | 0.155 | 0.155 |
| P10321 | HLA class I histocompatibility antigen, Cw-7 alpha chain                      | 2    | 0.70  | NA    | NA    |
| O9NP97 | Dynein light chain roadblock-type 1                                           | 1    | 0.70  | NA    | NA    |
| O75323 | Protein NipSnap homolog 2                                                     | 1    | 0.70  | NA    | NA    |
| P00740 | Coagulation factor IX                                                         | 1    | 0.70  | NA    | NA    |
| O6NUM8 | Abi-trans-retinol 13,14-reductase                                             | 1    | 0.70  | NA    | NA    |
| Q9Y277 | Voltage-dependent anion-selective channel protein 3                           | 3    | 0.70  | 0.157 | 0.148 |
| P58198 | Eukaryotic initiation factor 4A-III                                           | 1    | 0.70  | NA    | NA    |
| O9D0C3 | Alkocyte plasma membrane-associated protein                                   | 5    | 0.69  | 0.180 | 0.111 |
| P86603 | Complement factor H                                                           | 3    | 0.69  | 0.427 | 0.462 |
| Q14956 | Transmembrane glycoprotein NMB                                                | 5    | 0.69  | 0.498 | 0.494 |
| P87870 | Casein kinase II subunit beta                                                 | 3    | 0.69  | 0.108 | 0.074 |
| O43707 | Alpha-actinin-4                                                               | 5    | 0.69  | 0.123 | 0.038 |
| Q71D03 | Histone H3.2                                                                  | 1    | 0.69  | NA    | NA    |
| P54709 | Sodium/potassium-transporting ATPase subunit beta-3                           | 5    | 0.69  | 0.201 | 0.133 |
| P29266 | Nitrotyrosylated alanine-rich C-kinase substrate                              | 5    | 0.69  | 0.160 | 0.078 |
| O9Y639 | Neuroplastin                                                                  | 2    | 0.68  | NA    | NA    |
| P16615 | Sarcoplasmic/endoplasmic reticulum calcium ATPase 2                           | 5    | 0.68  | 0.106 | 0.022 |
| P60706 | Actin, cytoplasmic 1                                                          | 3    | 0.68  | 0.078 | 0.037 |
| O9Y300 | RNA-splicing ligase RtcB homolog                                              | 5    | 0.68  | 0.046 | 0.001 |
| P56995 | Arnenin A11                                                                   | 5    | 0.67  | 0.151 | 0.060 |
| O15165 | Serum paraoxonase/arylesterase 2                                              | 1    | 0.67  | NA    | NA    |
| P35580 | Myosin-10                                                                     | 5    | 0.67  | 0.147 | 0.051 |
| P0C208 | Histone H2A type 1                                                            | 4    | 0.67  | 0.127 | 0.048 |
| O14204 | Cytosolic dynein 1 heavy chain 1                                              | 5    | 0.66  | 0.090 | 0.010 |
| O75915 | PRA1 family protein 3                                                         | 4    | 0.66  | 0.139 | 0.060 |
| P42566 | Epidermal growth factor receptor substrate 15                                 | 1    | 0.66  | NA    | NA    |
| P04217 | Alpha-1B-glycoprotein                                                         | 5    | 0.66  | 0.267 | 0.197 |
| O16795 | NADH dehydrogenase [ubiquinone] 1 alpha subcomplex subunit 9, mitochondrial   | 4    | 0.66  | 0.178 | 0.102 |
| P43307 | Translocin-associated protein subunit alpha                                   | 2    | 0.66  | NA    | NA    |
| P46939 | Utrrophin                                                                     | 4    | 0.65  | 0.139 | 0.056 |
| O96015 | Rellucocublin-3                                                               | 1    | 0.65  | NA    | NA    |
| P12235 | ADP-ATP translocase 1                                                         | 1    | 0.65  | NA    | NA    |
| O75477 | Erlin-1                                                                       | 1    | 0.65  | NA    | NA    |
| Q01813 | ATP-dependent 6-phosphofructokinase, platelet type                            | 2    | 0.65  | NA    | NA    |
| O65207 | Myelin protein zero-like protein 1                                            | 1    | 0.65  | NA    | NA    |
| P04114 | Apoptoprotein B-100                                                           | 3    | 0.65  | 0.534 | 0.502 |
| P08311 | Cathepsin G                                                                   | 0.64 | NA    | NA    |       |
| O16695 | Histone H3.1                                                                  | 4    | 0.64  | 0.171 | 0.082 |
| P62805 | Histone H4                                                                    | 5    | 0.64  | 0.135 | 0.030 |
| O96552 | GPI transaminase component PIG-S                                              | 1    | 0.64  | NA    | NA    |
| O15149 | Plectin                                                                       | 5    | 0.64  | 0.062 | 0.002 |
| O96905 | Endoplasmic reticulum-Golgi intermediate compartment protein 1                | 3    | 0.64  | 0.174 | 0.122 |
| P01437 | Tubulin beta chain                                                            | 4    | 0.64  | 0.102 | 0.022 |
| O15562 | Transforming growth factor-beta-induced protein ig-h3                         | 4    | 0.64  | 0.330 | 0.264 |
| P14209 | CD39 antigen                                                                  | 1    | 0.63  | NA    | NA    |
| O00264 | Membrane-associated progesterone receptor component 1                         | 5    | 0.63  | 0.133 | 0.026 |
| P08107 | Heat shock 70 kDa protein 1A1B                                                | 5    | 0.63  | 0.102 | 0.011 |
| O60504 | Vinculin                                                                      | 1    | 0.63  | NA    | NA    |
| O96RX8 | Protein regulatory protein FAM213A                                            | 3    | 0.63  | 0.143 | 0.083 |
| O9NFV8 | N-acetylneuraminate cytidylyltransferase                                      | 1    | 0.63  | NA    | NA    |
| O14764 | Major vault protein                                                           | 1    | 0.62  | 0.068 | 0.002 |
| O43865 | Putative adenosylhomocysteinase 2                                             | 3    | 0.62  | 0.135 | 0.074 |
| P81163 | Alpha-centradin                                                               | 2    | 0.62  | NA    | NA    |
| P00390 | Citratehione reductase, mitochondrial                                         | 1    | 0.62  | 0.189 | 0.128 |
| O9H223 | EH domain-containing protein 4                                                | 2    | 0.62  | NA    | NA    |
| O60313 | Dynamitin-like 120 kDa protein, mitochondrial                                 | 5    | 0.62  | 0.087 | 0.005 |
| Q9Y232 | Band 4.1 like protein 3                                                       | 2    | 0.62  | NA    | NA    |
| O15019 | Septin-2                                                                      | 5    | 0.62  | 0.084 | 0.005 |

Table S16-Average Metastatic Tumors

|        |                                                                     |   |      |       |         |
|--------|---------------------------------------------------------------------|---|------|-------|---------|
| O60E03 | Tubulin alpha-1C chain                                              | 3 | 0.61 | 0.222 | 0.158   |
| P11655 | Calpain-2 catalytic subunit                                         | 2 | 0.61 | NA    | NA      |
| O68Z22 | Sialohectin                                                         | 1 | 0.61 | NA    | NA      |
| O00610 | Clafrin heavy chain 1                                               | 5 | 0.61 | 0.124 | 0.016   |
| O29505 | COP9 signalosome complex subunit 5                                  | 2 | 0.61 | NA    | NA      |
| P05362 | Intercellular adhesion molecule 1                                   | 4 | 0.61 | 0.157 | 0.050   |
| O99VAZ | Septin-11                                                           | 3 | 0.60 | 0.178 | 0.108   |
| O05692 | Caldesmon                                                           | 5 | 0.60 | 0.235 | 0.099   |
| Q13418 | Integrin-linked protein kinase                                      | 2 | 0.60 | NA    | NA      |
| O6NC43 | Reticulon-4                                                         | 5 | 0.60 | 0.051 | 0.001   |
| P05443 | 2',3'-cyclic-nucleotide 3-phosphodiesterase                         | 5 | 0.60 | 0.100 | 0.009   |
| P13861 | cAMP-dependent protein kinase type II-alpha regulatory subunit      | 5 | 0.60 | 0.037 | 0.000   |
| O66CW1 | AP-2 complex subunit mu                                             | 2 | 0.60 | NA    | NA      |
| O95762 | AP-2 complex subunit alpha-1                                        | 5 | 0.59 | 0.125 | 0.014   |
| O9MKJ1 | Calcium-binding mitochondrial carrier protein SCaMC-1               | 4 | 0.59 | 0.104 | 0.015   |
| O9C0E8 | Protein lanapark                                                    | 2 | 0.59 | NA    | NA      |
| P02776 | Platelet factor 4                                                   | 1 | 0.58 | NA    | NA      |
| P47755 | F-actin-capping protein subunit alpha-2                             | 2 | 0.58 | NA    | NA      |
| P12111 | Collagen alpha-2(VI) chain                                          | 2 | 0.58 | 0.168 | 0.052   |
| Q71U36 | Tubulin alpha-1A chain                                              | 1 | 0.58 | NA    | NA      |
| O9J616 | Guanine nucleotide-binding protein G(i)(G)(S)(G) subunit gamma-12   | 1 | 0.58 | NA    | NA      |
| P42167 | Lamins associated polypeptide 2, isoforms beta/gamma                | 1 | 0.57 | 0.139 | 0.029   |
| O75131 | Copine-3                                                            | 5 | 0.58 | 0.123 | 0.011   |
| O6NC26 | LEM domain-containing protein 2                                     | 1 | 0.57 | NA    | NA      |
| Q14344 | Guanine nucleotide-binding protein subunit alpha-13                 | 1 | 0.57 | 0.062 | 0.003   |
| O9MLV3 | Tropomodulin-3                                                      | 1 | 0.57 | NA    | NA      |
| P28208 | ATP-binding cassette sub-family D member 3                          | 1 | 0.57 | NA    | NA      |
| P00352 | Retinal dehydrogenase 1                                             | 5 | 0.57 | 0.271 | 0.106   |
| O9P9M0 | Core histone macro-H2A.2                                            | 2 | 0.57 | NA    | NA      |
| O69716 | Catein delta-1                                                      | 1 | 0.57 | 0.128 | 0.011   |
| P68363 | Tubulin alpha-1B chain                                              | 1 | 0.57 | NA    | NA      |
| O9A919 | Endonuclease domain-containing protein                              | 3 | 0.56 | 0.147 | 0.060   |
| P08119 | Platelet-derived growth factor receptor beta                        | 1 | 0.56 | NA    | NA      |
| P09497 | Clafrin light chain B                                               | 4 | 0.56 | 0.284 | 0.131   |
| O9K211 | Very long-chain enoyl-CoA reductase                                 | 1 | 0.55 | NA    | NA      |
| O9JL44 | Programmed cell death 6-interacting protein                         | 1 | 0.55 | 0.110 | 0.008   |
| P25583 | High mobility group protein B2                                      | 5 | 0.55 | 0.170 | 0.025   |
| Q02880 | DNA topoisomerase 2-beta                                            | 1 | 0.55 | NA    | NA      |
| Q12850 | Unconventional myosin Ie                                            | 1 | 0.55 | NA    | NA      |
| P11498 | Pyruvate carboxylase, mitochondrial                                 | 1 | 0.55 | NA    | NA      |
| O14650 | Myosin regulatory light chain 12B                                   | 5 | 0.55 | 0.141 | 0.012   |
| O6S5J8 | Extended synaptotagmin-1                                            | 5 | 0.54 | 0.088 | 0.002   |
| P05091 | Aldehyde dehydrogenase, mitochondrial                               | 5 | 0.54 | 0.134 | 0.010   |
| P04040 | Catalase                                                            | 5 | 0.54 | 0.308 | 0.115   |
| O99338 | Ubiquitin carboxyl-terminal hydrolase isozyme L1                    | 5 | 0.54 | 0.244 | 0.084   |
| P11413 | Glucose-6-phosphate 1-dehydrogenase                                 | 3 | 0.54 | 0.253 | 0.134   |
| Q15181 | Septin-7                                                            | 5 | 0.54 | 0.057 | 0.004   |
| O69814 | Histone H2B type 1-K                                                | 1 | 0.53 | NA    | NA      |
| P17012 | cAMP-dependent protein kinase catalytic subunit alpha               | 4 | 0.53 | 0.089 | 0.006   |
| Q14244 | Futillin-2                                                          | 4 | 0.53 | 0.234 | 0.114   |
| P12109 | Collagen alpha-1(VI) chain                                          | 5 | 0.53 | 0.216 | 0.043   |
| Q09665 | Neuroblast differentiation-associated protein ANNAK                 | 5 | 0.53 | 0.121 | 0.028   |
| O9NV07 | Alpha-parvin                                                        | 1 | 0.53 | NA    | NA      |
| P00303 | CD81 antigen                                                        | 3 | 0.53 | 0.095 | 0.010   |
| P07357 | Complement component C8 alpha chain                                 | 1 | 0.53 | NA    | NA      |
| P12110 | Collagen alpha-2(VI) chain                                          | 5 | 0.52 | 0.213 | 0.039   |
| P23634 | Plasma membrane calcium-transporting ATPase 4                       | 4 | 0.52 | 0.118 | 0.012   |
| O48323 | Unconventional myosinId                                             | 4 | 0.52 | 0.193 | 0.041   |
| O9V490 | Talin-1                                                             | 5 | 0.52 | 0.085 | 0.001   |
| P15144 | Aminopeptidase N                                                    | 1 | 0.52 | NA    | NA      |
| P08133 | Annexin A6                                                          | 1 | 0.51 | 0.155 | 0.008   |
| P01024 | Complement C3                                                       | 5 | 0.51 | 0.290 | 0.082   |
| Q02552 | Lamins-B2                                                           | 5 | 0.51 | 0.075 | 0.001   |
| Q43175 | D-3-phosphoglycerate dehydrogenase                                  | 2 | 0.51 | NA    | NA      |
| O15413 | Ryanodine receptor 3                                                | 1 | 0.51 | NA    | NA      |
| P35222 | Catein beta-1                                                       | 1 | 0.51 | 0.242 | 0.048   |
| P08571 | Monocyte differentiation antigen CD14                               | 5 | 0.50 | 0.249 | 0.052   |
| O00577 | Transcriptional activator protein Pur-alpha                         | 3 | 0.50 | 0.202 | 0.075   |
| P05579 | Myosin-9                                                            | 5 | 0.50 | 0.169 | 0.015   |
| P00387 | NADH-cytochrome b5 reductase 3                                      | 5 | 0.49 | 0.141 | 0.007   |
| P12814 | Alpha-actinin-1                                                     | 5 | 0.49 | 0.098 | 0.000   |
| O6L403 | Phenylethylene oxidase 1                                            | 5 | 0.49 | 0.128 | 0.005   |
| P06960 | Myosin light polypeptide 6                                          | 5 | 0.49 | 0.097 | 0.002   |
| O6C388 | Aktasin-3                                                           | 5 | 0.49 | 0.157 | 0.010   |
| Q15336 | Vesicle-associated membrane protein 3                               | 2 | 0.49 | 0.102 | 0.020   |
| O15653 | Synaptophysin-like protein 1                                        | 2 | 0.49 | NA    | NA      |
| P00355 | Histone H2A.2                                                       | 5 | 0.49 | 0.062 | 0.001   |
| Q08722 | Leukocyte surface antigen CD47                                      | 2 | 0.49 | NA    | NA      |
| P00073 | Annexin A7                                                          | 3 | 0.48 | 0.158 | 0.043   |
| P04216 | Thy-1 membrane glycoprotein                                         | 4 | 0.48 | 0.100 | 0.005   |
| P35611 | Alpha-adducin                                                       | 3 | 0.47 | 0.055 | 0.005   |
| P32119 | Perlecan                                                            | 5 | 0.47 | 0.096 | 0.002   |
| O78746 | Calcium-binding mitochondrial carrier protein Astar1                | 1 | 0.47 | NA    | NA      |
| O8NEV1 | Casein kinase II subunit alpha 3                                    | 1 | 0.47 | NA    | NA      |
| P05270 | Dynamin-2                                                           | 1 | 0.47 | NA    | NA      |
| O9K2N4 | EH domain-containing protein 1                                      | 4 | 0.47 | 0.154 | 0.016   |
| O15404 | Ras suppressor protein 1                                            | 1 | 0.46 | NA    | NA      |
| P41222 | Frotylgandrin-H2 isomerase                                          | 2 | 0.46 | NA    | NA      |
| O69811 | ATP-binding cassette sub-family A member 8                          | 2 | 0.46 | NA    | NA      |
| O75655 | Futillin-1                                                          | 2 | 0.46 | NA    | NA      |
| Q14192 | Four and a half LIM domain protein 2                                | 1 | 0.46 | NA    | NA      |
| P02751 | Fibronectin                                                         | 5 | 0.45 | 0.452 | 0.156   |
| P06918 | Carbonic anhydrase 2                                                | 2 | 0.45 | NA    | NA      |
| P04196 | Histidine-rich glycoprotein                                         | 4 | 0.44 | 0.507 | 0.205   |
| P07358 | Complement component C8 beta chain                                  | 3 | 0.43 | 0.482 | 0.212   |
| O96Z08 | Protein Niban                                                       | 2 | 0.43 | NA    | NA      |
| O5JWF2 | Guanine nucleotide-binding protein G(s) subunit alpha isoforms XLas | 1 | 0.43 | NA    | NA      |
| O94760 | N(G),N(G)-dimethylarginine dimethylaminohydrolase 1                 | 1 | 0.43 | NA    | NA      |
| O9V456 | Talin-2                                                             | 1 | 0.43 | NA    | NA      |
| O02591 | Complement factor H-related protein 1                               | 1 | 0.42 | NA    | NA      |
| O5JRA6 | Melanoma inhibitory activity protein 3                              | 1 | 0.42 | NA    | NA      |
| Q15041 | ADP-ribosylation factor-like protein 6-interacting protein 1        | 1 | 0.42 | NA    | NA      |
| Q4VEY8 | Gamma-adducin                                                       | 1 | 0.41 | NA    | NA      |
| O13557 | Calcium/calmodulin-dependent protein kinase type II subunit delta   | 1 | 0.41 | NA    | NA      |
| O86722 | Cholic acid phosphotransferase beta-mannosyltransferase             | 1 | 0.41 | NA    | NA      |
| O9BTV4 | Transmembrane protein 43                                            | 3 | 0.41 | 0.331 | 0.112   |
| P23229 | Integrin alpha-6                                                    | 1 | 0.40 | NA    | NA      |
| P23142 | Filutin-1                                                           | 1 | 0.40 | NA    | NA      |
| P26008 | Integrin alpha-3                                                    | 2 | 0.40 | NA    | NA      |
| P00747 | Plasminogen                                                         | 5 | 0.39 | 0.442 | 0.103   |
| P29626 | Guanine nucleotide-binding protein subunit alpha-11                 | 1 | 0.39 | 0.315 | 0.097   |
| Q14118 | Dystroglycan                                                        | 1 | 0.37 | NA    | NA      |
| O6NR12 | PDZ and LIM domain protein 7                                        | 1 | 0.37 | NA    | NA      |
| P28447 | Protein S100-A4                                                     | 5 | 0.37 | 0.524 | 0.129   |
| O96UF5 | Tubulin beta-6 chain                                                | 2 | 0.37 | NA    | NA      |
| P22413 | Ectonucleotide pyrophosphatase/phosphodiesterase family member 1    | 2 | 0.37 | 0.324 | 0.089   |
| O69HC4 | PDZ and LIM domain protein 5                                        | 2 | 0.36 | NA    | NA      |
| O96HN2 | Putative adenosylhomocysteinase 3                                   | 1 | 0.36 | NA    | NA      |
| P00756 | Integrin alpha-V                                                    | 1 | 0.36 | NA    | NA      |
| P03010 | AP-2 complex subunit beta                                           | 1 | 0.36 | NA    | NA      |
| O77700 | Target of Nesh-SH3                                                  | 2 | 0.35 | NA    | NA      |
| O6NR43 | Choline transporter-like protein 2                                  | 1 | 0.35 | NA    | NA      |
| P54289 | Voltage-dependent calcium channel subunit alpha-2delta-1            | 1 | 0.35 | NA    | NA      |
| O53052 | Sialin-1                                                            | 1 | 0.35 | NA    | NA      |
| O9N115 | Lipoma-preferred partner                                            | 2 | 0.33 | NA    | NA      |
| P13031 | Ras-related protein R-Ras                                           | 1 | 0.33 | NA    | NA      |
| P59768 | Guanine nucleotide-binding protein G(i)(G)(S)(G) subunit gamma-2    | 1 | 0.33 | NA    | NA      |
| P02879 | Fibrinogen gamma chain                                              | 5 | 0.33 | 0.415 | 0.054   |
| P01600 | Ig kappa chain V1 region Hau                                        | 1 | 0.32 | NA    | NA      |
| P02654 | Apolipoprotein C-I                                                  | 5 | 0.31 | 0.468 | 0.065   |
| O14786 | Neurophilin-1                                                       | 2 | 0.31 | NA    | NA      |
| P02749 | Beta-2-glycoprotein 1                                               | 4 | 0.30 | 0.512 | 0.102   |
| O29252 | Histone H1x                                                         | 2 | 0.30 | NA    | NA      |
| P02875 | Fibrinogen beta chain                                               | 5 | 0.29 | 0.447 | 0.052   |
| P14207 | Folate receptor beta                                                | 1 | 0.29 | NA    | NA      |
| Q15361 | Microfilament-associated protein 5                                  | 1 | 0.29 | NA    | NA      |
| P00026 | Sodium/potassium-transporting ATPase subunit beta-1                 | 1 | 0.28 | NA    | NA      |
| Q08431 | Lactoferrin                                                         | 2 | 0.28 | NA    | NA      |
| P16126 | Lactoferrin C                                                       | 2 | 0.27 | 0.579 | 0.084   |
| P0DJI8 | Serum amyloid A-1 protein                                           | 1 | 0.26 | NA    | NA      |
| P60201 | Myosin preadipol protein                                            | 2 | 0.26 | NA    | NA      |
| P05164 | Myeloperoxidase                                                     | 5 | 0.26 | 0.628 | 0.099   |
| ABMTJ3 | Guanine nucleotide-binding protein G(i) subunit alpha-3             | 1 | 0.26 | NA    | NA      |
| O96K22 | BTB/POZ domain-containing protein NCTD12                            | 3 | 0.24 | 0.352 | 0.055   |
| O9V240 | C-type lectin domain family 11 member A                             | 1 | 0.24 | NA    | NA      |
| O6LX08 | Peptidase inhibitor 16                                              | 2 | 0.23 | NA    | NA      |
| P14555 | Phosphatase A2 membrane associated                                  | 2 | 0.21 | NA    | NA      |
| P19643 | Complement component C7                                             | 3 | 0.21 | 0.421 | 0.066   |
| P02536 | Apolipoprotein C-II                                                 | 1 | 0.19 | NA    | NA      |
| P05787 | Neurin, type I cytoskeletal                                         | 2 | 0.19 | NA    | NA      |
| P14136 | Gial fibrillary acidic protein E                                    | 2 | 0.18 | NA    | NA      |
| Q02224 | Centromere-associated protein E                                     | 1 | 0.18 | NA    | NA      |
| P12277 | Creatine kinase B1 type                                             | 1 | 0.17 | NA    | NA      |
| P02735 | Actin, aortic smooth muscle                                         | 1 | 0.16 | NA    | NA      |
| O8R6C1 | Protein FRAZDE                                                      | 1 | 0.15 | NA    | NA      |
| Q63ZY3 | KN motif and ankyrin repeat domain-containing protein 2             | 1 | 0.15 | NA    | NA      |
| O92777 | Synaptasin-2                                                        | 2 | 0.15 | NA    | NA      |
| O6LVY3 | Olfactomedin-like protein 1                                         | 2 | 0.14 | NA    | NA      |
| O6NRN5 | Olfactomedin-like protein 3                                         | 1 | 0.13 | NA    | NA      |
| O14767 | Lateral-transforming growth factor beta-binding protein 2           | 1 | 0.11 | NA    | NA      |
| P35243 | Recoverin                                                           | 1 | 0.11 | NA    | NA      |
| P21246 | Plectrognin                                                         | 2 | 0.10 | NA    | NA      |
| P35559 | Filamin-2                                                           | 1 | 0.10 | NA    | NA      |
| O9HCJ8 | Synaptic vesicle membrane protein VAMP-1 homolog-like               | 1 | 0.10 | NA    | NA      |
| P03973 | Arilukoproteinase                                                   | 2 | 0.09 | NA    | NA      |
| Q07564 | Protein-density lipoprotein receptor-related protein 1              | 5 | 0.46 | 0.163 | 1.8E-04 |
| P68371 | Tubulin beta-4B chain                                               | 5 | 0.45 | 0.060 | 1.8E-04 |
| O9A905 | Erlin-2                                                             | 5 | 0.44 | 0.163 | 7.7E-03 |
| P05023 | Sodium/potassium-transporting ATPase subunit alpha-1                | 5 | 0.44 | 0.112 | 1.9E-03 |
| P05556 | Integrin beta-1                                                     | 5 | 0.44 | 0.112 | 1.8E-03 |
| P04999 | Guanine nucleotide-binding protein G(i) subunit alpha-2             | 5 | 0.43 | 0.119 | 2.0E-03 |
| O9K2M1 | Myosin                                                              | 5 | 0.42 | 0.284 | 3.1E-02 |
| O9B6L0 | Tensin-1                                                            | 4 | 0.42 | 0.267 | 4.8E-02 |
| P13987 | CD59 glycoprotein                                                   | 4 | 0.42 | 0.297 | 3.9E-02 |
| P00396 | Calsin                                                              | 4 | 0.42 | 0.184 | 8.6E-03 |
| P00C05 | Complement C4 B                                                     | 4 | 0.41 | 0.155 | 1.1E-02 |
| P07099 | Epoikide hydrolase 1                                                | 4 | 0.41 | 0.161 | 4.1E-03 |
| P43121 | Cell surface glycoprotein MUC18                                     | 5 | 0.40 | 0.051 | 5.7E-05 |
| P06899 | Histone H2B type 1-J                                                | 5 | 0.40 | 0.175 | 6.5E-03 |
| O58685 | N(G),N(G)-dimethylarginine dimethylaminohydrolase 2                 | 4 | 0.40 | 0.170 | 1.2E-02 |
| P00738 | Haptoglobin                                                         | 5 | 0.40 | 0.112 | 1.2E-03 |
| P07305 | Histone H1.0                                                        | 4 | 0.39 | 0.280 | 3.6E-02 |
| P13871 | Complement component C6                                             | 4 | 0.39 | 0.217 | 2.5E-02 |
| P62873 | Guanine nucleotide-binding protein G(i)(G)(S)(G) subunit beta-1     | 3 | 0.37 | 0.049 | 2.4E-03 |
| O00159 | Unconventional myosin-c                                             | 5 | 0.36 | 0.081 | 7.7E-05 |
| P11626 | Vinculin                                                            | 5 | 0.36 | 0.098 | 8.6E-06 |
| P07942 | Lamins subunit beta-1                                               | 5 | 0.35 | 0.228 | 1.6E-02 |

Table S16-Average Metastatic Tumors

|        |                                                                      |   |       |       |         |
|--------|----------------------------------------------------------------------|---|-------|-------|---------|
| Q01082 | Spectrin beta chain, non-erythrocytic 1                              | 5 | 0.36  | 0.125 | 1.1E-03 |
| Q11813 | Spectrin alpha chain, non-erythrocytic 1                             | 5 | 0.35  | 0.189 | 6.2E-04 |
| P00450 | Ceruloplasmin                                                        | 5 | 0.34  | 0.250 | 1.4E-02 |
| O00488 | Agrin                                                                | 4 | 0.34  | 0.288 | 3.4E-02 |
| O75369 | Filamin-B                                                            | 5 | 0.33  | 0.143 | 1.5E-03 |
| P21533 | Filamin-A                                                            | 5 | 0.32  | 0.106 | 4.5E-04 |
| P01011 | Alpha-1-antichymotrypsin                                             | 5 | 0.31  | 0.339 | 2.7E-02 |
| P08960 | Collagen alpha-1(XVIII) chain                                        | 5 | 0.31  | 0.231 | 7.0E-03 |
| O15230 | Laminin subunit alpha-5                                              | 5 | 0.30  | 0.208 | 4.6E-03 |
| P07355 | Annexin A2                                                           | 5 | 0.30  | 0.137 | 9.4E-04 |
| Q13509 | Tubulin beta-3 chain                                                 | 5 | 0.30  | 0.262 | 4.4E-02 |
| Q13425 | Beta-2-syntenin                                                      | 3 | 0.30  | 0.055 | 2.1E-03 |
| P05511 | Alpha-crystallin B chain                                             | 5 | 0.30  | 0.241 | 7.5E-03 |
| P08493 | Topoisomerase alpha-1 chain                                          | 5 | 0.30  | 0.063 | 4.2E-05 |
| P02462 | Collagen alpha-1(V) chain                                            | 4 | 0.29  | 0.328 | 3.3E-02 |
| P27105 | Erythrocyte band 7 integral membrane protein                         | 5 | 0.29  | 0.278 | 1.1E-02 |
| Q01995 | Transgelin                                                           | 5 | 0.28  | 0.210 | 3.8E-03 |
| P08294 | Extracellular superoxide dismutase (Cu-Zn)                           | 5 | 0.28  | 0.138 | 7.8E-04 |
| P02871 | Fibrinogen alpha chain                                               | 5 | 0.28  | 0.448 | 4.8E-02 |
| P08572 | Collagen alpha-2(V) chain                                            | 5 | 0.28  | 0.242 | 6.2E-03 |
| Q06202 | Polymerase I and transcript release factor                           | 5 | 0.28  | 0.159 | 1.3E-03 |
| P16157 | Ankyrin-1                                                            | 5 | 0.27  | 0.287 | 1.2E-02 |
| P55288 | Laminin subunit beta-2                                               | 5 | 0.27  | 0.154 | 1.1E-03 |
| O02852 | A-kinase anchor protein 12                                           | 5 | 0.27  | 0.197 | 2.7E-03 |
| P50895 | Basal cell adhesion molecule                                         | 4 | 0.27  | 0.069 | 3.2E-04 |
| O98540 | Lactexin                                                             | 4 | 0.27  | 0.385 | 3.7E-02 |
| Q11642 | Four and a half LIM domain protein 1                                 | 3 | 0.27  | 0.180 | 1.6E-02 |
| P08160 | Basement membrane-specific heparan sulfate proteoglycan core protein | 5 | 0.26  | 0.169 | 1.4E-03 |
| O43301 | Heat shock 70 kDa protein 1ZA                                        | 4 | 0.26  | 0.054 | 1.4E-04 |
| P02549 | Spectrin alpha chain, erythrocytic 1                                 | 5 | 0.26  | 0.246 | 8.2E-03 |
| O43491 | Band 4.1-like protein 2                                              | 5 | 0.25  | 0.170 | 1.3E-03 |
| P17661 | Desmin                                                               | 3 | 0.25  | 0.194 | 1.4E-02 |
| Q14624 | Inter-alpha-trypsin inhibitor heavy chain H4                         | 3 | 0.25  | 0.211 | 2.3E-02 |
| P80723 | Brain acid soluble protein 1                                         | 5 | 0.25  | 0.181 | 1.6E-03 |
| Q14699 | Raffin                                                               | 3 | 0.25  | 0.143 | 1.0E-02 |
| P46921 | Microtubule-associated protein 1B                                    | 5 | 0.25  | 0.441 | 1.0E-02 |
| P11047 | Laminin subunit gamma-1                                              | 5 | 0.25  | 0.206 | 2.4E-03 |
| P01167 | Cytochrome b5                                                        | 5 | 0.24  | 0.081 | 8.5E-05 |
| P01008 | Androstenediol                                                       | 5 | 0.24  | 0.367 | 1.6E-02 |
| P11277 | Spectrin beta chain, erythrocytic                                    | 5 | 0.23  | 0.297 | 8.1E-03 |
| Q15363 | Laminin subunit alpha-4                                              | 5 | 0.23  | 0.228 | 3.0E-03 |
| O96XN1 | Asporin                                                              | 4 | 0.23  | 0.351 | 2.5E-02 |
| P04083 | Annexin A1                                                           | 5 | 0.23  | 0.246 | 3.9E-03 |
| Q14112 | Nidogen-2                                                            | 5 | 0.23  | 0.173 | 1.0E-03 |
| O969G5 | Protein kinase C delta-binding protein                               | 4 | 0.23  | 0.193 | 4.5E-03 |
| P96269 | Gamma-glutamyltransferase 5                                          | 5 | 0.22  | 0.169 | 8.8E-04 |
| C09162 | EMILIN-1                                                             | 5 | 0.22  | 0.164 | 8.0E-04 |
| P02649 | Apolipoprotein E                                                     | 5 | 0.22  | 0.337 | 1.1E-02 |
| P07197 | Neurofilament medium polypeptide                                     | 5 | 0.22  | 0.067 | 2.2E-05 |
| Q04875 | Sorbin and SH3 domain-containing protein 2                           | 5 | 0.22  | 0.107 | 1.4E-04 |
| O16555 | Dihydropyrimidinase-related protein 2                                | 5 | 0.21  | 0.107 | 1.4E-04 |
| P14543 | Nidogen-1                                                            | 5 | 0.188 | 0.188 | 1.2E-03 |
| P06903 | Protein S100-A10                                                     | 5 | 0.21  | 0.090 | 8.5E-05 |
| P22105 | Tenascin-X                                                           | 4 | 0.21  | 0.200 | 4.2E-03 |
| P08366 | Tubulin alpha-4A chain                                               | 3 | 0.21  | 0.133 | 7.5E-03 |
| P07360 | Complement component C8 gamma chain                                  | 4 | 0.20  | 0.194 | 3.7E-03 |
| O12805 | EGF-containing fibulin-like extracellular matrix protein 1           | 4 | 0.20  | 0.335 | 1.7E-02 |
| P02966 | Myosin basic protein                                                 | 5 | 0.20  | 0.110 | 1.3E-04 |
| P38059 | Collagen alpha-1(XV) chain                                           | 5 | 0.19  | 0.216 | 1.6E-03 |
| P11168 | Solute carrier family 2, facilitated glucose transporter member 1    | 5 | 0.18  | 0.280 | 3.7E-03 |
| P08032 | Actin, alpha cardiac muscle 1                                        | 4 | 0.17  | 0.188 | 2.6E-03 |
| P02730 | Band 3 anion transport protein                                       | 5 | 0.17  | 0.391 | 1.1E-02 |
| P05188 | Alkaline phosphatase, tissue-nonspecific isozyme                     | 5 | 0.17  | 0.185 | 6.0E-04 |
| P58166 | Inhibin beta E chain                                                 | 5 | 0.17  | 0.196 | 8.0E-04 |
| O00707 | Collagen alpha-1(XIV) chain                                          | 5 | 0.17  | 0.180 | 5.7E-04 |
| P04275 | von Willebrand factor                                                | 5 | 0.17  | 0.138 | 2.0E-04 |
| P43520 | Beta-crystallin B2                                                   | 4 | 0.16  | 0.076 | 1.6E-04 |
| Q13885 | Tubulin beta-2A chain                                                | 3 | 0.16  | 0.334 | 3.2E-02 |
| Q14495 | Lipid phosphate phosphohydrolase 3                                   | 4 | 0.16  | 0.170 | 1.7E-03 |
| Q03135 | Caveolin-1                                                           | 5 | 0.16  | 0.240 | 1.6E-03 |
| P02760 | Protein AMBP                                                         | 5 | 0.16  | 0.081 | 2.1E-05 |
| Q15661 | Tryptase alpha/beta-1                                                | 5 | 0.15  | 0.154 | 0.7E-04 |
| Q2U109 | Collagen alpha-1(XCVIII) chain                                       | 3 | 0.15  | 0.246 | 1.7E-02 |
| P01871 | Ig mu chain C region                                                 | 5 | 0.15  | 0.272 | 2.2E-03 |
| O96XMO | Fetuin                                                               | 5 | 0.15  | 0.202 | 7.1E-04 |
| P01031 | Complement C5                                                        | 5 | 0.15  | 0.287 | 2.0E-03 |
| P20774 | Nitrican                                                             | 5 | 0.15  | 0.161 | 2.4E-05 |
| O9L6X5 | Fibulin-5                                                            | 5 | 0.15  | 0.280 | 5.1E-03 |
| P35749 | Myosin-11                                                            | 5 | 0.14  | 0.089 | 2.6E-05 |
| Q24844 | Myosin regulatory light polypeptide 9                                | 5 | 0.14  | 0.115 | 7.0E-05 |
| Q14195 | Dihydropyrimidinase-related protein 3                                | 5 | 0.13  | 0.084 | 1.9E-05 |
| P21980 | Protein-glutamine gamma-glutamyltransferase 2                        | 5 | 0.13  | 0.129 | 8.7E-05 |
| P21810 | Blygcan                                                              | 5 | 0.13  | 0.169 | 2.0E-04 |
| P51884 | Lumican                                                              | 5 | 0.13  | 0.178 | 3.3E-04 |
| P36555 | Fibrin-1                                                             | 5 | 0.13  | 0.226 | 8.3E-04 |
| P21926 | C99 antigen                                                          | 5 | 0.13  | 0.245 | 1.1E-03 |
| O16853 | Membrane primary amine oxidase                                       | 4 | 0.12  | 0.077 | 1.1E-04 |
| P15909 | Claudin-1                                                            | 5 | 0.12  | 0.235 | 8.5E-04 |
| P51888 | Protargin                                                            | 5 | 0.12  | 0.129 | 7.9E-05 |
| P41219 | Perlecan                                                             | 5 | 0.12  | 0.118 | 5.5E-05 |
| P08123 | Collagen alpha-2(I) chain                                            | 5 | 0.12  | 0.483 | 1.1E-02 |
| P07585 | Decorin                                                              | 5 | 0.11  | 0.183 | 3.5E-04 |
| P22352 | Glutathione peroxidase 3                                             | 5 | 0.11  | 0.283 | 1.1E-03 |
| P15588 | Mast cell carboxypeptidase A                                         | 5 | 0.11  | 0.113 | 3.8E-05 |
| P35625 | Metalloproteinase inhibitor 3                                        | 5 | 0.10  | 0.226 | 5.6E-04 |
| P02748 | Complement component C9                                              | 5 | 0.10  | 0.202 | 3.5E-04 |
| P04024 | Vitreosin                                                            | 5 | 0.10  | 0.341 | 2.9E-03 |
| P22748 | Carbonic anhydrase 4                                                 | 5 | 0.09  | 0.117 | 3.5E-05 |
| P22946 | Crymase                                                              | 5 | 0.09  | 0.253 | 6.9E-04 |
| P10745 | Retinol-binding protein 3                                            | 4 | 0.08  | 0.269 | 2.4E-03 |
| P25189 | Myelin protein P0                                                    | 5 | 0.07  | 0.139 | 4.8E-05 |
| P63211 | Guanine nucleotide-binding protein G(T) subunit gamma-T1             | 3 | 0.07  | 0.184 | 4.4E-03 |
| P02743 | Serum amyloid P-component                                            | 5 | 0.07  | 0.267 | 5.6E-04 |

Average LC-MS/MS ITRAQ results from metastasized UM 19, 21, 24, 28, 30. Brown denotes change  $\geq 2$  standard deviations (SD) from the mean, yellow denotes change  $\geq 1$  SD and green highlights p values  $\leq 0.05$ . NA, not applicable, n=3 samples.
