# Supplementary material for: iTRAQ Quantitative Proteomic Comparison of Metastatic and Non-Metastatic Uveal Melanoma Tumors
Source: PubMed Central journal article supplement (PMC4549237; doi:10.1371/journal.pone.0135543), 2015-08-25
Supplement: pone.0135543.s017.pdf [file pone.0135543.s017.pdf]

Supplementary Table S17

Average Relative Protein Abundance: Non-Metastatic Tumors (Samples UM15, UM20, UM23, UM25, UM26)

log<sub>2</sub> (mean Quantified + 1) vs. Log<sub>2</sub>(mean Protein Ratio + 1). Log<sub>2</sub>(mean Protein Ratio + 1). Standard Deviation = 0.15

| Uni-Prot Accession | Protein                                                              | Sample Frequency n = 5, total | Ratio UM/Control | SEM   | p value |
|--------------------|----------------------------------------------------------------------|-------------------------------|------------------|-------|---------|
| P62367             | Peptidyl prolyl cis-trans isomerase A                                | 5                             | 5.18             | 0.071 | 2.0E-05 |
| P30086             | Phosphoglycolactaminate binding protein 1                            | 5                             | 4.46             | 0.113 | 1.9E-04 |
| O75368             | SH3 domain-binding glutamic acid-rich-like protein                   | 3                             | 4.38             | 0.276 | 3.3E-02 |
| P17096             | High mobility group protein HMG-I/HMG-Y                              | 5                             | 4.16             | 0.198 | 2.0E-03 |
| P08454             | Prothymosin alpha                                                    | 5                             | 4.08             | 0.297 | 9.1E-03 |
| P07108             | Acyl-CoA-binding protein                                             | 5                             | 3.89             | 0.131 | 4.9E-04 |
| P18402             | Histone H1.3                                                         | 3                             | 3.85             | 0.200 | 2.1E-02 |
| P78417             | Glutathione S-transferase omega-1                                    | 3                             | 3.60             | 0.020 | 1.9E-07 |
| P07195             | L-lactate dehydrogenase B chain                                      | 5                             | 3.51             | 0.066 | 4.4E-05 |
| O14566             | Glycerate(1,3)-phosphate dehydrogenase, testis-specific              | 5                             | 3.49             | 0.214 | 4.2E-03 |
| P63241             | Eukaryotic translation initiation factor 4A-1                        | 5                             | 3.47             | 0.154 | 4.3E-04 |
| Q04740             | Lactoyglutathione lyase                                              | 5                             | 3.46             | 0.167 | 1.7E-03 |
| P24841             | Cyclin-dependent kinase 2                                            | 4                             | 3.46             | 0.047 | 1.2E-04 |
| P10599             | Thioredoxin                                                          | 5                             | 3.45             | 0.219 | 4.4E-03 |
| P00338             | L-lactate dehydrogenase A chain                                      | 5                             | 3.40             | 0.156 | 1.4E-03 |
| P01174             | Triosephosphate isomerase                                            | 5                             | 3.38             | 0.105 | 3.1E-04 |
| P09211             | Glutathione S-transferase P                                          | 5                             | 3.29             | 0.198 | 3.9E-03 |
| P08546             | Myotrophin                                                           | 3                             | 3.25             | 0.096 | 6.9E-03 |
| P00568             | Phosphoglycerate kinase 1                                            | 5                             | 3.17             | 0.052 | 2.4E-04 |
| P06733             | Alpha-enolase                                                        | 5                             | 3.11             | 0.078 | 1.3E-04 |
| Q18658             | Fascin                                                               | 3                             | 3.11             | 0.075 | 4.4E-03 |
| Q07622             | LaminA-cryotallin homolog                                            | 5                             | 3.10             | 0.133 | 1.1E-03 |
| Q8HC38             | Glyoxalase domain-containing protein 4                               | 4                             | 3.10             | 0.200 | 1.1E-02 |
| P04060             | Cytidin-5                                                            | 5                             | 3.03             | 0.004 | 6.6E-05 |
| P13139             | Bifunctional purine biosynthesis protein PURH                        | 4                             | 3.01             | 0.199 | 1.2E-02 |
| P22087             | mRNA 2'-O-methyltransferase forlamin                                 | 5                             | 2.99             | 0.104 | 4.0E-04 |
| P04406             | Glycerate(1,3)-phosphate dehydrogenase                               | 5                             | 2.97             | 0.166 | 2.8E-03 |
| O75348             | V-type proton ATPase subunit G 1                                     | 3                             | 2.96             | 0.233 | 4.3E-02 |
| P15121             | Aldose reductase                                                     | 4                             | 2.95             | 0.188 | 1.0E-02 |
| P12955             | Xaa-Pro dipeptidase                                                  | 4                             | 2.95             | 0.121 | 2.6E-03 |
| O75347             | Tubulin-specific chaperone A                                         | 4                             | 2.94             | 0.074 | 7.0E-04 |
| P02565             | Rho GDP-dissociation inhibitor 1                                     | 5                             | 2.88             | 0.105 | 5.4E-04 |
| P00443             | Facin reductase [NADPH]                                              | 5                             | 2.87             | 0.053 | 2.0E-03 |
| P06865             | Beta-hexosaminidase subunit alpha                                    | 3                             | 2.87             | 0.128 | 1.4E-02 |
| P01804             | 10 kDa heat shock protein, mitochondrial                             | 5                             | 2.81             | 0.202 | 6.9E-03 |
| P19338             | Nucleolin                                                            | 3                             | 2.77             | 0.095 | 3.9E-04 |
| P18070             | CD44 antigen                                                         | 5                             | 2.74             | 0.128 | 1.4E-03 |
| Q15819             | Ubiquitin-conjugating enzyme E2 variant 2                            | 3                             | 2.72             | 0.114 | 1.3E-02 |
| P16401             | Histone H1.5                                                         | 5                             | 2.70             | 0.152 | 6.7E-03 |
| O15400             | Syntaxin 7                                                           | 5                             | 2.69             | 0.157 | 3.2E-03 |
| P29421             | Transketolase                                                        | 5                             | 2.69             | 0.024 | 3.1E-06 |
| P07900             | Heat shock protein HSP 90-alpha                                      | 5                             | 2.64             | 0.148 | 2.9E-03 |
| P13797             | Plastin-3                                                            | 4                             | 2.61             | 0.126 | 4.7E-03 |
| P15531             | Nucleoside diphosphate kinase A                                      | 5                             | 2.60             | 0.162 | 4.7E-03 |
| Q9Y2X3             | Nucleolar protein 58                                                 | 4                             | 2.59             | 0.065 | 6.8E-04 |
| P40925             | Maltate dehydrogenase, cytoplasmic                                   | 5                             | 2.58             | 0.055 | 6.9E-05 |
| P07741             | Adenosine phosphoribosyltransferase                                  | 3                             | 2.57             | 0.062 | 7.6E-03 |
| P13489             | Ribonuclease inhibitor                                               | 3                             | 2.56             | 0.129 | 1.8E-02 |
| O03796             | Sorbitol dehydrogenase                                               | 4                             | 2.56             | 0.041 | 1.9E-04 |
| P31948             | Stress-induced phosphoprotein 1                                      | 5                             | 2.54             | 0.112 | 1.1E-03 |
| O59534             | Ectoderm micubulin-associated protein-like 2                         | 3                             | 2.53             | 0.215 | 5.0E-02 |
| P18588             | Hesparin-derived growth factor                                       | 5                             | 2.52             | 0.158 | 4.2E-03 |
| P63104             | 14-3-3 protein zeta/delta                                            | 5                             | 2.52             | 0.145 | 3.1E-03 |
| P07729             | Ras-related protein Rab-38                                           | 4                             | 2.51             | 0.119 | 4.4E-03 |
| P40926             | Maltate dehydrogenase, mitochondrial                                 | 5                             | 2.49             | 0.045 | 3.3E-03 |
| P62760             | 60S ribosomal protein L23a                                           | 4                             | 2.45             | 0.084 | 1.7E-03 |
| Q13510             | Acid ceramidase                                                      | 5                             | 2.42             | 0.153 | 4.4E-03 |
| Q93338             | 6-phosphogluconolactonase                                            | 5                             | 2.41             | 0.063 | 1.6E-04 |
| Q99497             | Protein DJ-1                                                         | 5                             | 2.35             | 0.058 | 1.2E-04 |
| Q03E16             | Programmed cell death protein 4                                      | 4                             | 2.35             | 0.190 | 2.0E-02 |
| P07954             | Fumarate hydratase, mitochondrial                                    | 4                             | 2.34             | 0.094 | 2.0E-03 |
| P61149             | Ras-related protein Rab-7a                                           | 5                             | 2.33             | 0.069 | 2.6E-04 |
| P08758             | Annexin A6                                                           | 5                             | 2.30             | 0.128 | 2.9E-03 |
| P62628             | GTP-binding nuclear protein Ran                                      | 4                             | 2.29             | 0.165 | 1.5E-02 |
| P23526             | Adenosylhomocysteinase                                               | 5                             | 2.28             | 0.092 | 8.5E-04 |
| Q96217             | Fumarylacetoacetate hydrolase domain-containing protein 2A           | 3                             | 2.27             | 0.115 | 1.9E-02 |
| P07737             | Profilin-1                                                           | 5                             | 2.26             | 0.077 | 4.4E-04 |
| P23528             | Cofilin-1                                                            | 5                             | 2.26             | 0.064 | 2.2E-04 |
| P07448             | Nucleophosmin                                                        | 5                             | 2.25             | 0.038 | 3.1E-05 |
| P08238             | Heat shock protein HSP 90-beta                                       | 5                             | 2.24             | 0.165 | 8.1E-03 |
| Q13185             | Chromobox protein homolog 3                                          | 5                             | 2.23             | 0.085 | 7.0E-04 |
| P00462             | Eukaryotic translation initiation factor 2 subunit 2                 | 5                             | 2.23             | 0.197 | 2.1E-02 |
| P18152             | Carbonyl reductase [NADPH] 1                                         | 5                             | 2.21             | 0.129 | 3.5E-03 |
| Q13126             | S-methyl-5-thioadenosine phosphorylase                               | 3                             | 2.20             | 0.117 | 2.1E-02 |
| P08744             | Glucose-6-phosphate isomerase                                        | 5                             | 2.20             | 0.091 | 9.1E-04 |
| P21283             | V-type proton ATPase subunit C 1                                     | 3                             | 2.19             | 0.103 | 1.7E-02 |
| Q13838             | Spliceosome RNA helicase DDX39B                                      | 4                             | 2.19             | 0.081 | 3.2E-03 |
| P30044             | Peroxiredoxin-5, mitochondrial                                       | 5                             | 2.18             | 0.088 | 9.1E-04 |
| Q07955             | Serine/arginine-rich splicing factor 1                               | 5                             | 2.17             | 0.070 | 3.9E-04 |
| P11474             | Macrophage migration inhibitory factor                               | 5                             | 15.28            | NA    | NA      |
| P05204             | Non-Histone chromosomal protein HMG-17                               | 1                             | 7.97             | NA    | NA      |
| Q06256             | Small ubiquitin-related modifier 4                                   | 1                             | 5.69             | NA    | NA      |
| O9H305             | Pinin                                                                | 1                             | 5.29             | NA    | NA      |
| Q9H305             | Probable serine carboxypeptidase CPVL                                | 1                             | 4.99             | NA    | NA      |
| Q91603             | Adverin                                                              | 1                             | 4.47             | NA    | NA      |
| P52769             | NH2-like protein 1                                                   | 1                             | 4.40             | NA    | NA      |
| Q0UBR2             | Cathepsin Z                                                          | 2                             | 4.37             | NA    | NA      |
| P63238             | Thyrosinase beta-4                                                   | 2                             | 4.33             | NA    | NA      |
| Q8WMM9             | Cytoglobin                                                           | 1                             | 3.94             | NA    | NA      |
| O60220             | Mitochondrial import inner membrane translocase subunit TimA         | 1                             | 3.85             | NA    | NA      |
| P13686             | Tartrate-resistant acid phosphatase type 5                           | 1                             | 3.84             | NA    | NA      |
| O8NCW5             | NAD(P)H hydride epimerase                                            | 1                             | 3.82             | NA    | NA      |
| Q0XQW6             | Nicotinate phosphoribosyltransferase                                 | 1                             | 3.71             | NA    | NA      |
| P22234             | Multifunctional protein AD22                                         | 1                             | 3.71             | NA    | NA      |
| P62310             | U6 snRNA-associated Sm-like protein LSM3                             | 1                             | 3.68             | NA    | NA      |
| P40121             | Macrophage capping protein                                           | 2                             | 3.61             | NA    | NA      |
| P43205             | Cathepsin K                                                          | 1                             | 3.63             | NA    | NA      |
| P16083             | Ribosylthiazolinediamide dehydrogenase [quinone]                     | 1                             | 3.47             | NA    | NA      |
| Q06888             | Protein CUBA                                                         | 1                             | 3.46             | NA    | NA      |
| Q9UHQ6             | LIM domain and actin-binding protein 1                               | 1                             | 3.26             | NA    | NA      |
| O00584             | Ribonuclease T2                                                      | 1                             | 3.12             | NA    | NA      |
| P20059             | HLA class II histocompatibility antigen, DRB1-11 beta chain          | 1                             | 3.07             | NA    | NA      |
| P61916             | Epidermal secretory protein E1                                       | 1                             | 3.01             | NA    | NA      |
| P63270             | Septaplatin reductase                                                | 1                             | 2.86             | NA    | NA      |
| P03463             | Protein SET5P                                                        | 2                             | 2.83             | NA    | NA      |
| P27895             | DNA (apurinic or apyrimidinic site) lyase                            | 2                             | 2.80             | NA    | NA      |
| Q8IV08             | Phosphoglucone D3                                                    | 4                             | 2.78             | 0.359 | 6.5E-02 |
| P05413             | Fatty acid-binding protein, heart                                    | 2                             | 2.76             | NA    | NA      |
| P23297             | Protein S100-A1                                                      | 1                             | 2.73             | NA    | NA      |
| P62979             | SAP domain-containing ribonuclease                                   | 1                             | 2.73             | NA    | NA      |
| P11796             | Alcohol dehydrogenase class 3                                        | 1                             | 2.71             | NA    | NA      |
| P17900             | Ganglioside GM2 activator                                            | 1                             | 2.71             | NA    | NA      |
| P25789             | Proteasome subunit alpha type-4                                      | 1                             | 2.70             | NA    | NA      |
| Q9RHL4             | Dipeptidyl peptidase 2                                               | 1                             | 2.65             | NA    | NA      |
| P16949             | Stathmin                                                             | 2                             | 2.63             | NA    | NA      |
| Q8EUP0             | EF-hand domain-containing protein D1                                 | 2                             | 2.63             | NA    | NA      |
| P52566             | Rho GDP-dissociation inhibitor 2                                     | 1                             | 2.63             | NA    | NA      |
| Q8HR04             | Haloacid dehalogenase-like hydrolase domain-containing protein 2     | 1                             | 2.62             | NA    | NA      |
| Q8EY78             | Neuroxin, mitochondrial                                              | 1                             | 2.68             | NA    | NA      |
| P07886             | Beta-hexosaminidase subunit beta                                     | 2                             | 2.58             | NA    | NA      |
| Q96972             | P2X purinocceptor 7                                                  | 2                             | 2.57             | NA    | NA      |
| P30748             | Flap endonuclease 1                                                  | 1                             | 2.55             | NA    | NA      |
| P36959             | GMP reductase 1                                                      | 1                             | 2.52             | NA    | NA      |
| P30085             | UMP-CMP kinase                                                       | 1                             | 2.50             | NA    | NA      |
| Q8EV36             | Melanophilin                                                         | 2                             | 2.49             | NA    | NA      |
| P23381             | Tryptophan-5 RNA ligase, cytoplasmic                                 | 2                             | 2.49             | NA    | NA      |
| P55010             | Eukaryotic translation initiation factor 5                           | 1                             | 2.48             | NA    | NA      |
| Q8NR28             | Diablo homolog, mitochondrial                                        | 1                             | 2.48             | NA    | NA      |
| P16930             | Fumarylacetoacetate                                                  | 1                             | 2.48             | NA    | NA      |
| Q13243             | Serine/arginine-rich splicing factor 5                               | 2                             | 2.47             | NA    | NA      |
| Q5NJ25             | Putative 40S ribosomal protein S26-like 1                            | 2                             | 2.44             | NA    | NA      |
| Q6A045             | V-type proton ATPase subunit E 2                                     | 1                             | 2.42             | NA    | NA      |
| Q8H307             | Pinin                                                                | 1                             | 2.41             | NA    | NA      |
| P49189             | 4-methylaminobutyraldehyde dehydrogenase                             | 1                             | 2.34             | NA    | NA      |
| Q02025             | Setoperonin H                                                        | 2                             | 2.33             | NA    | NA      |
| P02691             | Interferon-induced GTP-binding protein Mx1                           | 2                             | 2.32             | NA    | NA      |
| P65809             | Succinyl-CoA:3-oxoacid coenzyme A transferase 1, mitochondrial       | 2                             | 2.32             | NA    | NA      |
| Q53184             | Aminoacylase-1                                                       | 2                             | 2.29             | NA    | NA      |
| O75531             | Barrier-to-autophagy factor                                          | 2                             | 2.26             | NA    | NA      |
| P21291             | Cysteine and glycine-rich protein 1                                  | 2                             | 2.26             | NA    | NA      |
| Q15185             | Prostaglandin H synthase 3                                           | 1                             | 2.25             | NA    | NA      |
| O14618             | Copper chaperone for superoxide dismutase                            | 1                             | 2.24             | NA    | NA      |
| Q07021             | Complement component 1 Q subcomponent-binding protein, mitochondrial | 1                             | 2.22             | NA    | NA      |
| P10568             | Adenylylase isoenzyme 1                                              | 1                             | 2.22             | NA    | NA      |
| P62861             | 40S ribosomal protein S30                                            | 1                             | 2.21             | NA    | NA      |
| P62815             | 39S ribosomal protein L12, mitochondrial                             | 3                             | 2.20             | 0.236 | 7.9E-02 |
| Q8A132             | Sarcosine dehydrogenase, mitochondrial                               | 1                             | 2.18             | NA    | NA      |
| P10253             | Lysosomal alpha-glucosidase 1                                        | 1                             | 2.18             | NA    | NA      |
| Q8NWF8             | Bo1-2-associated transcription factor 1                              | 2                             | 2.18             | NA    | NA      |
| P10708             | S-formylglutathione hydrolase                                        | 2                             | 2.15             | NA    | NA      |
| Q85974             | Protein FAM31A1                                                      | 1                             | 2.15             | NA    | NA      |
| Q15162             | Platelet activating factor acetylhydrolase II subunit gamma          | 3                             | 2.15             | 0.291 | 1.1E-01 |
| Q8NRX4             | 14 kDa phosphatidylserine phosphatase                                | 1                             | 2.13             | NA    | NA      |
| P63279             | SUMO-conjugating enzyme UBC9                                         | 2                             | 2.13             | NA    | NA      |
| P13788             | Acylamino acid-releasing factor                                      | 2                             | 2.11             | 0.062 | 6.9E-03 |
| Q14677             | Ctshrin interactor 1                                                 | 2                             | 2.11             | NA    | NA      |
| Q8NFC3             | Acy-coenzyme A thioesterase 13                                       | 1                             | 2.11             | NA    | NA      |
| P00460             | Endoplasmic reticulum resident protein 29                            | 1                             | 2.10             | NA    | NA      |
| P01620             | Ig kappa chain V.H1 region SIE                                       | 1                             | 2.08             | NA    | NA      |
| P08670             | Vimentin                                                             | 5                             | 2.07             | 0.208 | 2.5E-02 |
| Q97229             | Heterogeneous nuclear ribonucleoprotein AB                           | 5                             | 2.07             | NA    | NA      |
| P12081             | Histidine-4 RNA ligase, cytoplasmic                                  | 1                             | 2.06             | NA    | NA      |
| P51088             | Ubiquitin-conjugating enzyme E2 N                                    | 2                             | 2.06             | NA    | NA      |
| P03095             | Ras GDP-dissociation inhibitor beta                                  | 5                             | 2.06             | 0.063 | 3.3E-04 |
| P02788             | Serum albumin                                                        | 5                             | 2.05             | 0.195 | 2.1E-02 |
| P26072             | Proteasome subunit beta type-6                                       | 1                             | 2.05             | NA    | NA      |
| Q04837             | Single-stranded DNA-binding protein, mitochondrial                   | 1                             | 2.05             | NA    | NA      |
| P63173             | 60S ribosomal protein L38                                            | 1                             | 2.03             | NA    | NA      |
| Q00069             | Transcription factor A, mitochondrial                                | 5                             | 2.03             | 0.160 | 1.7E-02 |
| P08195             | 4F2 cell-surface antigen heavy chain                                 | 5                             | 2.03             | 0.066 | 4.3E-04 |
| Q35Y09             | Mitochondrial 10-formyltetrahydrofolate dehydrogenase                | 2                             | 2.03             | NA    | NA      |
| Q8A050             | Glyoxylate reductase/hydroxyproprate reductase                       | 1                             | 2.03             | NA    | NA      |
| Q86RA2             | Thioredoxin domain-containing protein 7                              | 3                             | 2.02             | 0.101 | 2.9E-02 |
| Q86506             | Synaptic vesicle membrane protein VAMP1 homolog                      | 5                             | 2.02             | 0.038 | 5.3E-05 |
| P12096             | Glutathione S-transferase Mu 3                                       | 4                             | 2.02             | 0.129 | 2.0E-02 |
| Q04446             | 1,4-alpha-glucan branching enzyme                                    | 2                             | 2.00             | NA    | NA      |
| Q86W46             | Valacyclovir hydrolase                                               | 1                             | 2.00             | NA    | NA      |
| Q8UHE5             | Switch-associated protein 70                                         | 5                             | 2.00             | 0.090 | 1.6E-03 |
| Q15843             | NEEDD8                                                               | 1                             | 1.99             | NA    | NA      |
| P05453             | Serpin B9                                                            | 1                             | 1.99             | 0.172 | 5.7E-02 |
| Q01105             | Protein SET                                                          | 3                             | 1.98             | 0.041 | 3.7E-03 |

Table S17 Average Non-Metastatic Tumors

|        |                                                                            |   |      |       |         |
|--------|----------------------------------------------------------------------------|---|------|-------|---------|
| Q13442 | 28 kDa heat- and acid-stable phosphoprotein                                | 2 | 1.98 | NA    | NA      |
| P52786 | Proteasome subunit alpha type-1                                            | 5 | 1.98 | 0.131 | 6.5E-03 |
| Q6P448 | Aspartate-tRNA ligase, mitochondrial                                       | 2 | 1.98 | NA    | NA      |
| Q9JL12 | V-type proton ATPase subunit H                                             | 1 | 1.97 | NA    | NA      |
| P53685 | Monocarboxylate transporter 1                                              | 1 | 1.97 | NA    | NA      |
| P09914 | Interferon-induced protein with tetrahydrocoptide repeats 1                | 1 | 1.97 | NA    | NA      |
| Q9HA44 | Aminopeptidase B                                                           | 2 | 1.97 | NA    | NA      |
| P22362 | Nucleoside diphosphate kinase B                                            | 1 | 1.96 | NA    | NA      |
| Q14247 | Src substrate cortactin                                                    | 5 | 1.96 | 0.113 | 4.0E-03 |
| Q072V1 | Thyroid hormone receptor-associated protein 3                              | 2 | 1.96 | NA    | NA      |
| P03015 | Carbonic anhydrase 1                                                       | 1 | 1.95 | NA    | NA      |
| P38159 | RNA-binding motif protein, X chromosome                                    | 1 | 1.95 | NA    | NA      |
| P13663 | Translationally controlled tumor protein                                   | 4 | 1.94 | 0.079 | 3.6E-03 |
| P20618 | Proteasome subunit beta type-1                                             | 4 | 1.94 | 0.040 | 4.8E-04 |
| P16219 | Short-chain specific acyl-CoA dehydrogenase, mitochondrial                 | 3 | 1.93 | 0.273 | 1.4E-01 |
| Q14240 | Eukaryotic initiation factor 4A-II                                         | 3 | 1.93 | 0.058 | 7.8E-03 |
| P62847 | 40S ribosomal protein S24                                                  | 1 | 1.92 | NA    | NA      |
| P27348 | 14-3-3 protein theta                                                       | 4 | 1.92 | 0.171 | 3.2E-02 |
| Q29255 | Phenylalanine--tRNA ligase alpha subunit                                   | 1 | 1.91 | NA    | NA      |
| P33121 | Long-chain-fatty-acid--CoA ligase 1                                        | 1 | 1.91 | NA    | NA      |
| P62258 | 14-3-3 protein epsilon                                                     | 5 | 1.91 | 0.094 | 2.3E-03 |
| Q89C96 | mTDPK1 diaphanase                                                          | 2 | 1.91 | NA    | NA      |
| Q18636 | Hydroxyacyl-coenzyme A dehydrogenase, mitochondrial                        | 4 | 1.90 | 0.142 | 2.0E-02 |
| P09300 | Proteasome subunit alpha type-6                                            | 2 | 1.90 | NA    | NA      |
| P07858 | Cathepsin B                                                                | 4 | 1.89 | 0.227 | 6.7E-02 |
| P30485 | HLA class I histocompatibility antigen, B-47 alpha chain                   | 1 | 1.89 | NA    | NA      |
| Q12906 | Interleukin enhancer-binding factor 3                                      | 5 | 1.89 | 0.079 | 1.6E-03 |
| P18669 | Phosphoglycerate mutase 1                                                  | 5 | 1.88 | 0.069 | 2.1E-03 |
| Q89899 | Succinyl-CoA ligase (GDP-forming) subunit beta, mitochondrial              | 3 | 1.87 | 0.132 | 4.1E-02 |
| Q02117 | NADH dehydrogenase (ubiquinone) iron-sulfur protein 6, mitochondrial       | 1 | 1.87 | NA    | NA      |
| P04181 | O-methyltransferase, mitochondrial                                         | 1 | 1.87 | NA    | NA      |
| Q5W222 | Lysophospholipase-like protein 1                                           | 1 | 1.86 | NA    | NA      |
| Q15907 | Ras-related protein Rab-11B                                                | 4 | 1.86 | 0.140 | 2.4E-02 |
| P31937 | 3-hydroxyisobutyrate dehydrogenase, mitochondrial                          | 2 | 1.85 | NA    | NA      |
| P09999 | Cytochrome c                                                               | 5 | 1.85 | 0.107 | 4.5E-03 |
| P31608 | Methyl CpG-binding protein 2                                               | 1 | 1.85 | 0.151 | 6.9E-02 |
| P48147 | Prolyl endopeptidase                                                       | 1 | 1.85 | NA    | NA      |
| Q8H7C9 | MtS58 domain-containing protein                                            | 1 | 1.85 | NA    | NA      |
| P46776 | 60S ribosomal protein L27a                                                 | 3 | 1.85 | 0.068 | 1.2E-02 |
| P10890 | 60 kDa heat shock protein, mitochondrial                                   | 5 | 1.84 | 0.133 | 1.0E-02 |
| Q8U260 | Proliferation-associated protein 2G4                                       | 3 | 1.83 | 0.083 | 1.8E-02 |
| Q15631 | Transin                                                                    | 4 | 1.83 | 0.200 | 5.6E-02 |
| Q15181 | Inorganic pyrophosphatase                                                  | 3 | 1.83 | 0.051 | 6.9E-03 |
| Q13435 | Splicing factor 3B subunit 2                                               | 5 | 1.83 | 0.127 | 9.0E-03 |
| Q04917 | 14-3-3 protein eta                                                         | 1 | 1.83 | NA    | NA      |
| Q9Y3C8 | Ubiquitin-fold modifier-conjugating enzyme 1                               | 2 | 1.83 | NA    | NA      |
| Q70621 | Ribosomal L1 domain-containing protein 1                                   | 1 | 1.83 | NA    | NA      |
| P04441 | Superoxide dismutase [Cu-Zn]                                               | 5 | 1.83 | 0.184 | 3.1E-02 |
| Q9Y4W6 | AFG3-like protein 2                                                        | 5 | 1.82 | 0.100 | 3.9E-03 |
| O05657 | Nucleolar protein 56                                                       | 1 | 1.82 | 0.050 | 2.8E-04 |
| Q6UB05 | Eukaryotic translation initiation factor 3 subunit K                       | 1 | 1.82 | NA    | NA      |
| P64077 | ADP-ribosylation factor 1                                                  | 1 | 1.81 | NA    | NA      |
| Q9Y653 | G-protein coupled receptor 56                                              | 1 | 1.81 | NA    | NA      |
| P09842 | Eukaryotic initiation factor 4A-I                                          | 4 | 1.81 | 0.023 | 1.3E-04 |
| Q13428 | Tricase protein                                                            | 2 | 1.81 | NA    | NA      |
| P08821 | U1 small nuclear ribonucleoprotein 70 kDa                                  | 2 | 1.80 | NA    | NA      |
| Q43399 | Tumor protein D54                                                          | 4 | 1.80 | 0.137 | 2.3E-02 |
| P33969 | Activated RNA polymerase II transcriptional coactivator p15                | 1 | 1.80 | NA    | NA      |
| P49720 | Proteasome subunit beta type-3                                             | 1 | 1.79 | NA    | NA      |
| Q14103 | Heterogeneous nuclear ribonucleoprotein D0                                 | 5 | 1.79 | 0.016 | 5.2E-06 |
| Q12905 | Interleukin enhancer-binding factor 2                                      | 5 | 1.78 | 0.069 | 6.9E-04 |
| P14818 | Pyruvate kinase PKM                                                        | 5 | 1.77 | 0.115 | 7.7E-03 |
| P65141 | ADP-ATP translocase 2                                                      | 3 | 1.77 | 0.223 | 1.2E-01 |
| P13639 | Elongation factor 2                                                        | 5 | 1.77 | 0.057 | 5.4E-04 |
| P20702 | Integrin alpha-X                                                           | 1 | 1.77 | NA    | NA      |
| P07910 | Heterogeneous nuclear ribonucleoproteins C1/C2                             | 5 | 1.77 | 0.007 | 1.0E-03 |
| Q15424 | Scaffold attachment factor B1                                              | 1 | 1.76 | NA    | NA      |
| Q13819 | Cullin-4A                                                                  | 1 | 1.76 | NA    | NA      |
| Q8HW47 | Ataxin-2-like protein                                                      | 1 | 1.75 | NA    | NA      |
| P30637 | Aldehyde dehydrogenase X, mitochondrial                                    | 5 | 1.75 | 0.288 | 1.2E-01 |
| P46926 | Glucosamine-6-phosphate isomerase 1                                        | 4 | 1.75 | 0.105 | 1.3E-02 |
| Q8Y112 | HACA ribonucleoprotein complex subunit 1                                   | 1 | 1.75 | 0.066 | 6.9E-03 |
| Q62597 | Protein NDRG1                                                              | 3 | 1.75 | 0.043 | 5.7E-03 |
| P48729 | Phosphatidylinositol transfer protein beta isoform                         | 1 | 1.75 | NA    | NA      |
| P07877 | Serotransferrin                                                            | 1 | 1.75 | 0.161 | 2.6E-02 |
| P25788 | Proteasome subunit alpha type-3                                            | 2 | 1.75 | NA    | NA      |
| Q8L446 | Proteasome activator complex subunit 2                                     | 2 | 1.74 | NA    | NA      |
| Q14818 | Proteasome subunit alpha type-7                                            | 5 | 1.74 | 0.116 | 8.6E-03 |
| Q75380 | NADH dehydrogenase (ubiquinone) iron-sulfur protein 6, mitochondrial       | 3 | 1.74 | 0.052 | 8.6E-03 |
| Q55571 | Penicillin dehydrogenase ETH1, mitochondrial                               | 1 | 1.74 | NA    | NA      |
| P35237 | Serpin B6                                                                  | 1 | 1.73 | NA    | NA      |
| Q6JN70 | Protein kinase C and casein kinase substrate in neurons protein 2          | 2 | 1.73 | NA    | NA      |
| P48763 | 40S ribosomal protein S10                                                  | 3 | 1.73 | 0.133 | 5.4E-02 |
| Q9JHX1 | Poly(U)-binding-splicing factor PUF80                                      | 4 | 1.73 | 0.098 | 1.2E-02 |
| Q14841 | 5-oxoprolinase                                                             | 1 | 1.72 | NA    | NA      |
| P38646 | Stress 70 protein, mitochondrial                                           | 1 | 1.72 | 0.134 | 1.5E-02 |
| Q3H462 | Beta-lactamase-like protein 2                                              | 2 | 1.72 | NA    | NA      |
| P55786 | Putromycin-sensitive aminopeptidase                                        | 5 | 1.72 | 0.068 | 1.2E-03 |
| P62867 | 40S ribosomal protein S26                                                  | 3 | 1.71 | 0.144 | 6.5E-02 |
| P09661 | U2 small nuclear ribonucleoprotein A'                                      | 2 | 1.71 | NA    | NA      |
| Q13405 | 39S ribosomal protein L46, mitochondrial                                   | 1 | 1.71 | NA    | NA      |
| P39687 | Acidic leucine-rich nuclear phosphoprotein 32 family member A              | 5 | 1.71 | 0.079 | 2.5E-03 |
| Q689P4 | Cytosolic non-specific dipeptidase                                         | 5 | 1.71 | 0.125 | 1.3E-02 |
| Q01448 | ATP-dependent RNA helicase DDX39A                                          | 4 | 1.70 | NA    | NA      |
| P62158 | Catmodulin                                                                 | 5 | 1.70 | 0.114 | 9.4E-03 |
| Q6JK77 | Protein CDV3 homolog                                                       | 1 | 1.70 | NA    | NA      |
| P48773 | Histidine triad nucleotide-binding protein 1                               | 4 | 1.70 | 0.123 | 2.3E-02 |
| P54819 | Adenylate kinase 2, mitochondrial                                          | 5 | 1.69 | 0.060 | 9.4E-04 |
| Q8YUJ3 | Protein prone homolog 2                                                    | 1 | 1.69 | NA    | NA      |
| P07919 | Cytochrome b-c1 complex subunit 6, mitochondrial                           | 1 | 1.69 | 0.269 | 2.1E-01 |
| P09429 | High mobility group protein B1                                             | 5 | 1.69 | 0.099 | 6.2E-03 |
| Q15436 | Vacuolar protein sorting-associated protein 26A                            | 1 | 1.69 | NA    | NA      |
| Q09039 | Heterogeneous nuclear ribonucleoprotein U                                  | 5 | 1.68 | 0.110 | 9.2E-03 |
| P20405 | Peptidyl prolyl cis-trans isomerase F, mitochondrial                       | 3 | 1.68 | 0.133 | 6.0E-02 |
| Q27655 | Alpha-2-HS-glycoprotein                                                    | 2 | 1.68 | NA    | NA      |
| Q5JY78 | Torsin-1A-interacting protein 1                                            | 4 | 1.68 | 0.058 | 3.0E-03 |
| P21796 | Voltage-dependent anion-selective channel protein 1                        | 5 | 1.67 | 0.076 | 2.4E-03 |
| Q01544 | Cytosolic acyl-coenzyme A thioester hydratase                              | 1 | 1.67 | NA    | NA      |
| P42224 | Signal transducer and activator of transcription 1-alpha/beta              | 1 | 1.67 | NA    | NA      |
| Q62723 | SRP stem-loop-interacting RNA-binding protein, mitochondrial               | 1 | 1.67 | NA    | NA      |
| Q67598 | Acetate hydratase, mitochondrial                                           | 6 | 1.67 | 0.105 | 8.5E-03 |
| P25398 | 40S ribosomal protein S12                                                  | 5 | 1.67 | 0.062 | 1.2E-03 |
| P62766 | Transferin receptor protein                                                | 1 | 1.67 | NA    | NA      |
| P02666 | Proteasome subunit alpha type-5                                            | 3 | 1.67 | 0.140 | 6.8E-02 |
| Q15666 | Gamma interferon-inducible protein 16                                      | 3 | 1.66 | 0.233 | 1.8E-01 |
| Q8JUN2 | NSFL1 cofactor p47                                                         | 2 | 1.66 | NA    | NA      |
| P30041 | Peroxiredoxin-6                                                            | 5 | 1.66 | 0.097 | 6.5E-03 |
| Q00299 | Chloride intracellular channel protein 1                                   | 2 | 1.66 | NA    | NA      |
| Q75484 | Serine/arginine-rich signaling factor 10                                   | 1 | 1.66 | NA    | NA      |
| Q13177 | Serine/threonine-protein kinase PAK 2                                      | 4 | 1.66 | 0.195 | 8.0E-02 |
| EF9AW3 | Nascent polypeptide-associated complex subunit alpha, muscle-specific form | 2 | 1.66 | NA    | NA      |
| Q15533 | Tegasin                                                                    | 1 | 1.66 | NA    | NA      |
| P62820 | Ras-related protein Rab-1A                                                 | 1 | 1.66 | NA    | NA      |
| P63387 | 60S acidic ribosomal protein P2                                            | 5 | 1.65 | 0.067 | 1.7E-03 |
| P31611 | Glutathione S-transferase Mu 2                                             | 1 | 1.65 | NA    | NA      |
| Q89523 | Soritin                                                                    | 2 | 1.65 | NA    | NA      |
| Q85U07 | Feritin family homolog 3                                                   | 6 | 1.65 | 0.057 | 1.3E-02 |
| Q8NS09 | Phenylalanine--tRNA ligase beta subunit                                    | 3 | 1.65 | 0.174 | 1.0E-01 |
| P09651 | Heterogeneous nuclear ribonucleoprotein A1                                 | 5 | 1.65 | 0.054 | 7.5E-04 |
| Q15963 | Perlecan                                                                   | 2 | 1.64 | NA    | NA      |
| Q6UMY4 | Sorting nexin-12                                                           | 2 | 1.64 | NA    | NA      |
| Q64828 | Mitochondrial import receptor subunit TOM70                                | 5 | 1.64 | 0.098 | 7.1E-03 |
| P54952 | Heat shock-related 70 kDa protein 2                                        | 6 | 1.64 | 0.124 | 1.6E-02 |
| Q08380 | Galectin-3-binding protein                                                 | 5 | 1.64 | 0.062 | 1.4E-03 |
| Q8NC21 | Plasminogen activator inhibitor 1 RNA-binding protein                      | 1 | 1.64 | NA    | NA      |
| Q17683 | WD repeat-containing protein 1                                             | 5 | 1.64 | 0.070 | 2.1E-03 |
| Q62820 | Gamma-glutamyl hydrolase                                                   | 2 | 1.64 | NA    | NA      |
| P27636 | 60S ribosomal protein L10                                                  | 3 | 1.64 | 0.122 | 5.6E-02 |
| Q76533 | Splicing factor 3B subunit 1                                               | 3 | 1.64 | 0.062 | 2.7E-02 |
| P27816 | Microtubule-associated protein 4                                           | 5 | 1.63 | 0.119 | 1.5E-02 |
| Q62888 | Acidic leucine-rich nuclear phosphoprotein 32 family member B              | 4 | 1.63 | 0.136 | 3.7E-02 |
| P49753 | Acyl-coenzyme A thioesterase 2, mitochondrial                              | 1 | 1.62 | NA    | NA      |
| P06753 | Topomycin alpha-3 chain                                                    | 5 | 1.62 | 0.105 | 1.0E-02 |
| P04360 | Tubulin beta-4A chain                                                      | 1 | 1.62 | NA    | NA      |
| P12830 | Cadherin-1                                                                 | 3 | 1.62 | 0.118 | 5.3E-02 |
| P09019 | 40S ribosomal protein S19                                                  | 5 | 1.62 | 0.089 | 5.7E-03 |
| Q15371 | Eukaryotic translation initiation factor 3 subunit D                       | 2 | 1.62 | NA    | NA      |
| Q16543 | Hsp90 co-chaperone Cdc37                                                   | 2 | 1.62 | NA    | NA      |
| P51798 | [H+(Cl)-] exchange transporter 7                                           | 1 | 1.61 | NA    | NA      |
| P13929 | Beta-enkephalin                                                            | 1 | 1.61 | NA    | NA      |
| Q86Z71 | Oxysterol-binding protein-related protein 8                                | 1 | 1.61 | NA    | NA      |
| Q9Y163 | Mitochondrial carrier homolog 2                                            | 2 | 1.61 | NA    | NA      |
| P07339 | Cathepsin D                                                                | 5 | 1.61 | 0.344 | 2.4E-01 |
| P22266 | Heterogeneous nuclear ribonucleoproteins A2/B1                             | 5 | 1.61 | 0.047 | 5.4E-04 |
| P10165 | 60 kDa 5S-180 ribonucleoprotein                                            | 1 | 1.61 | NA    | NA      |
| Q8NP98 | Putative phospholipase B-like 2                                            | 1 | 1.61 | NA    | NA      |
| Q16576 | Histone-binding protein RBP7                                               | 2 | 1.60 | NA    | NA      |
| Q84424 | Leucine-rich repeat-containing protein 59                                  | 5 | 1.60 | 0.062 | 1.6E-03 |
| P06737 | Glycogen phosphorylase, liver form                                         | 5 | 1.60 | 0.228 | 1.1E-01 |
| Q8NYL4 | Peptidyl prolyl cis-trans isomerase FKBP11                                 | 1 | 1.60 | NA    | NA      |
| Q12900 | Monocarboxylate ligase ABHD12                                              | 1 | 1.60 | NA    | NA      |
| P55008 | Allograft inflammatory factor 1                                            | 1 | 1.60 | NA    | NA      |
| Q9Y203 | Glutathione S-transferase kappa 1                                          | 1 | 1.59 | NA    | NA      |
| Q11130 | Serine/arginine-rich signaling factor 5                                    | 3 | 1.59 | 0.063 | 1.8E-02 |
| Q60343 | TBC1 domain family member 4                                                | 1 | 1.59 | NA    | NA      |
| Q8H232 | Inorganic pyrophosphatase 2, mitochondrial                                 | 3 | 1.59 | 0.070 | 2.2E-02 |
| Q09845 | FACT complex subunit SSRP1                                                 | 1 | 1.59 | NA    | NA      |
| Q65758 | Polypyrimidine tract-binding protein 3                                     | 1 | 1.59 | NA    | NA      |
| P12270 | Nucleoprotein TFR                                                          | 5 | 1.59 | 0.098 | 9.4E-03 |
| POCV22 | 40S ribosomal protein S17-like                                             | 5 | 1.58 | 0.120 | 1.9E-02 |
| P30042 | EST1 protein homolog, mitochondrial                                        | 3 | 1.58 | 0.231 | 1.9E-01 |
| P36669 | Protein DDK                                                                | 2 | 1.58 | NA    | NA      |
| Q5VTE0 | Putative elongation factor 1-alpha-like 3                                  | 5 | 1.57 | 0.084 | 5.6E-03 |
| Q14157 | Ubiquitin-associated protein 2-like                                        | 1 | 1.57 | NA    | NA      |
| P56613 | Basn1                                                                      | 4 | 1.57 | 0.194 | 1.0E-01 |
| Q9Y371 | Endophilin-B1                                                              | 1 | 1.57 | NA    | NA      |
| P42704 | Leucine-rich FPR motif-containing protein, mitochondrial                   | 5 | 1.57 | 0.080 | 4.6E-03 |
| P62851 | 40S ribosomal protein S25                                                  | 5 | 1.57 | 0.083 | 5.6E-03 |
| P23246 | Splicing factor, proline- and glutamine-rich                               | 5 | 1.57 | 0.111 | 1.5E-02 |
| Q14M03 | Heterogeneous nuclear ribonucleoprotein U-like protein 2                   | 5 | 1.56 | 0.068 | 2.8E-03 |
| P49207 | 60S ribosomal protein L34                                                  | 2 | 1.56 | NA    | NA      |
| P61254 | 60S ribosomal protein L26                                                  | 3 | 1.56 | 0.203 | 1.6E-01 |
| Q9R323 | Proteasome activator complex subunit 1                                     | 6 | 1.56 | 0.096 | 6.9E-03 |
| Q00483 | NADH dehydrogenase (ubiquinone) 1 alpha subcomplex subunit 4               | 4 | 1.56 | 0.075 | 9.9E-03 |
| P62263 | 40S ribosomal protein S14                                                  | 5 | 1.55 | 0.100 | 1.2E-02 |
| P01247 | 40S ribosomal protein S3a                                                  | 5 | 1.55 | 0.107 | 1.5E-02 |
| P78324 | Tyrosine-protein phosphatase non-receptor type substrate 1                 | 1 | 1.55 | NA    | NA      |

Table S17 Average Non-Metastatic Tumors

|        |                                                                                 |   |      |       |         |
|--------|---------------------------------------------------------------------------------|---|------|-------|---------|
| O14979 | Heterogeneous nuclear ribonucleoprotein D-like                                  | 4 | 1.55 | 0.062 | 6.0E-03 |
| P08865 | 40S ribosomal protein S8                                                        | 5 | 1.55 | 0.066 | 1.4E-03 |
| Q8UKV3 | Apoptotic chromatin condensation inducer in the nucleus                         | 4 | 1.55 | 0.075 | 1.0E-02 |
| O15488 | Synaptobrevin homolog YKT6                                                      | 1 | 1.54 | NA    | NA      |
| P42766 | 60S ribosomal protein L35                                                       | 2 | 1.54 | NA    | NA      |
| O43488 | Aflatoxin B1 aldehyde reductase member 2                                        | 1 | 1.54 | NA    | NA      |
| P51991 | Heterogeneous nuclear ribonucleoprotein A3                                      | 5 | 1.54 | 0.091 | 9.3E-03 |
| P19621 | 60S ribosomal protein L17                                                       | 3 | 1.54 | 0.075 | 2.0E-03 |
| P26006 | Integrin alpha-3                                                                | 2 | 1.53 | NA    | NA      |
| P51817 | cAMP-dependent protein kinase catalytic subunit PRKX                            | 1 | 1.53 | NA    | NA      |
| Q13203 | Transcription intermediary factor 1 beta                                        | 3 | 1.53 | 0.184 | 1.0E-01 |
| P17480 | Nuclear transcription factor 1                                                  | 1 | 1.52 | NA    | NA      |
| Q8NFV4 | Alpha-beta hydrolase domain-containing protein 11                               | 4 | 1.52 | 0.159 | 7.7E-02 |
| Q79574 | Isochorate dehydrogenase [NAD(P)] cytoplasmic                                   | 3 | 1.52 | 0.140 | 9.5E-02 |
| P10412 | Histone H1 A                                                                    | 1 | 1.52 | NA    | NA      |
| Q9Y6A8 | NADH dehydrogenase [ubiquinone] 1 beta subcomplex subunit 9                     | 3 | 1.52 | 0.045 | 1.1E-02 |
| P24534 | Elongation factor 1-beta                                                        | 5 | 1.52 | 0.150 | 5.0E-02 |
| A4D19D | WD repeat-containing protein 51                                                 | 1 | 1.51 | NA    | NA      |
| P55155 | Plasma protease C1 inhibitor                                                    | 1 | 1.51 | NA    | NA      |
| Q08211 | ATP-dependent RNA helicase A                                                    | 5 | 1.51 | 0.090 | 1.0E-02 |
| P53597 | Succinyl-CoA ligase (ADP/GDP-forming) subunit alpha, mitochondrial              | 5 | 1.51 | 0.064 | 3.0E-03 |
| P19519 | Lysosomal protease                                                              | 3 | 1.50 | 0.339 | 3.9E-01 |
| P30512 | HLA class I histocompatibility antigen, A-29 alpha chain                        | 1 | 1.50 | NA    | NA      |
| Q8J0J2 | Stomatin-like protein 2, mitochondrial                                          | 4 | 1.50 | 0.179 | 1.1E-01 |
| Q97696 | Chloride intracellular channel protein 4                                        | 2 | 1.49 | NA    | NA      |
| P62906 | 60S ribosomal protein L10a                                                      | 5 | 1.49 | 0.074 | 5.8E-03 |
| Q75400 | PterinRNA-processing factor 40 homolog A                                        | 1 | 1.49 | NA    | NA      |
| Q09210 | Glutamine--fructose-6-phosphate aminotransferase [asomerizing] 1                | 2 | 1.49 | NA    | NA      |
| Q15366 | Poly(C)-binding protein 2                                                       | 2 | 1.49 | NA    | NA      |
| Q9Y376 | Calcium-binding protein 3B                                                      | 1 | 1.48 | NA    | NA      |
| P49792 | E3 SUMO-protein ligase RanBP2                                                   | 2 | 1.48 | NA    | NA      |
| Q75390 | Citrate synthase, mitochondrial                                                 | 5 | 1.48 | 0.112 | 2.5E-02 |
| Q12931 | Heat shock protein 75 kDa, mitochondrial                                        | 1 | 1.48 | NA    | NA      |
| Q69WM7 | Sideroflexin-3                                                                  | 1 | 1.48 | NA    | NA      |
| Q0UKM9 | RNA-binding protein Ray                                                         | 5 | 1.48 | 0.127 | 3.7E-02 |
| Q07960 | Rho GTPase-activating protein 1                                                 | 3 | 1.48 | NA    | NA      |
| Q15145 | Actin-related protein 2/3 complex subunit 3                                     | 3 | 1.47 | 0.035 | 7.9E-03 |
| P11163 | S-adenosylmethionine synthase isoform type-2                                    | 5 | 1.47 | 0.138 | 4.9E-02 |
| Q8J0J5 | Calcium-binding mitochondrial carrier protein Aarar2                            | 1 | 1.47 | NA    | NA      |
| Q69436 | Proteasome subunit beta type-7                                                  | 2 | 1.47 | NA    | NA      |
| Q88J54 | Protein LYRIC                                                                   | 3 | 1.47 | 0.147 | 1.2E-01 |
| P51159 | Ras-related protein Rab-27A                                                     | 4 | 1.46 | 0.207 | 1.6E-01 |
| Q62K01 | 60S ribosomal protein L7-like 1                                                 | 1 | 1.46 | NA    | NA      |
| P14550 | Alcohol dehydrogenase [NAD(P)+]                                                 | 1 | 1.46 | NA    | NA      |
| Q9HAV7 | GrpE protein homolog 1, mitochondrial                                           | 1 | 1.46 | NA    | NA      |
| P62973 | 60S ribosomal protein L13                                                       | 5 | 1.46 | 0.111 | 2.8E-02 |
| Q12924 | Anticodon RNA synthetase complex-interacting multifunctional protein 1          | 2 | 1.46 | NA    | NA      |
| Q9HAV7 | GrpE protein homolog 1, mitochondrial                                           | 1 | 1.46 | NA    | NA      |
| P62973 | 60S ribosomal protein L13                                                       | 5 | 1.46 | 0.111 | 2.8E-02 |
| Q12924 | Anticodon RNA synthetase complex-interacting multifunctional protein 1          | 2 | 1.46 | NA    | NA      |
| Q92445 | Far upstream element-binding protein 2                                          | 5 | 1.45 | 0.038 | 6.1E-04 |
| P17802 | Trangenein-2                                                                    | 3 | 1.45 | 0.047 | 1.5E-02 |
| Q3ZC08 | Mitochondrial import inner membrane translocase subunit TIMSO                   | 1 | 1.45 | NA    | NA      |
| P61978 | Heterogeneous nuclear ribonucleoprotein K                                       | 5 | 1.45 | 0.037 | 5.6E-04 |
| P11160 | Rab GDP-dissociation inhibitor alpha                                            | 1 | 1.45 | NA    | NA      |
| P62966 | Transformin-2 protein homolog beta                                              | 1 | 1.45 | NA    | NA      |
| Q43678 | NADH dehydrogenase [ubiquinone] 1 alpha subcomplex subunit 2                    | 3 | 1.45 | 0.096 | 6.2E-02 |
| Q16629 | Serine/arginine-rich splicing factor 7                                          | 4 | 1.44 | 0.124 | 5.5E-02 |
| Q08257 | Quinone oxidoreductase                                                          | 1 | 1.44 | NA    | NA      |
| P62136 | Serine/threonine-protein phosphatase PP1-alpha catalytic subunit                | 4 | 1.44 | 0.155 | 9.9E-02 |
| Q80K00 | NADH dehydrogenase [ubiquinone] 1 beta subcomplex subunit 10                    | 2 | 1.44 | NA    | NA      |
| Q13242 | Serine/arginine-rich splicing factor 9                                          | 2 | 1.44 | NA    | NA      |
| Q02318 | Stere 26-hydroxylase, mitochondrial                                             | 3 | 1.44 | 0.145 | 1.3E-01 |
| P52421 | 40S ribosomal protein S8                                                        | 6 | 1.44 | 0.068 | 1.0E-02 |
| P07602 | Protopapain                                                                     | 5 | 1.44 | 0.169 | 9.8E-02 |
| P64075 | Fructose-bisphosphate aldolase A                                                | 5 | 1.44 | 0.077 | 9.9E-03 |
| P51970 | NADH dehydrogenase [ubiquinone] 1 alpha subcomplex subunit 8                    | 2 | 1.44 | NA    | NA      |
| Q80K05 | Bcl-2-like protein 13                                                           | 2 | 1.43 | NA    | NA      |
| P53244 | Guanine nucleotide-binding protein subunit beta 2-like 1                        | 5 | 1.43 | 0.091 | 4.1E-03 |
| Q13217 | DnaJ homolog subfamily C member 3                                               | 1 | 1.43 | NA    | NA      |
| P13874 | Proyl 4-hydroxylase subunit alpha-1                                             | 3 | 1.43 | 0.189 | 2.0E-01 |
| O15511 | Actin-related protein 2/3 complex subunit 5                                     | 4 | 1.43 | 0.068 | 1.4E-02 |
| Q86LJ2 | Heterogeneous nuclear ribonucleoprotein U-like protein 1                        | 4 | 1.42 | 0.162 | 1.2E-01 |
| P04417 | Dihydropyridine reductase                                                       | 2 | 1.42 | NA    | NA      |
| Q92902 | Vesicle-associated membrane protein-associated protein B/C                      | 4 | 1.42 | 0.163 | 1.6E-01 |
| P04792 | Heat shock protein beta-1                                                       | 5 | 1.42 | 0.230 | 2.0E-01 |
| P62280 | 40S ribosomal protein S11                                                       | 5 | 1.42 | 0.079 | 1.1E-02 |
| Q15459 | Splicing factor 3A subunit 1                                                    | 4 | 1.42 | NA    | NA      |
| P25685 | DnaJ homolog subfamily B member 1                                               | 2 | 1.42 | NA    | NA      |
| P52987 | Heterogeneous nuclear ribonucleoprotein F                                       | 4 | 1.42 | 0.095 | 1.3E-02 |
| Q12874 | Splicing factor 3A subunit 3                                                    | 3 | 1.42 | 0.134 | 1.2E-01 |
| P22314 | Ubiquitin-like modifier-activating enzyme 1                                     | 5 | 1.42 | 0.068 | 6.8E-03 |
| Q14860 | Mitochondrial glutathione S-transferase 3                                       | 1 | 1.41 | NA    | NA      |
| P49721 | Proteasome subunit beta type-2                                                  | 2 | 1.41 | NA    | NA      |
| Q69471 | Prefoldin subunit 5                                                             | 1 | 1.41 | NA    | NA      |
| P40687 | Melanocyte protein PHEL                                                         | 5 | 1.41 | 0.057 | 3.5E-03 |
| Q01469 | Fatty acid-binding protein, epidermal                                           | 1 | 1.41 | NA    | NA      |
| Q15056 | Eukaryotic translation initiation factor 4H                                     | 1 | 1.41 | NA    | NA      |
| Q02790 | Hempepin                                                                        | 1 | 1.41 | 0.110 | 3.6E-02 |
| Q02790 | Peptidyl prolyl cis-trans isomerase FKBP4                                       | 2 | 1.41 | NA    | NA      |
| Q13976 | Ras GTPase-activating-like protein IQGAP2                                       | 1 | 1.41 | NA    | NA      |
| P46777 | 60S ribosomal protein L5                                                        | 5 | 1.40 | 0.077 | 1.2E-02 |
| Q14139 | Ubiquitin conjugation factor E4 A                                               | 1 | 1.40 | NA    | NA      |
| P07831 | Complement factor B                                                             | 1 | 1.40 | NA    | NA      |
| P84103 | Serine/arginine-rich splicing factor 3                                          | 4 | 1.40 | 0.105 | 5.0E-02 |
| Q62816 | Translational activator GCN1                                                    | 3 | 1.39 | 0.132 | 1.3E-01 |
| P52222 | Prothelin                                                                       | 5 | 1.39 | 0.072 | 5.0E-02 |
| Q8XK03 | Coiled-coil-helix-coiled-coil-helix domain-containing protein 3, mitochondrial  | 4 | 1.39 | 0.071 | 1.9E-02 |
| P17840 | Alpha-synuclein                                                                 | 1 | 1.39 | NA    | NA      |
| P51810 | C-protein coupled receptor 143                                                  | 1 | 1.39 | 0.064 | 2.5E-02 |
| Q9NP81 | Serine--tRNA ligase, mitochondrial                                              | 4 | 1.39 | 0.043 | 4.7E-03 |
| Q68J42 | Polyadenylate-binding protein 2                                                 | 2 | 1.39 | NA    | NA      |
| P51106 | Ras-related protein Rab-14                                                      | 1 | 1.39 | NA    | NA      |
| P17837 | Transaldolase                                                                   | 5 | 1.39 | 0.153 | 9.8E-02 |
| P53731 | 60S ribosomal protein L24                                                       | 5 | 1.39 | 0.219 | 2.1E-01 |
| P60981 | Dextrin                                                                         | 2 | 1.39 | NA    | NA      |
| P62829 | 60S ribosomal protein L23                                                       | 4 | 1.39 | 0.083 | 2.9E-02 |
| Q09028 | Histone-binding protein RBBP4                                                   | 2 | 1.39 | NA    | NA      |
| P54727 | UV excision repair protein RAD23 homolog B                                      | 5 | 1.39 | 0.087 | 2.0E-02 |
| Q89W87 | WD repeat and FYVE domain-containing protein 1                                  | 2 | 1.38 | NA    | NA      |
| P19404 | NADH dehydrogenase [ubiquinone] flavoprotein 2, mitochondrial                   | 2 | 1.38 | NA    | NA      |
| Q68314 | Histone H2B type 1-K                                                            | 1 | 1.38 | NA    | NA      |
| Q13277 | Syntaxin-3                                                                      | 1 | 1.38 | NA    | NA      |
| Q89V19 | F <sub>1</sub> nucleotidase domain-containing protein 3                         | 1 | 1.38 | NA    | NA      |
| Q89V19 | F <sub>1</sub> nucleotidase domain-containing protein 3                         | 1 | 1.38 | NA    | NA      |
| P50914 | THO complex subunit 4                                                           | 2 | 1.38 | NA    | NA      |
| P50914 | 60S ribosomal protein L14                                                       | 5 | 1.38 | 0.066 | 6.2E-03 |
| P30049 | ATP synthase subunit delta, mitochondrial                                       | 5 | 1.38 | 0.081 | 1.7E-02 |
| Q89B00 | Allograft inflammatory factor 1-like                                            | 3 | 1.38 | 0.130 | 1.3E-01 |
| P20711 | Glutathione S-transferase theta-1                                               | 1 | 1.37 | NA    | NA      |
| Q07020 | 60S ribosomal protein L18                                                       | 5 | 1.37 | 0.142 | 8.9E-02 |
| Q05660 | Syntenin-1                                                                      | 3 | 1.37 | 0.029 | 8.1E-03 |
| P64244 | 60S ribosomal protein L7a                                                       | 5 | 1.37 | 0.073 | 6.5E-02 |
| Q13151 | Heterogeneous nuclear ribonucleoprotein A0                                      | 4 | 1.37 | 0.065 | 1.7E-02 |
| Q6J4V4 | Coronin-1C                                                                      | 2 | 1.37 | NA    | NA      |
| Q8747  | Serine/threonine-protein kinase OSR1                                            | 1 | 1.37 | NA    | NA      |
| Q87X2  | Acyl-coenzyme A thioesterase 1                                                  | 2 | 1.36 | NA    | NA      |
| Q6JXV4 | Acopoprotein O-like                                                             | 1 | 1.36 | NA    | NA      |
| Q03136 | 3-ketohydroxyacyl-CoA synthase                                                  | 1 | 1.36 | NA    | NA      |
| Q8N3V7 | Sulfatase-modifying factor 2                                                    | 1 | 1.36 | NA    | NA      |
| P51981 | 14-3-3 protein gamma                                                            | 3 | 1.36 | 0.059 | 3.2E-02 |
| P69574 | Cytochrome c-1, heme protein, mitochondrial                                     | 2 | 1.36 | NA    | NA      |
| P52665 | Double-stranded RNA-specific adenosine deaminase                                | 3 | 1.36 | 0.145 | 1.7E-01 |
| Q14738 | Serine/threonine-protein phosphatase 2A 56 kDa regulatory subunit delta isoform | 1 | 1.36 | NA    | NA      |
| P53634 | Dipeptidyl peptidase 1                                                          | 1 | 1.36 | NA    | NA      |
| Q69879 | Histone H2B type 1-M                                                            | 1 | 1.36 | NA    | NA      |
| Q05519 | Serine/arginine-rich splicing factor 11                                         | 1 | 1.35 | NA    | NA      |
| P62249 | 40S ribosomal protein S16                                                       | 5 | 1.35 | 0.052 | 4.2E-03 |
| Q02022 | Guanine nucleotide-binding protein G(i)(G(S)G(O)) subunit gamma-7               | 1 | 1.35 | NA    | NA      |
| P20602 | Proteasome subunit beta type-5                                                  | 1 | 1.35 | NA    | NA      |
| P30084 | Enoyl-CoA hydratase, mitochondrial                                              | 3 | 1.35 | 0.113 | 1.2E-01 |
| P20599 | Polypyrimidine tract-binding protein 1                                          | 4 | 1.34 | 0.127 | 1.0E-01 |
| P20602 | Elongation factor 1-delta                                                       | 5 | 1.34 | 0.131 | 9.6E-02 |
| P50502 | Hsc70 interacting protein                                                       | 4 | 1.34 | 0.108 | 7.2E-02 |
| Q8JUA8 | Dremin-like protein                                                             | 1 | 1.34 | NA    | NA      |
| Q14165 | Mafectin                                                                        | 5 | 1.34 | 0.091 | 3.2E-02 |
| Q9Y280 | Protein canopy homolog 2                                                        | 4 | 1.34 | 0.187 | 2.1E-01 |
| P52688 | 60S ribosomal protein L22                                                       | 1 | 1.34 | NA    | NA      |
| P51532 | Transcription activator BRG1                                                    | 1 | 1.34 | NA    | NA      |
| Q43809 | Cleavage and polyadenylation specificity factor subunit 5                       | 3 | 1.34 | 0.163 | 2.2E-01 |
| P14978 | Small nuclear ribonucleoprotein-associated proteins B and B'                    | 1 | 1.34 | NA    | NA      |
| P62641 | Elongation factor 1-gamma                                                       | 5 | 1.34 | 0.091 | 3.2E-02 |
| Q6ZC78 | Mitochondrial fission factor                                                    | 2 | 1.34 | NA    | NA      |
| P51953 | 60S ribosomal protein L27                                                       | 5 | 1.34 | 0.101 | 4.5E-02 |
| P51148 | Ras-related protein Rab-5C                                                      | 1 | 1.33 | NA    | NA      |
| Q8JRX3 | Presequence protease, mitochondrial                                             | 3 | 1.33 | 0.213 | 3.1E-01 |
| P19971 | Thymidine phosphorylase                                                         | 1 | 1.33 | NA    | NA      |
| Q68531 | Apoptosis-inducing factor 1, mitochondrial                                      | 1 | 1.33 | NA    | NA      |
| Q89FV1 | Ubiquitin thioesterase OTUB1                                                    | 2 | 1.33 | NA    | NA      |
| P14866 | Heterogeneous nuclear ribonucleoprotein L                                       | 5 | 1.32 | 0.107 | 5.8E-02 |
| P13010 | X-ray repair cross-complementing protein 5                                      | 5 | 1.32 | 0.053 | 6.2E-03 |
| P52269 | 40S ribosomal protein S18                                                       | 5 | 1.32 | 0.064 | 2.9E-02 |
| Q8TAC2 | SWSNF complex subunit SMARCC2                                                   | 2 | 1.32 | NA    | NA      |
| P46778 | 60S ribosomal protein L21                                                       | 3 | 1.32 | 0.107 | 1.2E-01 |
| Q8N5E4 | Isochorate--tRNA ligase, mitochondrial                                          | 2 | 1.32 | 0.166 | 2.0E-01 |
| P50874 | Poly (ADP-ribose) polymerase 1                                                  | 5 | 1.31 | 0.108 | 6.5E-02 |
| BSME19 | Eukaryotic translation initiation factor 3 subunit C-like protein               | 5 | 1.31 | 0.122 | 9.0E-02 |
| Q89Z08 | Protein Niban                                                                   | 4 | 1.31 | 0.123 | 1.0E-01 |
| Q14737 | Programmed cell death protein 5                                                 | 1 | 1.31 | NA    | NA      |
| P55192 | Methionine--tRNA ligase, cytoplasmic                                            | 2 | 1.31 | NA    | NA      |
| P62913 | 60S ribosomal protein L11                                                       | 4 | 1.31 | 0.062 | 2.3E-02 |
| Q14561 | Acy1 carrier protein, mitochondrial                                             | 4 | 1.31 | 0.124 | 1.2E-01 |
| Q89V95 | Cullin-associated NEDD8-dissociated protein 1                                   | 5 | 1.31 | 0.108 | 6.8E-02 |
| Q89Y95 | Transmembrane protein 192                                                       | 1 | 1.31 | NA    | NA      |
| P51040 | Succinate dehydrogenase [ubiquinone] flavoprotein subunit, mitochondrial        | 5 | 1.30 | 0.068 | 1.8E-02 |
| Q8NP40 | ER membrane protein complex subunit 7                                           | 1 | 1.30 | NA    | NA      |
| P26640 | Valine--tRNA ligase                                                             | 4 | 1.30 | 0.090 | 6.1E-02 |
| P51313 | 60S ribosomal protein L15                                                       | 2 | 1.30 | NA    | NA      |
| P14864 | Cytochrome c oxidase subunit 6B1                                                | 1 | 1.30 | 0.091 | 3.2E-02 |
| Q8HD20 | Manganese-transferring ATPase 13A1                                              | 2 | 1.30 | NA    | NA      |
| P69965 | Hemoglobin subunit alpha                                                        | 5 | 1.30 | 0.161 | 1.6E-01 |
| P69866 | 60S ribosomal protein S20                                                       | 5 | 1.30 | 0.119 | 6.9E-02 |
| Q11216 | Glycogen phosphorylase, brain form                                              | 5 | 1.29 | 0.117 | 9.5E-02 |
| Q02878 | 60S ribosomal protein L5                                                        | 5 | 1.29 | 0.119 | 1.0E-01 |
| Q16531 | DNA damage-binding protein 1                                                    | 3 | 1.29 | 0.041 | 2.5E-02 |
| P26885 | Peptidyl prolyl cis-trans isomerase FKBP2                                       | 2 | 1.29 | NA    | NA      |
| P11204 | ADP-ribosylation factor 3                                                       | 3 | 1.29 | 0.116 | 1.6E-01 |
| Q8NBJ5 | Procollagen galactosyltransferase 1                                             | 1 | 1.29 | NA    | NA      |
| Q12913 | Receptor tyrosine protein phosphatase eta                                       | 3 | 1.29 | 0.178 | 2.9E-01 |
| P10644 | cAMP-dependent protein kinase type I-alpha regulatory subunit                   | 5 | 1.29 | 0.115 | 6.4E-02 |
| Q8NC56 | LEM domain-containing protein 2                                                 | 4 | 1.28 | 0.029 | 3.1E-03 |

Table S17 Average Non-Metastatic Tumors

|        |                                                                                   |   |      |       |         |
|--------|-----------------------------------------------------------------------------------|---|------|-------|---------|
| P11442 | Heat shock cognate 71 kDa protein                                                 | 5 | 1.28 | 0.065 | 1.8E-02 |
| Q8R043 | OXA domain-containing protein 1                                                   | 1 | 1.28 | NA    | NA      |
| P20700 | Lamin-B1                                                                          | 5 | 1.28 | 0.052 | 8.7E-03 |
| P38404 | ADP-ribosylation factor-like protein 2                                            | 1 | 1.28 | NA    | NA      |
| P30740 | Leukocyte elastase inhibitor                                                      | 4 | 1.28 | 0.112 | 1.1E-01 |
| Q9H0J4 | Ras-related protein Rab-1B                                                        | 1 | 1.28 | NA    | NA      |
| P15586 | N-acetylglucosamine-6-sulfatase                                                   | 3 | 1.28 | 0.276 | 4.7E-01 |
| Q92841 | Probable ATP-dependent RNA helicase DDX17                                         | 5 | 1.28 | 0.028 | 9.5E-04 |
| P07203 | Glutathione peroxidase 1                                                          | 2 | 1.28 | NA    | NA      |
| O14745 | Na(+)/H(+) exchange regulatory cofactor NHE-RF1                                   | 2 | 1.28 | NA    | NA      |
| P46459 | Glutathione S-transferase theta-2                                                 | 1 | 1.27 | NA    | NA      |
| P02042 | Hemoglobin subunit delta                                                          | 5 | 1.27 | 0.229 | 3.5E-01 |
| OT5336 | Vesicle-trafficking protein SEC22b                                                | 3 | 1.27 | 0.107 | 1.5E-01 |
| Q9Y411 | Unconventional myosin-V                                                           | 4 | 1.27 | 0.085 | 6.7E-02 |
| Q00341 | Vglinin                                                                           | 2 | 1.27 | NA    | NA      |
| Q07668 | KH domain-containing, RNA-binding, signal transduction-associated protein 1       | 5 | 1.27 | 0.098 | 6.7E-02 |
| Q6UVK1 | Chondroitin sulfate proteoglycan 4                                                | 4 | 1.27 | 0.234 | 3.8E-01 |
| OT9947 | ATP synthase subunit 6, mitochondrial                                             | 5 | 1.27 | 0.065 | 2.2E-02 |
| P21912 | Succinate dehydrogenase [ubiquinone] iron-sulfur subunit, mitochondrial           | 5 | 1.27 | 0.120 | 1.2E-01 |
| P01859 | Ig gamma-2 chain C region                                                         | 5 | 1.27 | 0.192 | 2.8E-01 |
| P12956 | X-ray repair cross-complementing protein 6                                        | 5 | 1.27 | 0.049 | 8.2E-03 |
| P52272 | Heterogeneous nuclear ribonucleoprotein M                                         | 5 | 1.27 | 0.092 | 6.2E-02 |
| P34952 | Heat shock 70 kDa protein 4                                                       | 5 | 1.27 | 0.073 | 3.2E-02 |
| Q13011 | Delta(3,5)-Delta(2,4)-sterolyl-CoA isomerase, mitochondrial                       | 5 | 1.27 | 0.142 | 1.7E-01 |
| P00555 | Aspartate aminotransferase, mitochondrial                                         | 5 | 1.27 | 0.089 | 5.9E-02 |
| P02040 | Ras-related protein Rab-6A                                                        | 1 | 1.26 | NA    | NA      |
| Q9R1V7 | ATPase family AAA domain-containing protein 3A                                    | 1 | 1.26 | NA    | NA      |
| P78347 | General transcription factor II-I                                                 | 4 | 1.26 | 0.085 | 7.1E-02 |
| Q90969 | Cytochrome c oxidase subunit 8C                                                   | 5 | 1.26 | 0.098 | 7.7E-02 |
| P49821 | NADH dehydrogenase [ubiquinone] flavoprotein 1, mitochondrial                     | 5 | 1.26 | NA    | NA      |
| P38117 | Electron transfer flavoprotein subunit beta                                       | 5 | 1.26 | 0.029 | 1.3E-03 |
| Q16762 | Thioalate sulfurtransferase                                                       | 1 | 1.26 | NA    | NA      |
| P11421 | V-type proton ATPase subunit d 1                                                  | 2 | 1.12 | 0.112 | 1.6E-01 |
| O43598 | Z'-deoxydeucoside 5'-phosphatase 1                                                | 2 | 1.26 | NA    | NA      |
| P38606 | V-type proton ATPase catalytic subunit A                                          | 5 | 1.25 | 0.201 | 3.2E-01 |
| Q15144 | Actin-related protein 2/3 complex subunit 2                                       | 5 | 1.25 | 0.048 | 9.2E-03 |
| P22061 | Protein-L-isoaspartate (D-aspartate) O-methyltransferase                          | 1 | 1.25 | NA    | NA      |
| Q9Y242 | Band 4.1-like protein 3                                                           | 2 | 1.25 | NA    | NA      |
| Q9N859 | Thioredoxin domain-containing protein 5                                           | 5 | 1.25 | 0.128 | 1.5E-01 |
| P15927 | Hexokinase-1                                                                      | 4 | 1.25 | 0.214 | 3.7E-01 |
| P40429 | 60S ribosomal protein L13a                                                        | 5 | 1.25 | 0.095 | 3.3E-02 |
| P50213 | Isocitrate dehydrogenase [NAD] subunit alpha, mitochondrial                       | 5 | 1.25 | 0.134 | 1.7E-01 |
| P09897 | Palmitoyl-protein thioesterase 1                                                  | 1 | 1.25 | NA    | NA      |
| Q9Y0X3 | Sorting nexin-5                                                                   | 1 | 1.25 | NA    | NA      |
| P62899 | 60S ribosomal protein L31                                                         | 3 | 1.25 | 0.139 | 2.5E-01 |
| OT5367 | Core histone macro-H2A.1                                                          | 5 | 1.24 | 0.048 | 1.1E-02 |
| P48411 | Elongation factor Tu, mitochondrial                                               | 3 | 1.23 | 0.063 | 2.6E-02 |
| Q9BR76 | Coronin-1B                                                                        | 4 | 1.24 | 0.101 | 1.2E-01 |
| P04233 | HLA class II histocompatibility antigen gamma chain                               | 1 | 1.24 | NA    | NA      |
| P01625 | Ig kappa chain V IV region Lmi                                                    | 2 | 1.24 | NA    | NA      |
| P05198 | Eukaryotic translation initiation factor 2 subunit 1                              | 3 | 1.24 | 0.110 | 1.9E-01 |
| OT5489 | NADH dehydrogenase [ubiquinone] iron-sulfur protein 3, mitochondrial              | 5 | 1.24 | 0.037 | 4.3E-03 |
| Q9UHQ9 | NADH-cytochrome b5 reductase 1                                                    | 5 | 1.24 | 0.072 | 1.1E-02 |
| P62753 | 40S ribosomal protein S6                                                          | 5 | 1.24 | 0.063 | 2.8E-02 |
| P02058 | Histone H2A type 1                                                                | 3 | 1.23 | 0.213 | 4.3E-01 |
| P09728 | Z'-5'-oligoadenylate synthase 2                                                   | 1 | 1.23 | NA    | NA      |
| P49755 | Transmembrane emp24 domain-containing protein 10                                  | 3 | 1.23 | 0.088 | 9.1E-02 |
| Q00006 | Heterogeneous nuclear ribonucleoprotein Q                                         | 2 | 1.12 | 0.112 | 1.6E-01 |
| P02810 | Calpastatin                                                                       | 2 | 1.22 | NA    | NA      |
| Q9L855 | CDK5 regulatory subunit-associated complex 3                                      | 2 | 1.22 | NA    | NA      |
| Q00029 | Glutathione S-transferase theta-2                                                 | 2 | 1.22 | NA    | NA      |
| Q14974 | Importin subunit beta-1                                                           | 5 | 1.22 | 0.143 | 2.3E-01 |
| Q13459 | Unconventional myosin-Xb                                                          | 1 | 1.22 | NA    | NA      |
| P39598 | 26S protease regulatory subunit 7                                                 | 3 | 1.22 | 0.096 | 1.8E-01 |
| P08107 | Heat shock 70 kDa protein 1A/1B                                                   | 5 | 1.22 | 0.178 | 3.8E-01 |
| P13796 | Plastin-2                                                                         | 2 | 1.22 | NA    | NA      |
| P14314 | Glucosidase 2 subunit beta                                                        | 5 | 1.22 | 0.133 | 2.2E-01 |
| O43390 | Heterogeneous nuclear ribonucleoprotein R                                         | 5 | 1.21 | 0.151 | 2.7E-01 |
| Q14847 | LIM and SH3 domain protein 1                                                      | 5 | 1.21 | 0.199 | 4.2E-01 |
| Q49227 | Protein ERGIC-53                                                                  | 2 | 1.21 | NA    | NA      |
| Q05397 | Focal adhesion kinase 1                                                           | 1 | 1.21 | NA    | NA      |
| Q9Y968 | CO2-associated protein 1                                                          | 1 | 1.21 | NA    | NA      |
| Q99553 | Calnesurin B homologous protein 1                                                 | 2 | 1.21 | NA    | NA      |
| O15143 | Actin-related protein 2/3 complex subunit 1B                                      | 2 | 1.21 | NA    | NA      |
| P23756 | Carmitin O-palmitoyltransferase 2, mitochondrial                                  | 1 | 1.21 | NA    | NA      |
| Q02252 | Methylmalonate-semialdehyde dehydrogenase [acylating], mitochondrial              | 5 | 1.21 | 0.076 | 6.8E-02 |
| P49591 | Serine-IRNA ligase, cytoplasmic                                                   | 4 | 1.21 | 0.084 | 1.4E-01 |
| P43866 | 26S protease regulatory subunit 6B                                                | 4 | 1.20 | 0.041 | 2.0E-02 |
| Q90922 | Dihydrodipoyl dehydrogenase, mitochondrial                                        | 5 | 1.20 | 0.087 | 1.0E-01 |
| P49584 | Short-branched chain specific acyl-CoA dehydrogenase, mitochondrial               | 2 | 1.20 | NA    | NA      |
| Q9P269 | Ribosome-binding protein 1                                                        | 5 | 1.20 | 0.055 | 2.9E-02 |
| Q9P9K7 | Ankyrin                                                                           | 1 | 1.20 | NA    | NA      |
| P14968 | Aspartate-tRNA ligase, cytoplasmic                                                | 1 | 1.20 | 0.102 | 1.5E-01 |
| Q13409 | Cytoplasmic dynein 1 intermediate chain 2                                         | 1 | 1.20 | NA    | NA      |
| P06730 | Eukaryotic translation initiation factor 4E                                       | 1 | 1.20 | NA    | NA      |
| Q43852 | Kalmanin                                                                          | 1 | 1.20 | 0.064 | 1.5E-01 |
| P31949 | Protein S100A11                                                                   | 4 | 1.20 | 0.223 | 4.8E-01 |
| Q02818 | Ruocobindin-1                                                                     | 5 | 1.20 | 0.156 | 3.1E-01 |
| Q14152 | Eukaryotic translation initiation factor 3 subunit A                              | 5 | 1.20 | 0.096 | 1.4E-01 |
| Q03519 | Antigen peptide transporter 2                                                     | 1 | 1.19 | NA    | NA      |
| P56378 | 60S ribosomal protein L4                                                          | 5 | 1.19 | 0.099 | 1.5E-01 |
| P53960 | IST1 homolog                                                                      | 1 | 1.19 | NA    | NA      |
| O65202 | LETM1 and EF-hand domain-containing protein 1, mitochondrial                      | 4 | 1.19 | 0.133 | 2.8E-01 |
| P72255 | Hippocampin-like protein 1                                                        | 1 | 1.19 | NA    | NA      |
| P01857 | Ig gamma-1 chain C region                                                         | 5 | 1.19 | 0.162 | 3.5E-01 |
| P52669 | 60S ribosomal protein L9                                                          | 5 | 1.19 | 0.071 | 7.2E-02 |
| Q90949 | ADP-ribosylation factor-like protein 8A                                           | 2 | 1.19 | NA    | NA      |
| Q9Y282 | Eukaryotic translation initiation factor 3 subunit L                              | 4 | 1.18 | 0.083 | 1.3E-01 |
| P01572 | B-cell receptor-associated complex 31                                             | 5 | 1.18 | 0.108 | 1.8E-01 |
| P23366 | 40S ribosomal protein S3                                                          | 5 | 1.18 | 0.084 | 1.2E-01 |
| P62277 | 40S ribosomal protein S13                                                         | 5 | 1.18 | 0.096 | 1.6E-01 |
| Q02896 | Golgi apparatus protein 1                                                         | 2 | 1.18 | NA    | NA      |
| P45880 | Voltage-dependent anion-selective channel protein 2                               | 5 | 1.18 | 0.047 | 2.5E-02 |
| P09402 | Emerin                                                                            | 5 | 1.18 | 0.131 | 2.8E-01 |
| Q90225 | Apoptosis inhibitor 5                                                             | 3 | 1.18 | 0.039 | 3.3E-02 |
| P15311 | Ezrin                                                                             | 3 | 1.18 | 0.091 | 2.1E-01 |
| P62786 | Thymosin                                                                          | 2 | 1.18 | NA    | NA      |
| Q95535 | Heterochromatin protein 1-binding protein 3                                       | 4 | 1.17 | 0.228 | 5.5E-01 |
| P61158 | Actin-related protein 3                                                           | 5 | 1.17 | 0.116 | 2.4E-01 |
| Q90923 | Prohibitin-2                                                                      | 5 | 1.17 | 0.068 | 8.2E-02 |
| Q9Y285 | RuvB-like 1                                                                       | 1 | 1.17 | NA    | NA      |
| P17844 | Probable ATP-dependent RNA helicase DDX5                                          | 5 | 1.17 | 0.104 | 2.1E-01 |
| P38919 | Eukaryotic initiation factor 4A-III                                               | 3 | 1.17 | 0.188 | 5.9E-01 |
| P46779 | 60S ribosomal protein L28                                                         | 2 | 1.17 | NA    | NA      |
| Q14817 | AP-3 complex subunit delta-1                                                      | 1 | 1.16 | NA    | NA      |
| Q08830 | Peptide deformin-1                                                                | 5 | 1.16 | 0.139 | 3.1E-01 |
| Q9BLP2 | Knectin                                                                           | 5 | 1.16 | 0.113 | 2.5E-01 |
| O14949 | Cytochrome b-c1 complex subunit 6                                                 | 1 | 1.16 | NA    | NA      |
| P15880 | 40S ribosomal protein S2                                                          | 5 | 1.16 | 0.102 | 2.2E-01 |
| P48047 | ATP synthase subunit O, mitochondrial                                             | 5 | 1.16 | 0.055 | 5.7E-02 |
| P07108 | Signal recognition particle 14 kDa protein                                        | 4 | 1.16 | 0.110 | 2.8E-01 |
| P30101 | Protein disulfide-isomerase A3                                                    | 5 | 1.15 | 0.145 | 3.6E-01 |
| P30048 | Thioredoxin-dependent peroxide reductase, mitochondrial                           | 5 | 1.15 | 0.127 | 3.3E-01 |
| Q5JW72 | Guanine nucleotide-binding protein (G <i>q</i> ) subunit alpha isoforms XLas      | 2 | 1.15 | NA    | NA      |
| P17858 | ATP-dependent epsilon-phosphotransferase, liver type                              | 5 | 1.15 | 0.062 | 1.1E-01 |
| P49327 | Fatty acid synthase                                                               | 2 | 1.15 | NA    | NA      |
| P76371 | T-complex protein 1 subunit beta                                                  | 5 | 1.15 | 0.077 | 7.0E-02 |
| P11310 | Medium-chain specific acyl-CoA dehydrogenase, mitochondrial                       | 3 | 1.15 | 0.078 | 2.2E-01 |
| P12236 | ADP/ATP translocase 3                                                             | 2 | 1.14 | NA    | NA      |
| Q15008 | 26S proteasome non-ATPase regulatory subunit 6                                    | 2 | 1.14 | NA    | NA      |
| P46782 | 40S ribosomal protein S5                                                          | 4 | 1.14 | 0.094 | 2.5E-01 |
| Q9NDX7 | Spartin                                                                           | 1 | 1.14 | NA    | NA      |
| P13934 | Electron transfer flavoprotein subunit alpha, mitochondrial                       | 1 | 1.14 | NA    | NA      |
| A11070 | Acetolactate synthase-like protein                                                | 2 | 1.14 | NA    | NA      |
| P06576 | ATP synthase subunit beta, mitochondrial                                          | 5 | 1.14 | 0.079 | 1.7E-01 |
| Q15691 | Mitochondrial-associated protein RPIIB family member 1                            | 2 | 1.13 | 0.123 | 3.0E-01 |
| P31146 | Coronin-1A                                                                        | 2 | 1.14 | NA    | NA      |
| Q9P0L0 | Vesicle-associated membrane protein-associated protein A                          | 3 | 1.14 | 0.308 | 7.1E-01 |
| Q90973 | Protein arginine N-methyltransferase 1                                            | 2 | 1.14 | NA    | NA      |
| P23284 | Pepdyl prolyl cis-trans isomerase B                                               | 5 | 1.14 | 0.218 | 5.9E-01 |
| P56873 | Serine/threonine-protein phosphatase PP1 gamma catalytic subunit                  | 1 | 1.14 | NA    | NA      |
| Q13283 | Ras GTPase-activating protein-binding protein 1                                   | 3 | 1.14 | 0.070 | 2.1E-01 |
| Q9N7K5 | Osp-like ATPase 1                                                                 | 2 | 1.13 | NA    | NA      |
| P59998 | Actin-related protein 2/3 complex subunit 4                                       | 5 | 1.13 | 0.088 | 2.2E-01 |
| P51665 | 26S proteasome non-ATPase regulatory subunit 7                                    | 3 | 1.13 | 0.078 | 2.5E-01 |
| Q9Y5M8 | Signal recognition particle receptor subunit beta                                 | 2 | 1.13 | NA    | NA      |
| Q14980 | Exportin-1                                                                        | 2 | 1.13 | NA    | NA      |
| P27787 | Calreticulin                                                                      | 5 | 1.13 | 0.105 | 3.0E-01 |
| Q96224 | Far upstream element-binding protein 3                                            | 1 | 1.13 | NA    | NA      |
| P27708 | CAO protein                                                                       | 3 | 1.13 | 0.028 | 4.7E-02 |
| P30153 | Serine/threonine-protein phosphatase 2A 65 kDa regulatory subunit A alpha isoform | 5 | 1.13 | 0.062 | 1.2E-01 |
| P71281 | V-type proton ATPase subunit B, brain isoform                                     | 5 | 1.13 | 0.152 | 4.6E-01 |
| P60454 | Serpin H1                                                                         | 5 | 1.13 | 0.075 | 1.6E-01 |
| P08543 | V-type proton ATPase subunit E 1                                                  | 3 | 1.13 | 0.200 | 6.0E-01 |
| Q95716 | Ras-related protein Rab-3D                                                        | 1 | 1.13 | NA    | NA      |
| P11586 | C-1-tetrahydrofolate synthase, cytoplasmic                                        | 5 | 1.13 | 0.063 | 1.3E-01 |
| O14773 | Tripeptidyl-peptidase 1                                                           | 5 | 1.13 | 0.201 | 5.8E-01 |
| P20645 | Calcium-dependent mannose-6-phosphate receptor                                    | 3 | 1.13 | 0.103 | 3.7E-01 |
| P62081 | 40S ribosomal protein S7                                                          | 2 | 1.13 | NA    | NA      |
| Q13423 | NAD(P) transhydrogenase, mitochondrial                                            | 5 | 1.13 | 0.177 | 5.4E-01 |
| P20645 | Prelinin-A/C                                                                      | 2 | 1.13 | 0.109 | 3.8E-01 |
| O60493 | Sorting nexin-3                                                                   | 2 | 1.12 | NA    | NA      |
| O00021 | 26S proteasome non-ATPase regulatory subunit 11                                   | 5 | 1.12 | 0.109 | 3.2E-01 |
| P46109 | Crk-like protein                                                                  | 4 | 1.12 | NA    | NA      |
| P62318 | Small nuclear ribonucleoprotein Sm D3                                             | 4 | 1.12 | 0.074 | 2.2E-01 |
| P54136 | Arginine-tRNA ligase, cytoplasmic                                                 | 4 | 1.12 | 0.088 | 3.3E-01 |
| P30533 | Alpha-2-macroglobulin receptor-associated protein                                 | 3 | 1.12 | 0.153 | 5.4E-01 |
| P39023 | 60S ribosomal protein L3                                                          | 5 | 1.12 | 0.057 | 1.2E-01 |
| Q13310 | Polysialyltransferase-binding protein 4                                           | 2 | 1.12 | NA    | NA      |
| Q10718 | NADH dehydrogenase [ubiquinone] 1 alpha subcomplex subunit 5                      | 1 | 1.12 | NA    | NA      |
| Q90WV6 | Stimulator of interferon genes protein                                            | 1 | 1.12 | NA    | NA      |
| Q15717 | ELAV-like protein 1                                                               | 1 | 1.12 | 0.143 | 4.8E-01 |
| Q99442 | Translocation protein SEC22                                                       | 4 | 1.12 | 0.070 | 2.1E-01 |
| P23288 | NAD-dependent malic enzyme, mitochondrial                                         | 1 | 1.12 | NA    | NA      |
| P18124 | 60S ribosomal protein L7                                                          | 5 | 1.12 | 0.079 | 2.4E-01 |
| Q09442 | Translocation protein SEC22                                                       | 4 | 1.12 | 0.070 | 2.1E-01 |
| P11387 | DNA topoisomerase I                                                               | 1 | 1.11 | NA    | NA      |
| O60486 | Plexin-C1                                                                         | 3 | 1.11 | 0.043 | 1.3E-01 |
| Q93H12 | Acylglycerol kinase, mitochondrial                                                | 1 | 1.11 | NA    | NA      |
| Q9UJ17 | GTP-AMP phosphotransferase AK3, mitochondrial                                     | 5 | 1.11 | 0.121 | 4.3E-01 |
| P05388 | 60S acidic ribosomal protein P0                                                   | 5 | 1.11 | 0.106 | 3.8E-01 |
| P78527 | DNA-dependent protein kinase catalytic subunit                                    | 5 | 1.11 | 0.073 | 2.3E-01 |
| OT5336 | NADH dehydrogenase [ubiquinone] iron-sulfur protein 2, mitochondrial              | 5 | 1.11 | 0.081 | 2.7E-01 |
| P61006 | Ras-related protein Rab-8A                                                        | 1 | 1.11 | NA    | NA      |
| P09072 | U1 small nuclear ribonucleoprotein A                                              | 4 | 1.10 | 0.212 | 6.8E-01 |
| Q02643 | 60S ribosomal protein L18a                                                        | 4 | 1.10 | 0.091 | 1.6E-01 |
| P28838 | Cytosol aminopeptidase                                                            | 4 | 1.10 | 0.187 | 6.1E-01 |

Table S17 Average Non-Metastatic Tumors

|         |                                                                                               |   |      |       |         |
|---------|-----------------------------------------------------------------------------------------------|---|------|-------|---------|
| P10606  | Cytochrome c oxidase subunit 6B, mitochondrial                                                | 5 | 1.10 | 0.100 | 4.1E-01 |
| Q13588  | Sorting nexin-1                                                                               | 4 | 1.10 | 0.117 | 4.8E-01 |
| P30050  | 60S ribosomal protein L12                                                                     | 3 | 1.10 | 0.091 | 4.2E-01 |
| P25705  | ATP synthase subunit alpha, mitochondrial                                                     | 5 | 1.09 | 0.076 | 3.0E-01 |
| Q80470  | Serratia RNA effector molecule homolog                                                        | 1 | NA   | NA    | NA      |
| P54709  | Sodium/potassium-transporting ATPase subunit beta-3                                           | 5 | 1.09 | 0.059 | 2.2E-01 |
| P62627  | ATP-dependent 6-phosphofructokinase, muscle type                                              | 5 | 1.08 | 0.077 | 3.3E-01 |
| P11177  | Pyruvate dehydrogenase E1 component subunit beta, mitochondrial                               | 4 | 1.08 | 0.067 | 3.0E-01 |
| Q9Y230  | RuvB-like 2                                                                                   | 4 | 1.09 | 0.122 | 5.4E-01 |
| P62917  | 60S ribosomal protein L8                                                                      | 4 | 1.09 | 0.127 | 5.6E-01 |
| Q92568  | Heat shock protein 105 kDa                                                                    | 4 | 1.09 | 0.111 | 5.9E-01 |
| Q15233  | Non-POU domain-containing octamer-binding protein                                             | 5 | 1.09 | 0.110 | 5.0E-01 |
| PA3480  | Nicotinamide phosphoribosyltransferase                                                        | 3 | 1.08 | 0.109 | 5.3E-01 |
| O73540  | Programmed cell death protein 6                                                               | 2 | 1.08 | NA    | NA      |
| P13073  | Cytochrome c oxidase subunit 4 isoform 1, mitochondrial                                       | 5 | 1.08 | 0.121 | 5.7E-01 |
| O15173  | Membrane-associated progesterone receptor component 2                                         | 4 | 1.08 | 0.058 | 2.3E-01 |
| P62979  | Ubiquitin-40S ribosomal protein S27a                                                          | 2 | 1.08 | NA    | NA      |
| P18077  | 60S ribosomal protein L35a                                                                    | 2 | 1.08 | NA    | NA      |
| Q68433  | Coiled-coil domain-containing protein 47                                                      | 1 | 1.07 | NA    | NA      |
| O65881  | Thioredoxin domain-containing protein 12                                                      | 2 | 1.07 | NA    | NA      |
| Q13228  | Selenium-binding protein 1                                                                    | 4 | 1.07 | 0.212 | 7.6E-01 |
| P09331  | NADH ubiquinone oxidoreductase 75 kDa subunit, mitochondrial                                  | 5 | 1.07 | 0.111 | 5.9E-01 |
| Q14697  | Neutral alpha-glucosidase AB                                                                  | 5 | 1.07 | 0.118 | 6.1E-01 |
| PA6840  | Ras GTPase-activating like protein IQGAP1                                                     | 5 | 1.07 | 0.152 | 7.0E-01 |
| Q13347  | Eukaryotic translation initiation factor 3 subunit 1                                          | 1 | 1.06 | NA    | NA      |
| O60664  | Perlepin-3                                                                                    | 3 | 1.06 | 0.086 | 5.5E-01 |
| P35542  | ATP synthase subunit gamma, mitochondrial                                                     | 1 | 1.06 | NA    | NA      |
| O00303  | Eukaryotic translation initiation factor 3 subunit F                                          | 2 | 1.06 | NA    | NA      |
| O94906  | Pre-mRNA processing factor 6                                                                  | 1 | 1.06 | NA    | NA      |
| PA2187  | Lamina-associated polypeptide 2, isoforms beta/gamma                                          | 5 | 1.06 | 0.229 | 8.2E-01 |
| PA2858  | Huntingtin                                                                                    | 1 | 1.06 | NA    | NA      |
| O60568  | Procollagen-lysine 2-oxoglutarate 5-dioxygenase 3                                             | 1 | 1.05 | NA    | NA      |
| P27011  | 40S ribosomal protein S4, X isoform                                                           | 5 | 1.05 | 0.104 | 6.4E-01 |
| P29590  | Protein PML                                                                                   | 4 | 1.05 | 0.273 | 8.6E-01 |
| O60298  | NADH dehydrogenase [ubiquinone] 1 subunit C2                                                  | 1 | 1.05 | NA    | NA      |
| Q73523  | Protein Naprap homolog 2                                                                      | 2 | 1.05 | NA    | NA      |
| Q72745  | Transmembrane emp24 domain-containing protein 4                                               | 1 | 1.05 | NA    | NA      |
| O75844  | ATP synthase subunit g, mitochondrial                                                         | 5 | 1.05 | 0.059 | 4.4E-01 |
| P56566  | NADH dehydrogenase [ubiquinone] 1 alpha subcomplex subunit 6                                  | 1 | 1.05 | NA    | NA      |
| Q14980  | Nuclear mitotic apparatus protein 1                                                           | 5 | 1.05 | 0.036 | 2.3E-01 |
| Q8H101  | Ras-related protein Rab-2B                                                                    | 1 | 1.05 | NA    | NA      |
| P63000  | Ras-related C3 botulinum toxin substrate 1                                                    | 4 | 1.05 | 0.064 | 5.0E-01 |
| O75843  | U5 small nuclear ribonucleoprotein 200 kDa helicase                                           | 4 | 1.05 | 0.127 | 7.3E-01 |
| P51531  | Prostate-glial transcription activator SNF2L1                                                 | 1 | 1.05 | NA    | NA      |
| Q27811  | Inverted formin-2                                                                             | 3 | 1.05 | 0.127 | 7.5E-01 |
| Q15385  | Poly(C)-binding protein 1                                                                     | 5 | 1.05 | 0.178 | 8.1E-01 |
| Q8H101  | Thioredoxin-related transmembrane protein 1                                                   | 1 | 1.05 | NA    | NA      |
| Q96A24  | Far upstream element-binding protein 1                                                        | 4 | 1.04 | 0.062 | 5.3E-01 |
| Q69K61  | CDGSH iron-sulfur domain-containing protein 2                                                 | 5 | 1.04 | 0.063 | 6.3E-01 |
| P22307  | Non-specific lipid transfer protein                                                           | 1 | 1.04 | NA    | NA      |
| P01860  | Ig gamma 3 chain C region                                                                     | 5 | 1.04 | 0.121 | 7.4E-01 |
| Q8P209  | Pre-miRNA-processing splicing factor 8                                                        | 2 | 1.04 | NA    | NA      |
| P22059  | Oxyester-binding protein 1                                                                    | 1 | 1.04 | NA    | NA      |
| P07063  | Histone H2B type F-3                                                                          | 2 | 1.04 | NA    | NA      |
| P24752  | Acetyl-CoA acetyltransferase, mitochondrial                                                   | 5 | 1.04 | 0.115 | 7.6E-01 |
| P01023  | Alpha 2-macroglobulin                                                                         | 5 | 1.04 | 0.089 | 7.0E-01 |
| PA6977  | Dolichyl-diphosphocholesterol-protein glycosyltransferase subunit STT3A                       | 3 | 1.03 | 0.150 | 8.4E-01 |
| PA4304  | Glycerol-3-phosphate dehydrogenase, mitochondrial                                             | 5 | 1.03 | 0.164 | 8.9E-01 |
| PA6781  | 40S ribosomal protein S9                                                                      | 5 | 1.03 | 0.070 | 6.6E-01 |
| P01019  | Ras-related protein Rab-2A                                                                    | 1 | 1.03 | NA    | NA      |
| Q01844  | RNA-binding protein EWS                                                                       | 2 | 1.03 | 0.073 | 7.0E-01 |
| P11940  | Polyadenylate-binding protein 1                                                               | 5 | 1.03 | 0.030 | 3.8E-01 |
| Q69829  | Coprin-1                                                                                      | 1 | 1.03 | NA    | NA      |
| Q9Y354  | Dehydrogenase/reductase SDR family member 7                                                   | 1 | 1.03 | NA    | NA      |
| P22695  | Cytochrome b-c1 complex subunit 2, mitochondrial                                              | 5 | 1.02 | 0.118 | 8.4E-01 |
| P62887  | Ubiquitin-60S ribosomal protein L40                                                           | 3 | 1.02 | 0.042 | 3.2E-01 |
| P61160  | Actin-related protein 2                                                                       | 5 | 1.02 | 0.031 | 4.8E-01 |
| O43681  | ATPase ASNA1                                                                                  | 3 | 1.02 | 0.282 | 9.4E-01 |
| PA4440  | HLA class I histocompatibility antigen, DP beta 1 chain                                       | 1 | 1.02 | NA    | NA      |
| P07237  | Protein disulfide-isomerase                                                                   | 5 | 1.02 | 0.082 | 8.2E-01 |
| PA6588  | Alamine-rRNA ligase, cytoplasmic                                                              | 1 | 1.02 | NA    | NA      |
| P03688  | Splicing factor LQAF 65 kDa subunit                                                           | 4 | 1.02 | 0.065 | 8.4E-01 |
| P01889  | HLA class I histocompatibility antigen, B-7 alpha chain                                       | 1 | 1.02 | NA    | NA      |
| Q13383  | Splicing factor 3B subunit 1                                                                  | 2 | 1.02 | NA    | NA      |
| Q8H101  | Gamma-rich repeat-containing protein 47                                                       | 5 | 1.02 | 0.245 | 9.5E-01 |
| P30519  | Heme oxygenase 2                                                                              | 4 | 1.01 | 0.101 | 8.9E-01 |
| P11488  | Heme oxygenase 2                                                                              | 2 | 1.01 | NA    | NA      |
| P36955  | Pigment epithelium-derived factor                                                             | 1 | 1.01 | NA    | NA      |
| Q8H101  | Prefoldin subunit 2                                                                           | 2 | 1.01 | NA    | NA      |
| P51368  | 26S ribosomal protein S28, mitochondrial                                                      | 1 | 1.01 | NA    | NA      |
| Q69R08  | Redox-regulatory protein FAM213A                                                              | 5 | 1.01 | 0.090 | 9.2E-01 |
| Q8Z028  | Endoplasmic reticulum aminopeptidase 1                                                        | 2 | 1.01 | NA    | NA      |
| P20714  | Cytochrome c oxidase subunit 6A, mitochondrial                                                | 5 | 1.01 | 0.135 | 9.5E-01 |
| Q8Y1W2  | Tetrapeptide repeat protein 40                                                                | 1 | 1.01 | NA    | NA      |
| Q8W726  | RNA-binding protein 12                                                                        | 2 | 1.00 | NA    | NA      |
| Q13023  | Reticulocalbin-1                                                                              | 1 | 1.00 | 0.247 | 9.8E-01 |
| P62444  | 40S ribosomal protein S15a                                                                    | 4 | 1.00 | 0.058 | 9.5E-01 |
| Q8H101  | Methylcronyl-CoA carboxylase beta chain, mitochondrial                                        | 1 | 1.00 | NA    | NA      |
| Q6AA69  | Regulator complex protein LAMTOR1                                                             | 2 | 1.00 | NA    | NA      |
| Q7K274  | Staphylococcal nuclease domain-containing protein 1                                           | 5 | 1.00 | 0.077 | 9.8E-01 |
| Q8H101  | Phosphatidylinoside phosphatase SAC1                                                          | 4 | 1.00 | 0.134 | 9.8E-01 |
| Q13162  | Peroxiredoxin-4                                                                               | 5 | 1.00 | 0.126 | 9.9E-01 |
| Q12084  | Protein disulfide-isomerase A6                                                                | 5 | 1.00 | 0.118 | 9.9E-01 |
| Q14789  | Golgin subfamily B member 1                                                                   | 1 | 1.00 | NA    | NA      |
| O00410  | Imporin-5                                                                                     | 1 | 1.00 | NA    | NA      |
| Q8P297  | Succinyl-CoA ligase (ADP-forming) subunit beta, mitochondrial                                 | 4 | 1.00 | 0.076 | 9.7E-01 |
| Q8H101  | 3-hydroxyacyl-CoA dehydrogenase type-2                                                        | 9 | 1.00 | 0.150 | 9.9E-01 |
| Q15029  | 116 kDa U5 small nuclear ribonucleoprotein component                                          | 2 | 0.99 | NA    | NA      |
| P01225  | Ras-related protein Rap-2b                                                                    | 4 | 0.99 | 0.071 | 9.2E-01 |
| P23266  | Phosphatidylinositol 4-kinase alpha                                                           | 4 | 0.99 | NA    | NA      |
| P35637  | RNA-binding protein FUS                                                                       | 4 | 0.99 | 0.138 | 9.5E-01 |
| O75521  | Eryoyl-CoA delta isomerase 2, mitochondrial                                                   | 3 | 0.99 | 0.129 | 9.5E-01 |
| P68871  | Hemoglobin subunit beta                                                                       | 5 | 0.99 | 0.240 | 8.7E-01 |
| Q9Y318  | 60S ribosomal protein L38                                                                     | 5 | 0.99 | 0.063 | 8.8E-01 |
| Q16851  | UTP-glucose-1-phosphate uridylyltransferase                                                   | 3 | 0.99 | 0.159 | 9.3E-01 |
| P29966  | Myristoylated alanine-rich C-kinase substrate                                                 | 5 | 0.98 | 0.101 | 8.8E-01 |
| Q69W27  | Nuclear pore complex protein Nup85                                                            | 1 | 0.98 | NA    | NA      |
| PA7987  | Glutamine-rRNA ligase                                                                         | 1 | 0.98 | NA    | NA      |
| Q9Y512  | Sorting and assembly machinery component 50 homolog                                           | 1 | 0.98 | NA    | NA      |
| PA3243  | Mafin-3                                                                                       | 2 | 0.98 | NA    | NA      |
| P62316  | Small nuclear ribonucleoprotein Sm D2                                                         | 2 | 0.98 | NA    | NA      |
| P13473  | Lysosome-associated membrane glycoprotein 2                                                   | 2 | 0.98 | NA    | NA      |
| P65107  | Hitgin beta-2                                                                                 | 3 | 0.98 | 0.245 | 9.4E-01 |
| P61026  | Ras-related protein Rab-10                                                                    | 5 | 0.98 | 0.075 | 7.8E-01 |
| P69957  | Dihydrodipicolinate synthase component of 2-oxoglutarate dehydrogenase complex, mitochondrial | 5 | 0.98 | 0.115 | 8.5E-01 |
| P14827  | Cytochrome b-c1 complex subunit 7                                                             | 5 | 0.98 | 0.088 | 7.8E-01 |
| O85302  | Peptidyl prolyl cis-trans isomerase FKBP9                                                     | 2 | 0.97 | NA    | NA      |
| PA2765  | 3-ketoacyl-CoA thioesterase, mitochondrial                                                    | 5 | 0.97 | 0.080 | 7.4E-01 |
| P66559  | Pyruvate dehydrogenase E1 component subunit alpha, somatic form, mitochondrial                | 3 | 0.97 | 0.113 | 8.2E-01 |
| Q96905  | Transmembrane 9 superfamily member 2                                                          | 1 | 0.97 | NA    | NA      |
| P60228  | Eukaryotic translation initiation factor 3 subunit E                                          | 2 | 0.97 | NA    | NA      |
| Q8V172  | Protein ANNAK2                                                                                | 2 | 0.97 | NA    | NA      |
| P62333  | 26S protease regulatory subunit 10B                                                           | 1 | 0.97 | NA    | NA      |
| P68134  | Rho-related GTP-binding protein RhoC                                                          | 3 | 0.96 | 0.181 | 8.6E-01 |
| P17931  | Galectin-3                                                                                    | 3 | 0.96 | 0.337 | 9.1E-01 |
| P17980  | 26S protease regulatory subunit 6A                                                            | 3 | 0.96 | 0.200 | 8.6E-01 |
| P13169  | Dnal homolog subfamily A member 1                                                             | 3 | 0.96 | 0.077 | 6.6E-01 |
| Q5C0E8  | Protein Langkang                                                                              | 1 | 0.96 | NA    | NA      |
| Q69K61  | Vacuolar protein sorting-associated protein 35                                                | 3 | 0.96 | 0.025 | 2.4E-01 |
| PA7885  | Cytochrome b-c1 complex subunit 10a, mitochondrial                                            | 5 | 0.96 | 0.119 | 8.9E-01 |
| P11021  | 78 kDa glucose-regulated protein                                                              | 5 | 0.96 | 0.068 | 5.8E-01 |
| P65884  | Eukaryotic translation initiation factor 3 subunit B                                          | 4 | 0.96 | 0.148 | 7.9E-01 |
| PA0227  | T-complex protein 1 subunit zeta                                                              | 5 | 0.96 | 0.108 | 7.3E-01 |
| P53618  | Coatomer subunit beta                                                                         | 4 | 0.95 | 0.088 | 6.3E-01 |
| Q6N917  | Sorting nexin-6                                                                               | 4 | 0.95 | 0.072 | 5.7E-01 |
| Q14108  | Lysosome membrane protein 2                                                                   | 6 | 0.95 | 0.166 | 6.3E-01 |
| Q6C119  | EF-hand domain-containing protein D2                                                          | 1 | 0.95 | NA    | NA      |
| P60763  | Ras-related C3 botulinum toxin substrate 3                                                    | 1 | 0.95 | NA    | NA      |
| P10515  | Dihydrodipicolinate synthase component of pyruvate dehydrogenase complex, mitochondrial       | 4 | 0.95 | 0.045 | 3.7E-01 |
| Q8NY12  | UDP-glucose glycoprotein glucosyltransferase 1                                                | 3 | 0.95 | 0.122 | 7.3E-01 |
| Q16891  | Mitochondrial inner membrane protein                                                          | 5 | 0.95 | 0.105 | 6.6E-01 |
| P26038  | Moesin                                                                                        | 5 | 0.95 | 0.080 | 5.7E-01 |
| P27824  | Calnesin                                                                                      | 5 | 0.95 | 0.122 | 7.0E-01 |
| P78344  | Eukaryotic translation initiation factor 4 gamma 2                                            | 1 | 0.95 | NA    | NA      |
| O8UMX5  | Neudasin                                                                                      | 2 | 0.95 | NA    | NA      |
| P27144  | Adenylylate kinase 4, mitochondrial                                                           | 1 | 0.95 | NA    | NA      |
| Q18698  | 2,4-dioxygluconate reductase, mitochondrial                                                   | 4 | 0.95 | 0.239 | 8.3E-01 |
| PA6881  | Neslin                                                                                        | 5 | 0.95 | 0.328 | 8.7E-01 |
| Q00577  | Transcriptional activator protein Pur-alpha                                                   | 2 | 0.95 | NA    | NA      |
| Q8H101  | Regulator of microtubule dynamics protein 3                                                   | 1 | 0.94 | NA    | NA      |
| Q80X00  | EMLN-2                                                                                        | 1 | 0.94 | NA    | NA      |
| Q14683  | Structural maintenance of chromosomes protein 1A                                              | 5 | 0.94 | 0.038 | 1.8E-01 |
| Q69V06  | Transmembrane emp24 domain-containing protein 9                                               | 1 | 0.94 | NA    | NA      |
| P01586  | Transforming protein RhoA                                                                     | 2 | 0.94 | NA    | NA      |
| Q66117  | Protein disulfide-isomerase TMX3                                                              | 1 | 0.94 | NA    | NA      |
| P35606  | Coatomer subunit beta'                                                                        | 1 | 0.94 | NA    | NA      |
| Q13825  | Methylglucosyl-CoA hydrolase, mitochondrial                                                   | 1 | 0.94 | NA    | NA      |
| Q18785  | NADH dehydrogenase [ubiquinone] 1 alpha subcomplex subunit 9, mitochondrial                   | 3 | 0.93 | 0.053 | 3.3E-01 |
| Q63050  | V-type proton ATPase 116 kDa subunit a isoform 1                                              | 4 | 0.93 | 0.277 | 8.2E-01 |
| P71615  | Dnal homolog subfamily C member 13                                                            | 2 | 0.93 | NA    | NA      |
| P53688  | 60S ribosomal protein L30                                                                     | 5 | 0.93 | NA    | NA      |
| Q8V629  | Cytoplasmic dynein 1 light intermediate chain 1                                               | 2 | 0.93 | NA    | NA      |
| Q60900  | Vacuolar protein sorting-associated protein 29                                                | 1 | 0.93 | NA    | NA      |
| Q9P040  | NADH dehydrogenase [ubiquinone] 1 alpha subcomplex subunit 13                                 | 1 | 0.92 | NA    | NA      |
| P131843 | Heterogeneous nuclear ribonucleoprotein H                                                     | 2 | 0.92 | NA    | NA      |
| PA6978  | Glycoylin-1                                                                                   | 1 | 0.92 | NA    | NA      |
| PA9368  | T-complex protein 1 subunit gamma                                                             | 5 | 0.92 | 0.058 | 2.1E-01 |
| P61457  | Pten-4 alpha carbonic anhydrase dehydratase                                                   | 1 | 0.92 | NA    | NA      |
| P00005  | Ig lambda-2 chain C region                                                                    | 4 | 0.92 | 0.271 | 7.7E-01 |
| Q27227  | E3 ubiquitin-protein ligase HUWE1                                                             | 2 | 0.91 | NA    | NA      |
| P11279  | Lysosome-associated membrane glycoprotein 1                                                   | 1 | 0.91 | NA    | NA      |
| Q76915  | PKA1 family protein 3                                                                         | 0 | 0.91 | 0.265 | 7.6E-01 |
| Q8LUX7  | Adipocyte enhancer-binding protein 1                                                          | 1 | 0.91 | NA    | NA      |
| P15435  | Protein phosphatase 1 regulatory subunit 7                                                    | 1 | 0.91 | NA    | NA      |
| P02990  | T-complex protein 1 subunit beta                                                              | 1 | 0.91 | 0.062 | 2.6E-01 |
| Q60783  | General vesicular transport factor p115                                                       | 1 | 0.91 | NA    | NA      |
| Q9Y224  | LPRF566 protein C1-101/106                                                                    | 1 | 0.90 | NA    | NA      |
| P02774  | Vitamin D-binding protein                                                                     | 4 | 0.90 | 0.187 | 5.9E-01 |
| Q6P567  | Acylphosphatase FAHD1, mitochondrial                                                          | 1 | 0.90 | NA    | NA      |
| Q13200  | 26S proteasome non-ATPase regulatory subunit 2                                                | 5 | 0.90 | 0.102 | 3.7E-01 |
| P62805  | Histone H4                                                                                    | 5 | 0.90 | 0.062 | 1.6E-01 |
| P56584  | Trifunctional enzyme subunit beta, mitochondrial                                              | 5 | 0.90 | 0.255 | 7.0E-01 |
| Q18665  | Histone H3.1                                                                                  | 4 | 0.90 | 0.192 | 6.1E-01 |
| O43442  | 26S proteasome non-ATPase regulatory subunit 3                                                | 4 | 0.89 | 0.047 | 9.6E-02 |
| P35573  | Glyogen debranching enzyme                                                                    | 1 | 0.89 | NA    | NA      |
| Q8A0E7  | Structural maintenance of chromosomes protein 3                                               | 3 | 0.89 | 0.063 | 2.1E-01 |
| Q71D03  | Histone H3.2                                                                                  | 1 | 0.89 | NA    | NA      |

Table S17 Average Non-Metastatic Tumors

|        |                                                                              |   |      |       |         |
|--------|------------------------------------------------------------------------------|---|------|-------|---------|
| P63092 | Guanine nucleotide-binding protein G(s) subunit alpha isoform short          | 1 | 0.89 | NA    | NA      |
| Q6Z270 | Abi interactor 1                                                             | 1 | 0.89 | NA    | NA      |
| Q9Y277 | Voltage-dependent anion-selective channel protein 3                          | 2 | 0.89 | NA    | NA      |
| O02003 | AP-3 complex subunit beta 1                                                  | 2 | 0.89 | NA    | NA      |
| P03080 | Glutathione reductase, mitochondrial                                         | 5 | 0.89 | 0.153 | 5.7E-01 |
| Q9Y223 | Decoxynucleoside triphosphate triphosphohydrolase SAMHD1                     | 3 | 0.88 | 0.091 | 3.1E-01 |
| P06991 | T-complex protein 1 subunit delta                                            | 5 | 0.88 | 0.042 | 4.3E-02 |
| P55072 | Transitional endoplasmic reticulum ATPase                                    | 5 | 0.88 | 0.028 | 1.1E-02 |
| P67870 | Casein kinase II subunit beta                                                | 3 | 0.88 | 0.189 | 5.7E-01 |
| O03225 | Phosphate carrier protein, mitochondrial                                     | 5 | 0.88 | 0.045 | 4.4E-02 |
| P04173 | Superoxide dismutase [Mn], mitochondrial                                     | 5 | 0.88 | 0.025 | 6.9E-02 |
| P64659 | Vesicle-fusing ATPase                                                        | 2 | 0.88 | NA    | NA      |
| Q86526 | Endoplasmic reticulum protein 44                                             | 5 | 0.88 | 0.111 | 3.6E-01 |
| P24539 | ATP synthase F0) complex subunit B1, mitochondrial                           | 5 | 0.88 | 0.048 | 5.0E-02 |
| P48843 | T-complex protein 1 subunit epsilon                                          | 5 | 0.87 | 0.082 | 9.9E-02 |
| P49756 | RNA-binding protein 25                                                       | 1 | 0.87 | NA    | NA      |
| Q15075 | Early endosome antigen 1                                                     | 2 | 0.87 | NA    | NA      |
| P01876 | Ig alpha-1 chain C region                                                    | 5 | 0.87 | 0.147 | 4.1E-01 |
| P11050 | Cytochrome b-c1 complex subunit 1, mitochondrial                             | 5 | 0.87 | 0.119 | 3.1E-01 |
| O60313 | Dynamitin-like 120 kDa protein, mitochondrial                                | 5 | 0.87 | 0.060 | 7.9E-02 |
| P03882 | Galectin-1                                                                   | 5 | 0.87 | 0.277 | 6.4E-01 |
| P09643 | Z <sup>2</sup> -cyclic nucleotide 3'-phosphodiesterase                       | 5 | 0.87 | 0.136 | 3.6E-01 |
| P35221 | Catenin alpha-1                                                              | 4 | 0.87 | 0.103 | 2.8E-01 |
| P49593 | Protein phosphatase 1F                                                       | 2 | 0.87 | NA    | NA      |
| Q14258 | E3 ubiquitin/SCF1 ligase TRIM25                                              | 3 | 0.87 | 0.113 | 3.0E-01 |
| P01834 | Ig kappa chain C region                                                      | 5 | 0.86 | 0.160 | 4.2E-01 |
| Q86932 | T-complex protein 1 subunit eta                                              | 5 | 0.86 | 0.078 | 1.3E-01 |
| P49039 | Trifunctional enzyme subunit alpha, mitochondrial                            | 5 | 0.86 | 0.152 | 4.7E-01 |
| P04043 | Cytochrome c oxidase subunit 2                                               | 2 | 0.86 | NA    | NA      |
| Q17632 | 26S proteasome non-ATPase regulatory subunit 10                              | 1 | 0.86 | NA    | NA      |
| P18859 | ATP synthase-coupling factor 6, mitochondrial                                | 3 | 0.86 | 0.090 | 2.3E-01 |
| A0FGP8 | Extended syntenin2-like 2                                                    | 2 | 0.86 | NA    | NA      |
| P03162 | Retinal dehydrogenase 1                                                      | 4 | 0.86 | 0.325 | 6.6E-01 |
| Q9JH08 | Sepsin-9                                                                     | 5 | 0.86 | 0.028 | 5.1E-03 |
| Q12965 | Unconventional myosin-1e                                                     | 2 | 0.86 | NA    | NA      |
| Q15523 | ATP-dependent RNA helicase DDX3Y                                             | 1 | 0.85 | NA    | NA      |
| P49748 | Very long-chain specific acyl-CoA dehydrogenase, mitochondrial               | 5 | 0.85 | 0.118 | 2.5E-01 |
| Q62498 | ATP-dependent RNA helicase GDX1                                              | 4 | 0.85 | 0.138 | 3.1E-01 |
| P54577 | Tyrosine-RNA ligase, cytoplasmic                                             | 1 | 0.85 | NA    | NA      |
| P04843 | Dolichyl-diphosphooligosaccharide-protein glycosyltransferase subunit 1      | 5 | 0.85 | 0.104 | 1.9E-01 |
| Q89965 | Endoplasmic reticulum-Golgi intermediate compartment protein 1               | 3 | 0.85 | 0.094 | 3.2E-01 |
| Q53G00 | Estradiol 17-beta-dehydrogenase 12                                           | 5 | 0.85 | 0.186 | 4.2E-01 |
| P09525 | Annexin A4                                                                   | 5 | 0.84 | 0.082 | 1.1E-01 |
| Q13661 | Dynactin subunit 2                                                           | 5 | 0.84 | 0.088 | 1.2E-01 |
| P13867 | CD59 glycoprotein                                                            | 5 | 0.84 | 0.144 | 3.0E-01 |
| P39656 | Dolichyl-diphosphooligosaccharide-protein glycosyltransferase 48 kDa subunit | 5 | 0.84 | 0.073 | 8.0E-02 |
| Q84988 | Guanine nucleotide-binding protein G12(G12R(G)) subunit gamma-12             | 2 | 0.84 | NA    | NA      |
| Q7LSN1 | COP9 signalosome complex subunit 6                                           | 5 | 0.84 | 0.053 | 3.1E-02 |
| P03953 | Cell division control protein 42 homolog                                     | 3 | 0.84 | 0.118 | 2.7E-01 |
| Q49425 | Guaninase kidney isoform, mitochondrial                                      | 1 | 0.84 | NA    | NA      |
| O60841 | Eukaryotic translation initiation factor 5B                                  | 1 | 0.84 | NA    | NA      |
| P56876 | Histone H2B type 1-D                                                         | 1 | 0.84 | NA    | NA      |
| P35992 | Protein transport protein Sec24C                                             | 1 | 0.84 | NA    | NA      |
| P51812 | Ribosomal protein S6 kinase alpha-3                                          | 4 | 0.83 | 0.151 | 3.2E-01 |
| P47756 | F-actin-capping protein subunit beta                                         | 5 | 0.83 | 0.081 | 1.0E-01 |
| P09496 | Claflavin light chain A                                                      | 5 | 0.83 | 0.044 | 1.4E-02 |
| P04844 | Dolichyl-diphosphooligosaccharide-protein glycosyltransferase subunit 2      | 5 | 0.83 | 0.108 | 1.7E-01 |
| Q2642  | Nicotin                                                                      | 1 | 0.83 | NA    | NA      |
| O60608 | Mitochondrial import receptor subunit TOM40 homolog                          | 1 | 0.83 | NA    | NA      |
| Q69564 | Protein S100-A12                                                             | 5 | 0.83 | 0.158 | 3.0E-01 |
| Q81653 | Cell cycle and apoptosis regulator protein 2                                 | 1 | 0.83 | NA    | NA      |
| P30508 | HLA class I histocompatibility antigen, Cw-12 alpha chain                    | 1 | 0.83 | NA    | NA      |
| P52907 | F-actin-capping protein subunit alpha-1                                      | 2 | 0.83 | NA    | NA      |
| O60716 | Catenin delta-1                                                              | 5 | 0.82 | 0.115 | 1.7E-01 |
| P35396 | ATP-citrate synthase                                                         | 2 | 0.82 | NA    | NA      |
| Q82283 | Aldehyde dehydrogenase family 16 member A1                                   | 1 | 0.82 | NA    | NA      |
| Q9Y4F1 | FERM, RhoGEF and plexstrin domain-containing protein 1                       | 1 | 0.82 | NA    | NA      |
| Q07065 | Receptor expression-enhancing protein 5                                      | 5 | 0.82 | 0.119 | 1.7E-01 |
| Q9P048 | Core histone macroH2A.2                                                      | 3 | 0.82 | 0.158 | 3.3E-01 |
| P28065 | Proteasome subunit beta type-9                                               | 1 | 0.82 | NA    | NA      |
| P62909 | 28S ribosomal protein S36, mitochondrial                                     | 1 | 0.82 | NA    | NA      |
| P31178 | Kinesin-1 heavy chain                                                        | 3 | 0.81 | 0.102 | 1.8E-01 |
| Q9Y552 | Serine/threonine-protein kinase MRCK beta                                    | 1 | 0.81 | NA    | NA      |
| P46432 | Cabain small subunit 1                                                       | 4 | 0.81 | 0.122 | 1.9E-01 |
| Q43077 | Alpha-actinin-4                                                              | 5 | 0.81 | 0.065 | 3.4E-02 |
| P49420 | Alpha-soluble NSF attachment protein                                         | 4 | 0.81 | 0.138 | 2.3E-01 |
| Q86946 | Endophilin B2                                                                | 4 | 0.81 | NA    | NA      |
| P51116 | Fragile X mental retardation syndrome-related protein 2                      | 2 | 0.81 | NA    | NA      |
| P52209 | Nucleosome assembly protein 1-like 1                                         | 1 | 0.81 | NA    | NA      |
| Q9H480 | E1H domain-containing protein 1                                              | 1 | 0.81 | NA    | NA      |
| O15212 | Prefoldin subunit 6                                                          | 2 | 0.80 | NA    | NA      |
| Q14344 | Guanine nucleotide-binding protein subunit alpha-13                          | 4 | 0.80 | 0.076 | 6.0E-02 |
| P07384 | Calpain-1 catalytic subunit                                                  | 5 | 0.80 | 0.141 | 2.6E-01 |
| Q9H223 | E1H domain-containing protein 4                                              | 2 | 0.80 | NA    | NA      |
| P07305 | Histone H1 D                                                                 | 5 | 0.80 | 0.193 | 3.0E-01 |
| P14625 | Endoplasmic                                                                  | 1 | 0.79 | 0.097 | 7.4E-02 |
| P00918 | Carbonic anhydrase 2                                                         | 1 | 0.79 | NA    | NA      |
| Q69816 | Tumor susceptibility gene 101 protein                                        | 1 | 0.79 | NA    | NA      |
| P03055 | Histone H2A.Z                                                                | 5 | 0.79 | 0.063 | 2.1E-02 |
| P13667 | Protein disulfide-isomerase A4                                               | 5 | 0.79 | 0.132 | 1.5E-01 |
| Q8H205 | Estradiol 17-beta-dehydrogenase 11                                           | 1 | 0.79 | NA    | NA      |
| P26196 | Probable ATP-dependent RNA helicase DDX6                                     | 4 | 0.79 | 0.067 | 3.8E-02 |
| P62714 | Serine/threonine-protein phosphatase 2A catalytic subunit beta isoform       | 1 | 0.79 | NA    | NA      |
| Q07865 | Cytoskeleton-associated protein 4                                            | 5 | 0.79 | 0.103 | 9.8E-02 |
| O84832 | Unconventional myosin-1d                                                     | 5 | 0.79 | 0.224 | 3.5E-01 |
| O65168 | NADH dehydrogenase [ubiquinone] 1 beta subcomplex subunit 4                  | 1 | 0.79 | NA    | NA      |
| Q11518 | Adenyl cyclase-associated protein 1                                          | 1 | 0.79 | NA    | NA      |
| Q15842 | Zyxin                                                                        | 4 | 0.79 | 0.168 | 2.5E-01 |
| Q8NF14 | Fusative protein FAM10A5                                                     | 1 | 0.79 | NA    | NA      |
| Q8J4J0 | Aspartyl aminopeptidase                                                      | 2 | 0.79 | NA    | NA      |
| P27361 | Mitogen-activated protein kinase 3                                           | 1 | 0.78 | NA    | NA      |
| P02647 | Apolipoprotein A-I                                                           | 5 | 0.78 | 0.207 | 4.1E-01 |
| P04640 | Catalase                                                                     | 5 | 0.78 | 0.159 | 1.9E-01 |
| P17967 | T-complex protein 1 subunit alpha                                            | 5 | 0.78 | 0.048 | 6.6E-03 |
| Q93009 | Ubiquitin carboxyl-terminal hydrolase 7                                      | 4 | 0.77 | 0.028 | 2.6E-03 |
| P35321 | Coatomer subunit alpha                                                       | 5 | 0.77 | 0.069 | 1.9E-02 |
| O00571 | ATP-dependent RNA helicase DDX3X                                             | 1 | 0.77 | NA    | NA      |
| P11069 | Alpha-1 antitrypsin                                                          | 5 | 0.77 | 0.142 | 1.4E-01 |
| P55600 | Exportin-2                                                                   | 3 | 0.77 | 0.120 | 1.6E-01 |
| P31842 | Heterogeneous nuclear ribonucleoprotein H3                                   | 3 | 0.76 | 0.209 | 3.3E-01 |
| Q81G28 | Translocation protein SEC23 homolog                                          | 1 | 0.76 | NA    | NA      |
| Q07157 | Tight junction protein ZO-1                                                  | 1 | 0.76 | NA    | NA      |
| P03207 | Glutamate dehydrogenase 1, mitochondrial                                     | 5 | 0.76 | 0.081 | 1.1E-02 |
| P06969 | Phosphorylated hydroxytryptophan oxidase, mitochondrial                      | 1 | 0.76 | NA    | NA      |
| P35241 | Radixin                                                                      | 1 | 0.76 | NA    | NA      |
| Q80608 | Sotkin and SH3 domain-containing protein 1                                   | 1 | 0.76 | NA    | NA      |
| Q03252 | Lamin-B2                                                                     | 5 | 0.76 | 0.082 | 2.7E-02 |
| Q15149 | Plectin                                                                      | 5 | 0.76 | 0.159 | 1.5E-01 |
| P49419 | Alpha-aminoadipic semialdehyde dehydrogenase                                 | 1 | 0.76 | NA    | NA      |
| P02652 | Apolipoprotein A-II                                                          | 5 | 0.75 | 0.216 | 2.6E-01 |
| Q14558 | Phosphoribosyl pyrophosphate synthase-associated protein 1                   | 2 | 0.75 | NA    | NA      |
| P44937 | Yonke homolog                                                                | 3 | 0.75 | 0.066 | 9.9E-02 |
| Q9Y4G6 | Talin-2                                                                      | 1 | 0.75 | NA    | NA      |
| Q9Y305 | Acyl-coenzyme A thioesterase 9, mitochondrial                                | 1 | 0.75 | NA    | NA      |
| Q13508 | COP9 signalosome complex subunit 1                                           | 5 | 0.75 | NA    | NA      |
| Q12979 | Aspartylglucosylaminidase                                                    | 5 | 0.75 | 0.091 | 3.2E-02 |
| O14735 | CDP-diacylglycerol-inositol 3-phosphatidylinositol transferase               | 1 | 0.73 | NA    | NA      |
| Q9Y390 | RNA-splicing ligase RPL3D homolog                                            | 4 | 0.73 | 0.079 | 2.8E-02 |
| Q69733 | Nucleosome assembly protein 1-like 4                                         | 1 | 0.72 | NA    | NA      |
| P44683 | ATP-dependent DNA helicase C1                                                | 1 | 0.72 | NA    | NA      |
| Q04637 | Eukaryotic translation initiation factor 4 gamma 1                           | 2 | 0.72 | NA    | NA      |
| P61163 | Alpha-centractin                                                             | 2 | 0.72 | NA    | NA      |
| P43307 | Translocin-associated protein subunit alpha                                  | 5 | 0.72 | 0.075 | 1.2E-02 |
| Q71U36 | Tubulin alpha-1A chain                                                       | 2 | 0.72 | NA    | NA      |
| Q15653 | Synaptonemal complex protein 1                                               | 1 | 0.72 | NA    | NA      |
| Q8NKL1 | Calcium-binding mitochondrial carrier protein SCaMC-1                        | 1 | 0.72 | 0.101 | 4.6E-02 |
| P03803 | Complement factor H                                                          | 1 | 0.71 | NA    | NA      |
| Q8TD19 | Serine/threonine-protein kinase Nek9                                         | 1 | 0.71 | NA    | NA      |
| P17655 | Catalin-2 catalytic subunit                                                  | 4 | 0.71 | 0.047 | 5.2E-03 |
| O65299 | NADH dehydrogenase [ubiquinone] 1 alpha subcomplex subunit 10, mitochondrial | 1 | 0.71 | NA    | NA      |
| P53208 | S-phase kinase-associated protein 1                                          | 2 | 0.71 | NA    | NA      |
| Q96970 | Immunoglobulin superfamily member 8                                          | 2 | 0.70 | NA    | NA      |
| P60709 | Actin, cytoplasmic 1                                                         | 4 | 0.70 | 0.089 | 2.8E-02 |
| Q8N245 | CDC58H iron-sulfur domain-containing protein 1                               | 1 | 0.70 | NA    | NA      |
| Q75131 | Copine-3                                                                     | 3 | 0.70 | 0.178 | 1.8E-01 |
| O64979 | Protein transport protein Sec3A                                              | 4 | 0.70 | 0.087 | 2.8E-02 |
| Q93055 | POZ and LIM domain protein 3                                                 | 1 | 0.70 | NA    | NA      |
| P05023 | Sodium/potassium-transporting ATPase subunit alpha-1                         | 5 | 0.69 | 0.068 | 5.9E-03 |
| Q8VJH4 | Programmed cell death 6-interacting protein                                  | 3 | 0.69 | 0.025 | 4.5E-03 |
| Q8JH53 | Prenyltransferase 1                                                          | 3 | 0.69 | 0.084 | 0.2E-02 |
| P67936 | Topoyosin alpha-4 chain                                                      | 5 | 0.69 | 0.156 | 7.5E-02 |
| O60884 | DnaL homolog subfamily A member 2                                            | 1 | 0.69 | NA    | NA      |
| P13861 | cAMP-dependent protein kinase type II-alpha regulatory subunit               | 5 | 0.69 | 0.072 | 6.4E-03 |
| P49450 | Signal recognition particle 9 kDa protein                                    | 2 | 0.68 | NA    | NA      |
| Q84006 | 5'-3' exoribonuclease 2                                                      | 1 | 0.68 | NA    | NA      |
| Q8X12  | Cell division cycle and apoptosis regulator protein 1                        | 2 | 0.68 | NA    | NA      |
| P12235 | ADP/ATP translocase 1                                                        | 3 | 0.68 | 0.095 | 5.6E-02 |
| P11769 | Beta-2-microglobulin                                                         | 4 | 0.68 | 0.250 | 2.2E-01 |
| Q84444 | Charged multivesicular body protein 4b                                       | 2 | 0.68 | NA    | NA      |
| Q66865 | NG2(N)G-dimethylarginine dimethylaminohydrolase 2                            | 4 | 0.68 | 0.123 | 5.0E-02 |
| Q14203 | Dynactin subunit 1                                                           | 6 | 0.68 | 0.116 | 2.8E-02 |
| Q16775 | Hydroxyacylglutathione hydrolase, mitochondrial                              | 1 | 0.68 | NA    | NA      |
| P06689 | Histone H2B type 1-J                                                         | 5 | 0.68 | 0.143 | 5.3E-02 |
| Q02218 | 2-nicotinate dehydrogenase, mitochondrial                                    | 5 | 0.67 | 0.097 | 6.5E-02 |
| O00284 | Membrane-associated progesterone receptor component 1                        | 5 | 0.67 | 0.157 | 6.5E-02 |
| Q05682 | Caldesmon                                                                    | 5 | 0.67 | 0.135 | 4.2E-02 |
| P63261 | Actin, cytoplasmic 2                                                         | 1 | 0.67 | NA    | NA      |
| P17568 | NADH dehydrogenase [ubiquinone] 1 beta subcomplex subunit 7                  | 1 | 0.67 | NA    | NA      |
| Q8H029 | Adipocyte plasma membrane-associated protein                                 | 4 | 0.67 | 0.138 | 6.2E-02 |
| O75844 | CAAX prenyl transferase 1 homolog                                            | 1 | 0.67 | NA    | NA      |
| P06174 | Complement decay-accelerating factor                                         | 2 | 0.66 | NA    | NA      |
| P42025 | Beta-centractin                                                              | 2 | 0.66 | NA    | NA      |
| Q92973 | Transportin-1                                                                | 3 | 0.66 | 0.047 | 1.2E-02 |
| Q13576 | Cytoplasmic FMR1-interacting protein 1                                       | 2 | 0.65 | NA    | NA      |
| P43121 | Cell surface glycoprotein MUC18                                              | 1 | 0.65 | 0.165 | 9.1E-02 |
| P16425 | NADPH-cytochrome P450 reductase                                              | 1 | 0.65 | NA    | NA      |
| Q97411 | Hypoxia up-regulated protein 1                                               | 3 | 0.64 | 0.195 | 1.5E-01 |
| P16615 | Sarcoplasmic-eroplasmic reticulum calcium ATPase 2                           | 5 | 0.64 | 0.110 | 1.6E-02 |
| Q14204 | Cytoplasmic dynein 1 heavy chain 1                                           | 5 | 0.64 | 0.067 | 2.8E-03 |
| Q14656 | Transmembrane glycoprotein NMB                                               | 5 | 0.64 | 0.409 | 3.4E-01 |
| P35222 | Catenin beta-1                                                               | 5 | 0.64 | 0.113 | 1.7E-02 |
| P07437 | Tubulin beta chain                                                           | 2 | 0.64 | NA    | NA      |
| P07603 | Protein S100-A6                                                              | 2 | 0.63 | NA    | NA      |
| Q9Y6N5 | Sulfide quinone oxidoreductase, mitochondrial                                | 5 | 0.62 | 0.100 | 9.1E-03 |
| Q9Y240 | C-type lectin domain family 11 member A                                      | 1 | 0.62 | NA    | NA      |
| Q73246 | Calcium-binding mitochondrial carrier protein Aralar1                        | 4 | 0.62 | 0.114 | 2.4E-02 |
| P05091 | Aldehyde dehydrogenase, mitochondrial                                        | 4 | 0.61 | 0.098 | 1.5E-02 |

Table S17 Average Non-Metastatic Tumors

|        |                                                                            |   |      |       |         |
|--------|----------------------------------------------------------------------------|---|------|-------|---------|
| P00387 | NADH cytochrome b5 reductase 3                                             | 5 | 0.81 | 0.070 | 2.2E-03 |
| P00965 | Anexin A11                                                                 | 5 | 0.81 | 0.104 | 9.3E-03 |
| P62873 | Guanine nucleotide-binding protein G(I)/G(S)/G(T) subunit beta-1           | 2 | 0.81 | NA    | NA      |
| Q62959 | Sepsin-8                                                                   | 1 | 0.80 | NA    | NA      |
| P02511 | Alpha-crystallin B chain                                                   | 5 | 0.80 | 0.230 | 9.2E-02 |
| P06396 | Gelsolin                                                                   | 5 | 0.80 | 0.244 | 1.1E-01 |
| Q2VY93 | Putative eukaryotic translation initiation factor 2 subunit 3-like protein | 1 | 0.80 | NA    | NA      |
| Q9NQD3 | Retioulon-4                                                                | 5 | 0.80 | 0.202 | 6.9E-02 |
| P17643 | 5,6-dihydroxyindole-2-carboxylic acid oxidase                              | 4 | 0.79 | 0.627 | 4.7E-01 |
| P04947 | Clathrin light chain B                                                     | 4 | 0.79 | 0.062 | 7.6E-03 |
| Q96023 | Tubulin alpha-1C chain                                                     | 5 | 0.79 | 0.103 | 3.6E-02 |
| Q10567 | AP-1 complex subunit beta-1                                                | 2 | 0.79 | NA    | NA      |
| P05070 | Dynamin-2                                                                  | 1 | 0.79 | NA    | NA      |
| Q14650 | Myosin regulatory light chain 12B                                          | 5 | 0.78 | 0.140 | 1.8E-02 |
| P68371 | Tubulin beta-4B chain                                                      | 3 | 0.78 | 0.083 | 2.3E-02 |
| Q08722 | Leukocyte surface antigen CD47                                             | 3 | 0.78 | 0.009 | 2.1E-04 |
| P21589 | D'-nucleotidase                                                            | 3 | 0.78 | 0.072 | 1.7E-02 |
| P05560 | Myosin-10                                                                  | 5 | 0.78 | 0.139 | 1.7E-02 |
| Q07238 | Hsp70H                                                                     | 4 | 0.78 | 0.129 | 2.4E-02 |
| Q43175 | D-3-phosphoglycerate dehydrogenase                                         | 3 | 0.77 | 0.421 | 3.2E-01 |
| P0C3L5 | Complement C4b                                                             | 3 | 0.77 | 0.167 | 7.9E-02 |
| Q94919 | Endonuclease domain-containing 1 protein                                   | 3 | 0.77 | 0.396 | 2.9E-01 |
| Q00610 | Clathrin heavy chain 1                                                     | 5 | 0.77 | 0.053 | 4.5E-04 |
| Q6D388 | Alastin-3                                                                  | 5 | 0.76 | 0.161 | 2.4E-02 |
| Q13884 | Beta-1-syntrophin                                                          | 1 | 0.76 | NA    | NA      |
| P40793 | Signal transducer and activator of transcription 3                         | 2 | 0.76 | NA    | NA      |
| Q92645 | Exocyst complex component 3                                                | 2 | 0.76 | NA    | NA      |
| Q79555 | Fliotilin-1                                                                | 2 | 0.76 | NA    | NA      |
| Q62956 | Engulfment and cell motility protein 1                                     | 1 | 0.76 | NA    | NA      |
| Q06956 | Neuroblast differentiation-associated protein AHNAAK                       | 5 | 0.76 | 0.126 | 9.5E-03 |
| P04217 | Alpha-1B-glycoprotein                                                      | 5 | 0.75 | 0.134 | 1.1E-02 |
| Q62373 | KN motif and ankyrin repeat domain-containing protein 2                    | 4 | 0.75 | 0.257 | 1.0E-01 |
| P11532 | Dystrophin                                                                 | 1 | 0.75 | NA    | NA      |
| P01042 | Kininogen-1                                                                | 3 | 0.75 | 0.227 | 1.2E-01 |
| Q72406 | Myosin-14                                                                  | 2 | 0.75 | NA    | NA      |
| Q11836 | Vesicle-associated membrane protein 3                                      | 1 | 0.75 | NA    | NA      |
| Q67234 | Protein TFG                                                                | 1 | 0.75 | NA    | NA      |
| Q01169 | Unconventional myosin Ic                                                   | 5 | 0.75 | 0.042 | 1.4E-04 |
| P00339 | Ras-related protein Rab-5A                                                 | 1 | 0.75 | NA    | NA      |
| Q9NV07 | Alpha-parvin                                                               | 2 | 0.75 | NA    | NA      |
| Q79523 | Dysferlin                                                                  | 1 | 0.74 | NA    | NA      |
| P47755 | F-actin-capping protein subunit alpha-2                                    | 1 | 0.74 | NA    | NA      |
| P51659 | Peroxisomal multifunctional enzyme type 2                                  | 1 | 0.74 | NA    | NA      |
| P17012 | cAMP-dependent protein kinase catalytic subunit alpha                      | 5 | 0.74 | 0.110 | 5.2E-03 |
| P23634 | Plasma membrane calcium-transporting ATPase 4                              | 5 | 0.74 | 0.132 | 9.6E-03 |
| Q9HBL0 | Tenon-1                                                                    | 5 | 0.74 | 0.184 | 2.9E-02 |
| Q01444 | Ankyrin-2                                                                  | 1 | 0.74 | NA    | NA      |
| P48735 | Isocitrate dehydrogenase [NADP], mitochondrial                             | 5 | 0.73 | 0.121 | 6.6E-03 |
| Q6S207 | Cancer-related nucleoside-triphosphatase                                   | 1 | 0.73 | NA    | NA      |
| Q6CZ07 | Tubulin-related neptis antigen-like                                        | 1 | 0.73 | NA    | NA      |
| Q14254 | Fliotilin-2                                                                | 4 | 0.73 | 0.164 | 3.0E-02 |
| Q15019 | Sepsin-2                                                                   | 4 | 0.73 | 0.038 | 7.4E-05 |
| Q90TV4 | Transmembrane protein 43                                                   | 4 | 0.73 | 0.170 | 3.3E-02 |
| P05362 | Intercellular adhesion molecule 1                                          | 5 | 0.72 | 0.238 | 5.2E-02 |
| Q05511 | Complement factor H-related protein 1                                      | 2 | 0.72 | NA    | NA      |
| Q94905 | Erlin-2                                                                    | 5 | 0.71 | 0.097 | 2.4E-03 |
| Q43301 | Heat shock 70 kDa protein 12A                                              | 4 | 0.71 | 0.114 | 1.0E-02 |
| Q43605 | Putative adenosinephosphorylase 2                                          | 2 | 0.71 | NA    | NA      |
| P06727 | Apolipoprotein A-IV                                                        | 5 | 0.71 | 0.081 | 1.1E-03 |
| P05556 | Integrin beta-1                                                            | 5 | 0.71 | 0.163 | 2.1E-02 |
| P01863 | Putative HLA class I histocompatibility antigen, alpha chain H             | 5 | 0.71 | NA    | NA      |
| Q6S838 | Extended synaptotagmin 1                                                   | 5 | 0.71 | 0.217 | 3.5E-02 |
| Q65197 | Retioulon-3                                                                | 1 | 0.70 | NA    | NA      |
| P01903 | HLA class II histocompatibility antigen, DR alpha chain                    | 5 | 0.70 | 0.318 | 9.7E-02 |
| Q13418 | Integrin-linked protein kinase                                             | 1 | 0.70 | NA    | NA      |
| P46939 | Ungaphin                                                                   | 4 | 0.70 | 0.288 | 9.6E-02 |
| Q9Y490 | Talin-1                                                                    | 5 | 0.70 | 0.076 | 7.9E-04 |
| P38405 | ADP-ribosylation factor-like protein 3                                     | 1 | 0.70 | NA    | NA      |
| Q02522 | Histone H1x                                                                | 3 | 0.70 | 0.338 | 1.7E-01 |
| P08133 | Annexin A6                                                                 | 5 | 0.70 | 0.129 | 5.6E-03 |
| P21964 | Catechol O-methyltransferase                                               | 1 | 0.69 | NA    | NA      |
| Q9NQZ2 | Polymerase I and transcript release factor                                 | 5 | 0.69 | 0.206 | 2.8E-02 |
| Q6782  | AP-2 complex subunit alpha-1                                               | 2 | 0.69 | NA    | NA      |
| P12914 | Alpha-actinin-1                                                            | 5 | 0.69 | 0.047 | 1.1E-04 |
| Q14764 | Major vault protein                                                        | 5 | 0.69 | 0.145 | 7.6E-03 |
| P32119 | Peroxi-redoxin-2                                                           | 5 | 0.68 | 0.037 | 4.1E-05 |
| P62073 | Anexin A7                                                                  | 5 | 0.68 | NA    | NA      |
| Q16181 | Sepsin-1                                                                   | 5 | 0.68 | 0.048 | 1.0E-04 |
| P10301 | Ras-related protein R-Ras                                                  | 1 | 0.68 | NA    | NA      |
| Q75869 | Filamin-B                                                                  | 5 | 0.68 | 0.108 | 2.3E-03 |
| P61764 | Syntaxin-binding protein 1                                                 | 3 | 0.67 | 0.247 | 9.2E-02 |
| P06993 | Sodium/potassium-transporting ATPase subunit alpha-2                       | 1 | 0.67 | NA    | NA      |
| P11413 | Glucose-6-phosphate 1-dehydrogenase                                        | 4 | 0.67 | 0.162 | 5.5E-02 |
| Q14192 | Four and a half LIM domains protein 2                                      | 1 | 0.67 | NA    | NA      |
| P05000 | Apolipoprotein D                                                           | 2 | 0.67 | NA    | NA      |
| P32004 | Neural cell adhesion molecule L1                                           | 1 | 0.66 | NA    | NA      |
| P60201 | Myelin proteolipid protein                                                 | 1 | 0.65 | NA    | NA      |
| P09294 | HLA class II histocompatibility antigen, DRB1-16 beta chain                | 1 | 0.64 | NA    | NA      |
| P42499 | Voltage-dependent calcium channel subunit alpha-2delta-1                   | 1 | 0.63 | NA    | NA      |
| P00388 | Serum amyloid A1 protein                                                   | 1 | 0.62 | NA    | NA      |
| P60053 | CD81 antigen                                                               | 1 | 0.62 | NA    | NA      |
| Q96905 | Protein kinase C delta-binding protein                                     | 3 | 0.62 | 0.239 | 6.8E-02 |
| Q5JR66 | Melanoma inhibitory activity protein 3                                     | 1 | 0.62 | NA    | NA      |
| P35566 | Filamin-2                                                                  | 1 | 0.61 | NA    | NA      |
| Q86V87 | Scavenger receptor cysteine-rich type 1 protein M130                       | 2 | 0.61 | NA    | NA      |
| Q07079 | Hsp70H-related protein                                                     | 1 | 0.61 | NA    | NA      |
| Q13527 | Calcium/calmodulin-dependent protein kinase type II subunit delta          | 1 | 0.61 | NA    | NA      |
| P06871 | Monocyte differentiation antigen CD14                                      | 3 | 0.60 | 0.534 | 2.3E-01 |
| Q03052 | Ligand-preferred partner                                                   | 2 | 0.60 | NA    | NA      |
| Q72700 | Target of Nesh-SH3                                                         | 1 | 0.60 | NA    | NA      |
| Q43760 | Synaptotagmin-2                                                            | 1 | 0.59 | NA    | NA      |
| Q9PCW1 | AP-2 complex subunit mu                                                    | 1 | 0.59 | NA    | NA      |
| P01911 | HLA class II histocompatibility antigen, DRB1-15 beta chain                | 1 | 0.57 | NA    | NA      |
| P01862 | HLA class I histocompatibility antigen, A-2 alpha chain                    | 1 | 0.57 | NA    | NA      |
| P63010 | AP-2 complex subunit beta                                                  | 2 | 0.57 | NA    | NA      |
| P50683 | Microfibril-associated glycoprotein 4                                      | 1 | 0.56 | NA    | NA      |
| Q60528 | Sodium/potassium-transporting ATPase subunit beta-1                        | 2 | 0.56 | NA    | NA      |
| P02689 | Tropomodulin-1                                                             | 1 | 0.55 | NA    | NA      |
| Q13425 | Beta-2-syntrophin                                                          | 3 | 0.55 | 0.357 | 9.9E-02 |
| Q96Z03 | EH domain-containing protein 3                                             | 1 | 0.55 | NA    | NA      |
| P06119 | Pituitary-derived growth factor receptor beta                              | 1 | 0.53 | NA    | NA      |
| P08311 | Cathepsin G                                                                | 1 | 0.50 | NA    | NA      |
| Q6B8F5 | Tubulin beta-6 chain                                                       | 2 | 0.50 | NA    | NA      |
| Q6UXB8 | Peptidase inhibitor 16                                                     | 2 | 0.49 | NA    | NA      |
| P23229 | Integrin alpha-6                                                           | 2 | 0.49 | NA    | NA      |
| P65787 | Keratin, type II cytoskeletal 8                                            | 1 | 0.48 | NA    | NA      |
| P17661 | Desmin                                                                     | 1 | 0.48 | NA    | NA      |
| P41222 | Prostaglandin-H2 D-isomerase                                               | 1 | 0.48 | NA    | NA      |
| Q10588 | ADP-ribosyl cytoskeletal ADP-ribose hydrolase 2                            | 1 | 0.48 | NA    | NA      |
| P68366 | Tubulin alpha-4A chain                                                     | 1 | 0.48 | NA    | NA      |
| P35611 | Alpha-adducin                                                              | 2 | 0.48 | NA    | NA      |
| Q14141 | Sepsin-6                                                                   | 1 | 0.47 | NA    | NA      |
| Q96HC4 | PDZ and LIM domain protein 5                                               | 1 | 0.46 | NA    | NA      |
| Q8IK56 | Protein kinase C and casein kinase substrate in neurons protein 3          | 1 | 0.46 | NA    | NA      |
| Q13642 | Four and a half LIM domains protein 1                                      | 1 | 0.46 | NA    | NA      |
| P09936 | Ubiquitin carboxyl-terminal hydrolase isozyme L1                           | 5 | 0.45 | 0.677 | 1.1E-01 |
| Q14787 | Larval-transforming growth factor beta-binding protein 2                   | 2 | 0.45 | NA    | NA      |
| Q13509 | Tubulin beta-3 chain                                                       | 2 | 0.45 | NA    | NA      |
| Q98431 | Lacstatherin                                                               | 2 | 0.44 | NA    | NA      |
| Q15041 | ADP-ribosylation factor-like protein 6-interacting protein 1               | 1 | 0.44 | NA    | NA      |
| P16452 | Erythrocyte membrane protein band 4.2                                      | 1 | 0.44 | NA    | NA      |
| Q16270 | Insulin-like growth factor-binding protein 7                               | 1 | 0.44 | NA    | NA      |
| Q6PC12 | BTBD10C domain-containing protein KCTD12                                   | 1 | 0.44 | NA    | NA      |
| Q62777 | Syntaxin-2                                                                 | 2 | 0.40 | NA    | NA      |
| Q07696 | Thrombospondin-1                                                           | 1 | 0.40 | NA    | NA      |
| Q9NY15 | Stabilin-1                                                                 | 2 | 0.40 | NA    | NA      |
| P15144 | Aminopeptidase N                                                           | 1 | 0.40 | NA    | NA      |
| Q6N246 | Chondrothrin-like protein                                                  | 1 | 0.19 | NA    | NA      |
| Q63HR2 | Tensin-like C1 domain-containing phosphatase                               | 2 | 0.19 | NA    | NA      |
| Q6JDX5 | Fibulin-5                                                                  | 1 | 0.19 | NA    | NA      |
| P02462 | Collagen alpha-1(VI) chain                                                 | 2 | 0.19 | NA    | NA      |
| P62736 | Actin, aortic smooth muscle                                                | 2 | 0.18 | NA    | NA      |
| P12277 | Creatine kinase B-type                                                     | 1 | 0.17 | NA    | NA      |
| P69768 | Guanine nucleotide-binding protein G(I)/G(S)/G(O) subunit gamma-2          | 1 | 0.17 | NA    | NA      |
| P03973 | Antileukoprotease                                                          | 1 | 0.16 | NA    | NA      |
| Q16518 | Retinoid isomerase                                                         | 1 | 0.14 | NA    | NA      |
| P33211 | Guanine nucleotide-binding protein G(T) subunit gamma-T1                   | 1 | 0.12 | NA    | NA      |
| P35243 | Recoverin                                                                  | 1 | 0.11 | NA    | NA      |
| Q13885 | Tubulin beta-2A chain                                                      | 1 | 0.11 | NA    | NA      |
| P02452 | Collagen alpha-1(I) chain                                                  | 2 | 0.10 | NA    | NA      |
| P07196 | Neurofilament light polypeptide                                            | 2 | 0.09 | NA    | NA      |
| Q16853 | Membrane primary amine oxidase                                             | 1 | 0.07 | NA    | NA      |
| P07327 | Complement component C8 alpha chain                                        | 1 | 0.05 | NA    | NA      |
| P01024 | Complement C3                                                              | 5 | 0.47 | 0.187 | 1.5E-02 |
| P67566 | Integrin alpha-V                                                           | 4 | 0.46 | 0.111 | 1.6E-03 |
| P29992 | Guanine nucleotide-binding protein subunit alpha-11                        | 3 | 0.46 | 0.153 | 3.7E-02 |
| Q6N244 | EH domain-containing protein 2                                             | 4 | 0.44 | 0.122 | 6.7E-03 |
| P04959 | Guanine nucleotide-binding protein G(I) subunit alpha-2                    | 4 | 0.44 | 0.133 | 6.8E-03 |
| P07099 | Epoxide hydrolase 1                                                        | 5 | 0.44 | 0.181 | 1.0E-02 |
| P16206 | Vinculin                                                                   | 5 | 0.43 | 0.062 | 4.8E-04 |
| Q15582 | Transforming growth factor-beta-induced protein (g-h3)                     | 4 | 0.42 | 0.106 | 3.7E-03 |
| P35579 | Myosin-9                                                                   | 5 | 0.41 | 0.091 | 6.3E-04 |
| Q15813 | Spectrin alpha chain, non-erythrocytic 1                                   | 5 | 0.41 | 0.148 | 3.6E-03 |
| P06960 | Myosin light polypeptide 6                                                 | 5 | 0.40 | 0.072 | 2.5E-04 |
| Q01082 | Spectrin beta chain, non-erythrocytic 1                                    | 5 | 0.40 | 0.185 | 7.4E-03 |
| Q14824 | Inter-alpha-typsin inhibitor heavy chain H4                                | 3 | 0.39 | 0.197 | 1.5E-02 |
| Q07954 | Prolow-density lipoprotein receptor-related protein 1                      | 5 | 0.38 | 0.202 | 7.3E-03 |
| Q16363 | Laminin subunit alpha-4                                                    | 5 | 0.35 | 0.136 | 1.5E-03 |
| Q94216 | Thy-1 membrane glycoprotein                                                | 3 | 0.34 | 0.060 | 1.5E-03 |
| P00747 | Plasminogen                                                                | 5 | 0.34 | 0.211 | 6.8E-03 |
| Q03135 | Caveolin-1                                                                 | 3 | 0.34 | 0.233 | 4.3E-02 |
| Q02962 | A-kinase anchor protein 12                                                 | 3 | 0.34 | 0.176 | 1.4E-03 |
| P22105 | Tenascin-X                                                                 | 3 | 0.33 | 0.050 | 2.1E-03 |
| Q64910 | ATP-binding cassette sub-family A member 6                                 | 4 | 0.33 | 0.139 | 4.0E-03 |
| Q88540 | Larixin                                                                    | 3 | 0.33 | 0.076 | 1.2E-04 |
| P61626 | Lyszyme C                                                                  | 4 | 0.32 | 0.252 | 2.0E-02 |
| P07355 | Atropinase A2                                                              | 5 | 0.32 | 0.204 | 4.6E-03 |
| Q9NZM1 | Myofelin                                                                   | 5 | 0.32 | 0.029 | 2.5E-06 |
| P04196 | Histidine-rich glycoprotein                                                | 4 | 0.31 | 0.172 | 6.7E-03 |
| P21333 | Filamin-A                                                                  | 5 | 0.31 | 0.178 | 3.7E-03 |
| P00167 | Cytochrome b5                                                              | 5 | 0.31 | 0.122 | 6.4E-04 |
| P07942 | Laminin subunit beta-1                                                     | 4 | 0.30 | 0.090 | 9.4E-04 |
| P09493 | Tropomyosin alpha-1 chain                                                  | 5 | 0.30 | 0.114 | 3.6E-04 |
| P07358 | Complement component C8 beta chain                                         | 3 | 0.30 | 0.270 | 4.7E-02 |
| Q16555 | Dihydropyrimidinase-related protein 2                                      | 5 | 0.30 | 0.104 | 3.1E-04 |
| P04450 | Cenpalasmin                                                                | 3 | 0.30 | 0.171 | 1.1E-03 |
| P12111 | Collagen alpha-3(VI) chain                                                 | 5 | 0.29 | 0.163 | 1.6E-03 |

Table S17 Average Non-Metastatic Tumors

|        |                                                                      |   |      |       |         |
|--------|----------------------------------------------------------------------|---|------|-------|---------|
| P12109 | Collagen alpha-1(VI) chain                                           | 5 | 0.29 | 0.156 | 1.3E-03 |
| P22413 | Ectonucleotide pyrophosphatase/phosphodiesterase family member 1     | 4 | 0.29 | 0.144 | 3.2E-03 |
| P46157 | Aplysin-1                                                            | 4 | 0.28 | 0.130 | 2.3E-03 |
| O00468 | Aggrin                                                               | 4 | 0.28 | 0.230 | 1.2E-02 |
| P02079 | Fibrinogen gamma chain                                               | 5 | 0.28 | 0.127 | 5.6E-04 |
| P13671 | Complement component C6                                              | 3 | 0.27 | 0.082 | 4.0E-03 |
| P02675 | Fibrinogen beta chain                                                | 5 | 0.27 | 0.095 | 1.6E-04 |
| P02686 | Laminin subunit beta-2                                               | 5 | 0.27 | 0.127 | 4.9E-04 |
| P02751 | Fibronectin                                                          | 5 | 0.26 | 0.174 | 1.5E-03 |
| P02549 | Spectrin alpha chain, erythrocytic 1                                 | 5 | 0.26 | 0.079 | 6.9E-05 |
| Q15220 | Laminin subunit alpha-5                                              | 5 | 0.26 | 0.166 | 1.3E-03 |
| P01011 | Alpha-1-antichymotrypsin                                             | 5 | 0.25 | 0.203 | 2.4E-03 |
| Q91622 | EMLN-1                                                               | 5 | 0.25 | 0.289 | 8.8E-04 |
| P02549 | ApoE protein E                                                       | 5 | 0.25 | 0.095 | 1.3E-04 |
| P36269 | Gamma-glutamyltransferase 5                                          | 5 | 0.25 | 0.213 | 2.7E-03 |
| P12110 | Collagen alpha-2(VI) chain                                           | 5 | 0.24 | 0.198 | 2.0E-03 |
| P08204 | Extracellular superoxide dismutase [Cu-Zn]                           | 5 | 0.24 | 0.204 | 2.3E-03 |
| P02749 | Beta-2-glycoprotein 1                                                | 4 | 0.24 | 0.125 | 1.5E-03 |
| P05855 | Basal cell adhesion molecule                                         | 5 | 0.24 | 0.109 | 1.4E-04 |
| P48821 | Microtubule-associated protein 1B                                    | 5 | 0.23 | 0.184 | 1.4E-03 |
| P11166 | Solute carrier family 2, facilitated glucose transporter member 1    | 5 | 0.23 | 0.181 | 1.3E-03 |
| P27105 | Erythrocyte band 7 integral membrane protein                         | 5 | 0.23 | 0.096 | 1.2E-04 |
| P01197 | Neurofilament medium polypeptide                                     | 4 | 0.23 | 0.206 | 5.8E-03 |
| P07360 | Complement component C6 gamma chain                                  | 3 | 0.23 | 0.177 | 1.4E-02 |
| P05164 | Mycoperoxidase                                                       | 3 | 0.23 | 0.105 | 4.9E-03 |
| P68160 | Basement membrane-specific heparan sulfate proteoglycan core protein | 5 | 0.23 | 0.099 | 1.2E-04 |
| P02071 | Fibrinogen alpha chain                                               | 5 | 0.21 | 0.077 | 3.5E-05 |
| P11277 | Spectrin beta chain, erythrocytic                                    | 5 | 0.21 | 0.060 | 4.1E-05 |
| Q14112 | Nidogen-2                                                            | 5 | 0.21 | 0.091 | 6.4E-05 |
| P02654 | ApoE protein C-I                                                     | 4 | 0.21 | 0.178 | 5.0E-03 |
| Q14699 | Rafin                                                                | 4 | 0.20 | 0.113 | 7.8E-04 |
| P06903 | Protein S100-A10                                                     | 5 | 0.20 | 0.133 | 2.8E-04 |
| Q43491 | Band 4.1-like protein 2                                              | 5 | 0.20 | 0.218 | 1.8E-03 |
| P11047 | Laminin subunit gamma-1                                              | 5 | 0.20 | 0.161 | 5.8E-04 |
| Q01995 | Transgelin                                                           | 5 | 0.20 | 0.130 | 2.4E-04 |
| Q68X41 | Asprin                                                               | 4 | 0.20 | 0.039 | 3.1E-05 |
| P08572 | Collagen alpha-2(IV) chain                                           | 5 | 0.19 | 0.123 | 1.8E-04 |
| P01008 | Antithrombin-III                                                     | 5 | 0.19 | 0.133 | 2.4E-04 |
| P01871 | Ig mu chain C-region                                                 | 5 | 0.19 | 0.285 | 4.4E-03 |
| O84875 | Sortin and SH3 domain-containing protein 2                           | 5 | 0.19 | 0.207 | 1.3E-03 |
| P84683 | Annexin A1                                                           | 5 | 0.19 | 0.309 | 5.7E-03 |
| P68166 | Inhibin beta E chain                                                 | 4 | 0.19 | 0.154 | 1.7E-03 |
| P02886 | Myosin basic protein                                                 | 5 | 0.19 | 0.136 | 2.5E-04 |
| P80723 | Brain acid soluble protein 1                                         | 5 | 0.18 | 0.264 | 3.0E-03 |
| P39060 | Collagen alpha-1(XVIII) chain                                        | 5 | 0.18 | 0.096 | 5.8E-05 |
| Q12805 | EGF-containing fibulin-like extracellular matrix protein 1           | 4 | 0.18 | 0.081 | 2.2E-04 |
| P02946 | Chymase                                                              | 5 | 0.18 | 0.247 | 2.2E-03 |
| P02760 | Protein AMBP                                                         | 4 | 0.17 | 0.242 | 5.5E-03 |
| P10745 | Retinol-binding protein 3                                            | 4 | 0.17 | 0.070 | 1.4E-04 |
| Q29109 | Collagen alpha-1(XVII) chain                                         | 3 | 0.17 | 0.290 | 2.4E-02 |
| P05186 | Alkaline phosphatase, tissue-nonspecific isozyme                     | 5 | 0.17 | 0.094 | 4.7E-05 |
| P02714 | Mincian                                                              | 5 | 0.17 | 0.131 | 1.7E-04 |
| P06447 | Protein S100-A4                                                      | 5 | 0.17 | 0.224 | 1.3E-03 |
| Q14495 | Lipid phosphate phosphohydrolase 3                                   | 3 | 0.17 | 0.319 | 3.0E-02 |
| P39059 | Collagen alpha-1(XV) chain                                           | 5 | 0.17 | 0.207 | 6.7E-04 |
| P43320 | Beta-crystallin B2                                                   | 5 | 0.16 | 0.198 | 8.1E-04 |
| P21928 | CD9 antigen                                                          | 5 | 0.16 | 0.241 | 1.6E-03 |
| P87449 | Myosin-11                                                            | 5 | 0.16 | 0.071 | 1.3E-05 |
| P14543 | Nidogen-1                                                            | 5 | 0.16 | 0.104 | 6.0E-05 |
| P21810 | Bilgican                                                             | 5 | 0.15 | 0.239 | 1.5E-03 |
| Q05707 | Collagen alpha-1(XIV) chain                                          | 5 | 0.15 | 0.160 | 5.9E-04 |
| Q15661 | Tryptase alpha/beta-1                                                | 5 | 0.15 | 0.157 | 2.7E-04 |
| P86932 | Actin, alpha cardiac muscle 1                                        | 3 | 0.15 | 0.168 | 9.4E-03 |
| P10643 | Complement component C7                                              | 3 | 0.15 | 0.270 | 1.9E-02 |
| Q14195 | Dihydropyrimidinase-related protein 3                                | 5 | 0.15 | 0.213 | 8.4E-04 |
| P04275 | von Willebrand factor                                                | 5 | 0.15 | 0.152 | 2.3E-04 |
| P02730 | Band 3 anion transport protein                                       | 5 | 0.14 | 0.134 | 1.3E-04 |
| Q66X40 | Pertaxin                                                             | 5 | 0.14 | 0.248 | 1.4E-03 |
| P01031 | Complement C5                                                        | 5 | 0.14 | 0.181 | 3.9E-04 |
| P41219 | Peripherin                                                           | 5 | 0.14 | 0.217 | 7.8E-04 |
| P51888 | Prothelin                                                            | 5 | 0.13 | 0.180 | 3.4E-04 |
| P02748 | Complement component C9                                              | 5 | 0.13 | 0.206 | 6.3E-04 |
| P24844 | Myosin regulatory light polypeptide 9                                | 5 | 0.13 | 0.094 | 2.5E-05 |
| P07585 | Decorin                                                              | 5 | 0.12 | 0.184 | 3.4E-04 |
| P10909 | Clustrin                                                             | 5 | 0.12 | 0.191 | 3.7E-04 |
| P15088 | Mast cell carboxypeptidase A                                         | 4 | 0.12 | 0.096 | 1.9E-04 |
| P15555 | Fibillin-1                                                           | 5 | 0.12 | 0.228 | 6.9E-04 |
| P35625 | Metalloproteinase inhibitor 3                                        | 5 | 0.11 | 0.140 | 1.0E-04 |
| P04004 | Vitronectin                                                          | 5 | 0.11 | 0.181 | 2.8E-04 |
| P22748 | Carbonic anhydrase 4                                                 | 5 | 0.11 | 0.222 | 5.8E-04 |
| P21980 | Protein-glutamine gamma-glutamyltransferase 2                        | 5 | 0.10 | 0.207 | 4.0E-04 |
| P51884 | Lumican                                                              | 5 | 0.10 | 0.201 | 3.4E-04 |
| P22952 | Glutathione peroxidase 3                                             | 5 | 0.10 | 0.271 | 1.6E-03 |
| P02743 | Serum amyloid P-component                                            | 5 | 0.09 | 0.292 | 1.3E-03 |
| P25189 | Myelin protein P0                                                    | 5 | 0.09 | 0.238 | 5.2E-04 |
| P01323 | Collagen alpha-2(I) chain                                            | 5 | 0.08 | 0.305 | 6.2E-04 |

Average LC-MS/MS (TRAQ) results from non-metastasized tumor specimens UM 13, 20, 23, 25, 26. Brown denotes change  $\geq 2$  standard deviations (SD) from the mean, yellow denotes change  $\geq 1$  SD and green highlights p values  $\leq 0.05$ . NA, not applicable, n=3 samples.
