# Supplementary material for: iTRAQ Quantitative Proteomic Comparison of Metastatic and Non-Metastatic Uveal Melanoma Tumors
Source: PubMed Central journal article supplement (PMC4549237; doi:10.1371/journal.pone.0135543), 2015-08-25
Supplement: pone.0135543.s018.pdf [file pone.0135543.s018.pdf]

Supplementary Table S18  
**Overall Summary of Quantitative Proteomic Results**

| Sample                                              | <sup>a</sup> Proteins Quantified | <sup>b</sup> Significantly Elevated Proteins | <sup>c</sup> Significantly Decreased Proteins | Supplementary Table Number |
|-----------------------------------------------------|----------------------------------|----------------------------------------------|-----------------------------------------------|----------------------------|
| <b><i>Metastatic Tumors in Training Set</i></b>     |                                  |                                              |                                               |                            |
| UM19                                                | 899                              | 81                                           | 85                                            | S1                         |
| UM21                                                | 835                              | 49                                           | 61                                            | S2                         |
| UM24                                                | 724                              | 65                                           | 66                                            | S3                         |
| UM28                                                | 949                              | 70                                           | 87                                            | S4                         |
| UM30                                                | 912                              | 72                                           | 100                                           | S5                         |
| <sup>d</sup> Average (n = 5)                        | 1405                             | 85                                           | 125                                           | S16                        |
| <b><i>Non-Metastatic Tumors in Training Set</i></b> |                                  |                                              |                                               |                            |
| UM13                                                | 884                              | 66                                           | 79                                            | S6                         |
| UM20                                                | 803                              | 53                                           | 85                                            | S7                         |
| UM23                                                | 910                              | 71                                           | 92                                            | S8                         |
| UM25                                                | 869                              | 77                                           | 92                                            | S9                         |
| UM26                                                | 798                              | 69                                           | 84                                            | S10                        |
| <sup>e</sup> Average (n = 5)                        | 1389                             | 79                                           | 120                                           | S17                        |
| <b><i>Independent Tumor Sample Set</i></b>          |                                  |                                              |                                               |                            |
| UM02 No Metastasis                                  | 239                              | 24                                           | 30                                            | S11                        |
| UM09 Metastasis                                     | 250                              | 30                                           | 31                                            | S12                        |
| UM11 Metastasis                                     | 193                              | 19                                           | 23                                            | S13                        |
| UM12 Metastasis                                     | 193                              | 21                                           | 19                                            | S14                        |
| UM15 No Metastasis                                  | 966                              | 74                                           | 96                                            | S15                        |

a. Total number of proteins quantified with  $\geq 2$  peptides/protein. b. Number of proteins with ratios  $\geq 1$  standard deviation above the mean and  $p$  values  $\leq 0.05$  (t-test). c. Number of proteins with ratios  $\geq 1$  standard deviation below the mean and  $p$  values  $\leq 0.05$ . d. From samples UM 19, 21, 24, 28, 30. e. From samples UM 13, 20, 23, 25, 26.
