# Supplementary material for: iTRAQ Quantitative Proteomic Comparison of Metastatic and Non-Metastatic Uveal Melanoma Tumors
Source: PubMed Central journal article supplement (PMC4549237; doi:10.1371/journal.pone.0135543), 2015-08-25
Supplement: pone.0135543.s019.pdf [file pone.0135543.s019.pdf]

Supplementary Table S19  
**Relative Abundance: Proteins Detected Only in Metastatic UM Tumors**

| Uni-Prot Accession | Protein                                                                       | Sample Frequency<br>n = 5 total | Ratio<br>UM/Control | SEM   | p value |
|--------------------|-------------------------------------------------------------------------------|---------------------------------|---------------------|-------|---------|
| P62191             | 26S protease regulatory subunit 4                                             | 2                               | 1.340               | NA    | NA      |
| Q99460             | 26S proteasome non-ATPase regulatory subunit 1                                | 2                               | 0.869               | NA    | NA      |
| O00232             | 26S proteasome non-ATPase regulatory subunit 12                               | 1                               | 0.945               | NA    | NA      |
| Q9UNM6             | 26S proteasome non-ATPase regulatory subunit 13                               | 2                               | 1.069               | NA    | NA      |
| O00487             | 26S proteasome non-ATPase regulatory subunit 14                               | 1                               | 1.084               | NA    | NA      |
| Q16401             | 26S proteasome non-ATPase regulatory subunit 5                                | 1                               | 1.062               | NA    | NA      |
| Q9Y3D9             | 28S ribosomal protein S23, mitochondrial                                      | 1                               | 1.319               | NA    | NA      |
| P63220             | 40S ribosomal protein S21                                                     | 1                               | 1.462               | NA    | NA      |
| Q71UM5             | 40S ribosomal protein S27-like                                                | 2                               | 1.479               | NA    | NA      |
| P52209             | 6-phosphogluconate dehydrogenase, decarboxylating                             | 1                               | 2.093               | NA    | NA      |
| P84098             | 60S ribosomal protein L19                                                     | 1                               | 1.023               | NA    | NA      |
| P62910             | 60S ribosomal protein L32                                                     | 1                               | 1.174               | NA    | NA      |
| Q9BPX5             | Actin-related protein 2/3 complex subunit 5-like protein                      | 1                               | 0.967               | NA    | NA      |
| P62330             | ADP-ribosylation factor 6                                                     | 1                               | 1.306               | NA    | NA      |
| P43652             | Aflamin                                                                       | 1                               | 4.012               | NA    | NA      |
| Q8NUM9             | All-trans-retinol 13,14-reductase                                             | 1                               | 0.702               | NA    | NA      |
| P02763             | Alpha-1-acid glycoprotein 1                                                   | 3                               | 1.988               | 0.480 | 0.289   |
| P08697             | Alpha-2-antiplasmin                                                           | 1                               | 1.473               | NA    | NA      |
| Q16352             | Alpha-interferon                                                              | 1                               | 0.836               | NA    | NA      |
| Q9P2R3             | Ankyrin repeat and FYVE domain-containing protein 1                           | 2                               | 0.832               | NA    | NA      |
| P12429             | Annexin A3                                                                    | 1                               | 2.252               | NA    | NA      |
| Q03518             | Antigen peptide transporter 1                                                 | 1                               | 3.164               | NA    | NA      |
| P04114             | Apolipoprotein B-100                                                          | 3                               | 0.648               | 0.534 | 0.502   |
| P02656             | Apolipoprotein C-II                                                           | 1                               | 0.191               | NA    | NA      |
| Q9BQE5             | Apolipoprotein L2                                                             | 1                               | 7.896               | NA    | NA      |
| O43776             | Asparagine--tRNA ligase, cytoplasmic                                          | 2                               | 2.170               | NA    | NA      |
| Q15121             | Astrocytic phosphoprotein PEA-15                                              | 2                               | 1.003               | NA    | NA      |
| P28288             | ATP-binding cassette sub-family D member 3                                    | 1                               | 0.572               | NA    | NA      |
| Q01813             | ATP-dependent 6-phosphofructokinase, platelet type                            | 2                               | 0.652               | NA    | NA      |
| Q9GZR7             | ATP-dependent RNA helicase DDX24                                              | 1                               | 0.754               | NA    | NA      |
| P17213             | Bactericidal permeability-increasing protein                                  | 1                               | 3.625               | NA    | NA      |
| P08236             | Beta-glucuronidase                                                            | 2                               | 2.459               | NA    | NA      |
| Q3LX43             | Bifunctional ATP-dependent dihydroxyacetone kinase/FAD-AMP lyase (cycling)    | 1                               | 2.466               | NA    | NA      |
| P07814             | Bifunctional glutamate/proline--tRNA ligase                                   | 2                               | 1.553               | NA    | NA      |
| O60271             | C-Jun-amino-terminal kinase-interacting protein 4                             | 1                               | 0.751               | NA    | NA      |
| P30622             | CAP-Gly domain-containing linker protein 1                                    | 1                               | 0.830               | NA    | NA      |
| Q8NEV1             | Casein kinase II subunit alpha 3                                              | 1                               | 0.468               | NA    | NA      |
| P11717             | Cation-independent mannose-6-phosphate receptor                               | 1                               | 1.205               | NA    | NA      |
| P14209             | CD99 antigen                                                                  | 1                               | 0.633               | NA    | NA      |
| Q02224             | Centromere-associated protein E                                               | 1                               | 0.182               | NA    | NA      |
| Q9B122             | Chitotriosylidiphosphotriohol beta-mannosyltransferase                        | 1                               | 0.406               | NA    | NA      |
| Q8IWA5             | Choline transporter-like protein 2                                            | 1                               | 0.351               | NA    | NA      |
| P45973             | Chromobox protein homolog 5                                                   | 1                               | 1.979               | NA    | NA      |
| P00740             | Coagulation factor IX                                                         | 1                               | 0.703               | NA    | NA      |
| P00488             | Coagulation factor XIII A chain                                               | 1                               | 0.811               | NA    | NA      |
| P48444             | Coatomer subunit delta                                                        | 2                               | 0.908               | NA    | NA      |
| Q14011             | Cold-inducible RNA-binding protein                                            | 1                               | 0.787               | NA    | NA      |
| P02461             | Collagen alpha-1(III) chain                                                   | 1                               | 0.839               | NA    | NA      |
| P02746             | Complement C1q subcomponent subunit B                                         | 2                               | 1.420               | NA    | NA      |
| Q92905             | COPII signalosome complex subunit 5                                           | 2                               | 0.606               | NA    | NA      |
| P17540             | Creatine kinase S-type, mitochondrial                                         | 2                               | 1.542               | NA    | NA      |
| Q13617             | Cullin-2                                                                      | 1                               | 1.367               | NA    | NA      |
| P01034             | Cystatin-C                                                                    | 1                               | 1.591               | NA    | NA      |
| P52943             | Cysteine-rich protein 2                                                       | 1                               | 0.997               | NA    | NA      |
| P04839             | Cytochrome b-245 heavy chain                                                  | 1                               | 0.888               | NA    | NA      |
| Q43169             | Cytochrome b5 type B                                                          | 1                               | 1.185               | NA    | NA      |
| P14406             | Cytochrome c oxidase subunit 7A2, mitochondrial                               | 1                               | 1.374               | NA    | NA      |
| P21359             | Cytoplasmic aconitase hydratase                                               | 1                               | 2.031               | NA    | NA      |
| Q6IAN0             | Dehydrogenase/reductase SDR family member 7B                                  | 1                               | 2.196               | NA    | NA      |
| O00115             | Deoxyribonuclease-2-alpha                                                     | 1                               | 2.790               | NA    | NA      |
| Q8WVC6             | Dephospho-CoA kinase domain-containing protein                                | 2                               | 1.015               | NA    | NA      |
| Q9NY33             | Dipeptidyl peptidase 3                                                        | 1                               | 2.343               | NA    | NA      |
| Q02880             | DNA topoisomerase 2-beta                                                      | 1                               | 0.549               | NA    | NA      |
| Q8UBS4             | DnaJ homolog subfamily B member 11                                            | 3                               | 0.877               | 0.097 | 0.308   |
| Q8NVH1             | DnaJ homolog subfamily C member 11                                            | 1                               | 1.862               | NA    | NA      |
| Q9HS24             | DnaJ homolog subfamily C member 5                                             | 1                               | 0.811               | NA    | NA      |
| Q05193             | Dynamin-1                                                                     | 1                               | 0.776               | NA    | NA      |
| Q9NP97             | Dynein light chain roadblock-type 1                                           | 1                               | 0.704               | NA    | NA      |
| Q14118             | Dystroglycan                                                                  | 1                               | 0.375               | NA    | NA      |
| Q63HN8             | E3 ubiquitin-protein ligase RNF213                                            | 1                               | 2.346               | NA    | NA      |
| O94874             | E3 UFM1-protein ligase 1                                                      | 2                               | 1.223               | NA    | NA      |
| Q9UI08             | Ena/VASP-like protein                                                         | 1                               | 5.929               | NA    | NA      |
| P42566             | Epidermal growth factor receptor substrate 15                                 | 1                               | 0.662               | NA    | NA      |
| O75477             | Erin-1                                                                        | 1                               | 0.653               | NA    | NA      |
| P47813             | Eukaryotic translation initiation factor 1A, X-chromosomal                    | 1                               | 0.871               | NA    | NA      |
| P41091             | Eukaryotic translation initiation factor 2 subunit 3                          | 1                               | 1.310               | NA    | NA      |
| O75822             | Eukaryotic translation initiation factor 3 subunit J                          | 1                               | 1.658               | NA    | NA      |
| P23588             | Eukaryotic translation initiation factor 4B                                   | 1                               | 2.485               | NA    | NA      |
| Q9NV70             | Exocyst complex component 1                                                   | 1                               | 0.802               | NA    | NA      |
| Q16610             | Extracellular matrix protein 1                                                | 2                               | 1.442               | NA    | NA      |
| P51648             | Fatty aldehyde dehydrogenase                                                  | 1                               | 0.767               | NA    | NA      |
| P02792             | Ferritin light chain                                                          | 1                               | 2.429               | NA    | NA      |
| P23142             | Fibrin-1                                                                      | 1                               | 0.399               | NA    | NA      |
| Q5T1M5             | FK506-binding protein 15                                                      | 1                               | 1.438               | NA    | NA      |
| P14207             | Folate receptor beta                                                          | 1                               | 0.294               | NA    | NA      |
| Q06787             | Fragile X mental retardation protein 1                                        | 3                               | 1.599               | 0.164 | 0.104   |
| Q9UEY8             | Gamma-adducin                                                                 | 1                               | 0.414               | NA    | NA      |
| Q95479             | GDH6PGL endoplasmic bifunctional protein                                      | 1                               | 0.941               | NA    | NA      |
| P07093             | Glia-derived nexin                                                            | 3                               | 2.304               | 0.211 | 0.059   |
| P14136             | Glia fibrillary acidic protein                                                | 2                               | 0.184               | NA    | NA      |
| O76003             | Glutaredoxin-3                                                                | 1                               | 1.093               | NA    | NA      |
| P48637             | Glutathione synthetase                                                        | 1                               | 2.213               | NA    | NA      |
| Q08379             | Golgin subfamily A member 2                                                   | 1                               | 1.347               | NA    | NA      |
| Q08378             | Golgin subfamily A member 3                                                   | 1                               | 1.008               | NA    | NA      |
| Q96S52             | GPI transamidase component PIG-S                                              | 1                               | 0.639               | NA    | NA      |
| P49863             | Granzyme K                                                                    | 1                               | 4.362               | NA    | NA      |
| P50151             | Guanine nucleotide-binding protein G(I)/G(S)/G(O) subunit gamma-10            | 1                               | 0.799               | NA    | NA      |
| A8MTJ3             | Guanine nucleotide-binding protein G(t) subunit alpha-3                       | 1                               | 0.259               | NA    | NA      |
| Q8NX24             | H/ACA ribonucleoprotein complex subunit 2                                     | 2                               | 1.146               | NA    | NA      |
| P14317             | Hematopoietic lineage cell-specific protein                                   | 2                               | 1.450               | NA    | NA      |
| P09601             | Heme oxygenase 1                                                              | 1                               | 3.785               | NA    | NA      |
| Q9NRV9             | Heme-binding protein 1                                                        | 2                               | 3.617               | NA    | NA      |
| Q9Y3E1             | Hepatoma-derived growth factor-related protein 3                              | 1                               | 1.071               | NA    | NA      |
| P55795             | Heterogeneous nuclear ribonucleoprotein H2                                    | 1                               | 1.028               | NA    | NA      |
| P30273             | High affinity immunoglobulin epsilon receptor subunit gamma                   | 1                               | 4.176               | NA    | NA      |
| P26583             | High mobility group protein B2                                                | 5                               | 0.552               | 0.170 | 0.025   |
| O15347             | High mobility group protein B3                                                | 1                               | 2.896               | NA    | NA      |
| Q13547             | Histone deacetylase 1                                                         | 1                               | 1.623               | NA    | NA      |
| P16403             | Histone H1.2                                                                  | 2                               | 0.948               | NA    | NA      |
| P05534             | HLA class I histocompatibility antigen, A-24 alpha chain                      | 1                               | 3.170               | NA    | NA      |
| P04439             | HLA class I histocompatibility antigen, A-3 alpha chain                       | 1                               | 3.182               | NA    | NA      |
| P16188             | HLA class I histocompatibility antigen, A-30 alpha chain                      | 1                               | 2.218               | NA    | NA      |
| P30464             | HLA class I histocompatibility antigen, B-15 alpha chain                      | 1                               | 1.571               | NA    | NA      |
| P18463             | HLA class I histocompatibility antigen, B-37 alpha chain                      | 1                               | 4.777               | NA    | NA      |
| P30484             | HLA class I histocompatibility antigen, B-46 alpha chain                      | 1                               | 1.542               | NA    | NA      |
| Q07000             | HLA class I histocompatibility antigen, Cw-15 alpha chain                     | 1                               | 1.227               | NA    | NA      |
| P30504             | HLA class I histocompatibility antigen, Cw-4 alpha chain                      | 1                               | 1.825               | NA    | NA      |
| P10321             | HLA class I histocompatibility antigen, Cw-7 alpha chain                      | 2                               | 0.705               | NA    | NA      |
| P13760             | HLA class II histocompatibility antigen, DRB1-4 beta chain                    | 1                               | 1.925               | NA    | NA      |
| P01600             | Ig kappa chain V-I region Hau                                                 | 1                               | 0.316               | NA    | NA      |
| Q8TEX9             | Importin-4                                                                    | 1                               | 0.711               | NA    | NA      |
| P11215             | Integrin alpha-M                                                              | 1                               | 2.098               | NA    | NA      |
| P19827             | Inter-alpha-trypsin inhibitor heavy chain H1                                  | 1                               | 1.396               | NA    | NA      |
| P19823             | Inter-alpha-trypsin inhibitor heavy chain H2                                  | 2                               | 1.248               | NA    | NA      |
| P32455             | Interferon-induced guanylate-binding protein 1                                | 1                               | 4.785               | NA    | NA      |
| O75569             | Interferon-inducible double-stranded RNA-dependent protein kinase activator A | 1                               | 1.197               | NA    | NA      |
| O43837             | Isoacetyl dehydrogenase [NAD] subunit beta, mitochondrial                     | 2                               | 1.007               | NA    | NA      |
| P26440             | Isovaleryl-CoA dehydrogenase, mitochondrial                                   | 1                               | 1.702               | NA    | NA      |
| P02788             | Lactotransferrin                                                              | 1                               | 1.119               | NA    | NA      |
| Q95538             | Legumain                                                                      | 1                               | 1.795               | NA    | NA      |

Table S19-Proteins Only in Metastatic Tumors

|        |                                                                     |   |       |       |       |
|--------|---------------------------------------------------------------------|---|-------|-------|-------|
| Q9Y608 | Leucine-rich repeat flightless-interacting protein 2                | 1 | 1.252 | NA    | NA    |
| P09960 | Leukotriene A-4 hydrolase                                           | 1 | 2.834 | NA    | NA    |
| P36776 | Lon protease homolog, mitochondrial                                 | 1 | 1.276 | NA    | NA    |
| Q15046 | Lysine-tRNA ligase                                                  | 3 | 1.357 | 0.239 | 0.330 |
| O75352 | Mannose-6-phosphate utilization defect 1 protein                    | 1 | 1.230 | NA    | NA    |
| P10721 | Mast/serum cell growth factor receptor Kit                          | 1 | 2.221 | NA    | NA    |
| Q16655 | Melanoma antigen recognized by T-cells 1                            | 1 | 1.375 | NA    | NA    |
| P55145 | Mesencephalic astrocyte-derived neurotrophic factor                 | 3 | 1.171 | 0.108 | 0.281 |
| Q13361 | Microfibrillar-associated protein 5                                 | 2 | 0.289 | NA    | NA    |
| Q9UPN3 | Microtubule-actin cross-linking factor 1, isoforms 1/2/3/5          | 4 | 0.873 | 0.132 | 0.379 |
| P11137 | Microtubule-associated protein 2                                    | 1 | 1.366 | NA    | NA    |
| Q8N183 | Mimitin, mitochondrial                                              | 1 | 1.883 | NA    | NA    |
| Q8TC79 | Minor histocompatibility antigen H13                                | 1 | 1.182 | NA    | NA    |
| Q02978 | Mitochondrial 2-oxoglutarate/malate carrier protein                 | 2 | 1.091 | NA    | NA    |
| Q9Y5J7 | Mitochondrial import inner membrane translocase subunit Tim9        | 1 | 1.420 | NA    | NA    |
| P28482 | Mitogen-activated protein kinase 1                                  | 1 | 1.146 | NA    | NA    |
| Q9Y3D0 | Mitotic spindle-associated MMXD complex subunit MIP18               | 1 | 1.502 | NA    | NA    |
| Q9NR56 | Muscleblind-like protein 1                                          | 1 | 2.098 | NA    | NA    |
| O95297 | Myelin protein zero-like protein 1                                  | 1 | 0.650 | NA    | NA    |
| P24158 | Myeloblastin                                                        | 1 | 3.403 | NA    | NA    |
| P41218 | Myeloid cell nuclear differentiation antigen                        | 1 | 3.062 | NA    | NA    |
| Q8NFV8 | N-acetylneuraminase cytidyltransferase                              | 1 | 0.627 | NA    | NA    |
| P51688 | N-sulphoglucosamine sulphohydrolase                                 | 1 | 2.376 | NA    | NA    |
| O94760 | N(G),N(G)-dimethylarginine dimethylaminohydrolase 1                 | 1 | 0.427 | NA    | NA    |
| O95182 | NADH dehydrogenase [ubiquinone] 1 alpha subcomplex subunit 7        | 1 | 1.619 | NA    | NA    |
| Q8WXX0 | Nesprin-2                                                           | 2 | 0.765 | NA    | NA    |
| O14786 | Neurophilin-1                                                       | 2 | 0.307 | NA    | NA    |
| Q9Y639 | Neuroplastin                                                        | 2 | 0.685 | NA    | NA    |
| Q6PLU2 | Neutral cholesterol ester hydrolase 1                               | 1 | 2.255 | NA    | NA    |
| P59605 | Neurophilin defensin 1                                              | 1 | 4.027 | NA    | NA    |
| P08246 | Neutrophil elastase                                                 | 1 | 2.417 | NA    | NA    |
| O15118 | Niemann-Pick C1 protein                                             | 2 | 1.413 | NA    | NA    |
| Q5JPE7 | Nodal modulator 2                                                   | 1 | 1.228 | NA    | NA    |
| Q9Y266 | Nuclear migration protein nudC                                      | 1 | 1.206 | NA    | NA    |
| Q9H1E3 | Nuclear ubiquitously casein and cyclin-dependent kinase substrate 1 | 2 | 3.585 | NA    | NA    |
| P67809 | Nuclease-sensitive element-binding protein 1                        | 1 | 2.848 | NA    | NA    |
| P80303 | Nucleobindin-2                                                      | 1 | 1.072 | NA    | NA    |
| Q14978 | Nucleolar and coiled-body phosphoprotein 1                          | 1 | 1.991 | NA    | NA    |
| Q01065 | Nucleosolin TIAR                                                    | 1 | 0.992 | NA    | NA    |
| QULWY5 | Olfactomedin-like protein 1                                         | 2 | 0.144 | NA    | NA    |
| Q9NRN5 | Olfactomedin-like protein 3                                         | 1 | 0.129 | NA    | NA    |
| Q9UL41 | Paraneoplastic antigen Ma3                                          | 1 | 6.849 | NA    | NA    |
| Q8NB37 | Parkinson disease 7 domain-containing protein 1                     | 1 | 1.071 | NA    | NA    |
| O00151 | PDZ and LIM domain protein 1                                        | 1 | 1.206 | NA    | NA    |
| Q9NR12 | PDZ and LIM domain protein 7                                        | 1 | 0.374 | NA    | NA    |
| Q96A73 | Peptidyl-prolyl cis-trans isomerase FKBP10                          | 1 | 1.232 | NA    | NA    |
| Q00688 | Peptidyl-prolyl cis-trans isomerase FKBP3                           | 1 | 1.706 | NA    | NA    |
| P48426 | Phosphatidylinositol 5-phosphate 4-kinase type-2 alpha              | 3 | 1.700 | 0.178 | 0.096 |
| P36871 | Phosphoglucomutase-1                                                | 2 | 2.026 | NA    | NA    |
| Q96G03 | Phosphoglucomutase-2                                                | 1 | 3.656 | NA    | NA    |
| P14555 | Phospholipase A2, membrane associated                               | 2 | 0.212 | NA    | NA    |
| Q9HBL7 | Plasminogen receptor (KT)                                           | 1 | 0.760 | NA    | NA    |
| P02776 | Platelet factor 4                                                   | 1 | 0.584 | NA    | NA    |
| P21246 | Pleiotrophin                                                        | 2 | 0.105 | NA    | NA    |
| Q9UMS4 | Pre-mRNA-processing factor 19                                       | 1 | 1.102 | NA    | NA    |
| P51758 | Prefoldin subunit 3                                                 | 1 | 0.921 | NA    | NA    |
| Q9NOP4 | Prefoldin subunit 4                                                 | 1 | 1.304 | NA    | NA    |
| P09668 | Pro-cathepsin H                                                     | 1 | 1.511 | NA    | NA    |
| Q8NDH3 | Probable aminopeptidase NPEPL1                                      | 1 | 0.949 | NA    | NA    |
| Q99848 | Probable rRNA-processing protein EBP2                               | 1 | 3.956 | NA    | NA    |
| P12004 | Proliferating cell nuclear antigen                                  | 1 | 1.771 | NA    | NA    |
| Q8NSC1 | Protein FAM26E                                                      | 1 | 0.149 | NA    | NA    |
| P35813 | Protein phosphatase 1A                                              | 1 | 0.761 | NA    | NA    |
| Q13123 | Protein Red                                                         | 1 | 1.399 | NA    | NA    |
| P05109 | Protein S100-A8                                                     | 1 | 4.046 | NA    | NA    |
| P06702 | Protein S100-A9                                                     | 1 | 5.754 | NA    | NA    |
| P55735 | Protein SEC13 homolog                                               | 1 | 0.765 | NA    | NA    |
| Q08AM6 | Protein VAC14 homolog                                               | 2 | 1.798 | NA    | NA    |
| P00734 | Prothrombin                                                         | 2 | 1.963 | NA    | NA    |
| Q9NQ39 | Putative 40S ribosomal protein S10-like                             | 1 | 2.025 | NA    | NA    |
| Q6H4N2 | Putative adenosylhomocysteinase 3                                   | 1 | 0.360 | NA    | NA    |
| Q6GMV3 | Putative peptidyl-RNA hydrolase PTRHD1                              | 1 | 1.648 | NA    | NA    |
| Q43143 | Putative pre-mRNA-splicing factor ATP-dependent RNA helicase DHX15  | 1 | 1.208 | NA    | NA    |
| Q9Y383 | Putative RNA-binding protein Luc7-like 2                            | 3 | 1.413 | 0.210 | 0.242 |
| Q9NV59 | Pyridoxine-5'-phosphate oxidase                                     | 1 | 0.988 | NA    | NA    |
| Q15404 | Ras suppressor protein 1                                            | 1 | 0.464 | NA    | NA    |
| P15153 | Ras-related C3 botulinum toxin substrate 2                          | 2 | 1.338 | NA    | NA    |
| Q9HB90 | Ras-related GTP-binding protein C                                   | 1 | 1.401 | NA    | NA    |
| Q13637 | Ras-related protein Rab-32                                          | 1 | 3.642 | NA    | NA    |
| P09575 | Receptor-type tyrosine-protein phosphatase C                        | 2 | 1.316 | NA    | NA    |
| Q96DB5 | Regulator of microtubule dynamics protein 1                         | 1 | 2.046 | NA    | NA    |
| Q96D15 | Reticulocalbin-3                                                    | 1 | 0.654 | NA    | NA    |
| P60891 | Ribose-phosphate pyrophosphokinase 1                                | 1 | 0.872 | NA    | NA    |
| Q96PK6 | RNA-binding protein 14                                              | 1 | 1.143 | NA    | NA    |
| Q15413 | Ryanodine receptor 3                                                | 1 | 0.506 | NA    | NA    |
| Q9NVA2 | Septin-11                                                           | 3 | 0.605 | 0.178 | 0.106 |
| Q8I870 | Serine/arginine-rich splicing factor 4                              | 1 | 3.243 | NA    | NA    |
| O75914 | Serine/threonine-protein kinase PAK 3                               | 1 | 0.789 | NA    | NA    |
| P52140 | Serine/threonine-protein phosphatase PP1-beta catalytic subunit     | 1 | 1.380 | NA    | NA    |
| P27169 | Serum paraoxonase/arylesterase 1                                    | 1 | 7.234 | NA    | NA    |
| Q15165 | Serum paraoxonase/arylesterase 2                                    | 1 | 0.671 | NA    | NA    |
| Q96Z22 | Sialoadhesin                                                        | 1 | 0.607 | NA    | NA    |
| Q15005 | Signal peptidase complex subunit 2                                  | 1 | 1.012 | NA    | NA    |
| Q13573 | SNW domain-containing protein 1                                     | 1 | 2.341 | NA    | NA    |
| P30626 | Sorcin                                                              | 1 | 0.900 | NA    | NA    |
| O60749 | Sorting nexin-2                                                     | 2 | 0.934 | NA    | NA    |
| Q9H2G2 | STE20-like serine/threonine-protein kinase                          | 1 | 1.337 | NA    | NA    |
| P50225 | Sulfotransferase 1A1                                                | 1 | 1.114 | NA    | NA    |
| O15260 | Surfeit locus protein 4                                             | 1 | 0.902 | NA    | NA    |
| Q9HCJ6 | Synaptic vesicle membrane protein VAT-1 homolog-like                | 1 | 0.096 | NA    | NA    |
| P24821 | Tenascin                                                            | 1 | 1.785 | NA    | NA    |
| Q99614 | Tetrapeptide repeat protein 1                                       | 1 | 1.439 | NA    | NA    |
| P26639 | Threonine-tRNA ligase, cytoplasmic                                  | 1 | 1.286 | NA    | NA    |
| P23919 | Thymidylate kinase                                                  | 1 | 0.917 | NA    | NA    |
| Q9P016 | Thymocyte nuclear protein 1                                         | 1 | 1.225 | NA    | NA    |
| Q15455 | Toll-like receptor 3                                                | 1 | 0.858 | NA    | NA    |
| Q5UW68 | Transmembrane protein 205                                           | 1 | 2.288 | NA    | NA    |
| Q9NYL9 | Tropomodulin-3                                                      | 1 | 0.574 | NA    | NA    |
| P68363 | Tubulin alpha-1B chain                                              | 1 | 0.565 | NA    | NA    |
| Q9BVJ6 | U3 small nucleolar RNA-associated protein 14 homolog A              | 1 | 2.937 | NA    | NA    |
| Q92890 | Ubiquitin fusion degradation protein 1 homolog                      | 2 | 1.431 | NA    | NA    |
| Q14376 | UDP-glucose 4-epimerase                                             | 1 | 2.481 | NA    | NA    |
| Q9NYU1 | UDP-glucose:glycoprotein glucosyltransferase 2                      | 1 | 1.907 | NA    | NA    |
| Q00160 | Unconventional myosin-II                                            | 2 | 1.721 | NA    | NA    |
| Q13488 | V-type proton ATPase 116 kDa subunit a isoform 3                    | 2 | 1.323 | NA    | NA    |
| Q15904 | V-type proton ATPase subunit S1                                     | 1 | 1.475 | NA    | NA    |
| O75351 | Vacuolar protein sorting-associated protein 4B                      | 1 | 1.805 | NA    | NA    |
| Q9NZ01 | Very-long-chain enoyl-CoA reductase                                 | 1 | 0.554 | NA    | NA    |
| Q12907 | Vesicular integral-membrane protein VIP36                           | 1 | 1.011 | NA    | NA    |
| O60504 | Vinexin                                                             | 1 | 0.631 | NA    | NA    |
| Q96936 | Voltage-gated hydrogen channel 1                                    | 1 | 1.564 | NA    | NA    |
| Q13303 | Voltage-gated potassium channel subunit beta-2                      | 1 | 2.315 | NA    | NA    |
| QSSNT6 | WASH complex subunit FAM21B                                         | 1 | 4.948 | NA    | NA    |
| Q9GZS3 | WD repeat-containing protein 61                                     | 1 | 1.249 | NA    | NA    |
| Q562E7 | WD repeat-containing protein 81                                     | 1 | 1.315 | NA    | NA    |

Proteins (n = 255) detected only in metastasized UM tumors among 1646 total proteins quantified with 2 or more peptides in metastatic samples UM 19, 21, 24, 28, 30 and non-metastatic samples UM 13, 20, 23, 25, 26. NA, not applicable, <n<3 samples.
