# Supplementary material for: iTRAQ Quantitative Proteomic Comparison of Metastatic and Non-Metastatic Uveal Melanoma Tumors
Source: PubMed Central journal article supplement (PMC4549237; doi:10.1371/journal.pone.0135543), 2015-08-25
Supplement: pone.0135543.s020.pdf [file pone.0135543.s020.pdf]

Supplementary Table S20  
**Relative Abundance: Proteins Detected Only in Non-Metastatic UM Tumors**

| Uni-Prot Accession | Protein                                                          | Sample Frequency<br>n = 5 total | Ratio<br>UM/Control | SEM   | p value |
|--------------------|------------------------------------------------------------------|---------------------------------|---------------------|-------|---------|
| Q0446              | 1,4-alpha-glucan-branching enzyme                                | 2                               | 2.004               | NA    | NA      |
| Q9NRX4             | 14 kDa phosphohistidine phosphatase                              | 1                               | 2.133               | NA    | NA      |
| P62333             | 26S protease regulatory subunit 10B                              | 1                               | 0.968               | NA    | NA      |
| O75832             | 26S proteasome non-ATPase regulatory subunit 10                  | 1                               | 0.860               | NA    | NA      |
| P51398             | 28S ribosomal protein S29, mitochondrial                         | 1                               | 1.010               | NA    | NA      |
| P31937             | 3-hydroxyisobutyrate dehydrogenase, mitochondrial                | 2                               | 1.854               | NA    | NA      |
| Q06136             | 3-ketodihydroxyphosphingosine reductase                          | 1                               | 1.361               | NA    | NA      |
| Q13405             | 39S ribosomal protein L49, mitochondrial                         | 1                               | 1.706               | NA    | NA      |
| P62861             | 40S ribosomal protein S30                                        | 1                               | 2.207               | NA    | NA      |
| O14841             | 5-oxoprolinase                                                   | 1                               | 1.723               | NA    | NA      |
| Q9H0D6             | 5'-3' exonuclease 2                                              | 1                               | 0.683               | NA    | NA      |
| Q86UY8             | 5'-nucleotidase domain-containing protein 3                      | 1                               | 1.379               | NA    | NA      |
| P61313             | 60S ribosomal protein L15                                        | 2                               | 1.299               | NA    | NA      |
| P62888             | 60S ribosomal protein L30                                        | 1                               | 0.929               | NA    | NA      |
| P62899             | 60S ribosomal protein L31                                        | 3                               | 1.246               | 0.139 | 0.255   |
| Q6DK11             | 60S ribosomal protein L7-like 1                                  | 1                               | 1.461               | NA    | NA      |
| Q9NPJ3             | Acyl-coenzyme A thioesterase 13                                  | 1                               | 2.105               | NA    | NA      |
| P49753             | Acyl-coenzyme A thioesterase 2, mitochondrial                    | 1                               | 1.625               | NA    | NA      |
| Q9Y305             | Acyl-coenzyme A thioesterase 9, mitochondrial                    | 1                               | 0.749               | NA    | NA      |
| P13798             | Acylamino-acid-releasing enzyme                                  | 3                               | 2.110               | 0.062 | 0.007   |
| Q53H12             | Acylglycerol kinase, mitochondrial                               | 1                               | 1.112               | NA    | NA      |
| Q6P587             | Acylpyruvase FAHD1, mitochondrial                                | 1                               | 0.903               | NA    | NA      |
| P00568             | Adenylate kinase isoenzyme 1                                     | 1                               | 2.218               | NA    | NA      |
| Q10588             | ADP-ribosyl cyclase/cyclic ADP-ribose hydrolase 2                | 1                               | 0.280               | NA    | NA      |
| P36404             | ADP-ribosylation factor-like protein 2                           | 1                               | 1.283               | NA    | NA      |
| P36405             | ADP-ribosylation factor-like protein 3                           | 1                               | 0.498               | NA    | NA      |
| Q96BM9             | ADP-ribosylation factor-like protein 8A                          | 2                               | 1.186               | NA    | NA      |
| P12236             | ADP/ATP translocase 3                                            | 2                               | 1.145               | NA    | NA      |
| Q9Y6J3             | Adseverin                                                        | 1                               | 4.470               | NA    | NA      |
| Q8I283             | Aldehyde dehydrogenase family 16 member A1                       | 1                               | 0.823               | NA    | NA      |
| Q9BQ10             | Allograft inflammatory factor 1-like                             | 3                               | 1.376               | 0.130 | 0.134   |
| P37840             | Alpha-synuclein                                                  | 1                               | 1.391               | NA    | NA      |
| Q9H4A4             | Aminopeptidase B                                                 | 2                               | 1.965               | NA    | NA      |
| Q01484             | Ankyrin-2                                                        | 1                               | 0.539               | NA    | NA      |
| O14617             | AP-3 complex subunit delta-1                                     | 1                               | 1.163               | NA    | NA      |
| Q6P948             | Aspartate--tRNA ligase, mitochondrial                            | 2                               | 2.980               | NA    | NA      |
| Q8WWM7             | Ataxin-2-like protein                                            | 1                               | 1.753               | NA    | NA      |
| P53396             | ATP-citrate synthase                                             | 2                               | 0.824               | NA    | NA      |
| O00148             | ATP-dependent RNA helicase DDX39A                                | 1                               | 1.703               | NA    | NA      |
| O15523             | ATP-dependent RNA helicase DDX3Y                                 | 1                               | 0.853               | NA    | NA      |
| O75531             | Barrier-to-autointegration factor                                | 2                               | 2.264               | NA    | NA      |
| Q13884             | Beta-1-syntrophin                                                | 1                               | 0.561               | NA    | NA      |
| P51817             | cAMP-dependent protein kinase catalytic subunit PRKX             | 1                               | 1.527               | NA    | NA      |
| P43235             | Cathepsin K                                                      | 1                               | 3.533               | NA    | NA      |
| P20645             | Cation-dependent mannose-6-phosphate receptor                    | 3                               | 1.127               | 0.103 | 0.367   |
| Q9Y5K6             | CD2-associated protein                                           | 1                               | 1.211               | NA    | NA      |
| Q9N245             | CDGSH iron-sulfur domain-containing protein 1                    | 1                               | 0.702               | NA    | NA      |
| Q9Y696             | Chloride intracellular channel protein 4                         | 2                               | 1.495               | NA    | NA      |
| Q8NUJ6             | Chondroectin-like protein                                        | 1                               | 0.192               | NA    | NA      |
| Q96A33             | Coiled-coil domain-containing protein 47                         | 1                               | 1.074               | NA    | NA      |
| P02458             | Collagen alpha-1(I) chain                                        | 1                               | 1.115               | NA    | NA      |
| P08174             | Complement decay-accelerating factor                             | 2                               | 0.663               | NA    | NA      |
| O14618             | Copper chaperone for superoxide dismutase                        | 1                               | 2.239               | NA    | NA      |
| Q13619             | Cullin-4A                                                        | 1                               | 1.761               | NA    | NA      |
| O14949             | Cytochrome b-c1 complex subunit 8                                | 1                               | 1.160               | NA    | NA      |
| Q13409             | Cytoplasmic dynein 1 intermediate chain 2                        | 1                               | 1.199               | NA    | NA      |
| Q9Y6G9             | Cytoplasmic dynein 1 light intermediate chain 1                  | 2                               | 0.927               | NA    | NA      |
| P53634             | Dipeptidyl peptidase 1                                           | 1                               | 1.356               | NA    | NA      |
| O60884             | DnaJ homolog subfamily A member 2                                | 1                               | 0.687               | NA    | NA      |
| P55265             | Double-stranded RNA-specific adenosine deaminase                 | 3                               | 1.359               | 0.145 | 0.169   |
| O75923             | Dysferlin                                                        | 1                               | 0.545               | NA    | NA      |
| P11532             | Dystrophin                                                       | 1                               | 0.551               | NA    | NA      |
| Q95834             | Echinoderm microtubule-associated protein-like 2                 | 3                               | 2.528               | 0.215 | 0.050   |
| Q9NZN3             | EH domain-containing protein 3                                   | 1                               | 0.348               | NA    | NA      |
| Q9BXX0             | EMILIN-2                                                         | 1                               | 0.941               | NA    | NA      |
| Q9Y371             | Endophilin-B1                                                    | 1                               | 1.572               | NA    | NA      |
| Q9NR46             | Endophilin-B2                                                    | 1                               | 0.812               | NA    | NA      |
| O75521             | Enoyl-CoA delta isomerase 2, mitochondrial                       | 3                               | 0.990               | 0.129 | 0.947   |
| Q9NPA0             | ER membrane protein complex subunit 7                            | 1                               | 1.302               | NA    | NA      |
| P16452             | Erythrocyte membrane protein band 4.2                            | 1                               | 0.221               | NA    | NA      |
| Q14240             | Eukaryotic initiation factor 4A-II                               | 3                               | 1.929               | 0.058 | 0.008   |
| Q13347             | Eukaryotic translation initiation factor 3 subunit I             | 1                               | 1.064               | NA    | NA      |
| Q9UBQ5             | Eukaryotic translation initiation factor 3 subunit K             | 1                               | 1.619               | NA    | NA      |
| Q15056             | Eukaryotic translation initiation factor 4H                      | 1                               | 1.408               | NA    | NA      |
| P55010             | Eukaryotic translation initiation factor 5                       | 1                               | 2.484               | NA    | NA      |
| O60645             | Exocyst complex component 3                                      | 2                               | 0.559               | NA    | NA      |
| Q01469             | Fatty acid-binding protein, epidermal                            | 1                               | 1.410               | NA    | NA      |
| Q05397             | Focal adhesion kinase 1                                          | 1                               | 1.212               | NA    | NA      |
| P51116             | Fragile X mental retardation syndrome-related protein 2          | 2                               | 0.811               | NA    | NA      |
| Q9Y653             | G-protein coupled receptor 56                                    | 1                               | 1.813               | NA    | NA      |
| O94925             | Glutaminase kidney isoform, mitochondrial                        | 1                               | 0.838               | NA    | NA      |
| Q06210             | Glutamine--fructose-6-phosphate aminotransferase [isomerizing] 1 | 1                               | 1.491               | NA    | NA      |
| P47897             | Glutamine--tRNA ligase                                           | 1                               | 0.983               | NA    | NA      |
| P46439             | Glutathione S-transferase Mu 5                                   | 1                               | 1.274               | NA    | NA      |
| P30711             | Glutathione S-transferase theta-1                                | 1                               | 1.375               | NA    | NA      |
| P0C329             | Glutathione S-transferase theta-2                                | 1                               | 1.224               | NA    | NA      |
| P46976             | Glycogenin-1                                                     | 1                               | 0.920               | NA    | NA      |
| P36959             | GMP reductase 1                                                  | 1                               | 2.525               | NA    | NA      |
| Q14789             | Golgin subfamily B member 1                                      | 1                               | 0.999               | NA    | NA      |
| Q9HAV7             | GrpE protein homolog 1, mitochondrial                            | 1                               | 1.460               | NA    | NA      |
| Q9HOR4             | Haloacid dehalogenase-like hydrolase domain-containing protein 2 | 1                               | 2.624               | NA    | NA      |
| P00739             | Haptoglobin-related protein                                      | 1                               | 0.407               | NA    | NA      |
| P12081             | Histidine--tRNA ligase, cytoplasmic                              | 1                               | 2.063               | NA    | NA      |
| Q99879             | Histone H2B type 1-M                                             | 1                               | 1.356               | NA    | NA      |
| Q16576             | Histone-binding protein RBBP7                                    | 2                               | 1.605               | NA    | NA      |
| P01892             | HLA class I histocompatibility antigen, A-2 alpha chain          | 1                               | 0.371               | NA    | NA      |
| P30512             | HLA class I histocompatibility antigen, A-29 alpha chain         | 1                               | 1.499               | NA    | NA      |
| P30485             | HLA class I histocompatibility antigen, B-47 alpha chain         | 1                               | 0.889               | NA    | NA      |
| P30508             | HLA class I histocompatibility antigen, Cw-12 alpha chain        | 1                               | 0.827               | NA    | NA      |
| P20039             | HLA class II histocompatibility antigen, DRB1-11 beta chain      | 1                               | 3.072               | NA    | NA      |
| Q29974             | HLA class II histocompatibility antigen, DRB1-16 beta chain      | 1                               | 0.430               | NA    | NA      |
| Q16543             | Hsp90 co-chaperone Cdc37                                         | 2                               | 1.616               | NA    | NA      |
| Q16775             | Hydroxyacylglutathione hydrolase, mitochondrial                  | 1                               | 0.676               | NA    | NA      |
| Q969P0             | Immunoglobulin superfamily member 8                              | 2                               | 0.703               | NA    | NA      |
| P20591             | Interferon-induced GTP-binding protein Mx1                       | 1                               | 2.317               | NA    | NA      |
| P09914             | Interferon-induced protein with tetratricopeptide repeats 1      | 1                               | 1.966               | NA    | NA      |
| Q5VWZ2             | Lysophospholipase-like protein 1                                 | 1                               | 1.863               | NA    | NA      |
| P13473             | Lysosome-associated membrane glycoprotein 2                      | 2                               | 0.980               | NA    | NA      |
| P56192             | Methionine--tRNA ligase, cytoplasmic                             | 2                               | 1.309               | NA    | NA      |
| Q9HCC0             | Methylcrotonoyl-CoA carboxylase beta chain, mitochondrial        | 1                               | 1.004               | NA    | NA      |
| Q13825             | Methylglutacetyl-CoA hydratase, mitochondrial                    | 1                               | 0.936               | NA    | NA      |
| P55083             | Microfilin-associated glycoprotein 4                             | 1                               | 0.365               | NA    | NA      |
| O14880             | Microsomal glutathione S-transferase 3                           | 1                               | 1.414               | NA    | NA      |
| O60220             | Mitochondrial import inner membrane translocase subunit Tim8 A   | 1                               | 3.847               | NA    | NA      |
| O96008             | Mitochondrial import receptor subunit TOM40 homolog              | 1                               | 0.828               | NA    | NA      |
| P27361             | Mitogen-activated protein kinase 3                               | 1                               | 0.784               | NA    | NA      |
| P53985             | Monocarboxylate transporter 1                                    | 1                               | 1.967               | NA    | NA      |
| Q9H7C9             | Mth938 domain-containing protein                                 | 1                               | 1.850               | NA    | NA      |
| Q7Z406             | Myosin-14                                                        | 2                               | 0.551               | NA    | NA      |
| Q8NCW5             | NAD(P)H-hydrate epimerase                                        | 1                               | 3.819               | NA    | NA      |
| O96000             | NADH dehydrogenase [ubiquinone] 1 beta subcomplex subunit 10     | 2                               | 1.442               | NA    | NA      |
| P17568             | NADH dehydrogenase [ubiquinone] 1 beta subcomplex subunit 7      | 1                               | 0.671               | NA    | NA      |
| P49821             | NADH dehydrogenase [ubiquinone] flavoprotein 1, mitochondrial    | 2                               | 1.261               | NA    | NA      |

Table S20-Proteins Only in Non-Metastatic Tumors

|        |                                                                                 |   |       |       |       |
|--------|---------------------------------------------------------------------------------|---|-------|-------|-------|
| O00217 | NADH dehydrogenase [ubiquinone] iron-sulfur protein 8, mitochondrial            | 1 | 1.869 | NA    | NA    |
| Q9UMX5 | Neudesin                                                                        | 2 | 0.950 | NA    | NA    |
| P32004 | Neural cell adhesion molecule L1                                                | 1 | 0.462 | NA    | NA    |
| P07196 | Neurofilament light polypeptide                                                 | 2 | 0.094 | NA    | NA    |
| Q9BYT8 | Neurolysin, mitochondrial                                                       | 1 | 2.580 | NA    | NA    |
| Q92542 | Nicastrin                                                                       | 1 | 0.831 | NA    | NA    |
| Q6XQ66 | Nicotinate phosphoribosyltransferase                                            | 1 | 3.714 | NA    | NA    |
| P05204 | Non-histone chromosomal protein HMG-17                                          | 1 | 7.968 | NA    | NA    |
| Q9BW27 | Nuclear pore complex protein Nup85                                              | 1 | 0.984 | NA    | NA    |
| P17480 | Nucleolar transcription factor 1                                                | 1 | 1.523 | NA    | NA    |
| P22392 | Nucleoside diphosphate kinase B                                                 | 1 | 1.963 | NA    | NA    |
| Q9NTK5 | Obg-like ATPase 1                                                               | 2 | 1.135 | NA    | NA    |
| Q9NX40 | OCA1 domain-containing protein 1                                                | 1 | 1.284 | NA    | NA    |
| P04181 | Ornithine aminotransferase, mitochondrial                                       | 1 | 1.865 | NA    | NA    |
| Q9BZF1 | Oxysterol-binding protein-related protein 8                                     | 1 | 1.613 | NA    | NA    |
| P50897 | Palmitoyl-protein thioesterase 1                                                | 1 | 1.248 | NA    | NA    |
| Q53GG5 | PDZ and LIM domain protein 3                                                    | 1 | 0.698 | NA    | NA    |
| Q02790 | Peptidyl-prolyl cis-trans isomerase FKBP4                                       | 2 | 1.407 | NA    | NA    |
| P51659 | Peroxisomal multifunctional enzyme type 2                                       | 1 | 0.544 | NA    | NA    |
| Q05571 | Persulfide dioxygenase ETHE1, mitochondrial                                     | 1 | 1.737 | NA    | NA    |
| Q9Y285 | Phenylalanine--tRNA ligase alpha subunit                                        | 1 | 1.914 | NA    | NA    |
| P42356 | Phosphatidylinositol 4-kinase alpha                                             | 1 | 0.992 | NA    | NA    |
| P36969 | Phospholipid hydroperoxide glutathione peroxidase, mitochondrial                | 1 | 0.759 | NA    | NA    |
| Q9H307 | Pinin                                                                           | 1 | 2.406 | NA    | NA    |
| Q15102 | Platelet-activating factor acetylhydrolase IB subunit gamma                     | 3 | 2.147 | 0.281 | 0.113 |
| O60486 | Plexin-C1                                                                       | 3 | 1.113 | 0.043 | 0.129 |
| O95758 | Polypyrimidine tract-binding protein 3                                          | 1 | 1.587 | NA    | NA    |
| O75400 | Pre-mRNA-processing factor 40 homolog A                                         | 1 | 1.493 | NA    | NA    |
| Q9UHV9 | Prefoldin subunit 2                                                             | 2 | 1.010 | NA    | NA    |
| Q99471 | Prefoldin subunit 5                                                             | 1 | 1.412 | NA    | NA    |
| P51531 | Probable global transcription activator SNF2L2                                  | 1 | 1.049 | NA    | NA    |
| P48147 | Prolyl endopeptidase                                                            | 1 | 1.851 | NA    | NA    |
| Q15185 | Prostaglandin E synthase 3                                                      | 1 | 2.246 | NA    | NA    |
| P25789 | Proteasome subunit alpha type-4                                                 | 1 | 2.697 | NA    | NA    |
| P49720 | Proteasome subunit beta type-3                                                  | 1 | 1.790 | NA    | NA    |
| P28072 | Proteasome subunit beta type-6                                                  | 1 | 2.054 | NA    | NA    |
| Q99436 | Proteasome subunit beta type-7                                                  | 2 | 1.470 | NA    | NA    |
| P28062 | Proteasome subunit beta type-8                                                  | 1 | 1.348 | NA    | NA    |
| Q9UKY7 | Protein CDV3 homolog                                                            | 1 | 1.701 | NA    | NA    |
| O60888 | Protein CutA                                                                    | 1 | 3.458 | NA    | NA    |
| Q96JJ7 | Protein disulfide-isomerase TMX3                                                | 1 | 0.938 | NA    | NA    |
| Q9UKS6 | Protein kinase C and casein kinase substrate in neurons protein 3               | 1 | 0.263 | NA    | NA    |
| P49593 | Protein phosphatase 1F                                                          | 2 | 0.867 | NA    | NA    |
| Q8WUY3 | Protein prune homolog 2                                                         | 1 | 1.694 | NA    | NA    |
| P23297 | Protein S100-A1                                                                 | 1 | 2.730 | NA    | NA    |
| Q02734 | Protein TFG                                                                     | 1 | 0.549 | NA    | NA    |
| P61457 | Pterin-4-alpha-carbinolamine dehydratase                                        | 1 | 0.919 | NA    | NA    |
| Q5JNZ5 | Putative 40S ribosomal protein S26-like 1                                       | 2 | 2.441 | NA    | NA    |
| Q2VIR3 | Putative eukaryotic translation initiation factor 2 subunit 3-like protein      | 1 | 0.598 | NA    | NA    |
| P01893 | Putative HLA class I histocompatibility antigen, alpha chain H                  | 1 | 0.506 | NA    | NA    |
| Q8NHP8 | Putative phospholipase B-like 2                                                 | 1 | 1.607 | NA    | NA    |
| Q8NFI4 | Putative protein FAM10A5                                                        | 1 | 0.786 | NA    | NA    |
| Q08257 | Quinone oxidoreductase                                                          | 1 | 1.443 | NA    | NA    |
| P35241 | Radixin                                                                         | 1 | 0.759 | NA    | NA    |
| P60763 | Ras-related C3 botulinum toxin substrate 3                                      | 1 | 0.953 | NA    | NA    |
| Q8WUD1 | Ras-related protein Rab-2B                                                      | 1 | 1.052 | NA    | NA    |
| Q05716 | Ras-related protein Rab-3D                                                      | 1 | 1.131 | NA    | NA    |
| P20339 | Ras-related protein Rab-5A                                                      | 1 | 0.546 | NA    | NA    |
| P20340 | Ras-related protein Rab-6A                                                      | 1 | 1.265 | NA    | NA    |
| P61006 | Ras-related protein Rab-8A                                                      | 1 | 1.107 | NA    | NA    |
| O95197 | Reticulon-3                                                                     | 1 | 0.504 | NA    | NA    |
| Q16518 | Retinoid isomerohydrolase                                                       | 1 | 0.144 | NA    | NA    |
| O00584 | Ribonuclease T2                                                                 | 1 | 3.119 | NA    | NA    |
| P16083 | Ribosylthiuronamide dehydrogenase [quinone]                                     | 1 | 3.470 | NA    | NA    |
| P10768 | S-formylglutathione hydrolase                                                   | 2 | 2.152 | NA    | NA    |
| Q13126 | S-methyl-5'-thioadenosine phosphorylase                                         | 3 | 2.197 | 0.117 | 0.021 |
| P82979 | SAP domain-containing ribonucleoprotein                                         | 1 | 2.726 | NA    | NA    |
| Q9UL12 | Sarcosine dehydrogenase, mitochondrial                                          | 1 | 2.183 | NA    | NA    |
| P35270 | Septaplerin reductase                                                           | 1 | 2.858 | NA    | NA    |
| Q14141 | Septin-6                                                                        | 1 | 0.272 | NA    | NA    |
| Q05519 | Serine/arginine-rich splicing factor 11                                         | 1 | 1.354 | NA    | NA    |
| Q9Y5S2 | Serine/threonine-protein kinase MRCK beta                                       | 1 | 0.815 | NA    | NA    |
| Q8TD19 | Serine/threonine-protein kinase Nek9                                            | 1 | 0.711 | NA    | NA    |
| O95747 | Serine/threonine-protein kinase OSR1                                            | 1 | 1.366 | NA    | NA    |
| Q14738 | Serine/threonine-protein phosphatase 2A 56 kDa regulatory subunit delta isoform | 1 | 1.358 | NA    | NA    |
| P36873 | Serine/threonine-protein phosphatase PPI-1-gamma catalytic subunit              | 1 | 1.137 | NA    | NA    |
| P35237 | Serp1n B6                                                                       | 1 | 1.729 | NA    | NA    |
| Q9BXP5 | Serrate RNA effector molecule homolog                                           | 1 | 1.093 | NA    | NA    |
| P49594 | Short/branched chain specific acyl-CoA dehydrogenase, mitochondrial             | 2 | 1.202 | NA    | NA    |
| Q9Y5M8 | Signal recognition particle receptor subunit beta                               | 2 | 1.134 | NA    | NA    |
| Q04837 | Single-stranded DNA-binding protein, mitochondrial                              | 1 | 2.050 | NA    | NA    |
| P62316 | Small nuclear ribonucleoprotein Sm D2                                           | 2 | 0.980 | NA    | NA    |
| P14678 | Small nuclear ribonucleoprotein-associated proteins B and B'                    | 1 | 1.338 | NA    | NA    |
| Q6EEV6 | Small ubiquitin-related modifier 4                                              | 1 | 5.688 | NA    | NA    |
| P50993 | Sodium/potassium-transporting ATPase subunit alpha-2                            | 1 | 0.470 | NA    | NA    |
| Q9BX66 | Sorbin and SH3 domain-containing protein 1                                      | 1 | 0.757 | NA    | NA    |
| Q9UMY4 | Sorting nexin-12                                                                | 2 | 1.643 | NA    | NA    |
| O60493 | Sorting nexin-3                                                                 | 2 | 1.122 | NA    | NA    |
| Q8NOX7 | Spartin                                                                         | 1 | 1.143 | NA    | NA    |
| P16949 | Stathmin                                                                        | 2 | 2.627 | NA    | NA    |
| Q02318 | Sterol 26-hydroxylase, mitochondrial                                            | 3 | 1.440 | 0.145 | 0.129 |
| O15498 | Synaptobrevin homolog YKT6                                                      | 1 | 1.542 | NA    | NA    |
| Q13277 | Syntaxin-3                                                                      | 1 | 1.380 | NA    | NA    |
| P51764 | Syntaxin-binding protein 1                                                      | 3 | 0.470 | 0.247 | 0.092 |
| Q00343 | TBC1 domain family member 4                                                     | 1 | 1.594 | NA    | NA    |
| Q63HR2 | Tensin-like C1 domain-containing phosphatase                                    | 2 | 0.190 | NA    | NA    |
| Q8IYW2 | Tetratricopeptide repeat protein 40                                             | 1 | 1.008 | NA    | NA    |
| Q16762 | Thiosulfate sulfurtransferase                                                   | 1 | 1.259 | NA    | NA    |
| P07996 | Thrombospondin-1                                                                | 1 | 0.199 | NA    | NA    |
| P62328 | Thymosin beta-4                                                                 | 2 | 4.334 | NA    | NA    |
| Q07157 | Tight junction protein ZO-1                                                     | 1 | 0.761 | NA    | NA    |
| P62995 | Transformer-2 protein homolog beta                                              | 1 | 1.448 | NA    | NA    |
| P28289 | Tropomodulin-1                                                                  | 1 | 0.351 | NA    | NA    |
| P04350 | Tubulin beta-4A chain                                                           | 1 | 1.622 | NA    | NA    |
| Q9GZM7 | Tubulointerstitial nephritis antigen-like                                       | 1 | 0.532 | NA    | NA    |
| Q99816 | Tumor susceptibility gene 101 protein                                           | 1 | 0.793 | NA    | NA    |
| P54577 | Tyrosine--tRNA ligase, cytoplasmic                                              | 1 | 0.847 | NA    | NA    |
| P78324 | Tyrosine-protein phosphatase non-receptor type substrate 1                      | 1 | 1.549 | NA    | NA    |
| Q14139 | Ubiquitin conjugation factor E4 A                                               | 1 | 1.403 | NA    | NA    |
| Q96FW1 | Ubiquitin thioesterase OTUB1                                                    | 2 | 1.328 | NA    | NA    |
| Q13459 | Unconventional myosin-Ixb                                                       | 1 | 1.219 | NA    | NA    |
| Q96A05 | V-type proton ATPase subunit E 2                                                | 1 | 2.417 | NA    | NA    |
| Q9UI12 | V-type proton ATPase subunit H                                                  | 1 | 1.973 | NA    | NA    |
| Q86WA6 | Valacyclovir hydrolase                                                          | 1 | 1.997 | NA    | NA    |
| Q8IWB7 | WD repeat and FYVE domain-containing protein 1                                  | 2 | 1.384 | NA    | NA    |
| P46937 | Yorkie homolog                                                                  | 3 | 0.753 | 0.096 | 0.099 |

Proteins (n = 239) detected only in non-metastased UM tumors among 1646 total proteins quantified with 2 or more peptides in metastatic samples UM 19, 21, 24, 28, 30 and/or non-metastatic samples UM 13, 20, 23, 25, 26. NA, not applicable, n<3 samples.
